# Supplementary material for: Nickel-catalyzed 1,4-aryl rearrangement of aryl N -benzylimidates via C–O and C–H bond cleavage
Source: Royal Society of Chemistry journal article supplement (doi:10.1039/d2cc02355e), 2022-01-01

## Supporting Information

for

### Nickel-catalyzed 1,4-aryl rearrangement of aryl *N*-benzylimidates via C–O and C–H bond cleavage

Satoshi Ogawa,<sup>1</sup> and Mamoru Tobisu\*<sup>1,2</sup>

<sup>1</sup>*Department of Applied Chemistry, Graduate School of Engineering, Osaka University, Suita, Osaka 565-0871, Japan*

<sup>2</sup>*Innovative Catalysis Science Division, Institute for Open and Transdisciplinary Research Initiatives (ICS-OTRI), Osaka University, Suita, Osaka 565-0871, Japan.*

**28 September 2022**

**Note added after first publication:** This supplementary information file replaces the version originally published on 17 June 2022, in which the kinetic isotope effect value on page S46 was given as 2.4 in error. The correct value of 4.2 is included in this updated version. This does not affect the conclusions of the paper.

## CONTENTS

|             |                                                                   |            |
|-------------|-------------------------------------------------------------------|------------|
| <b>I</b>    | <b>General Information</b>                                        | <b>S2</b>  |
| <b>II</b>   | <b>Materials</b>                                                  | <b>S2</b>  |
| <b>III</b>  | <b>Synthesis of Starting Materials</b>                            | <b>S2</b>  |
| <b>IV</b>   | <b>Optimization Studies</b>                                       | <b>S21</b> |
| <b>V</b>    | <b>A Typical Procedure</b>                                        | <b>S23</b> |
| <b>VI</b>   | <b>Gram-Scale Reaction</b>                                        | <b>S37</b> |
| <b>VII</b>  | <b>Additional Scope and Limitation</b>                            | <b>S38</b> |
| <b>VIII</b> | <b>Chapman Rearrangement of 1aaa</b>                              | <b>S39</b> |
| <b>IX</b>   | <b>Crossover Experiments</b>                                      | <b>S40</b> |
| <b>X</b>    | <b>Kinetic Studies</b>                                            | <b>S43</b> |
| <b>XI</b>   | <b>The Reaction of 3cad under Standard Conditions</b>             | <b>S46</b> |
| <b>XII</b>  | <b>The Reaction of 1aaa in the Presence of Radical Scavengers</b> | <b>S48</b> |
| <b>XIII</b> | <b>Synthetic Applications</b>                                     | <b>S48</b> |
| <b>XIV</b>  | <b>References</b>                                                 | <b>S52</b> |
| <b>XV</b>   | <b>Copies of NMR Spectra</b>                                      | <b>S52</b> |

## I. General Information

$^1\text{H}$ ,  $^{13}\text{C}$ , and  $^{19}\text{F}$  NMR spectra were recorded on a JEOL ECS-400 spectrometer in  $\text{CDCl}_3$ .  $^2\text{H}$  NMR spectra were recorded in  $\text{CHCl}_3$ . The chemical shifts in  $^1\text{H}$  NMR spectra were recorded relative to tetramethylsilane ( $\delta$  0.00). The chemical shifts in  $^2\text{H}$  NMR spectra were recorded relative to  $\text{CDCl}_3$  ( $\delta$  7.26). The chemical shifts in  $^{13}\text{C}$  NMR spectra were recorded relative to  $\text{CDCl}_3$  ( $\delta$  77.0). The chemical shifts in  $^{19}\text{F}$  NMR spectra were recorded relative to hexafluorobenzene ( $\delta$  -163.00). The data is reported as follows: chemical shift ( $\delta$ ) in ppm, multiplicity (s = singlet, d = doublet, t = triplet, q = quartet, and m = multiplet), coupling constant (Hz), and integration. Infrared spectra (IR) were obtained using a JASCO FT/IR-4200 spectrometer. Absorption is reported in reciprocal centimeters ( $\text{cm}^{-1}$ ) with the following relative intensities: s (strong), m (medium), or w (weak). High resolution mass spectra (HRMS) were obtained using a JEOL JMS-T100LP spectrometer. Melting points were determined using a Yamato melting point apparatus. Column chromatography was performed with  $\text{SiO}_2$  (Silica Gel 60N (spherical, neutral) (40-50  $\mu\text{m}$ , KANTO CHEMICAL CO., INC.) and NH Silica (Silica Gel 60 (spherical)  $\text{NH}_2$  (40-50  $\mu\text{m}$ )). Some of the compounds were purified by LC-908 HPLC (GPC). Microwave synthesis was performed by Biotage<sup>®</sup> Initiator+.

## II. Materials

Toluene (deoxygenated) (FUJI FILM Wako Chemicals) and 1,4-dioxane (super dehydrated) (FUJI FILM Wako Chemicals) were used as received.  $\text{Ni}(\text{cod})_2$  was purchased from Strem Chemicals and used as received. PCy<sub>3</sub> (Sigma-Aldrich), dcype (Sigma-Aldrich), dppe (TCI), dcypm (FUJI FILM Wako Chemicals), dcypn (Sigma-Aldrich), IPr·HCl (TCI) and were purchased from commercial suppliers and used as received.

## III. Synthesis of Starting Materials

### Synthesis of Aryl *N*-Benzylimidates

#### General procedure A: Synthesis of imidate with $\text{SOCl}_2$ .<sup>1</sup>

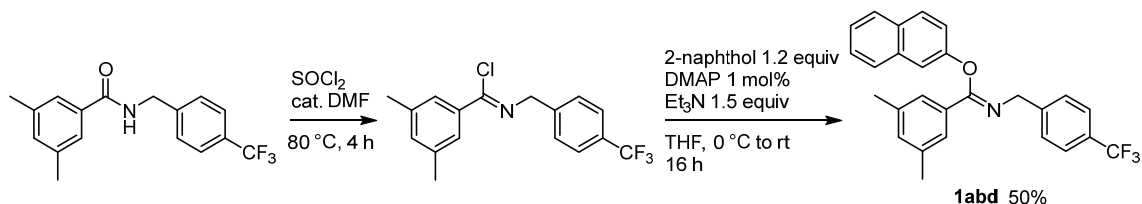

3,5-Dimethyl-*N*-(4-(trifluoromethyl)benzyl)benzamide (1.56 g, 5.1 mmol), DMF (2 drops) and  $\text{SOCl}_2$  (5 mL) were added to a 50 mL two-necked flask. After the mixture was stirred at  $80^\circ\text{C}$  for 4 h, the resulting mixture was concentrated to give the corresponding imidoyl chloride, which was used in the

next step without further purification. The imidoyl chloride was added dropwise to a solution of 2-naphthol (893 mg, 6.2 mmol), Et<sub>3</sub>N (1.1 mL, 7.9 mmol) and DMAP (15 mg, 0.12 mmol) in THF (10 mL) at 0 °C. After the addition was complete, the reaction mixture was stirred at rt for 16 h. After the precipitate (Et<sub>3</sub>N·HCl) was filtered off, the filtrate was concentrated in vacuo. The residue was purified by flash column chromatography (eluent: hexane/EtOAc = 97/3) to give naphthalen-2-yl 3,5-dimethyl-*N*-(4-(trifluoromethyl)benzyl)benzimidate (**1abd**) as a white solid (1.10 g, 50%). Aryl *N*-benzylimidates **1aaa**, **1aab**, **1aac**, **1aad**, **1aae**, **1aaf**, **1bbd**, **1cbd**, **1dbd**, **1ebd**, **1fbd**, **1gbd**, **1hbd**, **1ibd**, **1jbd**, **1kbd**, **1lbd**, **1add**, **1cad**, **1cad-*d*<sub>2</sub>**, **1nbd** and **1obd** were prepared in a similar manner.

#### General Procedure B: Synthesis of imidate with PCl<sub>5</sub>.<sup>2</sup>

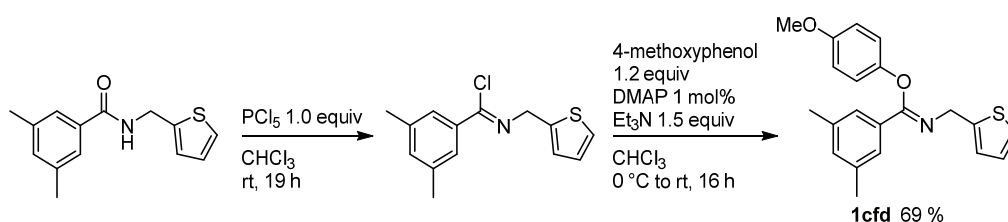

PCl<sub>5</sub> (1.27 g, 6.1 mmol) was added at 0 °C to a solution of 3,5-dimethyl-*N*-(thiophen-2-ylmethyl)benzamide (1.48 g, 6.0 mmol) in CHCl<sub>3</sub> (30 mL). After the mixture was stirred at rt for 19 h, the resulting mixture was concentrated to give the corresponding imidoyl chloride (brown oil), which was used in the next step without further purification. The imidoyl chloride was added dropwise at 0 °C to a solution of 4-methoxyphenol (910 mg, 7.3 mmol), Et<sub>3</sub>N (1.8 mL, 12.9 mmol) and DMAP (16 mg, 0.13 mmol) in CHCl<sub>3</sub> (12 mL). After the addition was complete, the reaction mixture was stirred at rt for 16 h. After the precipitate (Et<sub>3</sub>N·HCl) was filtered off, the filtrate was concentrated in vacuo. The residue was purified by flash column chromatography (eluent: hexane/EtOAc = 100/0 to 95/5) to give 4-methoxyphenyl 3,5-dimethyl-*N*-(thiophen-2-ylmethyl)benzimidate (**1cfd**) as a pale yellow oil (1.47 g, 69%). Aryl *N*-benzylimidates **1ccd**, **1ced** and **1mag** were prepared in a similar manner.

#### Naphthalen-2-yl *N*-benzyl-4-methylbenzimidate (**1aaa**).

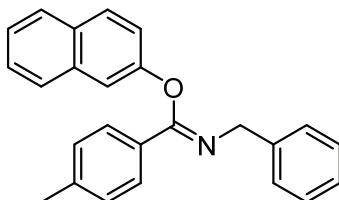

The product was obtained as a mixture of geometrical isomers (*E*:*Z* = 1:17), which was determined by <sup>1</sup>H NMR.

White solid (5.67 g, 87%). R<sub>f</sub> 0.58 (SiO<sub>2</sub>, Hexane/EtOAc = 3/1). Mp 59.1-61.4 °C.

*Major isomer*

$^1\text{H}$  NMR ( $\text{CDCl}_3$ , 400 MHz)  $\delta$ : 2.30 (s, 3H), 4.76 (s, 2H), 7.10 (s, 1H), 7.12 (s, 1H), 7.14 (d,  $J = 2.8$  Hz, 1H), 7.22-7.42 (m, 8H), 7.59 (d,  $J = 8.2$  Hz, 1H), 7.74-7.86 (m, 4H).

$^{13}\text{C}$  NMR ( $\text{CDCl}_3$ , 101 MHz)  $\delta$ : 21.40, 51.82, 110.84, 117.69, 124.46, 126.62, 126.66, 126.92, 127.68, 127.79, 128.32, 128.67, 129.14, 129.59, 129.79, 130.20, 134.17, 139.87, 141.18, 153.20, 153.73.

*Minor isomer*

$^1\text{H}$  NMR ( $\text{CDCl}_3$ , 400 MHz)  $\delta$ : 2.41 (s, 3H), 4.63 (s, 2H), 7.50 (d,  $J = 8.2$  Hz, 2H), 7.67 (d,  $J = 1.8$  Hz, 1H). Other peaks are overlapped with those of a major isomer.

$^{13}\text{C}$  NMR ( $\text{CDCl}_3$ , 101 MHz)  $\delta$ : 21.47, 53.61, 118.42, 122.61, 125.05, 126.10, 126.30, 126.76, 127.48, 127.93, 128.19, 128.78, 130.99, 134.08, 140.38, 140.73, 151.24, 161.18. Other peaks are overlapped with those of a major isomer.

*E/Z Mixture*

IR (KBr): 3030 m, 2892 m, 1653 s, 1626 s, 1597 s, 1508 s, 1463 m, 1455 m, 1352 s, 1272 s, 1244 s, 1206 m, 1165 s, 1063 s, 1112 s, 993 s, 880 m, 854 s, 813 s, 746 s, 735 s, 601 m.

MS,  $m/z$  (relative intensity, %): 351 ( $\text{M}^+$ , 33), 232 (41), 208 (42), 127 (11), 120 (14), 119 (97), 115 (13), 92 (38), 91 (100), 65 (26).

HRMS (DART+,  $[\text{M}+\text{H}]^+$ ) Calcd for  $\text{C}_{25}\text{H}_{22}\text{NO}$ : 352.1696. Found: 352.1706.

**Naphthalen-2-yl *N*-benzyl-4-(trifluoromethyl)benzimidate (1aab).**

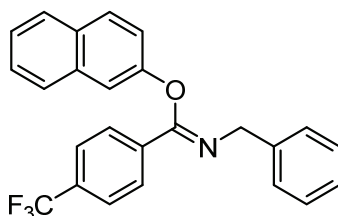

The product was obtained as a mixture of geometrical isomers ( $E:Z = 1:20$ ), which was determined by  $^1\text{H}$  NMR.

Colorless oil (415 mg, 10%).  $R_f$  0.71 ( $\text{SiO}_2$ , Hexane/EtOAc = 1/1).

*Major isomer*

$^1\text{H}$  NMR ( $\text{CDCl}_3$ , 400 MHz)  $\delta$ : 4.80 (s, 2H), 7.12 (d,  $J = 2.1$  Hz, 1H), 7.24-7.28 (m, 2H), 7.32-7.42 (m, 6H), 7.57 (m, 3H), 7.78-7.84 (m, 2H), 8.05 (d,  $J = 8.2$  Hz, 2H).

$^{13}\text{C}$  NMR ( $\text{CDCl}_3$ , 101 MHz)  $\delta$ : 52.15, 110.98, 117.49, 123.76 (q,  $J = 272.2$  Hz), 124.83, 125.41 (q,  $J = 3.8$  Hz), 126.88, 126.92, 126.94, 127.75, 127.83, 128.44, 129.05, 129.80, 130.54, 132.43 (q,  $J = 32.6$  Hz), 134.08, 136.08, 139.31, 152.41, 152.70.

*Minor isomer*

$^1\text{H}$  NMR ( $\text{CDCl}_3$ , 400 MHz)  $\delta$ : 4.58 (s, 2H), 7.71-7.72 (m, 7H), 7.87-7.90 (m, 3H). Other peaks are overlapped with those of a major isomer.

$^{13}\text{C}$  NMR ( $\text{CDCl}_3$ , 101 MHz)  $\delta$ : 54.01, 125.24 (q,  $J = 3.8$  Hz), 126.30, 126.69, 127.50, 128.35, 128.74, 129.33, 129.40, 131.60. Other peaks are overlapped with those of a major isomer.

*E/Z Mixture*

$^{19}\text{F}$  NMR ( $\text{CDCl}_3$ , 376 MHz)  $\delta$ : -64.17, -63.84.

IR (KBr): 3058 m, 3032 m, 1663 s, 1627 s, 1598 s, 1510 s, 1464 s, 1408 s, 1324 s, 1243 m, 1163 s, 1123 s, 1067 s, 1017 s, 984 m, 958 m, 942 m, 843 s, 811 m, 744 s, 697 s, 616 m.

MS,  $m/z$  (relative intensity, %): 405 ( $\text{M}^+$ , 3), 262 (11), 91 (100).

HRMS (DART+,  $[\text{M}+\text{H}]^+$ ) Calcd for  $\text{C}_{25}\text{H}_{19}\text{F}_3\text{NO}$ : 406.1413. Found: 406.1420.

#### Naphthalen-2-yl *N*-benzyl-4-methoxybenzimidate (1aac).

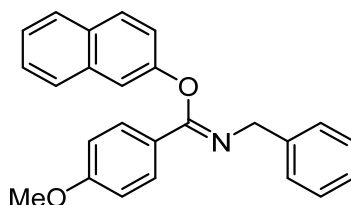

The product was obtained as a mixture of geometrical isomers ( $E:Z = 1:20$ ), which was determined by  $^1\text{H}$  NMR.

White solid (853 mg, 23%).  $R_f$  0.64 ( $\text{SiO}_2$ , Hexane/EtOAc = 1/1). Mp 71.5-73.2 °C.

*Major isomer*

$^1\text{H}$  NMR ( $\text{CDCl}_3$ , 400 MHz)  $\delta$ : 3.74 (s, 3H), 4.74 (s, 2H), 6.79-6.83 (m, 2H), 7.15 (d,  $J = 2.3$  Hz, 1H), 7.20-7.25 (m, 2H), 7.29-7.42 (m, 6H), 7.60 (d,  $J = 7.8$  Hz, 1H), 7.75-7.79 (m, 2H), 7.87-7.90 (m, 2H).

$^{13}\text{C}$  NMR ( $\text{CDCl}_3$ , 101 MHz)  $\delta$ : 51.76, 55.22, 100.77, 113.74, 117.64, 124.46, 124.95, 126.60, 126.67, 126.90, 127.67, 127.79, 128.31, 129.58, 130.20, 130.39, 134.19, 139.93, 153.25, 153.49, 161.72.

*Minor isomer*

$^1\text{H}$  NMR ( $\text{CDCl}_3$ , 400 MHz)  $\delta$ : 2.83 (s, 3H), 4.66 (s, 2H), 8.18-8.22 (m, 2H). Other peaks are overlapped with those of a major isomer.

$^{13}\text{C}$  NMR ( $\text{CDCl}_3$ , 101 MHz) Peaks are not clearly observed.

*E/Z Mixture*

IR (KBr): 2359 w, 1698 m, 1683 m, 1652 s, 1636 m, 1558 s, 1540 s, 1515 m, 1507 s, 1456 s, 1261 m, 1243 s, 1160 m, 1051 m, 1024 m, 837 m, 757 m, 700 m, 607 w, 582 w.

MS,  $m/z$  (relative intensity, %): 367 ( $\text{M}^+$ , 18), 232 (14), 135 (100), 107 (10), 92 (10), 91 (48), 77 (16).

HRMS (DART+,  $[\text{M}+\text{H}]^+$ ) Calcd for  $\text{C}_{25}\text{H}_{22}\text{NO}_2$ : 368.1645. Found: 368.1647.

#### Naphthalen-2-yl *N*-benzyl-3,5-dimethylbenzimidate (1aad).

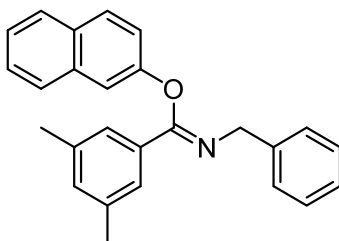

The product was obtained as a mixture of geometrical isomers ( $E:Z = 1:13$ ), which was determined by  $^1\text{H}$  NMR.

Colorless oil (638 mg, 54%).  $R_f$  0.68 ( $\text{SiO}_2$ , Hexane/EtOAc = 1/1).

*Major isomer*

$^1\text{H}$  NMR ( $\text{CDCl}_3$ , 400 MHz)  $\delta$ : 2.38 (s, 6H), 4.90 (s, 2H), 7.13 (s, 1H), 7.29-7.55 (m, 9H), 7.73-7.74 (m, 3H), 7.86-7.92 (m, 2H).

$^{13}\text{C}$  NMR ( $\text{CDCl}_3$ , 101 MHz)  $\delta$ : 21.16, 51.93, 110.68, 117.63, 124.41, 126.37, 126.62, 126.89, 127.63, 127.81, 128.30, 129.56, 130.19, 132.47, 132.71, 134.16, 137.94, 139.71, 153.18, 154.08.

*Minor isomer*

$^1\text{H}$  NMR ( $\text{CDCl}_3$ , 400 MHz)  $\delta$ : 2.50 (s, 6H), 4.75 (s, 2H), 7.23 (s, 1H), 7.58-7.61 (m, 2H). Other peaks are overlapped with those of a major isomer.

$^{13}\text{C}$  NMR ( $\text{CDCl}_3$ , 101 MHz)  $\delta$ : 21.26, 53.60, 118.42, 122.59, 125.01, 125.84, 126.06, 126.27, 126.81, 127.44, 128.12, 128.74, 130.84, 130.97, 131.70, 134.06, 138.15, 140.75, 151.16, 161.44. Other peaks are overlapped with those of a major isomer.

*E/Z Mixture*

IR (KBr): 3058 w, 3028 w, 2915 w, 1660 s, 1629 s, 1599 s, 1509 m, 1463 m, 1317 m, 1246 m, 1211 s, 1185 s, 1161 s, 1087 s, 1027 m, 962 m, 845 m, 809 m, 746 m, 697 m.

MS,  $m/z$  (relative intensity, %): 365 ( $\text{M}^+$ , 24), 232 (25), 222 (21), 133 (81), 105 (31), 92 (10), 91 (100), 79 (12), 77 (11), 65 (10).

HRMS (DART+,  $[\text{M}+\text{H}]^+$ ) Calcd for  $\text{C}_{26}\text{H}_{24}\text{NO}$ : 366.1852. Found: 366.1862.

**Naphthalen-2-yl *N*-benzyl-3,5-bis(trifluoromethyl)benzimidate (1aae).**

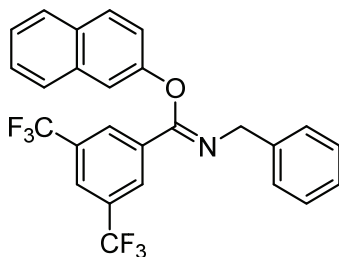

The product was obtained as a mixture of geometrical isomers ( $E:Z = 1:37$ ), which was determined by  $^1\text{H}$  NMR.

Yellow oil (118 mg, 8%).  $R_f$  0.72 (NH silica, Hexane/EtOAc = 1/1).

*Major isomer*

$^1\text{H}$  NMR ( $\text{CDCl}_3$ , 400 MHz)  $\delta$ : 4.77 (s, 2H), 7.13 (d,  $J = 2.3$  Hz, 1H), 7.28-7.48 (m, 8H), 7.64 (d,  $J = 8.2$  Hz, 1H), 7.82 (d,  $J = 8.2$  Hz, 1H), 7.87 (d,  $J = 9.2$  Hz, 1H), 7.90 (s, 1H), 8.41 (s, 2H).

$^{13}\text{C}$  NMR ( $\text{CDCl}_3$ , 101 MHz)  $\delta$ : 52.48, 110.89, 117.27, 122.95 (q,  $J = 273.2$  Hz), 124.41 (m,  $J = 3.4$  Hz), 125.06, 126.98, 127.09, 127.83, 127.89, 128.53, 128.63 (q,  $J = 2.9$  Hz), 130.01, 130.89, 132.01 (q,  $J = 33.6$  Hz), 134.05, 135.22, 138.77, 150.93, 152.30.

*Minor isomer*

$^1\text{H}$  NMR ( $\text{CDCl}_3$ , 400 MHz)  $\delta$ : 4.56 (s, 2H), 8.03 (br, 4H). Other peaks are overlapped with those of a major isomer.

$^{13}\text{C}$  NMR ( $\text{CDCl}_3$ , 101 MHz) Peaks were not observed due to low concentration of the minor isomer.

*E/Z Mixture*

$^{19}\text{F}$  NMR ( $\text{CDCl}_3$ , 376 MHz)  $\delta$ : -64.17.

IR (KBr): 3062 m, 3026 w, 1811 w, 1667 s, 1629 s, 1600 s, 1512 s, 1496 m, 1458 s, 1414 w, 1385 s, 1352 m, 1279 s, 1233 m, 1209 m, 1165 s, 1133 s, 1014 m, 960 m, 909 m, 835 m, 810 m, 729 m, 694 s, 682 s.

MS,  $m/z$  (relative intensity, %): 473 ( $\text{M}^+$ , 1), 330 (50), 227 (100), 115 (27).

HRMS (DART+,  $[\text{M}+\text{H}]^+$ ) Calcd for  $\text{C}_{26}\text{H}_{18}\text{F}_6\text{NO}$ : 474.1287. Found: 474.1289.

**Naphthalen-2-yl *N*-benzyl-3,5-di-*tert*-butylbenzimidate (1aaf).**

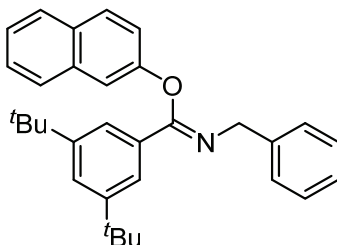

The product was obtained as a mixture of geometrical isomers ( $E:Z = 1:7.0$ ), which was determined by  $^1\text{H}$  NMR.

White solid (499 mg, 12%).  $R_f$  0.70 (NH silica, Hexane/EtOAc = 1/1). Mp 91.8-92.8 °C.

*Major isomer*

$^1\text{H}$  NMR ( $\text{CDCl}_3$ , 400 MHz)  $\delta$ : 1.25 (s, 18H), 4.80 (s, 2H), 7.17-7.45 (m, 10H), 7.61 (d,  $J = 8.2$  Hz, 1H), 7.74-7.78 (m, 4H).

$^{13}\text{C}$  NMR ( $\text{CDCl}_3$ , 101 MHz)  $\delta$ : 31.29, 34.80, 51.89, 111.37, 117.98, 123.05, 124.42, 125.04, 126.56, 126.79, 126.95, 127.66, 127.79, 128.29, 129.63, 130.09, 131.85, 134.20, 139.97, 150.76, 153.32, 154.65.

*Minor isomer*

$^1\text{H}$  NMR ( $\text{CDCl}_3$ , 400 MHz)  $\delta$ : 1.33 (s, 18H), 4.61 (s, 2H), 7.47-7.50 (m, 2H), 7.54-7.55 (m, 1H), 7.71-7.72 (m, 1H), 7.82-7.90 (m, 4H). Other peaks are overlapped with those of a major isomer.

$^{13}\text{C}$  NMR ( $\text{CDCl}_3$ , 101 MHz)  $\delta$ : 31.34, 34.92, 53.67, 118.55, 121.45, 122.38, 122.74, 123.32, 124.21, 125.62, 126.10, 126.28, 127.50, 127.71, 128.78, 129.36, 131.03, 134.12, 140.89, 151.05, 151.27, 162.41.

*E/Z Mixture*

IR (KBr): 2965 s, 2911 s, 2866 m, 1665 s, 1627 s, 1597 s, 1508 s, 1460 s, 1450 m, 1361 s, 1318 m, 1242 s, 1206 s, 1160 s, 1093 s, 1009 m, 963 m, 885 m, 809 m, 750 m, 734 s, 705 m.

MS,  $m/z$  (relative intensity, %): 449 ( $\text{M}^+$ , 20), 306 (11), 232 (32), 218 (13), 217 (71), 133 (17), 91 (100), 57 (26).

HRMS (DART+,  $[\text{M}+\text{H}]^+$ ) Calcd for  $\text{C}_{32}\text{H}_{36}\text{NO}$ : 450.2791. Found: 450.2792.

**Naphthalen-2-yl 3,5-dimethyl-*N*-(4-(trifluoromethyl)benzyl)benzimidate (1abd).**

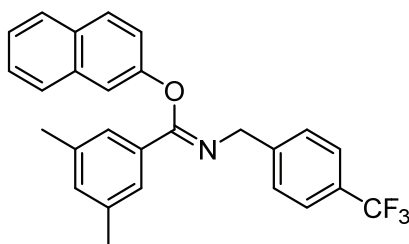

The product was obtained as a mixture of geometrical isomers ( $E:Z = 1:9.5$ ), which was determined by  $^1\text{H}$  NMR.

White solid (1.10 g, 50%).  $R_f$  0.68 (NH silica, Hexane/EtOAc = 1/1). Mp 108.2-109.1  $^\circ\text{C}$ .

*Major isomer*

$^1\text{H}$  NMR ( $\text{CDCl}_3$ , 400 MHz)  $\delta$ : 2.28 (s, 6H), 4.78 (s, 2H), 7.04 (s, 1H), 7.13 (m, 1H), 7.19-7.24 (m, 1H), 7.24-7.27 (m, 1H), 7.35-7.44 (m, 2H), 7.50-7.52 (m, 2H), 7.56-7.58 (m, 4H), 7.62 (d,  $J = 8.2$  Hz, 1H), 7.77-7.82 (m, 2H).

$^{13}\text{C}$  NMR ( $\text{CDCl}_3$ , 101 MHz)  $\delta$ : 21.22, 51.43, 110.79, 117.60, 124.62, 124.29 (q,  $J = 271.3$  Hz), 124.62, 125.25 (q,  $J = 3.8$  Hz), 126.41, 126.77, 126.93, 127.71, 128.01, 128.91 (q,  $J = 32.3$  Hz), 129.68, 130.35, 132.23, 133.02, 134.16, 138.14, 143.87, 153.06.

*Minor isomer*

$^1\text{H}$  NMR ( $\text{CDCl}_3$ , 400 MHz)  $\delta$ : 2.39 (s, 6H), 4.63 (s, 2H), 7.19 (s, 2H), 7.46 (d,  $J = 1.8$  Hz, 1H), 7.48 (s, 2H), 7.66 (m, 2H), 7.85-7.89 (m, 3H). Other peaks are overlapped with those of a major isomer.

$^{13}\text{C}$  NMR ( $\text{CDCl}_3$ , 101 MHz)  $\delta$ : 21.33, 53.19, 118.54, 122.52, 125.08 (q,  $J = 3.8$  Hz), 125.80, 126.26, 127.03, 127.50, 127.76, 128.88, 130.68, 131.09, 131.97, 134.08, 138.37, 144.93, 151.07, 154.94, 162.14. Other peaks are overlapped with those of a major isomer.

*E/Z Mixture*



$^{19}\text{F}$  NMR ( $\text{CDCl}_3$ , 376 MHz)  $\delta$ : -63.62.

IR (KBr): 2898 m, 1663 s, 1628 s, 1598 s, 1511 s, 1464 m, 1418 m, 1324 s, 1247 m, 1159 s, 1118 m, 1087 s, 1066 s, 961 m, 915 m, 840 s, 746 s, 732 s, 691 m.

MS,  $m/z$  (relative intensity, %): 433 ( $\text{M}^+$ , 4), 290 (22), 159 (100), 133 (41), 115 (17), 109 (13), 105 (12).

HRMS (DART+,  $[\text{M}+\text{H}]^+$ ) Calcd for  $\text{C}_{27}\text{H}_{23}\text{F}_3\text{NO}$ : 434.1726. Found: 434.1729.

**Naphthalen-1-yl 3,5-dimethyl-*N*-(4-(trifluoromethyl)benzyl)benzimidate (1bbd).**

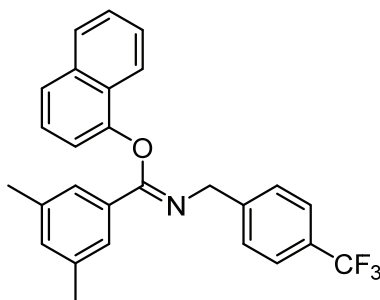

The product was obtained as a mixture of geometrical isomers ( $E:Z = 1:10$ ), which was determined by  $^1\text{H}$  NMR.

Yellow oil (149 mg, 8%).  $R_f$  0.66 (NH silica, Hexane/EtOAc = 1/1).

*Major isomer*

$^1\text{H}$  NMR ( $\text{CDCl}_3$ , 400 MHz)  $\delta$ : 2.25 (s, 6H), 4.77 (s, 2H), 6.64 (d,  $J = 7.8$  Hz, 1H), 7.05 (s, 1H), 7.19-7.24 (m, 1H), 7.49-7.62 (m, 9H), 7.87-7.89 (m, 1H), 8.42 (d,  $J = 7.8$  Hz, 1H).

$^{13}\text{C}$  NMR ( $\text{CDCl}_3$ , 101 MHz)  $\delta$ : 21.20, 51.30, 109.02, 121.54, 122.47, 124.30 (q,  $J = 271.9$  Hz), 124.52, 125.26 (q,  $J = 3.8$  Hz), 125.66, 126.10, 126.13, 126.88, 127.86, 128.04, 128.91 (q,  $J = 32.3$  Hz), 133.11, 134.90, 138.16, 143.85, 150.77.

*Minor isomer*

$^1\text{H}$  NMR ( $\text{CDCl}_3$ , 400 MHz)  $\delta$ : 2.42 (s, 6H), 4.59 (s, 2H), 7.28 (s, 1H), 7.38 (d,  $J = 7.8$  Hz, 2H), 7.64 (m, 2H). Other peaks are overlapped with those of a major isomer.

$^{13}\text{C}$  NMR ( $\text{CDCl}_3$ , 101 MHz)  $\delta$ : 21.38, 52.99, 118.47, 122.07, 124.89 (q,  $J = 3.8$  Hz), 125.48, 125.78, 125.92, 126.44, 126.84, 127.64, 132.06, 132.21, 138.45, 155.28. Other peaks are overlapped with those of a major isomer.

*E/Z Mixture*

$^{19}\text{F}$  NMR ( $\text{CDCl}_3$ , 376 MHz)  $\delta$ : -63.56.

IR (KBr): 3053 w, 2918 w, 1738 w, 1661 m, 1618 m, 1577 w, 1507 w, 1461 w, 1392 m, 1324 s, 1233 m, 1162 s, 1123 s, 1094 s, 1066 s, 1018 m, 857 w, 820 m, 791 m, 779 m, 769 m.

MS,  $m/z$  (relative intensity, %): 433 ( $\text{M}^+$ , 1), 290 (30), 159 (100), 133 (19), 115 (14), 109 (12).

HRMS (DART+,  $[\text{M}+\text{H}]^+$ ) Calcd for  $\text{C}_{27}\text{H}_{23}\text{F}_3\text{NO}$ : 434.1726. Found: 434.1733.

**4-Methoxyphenyl 3,5-dimethyl-N-(4-(trifluoromethyl)benzyl)benzimidate (1cbd).**

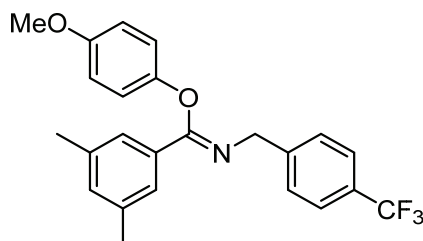

The product was obtained as a mixture of geometrical isomers (*E*:*Z* = 1:4.2), which was determined by  $^1\text{H}$  NMR.

Yellow oil (425 mg, 17%).  $R_f$  0.68 (NH silica, Hexane/EtOAc = 1/1).

*Major isomer*

$^1\text{H}$  NMR ( $\text{CDCl}_3$ , 400 MHz)  $\delta$ : 2.28 (s, 6H), 3.74 (s, 3H), 4.76 (s, 2H), 6.76-6.85 (m, 4H), 7.03 (s, 1H), 7.45 (s, 2H), 7.51-7.60 (m, 4H).

$^{13}\text{C}$  NMR ( $\text{CDCl}_3$ , 101 MHz)  $\delta$ : 21.22, 51.27, 55.57, 114.87, 117.18, 124.31 (q,  $J = 271.9$  Hz), 125.23 (q,  $J = 3.8$  Hz), 126.48, 128.00, 128.81 (q,  $J = 32.6$  Hz), 132.57, 132.65, 137.96, 144.13, 149.23, 155.00, 155.51.

*Minor isomer*

$^1\text{H}$  NMR ( $\text{CDCl}_3$ , 400 MHz)  $\delta$ : 2.37 (s, 6H), 3.82 (s, 3H), 4.60 (s, 2H), 6.92-6.95 (m, 2H), 7.12 (s, 3H), 7.14-7.17 (m, 2H), 7.27 (d,  $J = 7.8$  Hz, 2H).

$^{13}\text{C}$  NMR ( $\text{CDCl}_3$ , 101 MHz)  $\delta$ : 21.31, 53.11, 55.52, 114.25, 122.97, 125.06 (q,  $J = 3.8$  Hz), 125.69, 126.96, 130.81, 131.81, 138.30, 145.13, 146.71, 156.50, 162.47. Other peaks are overlapped with those of a major isomer.

*E/Z Mixture*

$^{19}\text{F}$  NMR ( $\text{CDCl}_3$ , 376 MHz)  $\delta$ : -63.56 (s, 1F).

IR (KBr): 2916 w, 1733 w, 1654 m, 1606 w, 1504 s, 1456 w, 1418 w, 1324 s, 1246 w, 1178 s, 1122 m, 1066 m, 1036 w, 1018 w, 821 m, 778 w.

MS,  $m/z$  (relative intensity, %): 413 ( $\text{M}^+$ , 1), 291 (11), 290 (55), 160 (28), 159 (100), 123 (28), 109 (29), 95 (13).

HRMS (DART+,  $[\text{M}+\text{H}]^+$ ) Calcd for  $\text{C}_{24}\text{H}_{23}\text{F}_3\text{NO}_2$ : 414.1675. Found: 414.1665.

**4-(Dimethylamino)phenyl 3,5-dimethyl-N-(4-(trifluoromethyl)benzyl)benzimidate (1dbd).**

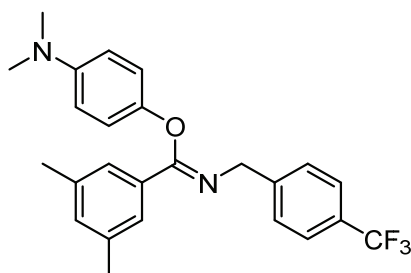

The product was obtained as a mixture of geometrical isomers ( $E:Z = 1:4.5$ ), which was determined by  $^1\text{H}$  NMR.

Yellow oil (397 mg, 12%).  $R_f$  0.76 (NH silica, Hexane/EtOAc = 1/1).

*Major isomer*

$^1\text{H}$  NMR ( $\text{CDCl}_3$ , 400 MHz)  $\delta$ : 2.28 (s, 6H), 2.87 (s, 6H), 4.76 (s, 2H), 6.62–6.66 (m, 2H), 6.80–6.83 (m, 2H), 7.02 (s, 1H), 7.46 (s, 2H), 7.52 (d,  $J = 8.2$  Hz, 2H), 7.58 (d,  $J = 8.2$  Hz, 2H).

$^{13}\text{C}$  NMR ( $\text{CDCl}_3$ , 101 MHz)  $\delta$ : 21.22, 41.20, 51.25, 114.09, 117.05, 124.33 (q,  $J = 271.6$  Hz), 125.19 (q,  $J = 3.8$  Hz), 126.49, 128.01, 128.72 (q,  $J = 32.6$  Hz), 132.50, 132.88, 137.85, 144.33, 146.72, 147.00, 155.91.

*Minor isomer*

$^1\text{H}$  NMR ( $\text{CDCl}_3$ , 400 MHz)  $\delta$ : 2.36 (s, 6H), 2.95 (s, 6H), 4.60 (s, 2H), 6.76–6.79 (m, 2H), 6.91 (s, 1H), 7.06–7.08 (m, 2H), 7.11 (s, 3H), 7.17 (d,  $J = 8.2$  Hz, 1H), 7.29 (d,  $J = 7.8$  Hz, 2H).

$^{13}\text{C}$  NMR ( $\text{CDCl}_3$ , 101 MHz)  $\delta$ : 21.31, 41.09, 53.14, 113.26, 122.47, 125.01 (q,  $J = 3.8$  Hz), 125.67, 126.98, 131.66, 138.21, 144.11, 148.05. Other peaks are overlapped with those of a major isomer.

*E/Z Mixture*

$^{19}\text{F}$  NMR ( $\text{CDCl}_3$ , 376 MHz)  $\delta$ : -63.53.

IR (KBr): 2918 s, 2802 m, 1733 s, 1669 m, 1653 s, 1616 s, 1608 s, 1516 s, 1508 s, 1324 s, 1202 s, 1162 s, 1123 s, 1066 m, 850 m, 820 m.

MS,  $m/z$  (relative intensity, %): 426 ( $\text{M}^+$ , 9), 291 (11), 290 (55), 160 (11), 159 (100), 136 (42), 109 (13).

HRMS (DART+,  $[\text{M}+\text{H}]^+$ ) Calcd for  $\text{C}_{25}\text{H}_{26}\text{F}_3\text{N}_2\text{O}$ : 427.1992. Found: 427.1997.

**[1,1'-Biphenyl]-4-yl 3,5-dimethyl-*N*-(4-(trifluoromethyl)benzyl)benzimidate (1ebd).**

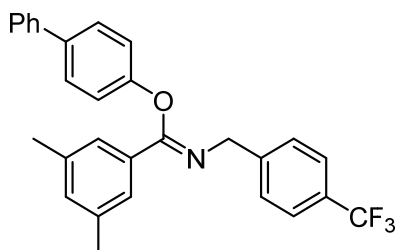

The product was obtained as a mixture of geometrical isomers ( $E:Z = 1:9.1$ ), which was determined

by  $^1\text{H}$  NMR.

Yellow oil (188 mg, 10%).  $R_f$  0.67 (NH silica, Hexane/EtOAc = 1/1).

*Major isomer*

$^1\text{H}$  NMR ( $\text{CDCl}_3$ , 400 MHz)  $\delta$ : 2.29 (s, 6H), 4.78 (s, 2H), 6.96-7.00 (m, 2H), 7.06 (s, 1H), 7.30-7.33 (m, 1H), 7.38-7.42 (m, 2H), 7.47-7.48 (m, 1H), 7.49-7.50 (m, 2H), 7.51-7.53 (m, 5H), 7.58-7.60 (m, 2H).

$^{13}\text{C}$  NMR ( $\text{CDCl}_3$ , 101 MHz)  $\delta$ : 21.22, 51.37, 116.34, 122.48, 124.30 (q,  $J = 272.0$  Hz), 125.25 (q,  $J = 3.5$  Hz), 126.41, 126.74, 127.06, 128.00, 128.59, 128.76, 128.89 (q,  $J = 32.3$  Hz), 132.35, 132.93, 135.73, 138.11, 140.17, 143.91, 154.85.

*Minor isomer*

$^1\text{H}$  NMR ( $\text{CDCl}_3$ , 400 MHz)  $\delta$ : 2.38 (s, 6H), 4.64 (s, 2H), 7.14 (s, 1H), 7.16 (s, 2H), 7.27-7.29 (m, 4H), 7.61-7.62 (m, 4H), 7.64 (s, 2H). Other peaks are overlapped with those of a major isomer.

$^{13}\text{C}$  NMR ( $\text{CDCl}_3$ , 101 MHz)  $\delta$ : 21.31, 53.21, 121.99, 125.10 (q,  $J = 3.8$  Hz), 125.74, 127.10, 127.30, 127.89, 127.94, 130.68, 131.93, 137.83, 138.35, 152.78. Other peaks are overlapped with those of a major isomer.

*E/Z Mixture*

$^{19}\text{F}$  NMR ( $\text{CDCl}_3$ , 376 MHz)  $\delta$ : -63.53.

IR (KBr): 3057 m, 3032 s, 2918 s, 1661 s, 1605 s, 1513 s, 1485 s, 1450 m, 1417 s, 1325 s, 1216 s, 1169 s, 1123 s, 1066 s, 1018 s, 821 s, 761 s, 697 s.

MS,  $m/z$  (relative intensity, %): 459 ( $\text{M}^+$ , 7), 290 (30), 159 (100), 133 (74), 109 (11), 105 (21).

HRMS (DART+,  $[\text{M}+\text{H}]^+$ ) Calcd for  $\text{C}_{29}\text{H}_{25}\text{F}_3\text{NO}$ : 460.1883. Found: 460.1889.

**4-Fluorophenyl 3,5-dimethyl-*N*-(4-(trifluoromethyl)benzyl)benzimidate (1fbd).**

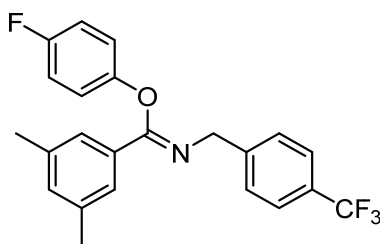

The product was obtained as a mixture of geometrical isomers ( $E:Z = 1:4.8$ ), which was determined by  $^1\text{H}$  NMR.

Yellow oil (2.06 g, 85%).  $R_f$  0.74 (NH silica, Hexane/EtOAc = 1/1).

*Major isomer*

$^1\text{H}$  NMR ( $\text{CDCl}_3$ , 400 MHz)  $\delta$ : 2.28 (s, 6H), 4.75 (s, 2H), 6.83-6.87 (m, 2H), 6.91-6.97 (m, 2H), 7.05 (s, 1H), 7.44 (s, 2H), 7.51 (d,  $J = 7.8$  Hz, 2H), 7.59 (d,  $J = 8.2$  Hz, 2H).

$^{13}\text{C}$  NMR ( $\text{CDCl}_3$ , 101 MHz)  $\delta$ : 21.19, 51.27, 116.44 (d,  $J = 23.0$  Hz), 117.35 (d,  $J = 8.6$  Hz), 124.28

(q,  $J = 271.9$  Hz), 125.27 (q,  $J = 3.8$  Hz), 126.45, 127.98, 128.94 (q,  $J = 32.3$  Hz), 132.12, 132.88, 138.12, 143.83, 151.33 (d,  $J = 1.9$  Hz), 154.96, 158.20 (d,  $J = 241.5$  Hz).

*Minor isomer*

$^1\text{H}$  NMR ( $\text{CDCl}_3$ , 400 MHz)  $\delta$ : 2.38 (s, 6H), 4.60 (s, 2H), 7.06–7.11 (m, 2H), 7.13 (s, 3H), 7.17–7.20 (m, 2H), 7.26 (d,  $J = 7.8$  Hz, 2H). Other peaks are overlapped with those of a major isomer.

$^{13}\text{C}$  NMR ( $\text{CDCl}_3$ , 101 MHz)  $\delta$ : 21.29, 53.07, 115.81 (d,  $J = 23.0$  Hz), 123.57 (d,  $J = 8.6$  Hz), 125.11 (q,  $J = 3.8$  Hz), 125.69, 126.97, 130.49, 131.99, 138.37, 143.86, 149.07 (d,  $J = 2.9$  Hz), 159.66 (d,  $J = 242.5$  Hz), 161.98. Other peaks are overlapped with those of a major isomer.

*E/Z Mixture*

$^{19}\text{F}$  NMR ( $\text{CDCl}_3$ , 376 MHz)  $\delta$ : -122.19 (s, 1F, *major isomer*), -119.64 (s, 1F, *minor isomer*), -63.59 (s, 3F, major/minor isomers overlapped).

IR (KBr): 2916 m, 1666 s, 1618 s, 1606 s, 1505 s, 1419 s, 1331 s, 1318 s, 1288 m, 1186 s, 1159 s, 1120 s, 1067 s, 1038 m, 903 m, 864 s, 830 s, 782 s, 739 m, 696 m, 671 s.

MS,  $m/z$  (relative intensity, %): 401 ( $\text{M}^+$ , 1), 291 (16), 290 (76), 160 (18), 159 (100), 133 (16), 116 (11), 109 (35).

HRMS (DART+,  $[\text{M}+\text{H}]^+$ ) Calcd for  $\text{C}_{23}\text{H}_{20}\text{F}_4\text{NO}$ : 402.1476. Found: 402.1478.

**4-Acetylphenyl 3,5-dimethyl-*N*-(4-(trifluoromethyl)benzyl)benzimidate (1gbd).**

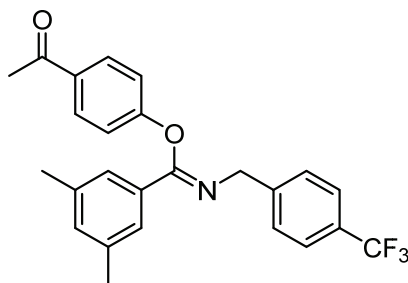

The product was obtained as a mixture of geometrical isomers ( $E:Z = 1:13$ ), which was determined by  $^1\text{H}$  NMR.

White solid (1.63 g, 63%).  $R_f$  0.60 (NH silica, Hexane/EtOAc = 1/1). Mp 91.1–91.8 °C.

*Major isomer*

$^1\text{H}$  NMR ( $\text{CDCl}_3$ , 400 MHz)  $\delta$ : 2.30 (s, 6H), 2.55 (s, 3H), 4.73 (s, 2H), 6.95–6.98 (m, 2H), 7.08 (s, 1H), 7.47 (s, 2H), 7.51 (d,  $J = 8.2$  Hz, 2H), 7.59 (d,  $J = 8.2$  Hz, 2H), 7.90–7.93 (m, 2H).

$^{13}\text{C}$  NMR ( $\text{CDCl}_3$ , 101 MHz)  $\delta$ : 21.22, 26.42, 51.38, 115.77, 124.23 (q,  $J = 272.2$  Hz), 125.31 (q,  $J = 3.8$  Hz), 126.25, 127.94, 129.03 (q,  $J = 32.3$  Hz), 130.93, 131.71, 131.96, 133.24, 138.29, 143.47, 153.82, 159.03, 196.55.

*Minor isomer*

$^1\text{H}$  NMR ( $\text{CDCl}_3$ , 400 MHz)  $\delta$ : 2.39 (s, 6H), 2.62 (s, 3H), 4.63 (s, 2H), 7.15 (s, 3H), 7.32–7.34 (m, 2H), 8.03–8.05 (m, 2H). Other peaks are overlapped with those of a major isomer.

$^{13}\text{C}$  NMR ( $\text{CDCl}_3$ , 101 MHz)  $\delta$ : 21.32, 26.61, 122.30, 125.72, 127.03, 129.87, 132.17, 133.77, 138.46.

Other peaks are overlapped with those of a major isomer.

*E/Z Mixture*

$^{19}\text{F}$  NMR ( $\text{CDCl}_3$ , 376 MHz)  $\delta$ : -63.62.

IR (KBr): 3002 m, 2918 m, 1659 s, 1649 s, 1599 s, 1584 s, 1504 s, 1418 s, 1358 m, 1327 s, 1227 m, 1160 m, 1121 m, 1088 m, 1019 m, 912 m, 847 s, 828 s, 817 s, 719 m, 686 m, 592 s.

MS,  $m/z$  (relative intensity, %): 425 ( $\text{M}^+$ , 9), 134 (10), 133 (100), 105 (24).

HRMS (DART+,  $[\text{M}+\text{H}]^+$ ) Calcd for  $\text{C}_{25}\text{H}_{23}\text{F}_3\text{NO}_2$ : 426.1675. Found: 426.1685.

**4-Formylphenyl 3,5-dimethyl-*N*-(4-(trifluoromethyl)benzyl)benzimidate (1hbd).**

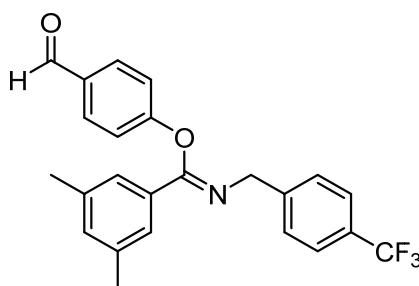

The product was obtained as a mixture of geometrical isomers ( $E:Z = 1:12$ ), which was determined by  $^1\text{H}$  NMR.

White solid (1.86 g, 75%).  $R_f$  0.64 ( $\text{SiO}_2$ , Hexane/EtOAc = 1/1). Mp 99.9-101.0 °C.

*Major isomer*

$^1\text{H}$  NMR ( $\text{CDCl}_3$ , 400 MHz)  $\delta$ : 2.30 (s, 6H), 4.74 (s, 2H), 7.04 (d,  $J = 8.7$  Hz, 2H), 7.09 (s, 1H), 7.48 (s, 2H), 7.51 (d,  $J = 8.2$  Hz, 2H), 7.59 (d,  $J = 8.2$  Hz, 2H), 7.81-7.85 (m, 2H), 9.90 (s, 1H).

$^{13}\text{C}$  NMR ( $\text{CDCl}_3$ , 101 MHz)  $\delta$ : 21.22, 51.34, 116.41, 122.88, 124.21 (q,  $J = 271.9$  Hz), 125.35 (q,  $J = 3.8$  Hz), 126.29, 127.97, 129.14 (q,  $J = 32.6$  Hz), 131.16, 131.49, 132.27, 133.43, 138.39, 143.25, 160.00, 190.50.

*Minor isomer*

$^1\text{H}$  NMR ( $\text{CDCl}_3$ , 400 MHz)  $\delta$ : 2.39 (s, 6H), 4.64 (s, 2H), 7.16 (s, 3H), 7.41 (d,  $J = 8.2$  Hz, 2H), 7.94-7.96 (m, 2H), 10.01 (s, 1H). Other peaks are overlapped with those of a major isomer.

$^{13}\text{C}$  NMR ( $\text{CDCl}_3$ , 101 MHz)  $\delta$ : 21.32, 53.22, 125.35 (q,  $J = 3.8$  Hz), 125.74, 127.06, 133.13, 138.51, 191.14. Other peaks are overlapped with those of a major isomer.

*E/Z Mixture*

$^{19}\text{F}$  NMR ( $\text{CDCl}_3$ , 376 MHz)  $\delta$ : -63.65.

IR (KBr): 2918 w, 2839 w, 1698 s, 1668 s, 1599 s, 1505 s, 1419 m, 1324 s, 1239 m, 1156 m, 1115 m, 1082 m, 943 m, 903 m, 824 s, 768 m, 719 m, 597 m, 501 m.

MS,  $m/z$  (relative intensity, %): 411 ( $\text{M}^+$ , 11), 134 (17), 133 (100), 105 (40), 79 (15), 77 (14).

HRMS (DART+, [M+H]<sup>+</sup>) Calcd for C<sub>24</sub>H<sub>21</sub>F<sub>3</sub>NO<sub>2</sub>: 412.1519. Found: 412.1525.

**Benzo[d][1,3]dioxol-5-yl 3,5-dimethyl-N-(4-(trifluoromethyl)benzyl)benzimidate (1ibd).**

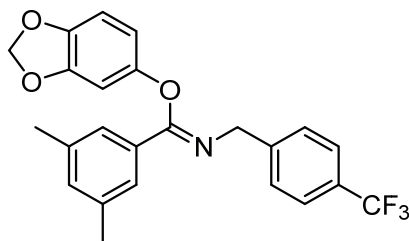

The product was obtained as a mixture of geometrical isomers (*E*:*Z* = 1:4.6), which was determined by <sup>1</sup>H NMR.

Yellow oil (674 mg, 27%). R<sub>f</sub> 0.70 (NH silica, Hexane/EtOAc = 1/1).

*Major isomer*

<sup>1</sup>H NMR (CDCl<sub>3</sub>, 400 MHz) δ: 2.29 (s, 6H), 4.77 (s, 2H), 5.93 (s, 2H), 6.30 (dd, *J* = 8.2, 2.3 Hz, 1H), 6.49 (d, *J* = 2.3 Hz, 1H), 6.64 (d, *J* = 8.7 Hz, 1H), 7.05 (s, 1H), 7.45 (s, 2H), 7.53 (d, *J* = 8.2 Hz, 2H), 7.59 (d, *J* = 8.2 Hz, 2H).

<sup>13</sup>C NMR (CDCl<sub>3</sub>, 101 MHz) δ: 21.24, 51.27, 99.09, 101.51, 108.05, 108.25, 124.30 (q, *J* = 272.2 Hz), 125.26 (q, *J* = 3.8 Hz), 126.42, 127.99, 128.87 (q, *J* = 32.3 Hz), 132.42, 132.78, 138.03, 143.03, 144.02, 148.52, 150.30, 155.16.

*Minor isomer*

<sup>1</sup>H NMR (CDCl<sub>3</sub>, 400 MHz) δ: 2.37 (s, 6H), 4.61 (s, 2H), 5.99 (s, 2H), 6.67 (dd, *J* = 8.2, 2.3 Hz, 1H), 6.77 (d, *J* = 2.3 Hz, 1H), 6.82 (d, *J* = 8.2 Hz, 1H), 7.10-7.13 (m, 3H), 7.29 (d, *J* = 8.2 Hz, 2H). Other peaks are overlapped with those of a major isomer.

<sup>13</sup>C NMR (CDCl<sub>3</sub>, 101 MHz) δ: 21.31, 53.15, 104.48, 107.91, 114.40, 125.11 (q, *J* = 3.8 Hz), 125.67, 126.97, 130.61, 131.89, 138.33, 144.60, 144.99, 147.63, 147.86, 162.48. Other peaks are overlapped with those of a major isomer.

*E/Z Mixture*

<sup>19</sup>F NMR (CDCl<sub>3</sub>, 376 MHz) δ: -63.59, -63.53.

IR (KBr): 3009 w, 2916 m, 1735 w, 1661 m, 1618 m, 1606 m, 1483 s, 1446 m, 1417 m, 1325 s, 1246 m, 1171 s, 1125 s, 1066 s, 1038 s, 1019 m, 949 m, 932 m, 821 s, 681 w, 595 w.

MS, *m/z* (relative intensity, %): 427 (M<sup>+</sup>, 1), 290 (41), 160 (21), 159 (100), 137 (17), 133 (11), 109 (24), 107 (10), 79 (12).

HRMS (DART+, [M+H]<sup>+</sup>) Calcd for C<sub>24</sub>H<sub>21</sub>F<sub>3</sub>NO<sub>3</sub>: 428.1468. Found: 428.1474.

***o*-Tolyl 3,5-dimethyl-N-(4-(trifluoromethyl)benzyl)benzimidate (1jbd).**

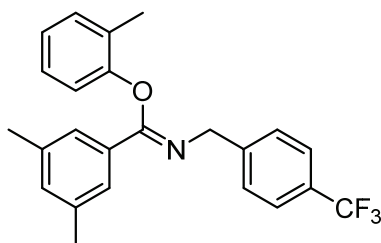

The product was obtained as a mixture of geometrical isomers ( $E:Z = 1:4.3$ ), which was determined by  $^1\text{H}$  NMR.

Pale yellow oil (105 mg, 4%).  $R_f$  0.80 (NH silica, Hexane/EtOAc = 1/1).

*Major isomer*

$^1\text{H}$  NMR ( $\text{CDCl}_3$ , 400 MHz)  $\delta$ : 2.28 (s, 6H), 2.44 (s, 3H), 4.71 (s, 2H), 6.57 (dd,  $J = 7.8, 1.4$  Hz, 1H), 6.91–7.01 (m, 2H), 7.05 (s, 1H), 7.15 (s, 1H), 7.45 (s, 2H), 7.51 (d,  $J = 7.8$  Hz, 2H), 7.58 (d,  $J = 8.2$  Hz, 2H).

$^{13}\text{C}$  NMR ( $\text{CDCl}_3$ , 101 MHz)  $\delta$ : 16.21, 21.23, 51.23, 114.80, 122.65, 124.31 (q,  $J = 271.9$  Hz), 125.24 (q,  $J = 3.8$  Hz), 125.60, 126.19, 126.92, 127.07, 128.02, 128.86 (q,  $J = 32.3$  Hz), 131.52, 132.84, 138.02, 138.35, 144.02, 153.42.

*Minor isomer*

$^1\text{H}$  NMR ( $\text{CDCl}_3$ , 400 MHz)  $\delta$ : 2.29 (s, 3H), 2.39 (s, 6H), 4.58 (s, 2H), 7.27 (d,  $J = 7.3$  Hz, 2H). Other peaks are overlapped with those of a major isomer.

$^{13}\text{C}$  NMR ( $\text{CDCl}_3$ , 101 MHz)  $\delta$ : 16.55, 21.34, 53.06, 122.52, 125.02 (q,  $J = 3.8$  Hz), 126.79, 129.65, 130.69, 130.85, 130.96, 131.85, 132.51, 145.15, 151.74, 155.55, 161.52. Other peaks are overlapped with those of a major isomer.

*E/Z Mixture*

$^{19}\text{F}$  NMR ( $\text{CDCl}_3$ , 376 MHz)  $\delta$ : -63.59, -63.53.

IR (KBr): 2920 w, 1661 m, 1618 w, 1605 w, 1587 w, 1490 m, 1418 w, 1324 s, 1226 m, 1176 s, 1117 s, 1066 m, 1018 w, 820 w, 751 w.

MS,  $m/z$  (relative intensity, %): 397 ( $\text{M}^+$ , 2), 290 (43), 160 (11), 159 (100), 133 (15), 109 (21).

HRMS (DART+,  $[\text{M}+\text{H}]^+$ ) Calcd for  $\text{C}_{24}\text{H}_{23}\text{F}_3\text{NO}$ : 398.1726. Found: 398.1729.

**Quinolin-3-yl 3,5-dimethyl-*N*-(4-(trifluoromethyl)benzyl)benzimidate (1kbd).**

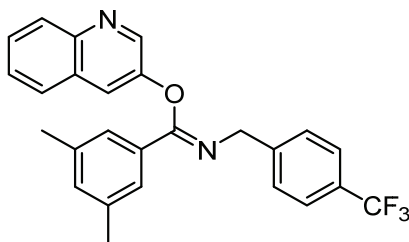



The product was obtained as a mixture of geometrical isomers ( $E:Z = 1:3.1$ ), which was determined by  $^1\text{H}$  NMR.

Brown oil (1.06 g, 40%).  $R_f$  0.64 (NH silica, Hexane/EtOAc = 1/1).

*Major isomer*

$^1\text{H}$  NMR ( $\text{CDCl}_3$ , 400 MHz)  $\delta$ : 2.29 (s, 6H), 4.80 (s, 2H), 7.07 (s, 1H), 7.32 (d,  $J = 2.8$  Hz, 1H), 7.46-7.64 (m, 9H), 8.08 (d,  $J = 8.2$  Hz, 1H), 8.87 (d,  $J = 3.2$  Hz, 1H).

$^{13}\text{C}$  NMR ( $\text{CDCl}_3$ , 101 MHz)  $\delta$ : 21.19, 51.47, 117.58, 124.20 (q,  $J = 271.3$  Hz), 125.31 (q,  $J = 3.8$  Hz), 125.75, 126.38, 126.91, 127.06, 127.52, 127.93, 128.44 (q,  $J = 31.2$  Hz), 129.20, 131.37, 133.32, 138.39, 143.01, 144.39, 147.42, 148.74, 153.77.

*Minor isomer*

$^1\text{H}$  NMR ( $\text{CDCl}_3$ , 400 MHz)  $\delta$ : 2.42 (s, 6H), 4.64 (s, 2H), 7.19 (s, 1H), 7.22 (s, 2H), 7.26-7.28 (m, 2H), 7.68-7.72 (m, 1H), 7.82 (d,  $J = 8.2$  Hz, 1H), 8.00 (d,  $J = 2.3$  Hz, 1H), 8.14 (d,  $J = 8.2$  Hz, 1H), 8.91 (d,  $J = 2.8$  Hz, 1H). Other peaks are overlapped with those of a major isomer.

$^{13}\text{C}$  NMR ( $\text{CDCl}_3$ , 101 MHz)  $\delta$ : 21.32, 53.18, 116.47, 126.06, 127.01, 127.45, 129.98, 132.27, 138.51, 143.39, 144.34, 145.39, 146.74, 161.47. Other peaks are overlapped with those of a major isomer.

*E/Z Mixture*

$^{19}\text{F}$  NMR ( $\text{CDCl}_3$ , 376 MHz)  $\delta$ : -63.62.

IR (KBr): 3055 m, 3010 m, 2919 s, 1737 m, 1668 s, 1603 s, 1497 m, 1464 m, 1418 m, 1324 s, 1269 m, 1162 s, 1123 s, 1066 s, 987 m, 858 s, 820 s, 781 s, 750 s, 612 m.

MS,  $m/z$  (relative intensity, %): 434 ( $\text{M}^+$ , 7), 159 (24), 134 (10), 133 (100), 105 (28), 79 (11).

HRMS (DART+,  $[\text{M}+\text{H}]^+$ ) Calcd for  $\text{C}_{26}\text{H}_{22}\text{F}_3\text{N}_2\text{O}$ : 435.1679. Found: 435.1682.

**9-Methyl-9H-carbazol-2-yl 3,5-dimethyl-N-(4-(trifluoromethyl)benzyl)benzimidate (11bd).**

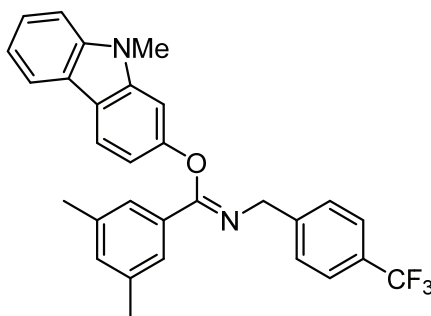

The product was obtained as a mixture of geometrical isomers ( $E:Z = 1:8.5$ ), which was determined by  $^1\text{H}$  NMR.

White solid (1.35 g, 68%).  $R_f$  0.62 (NH silica, Hexane/EtOAc = 1/1). Mp 128.5-132.1 °C.

*Major isomer*

$^1\text{H}$  NMR ( $\text{CDCl}_3$ , 400 MHz)  $\delta$ : 2.28 (s, 6H), 3.69 (s, 3H), 4.81 (s, 2H), 6.83-6.87 (m, 2H), 7.04 (s, 1H), 7.19-7.23 (m, 1H), 7.32-7.34 (m, 1H), 7.40-7.42 (m, 1H), 7.51-7.53 (m, 2H), 7.56-7.57 (m, 4H),

7.94 (d,  $J = 8.2$  Hz, 1H), 7.98 (d,  $J = 7.8$  Hz, 1H).

$^{13}\text{C}$  NMR ( $\text{CDCl}_3$ , 101 MHz)  $\delta$ : 21.24, 29.13, 51.44, 95.83, 108.27, 108.35, 118.23, 119.26, 119.66, 121.42, 122.48, 124.29 (q,  $J = 272.2$  Hz), 125.06, 125.22 (q,  $J = 3.8$  Hz), 126.44, 128.02, 128.84 (q,  $J = 32.6$  Hz), 132.65, 132.84, 138.03, 141.25, 142.02, 144.08, 154.49, 155.22.

*Minor isomer*

$^1\text{H}$  NMR ( $\text{CDCl}_3$ , 400 MHz)  $\delta$ : 2.40 (s, 6H), 3.81 (s, 3H), 4.65 (s, 2H), 7.11–7.15 (m, 2H), 7.27–7.30 (m, 3H), 7.48 (s, 1H), 8.06–8.10 (m, 2H). Other peaks are overlapped with those of a major isomer.

$^{13}\text{C}$  NMR ( $\text{CDCl}_3$ , 101 MHz)  $\delta$ : 21.35, 53.23, 102.24, 113.78, 119.05, 119.89, 120.00, 120.55, 125.84, 127.04, 128.35, 130.84, 131.91, 138.35. Other peaks are overlapped with those of a major isomer.

*E/Z Mixture*

$^{19}\text{F}$  NMR ( $\text{CDCl}_3$ , 376 MHz)  $\delta$ : -63.56.

IR (KBr): 3052 w, 2940 w, 1662 s, 1631 s, 1600 s, 1497 m, 1468 s, 1458 s, 1418 s, 1360 m, 1328 s, 1233 m, 1203 m, 1181 s, 1113 s, 1067 m, 1017 m, 955 m, 863 m, 808 s, 745 s, 594 m.

MS,  $m/z$  (relative intensity, %): 486 ( $\text{M}^+$ , 3), 290 (50), 168 (11), 159 (100).

HRMS (DART+,  $[\text{M}+\text{H}]^+$ ) Calcd for  $\text{C}_{30}\text{H}_{26}\text{F}_3\text{N}_2\text{O}$ : 487.1992. Found: 487.1998.

**Methyl 4-(((3,5-dimethylphenyl)(4-methoxyphenoxy)methylene)amino)methyl)benzoate (**1ccd**).**

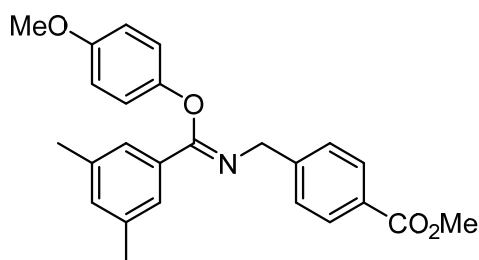

The product was obtained as a mixture of geometrical isomers ( $E:Z = 1:4.1$ ), which was determined by  $^1\text{H}$  NMR. Based on NOSEY spectroscopy of compound **1ccd**, the stereochemistry of the major isomer was determined to have a *Z* configuration.

Colorless oil (545 mg, 55%).  $R_f$  0.54 (NH silica, Hexane/EtOAc = 1/1).

*Major isomer*

$^1\text{H}$  NMR ( $\text{CDCl}_3$ , 400 MHz)  $\delta$ : 2.28 (s, 6H), 3.74 (s, 3H), 3.91 (s, 3H), 4.76 (s, 2H), 6.76–6.85 (m, 4H), 7.03 (s, 1H), 7.45–7.49 (m, 4H), 8.00–8.02 (m, 2H).

$^{13}\text{C}$  NMR ( $\text{CDCl}_3$ , 101 MHz)  $\delta$ : 21.21, 51.45, 52.00, 55.57, 114.86, 117.18, 126.48, 127.65, 128.42, 129.52, 129.67, 132.61, 137.93, 145.43, 149.26, 154.97, 155.41, 167.13.

*Minor isomer*

$^1\text{H}$  NMR ( $\text{CDCl}_3$ , 400 MHz)  $\delta$ : 2.36 (s, 6H), 3.82 (s, 3H), 3.89 (s, 3H), 4.60 (s, 2H), 6.92–6.94 (m, 2H), 7.12 (s, 3H), 7.15–7.17 (m, 2H), 7.24 (d,  $J = 8.7$  Hz, 2H), 7.93–7.95 (m, 2H).

$^{13}\text{C}$  NMR ( $\text{CDCl}_3$ , 101 MHz)  $\delta$ : 21.30, 51.97, 53.35, 55.52, 114.25, 122.96, 125.71, 126.66, 131.78,

134.30, 138.25. Other peaks are overlapped with those of a major isomer.

*E/Z Mixture*

IR (KBr): 3002 m, 2950 m, 1718 s, 1653 s, 1609 m, 1505 s, 1456 m, 1435 m, 1278 s, 1204 s, 1179 s, 1105 m, 1036 m, 823 m, 755 m.

MS, *m/z* (relative intensity, %): 403 ( $M^+$ , 5), 281 (11), 280 (48), 150 (15), 149 (100), 133 (21), 123 (19), 121 (33), 90 (14).

HRMS (DART+,  $[M+H]^+$ ) Calcd for  $C_{25}H_{26}NO_4$ : 404.1856. Found: 404.1868.

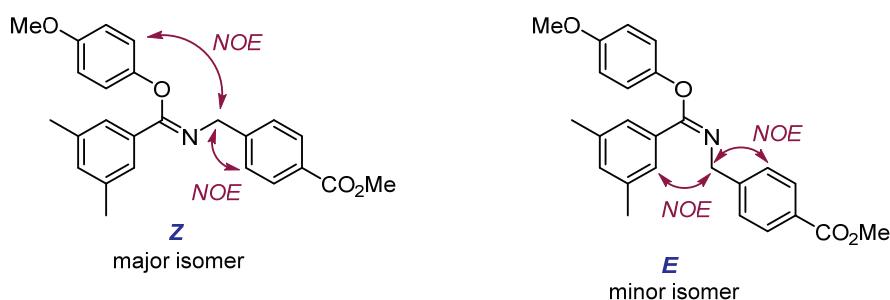

**4-Methoxyphenyl N-(4-methoxybenzyl)-3,5-dimethylbenzimidate (1ced).**

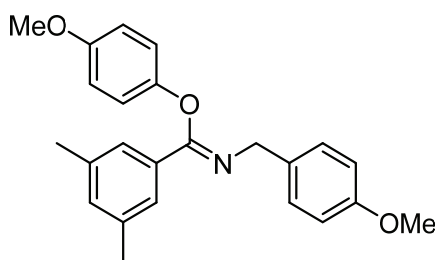

The product was obtained as a mixture of geometrical isomers ( $E:Z = 1:5.1$ ), which was determined by  $^1H$  NMR.

Colorless oil (2.37 g, 79%).  $R_f$  0.56 (NH silica, Hexane/EtOAc = 1/1).

*Major isomer*

$^1H$  NMR ( $CDCl_3$ , 400 MHz)  $\delta$ : 2.26 (s, 6H), 3.74 (s, 3H), 3.80 (s, 3H), 4.65 (s, 2H), 6.76-6.88 (m, 6H), 7.00 (s, 1H), 7.31 (d,  $J = 8.7$  Hz, 2H), 7.44 (s, 2H).

$^{13}C$  NMR ( $CDCl_3$ , 101 MHz)  $\delta$ : 21.20, 51.24, 55.25, 55.78, 113.72, 114.82, 117.12, 126.47, 129.03, 132.17, 132.39, 132.86, 137.81, 149.45, 154.47, 154.84, 158.35.

*Minor isomer*

$^1H$  NMR ( $CDCl_3$ , 400 MHz)  $\delta$ : 2.36 (s, 6H), 3.78 (s, 3H), 3.81 (s, 3H), 4.49 (s, 2H), 6.90-6.92 (m, 2H), 7.07-7.16 (m, 6H). Other peaks are overlapped with those of a major isomer.

$^{13}C$  NMR ( $CDCl_3$ , 101 MHz)  $\delta$ : 21.31, 52.95, 55.21, 55.51, 113.53, 114.18, 122.97, 125.77, 127.83, 131.56, 133.12, 138.11. Other peaks are overlapped with those of a major isomer.

*E/Z Mixture*

IR (KBr): 2951 w, 2911 w, 1654 m, 1607 m, 1504 s, 1463 m, 1440 w, 1317 m, 1301 m, 1245 s, 1178 s, 1088 m, 1035 m, 821 m, 779 w, 517 w.

MS,  $m/z$  (relative intensity, %): 375 ( $M^+$ , 3), 122 (45), 121 (100), 91 (11), 78 (10), 77 (15).

HRMS (DART+,  $[M+H]^+$ ) Calcd for  $C_{24}H_{26}NO_3$ : 376.1907. Found: 376.1910.

**4-Methoxyphenyl 3,5-dimethyl-N-(thiophen-2-ylmethyl)benzimidate (1cfd).**

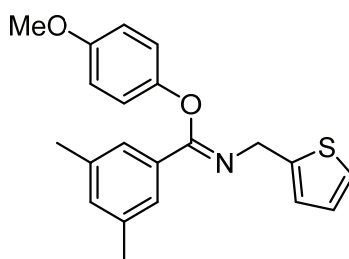

The product was obtained as a mixture of geometrical isomers ( $E:Z = 1:4.0$ ), which was determined by  $^1H$  NMR.

Pale yellow oil (1.47 g, 69%).  $R_f$  0.68 (NH silica, Hexane/EtOAc = 1/1).

*Major isomer*

$^1H$  NMR ( $CDCl_3$ , 400 MHz)  $\delta$ : 2.27 (s, 6H), 3.74 (s, 3H), 4.88 (s, 2H), 6.76-6.86 (m, 4H), 6.95 (d,  $J = 3.7$  Hz, 2H), 7.01 (s, 1H), 7.21 (t,  $J = 3.2$  Hz, 1H), 7.43 (s, 2H).

$^{13}C$  NMR ( $CDCl_3$ , 101 MHz)  $\delta$ : 21.21, 47.00, 55.57, 114.83, 117.31, 122.99, 124.11, 124.31, 126.57, 126.65, 132.56, 137.85, 143.45, 149.26, 154.99, 155.27.

*Minor isomer*

$^1H$  NMR ( $CDCl_3$ , 400 MHz)  $\delta$ : 2.37 (s, 6H), 3.81 (s, 3H), 4.70 (s, 2H), 6.91-6.93 (m, 3H). Other peaks are overlapped with those of a major isomer.

$^{13}C$  NMR ( $CDCl_3$ , 101 MHz)  $\delta$ : 21.31, 49.58, 55.51, 114.17, 122.66, 123.50, 125.73, 126.50, 131.75, 138.21, 145.03, 146.60, 156.41, 162.36. Other peaks are overlapped with those of a major isomer.

*E/Z Mixture*

IR (KBr): 2948 w, 2913 w, 1655 m, 1604 w, 1503 s, 1462 w, 1440 w, 1314 m, 1245 m, 1190 m, 1091 m, 1034 m, 822 m, 779 w, 698 m.

MS,  $m/z$  (relative intensity, %): 351 ( $M^+$ , 3), 228 (26), 220 (15), 123 (11), 99 (20), 98 (49), 97 (100), 53 (19), 44 (14).

HRMS (DART+,  $[M+H]^+$ ) Calcd for  $C_{21}H_{22}NO_2S$ : 352.1366. Found: 352.1368.

**Naphthalen-2-yl 3,5-dimethyl-N-(2-methylbenzyl)benzimidate (1add).**

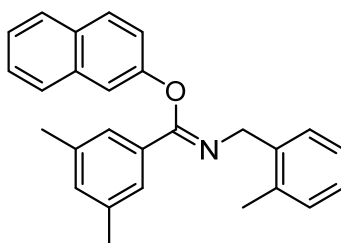

The product was obtained as a mixture of geometrical isomers ( $E:Z = 1:13$ ), which was determined by  $^1\text{H}$  NMR.

White solid (1.05 g, 46%).  $R_f$  0.68 (NH silica, Hexane/EtOAc = 1/1). Mp 61.2-62.7 °C.

*Major isomer*

$^1\text{H}$  NMR ( $\text{CDCl}_3$ , 400 MHz)  $\delta$ : 2.26 (s, 6H), 2.32 (s, 3H), 4.71 (s, 2H), 7.02 (s, 1H), 7.14-7.17 (m, 4H), 7.25-7.28 (m, 1H), 7.33-7.37 (m, 1H), 7.39-7.43 (m, 2H), 7.55 (s, 2H), 7.62 (d,  $J = 7.8$  Hz, 1H), 7.76-7.81 (m, 2H).

$^{13}\text{C}$  NMR ( $\text{CDCl}_3$ , 101 MHz)  $\delta$ : 19.28, 21.22, 50.00, 110.76, 117.72, 124.45, 125.77, 125.91, 126.41, 126.64, 126.79, 126.96, 127.69, 128.18, 129.61, 130.00, 130.21, 132.52, 132.73, 134.21, 136.19, 137.84, 137.98, 153.27.

*Minor isomer*

$^1\text{H}$  NMR ( $\text{CDCl}_3$ , 400 MHz)  $\delta$ : 2.37 (s, 6H), 2.41 (s, 3H), 4.51 (s, 2H), 7.08-7.10 (m, 3H), 7.46 (m, 2H), 7.68 (m, 2H), 7.84-7.87 (m, 3H). Other peaks are overlapped with those of a major isomer.

$^{13}\text{C}$  NMR ( $\text{CDCl}_3$ , 101 MHz)  $\delta$ : 19.02, 21.33, 51.65, 118.49, 122.64, 125.04, 125.65, 126.09, 126.25, 126.51, 127.49, 127.91, 128.78, 129.65, 130.92, 131.01, 131.72, 138.20, 153.99. Other peaks are overlapped with those of a major isomer.

*E/Z Mixture*

IR (KBr): 3008 m, 2918 m, 2231 s, 1662 s, 1629 m, 1605 s, 1508 s, 1456 s, 1377 m, 1316 s, 1248 s, 1212 s, 1187 s, 1166 s, 1083 m, 1038 m, 960 m, 908 m, 856 s, 746 s.

MS,  $m/z$  (relative intensity, %): 379 ( $\text{M}^+$ , 5), 133 (33), 105 (100), 79 (15), 77 (13).

HRMS (DART+,  $[\text{M}+\text{H}]^+$ ) Calcd for  $\text{C}_{27}\text{H}_{26}\text{NO}$ : 380.2009. Found: 380.2009.

#### IV. Optimization Studies

**Table S1.** Screening of catalyst precursors<sup>a</sup>

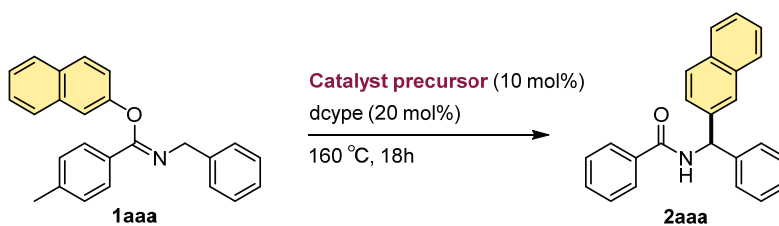

| Entry           | Catalyst precursor                          | Yield of <b>2aaa</b> [%] | Recovery of <b>1aaa</b> [%] |
|-----------------|---------------------------------------------|--------------------------|-----------------------------|
| 1               | Ni(cod) <sub>2</sub>                        | 51                       | 12                          |
| 2               | NiCl <sub>2</sub> ·DME                      | 0                        | 94                          |
| 3               | NiBr <sub>2</sub> ·DME                      | 0                        | 100                         |
| 4               | Ni(OAc) <sub>2</sub>                        | 0                        | 71                          |
| 5               | Ni(OTf) <sub>2</sub>                        | 0                        | 89                          |
| 7 <sup>b</sup>  | Ni(dcype)(CO) <sub>2</sub>                  | 13                       | 50                          |
| 8               | NiCl <sub>2</sub> ·DME/ Mn (1 equiv)        | 0                        | 91                          |
| 9               | Ni(acac) <sub>2</sub> /BuLi (20 mol%)       | 12                       | 42                          |
| 10              | Ni(acac) <sub>2</sub> /MeMgI (20 mol%)      | 0                        | 0                           |
| 11 <sup>c</sup> | Pd <sub>2</sub> (dba) <sub>3</sub> (5 mol%) | 0                        | 60                          |
| 12 <sup>c</sup> | [RhCl(cod)] <sub>2</sub> (5 mol%)           | 0                        | 84                          |
| 13 <sup>c</sup> | None                                        | 0                        | 100                         |

<sup>a</sup> Reaction conditions: **1aaa** (0.20 mmol), catalyst (0.020 or 0.010 mmol), dcype (0.040 mmol), and dioxane (1.5 mL) in a screw capped vial under N<sub>2</sub> at 160 °C for 18h. Yields were determined by GC using pentadecane as an internal standard.

<sup>b</sup> With dcype 10 mol% instead of 20 mol%

<sup>c</sup> In toluene instead of dioxane

**Table S2.** Screening of solvent<sup>a</sup>

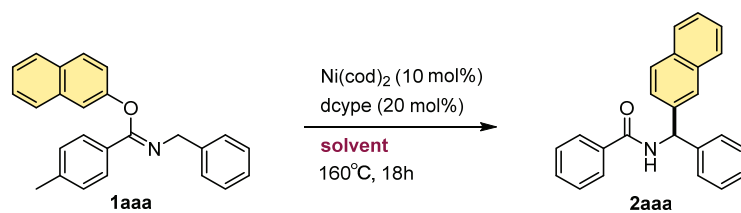

| Entry    | Solvent                   | Yield of <b>2aaa</b> [%] | Recovery of <b>1aaa</b> [%] |
|----------|---------------------------|--------------------------|-----------------------------|
| 1        | toluene                   | 46                       | 13                          |
| 2        | mesitylene                | 44                       | 2                           |
| <b>3</b> | <b>dioxane</b>            | 51                       | 12                          |
| 4        | dibutyl ether             | 51                       | 7                           |
| 5        | CPME                      | 49                       | 3                           |
| 6        | diglyme                   | 37                       | 9                           |
| 7        | DMF                       | 19                       | 9                           |
| 8        | DMAc                      | 27                       | 3                           |
| 9        | DMI                       | 16                       | 3                           |
| 10       | DMSO                      | 19                       | n.d.                        |
| 11       | <i>tert</i> -amyl alcohol | 0.3                      | 30                          |
| 12       | octane                    | 34                       | 22                          |
| 13       | ethylcyclohexane          | 43                       | 16                          |

<sup>a</sup> Reaction conditions: **1aaa** (0.20 mmol),  $\text{Ni(cod)}_2$  (0.020 mmol),  $\text{dcype}$  (0.040 mmol), and solvent (1.5 mL) in a screw capped vial under  $\text{N}_2$  at 160 °C for 18 h. Yields were determined by GC using pentadecane as an internal standard.

### V. A Typical Procedure

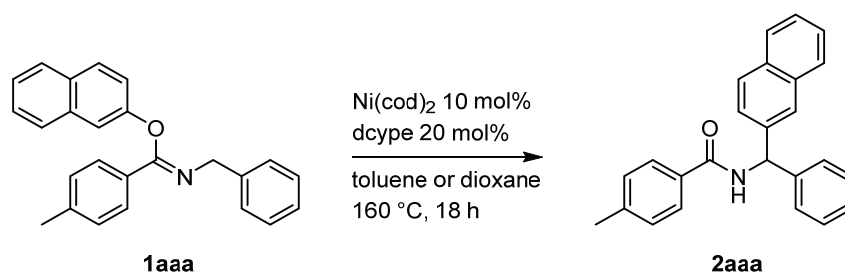

In a glovebox filled with nitrogen, aryl *N*-benzylimidate **1aaa** (73.5 mg, 0.21 mmol),  $\text{Ni(cod)}_2$  (5.5 mg, 0.020 mmol),  $\text{dcype}$  (16.9 mg, 0.040 mmol) and solvent (1.5 mL) were added to a 5 mL vial with a Teflon-sealed screwcap. The mixture was stirred at 160 °C for 18 h. The resulting mixture was then evaporated to dryness, and the residue was purified by flash column chromatography (eluent: hexane/EtOAc = 9/1 to 7/3) to give **2aaa** as a white solid (36.3 mg, 49%).

## Spectroscopic Data of Products

### 4-Methyl-*N*-(naphthalen-2-yl(phenyl)methyl)benzamide (2aaa).

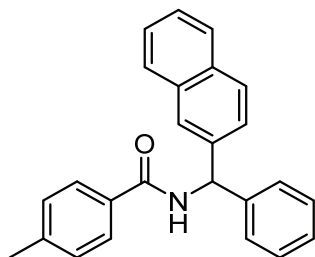

White solid (36.3 mg, 49%).  $R_f$  0.54 (SiO<sub>2</sub>, Hexane/EtOAc = 1/1). Mp 187.2-188.1 °C.

<sup>1</sup>H NMR (CDCl<sub>3</sub>, 400 MHz)  $\delta$ : 2.40 (s, 3H), 6.61 (d,  $J$  = 7.8 Hz, 1H), 6.75 (d,  $J$  = 7.8 Hz, 1H), 7.23 (s, 1H), 7.26 (d,  $J$  = 0.9 Hz, 1H), 7.29-7.41 (m, 6H), 7.45-7.49 (m, 2H), 7.73-7.83 (m, 6H).

<sup>13</sup>C NMR (CDCl<sub>3</sub>, 101 MHz)  $\delta$ : 21.47, 57.45, 125.66, 126.05, 126.07, 126.28, 127.06, 127.62, 127.64, 127.99, 128.59, 128.76, 129.28, 131.25, 132.72, 133.24, 138.82, 141.36, 142.21, 166.43.

IR (KBr): 3325 m, 3055 m, 2923 m, 1634 s, 1540 s, 1506 s, 1454 m, 1329 s, 1281 m, 1189 m, 1121 m, 817 s, 754 s, 734 m, 698 s, 655 m, 576 m, 474 s.

MS,  $m/z$  (relative intensity, %): 352 (10), 351 (M<sup>+</sup>, 37), 351 (49), 233 (13), 232 (64), 215 (15), 120 (11), 119 (100), 104 (19), 91 (35).

HRMS (DART+, [M+H]<sup>+</sup>) Calcd for C<sub>25</sub>H<sub>22</sub>NO: 352.1696. Found: 352.1694.

### *N*-(Naphthalen-2-yl(phenyl)methyl)-4-(trifluoromethyl)benzamide (2aab).

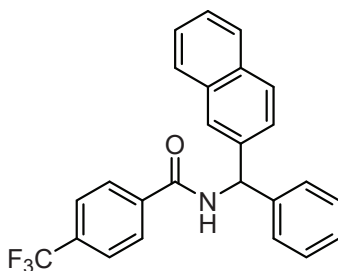

White solid (36.9 mg, 40%).  $R_f$  0.66 (SiO<sub>2</sub>, Hexane/EtOAc = 1/1). Mp 193.1-193.2 °C.

<sup>1</sup>H NMR (CDCl<sub>3</sub>, 400 MHz)  $\delta$ : 6.61 (d,  $J$  = 7.8 Hz, 1H), 6.83 (d,  $J$  = 7.3 Hz, 1H), 7.30-7.40 (m, 6H), 7.46-7.50 (m, 2H), 7.70 (d,  $J$  = 8.2 Hz, 2H), 7.74 (s, 1H), 7.77-7.81 (m, 1H), 7.82-7.84 (m, 2H), 7.94 (d,  $J$  = 8.2 Hz, 2H).

<sup>13</sup>C NMR (CDCl<sub>3</sub>, 101 MHz)  $\delta$ : 57.79, 123.58 (q,  $J$  = 273.2 Hz), 125.46, 125.71 (q,  $J$  = 3.4 Hz), 126.10, 126.26, 126.45, 127.57, 127.66, 127.86, 127.97, 128.77, 128.89, 132.79, 133.22, 133.43 (q,  $J$  = 32.6 Hz), 137.37, 138.28, 140.85, 165.26.

<sup>19</sup>F NMR (CDCl<sub>3</sub>, 376 MHz)  $\delta$ : -64.23.

IR (KBr): 3297 m, 1644 s, 1539 s, 1507 m, 1327 s, 1165 s, 1128 s, 1110 m, 1068 m, 1016 m, 860 m,



813 m, 750 m, 719 w, 697 m, 477 m.

MS,  $m/z$  (relative intensity, %): 406 (18), 405 ( $M^+$ , 64), 233 (17), 232 (80), 217 (15), 216 (26), 215 (52), 202 (13), 173 (78), 154 (19), 145 (66), 129 (24), 128 (11), 127 (23), 105 (12), 104 (100), 77 (18).

HRMS (DART+,  $[M+H]^+$ ) Calcd for  $C_{25}H_{19}F_3NO$ : 406.1413. Found: 406.1414.

#### 4-Methoxy-*N*-(naphthalen-2-yl(phenyl)methyl)benzamide (2aac).

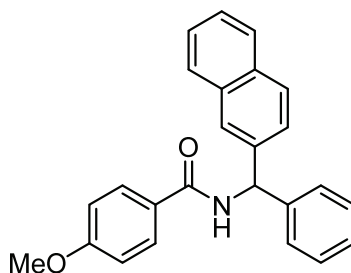

White solid (26.3 mg, 35%).  $R_f$  0.48 ( $SiO_2$ , Hexane/EtOAc = 1/1). Mp 162.7-163.3 °C.

$^1H$  NMR ( $CDCl_3$ , 400 MHz)  $\delta$ : 3.84 (s, 3H), 6.60 (d,  $J = 7.8$  Hz, 1H), 6.71 (d,  $J = 7.8$  Hz, 1H), 6.92 (d,  $J = 8.7$  Hz, 2H), 7.27-7.36 (m, 5H), 7.39 (dd,  $J = 8.2$  Hz,  $J = 1.8$  Hz, 1H), 7.44-7.49 (m, 2H), 7.74 (s, 1H), 7.76-7.82 (m, 5H).

$^{13}C$  NMR ( $CDCl_3$ , 101 MHz)  $\delta$ : 55.40, 57.45, 113.77, 125.67, 126.05, 126.27, 126.37, 127.58, 127.60, 127.64, 127.98, 128.55, 128.74, 128.90, 132.71, 133.24, 138.92, 141.44, 162.32, 166.02.

IR (KBr): 3289 m, 3057 w, 1635 s, 1605 s, 1539 s, 1504 s, 1456 w, 1438 w, 1337 m, 1297 m, 1253 s, 1181 m, 1033 m, 847 m, 813 m, 751 m, 698 m, 477 m.

MS,  $m/z$  (relative intensity, %): 367 ( $M^+$ , 20), 233 (11), 232 (56), 215 (10), 136 (10), 135 (100), 107 (10), 77 (18).

HRMS (DART+,  $[M+H]^+$ ) Calcd for  $C_{25}H_{22}NO_2$ : 368.1645. Found: 368.1644.

#### 3,5-Dimethyl-*N*-(naphthalen-2-yl(phenyl)methyl)benzamide (2aad).

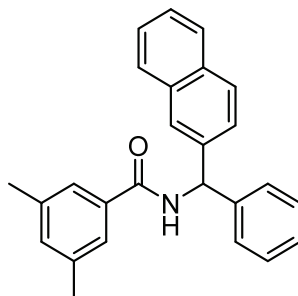

White solid (37.6 mg, 52%).  $R_f$  0.62 ( $SiO_2$ , Hexane/EtOAc = 1/1). Mp 179.5-180.2 °C. The only detectable byproducts were hydrolysis products (*i.e.*, 9% of 2-naphthol and 10% of *N*-benzyl-3,5-dimethylbenzamide was observed, as determined by GC using pentadecane as an internal standard.).

$^1\text{H}$  NMR ( $\text{CDCl}_3$ , 400 MHz)  $\delta$ : 2.34 (s, 6H), 6.61 (d,  $J = 7.8$  Hz, 1H), 6.78 (d,  $J = 7.8$  Hz, 1H), 7.13 (s, 1H), 7.27-7.35 (m, 5H), 7.39 (dd,  $J = 8.7$  Hz,  $J = 1.8$  Hz, 1H), 7.43 (s, 2H), 7.45-7.48 (m, 2H), 7.74 (s, 1H), 7.76-7.78 (m, 1H), 7.79-7.81 (m, 2H).

$^{13}\text{C}$  NMR ( $\text{CDCl}_3$ , 101 MHz)  $\delta$ : 21.19, 57.40, 124.78, 125.68, 126.05, 126.08, 126.26, 127.57, 127.59, 127.64, 127.97, 128.54, 128.72, 132.70, 133.23, 133.27, 134.13, 138.33, 138.83, 141.35, 166.85.

IR (KBr): 3298 s, 3052 m, 1634 s, 1602 s, 1539 s, 1455 m, 1348 m, 1336 m, 1244 s, 892 m, 860 m, 841 m, 816 s, 748 s, 713 s, 699 s, 590 m, 556 m, 478 s.

MS,  $m/z$  (relative intensity, %): 366 (13), 365 ( $\text{M}^+$ , 43), 233 (14), 232 (74), 215 (18), 134 (23), 133 (100), 127 (10), 105 (43), 104 (21), 79 (15), 77 (17).

HRMS (DART+,  $[\text{M}+\text{H}]^+$ ) Calcd for  $\text{C}_{26}\text{H}_{24}\text{NO}$ : 366.1852. Found: 366.1850.

***N*-(Naphthalen-2-yl(phenyl)methyl)-3,5-bis(trifluoromethyl)benzamide (2aae).**

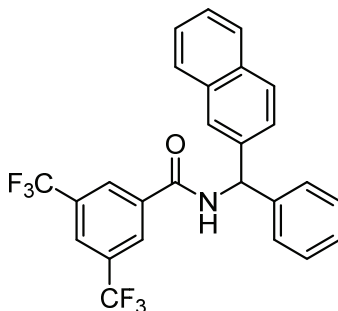

White solid (29.9 mg, 31%).  $R_f$  0.72 ( $\text{SiO}_2$ , Hexane/EtOAc = 1/1). Mp 192.9-193.2  $^\circ\text{C}$ .

$^1\text{H}$  NMR ( $\text{CDCl}_3$ , 400 MHz)  $\delta$ : 6.60 (d,  $J = 7.8$  Hz, 1H), 6.93 (d,  $J = 6.9$  Hz, 1H), 7.31-7.40 (m, 6H), 7.47-7.51 (m, 2H), 7.73 (s, 1H), 7.76-7.81 (m, 1H), 7.82-7.85 (m, 2H), 8.01 (s, 1H), 8.26 (s, 2H).

$^{13}\text{C}$  NMR ( $\text{CDCl}_3$ , 101 MHz)  $\delta$ : 58.12, 122.82 (q,  $J = 273.2$  Hz), 125.26 (m,  $J = 3.4$  Hz), 125.41, 126.24, 126.37, 126.53, 127.39 (q,  $J = 1.9$  Hz), 127.60, 127.68, 127.97, 128.01, 128.86, 128.94, 132.23 (q,  $J = 33.9$  Hz), 132.82, 133.17, 136.06, 137.84, 140.41, 163.63.

$^{19}\text{F}$  NMR ( $\text{CDCl}_3$ , 376 MHz)  $\delta$ : -64.08.

IR (KBr): 3292 m, 1637 s, 1616 m, 1539 s, 1455 m, 1380 w, 1331 m, 1277 s, 1172 m, 1141 s, 908 m, 845 m, 815 m, 754 m, 700 m, 681 m, 477 m.

MS,  $m/z$  (relative intensity, %): 474 (16), 473 ( $\text{M}^+$ , 90), 241 (65), 232 (77), 217 (13), 216 (32), 215 (69), 212 (34), 207 (50), 129 (22), 127 (20), 104 (100), 73 (41).

HRMS (DART+,  $[\text{M}+\text{H}]^+$ ) Calcd for  $\text{C}_{26}\text{H}_{18}\text{F}_6\text{NO}$ : 474.1287. Found: 474.1294.

**3,5-Di-*tert*-butyl-*N*-(naphthalen-2-yl(phenyl)methyl)benzamide (2aaf).**

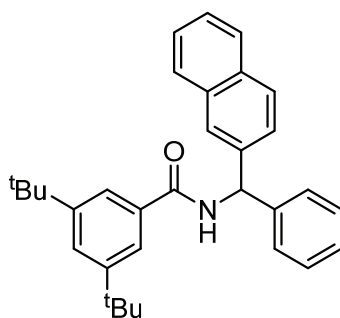

White solid (36.9 mg, 41%).  $R_f$  0.70 (SiO<sub>2</sub>, Hexane/EtOAc = 1/1). Mp 221.1-221.6 °C.

<sup>1</sup>H NMR (CDCl<sub>3</sub>, 400 MHz)  $\delta$ : 1.34 (s, 18H), 6.64 (d,  $J$  = 7.8 Hz, 1H), 6.72 (d,  $J$  = 7.8 Hz, 1H), 7.29-7.40 (m, 5H), 7.43 (dd,  $J$  = 8.7, 1.8 Hz, 1H), 7.46-7.50 (m, 2H), 7.60 (t,  $J$  = 1.8 Hz, 1H), 7.65 (d,  $J$  = 1.8 Hz, 2H), 7.77-7.85 (m, 4H).

<sup>13</sup>C NMR (CDCl<sub>3</sub>, 101 MHz)  $\delta$ : 31.37, 34.98, 57.52, 121.15, 125.71, 126.01, 126.09, 126.17, 126.31, 127.63, 127.68, 128.01, 128.62, 128.78, 132.73, 133.24, 133.79, 138.86, 141.37, 151.37, 167.59.

IR (KBr): 3256 s, 2961 s, 1634 s, 1592 m, 1539 s, 1522 s, 1363 m, 1275 m, 1249 m, 889 m, 810 m, 748 s, 708 s, 696 s, 477 m.

MS,  $m/z$  (relative intensity, %): 450 (13), 449 (M<sup>+</sup>, 35), 233 (19), 232 (100), 218 (16), 217 (55), 215 (12), 207 (11), 133 (18), 104 (13), 73 (11), 57 (25).

HRMS (DART+, [M+H]<sup>+</sup>) Calcd for C<sub>32</sub>H<sub>36</sub>NO: 450.2791. Found: 450.2793.

#### 4-Methyl-N-(naphthalen-2-yl(phenyl)methyl)benzamide (2abd).

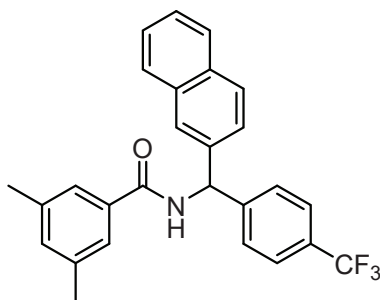

White solid (52.2 mg, 60%).  $R_f$  0.64 (SiO<sub>2</sub>, Hexane/EtOAc = 1/1). Mp 199.0-200.0 °C.

<sup>1</sup>H NMR (CDCl<sub>3</sub>, 400 MHz)  $\delta$ : 2.33 (s, 6H), 6.62 (d,  $J$  = 7.8 Hz, 1H), 6.84 (d,  $J$  = 7.8 Hz, 1H), 7.14 (s, 1H), 7.35 (dd,  $J$  = 8.2 Hz,  $J$  = 1.8 Hz, 1H), 7.42 (s, 2H), 7.45 (d,  $J$  = 8.2 Hz, 2H), 7.48-7.51 (m, 2H), 7.59 (d,  $J$  = 8.2 Hz, 2H), 7.69 (s, 1H), 7.75-7.79 (m, 1H), 7.82-7.84 (m, 2H).

<sup>13</sup>C NMR (CDCl<sub>3</sub>, 101 MHz)  $\delta$ : 21.19, 57.27, 124.04 (q,  $J$  = 271.9 Hz), 124.81, 125.49, 125.65 (q,  $J$  = 3.8 Hz), 126.44, 126.57, 126.61, 127.67, 127.75, 127.98, 128.96, 129.70 (q,  $J$  = 32.3 Hz), 132.84, 133.21, 133.53, 133.71, 137.93, 138.44, 145.28, 167.04.

<sup>19</sup>F NMR (CDCl<sub>3</sub>, 376 MHz)  $\delta$ : -63.74.

IR (KBr): 3285 s, 1636 s, 1602 s, 1527 s, 1327 s, 1249 m, 1160 s, 1121 s, 1068 m, 1021 m, 862 m,

848 s, 814 m, 737 m, 607 m, 473 s.

MS,  $m/z$  (relative intensity, %): 433 ( $M^+$ , 20), 300 (35), 134 (19), 133 (100), 105 (31).

HRMS (DART+,  $[M+H]^+$ ) Calcd for  $C_{27}H_{23}F_3NO$ : 434.1726. Found: 434.1722.

**3,5-Dimethyl-*N*-(naphthalen-1-yl(4-(trifluoromethyl)phenyl)methyl)benzamide (2bbd).**

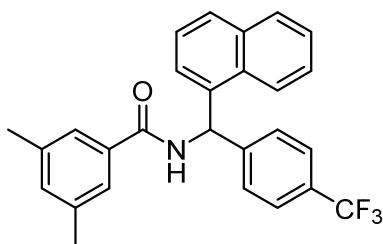

White solid (62.7 g, 88%).  $R_f$  0.66 ( $SiO_2$ , Hexane/EtOAc = 1/1). Mp 228.6-229.7 °C.

$^1H$  NMR ( $CDCl_3$ , 400 MHz)  $\delta$ : 2.32 (s, 6H), 6.72 (d,  $J = 7.8$  Hz, 1H), 7.14 (s, 1H), 7.16 (d,  $J = 6.9$  Hz, 1H), 7.23 (d,  $J = 7.8$  Hz, 1H), 7.39 (s, 2H), 7.42 (d,  $J = 6.9$  Hz, 1H), 7.48 (d,  $J = 8.2$  Hz, 2H), 7.51-7.55 (m, 2H), 7.61 (d,  $J = 8.2$  Hz, 2H), 7.86 (d,  $J = 8.2$  Hz, 1H), 7.90-7.94 (m, 1H), 8.06-8.09 (m, 1H).

$^{13}C$  NMR ( $CDCl_3$ , 101 MHz)  $\delta$ : 21.19, 53.89, 123.39, 124.07 (q,  $J = 272.0$  Hz), 124.78, 125.20, 125.63 (q,  $J = 3.8$  Hz), 126.20, 126.23, 127.10, 127.70, 128.95, 129.10, 129.66 (q,  $J = 31.6$  Hz), 131.20, 133.52, 133.56, 134.04, 136.40, 138.45, 145.21, 166.84.

$^{19}F$  NMR ( $CDCl_3$ , 376 MHz)  $\delta$ : -63.71.

IR (KBr): 3302 s, 3042 w, 1628 s, 1598 s, 1527 s, 1421 w, 1324 s, 1244 m, 1157 s, 1125 s, 1071 s, 1019 m, 859 m, 832 w, 803 m, 776 s, 709 m, 692 m, 623 w.

MS,  $m/z$  (relative intensity, %): 433 ( $M^+$ , 19), 300 (24), 134 (120), 133 (100), 105 (32), 79 (12).

HRMS (DART+,  $[M+H]^+$ ) Calcd for  $C_{27}H_{23}F_3NO$ : 434.1726. Found: 434.1727.

***N*-(4-Methoxyphenyl)(4-(trifluoromethyl)phenyl)methyl-3,5-dimethylbenzamide (2cbd).**

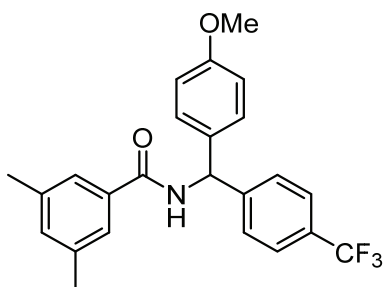

White solid (62.9 mg, 75%).  $R_f$  0.60 ( $SiO_2$ , Hexane/EtOAc = 1/1). Mp 184.7-184.9 °C.

$^1H$  NMR ( $CDCl_3$ , 400 MHz)  $\delta$ : 2.34 (s, 6H), 3.79 (s, 3H), 6.39 (d,  $J = 7.3$  Hz, 1H), 6.70 (d,  $J = 7.3$  Hz, 1H), 6.88 (d,  $J = 8.7$  Hz, 2H), 7.14 (s, 1H), 7.17 (d,  $J = 8.7$  Hz, 2H), 7.40-7.42 (m, 4H), 7.58 (d,  $J = 8.2$  Hz, 2H).

$^{13}\text{C}$  NMR ( $\text{CDCl}_3$ , 101 MHz)  $\delta$ : 21.19, 55.28, 56.65, 114.28, 124.06 (q,  $J = 272.2$  Hz), 124.76, 125.53 (q,  $J = 3.8$  Hz), 127.46, 128.99, 129.47 (q,  $J = 32.6$  Hz), 132.82, 133.44, 133.78, 138.38, 145.69, 159.24, 166.90.

$^{19}\text{F}$  NMR ( $\text{CDCl}_3$ , 376 MHz)  $\delta$ : -63.71.

IR (KBr): 3301 s, 2954 m, 2912 m, 2837 m, 1633 s, 1604 s, 1532 m, 1512 s, 1328 s, 1247 s, 1167 s, 1120 s, 1071 s, 1035 s, 1021 s, 862 s, 825 s, 768 m, 711 m, 688 m, 604.

MS,  $m/z$  (relative intensity, %): 414 (10), 413 ( $\text{M}^+$ , 42), 280 (27), 207 (12), 134 (43), 133 (100), 105 (33), 79 (11), 73 (12).

HRMS (DART+,  $[\text{M}+\text{H}]^+$ ) Calcd for  $\text{C}_{24}\text{H}_{23}\text{F}_3\text{NO}_2$ : 414.1675. Found: 414.1678.

***N*-((4-(Dimethylamino)phenyl)(4-(trifluoromethyl)phenyl)methyl)-3,5-dimethylbenzamide (2dbd).**

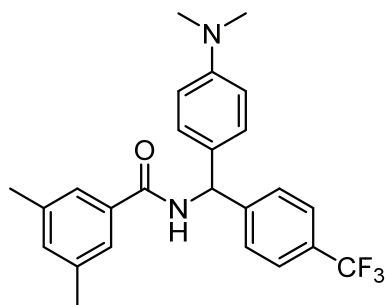

White solid (58.2 mg, 68%).  $R_f$  0.52 ( $\text{SiO}_2$ , Hexane/EtOAc = 1/1). Mp 217.2-217.8 °C.

$^1\text{H}$  NMR ( $\text{CDCl}_3$ , 400 MHz)  $\delta$ : 2.34 (s, 6H), 2.95 (s, 6H), 6.34 (d,  $J = 7.3$  Hz, 1H), 6.62 (d,  $J = 7.3$  Hz, 1H), 6.69 (d,  $J = 8.7$  Hz, 2H), 7.10 (d,  $J = 8.7$  Hz, 2H), 7.14 (s, 1H), 7.40 (s, 2H), 7.44 (d,  $J = 7.8$  Hz, 2H), 7.58 (d,  $J = 8.2$  Hz, 2H).

$^{13}\text{C}$  NMR ( $\text{CDCl}_3$ , 101 MHz)  $\delta$ : 21.19, 40.41, 56.88, 112.50, 124.15 (q,  $J = 272.2$  Hz), 124.74, 125.42 (q,  $J = 3.8$  Hz), 127.28, 128.20, 128.77, 129.19 (q,  $J = 32.6$  Hz), 133.33, 133.93, 138.34, 146.06, 150.14, 166.84.

$^{19}\text{F}$  NMR ( $\text{CDCl}_3$ , 376 MHz)  $\delta$ : -63.65.

IR (KBr): 3289 s, 2916 m, 1633 s, 1604 s, 1522 s, 1324 s, 1247 s, 1163 s, 1119 s, 1069 s, 1019 m, 947 m, 861 s, 809 s, 751 m, 689 m, 603 m.

MS,  $m/z$  (relative intensity, %): 427 (14), 426 ( $\text{M}^+$ , 49), 293 (17), 281 (17), 279 (11), 278 (59), 277 (20), 276 (12), 165 (12), 147 (11), 134 (20), 133 (100), 122 (24), 105 (48), 103 (12), 79 (22), 77 (21).

HRMS (DART+,  $[\text{M}+\text{H}]^+$ ) Calcd for  $\text{C}_{25}\text{H}_{26}\text{F}_3\text{N}_2\text{O}$ : 427.1992. Found: 427.1988.

***N*-([1,1'-Biphenyl]-4-yl(4-(trifluoromethyl)phenyl)methyl)-3,5-dimethylbenzamide (2ebd).**

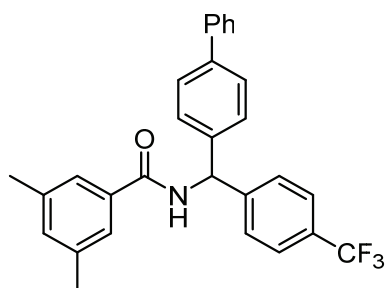

White solid (45.6 mg, 50%).  $R_f$  0.68 (SiO<sub>2</sub>, Hexane/EtOAc = 1/1). Mp 219.4-220.4 °C.

<sup>1</sup>H NMR (CDCl<sub>3</sub>, 400 MHz)  $\delta$ : 2.36 (s, 6H), 6.51 (d,  $J$  = 7.3 Hz, 1H), 6.70 (d,  $J$  = 7.3 Hz, 1H), 7.16 (s, 1H), 7.33-7.38 (m, 3H), 7.43-7.49 (m, 6H), 7.56-7.63 (m, 6H).

<sup>13</sup>C NMR (CDCl<sub>3</sub>, 101 MHz)  $\delta$ : 21.23, 56.97, 124.04 (q,  $J$  = 272.2 Hz), 124.78, 125.70 (q,  $J$  = 3.8 Hz), 127.07, 127.55, 127.68, 127.71, 128.15, 128.84, 129.74 (q,  $J$  = 32.6 Hz), 133.55, 133.73, 138.47, 139.61, 140.34, 141.01, 145.34, 166.98.

<sup>19</sup>F NMR (CDCl<sub>3</sub>, 376 MHz)  $\delta$ : -63.74.

IR (KBr): 3278 s, 3031 w, 1637 s, 1605 s, 1527 s, 1486 m, 1329 s, 1247 m, 1165 s, 1122 s, 1072 m, 1018 m, 870 s, 819 s, 763 s, 701 s, 664 m, 620 m.

MS,  $m/z$  (relative intensity, %): 459 (M<sup>+</sup>, 27), 326 (16), 134 (41), 133 (100), 105 (39), 79 (13), 77 (12).

HRMS (DART+, [M+H]<sup>+</sup>) Calcd for C<sub>29</sub>H<sub>25</sub>F<sub>3</sub>NO: 460.1883. Found: 460.1885.

***N*-((4-Fluorophenyl)(4-(trifluoromethyl)phenyl)methyl)-3,5-dimethylbenzamide (1fbd).**

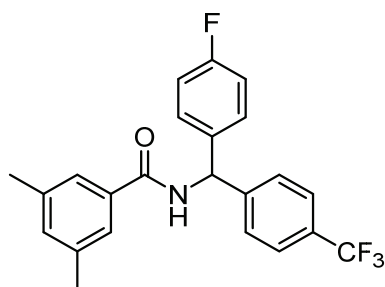

White solid (46.1 g, 54%).  $R_f$  0.68 (SiO<sub>2</sub>, Hexane/EtOAc = 1/1). Mp 198.8-199.1 °C.

<sup>1</sup>H NMR (CDCl<sub>3</sub>, 400 MHz)  $\delta$ : 2.35 (s, 6H), 6.45 (d,  $J$  = 7.3 Hz, 1H), 6.65 (br, 1H), 7.05 (t,  $J$  = 8.7 Hz, 2H), 7.16 (s, 1H), 7.22-7.26 (m, 2H), 7.40-7.42 (m, 4H), 7.61 (d,  $J$  = 7.8 Hz, 2H).

<sup>13</sup>C NMR (CDCl<sub>3</sub>, 101 MHz)  $\delta$ : 21.20, 56.47, 115.88 (d,  $J$  = 22.0 Hz), 123.96 (q,  $J$  = 272.2 Hz), 124.74, 125.73 (q,  $J$  = 3.5 Hz), 127.62, 129.39 (d,  $J$  = 8.6 Hz), 129.83 (q,  $J$  = 32.6 Hz), 133.60, 136.46 (d,  $J$  = 3.8 Hz), 138.48, 145.15, 162.29 (d,  $J$  = 247.3 Hz), 166.93.

<sup>19</sup>F NMR (CDCl<sub>3</sub>, 376 MHz)  $\delta$ : -115.22 (s, 1F), -63.80 (s, 3F).

IR (KBr): 3332 s, 1635 s, 1604 s, 1539 m, 1511 m, 1333 s, 1248 m, 1226 m, 1162 s, 1119 s, 1072 s, 1017 s, 915 m, 877 m, 864 s, 825 s, 767 s, 751 s, 716 m, 687 m, 634 m, 602 s, 553 m, 531 s.

MS,  $m/z$  (relative intensity, %): 401 ( $M^+$ , 32), 134 (33), 133 (100), 105 (32), 79 (12).

HRMS (DART+,  $[M+H]^+$ ) Calcd for  $C_{23}H_{20}F_4NO$ : 402.1476. Found: 402.1479.

***N*-((4-Acetylphenyl)(4-(trifluoromethyl)phenyl)methyl)-3,5-dimethylbenzamide (2gbd).**

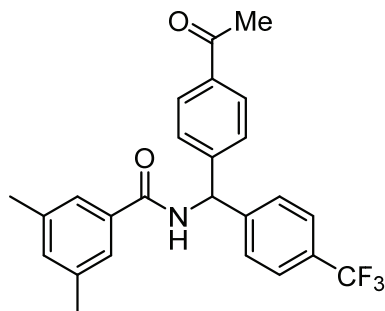

The general procedure was followed, except that the reaction temperature was 180 °C in dibutyl ether. White solid (45.7 mg, 56%).  $R_f$  0.50 (SiO<sub>2</sub>, Hexane/EtOAc = 1/1). Mp 189.3-190.6 °C.

<sup>1</sup>H NMR (CDCl<sub>3</sub>, 400 MHz)  $\delta$ : 2.36 (s, 6H), 2.60 (s, 3H), 6.53 (d,  $J$  = 7.8 Hz, 1H), 6.64 (d,  $J$  = 7.3 Hz, 1H), 7.17 (s, 1H), 7.39-7.43 (m, 6H), 7.63 (d,  $J$  = 8.2 Hz, 2H), 7.97 (d,  $J$  = 8.2 Hz, 2H).

<sup>13</sup>C NMR (CDCl<sub>3</sub>, 101 MHz)  $\delta$ : 21.23, 26.68, 56.93, 123.89 (q,  $J$  = 272.2 Hz), 124.75, 125.90 (q,  $J$  = 3.8 Hz), 127.72, 127.88, 129.00, 130.15 (q,  $J$  = 32.6 Hz), 133.46, 133.71, 136.65, 138.55, 144.64, 145.67, 166.99, 197.48.

<sup>19</sup>F NMR (CDCl<sub>3</sub>, 376 MHz)  $\delta$ : -63.87.

IR (KBr): 3294 s, 1688 s, 1636 s, 1604 s, 1519 s, 1423 m, 1358 m, 1326 s, 1268 s, 1237 m, 1158 s, 1117 s, 1068 s, 1017 s, 962 s, 862 s, 833 s, 815 s, 752 s, 687 s, 613 s, 588 s.

MS,  $m/z$  (relative intensity, %): 425 ( $M^+$ , 22), 292 (13), 134 (17), 133 (100), 105 (27).

HRMS (DART+,  $[M+H]^+$ ) Calcd for  $C_{25}H_{23}F_3NO_2$ : 426.1675. Found: 426.1676.

***N*-((4-Formylphenyl)(4-(trifluoromethyl)phenyl)methyl)-3,5-dimethylbenzamide (2hbd).**

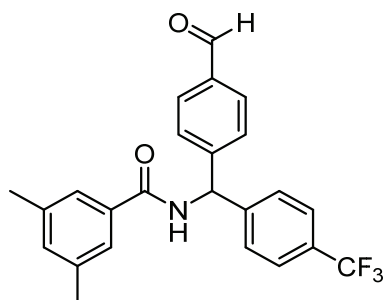

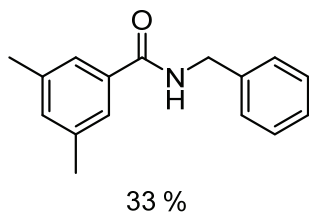

White solid (32.5 mg, 38%).  $R_f$  0.52 (SiO<sub>2</sub>, Hexane/EtOAc = 1/1). Mp 198.9-200.1 °C. The only detectable byproducts were hydrolysis products (*i.e.*, 33 % of *N*-benzyl-3,5-dimethylbenzamide was formed, as determined by GC using pentadecane as an internal standard).

<sup>1</sup>H NMR (CDCl<sub>3</sub>, 400 MHz)  $\delta$ : 2.35 (s, 6H), 6.54 (d,  $J$  = 7.8 Hz, 1H), 6.81 (br, 1H), 7.17 (s, 1H), 7.40-7.41 (m, 4H), 7.46 (d,  $J$  = 7.8 Hz, 2H), 7.62 (d,  $J$  = 8.2 Hz, 2H), 7.87 (d,  $J$  = 7.8 Hz, 2H), 9.99 (s, 1H).

<sup>13</sup>C NMR (CDCl<sub>3</sub>, 101 MHz)  $\delta$ : 21.20, 57.01, 123.84 (q,  $J$  = 272.2 Hz), 124.79, 125.94 (q,  $J$  = 3.8 Hz), 127.95, 128.12, 130.22 (q,  $J$  = 32.6 Hz), 130.30, 133.34, 133.76, 135.85, 138.54, 144.41, 147.18, 167.09, 191.62.

<sup>19</sup>F NMR (CDCl<sub>3</sub>, 376 MHz)  $\delta$ : -63.87.

IR (KBr): 3286 s, 1698 s, 1635 s, 1605 s, 1530 m, 1327 s, 1212 m, 1164 s, 1121 s, 1068 s, 1017 s, 863 s, 826 s, 807 s, 769 m, 692 m, 611m.

MS,  $m/z$  (relative intensity, %): 412 (13), 411 (M<sup>+</sup>, 43), 134 (19), 133 (100), 105 (23).

HRMS (DART<sup>+</sup>, [M+H]<sup>+</sup>) Calcd for C<sub>24</sub>H<sub>21</sub>F<sub>3</sub>NO<sub>2</sub>: 412.1519. Found: 412.1513.

***N*-(Benzo[*d*][1,3]dioxol-5-yl(4-(trifluoromethyl)phenyl)methyl)-3,5-dimethylbenzamide (2ibd).**

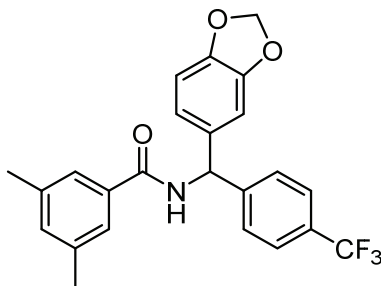

White solid (58.1 mg, 67%).  $R_f$  0.60 (SiO<sub>2</sub>, Hexane/EtOAc = 1/1). Mp 176.0-176.4 °C.

<sup>1</sup>H NMR (CDCl<sub>3</sub>, 400 MHz)  $\delta$ : 2.33 (s, 6H), 5.94 (d,  $J$  = 0.9 Hz, 2H), 6.34 (d,  $J$  = 7.3 Hz, 1H), 6.71-6.78 (m, 4H), 7.14 (s, 1H), 7.39-7.41 (m, 4H), 7.57 (d,  $J$  = 8.2 Hz, 2H).

<sup>13</sup>C NMR (CDCl<sub>3</sub>, 101 MHz)  $\delta$ : 21.16, 56.94, 101.27, 108.09, 108.47, 121.22, 124.02 (q,  $J$  = 272.2 Hz), 124.77, 125.56 (q,  $J$  = 2.9 Hz), 127.45, 129.57 (q,  $J$  = 32.3 Hz), 133.46, 133.68, 134.58, 138.37, 145.46, 147.28, 148.12, 166.92.

<sup>19</sup>F NMR (CDCl<sub>3</sub>, 376 MHz)  $\delta$ : -63.74.

IR (KBr): 3289 s, 1634 s, 1603 s, 1526 s, 1504 s, 1487 s, 1328 s, 1251 s, 1164 s, 1124 s, 1072 m, 1039 m, 939 m, 859 s, 798 m, 711 m, 662 w.



MS,  $m/z$  (relative intensity, %): 428 (12), 427 ( $M^+$ , 42), 294 (24), 134 (38), 133 (100), 105 (35), 79 (13).

HRMS (DART+,  $[M+H]^+$ ) Calcd for  $C_{24}H_{21}F_3NO_3$ : 428.1468. Found: 428.1469.

**3,5-Dimethyl-*N*-(*o*-tolyl(4-(trifluoromethyl)phenyl)methyl)benzamide (2jbd).**

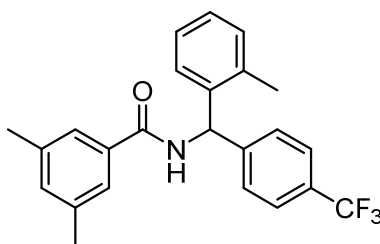

White solid (25.6 g, 30%).  $R_f$  0.64 ( $SiO_2$ , Hexane/EtOAc = 1/1). Mp 192.7-193.3 °C.

$^1H$  NMR ( $CDCl_3$ , 400 MHz)  $\delta$ : 2.36 (s, 6H), 2.40 (s, 3H), 6.54 (d,  $J = 7.3$  Hz, 1H), 6.66 (d,  $J = 7.3$  Hz, 1H), 7.03 (d,  $J = 7.3$  Hz, 1H), 7.16 (s, 1H), 7.19 (q,  $J = 4.1$  Hz, 1H), 7.25 (d,  $J = 5.0$  Hz, 2H), 7.38-7.41 (m, 4H), 7.59 (d,  $J = 8.2$  Hz, 2H).

$^{13}C$  NMR ( $CDCl_3$ , 101 MHz)  $\delta$ : 19.48, 21.21, 54.03, 124.05 (q,  $J = 271.3$  Hz), 124.73, 125.58 (q,  $J = 3.8$  Hz), 126.45, 127.30, 127.63, 128.08, 129.57 (q,  $J = 32.3$  Hz), 131.06, 133.52, 133.61, 136.72, 138.46, 138.80, 145.17, 166.77.

$^{19}F$  NMR ( $CDCl_3$ , 376 MHz)  $\delta$ : -63.74.

IR (KBr): 3294 s, 3043 m, 2917 m, 1637 s, 1527 m, 1325 m, 1244 m, 1170 s, 1126 s, 1068 m, 1018 m, 865 s, 835 s, 755 s, 732 s, 613 s, 449 m.

MS,  $m/z$  (relative intensity, %): 397 ( $M^+$ , 32), 179 (47), 134 (17), 133 (100), 105 (39), 79 (15), 77 (12).

HRMS (DART+,  $[M+H]^+$ ) Calcd for  $C_{24}H_{23}F_3NO$ : 398.1726. Found: 398.1727.

**3,5-Dimethyl-*N*-(quinolin-3-yl(4-(trifluoromethyl)phenyl)methyl)benzamide (2kbd).**

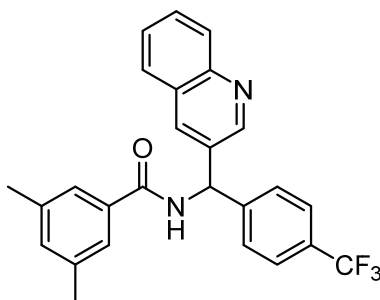

White solid (48.6 mg, 57%).  $R_f$  0.32 ( $SiO_2$ , Hexane/EtOAc = 1/1). Mp 211.2-211.5 °C.

$^1H$  NMR ( $CDCl_3$ , 400 MHz)  $\delta$ : 2.32 (s, 6H), 6.67 (d,  $J = 7.3$  Hz, 1H), 7.02 (d,  $J = 7.8$  Hz, 1H), 7.15 (s, 1H), 7.43 (s, 2H), 7.46 (d,  $J = 8.2$  Hz, 2H), 7.55 (t,  $J = 7.6$  Hz, 1H), 7.63 (d,  $J = 7.8$  Hz, 2H), 7.73 (t,  $J = 7.8$  Hz, 1H), 7.77 (s, 1H), 7.97 (s, 1H), 8.10 (d,  $J = 8.2$  Hz, 1H), 8.91 (br, 1H).

$^{13}\text{C}$  NMR ( $\text{CDCl}_3$ , 101 MHz)  $\delta$ : 21.15, 55.22, 123.86 (q,  $J = 272.2$  Hz), 124.85, 125.93 (q,  $J = 2.9$  Hz), 127.26, 127.51, 127.84, 129.09, 129.93, 130.19 (q,  $J = 32.6$  Hz), 133.32, 133.41, 133.70, 134.47, 138.48, 144.11, 147.43, 150.24, 167.15.

$^{19}\text{F}$  NMR ( $\text{CDCl}_3$ , 376 MHz)  $\delta$ : -63.84.

IR (KBr): 3268 s, 1642 s, 1603 m, 1524 s, 1495 m, 1329 s, 1242 m, 1166 s, 1119 s, 1071 s, 1018 m, 862 s, 785 m, 754 s, 749 s, 717 m.

MS,  $m/z$  (relative intensity, %): 434 ( $\text{M}^+$ , 14), 301 (27), 207 (10), 134 (16), 133 (100), 105 (39), 79 (15), 77 (13).

HRMS (DART+,  $[\text{M}+\text{H}]^+$ ) Calcd for  $\text{C}_{26}\text{H}_{22}\text{F}_3\text{N}_2\text{O}$ : 435.1679. Found: 435.1686.

**3,5-Dimethyl-*N*-((9-methyl-9H-carbazol-2-yl)(4-(trifluoromethyl)phenyl)methyl)benzamide (2lbd).**

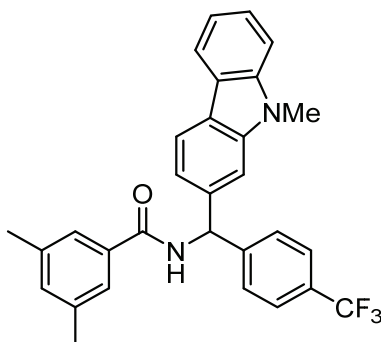

White solid (65.6 mg, 67%).  $R_f$  0.56 ( $\text{SiO}_2$ , Hexane/EtOAc = 1/1). Mp 235.8-237.0 °C.

$^1\text{H}$  NMR ( $\text{CDCl}_3$ , 400 MHz)  $\delta$ : 2.33 (s, 6H), 3.78 (s, 3H), 6.65 (d,  $J = 7.3$  Hz, 1H), 6.84 (d,  $J = 7.3$  Hz, 1H), 7.10 (dd,  $J = 8.2, 1.4$  Hz, 1H), 7.14 (s, 1H), 7.21-7.25 (m, 1H), 7.29 (s, 1H), 7.38 (d,  $J = 8.2$  Hz, 1H), 7.43 (s, 2H), 7.46-7.49 (m, 3H), 7.59 (d,  $J = 8.2$  Hz, 2H), 8.04-8.07 (m, 2H).

$^{13}\text{C}$  NMR ( $\text{CDCl}_3$ , 101 MHz)  $\delta$ : 21.19, 29.12, 57.93, 108.11, 108.55, 118.36, 119.18, 120.34, 120.87, 122.23, 122.52, 124.09 (q,  $J = 272.2$  Hz), 124.79, 125.53 (q,  $J = 3.8$  Hz), 126.01, 127.55, 129.49 (q,  $J = 32.6$  Hz), 133.46, 133.83, 138.35, 138.41, 141.07, 141.40, 145.86, 166.96.

$^{19}\text{F}$  NMR ( $\text{CDCl}_3$ , 376 MHz)  $\delta$ : -63.65.

IR (KBr): 3263 s, 3061 m, 2919 m, 1634 s, 1604 s, 1539 s, 1497 m, 1468 m, 1454 m, 1420 m, 1323 s, 1254 s, 1165 s, 1123 s, 1069 s, 1017 m, 862 s, 834 m, 818 s, 748 s, 726 s, 684 w, 666 w, 654 m, 618 m, 506 m, 449 m.

MS,  $m/z$  (relative intensity, %): 487 (20), 486 ( $\text{M}^+$ , 62), 354 (23), 353 (100), 182 (18), 167 (16), 134 (26), 133 (74), 105 (35), 79 (12).

HRMS (DART+,  $[\text{M}+\text{H}]^+$ ) Calcd for  $\text{C}_{30}\text{H}_{26}\text{F}_3\text{N}_2\text{O}$ : 487.1992. Found: 487.1993.

**Methyl 4-((3,5-dimethylbenzamido)(4-methoxyphenyl)methyl)benzoate (2ccd).**

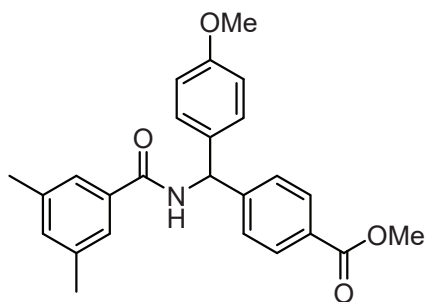

White solid (50.2 mg, 62%).  $R_f$  0.48 (SiO<sub>2</sub>, Hexane/EtOAc = 1/1). Mp 184.2-184.5 °C.

<sup>1</sup>H NMR (CDCl<sub>3</sub>, 400 MHz)  $\delta$ : 2.34 (s, 6H), 3.79 (s, 3H), 3.90 (s, 3H), 6.41 (d,  $J$  = 7.3 Hz, 1H), 6.66 (d,  $J$  = 7.8 Hz, 1H), 6.86-6.89 (m, 2H), 7.14 (s, 1H), 7.16-7.19 (m, 2H), 7.38 (d,  $J$  = 8.2 Hz, 2H), 7.40 (s, 2H), 7.99-8.01 (m, 2H).

<sup>13</sup>C NMR (CDCl<sub>3</sub>, 101 MHz)  $\delta$ : 21.20, 52.10, 55.28, 56.71, 114.213, 124.74, 127.15, 128.97, 129.12, 129.90, 133.00, 133.37, 133.90, 138.36, 146.78, 159.16, 166.79, 166.84.

IR (KBr): 3304 s, 2949 w, 1729 s, 1636 s, 1604 m, 1529 s, 1515 s, 1457 w, 1435 m, 1274 s, 1251 s, 1186 m, 1106 m, 1036 w, 1020 m, 864 m, 810 m, 764 m, 736 m, 699 m.

MS,  $m/z$  (relative intensity, %): 404 (13), 403 (M<sup>+</sup>, 45), 270 (30), 134 (30), 133 (100), 105 (30), 79 (10).

HRMS (DART+, [M+H]<sup>+</sup>) Calcd for C<sub>25</sub>H<sub>26</sub>NO<sub>4</sub>: 404.1856. Found: 404.1851.

***N*-(Bis(4-methoxyphenyl)methyl)-3,5-dimethylbenzamide (2ced).**

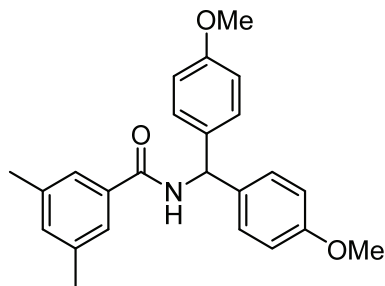

White solid (37.5 mg, 48%).  $R_f$  0.48 (SiO<sub>2</sub>, Hexane/EtOAc = 1/1). Mp 180.2-182.3 °C.

<sup>1</sup>H NMR (CDCl<sub>3</sub>, 400 MHz)  $\delta$ : 2.34 (s, 6H), 3.79 (s, 3H), 3.90 (s, 3H), 6.34 (d,  $J$  = 7.8 Hz, 1H), 6.57 (d,  $J$  = 7.8 Hz, 1H), 6.85-6.89 (m, 4H), 7.13 (s, 1H), 7.19-7.22 (m, 4H), 7.40 (s, 2H).

<sup>13</sup>C NMR (CDCl<sub>3</sub>, 101 MHz)  $\delta$ : 21.21, 55.27, 56.17, 113.98, 124.72, 128.59, 133.18, 133.91, 134.27, 138.28, 158.83, 166.69.

IR (KBr): 3326 s, 3004 m, 2931 m, 2833 s, 1635 s, 1605 s, 1508 s, 1463 m, 1323 m, 1306 m, 1281 m, 1238 s, 1176 s, 1111 m, 1032 s, 862 s, 815 s, 767 m, 687 s, 669 m, 582 s, 569 m.

MS,  $m/z$  (relative intensity, %): 376 (23), 375 (M<sup>+</sup>, 84), 243 (12), 242 (60), 227 (30), 226 (18), 211 (16), 207 (12), 134 (70), 133 (100), 105 (39), 103 (10), 79 (18), 77 (16).

HRMS (DART+, [M+H]<sup>+</sup>) Calcd for C<sub>24</sub>H<sub>26</sub>NO<sub>3</sub>: 376.1907. Found: 376.1904.

***N*-((4-Methoxyphenyl)(thiophen-2-yl)methyl)-3,5-dimethylbenzamide (2cfd).**

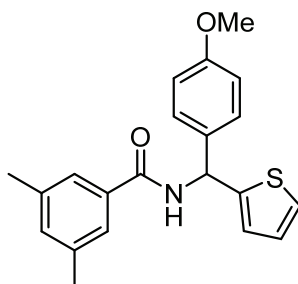

White solid (45.0 mg, 59%). R<sub>f</sub> 0.60 (SiO<sub>2</sub>, Hexane/EtOAc = 1/1). Mp 174.0-175.1 °C.

<sup>1</sup>H NMR (CDCl<sub>3</sub>, 400 MHz) δ: 2.34 (s, 6H), 3.80 (s, 3H), 6.59 (d, *J* = 8.2 Hz, 1H), 6.74 (d, *J* = 7.8 Hz, 1H), 6.86-6.96 (m, 4H), 7.13 (s, 1H), 7.23-7.25 (m, 1H), 7.31-7.33 (m, 2H), 7.40 (s, 2H).

<sup>13</sup>C NMR (CDCl<sub>3</sub>, 101 MHz) δ: 21.19, 52.75, 55.26, 114.01, 124.77, 125.06, 125.73, 126.89, 128.38, 133.28, 133.35, 134.03, 138.30, 146.20, 159.17, 166.57.

IR (KBr): 3287 s, 3042 w, 2999 m, 2964 w, 2833 w, 1639 s, 1604 s, 1535 s, 1512 s, 1462 m, 1379 m, 1342 m, 1284 m, 1244 s, 1183 s, 1029 s, 859 s, 839 m, 801 m, 697 s, 533 w.

MS, *m/z* (relative intensity, %): 352 (17), 351 (M<sup>+</sup>, 69), 218 (42), 203 (15), 202 (11), 187 (17), 134 (156), 133 (100), 115 (11), 110 (12), 105 (41), 103 (11), 79 (19), 77 (17).

HRMS (DART+, [M+H]<sup>+</sup>) Calcd for C<sub>21</sub>H<sub>22</sub>NO<sub>2</sub>S: 352.1366. Found: 352.1359.

**3,5-Dimethyl-*N*-(naphthalen-2-yl(o-tolyl)methyl)benzamide (2add).**

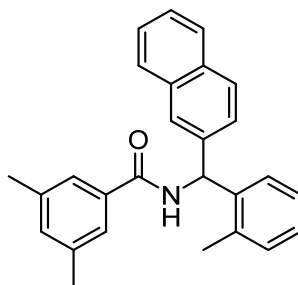

The general procedure was followed, except that the reaction temperature was 180 °C in dibutyl ether.

White solid (31.2 mg, 42%). R<sub>f</sub> 0.58 (SiO<sub>2</sub>, Hexane/EtOAc = 1/1). Mp 157.6-158.3 °C.

<sup>1</sup>H NMR (CDCl<sub>3</sub>, 400 MHz) δ: 2.35 (s, 6H), 2.38 (s, 3H), 6.64 (d, *J* = 7.8 Hz, 1H), 6.77 (d, *J* = 7.8 Hz, 1H), 7.14 (s, 1H), 7.18-7.24 (m, 4H), 7.39 (dd, *J* = 8.2 Hz, *J* = 1.8 Hz, 1H), 7.44 (s, 2H), 7.45-7.48 (m, 2H), 7.66 (s, 1H), 7.74-7.76 (m, 1H), 7.80-7.83 (m, 2H).

<sup>13</sup>C NMR (CDCl<sub>3</sub>, 101 MHz) δ: 19.53, 21.22, 54.48, 124.77, 125.87, 125.97, 126.02, 126.21, 126.23, 127.00, 127.60, 127.68, 127.95, 128.50, 130.90, 132.70, 133.24, 133.32, 133.99, 136.67, 138.37, 138.44, 139.34, 166.61.

IR (KBr): 3294 s, 3047 m, 2917 m, 1627 s, 1602 s, 1525 s, 1458 m, 1334 m, 1240 m, 1051 m, 912 m, 860 m, 820 m, 770 m, 751 s, 725 w, 696 m, 483 m, 477 m.

MS,  $m/z$  (relative intensity, %): 379 ( $M^+$ , 23), 246 (35), 230 (25), 229 (23), 228 (13), 215 (12), 207 (12), 134 (17), 133 (100), 127 (11), 118 (14), 105 (47), 103 (12), 91 (12), 79 (19), 77 (18), 73 (11).

HRMS (DART+,  $[M+H]^+$ ) Calcd for  $C_{27}H_{26}NO$ : 380.2009. Found: 380.2012.

## VI. Gram-Scale Reaction

### VI-1. Synthesis of the starting imidate 1mag

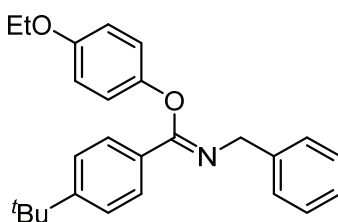

**4-Ethoxyphenyl *N*-benzyl-4-(tert-butyl)benzimidate (1mag).** This compound was prepared according to general procedure B. The product was obtained as a mixture of geometrical isomers (*E*:*Z* = 1:5.7), which was determined by  $^1H$  NMR.

Colorless oil (2.75 g, 71%).  $R_f$  0.60 (NH silica, Hexane/EtOAc = 1/1).

#### Major isomer

$^1H$  NMR ( $CDCl_3$ , 400 MHz)  $\delta$ : 1.28 (s, 9H), 1.37 (t,  $J = 7.1$  Hz, 3H), 3.94 (q,  $J = 7.0$  Hz, 2H), 4.73 (s, 2H), 6.75-6.86 (m, 4H), 7.30-7.34 (m, 4H), 7.40 (d,  $J = 7.8$  Hz, 2H), 7.48 (s, 1H), 7.76-7.79 (m, 2H).

$^{13}C$  NMR ( $CDCl_3$ , 101 MHz)  $\delta$ : 14.85, 31.12, 34.78, 51.63, 63.80, 115.44, 117.07, 125.26, 126.51, 127.76, 128.28, 128.52, 130.06, 140.14, 149.35, 153.91, 154.23, 154.27.

#### Minor isomer

$^1H$  NMR ( $CDCl_3$ , 400 MHz)  $\delta$ : 1.35 (s, 9H), 1.41 (t,  $J = 7.1$  Hz, 3H), 3.94 (q,  $J = 6.9$  Hz, 2H), 4.62 (s, 2H), 6.90-6.92 (m, 2H), 7.15-7.23 (m, 9H). Other peaks are overlapped with those of a major isomer.

$^{13}C$  NMR ( $CDCl_3$ , 101 MHz)  $\delta$ : 14.90, 31.19, 34.86, 53.48, 63.69, 114.79, 122.97, 125.38, 126.22, 126.69, 128.06, 128.15. Other peaks are overlapped with those of a major isomer.

#### *E/Z* Mixture

IR (KBr): 2964 m, 2903 m, 1660 s, 1608 w, 1503 m, 1477 m, 1269 m, 1242 m, 1202 s, 1186 s, 1112 m, 1062 s, 1017 w, 823 m, 778 w, 733 m, 697 m.

MS,  $m/z$  (relative intensity, %): 387 ( $M^+$ , 6), 251 (16), 250 (172), 161 (14), 116 (11), 109 (24), 92 (60), 91 (100), 65 (14).

HRMS (DART+,  $[M+H]^+$ ) Calcd for  $C_{26}H_{30}NO_2$ : 388.2271. Found: 388.2274.

### VI-2. Gram-Scale Reaction

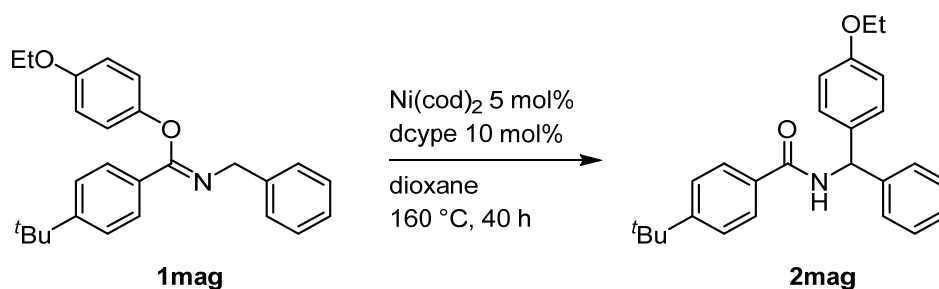

In a glovebox filled with nitrogen, aryl *N*-benzylimidate **1mag** (1.96 g, 5.0 mmol), Ni(cod)<sub>2</sub> (69.5 mg, 0.25 mmol), dcype (214.2 mg, 0.50 mmol) and 1,4-dioxane (25 mL) were added to a 200 mL vial with a Teflon-sealed screwcap. The mixture was stirred at 160 °C for 40 h. This mixture was then evaporated to dryness, and the residue was purified by flash column chromatography using hexane/EtOAc = 17/3 as the eluent to give **2mag** as a white solid (1.43 g, 73%).

**4-(*tert*-Butyl)-*N*-((4-ethoxyphenyl)(phenyl)methyl)benzamide (**2mag**).**

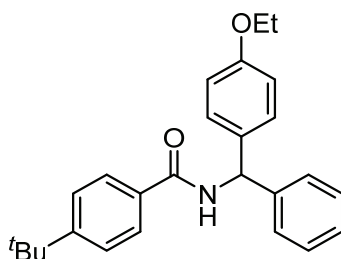

White solid (1.43 g, 73%). R<sub>f</sub> 0.60 (SiO<sub>2</sub>, Hexane/EtOAc = 1/1). Mp 166.1-166.9 °C.

<sup>1</sup>H NMR (CDCl<sub>3</sub>, 400 MHz) δ: 1.32 (s, 9H), 1.40 (t, *J* = 6.9 Hz, 3H), 4.00 (q, *J* = 7.0 Hz, 2H), 6.39 (d, *J* = 7.8 Hz, 1H), 6.68 (d, *J* = 7.8 Hz, 1H), 6.83-6.86 (m, 2H), 7.17-7.20 (m, 2H), 7.24-7.45 (m, 5H), 7.42-7.45 (m, 2H), 7.74-7.77 (m, 2H).

<sup>13</sup>C NMR (CDCl<sub>3</sub>, 101 MHz) δ: 14.79, 31.10, 34.88, 56.71, 63.39, 114.53, 125.47, 126.85, 127.32, 128.58, 128.71, 131.33, 133.53, 141.73, 155.09, 158.25, 166.27.

IR (KBr): 3308 s, 2965 s, 2908 m, 2869 m, 1628 s, 1539 s, 1507 s, 1455 m, 1361 m, 1322 m, 1303 m, 1243 s, 1173 s, 1116 m, 1048 s, 923 m, 855 m, 824 m, 747 m, 702 s.

MS, *m/z* (relative intensity, %): 388 (28), 387 (M<sup>+</sup>, 97), 310 (10), 227 (10), 226 (57), 211 (15), 181 (10), 162 (14), 161 (100), 146 (14), 123 (11), 118 (25), 105 (16), 104 (27), 91 (16).

HRMS (DART+, [M+H]<sup>+</sup>) Calcd for C<sub>26</sub>H<sub>30</sub>NO<sub>2</sub>: 388.2271. Found: 388.2271.

**VII. Additional Scope and Limitations**

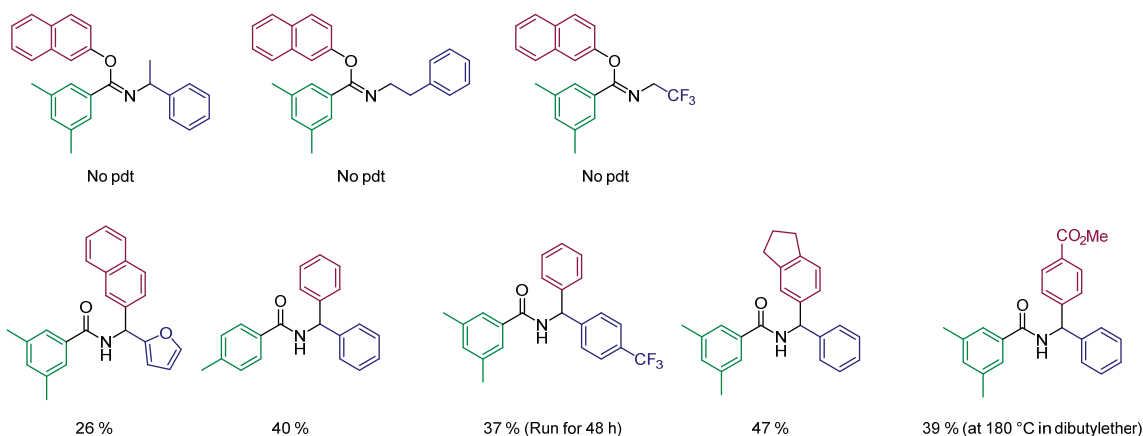

### VIII. Chapman Rearrangement of **1aaa**

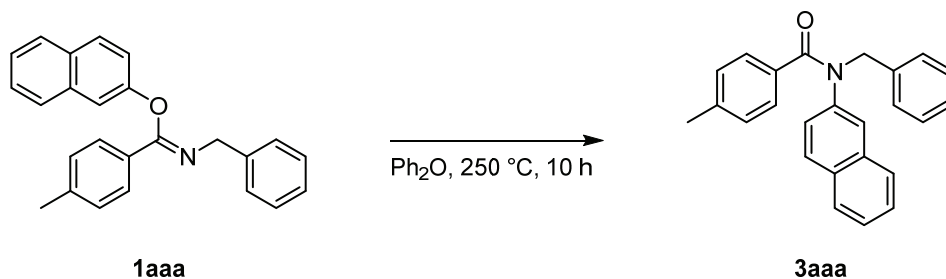

In a glovebox filled with nitrogen, imidate **1aaa** (71.1 mg, 0.20 mmol) and  $\text{Ph}_2\text{O}$  (1.5 mL) were added to a 5 mL pressure-resistant vial and it was closed with a resealable septum. The mixture was stirred at 250 °C for 10 h using a microwave reactor. This mixture was purified by flash column chromatography using hexane/EtOAc (1/9) as the eluent to give **3aaa** as a yellow oil (25.1 mg, 35%). ***N*-Benzyl-4-methyl-*N*-(naphthalen-2-yl)benzamide (3aaa)**.

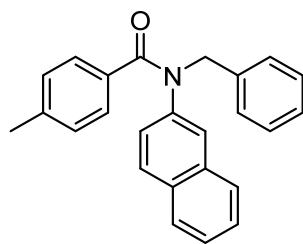

Yellow oil (25.1 mg, 35%).  $R_f$  0.58 ( $\text{SiO}_2$ , Hexane/EtOAc = 1/1).

$^1\text{H}$  NMR ( $\text{CDCl}_3$ , 400 MHz)  $\delta$ : 2.20 (s, 3H), 5.22 (s, 2H), 6.91 (d,  $J = 8.2$  Hz, 2H), 7.04 (dd,  $J = 8.7$ , 2.3 Hz, 1H), 7.22–7.35 (m, 7H), 7.39 (d,  $J = 2.3$  Hz, 1H), 7.41–7.44 (m, 2H), 7.61–7.63 (m, 2H), 7.72–7.74 (m, 1H).

$^{13}\text{C}$  NMR ( $\text{CDCl}_3$ , 101 MHz)  $\delta$ : 21.30, 54.15, 125.45, 126.12, 126.41, 127.30, 127.57, 127.76, 128.35, 128.45, 128.83, 128.96, 131.50, 132.84, 133.28, 137.63, 139.95, 141.31, 170.68.

IR (KBr): 3059 m, 2923 m, 1645 s, 1599 s, 1508 s, 1441 m, 1388 m, 1304 m, 1290 m, 1182 m, 832

m, 819 m, 748 s, 700 s.

MS,  $m/z$  (relative intensity, %): 351 ( $M^+$ , 21), 232 (26), 119 (100), 91 (60), 65 (12).

HRMS (DART+,  $[M+H]^+$ ) Calcd for  $C_{25}H_{22}NO$ : 352.1696. Found: 352.1695.

## IX. Crossover Experiments

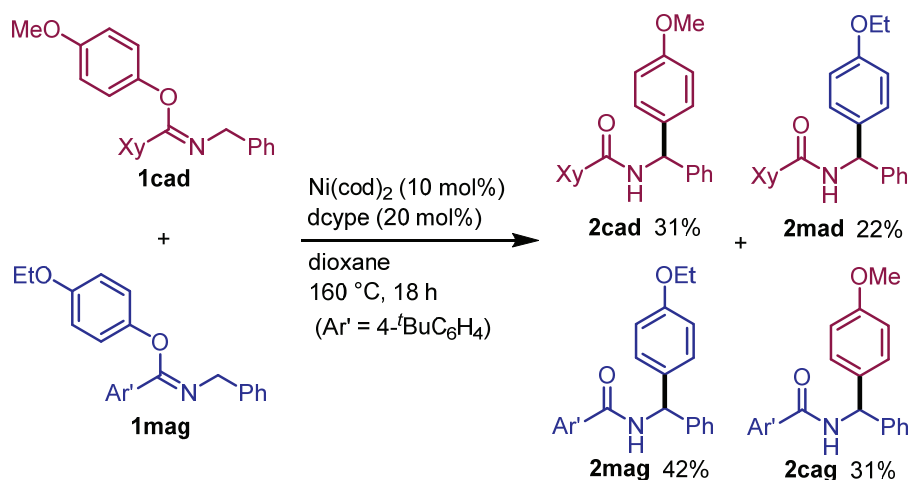

In a glovebox filled with nitrogen, aryl *N*-benzylimidates **1cad** (67.4 mg, 2.0 mmol) and **1mag** (76.2 mg, 2.0 mmol),  $Ni(cod)_2$  (12.6 mg, 0.46 mmol), *dcype* (34.9 mg, 0.83 mmol) and 1,4-dioxane (3 mL) were added to a 5 mL vial with a Teflon-sealed screwcap. The mixture was stirred at 160 °C for 18 h. The resulting mixture was then evaporated to dryness, and the residue was purified by flash column chromatography (eluent: hexane/EtOAc = 9/1 to 7/3) and GPC to give crossover products **2mad** (22%) and **2cag** (31%) and intramolecular migration products **2cad** (31%) and **2mag** (42%).

### 4-Methoxyphenyl *N*-benzyl-3,5-dimethylbenzimidate (**1cad**).

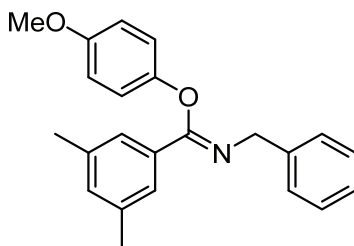

This compound was prepared according to general procedure A. The product was obtained as a mixture of geometrical isomers ( $E:Z = 1:5.4$ ), which was determined by  $^1H$  NMR.

Colorless oil (672 mg, 32%).  $R_f$  0.72 (NH silica, Hexane/EtOAc = 1/1).

*Major isomer*

$^1H$  NMR ( $CDCl_3$ , 400 MHz)  $\delta$ : 2.27 (s, 6H), 3.81 (s, 3H), 4.72 (s, 2H), 6.76-6.80 (m, 2H), 7.82-7.85



(m, 2H), 7.01 (s, 1H), 7.24-7.26 (m, 2H), 7.33 (t,  $J = 7.6$  Hz, 2H), 7.39-7.41 (m, 2H), 7.45 (s, 2H).

$^{13}\text{C}$  NMR ( $\text{CDCl}_3$ , 101 MHz)  $\delta$ : 21.22, 51.77, 55.58, 114.83, 117.14, 126.48, 126.58, 127.85, 128.32, 132.43, 132.82, 137.85, 140.01, 149.41, 154.76, 154.86.

*Minor isomer*

$^1\text{H}$  NMR ( $\text{CDCl}_3$ , 400 MHz)  $\delta$ : 2.36 (s, 6H), 3.81 (s, 3H), 4.56 (s, 2H), 6.91-6.93 (m, 2H), 7.10-7.12 (m, 4H), 7.15-7.18 (m, 5H). Other peaks are overlapped with those of a major isomer.

$^{13}\text{C}$  NMR ( $\text{CDCl}_3$ , 101 MHz)  $\delta$ : 21.31, 53.52, 55.52, 114.19, 122.99, 125.76, 126.22, 126.77, 128.13, 131.60, 138.14. Other peaks are overlapped with those of a major isomer.

*E/Z Mixture*

IR (KBr): 3003 w, 2914 m, 1734 w, 1655 s, 1604 m, 1504 s, 1454 m, 1317 m, 1244 m, 1203 s, 1178 s, 1091 m, 1035 m, 824 m, 774 w, 730 m, 698 m.

MS,  $m/z$  (relative intensity, %): 345 ( $\text{M}^+$ , 2), 222 (41), 92 (24), 91 (100), 65 (15).

HRMS (DART+,  $[\text{M}+\text{H}]^+$ ) Calcd for  $\text{C}_{23}\text{H}_{24}\text{NO}_2$ : 346.1802. Found: 346.1802.

***N*-((4-Methoxyphenyl)(phenyl)methyl)-3,5-dimethylbenzamide (2cad).**

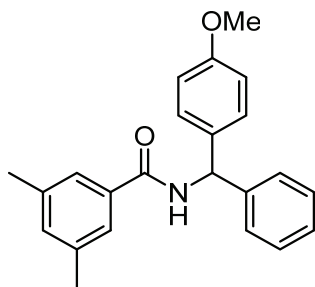

White solid (20.7 mg, 31%).  $R_f$  0.60 ( $\text{SiO}_2$ , Hexane/EtOAc = 1/1). Mp 160.3-160.6 °C.

$^1\text{H}$  NMR ( $\text{CDCl}_3$ , 400 MHz)  $\delta$ : 2.33 (s, 6H), 3.78 (d,  $J = 0.9$  Hz, 3H), 6.39 (d,  $J = 7.7$  Hz, 1H), 6.66 (d,  $J = 7.8$  Hz, 1H), 6.86 (d,  $J = 7.8$  Hz, 2H), 7.12 (s, 1H), 7.20 (d,  $J = 8.7$  Hz, 2H), 7.25-7.36 (m, 5H), 7.40 (s, 2H).

$^{13}\text{C}$  NMR ( $\text{CDCl}_3$ , 101 MHz)  $\delta$ : 21.19, 55.23, 56.69, 113.99, 124.72, 127.34, 128.59, 128.74, 133.18, 133.70, 134.19, 138.25, 141.68, 158.85, 166.73.

IR (KBr): 3339 s, 2918 m, 1634 s, 1601 s, 1539 s, 1515 s, 1465 m, 1305 m, 1238 s, 1183 s, 1120 m, 1034 s, 911 m, 861 s, 817 s, 789 m, 763 m, 726 s, 700 s, 573 s.

MS,  $m/z$  (relative intensity, %): 346 (18), 345 ( $\text{M}^+$ , 70), 212 (46), 197 (12), 134 (38), 133 (100), 105 (39), 104 (19), 79 (16), 77 (18).

HRMS (DART+,  $[\text{M}+\text{H}]^+$ ) Calcd for  $\text{C}_{23}\text{H}_{24}\text{NO}_2$ : 346.1802. Found: 346.1802.

***N*-((4-Ethoxyphenyl)(phenyl)methyl)-3,5-dimethylbenzamide (2mad).**

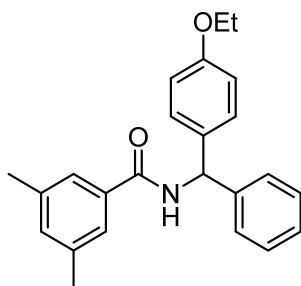

White solid (15.7 mg, 22%).  $R_f$  0.60 (SiO<sub>2</sub>, Hexane/EtOAc = 1/1). Mp 144.7-144.9 °C.

<sup>1</sup>H NMR (CDCl<sub>3</sub>, 400 MHz)  $\delta$ : 1.40 (t,  $J$  = 6.9 Hz, 3H), 2.35 (s, 6H), 4.01 (q,  $J$  = 7.0 Hz, 2H), 6.39 (d,  $J$  = 8.2 Hz, 1H), 6.60 (d,  $J$  = 7.3 Hz, 1H), 6.84-6.88 (m, 2H), 7.13 (s, 1H), 7.17-7.21 (m, 2H), 7.27-7.37 (m, 5H), 7.41 (s, 2H).

<sup>13</sup>C NMR (CDCl<sub>3</sub>, 101 MHz)  $\delta$ : 14.81, 21.22, 56.71, 63.41, 114.54, 124.72, 127.35, 128.61, 128.74, 133.21, 133.51, 134.20, 138.30, 141.70, 158.27, 166.72.

IR (KBr): 3292 s, 3031 m, 2978 m, 2918 m, 1635 s, 1602 s, 1508 s, 1475 m, 1327 m, 1304 m, 1243 s, 1176 s, 1116 m, 1048 s, 922 m, 861 m, 820 m, 759 m, 699 s, 597 m.

MS,  $m/z$  (relative intensity, %): 360 (17), 359 (M<sup>+</sup>, 64), 226 (44), 134 (25), 133 (100), 105 (38), 104 (17), 79 (14), 77 (14).

HRMS (DART+, [M+H]<sup>+</sup>) Calcd for C<sub>24</sub>H<sub>26</sub>NO<sub>2</sub>: 360.1958. Found: 360.1964.

**4-(*tert*-Butyl)-*N*-((4-methoxyphenyl)(phenyl)methyl)benzamide (2cag).**

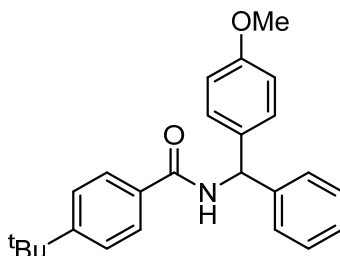

White solid (31.8 mg, 31%).  $R_f$  0.60 (SiO<sub>2</sub>, Hexane/EtOAc = 1/1). Mp 180.1-181.3 °C.

<sup>1</sup>H NMR (CDCl<sub>3</sub>, 400 MHz)  $\delta$ : 1.33 (s, 9H), 3.79 (d, 3H), 6.40 (d,  $J$  = 7.3 Hz, 1H), 6.62 (d,  $J$  = 7.8 Hz, 1H), 6.85-6.89 (m, 2H), 7.12-7.22 (m, 2H), 7.27-7.36 (m, 5H), 7.43-7.46 (m, 2H), 7.74-7.77 (m, 2H).

<sup>13</sup>C NMR (CDCl<sub>3</sub>, 101 MHz)  $\delta$ : 31.13, 34.91, 55.29, 56.77, 114.05, 125.54, 126.85, 127.33, 127.41, 128.65, 128.73, 131.33, 133.72, 141.70, 155.18, 158.91, 166.31.

IR (KBr): 3310 s, 2964 s, 2870 m, 1636 s, 1614 m, 1540 s, 1508 s, 1321 m, 1248 s, 1176 s, 1114 m, 1031 s, 853 s, 837 s, 800 m, 744 m, 696 s, 675 s, 621 m, 594 m, 546 m.

MS,  $m/z$  (relative intensity, %): 374 (27), 373 (M<sup>+</sup>, 100), 212 (58), 197 (20), 196 (10), 162 (14), 161 (97), 153 (12), 146 (14), 134 (13), 118 (25), 109 (14), 105 (17), 104 (29), 91 (19), 77 (12).

HRMS (DART+, [M+H]<sup>+</sup>) Calcd for C<sub>25</sub>H<sub>28</sub>NO<sub>2</sub>: 374.2115. Found: 374.2116.

## X. Kinetic Studies

### X-1. Synthesis of 1cad-d<sub>2</sub>.

This compound was prepared according to General Procedure A using amide derived from benzylamine-d<sub>2</sub>.

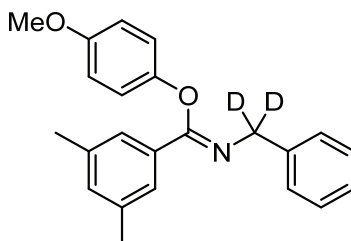

**4-Methoxyphenyl 3,5-dimethyl-N-(phenylmethyl-d<sub>2</sub>)benzimidate (1cad-d<sub>2</sub>).** The product was obtained as a mixture of geometrical isomers (*E*:*Z* = 1:5.2), which was determined by <sup>1</sup>H NMR.

Colorless oil (1.02 g, 65%, 97%D). R<sub>f</sub> 0.62 (NH silica, Hexane/EtOAc = 1/1).

#### Major isomer

<sup>1</sup>H NMR (CDCl<sub>3</sub>, 400 MHz) δ: 2.27 (s, 6H), 3.73 (s, 3H), 6.75-6.79 (m, 2H), 6.82-6.86 (m, 2H), 7.01 (s, 1H), 7.15-7.18 (m, 1H), 7.23-7.26 (m, 1H), 7.31-7.41 (m, 4H), 7.45 (s, 2H).

<sup>13</sup>C NMR (CDCl<sub>3</sub>, 101 MHz) δ: 21.20, 51.20 (m), 55.57, 114.83, 117.15, 126.49, 126.60, 127.89, 128.31, 132.43, 132.84, 137.83, 139.87, 149.43, 154.80, 154.86.

#### Minor isomer

<sup>1</sup>H NMR (CDCl<sub>3</sub>, 400 MHz) δ: 2.36 (s, 6H), 3.80 (s, 3H), 6.90-6.92 (m, 2H), 7.10-7.12 (m, 3H). Other peaks are overlapped with those of a major isomer.

<sup>13</sup>C NMR (CDCl<sub>3</sub>, 101 MHz) δ: 21.30, 55.51, 114.19, 122.99, 125.76, 126.25, 126.81, 128.13, 131.05, 131.59, 138.14, 140.86, 146.84, 156.34, 161.87.

#### E/Z Mixture

<sup>2</sup>H-NMR (CHCl<sub>3</sub>, 61.37 MHz) δ: 4.56 (minor), 4.73 (major).

IR (KBr): 2949 w, 2914 w, 1654 m, 1604 w, 1503 s, 1447 w, 1316 w, 1243 w, 1206 m, 1186 s, 1102 w, 1035 m, 823 w, 714 w.

MS, *m/z* (relative intensity, %): 347 (M<sup>+</sup>, 3), 225 (12), 224 (59), 123 (14), 94 (47), 93 (100), 92 (33), 66 (10).

HRMS (DART+, [M+H]<sup>+</sup>) Calcd for C<sub>23</sub>H<sub>22</sub>D<sub>2</sub>NO<sub>2</sub>: 348.1927. Found: 348.1936.

### X-2. Kinetic studies

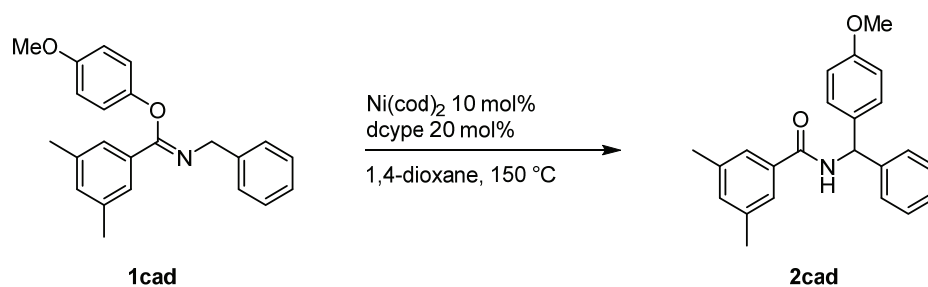

In a glovebox filled with nitrogen, imidate **1cad** (210.4 mg, 0.6 mmol), Ni(cod)<sub>2</sub> (16.2 mg, 0.06 mmol), dcype (51.4 mg, 0.12 mmol) and 1,4-dioxane (4.5 mL) were added to a 30 mL pressure-resistant vial and it was closed with a resealable septum. The mixture was stirred at 150 °C. An aliquot of the crude reaction mixture was taken through the septum using a syringe at the indicated time, was diluted with EtOAc and was analyzed by GC. The yields of **1cad** and **2cad** were determined based on the calibration curves. The same experiment was repeated twice.

| Time / s | Run 1         |      |                            | Run 2         |      |                            |
|----------|---------------|------|----------------------------|---------------|------|----------------------------|
|          | GC yields (%) |      | $\ln\{1-[2cad]/[1cad]_0\}$ | GC yields (%) |      | $\ln\{1-[2cad]/[1cad]_0\}$ |
|          | 1cad          | 2cad |                            | 1cad          | 2cad |                            |
| 0        | 98            | 0    | 0                          | 96            | 0    | 0                          |
| 1500     | 74            | 6    | -0.0665                    | 74            | 6    | -0.0694                    |
| 3600     | 71            | 13   | -0.140                     | 65            | 12   | -0.138                     |
| 5400     | 59            | 18   | -0.210                     | 59            | 16   | -0.184                     |
| 7200     | 49            | 20   | -0.222                     | 53            | 19   | -0.218                     |

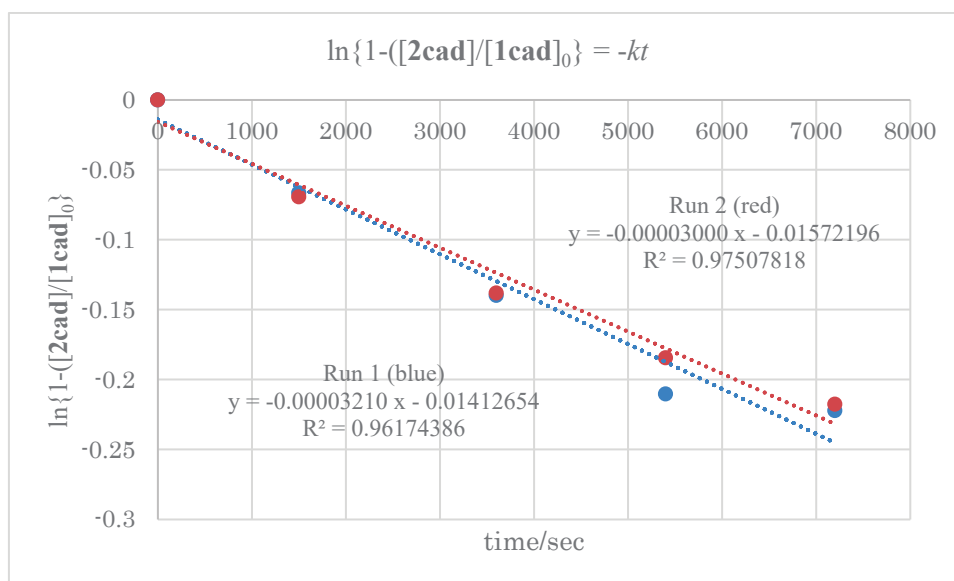

The same experiment was conducted using **1cad-d<sub>2</sub>** (213.2 mg, 0.61 mmol) as the substrate. The results

are summarized below.

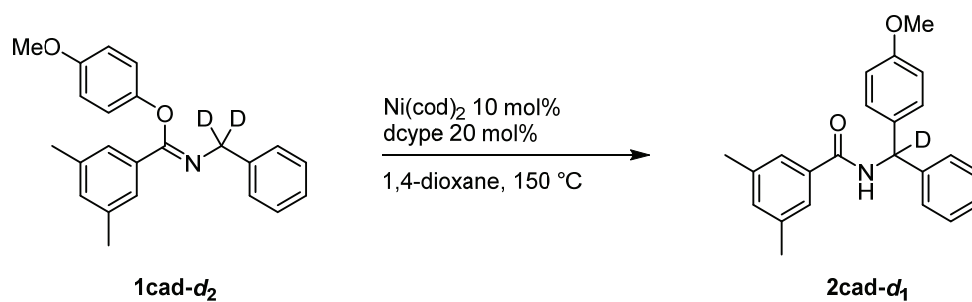

| Time / s | GC yields (%)                |                              | $\ln\{1 - [\text{2cad-}d_1]/[\text{1cad-}d_2]_0\}$ |
|----------|------------------------------|------------------------------|----------------------------------------------------|
|          | <b>1cad-<math>d_2</math></b> | <b>2cad-<math>d_1</math></b> |                                                    |
| 0        | 97                           | 0                            | 0                                                  |
| 1800     | 82                           | 3                            | -0.0320                                            |
| 3600     | 79                           | 4                            | -0.0421                                            |
| 5400     | 75                           | 5                            | -0.0552                                            |
| 7200     | 71                           | 7                            | -0.0754                                            |
| 10800    | 63                           | 11                           | -0.125                                             |
| 18000    | 53                           | 14                           | -0.160                                             |
| 25200    | 54                           | 18                           | -0.207                                             |
| 32400    | 46                           | 21                           | -0.241                                             |

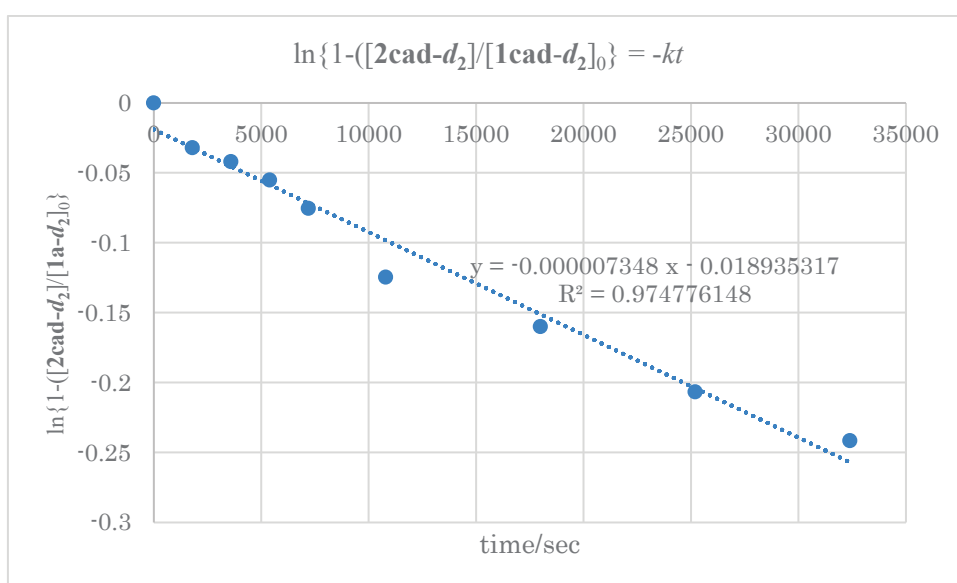

The reaction of **2cad** and **2cad-*d*<sub>2</sub>** followed first-order kinetics with respect to the concentration of the substrate. Rate constants for these reactions, which were determined by the slopes obtained in the ln(1-([substrate])/[starting material]<sub>0</sub>) vs time plot shown above, were summarized in the following table. The kinetic isotope effect ( $k_H/k_D$ ) was determined to be 4.2, indicating that the C–H bond cleavage process is involved in the turnover-limiting step in this catalytic reaction.

|                                | $k_{obs} / s^{-1}$ (Run 1) | $k_{obs} / s^{-1}$ (Run 2) | Average               | KIE |
|--------------------------------|----------------------------|----------------------------|-----------------------|-----|
| <b>1a</b>                      | $3.21 \times 10^{-5}$      | $3.00 \times 10^{-5}$      | $3.11 \times 10^{-5}$ | 4.2 |
| <b>1a-<i>d</i><sub>2</sub></b> | $7.35 \times 10^{-6}$      | --                         | $7.35 \times 10^{-6}$ |     |

***N*-((4-Methoxyphenyl)(phenyl)methyl-*d*)-3,5-dimethylbenzamide (**2cad-*d***).**

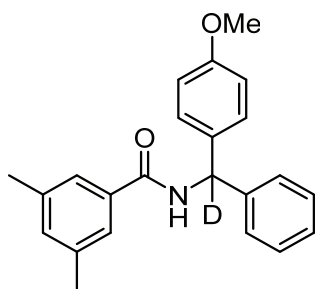

White solid (58.6 mg, 94%D).  $R_f$  0.52 (SiO<sub>2</sub>, Hexane/EtOAc = 1/1). Mp 161.4-162.0 °C.

<sup>1</sup>H NMR (CDCl<sub>3</sub>, 400 MHz)  $\delta$ : 2.34 (s, 6H), 3.78 (s, 3H), 6.64 (s, 1H), 6.87 (d,  $J$  = 7.8 Hz, 2H), 7.12 (s, 1H), 7.20 (d,  $J$  = 8.5 Hz, 2H), 7.29-7.34 (m, 5H), 7.40 (s, 2H).

<sup>13</sup>C NMR (CDCl<sub>3</sub>, 101 MHz)  $\delta$ : 21.19, 55.24, 56.39 (d,  $J$  = 20.6 Hz, **2cad-*d***), 56.71 (**2cad**), 113.91, 114.01, 124.73, 127.34, 128.61, 128.74, 133.19, 133.66, 134.22, 138.27, 141.64, 158.89, 166.75.

<sup>2</sup>H-NMR (CHCl<sub>3</sub>, 61.37 MHz)  $\delta$ : 6.39.

IR (KBr): 3335 s, 3054 w, 3004 w, 2918 m, 2838 w, 1628 s, 1600 s, 1531 s, 1512 s, 1465 m, 1298 m, 1246 s, 1182 m, 1035 s, 911 m, 861 m, 797 w, 764 w, 726 m, 701m, 644 w, 618 w, 582 m, 570 m.

MS,  $m/z$  (relative intensity, %): 347 (28), 346 (M<sup>+</sup>, 51), 214 (13), 213 (32), 198 (10), 134 (38), 133 (100), 105 (42), 104 (14), 79 (16), 77 (16).

HRMS (DART+, [M+H]<sup>+</sup>) Calcd for C<sub>23</sub>H<sub>23</sub>DNO<sub>2</sub>: 347.1864. Found: 347.1867.

## XI. The Reaction of **3cad** under Standard Conditions

### XI-1. Synthesis of **3cad**.<sup>3</sup>

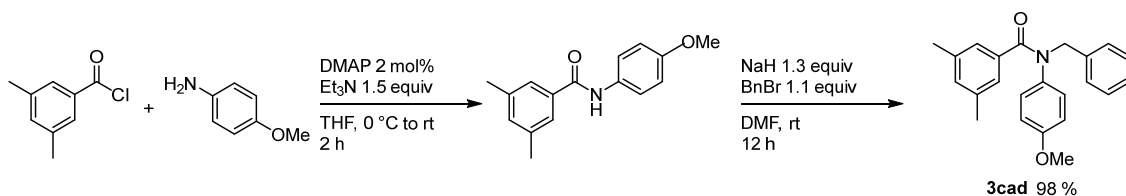

3,5-Dimethylbenzoyl chloride (1.71 g, 10.1 mmol) was added at 0 °C to a solution of 4-methoxyaniline (1.41 g, 11.4 mmol), Et<sub>3</sub>N (2.0 mL, 14.3 mmol) and DMAP (24.8 mg, 0.20 mmol) in THF (20 mL). The mixture was then allowed to warm to rt and stirred for 2 h. The mixture was quenched with an aqueous solution of HCl (1 M, 5 mL) and extracted with EtOAc (30 mL x 2). The combined organic layers were washed with brine, dried over Na<sub>2</sub>SO<sub>4</sub>, and concentrated under reduced pressure to afford corresponding amide (white solid), which was used in the next step without further purification. Benzyl bromide (2.20 g, 12.9 mmol) was added to a solution of NaH (60 % dispersion in paraffin liquid, 0.55 g, 13.3 mmol) and the amide in DMF (40 mL). After the addition was complete, the reaction mixture was stirred at rt for 12 h. The mixture was quenched with saturated aqueous solution of NaHCO<sub>3</sub> (100 mL) and extracted with hexane/Et<sub>2</sub>O = 1/1 (240 mL). The combined organic layers were washed three times with water (240 mL), dried over Na<sub>2</sub>SO<sub>4</sub>, and concentrated under reduced pressure. The crude residue was purified by flash column chromatography (eluent: hexane/EtOAc = 4/1 to 3/2) to give *N*-benzyl-*N*-(4-methoxyphenyl)-3,5-dimethylbenzamide (**3cad**) as a colorless oil (3.43 g, 98%).

***N*-Benzyl-*N*-(4-methoxyphenyl)-3,5-dimethylbenzamide (3cad).**

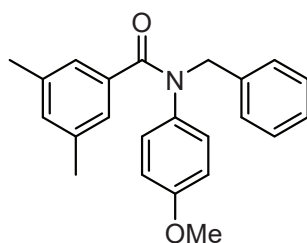

Colorless oil. *R*<sub>f</sub> 0.48 (SiO<sub>2</sub>, Hexane/EtOAc = 1/1).

<sup>1</sup>H NMR (CDCl<sub>3</sub>, 400 MHz) δ: 2.11 (s, 6H), 3.58 (s, 3H), 5.05 (s, 2H), 6.59 (d, *J* = 8.7 Hz, 2H), 6.78 (br, 3H), 6.94 (s, 2H), 7.16–7.29 (m, 5H).

<sup>13</sup>C NMR (CDCl<sub>3</sub>, 101 MHz) δ: 20.79, 53.53, 54.86, 113.69, 126.11, 126.96, 128.10, 128.25, 128.60, 130.74, 135.79, 135.92, 136.80, 137.39, 157.59, 170.59.

IR (KBr): 3031 m, 3005 m, 2918 m, 2837 w, 1640 s, 1604 s, 1584 m, 1510 s, 1440 s, 1389 s, 1325 s, 1298 m, 1249 s, 1212 m, 1180 m, 1108 w, 1080 w, 1029 m, 979 w, 890 w, 858 m, 837 s, 778 w, 755 s, 728 m, 701 s, 623 m, 553 m, 541 m.

MS, *m/z* (relative intensity, %): 346 (M<sup>+</sup>, 25), 345 (82), 344 (15), 212 (59), 196 (10), 134 (30), 133

(100), 105 (78), 103 (17), 91 (56), 79 (29), 77 (27), 65 (10).

HRMS (DART+, [M+H]<sup>+</sup>) Calcd for C<sub>23</sub>H<sub>24</sub>NO<sub>2</sub>: 346.1802. Found: 346.1811.

### XI-2. The reaction of **3cad** under the standard conditions

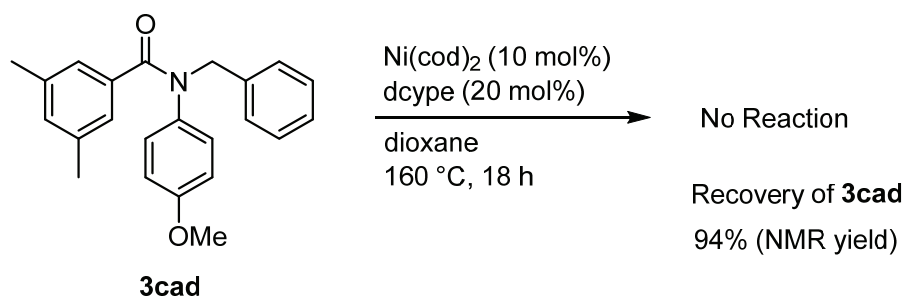

Yields were determined by <sup>1</sup>H NMR using 1,1,2,2-tetrachloroethane as an internal standard. This result rules out the intermediacy of a 1,3 aryl shift compound, such as **3cad**, in the 1,4 aryl shift reaction.

### XII. The Reaction of **1aaa** with Radical Scavengers

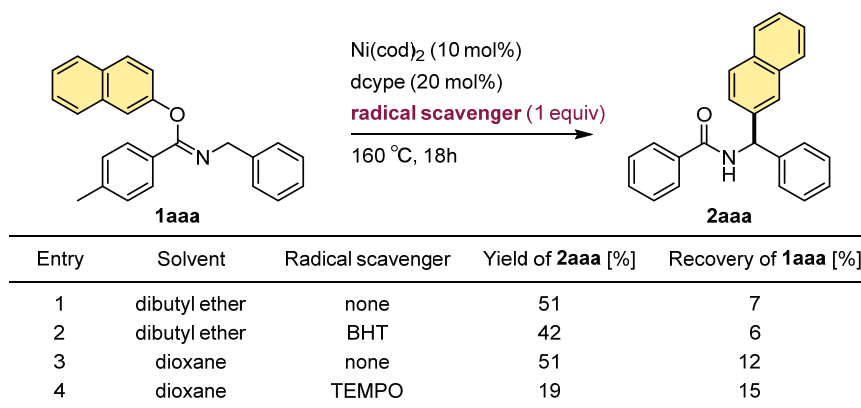

To rule out the radical pathway, the reaction was performed with radical scavengers. In a glovebox filled with nitrogen, aryl *N*-benzylimidate **1aaa** (73.5 mg, 0.21 mmol), Ni(cod)<sub>2</sub> (5.5 mg, 0.020 mmol), dcype (16.9 mg, 0.040 mmol), radical scavengers (1 equiv) and solvent (1.5 mL) were added to a 5 mL vial with a Teflon-sealed screwcap. The mixture was stirred at 160 °C for 18 h. Yields were determined by GC using pentadecane as an internal standard. In the presence of a radical scavenger, the reaction still proceeded, indicating that a radical pathway is unlikely.

### XIII. Synthetic Applications



**4-Methyl-2-oxo-2H-chromen-7-yl (3,5-dimethyl-N-(4-(trifluoromethyl)benzyl)benzimidate (1nbd).**

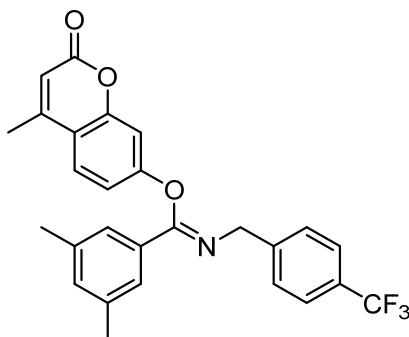

This imidate was synthesized according to the general procedure A using 4-methylumbelliferone (1.06 g, 6.0 mmol), except that the solvent was  $\text{CHCl}_3$ . This compound was obtained as a mixture of geometrical isomers ( $E:Z = 1:9.5$ ), which was determined by  $^1\text{H}$  NMR.

White solid (1.98 g, 85%).  $R_f$  0.72 (NH silica, Hexane/EtOAc = 1/1). Mp 52.2-55.5 °C.

*Major isomer*

$^1\text{H}$  NMR ( $\text{CDCl}_3$ , 400 MHz)  $\delta$ : 2.30 (s, 6H), 2.38 (d,  $J = 0.92$  Hz, 3H), 4.75 (s, 2H), 6.17 (d,  $J = 1.4$  Hz, 1H), 6.86–6.89 (m, 2H), 7.08 (s, 1H), 7.47 (s, 2H), 7.49–7.52 (m, 3H), 7.59 (d,  $J = 8.2$  Hz, 2H).

$^{13}\text{C}$  NMR ( $\text{CDCl}_3$ , 101 MHz)  $\delta$ : 18.64, 21.20, 51.35, 104.24, 112.56, 113.07, 115.28, 124.20 (q,  $J = 272.2$  Hz), 125.31 (q,  $J = 3.8$  Hz), 126.23, 127.92, 129.04 (q,  $J = 32.3$  Hz), 131.52, 133.32, 138.35, 143.36, 152.07, 153.54, 154.98, 157.85, 160.61.

*Minor isomer*

$^1\text{H}$  NMR ( $\text{CDCl}_3$ , 400 MHz)  $\delta$ : 2.39 (s, 6H), 2.45 (d,  $J = 1.4$  Hz, 3H), 4.63 (s, 2H), 6.26 (d,  $J = 1.4$  Hz, 1H), 7.15 (s, 3H), 7.20–7.23 (m, 1H), 7.27–7.29 (m, 3H). Other peaks are overlapped with those of a major isomer.

$^{13}\text{C}$  NMR ( $\text{CDCl}_3$ , 101 MHz)  $\delta$ : 18.74, 21.29, 53.25, 110.81, 113.92, 116.99, 118.87, 125.05, 125.67, 127.02, 129.92, 132.23, 138.49, 144.35, 152.21, 154.30, 156.03, 160.86, 161.33. Other peaks are overlapped with those of a major isomer.

*E/Z Mixture*

$^{19}\text{F}$  NMR ( $\text{CDCl}_3$ , 376 MHz)  $\delta$ : -63.62.

IR (KBr): 3058 w, 2920 m, 2868 w, 1734 s, 1666 s, 1610 s, 1564 m, 1505 m, 1418 s, 1387 s, 1325 s, 1267 s, 1133 s, 1066 s, 1016 s, 851 s, 821 s, 685 m.

MS,  $m/z$  (relative intensity, %): 465 ( $\text{M}^+$ , 9), 134 (10), 133 (100), 105 (24).

HRMS (DART+,  $[\text{M}+\text{H}]^+$ ) Calcd for  $\text{C}_{27}\text{H}_{23}\text{F}_3\text{NO}_3$ : 466.1625. Found: 466.1636.

**3,5-Dimethyl-N-((4-methyl-2-oxo-2H-chromen-7-yl)(4-(trifluoromethyl)phenyl)methyl) benzamide (2nbd).**

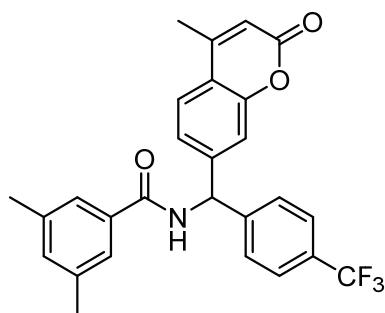

The typical procedure was followed using **1nbd** (96.8 mg, 0.21 mmol).

White solid (49.5 mg, 51%).  $R_f$  0.32 (SiO<sub>2</sub>, Hexane/EtOAc = 1/1). Mp 208.3-210.3 °C.

<sup>1</sup>H NMR (CDCl<sub>3</sub>, 400 MHz)  $\delta$ : 2.35 (s, 6H), 2.42 (d,  $J$  = 0.92 Hz, 3H), 6.25 (d,  $J$  = 0.92 Hz, 1H), 6.55 (d,  $J$  = 7.8 Hz, 1H), 6.89 (d,  $J$  = 7.3 Hz, 1H), 7.16 (s, 1H), 7.24 (dd,  $J$  = 8.2, 1.8 Hz, 1H), 7.30 (d,  $J$  = 1.4 Hz, 1H), 7.42-7.45 (m, 4H), 7.59 (d,  $J$  = 8.2 Hz, 1H), 7.62 (d,  $J$  = 8.2 Hz, 2H).

<sup>13</sup>C NMR (CDCl<sub>3</sub>, 101 MHz)  $\delta$ : 18.64, 21.21, 56.73, 115.09, 115.53, 119.39, 123.69, 123.83 (q,  $J$  = 272.2 Hz), 124.82, 125.16, 125.96 (q,  $J$  = 3.8 Hz), 128.02, 130.29 (q,  $J$  = 32.6 Hz), 133.33, 133.73, 138.50, 144.32, 145.13, 152.07, 153.74, 160.52, 167.17.

<sup>19</sup>F NMR (CDCl<sub>3</sub>, 376 MHz)  $\delta$ : -63.90.

IR (KBr): 3248 s, 3064 m, 1723 s, 1634 s, 1602 s, 1539 s, 1417 m, 1386 m, 1327 s, 1176 m, 1115 s, 1069 m, 1017 m, 888 m, 861 s, 819 m, 750 m, 712 s, 683 m.

MS,  $m/z$  (relative intensity, %): 465 (M<sup>+</sup>, 30), 332 (16), 134 (31), 133 (100), 105 (31).

HRMS (DART+, [M+H]<sup>+</sup>) Calcd for C<sub>27</sub>H<sub>23</sub>F<sub>3</sub>NO<sub>3</sub>: 466.1625. Found: 466.1619.

**13-Methyl-17-oxo-7,8,9,11,12,13,14,15,16,17-decahydro-6H-cyclopenta[*a*]phenanthren-3-yl 3,5-dimethyl-*N*-(4-(trifluoromethyl)benzyl)benzimidate (1obd).**

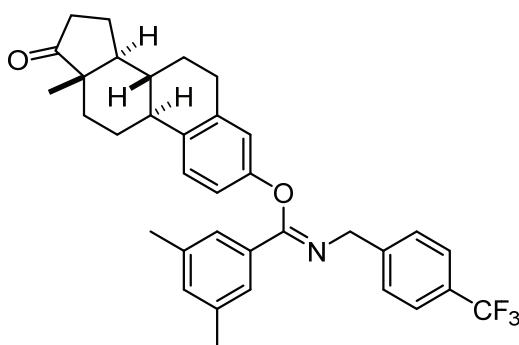

This imidate was synthesized according to the general procedure A using estrone (1.18 g, 4.4 mmol, 1.1 equiv), except that the solvent was CHCl<sub>3</sub>. The product was obtained as a mixture of geometrical isomers ( $E:Z$  = 1:8.3), which was determined by <sup>1</sup>H NMR.

White solid (1.21 g, 54%).  $R_f$  0.76 (NH silica, Hexane/EtOAc = 1/1). Mp 74.4-78.2 °C.

*Major isomer*

$^1\text{H}$  NMR ( $\text{CDCl}_3$ , 400 MHz)  $\delta$ : 0.90 (s, 3H), 1.37-1.66 (m, 7H), 1.93-2.22 (m, 5H), 2.30 (s, 6H), 2.47-2.54 (m, 1H), 2.79-2.81 (m, 2H), 4.72 (s, 2H), 6.62 (d,  $J = 2.8$  Hz, 1H), 6.72 (dd,  $J = 8.2, 2.8$  Hz, 1H), 7.06 (s, 1H), 7.17 (d,  $J = 8.7$  Hz, 1H), 7.49-7.52 (m, 4H), 7.56-7.58 (m, 2H).

$^{13}\text{C}$  NMR ( $\text{CDCl}_3$ , 101 MHz)  $\delta$ : 13.81, 21.24, 21.52, 25.74, 26.31, 29.44, 31.48, 35.81, 38.05, 43.93, 47.92, 50.33, 51.36, 113.33, 115.74, 124.28 (q,  $J = 272.2$  Hz), 125.17 (q,  $J = 3.8$  Hz), 126.32, 126.81, 127.96, 128.80 (q,  $J = 31.6$  Hz), 132.64, 132.84, 134.03, 138.00, 138.45, 144.03, 153.31, 155.10, 220.84.

*Minor isomer*

$^1\text{H}$  NMR ( $\text{CDCl}_3$ , 400 MHz)  $\delta$ : 0.93 (s, 3H), 2.37 (s, 6H), 2.93-2.95 (m, 2H), 4.61 (s, 2H), 6.97-6.98 (m, 1H), 7.11 (s, 3H), 7.29-7.33 (m, 3H). Other peaks are overlapped with those of a major isomer.

$^{13}\text{C}$  NMR ( $\text{CDCl}_3$ , 101 MHz)  $\delta$ : 21.30, 26.44, 31.53, 44.16, 47.97, 50.41, 53.22, 119.38, 122.06, 125.04 (q,  $J = 3.8$  Hz), 125.68, 126.16, 127.00, 130.81, 131.81, 136.17, 137.62, 138.28, 145.14, 151.07, 162.43. Other peaks are overlapped with those of a major isomer.

*E/Z Mixture*

$^{19}\text{F}$  NMR ( $\text{CDCl}_3$ , 376 MHz)  $\delta$ : -63.56.

IR (KBr): 2929 m, 2865 m, 1740 s, 1659 m, 1605 m, 1493 m, 1455 w, 1417 m, 1324 s, 1229 m, 1161 s, 1122 s, 1066 s, 1018 m, 820 m.

HRMS (DART+,  $[\text{M}+\text{H}]^+$ ) Calcd for  $\text{C}_{35}\text{H}_{37}\text{F}_3\text{NO}_2$ : 560.2771. Found: 560.2781.

**3,5-Dimethyl-*N*-((14-methyl-15-oxo-7,8,9,11,12,13,14,15,16,17-decahydro-6*H*-cyclopenta[*a*]phenanthren-3-yl)(4-(trifluoromethyl)phenyl)methyl)benzamide (2obd).**

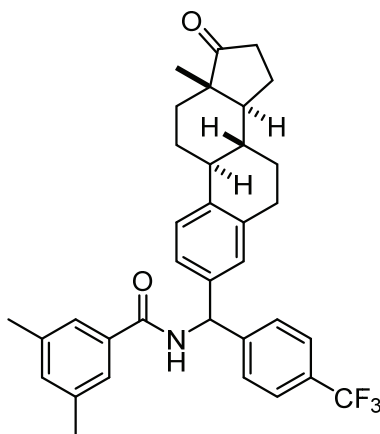

The typical procedure was followed using **1nbd** (111.8 mg, 0.20 mmol).

White solid (66.1 mg, 59%).  $R_f$  0.48 ( $\text{SiO}_2$ , Hexane/EtOAc = 1/1). M.p. 142.7-144.4 °C.

$^1\text{H}$  NMR ( $\text{CDCl}_3$ , 400 MHz)  $\delta$ : 0.90 (s, 3H), 1.41-1.68 (m, 6H), 1.95-2.18 (m, 4H), 2.26-2.54 (m, 8H), 2.47-2.54 (m, 1H), 2.87-2.90 (m, 2H), 6.39 (d,  $J = 7.8$  Hz, 1H), 6.69 (d,  $J = 7.3$  Hz, 1H), 7.00-7.01 (m, 1H), 7.03-7.05 (m, 1H), 7.15 (s, 1H), 7.29 (d,  $J = 8.2$  Hz, 1H), 7.41 (s, 2H), 7.44 (d,  $J = 8.2$  Hz, 2H),

7.59 (d,  $J = 8.2$  Hz, 2H).

$^{13}\text{C}$  NMR ( $\text{CDCl}_3$ , 101 MHz)  $\delta$ : 13.77, 21.20, 21.51, 25.61, 26.33, 29.39, 31.48, 35.78, 37.96, 44.28, 47.89, 50.39, 56.96, 124.05 (q,  $J = 271.9$  Hz), 124.74, 124.94, 125.03, 125.56 (q,  $J = 4.2$  Hz), 126.01, 127.48, 128.34, 128.43, 129.48 (q,  $J = 32.5$  Hz), 133.44, 133.76, 137.26, 138.14, 138.37, 139.65, 145.53, 166.87, 220.77.

$^{19}\text{F}$  NMR ( $\text{CDCl}_3$ , 376 MHz)  $\delta$ : -63.71.

IR (KBr): 3311 m, 2929 m, 2863 m, 1737 s, 1639 s, 1603 s, 1522 s, 1472 m, 1455 m, 1411w, 1324 s, 1240 m, 1163 s, 1123 s, 1068 s, 1017 m, 862 m, 822 m, 757 s.

HRMS (DART+,  $[\text{M}+\text{H}]^+$ ) Calcd for  $\text{C}_{35}\text{H}_{37}\text{F}_3\text{NO}_2$ : 560.2771. Found: 560.2762.

#### XIV. References

- [1] J. E. Rowe, *Synthesis*, 1980, 114.
- [2] P. W. Groundwater, I. Garnett, A. J. Morton, T. Sharif, S. J. Coles, M. B. Hursthouse, M. Nyerges, R. J. Anderson, D. Bendell, A. McKillop, W. Zhanga, *J. Chem. Soc., Perkin Trans. 1*, 2001, 2781.
- [3] S. J. Barraza, S. E. Denmark. *Synlett*, 2017, **28**, 2891.

#### XV. Copies of NMR spectra

<sup>1</sup>H NMR (400 MHz, CDCl<sub>3</sub>)

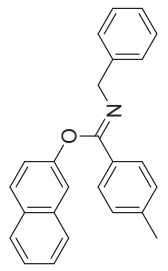

1aaa (E:Z = 1:17)

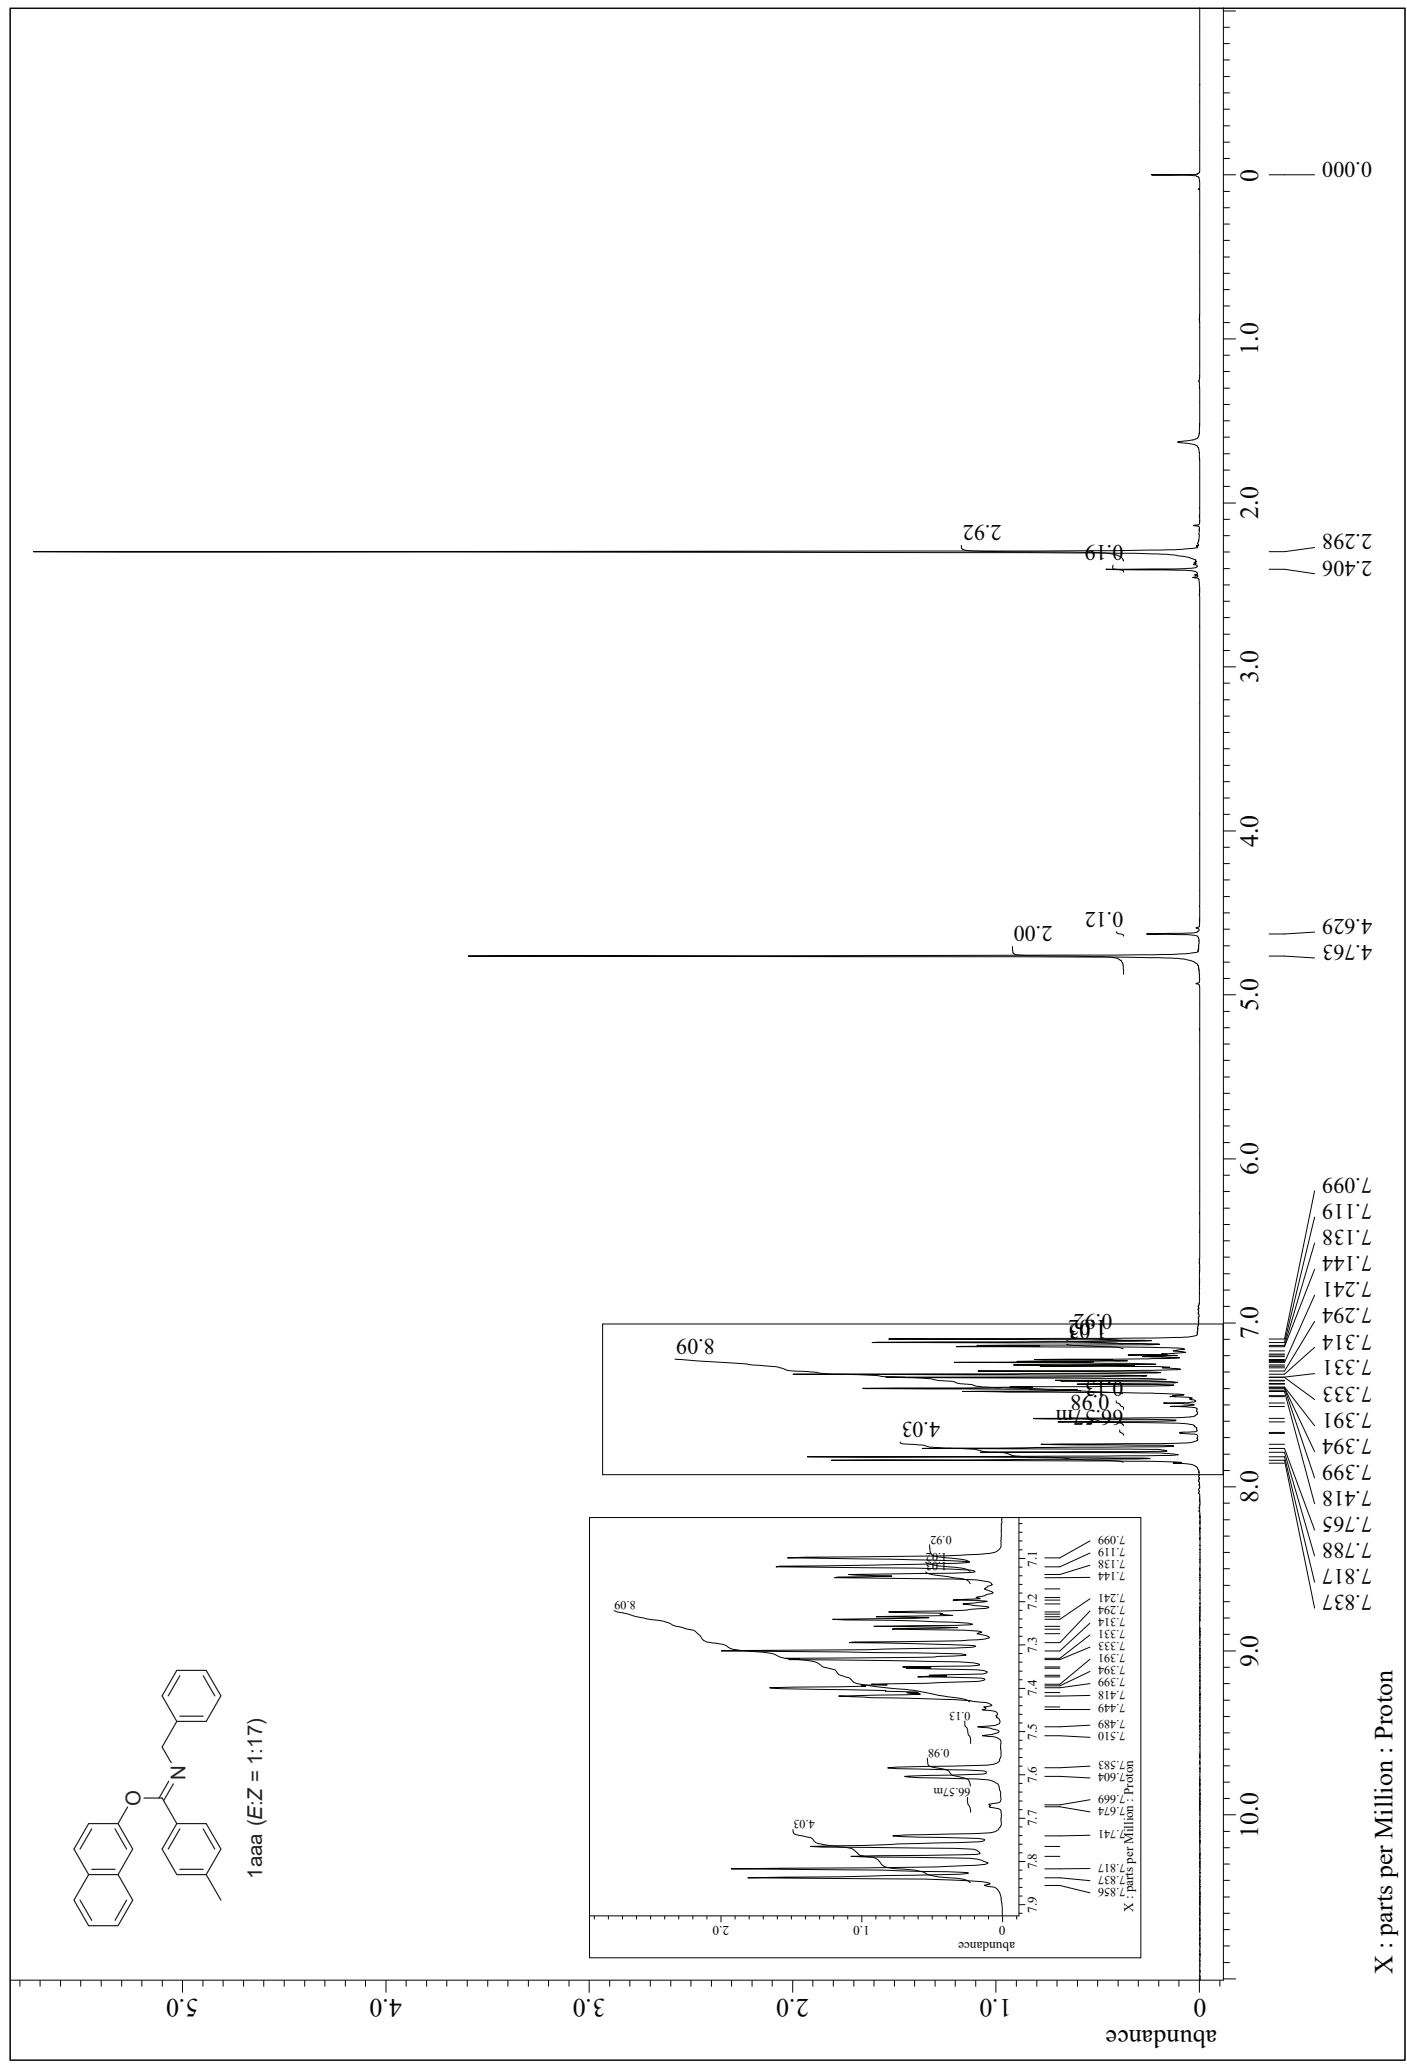

X : parts per Million : Proton

<sup>13</sup>C NMR (101 MHz, CDCl<sub>3</sub>)

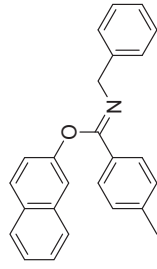

1aaa (E:Z = 1:17)

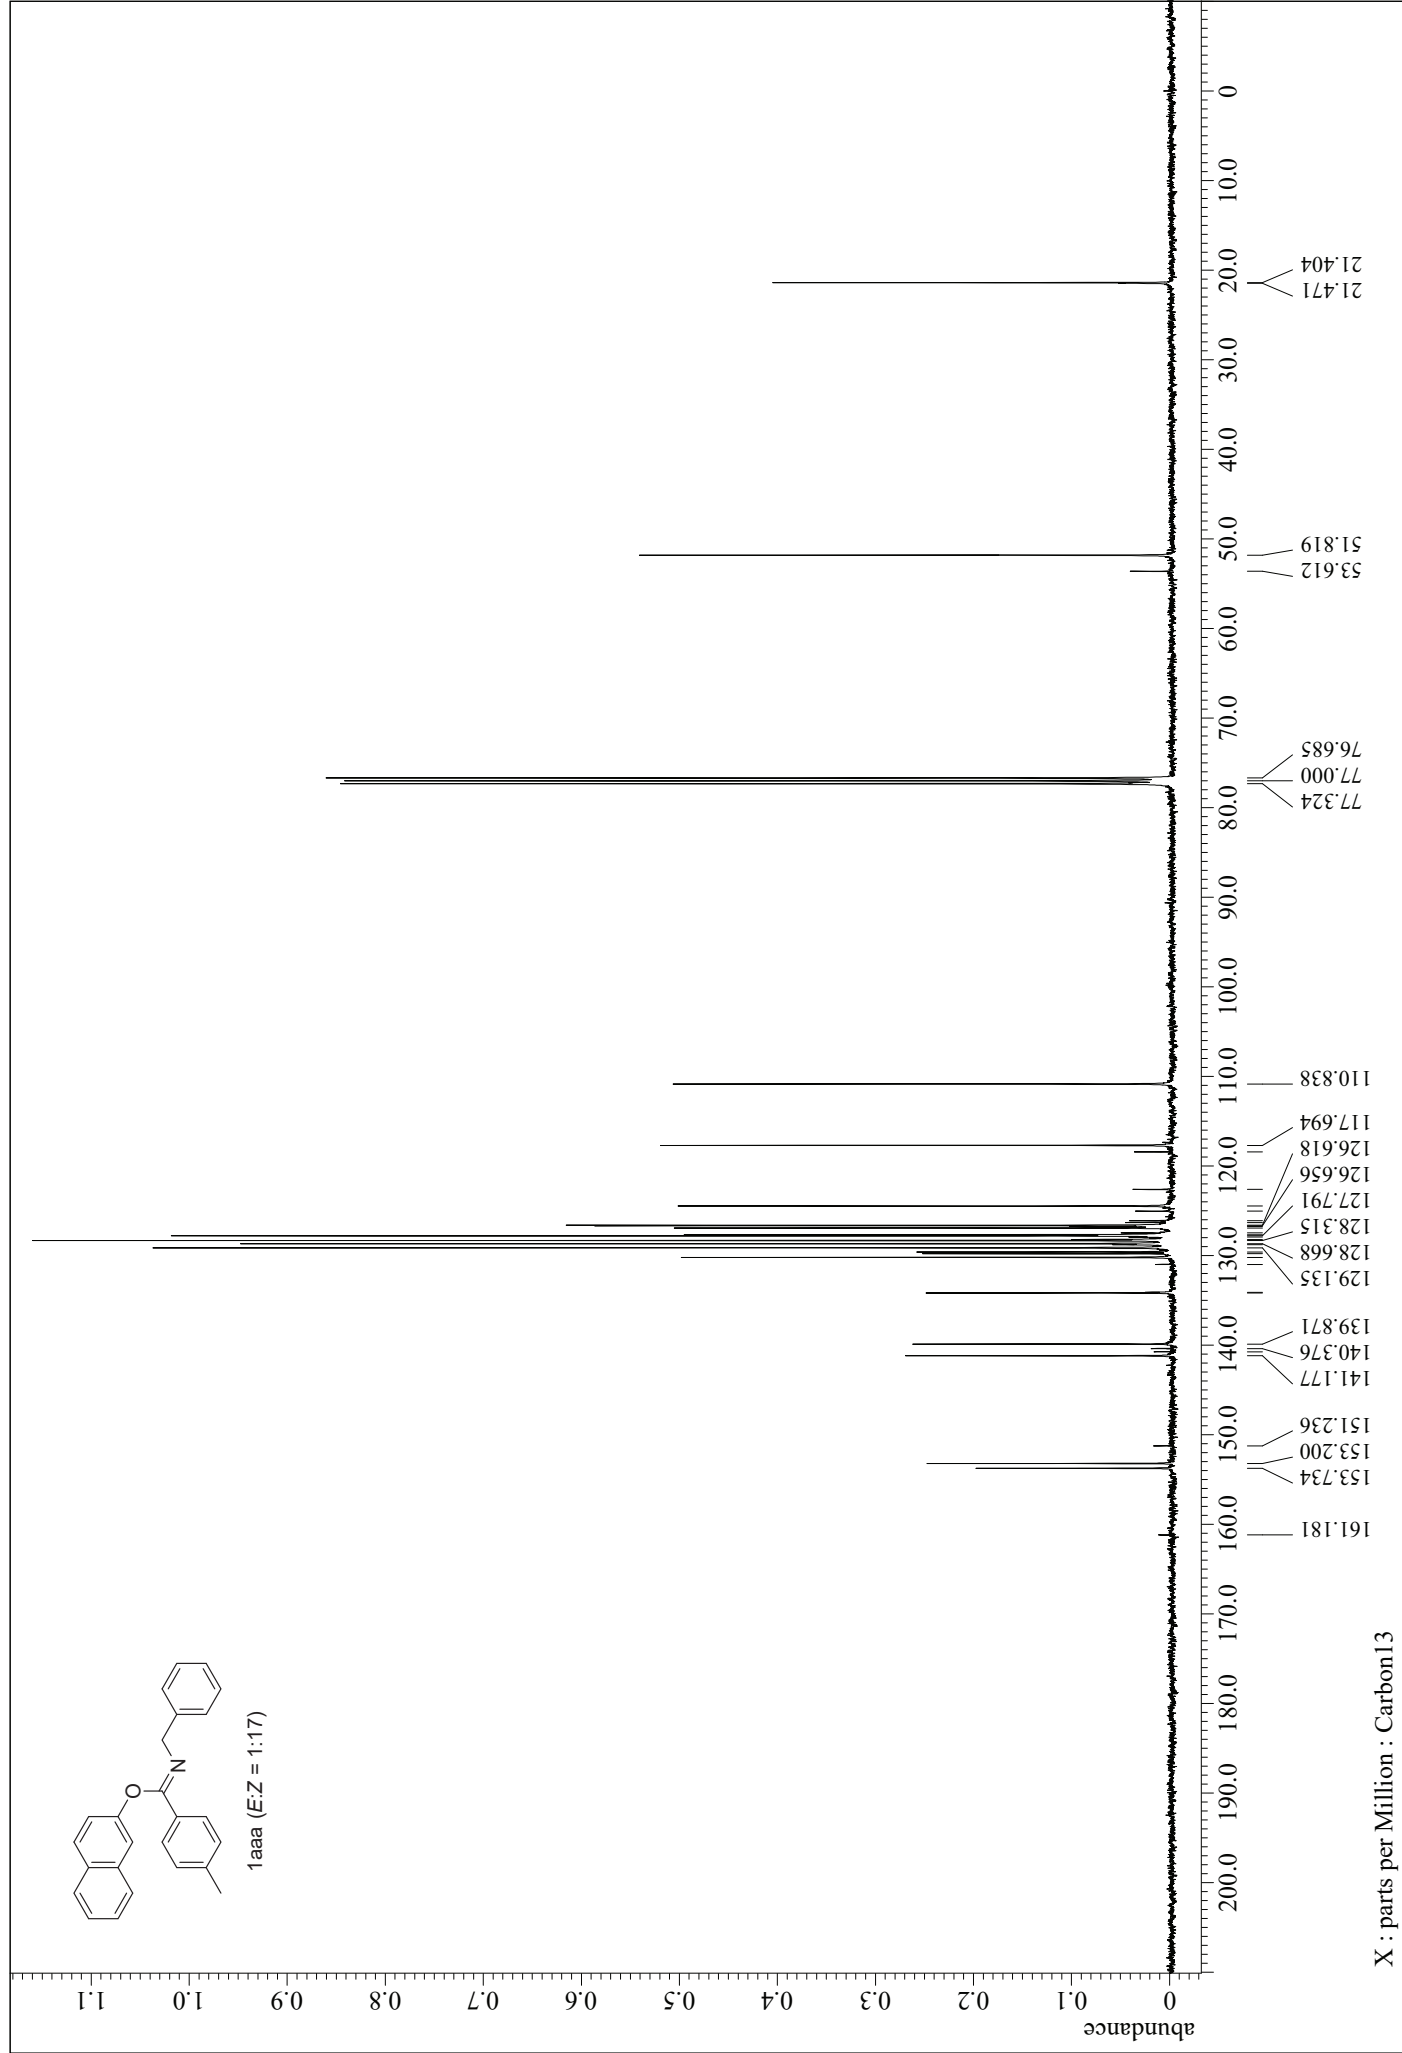

X : parts per Million : Carbon13

<sup>1</sup>H NMR (400 MHz, CDCl<sub>3</sub>)

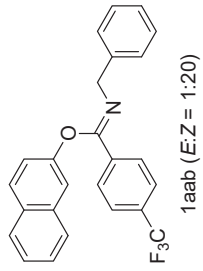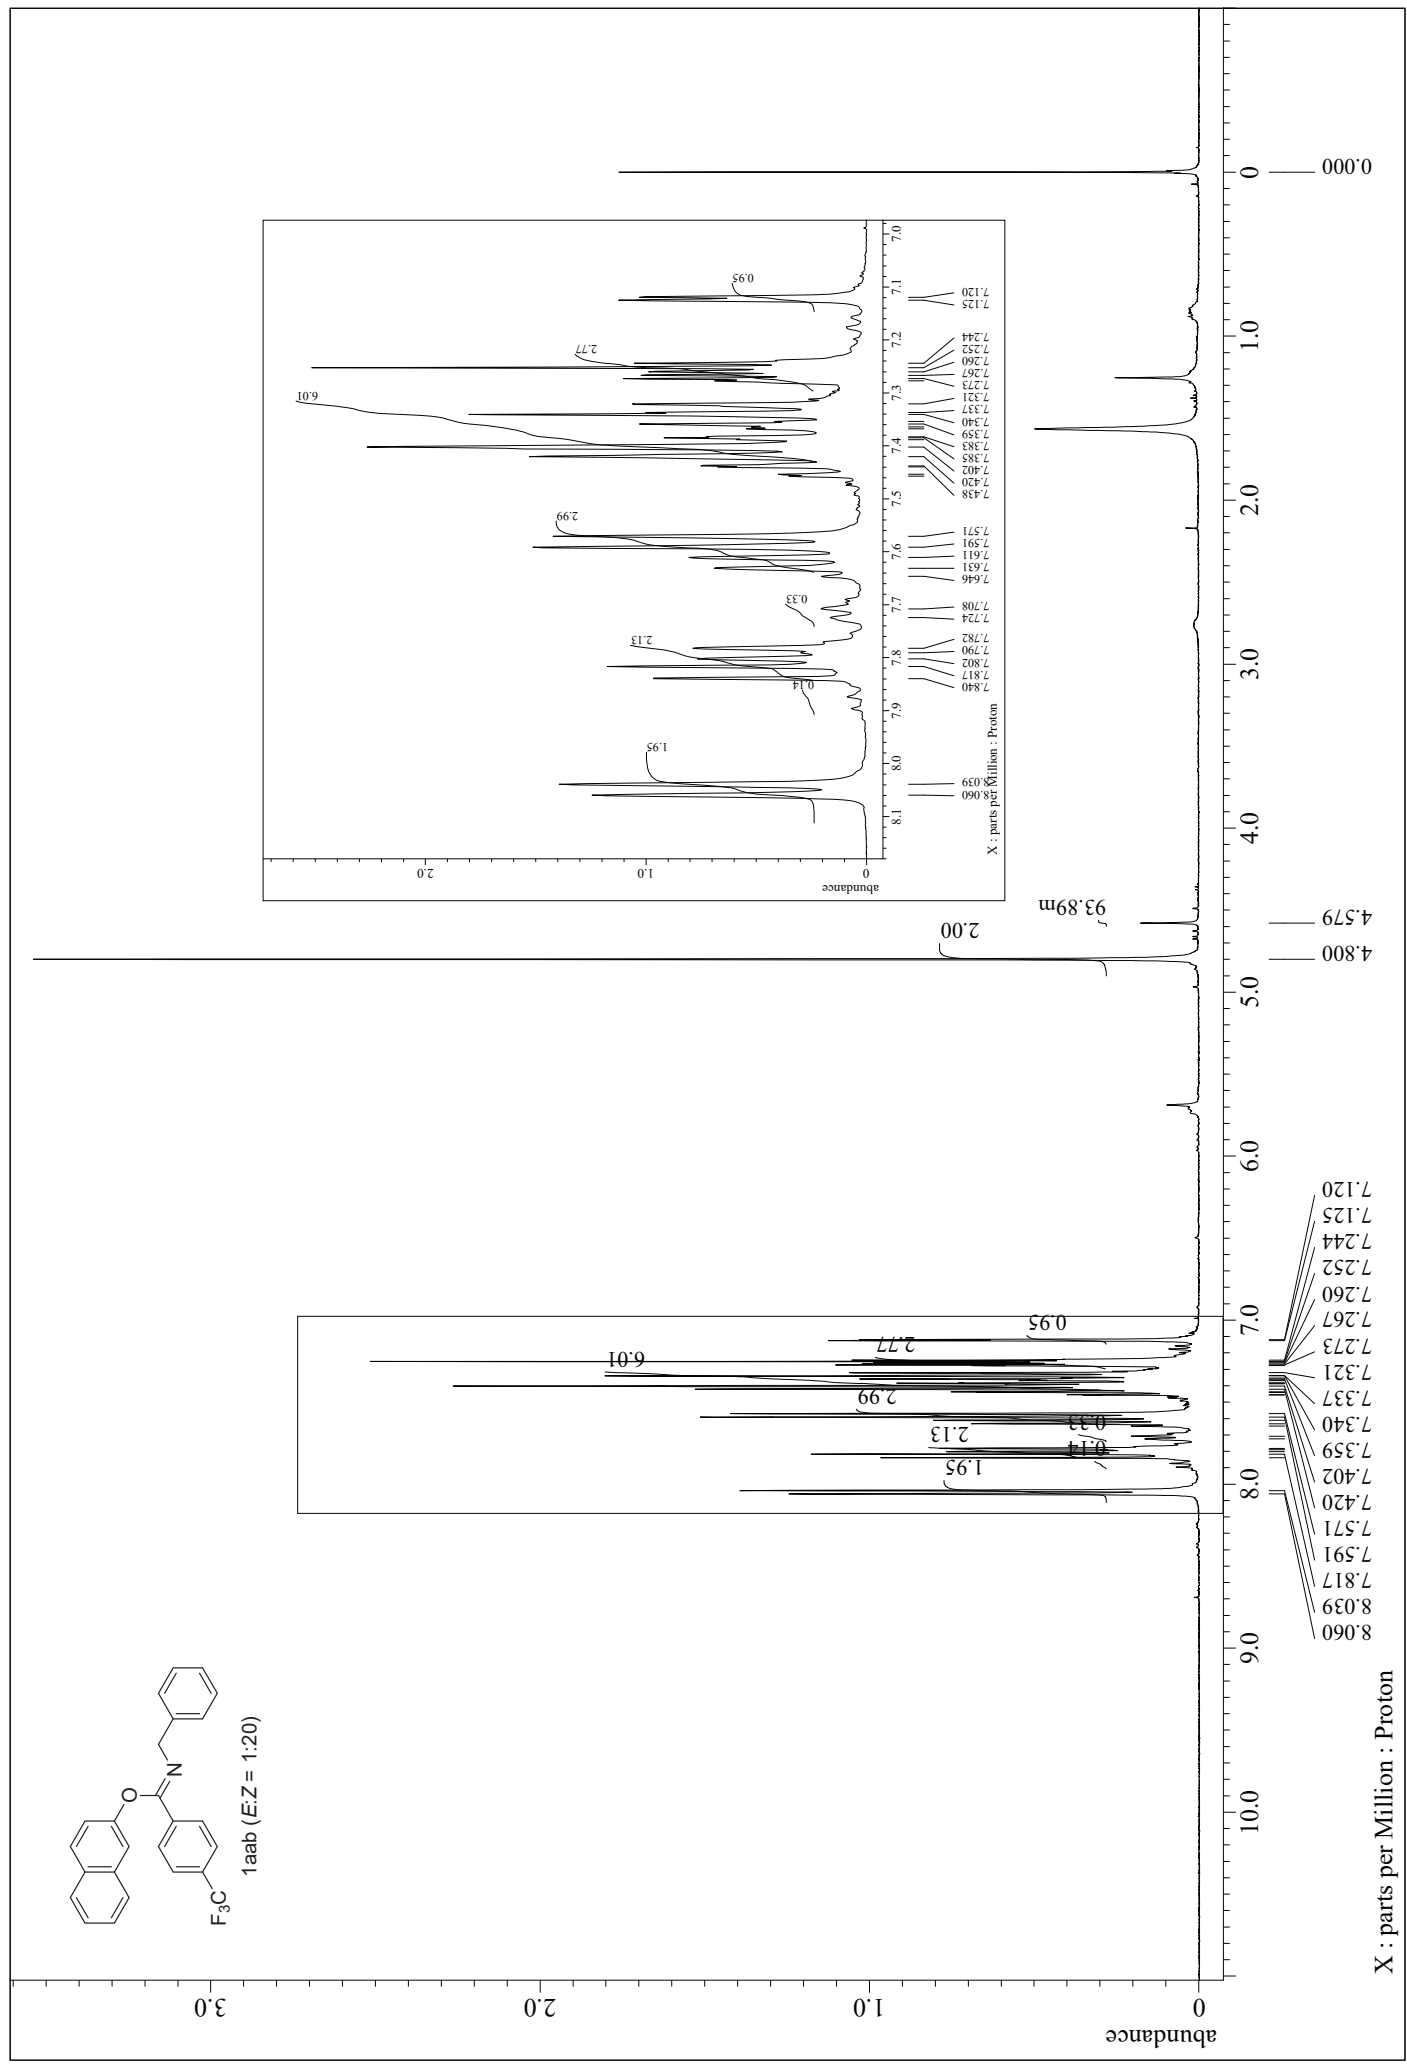

X : parts per Million : Proton

<sup>13</sup>C NMR (101 MHz, CDCl<sub>3</sub>)

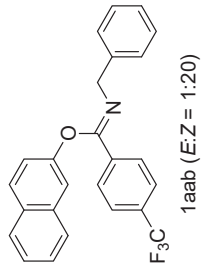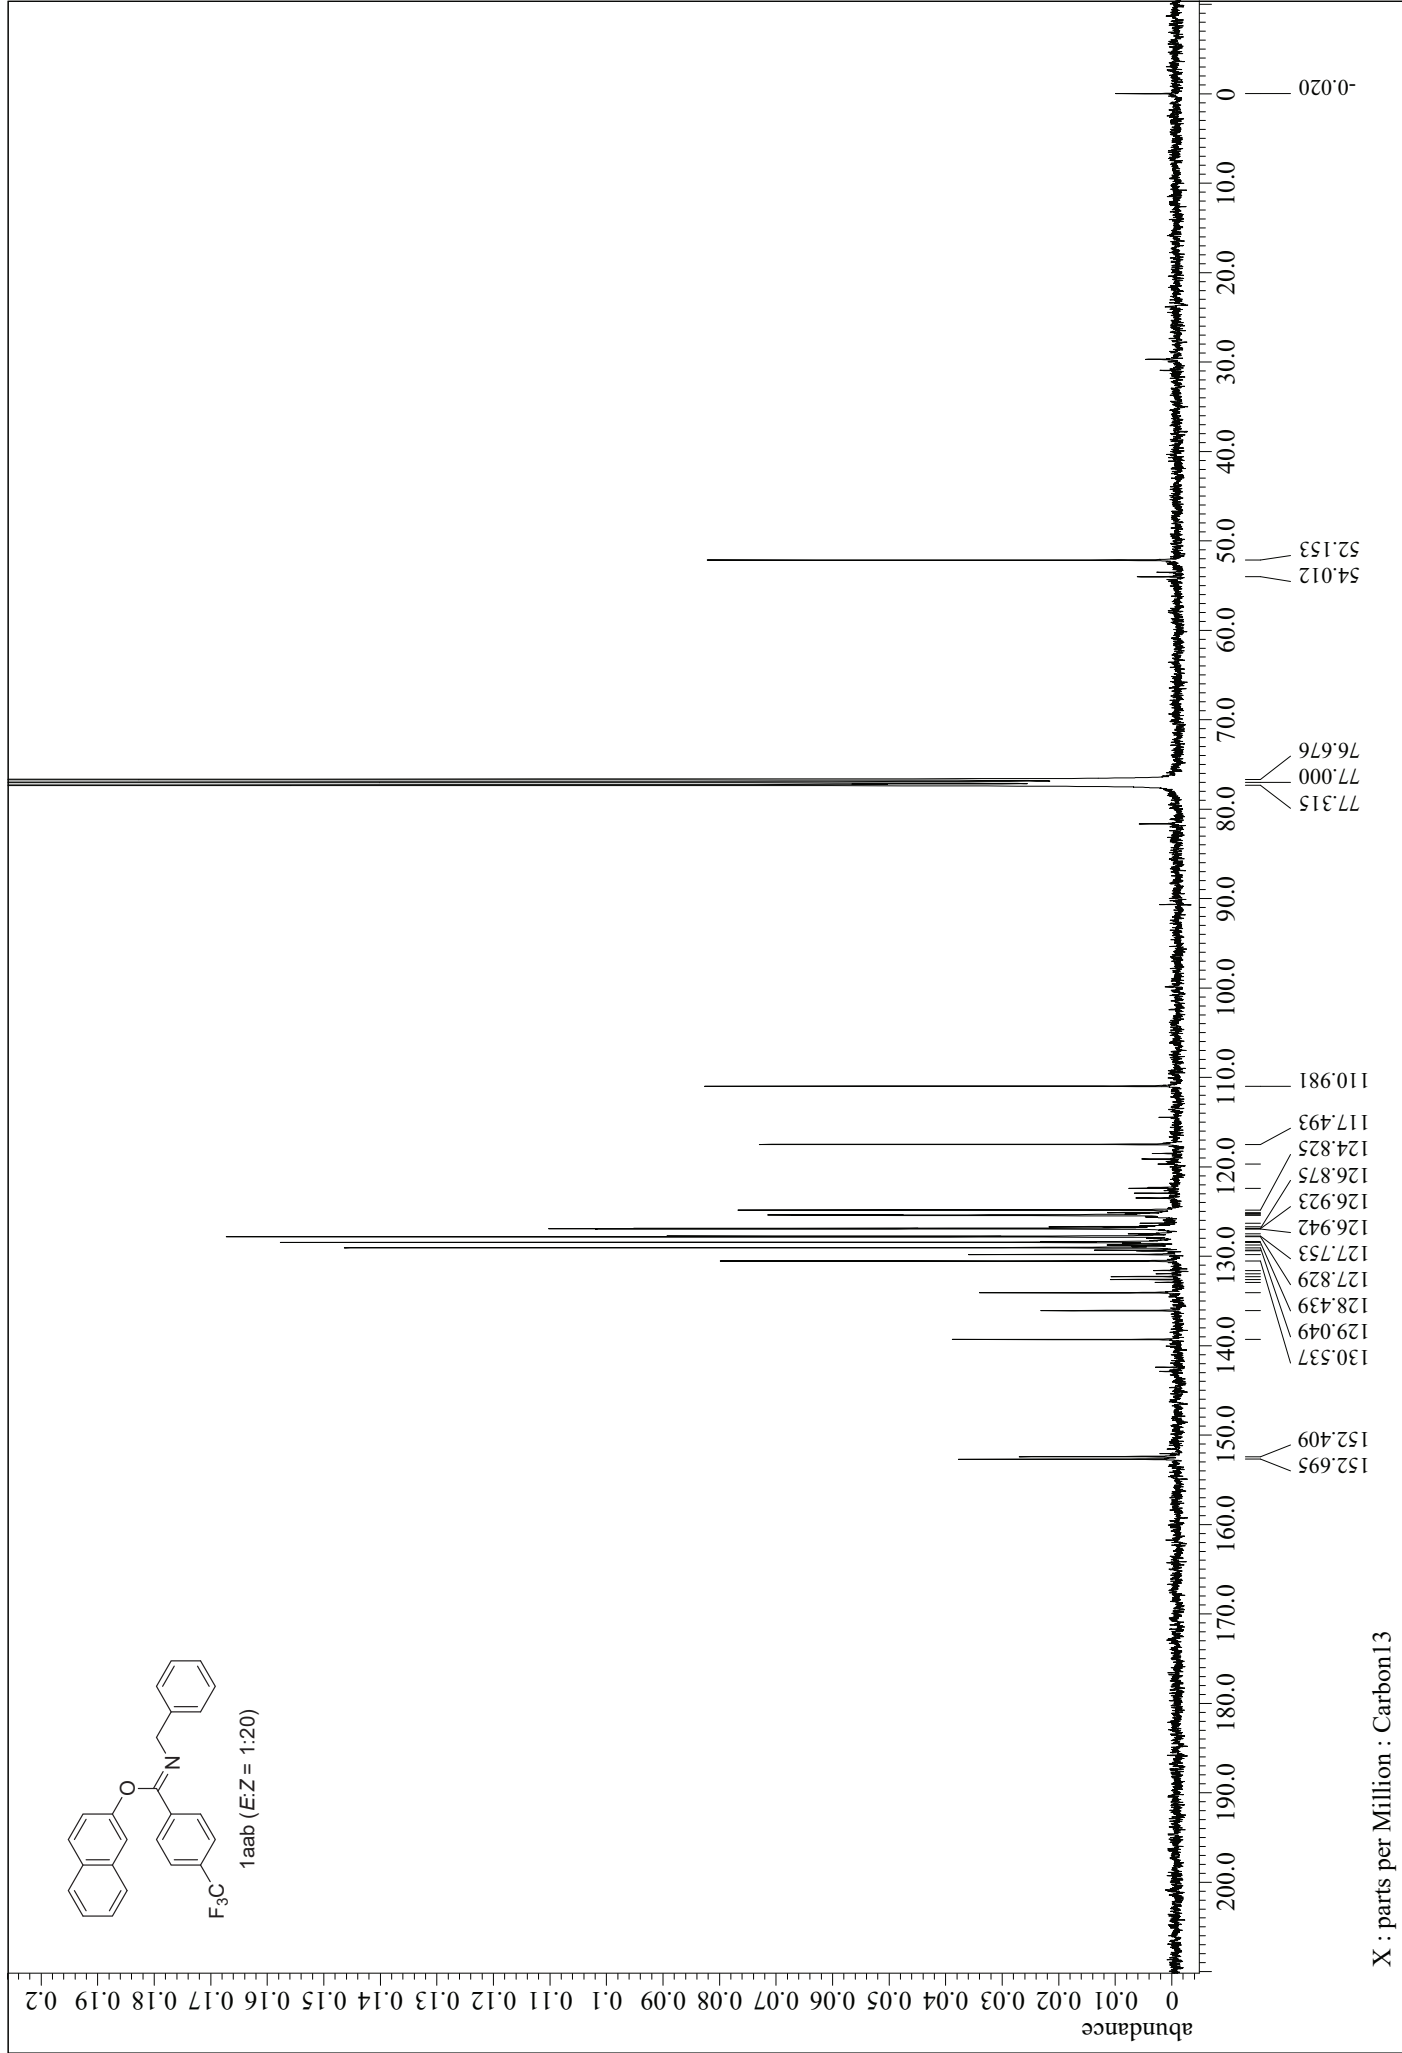



$^{19}\text{F}$  NMR (376 MHz,  $\text{CDCl}_3$ )

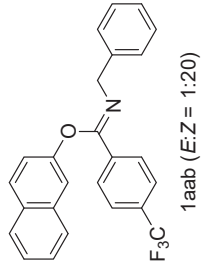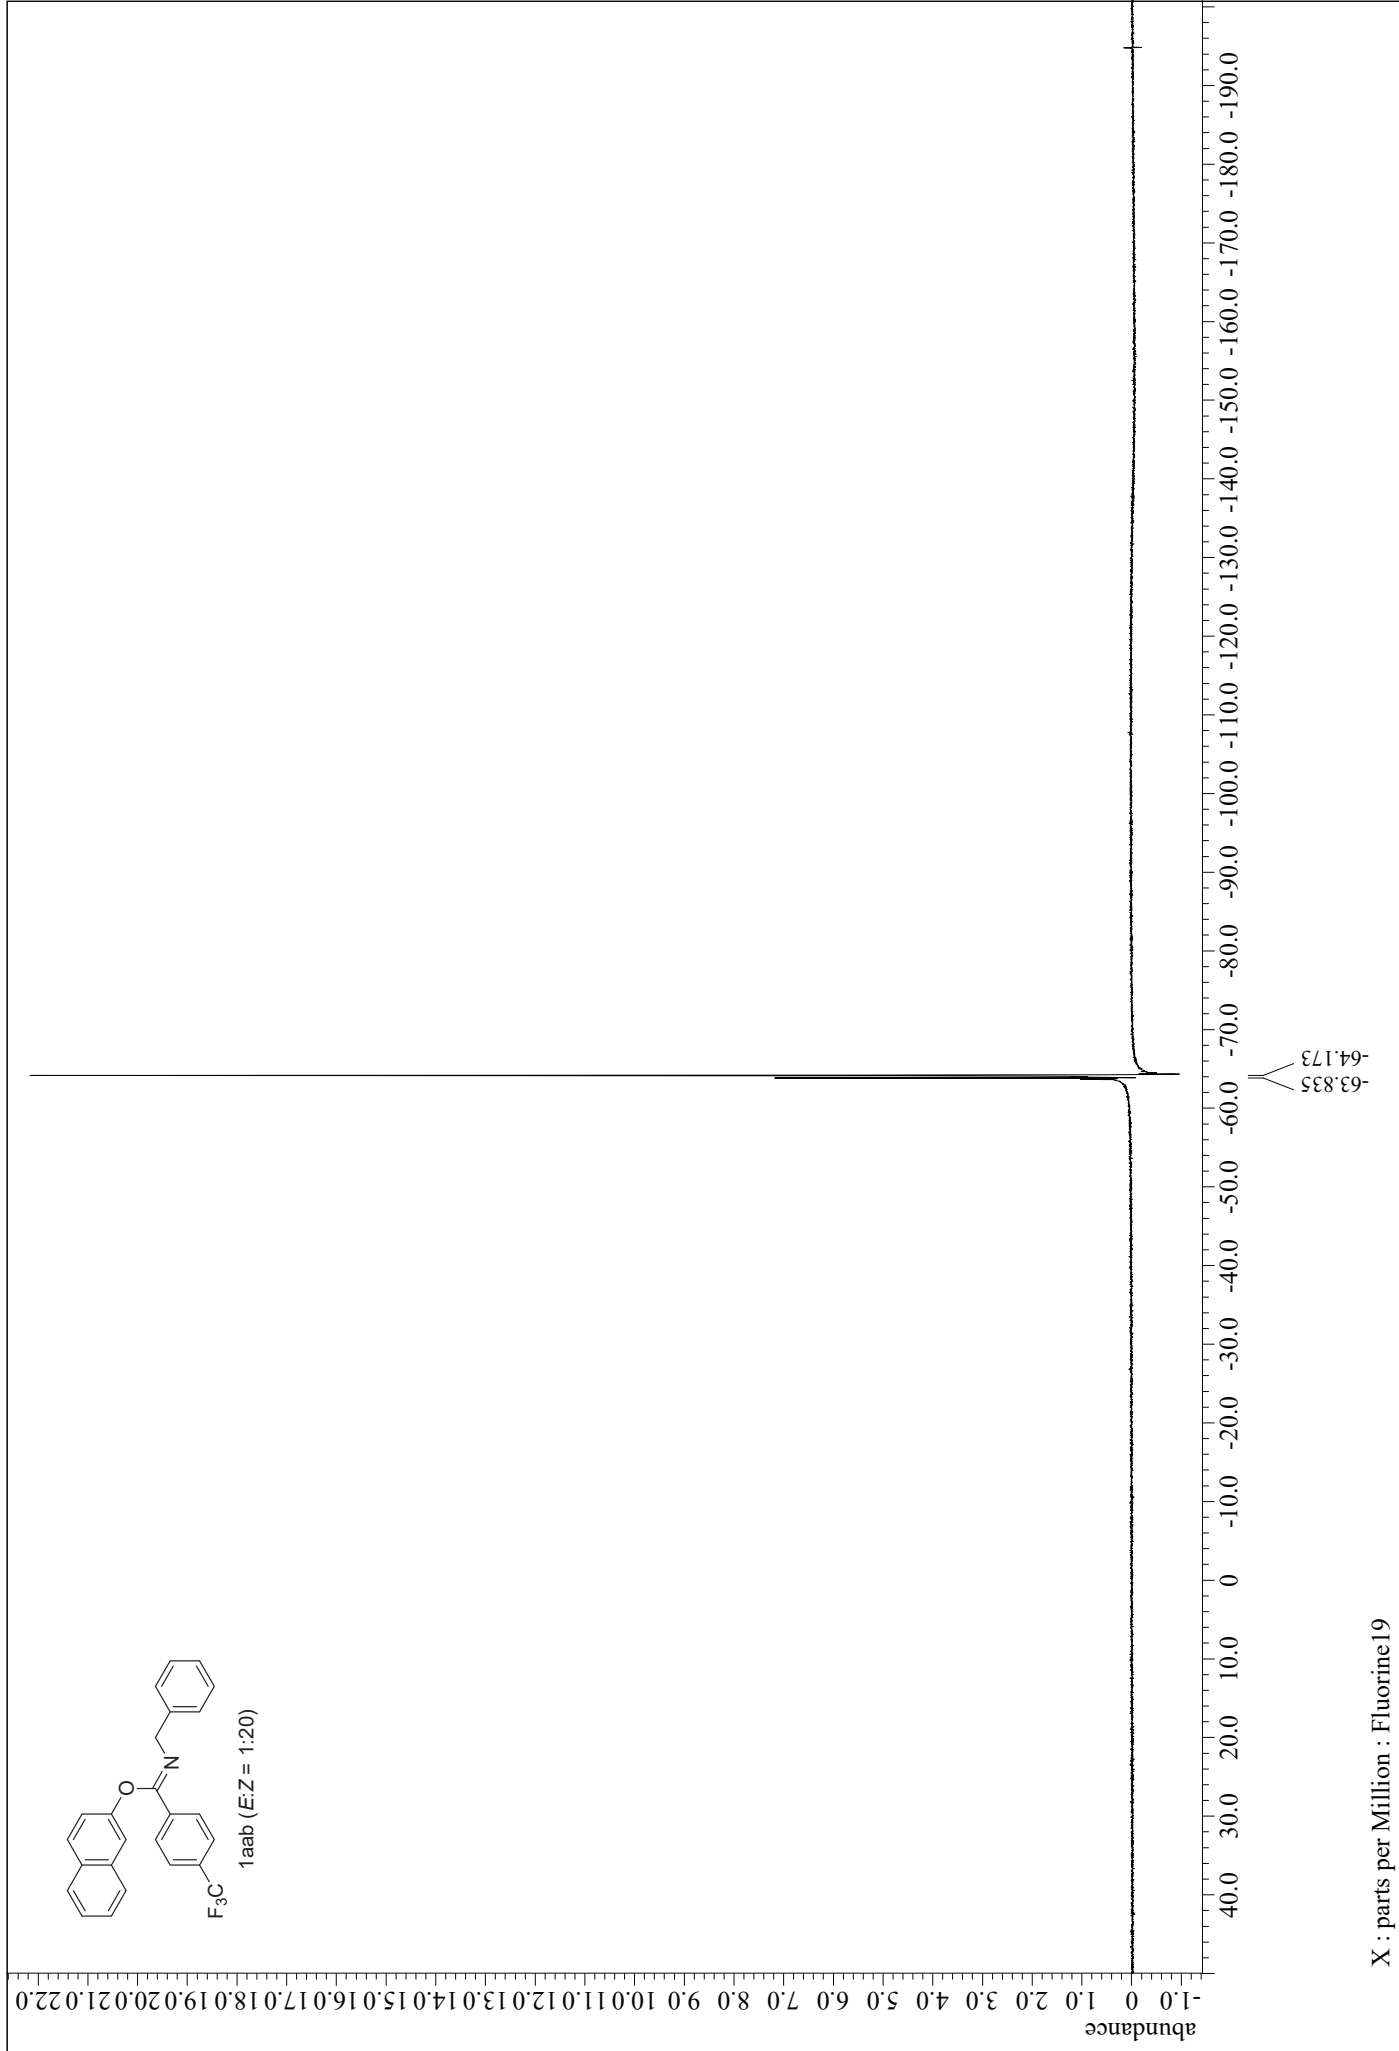



<sup>13</sup>C NMR (101 MHz, CDCl<sub>3</sub>)

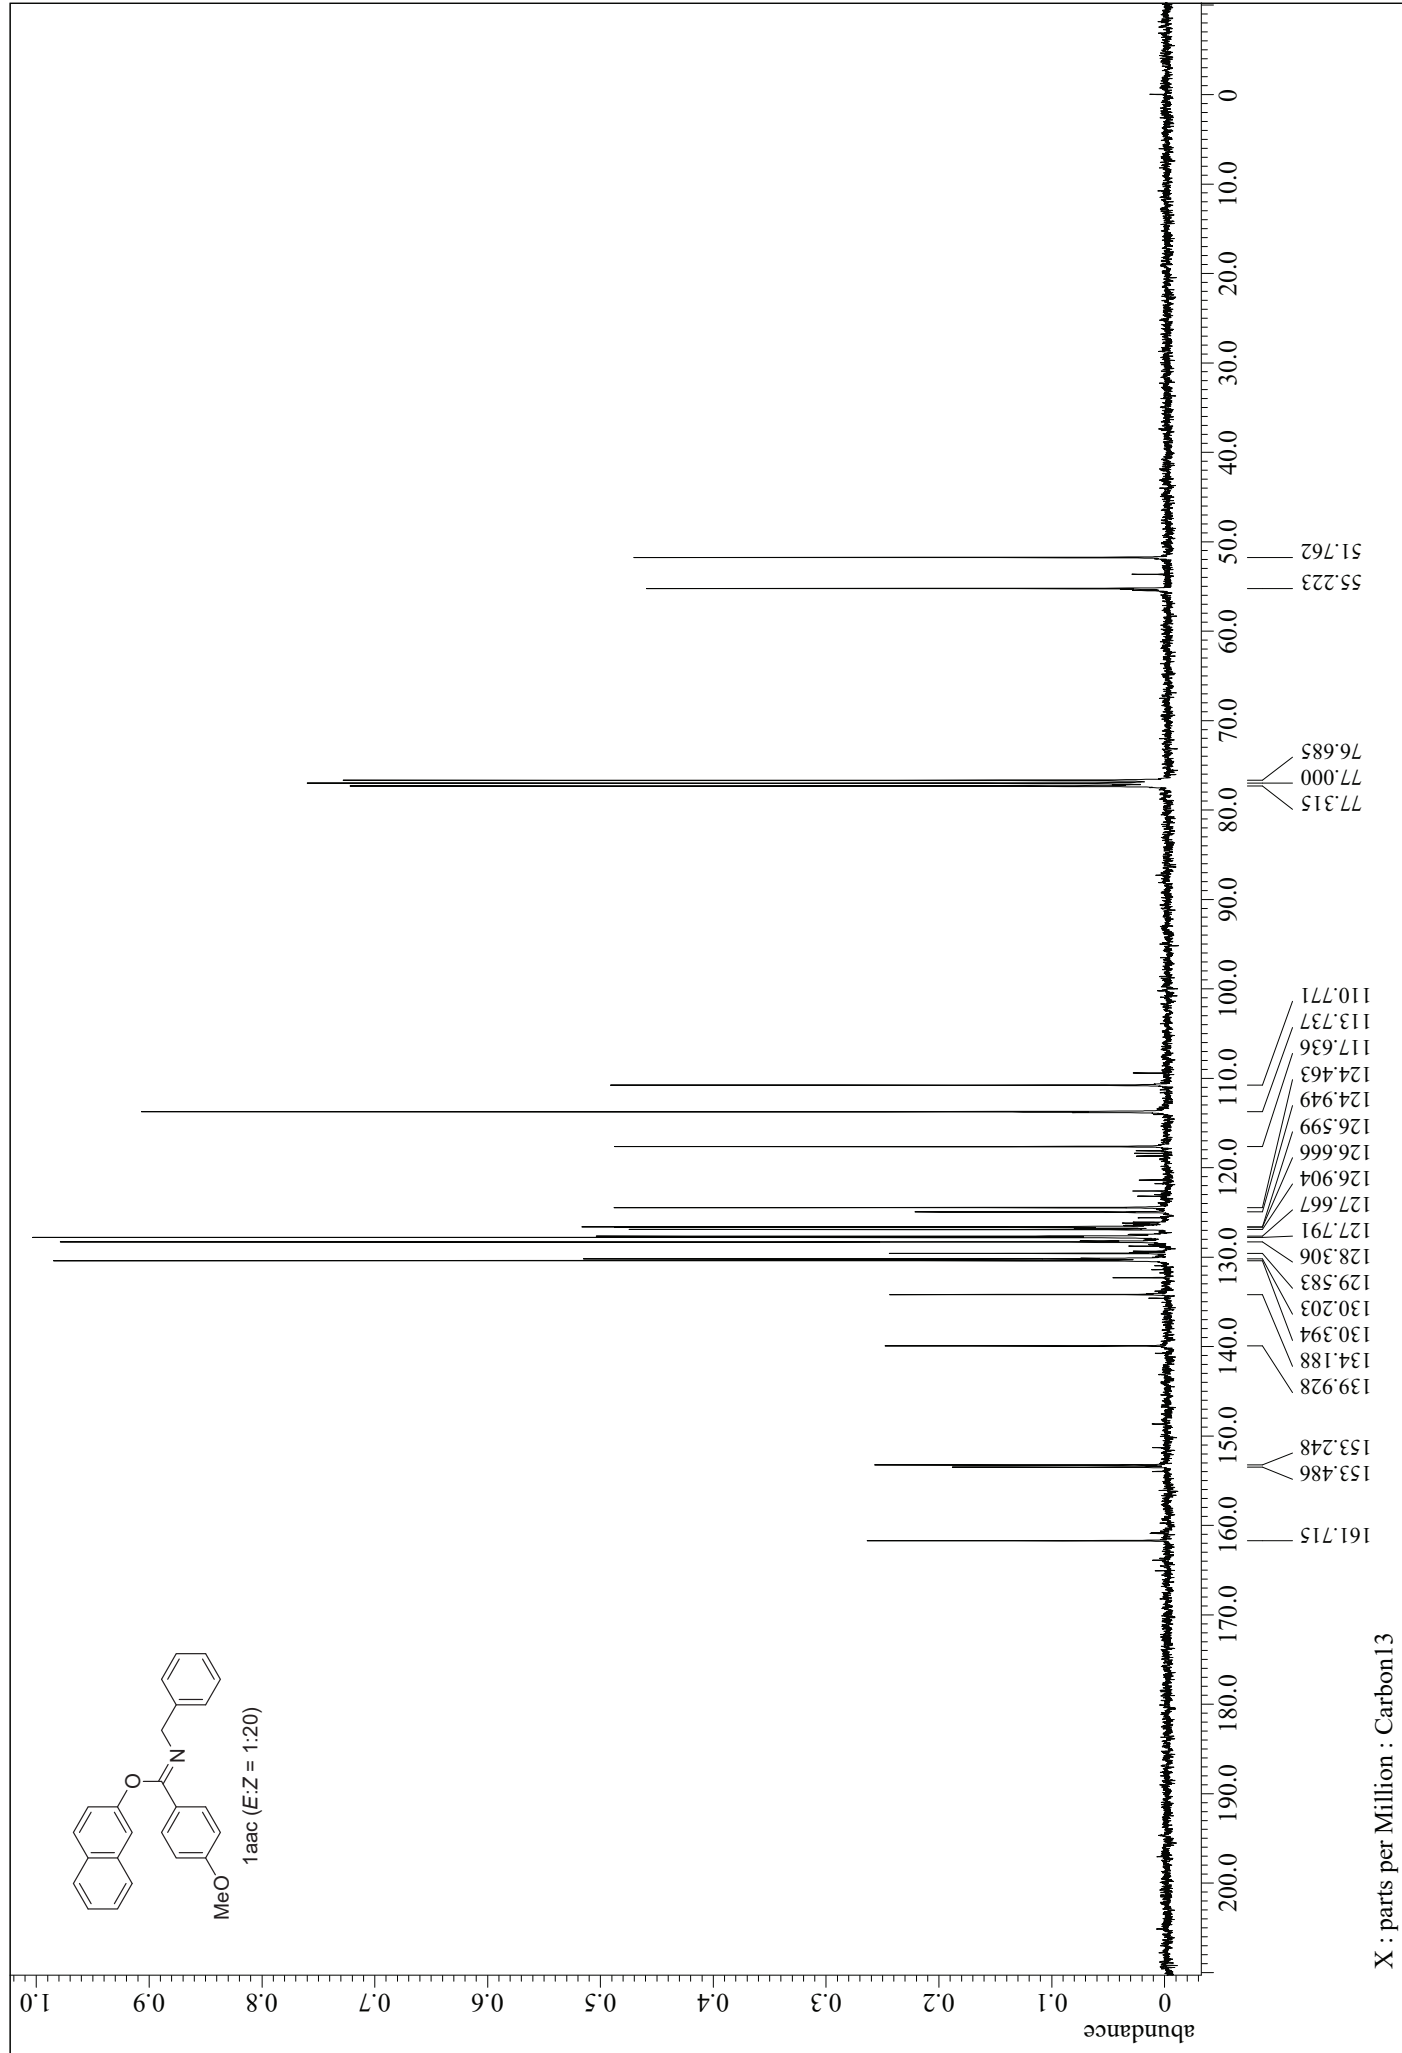

X : parts per Million : Carbon13

<sup>1</sup>H NMR (400 MHz, CDCl<sub>3</sub>)

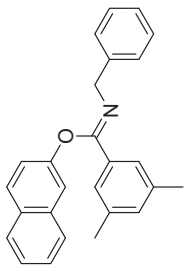

1aad (E:Z = 1:13)

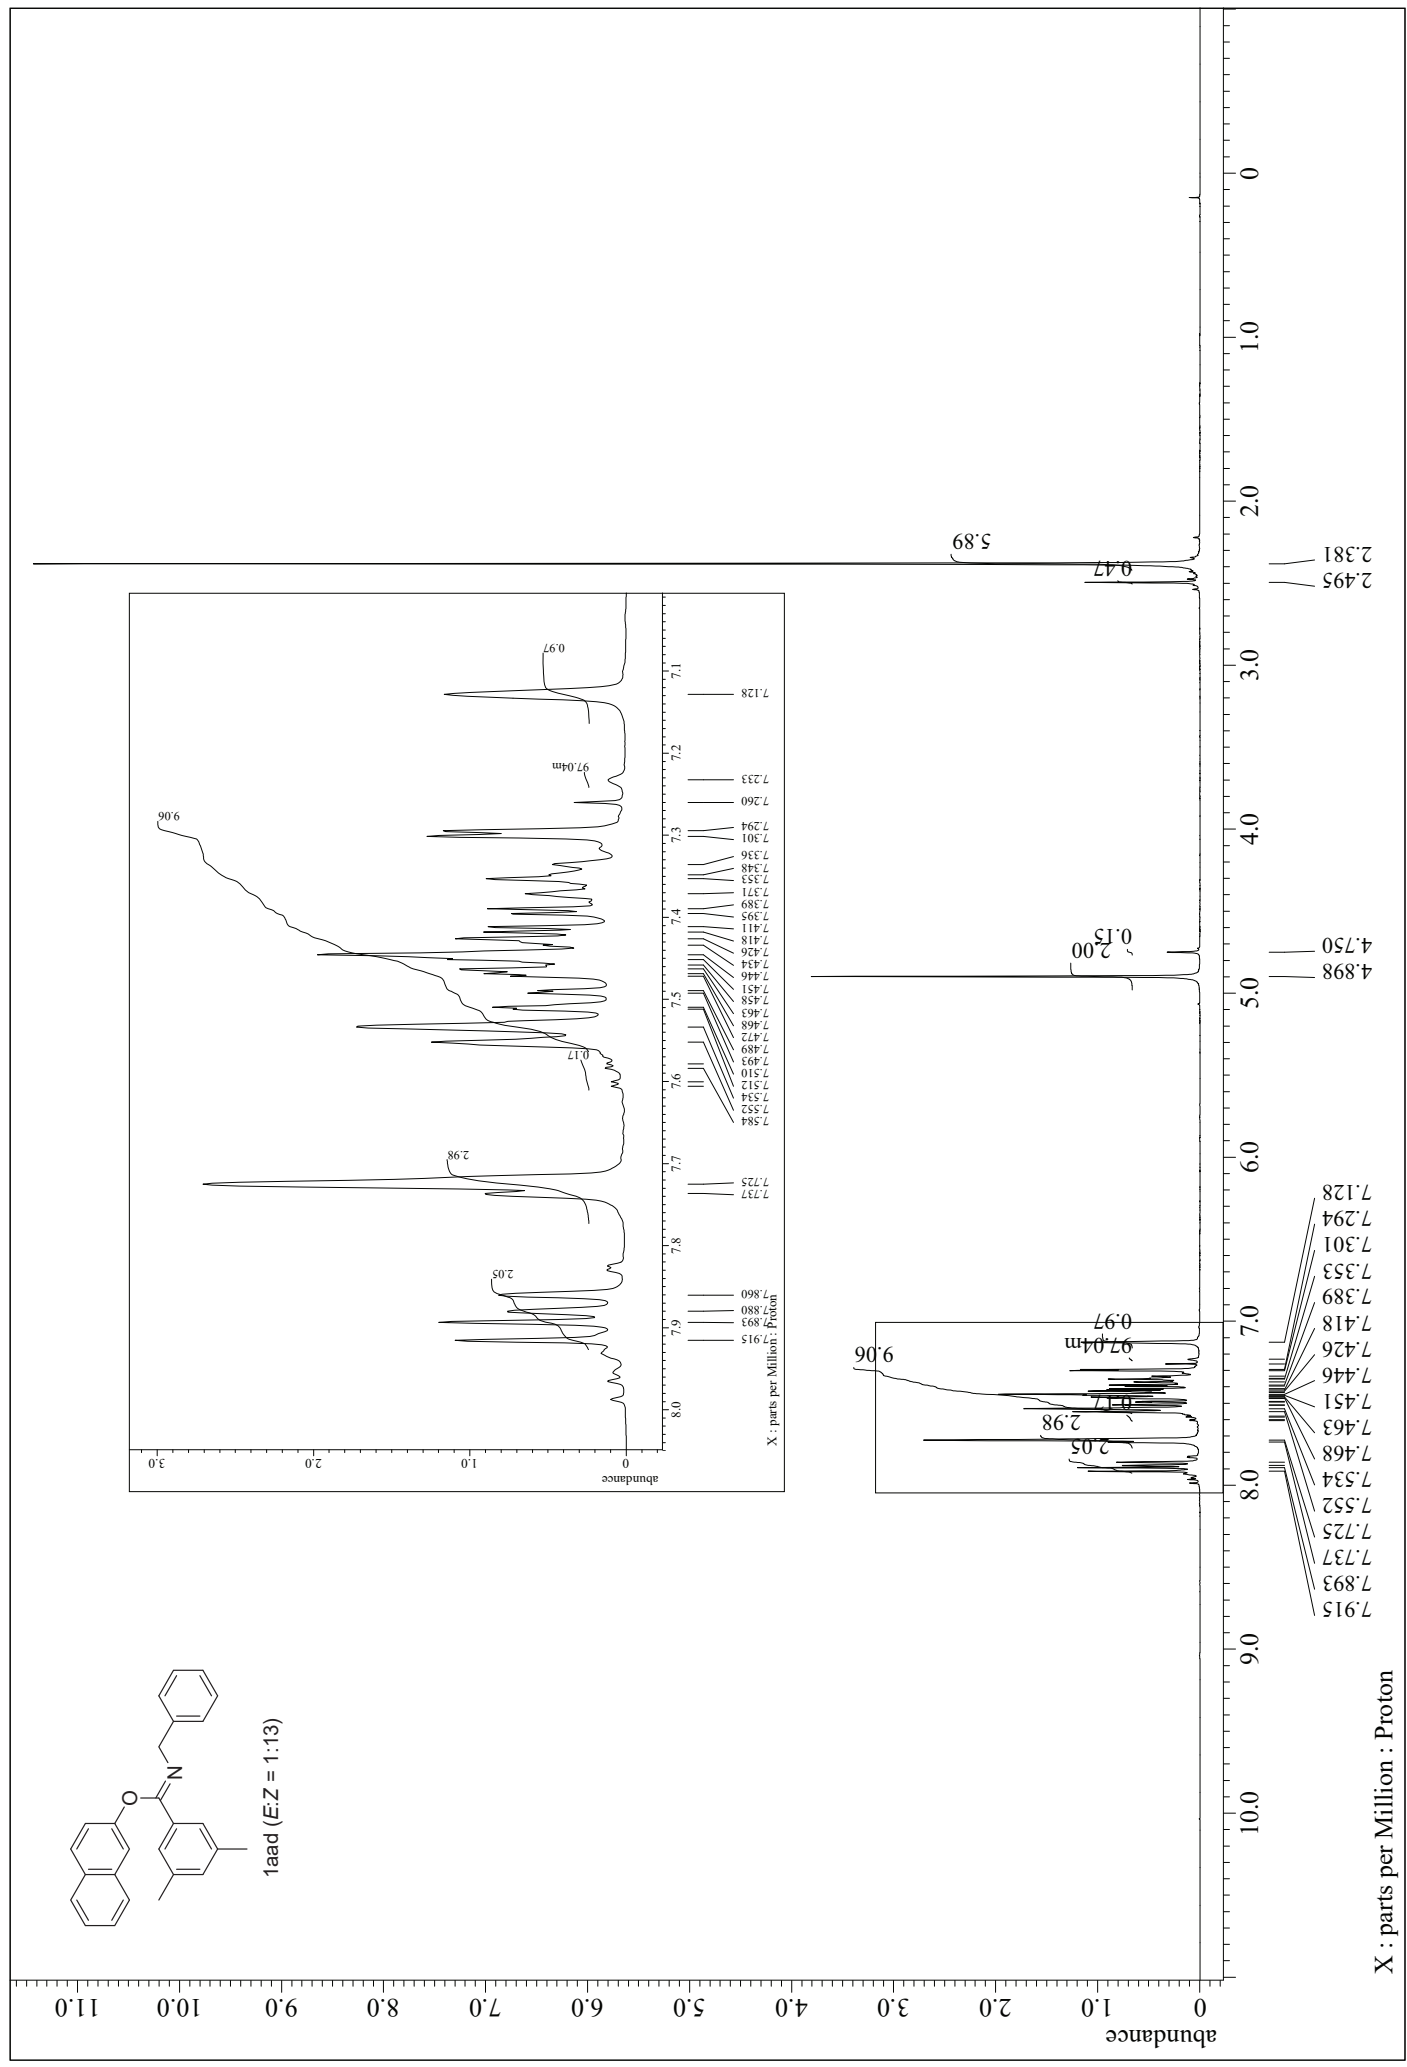

X : parts per Million : Proton

<sup>13</sup>C NMR (101 MHz, CDCl<sub>3</sub>)

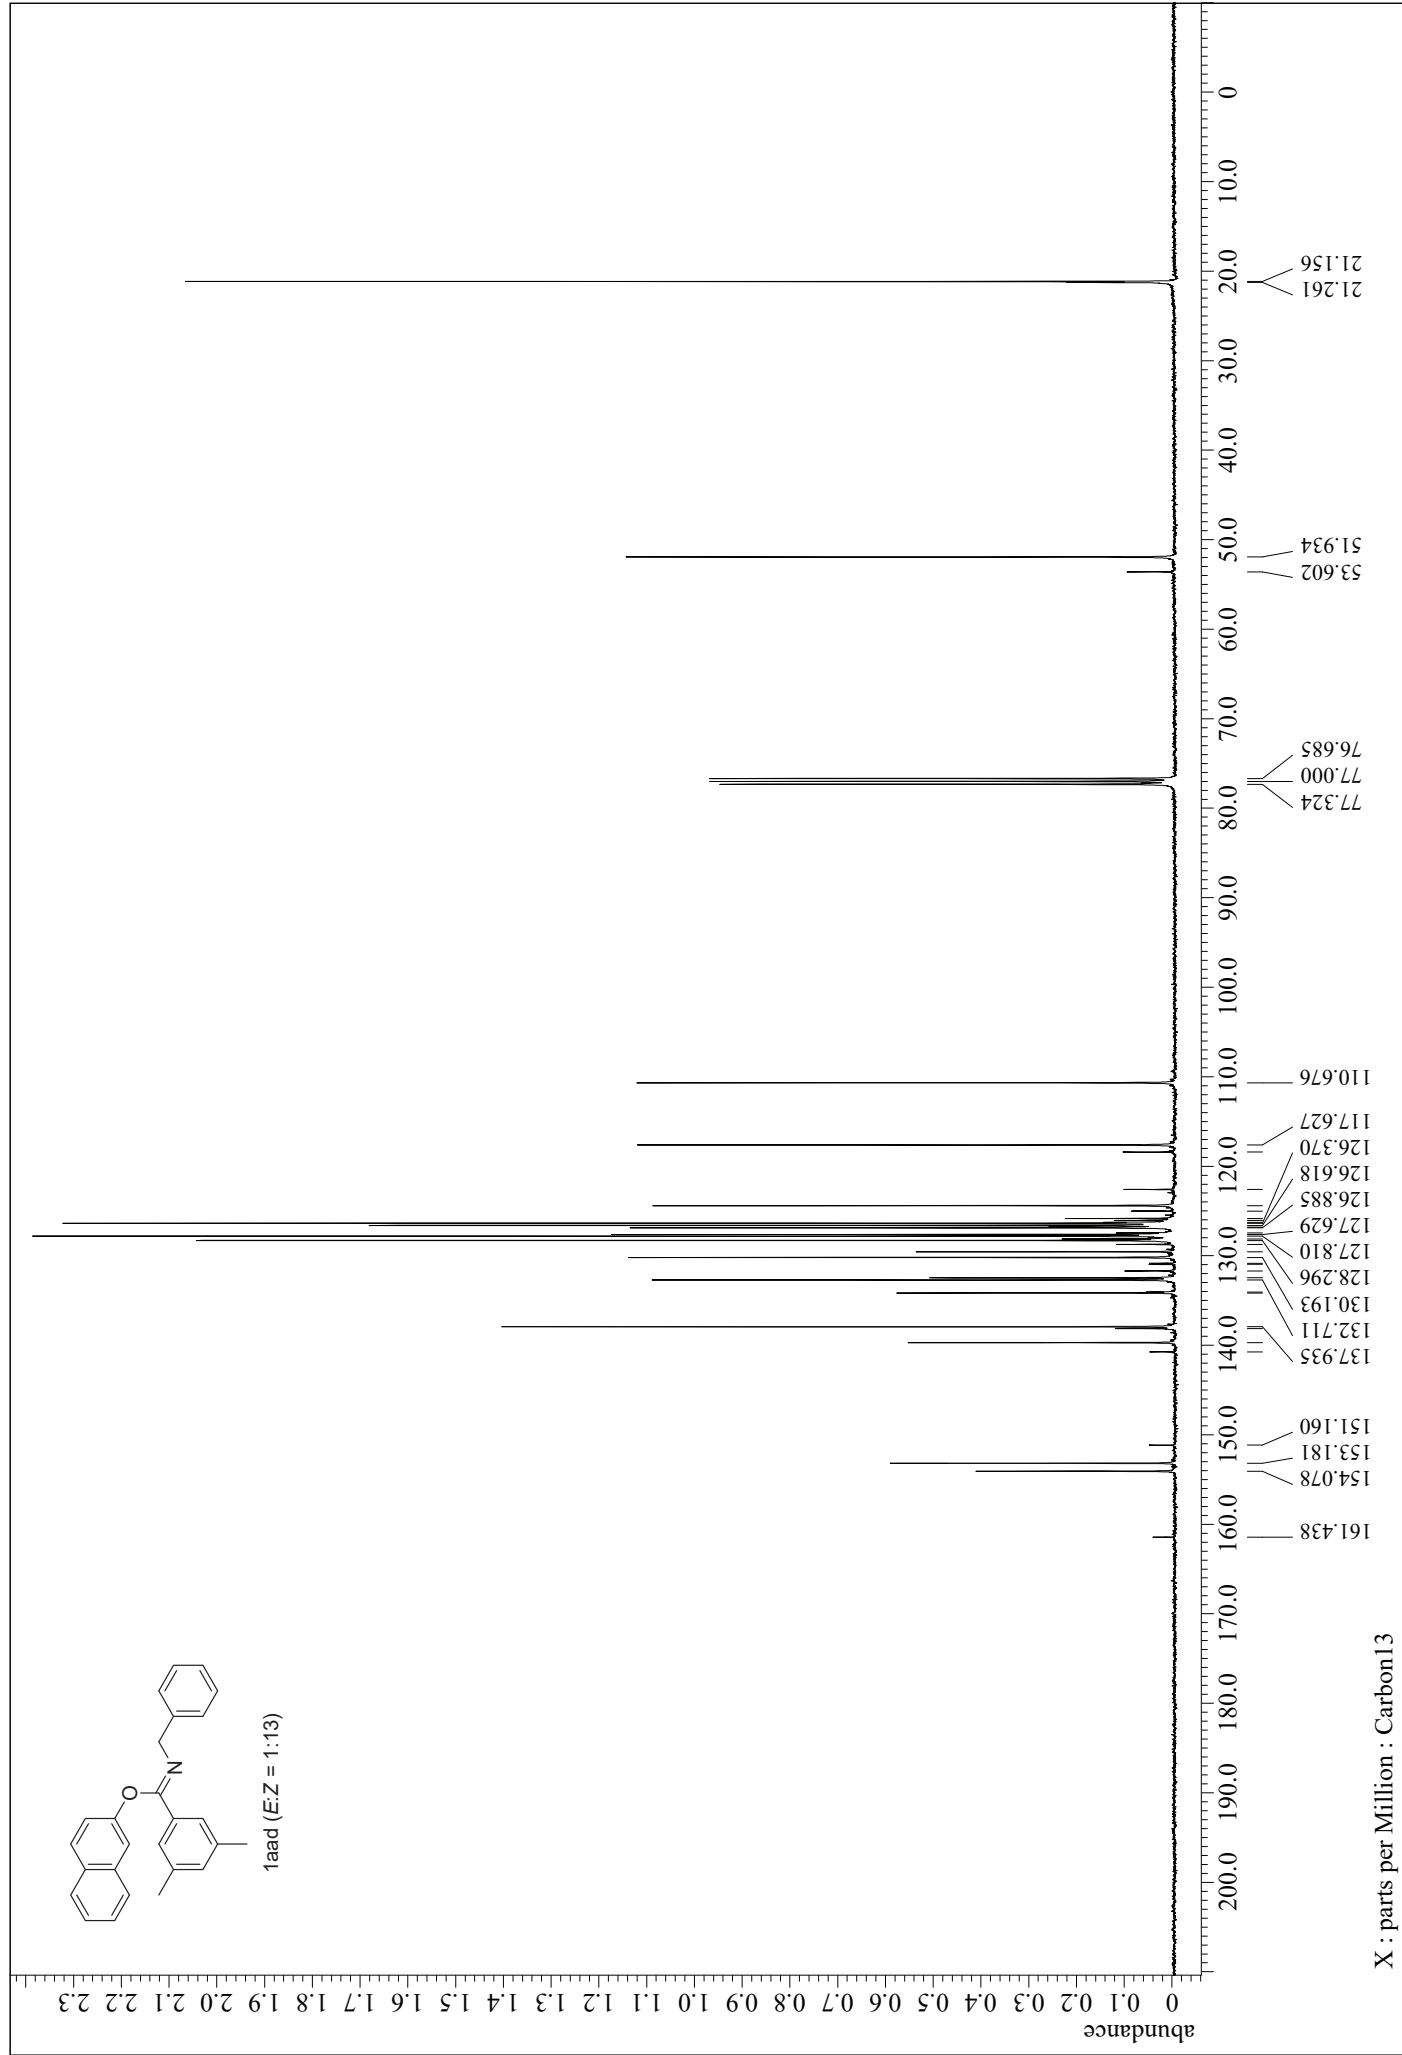

X : parts per Million : Carbon13

<sup>1</sup>H NMR (400 MHz, CDCl<sub>3</sub>)

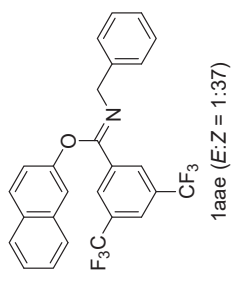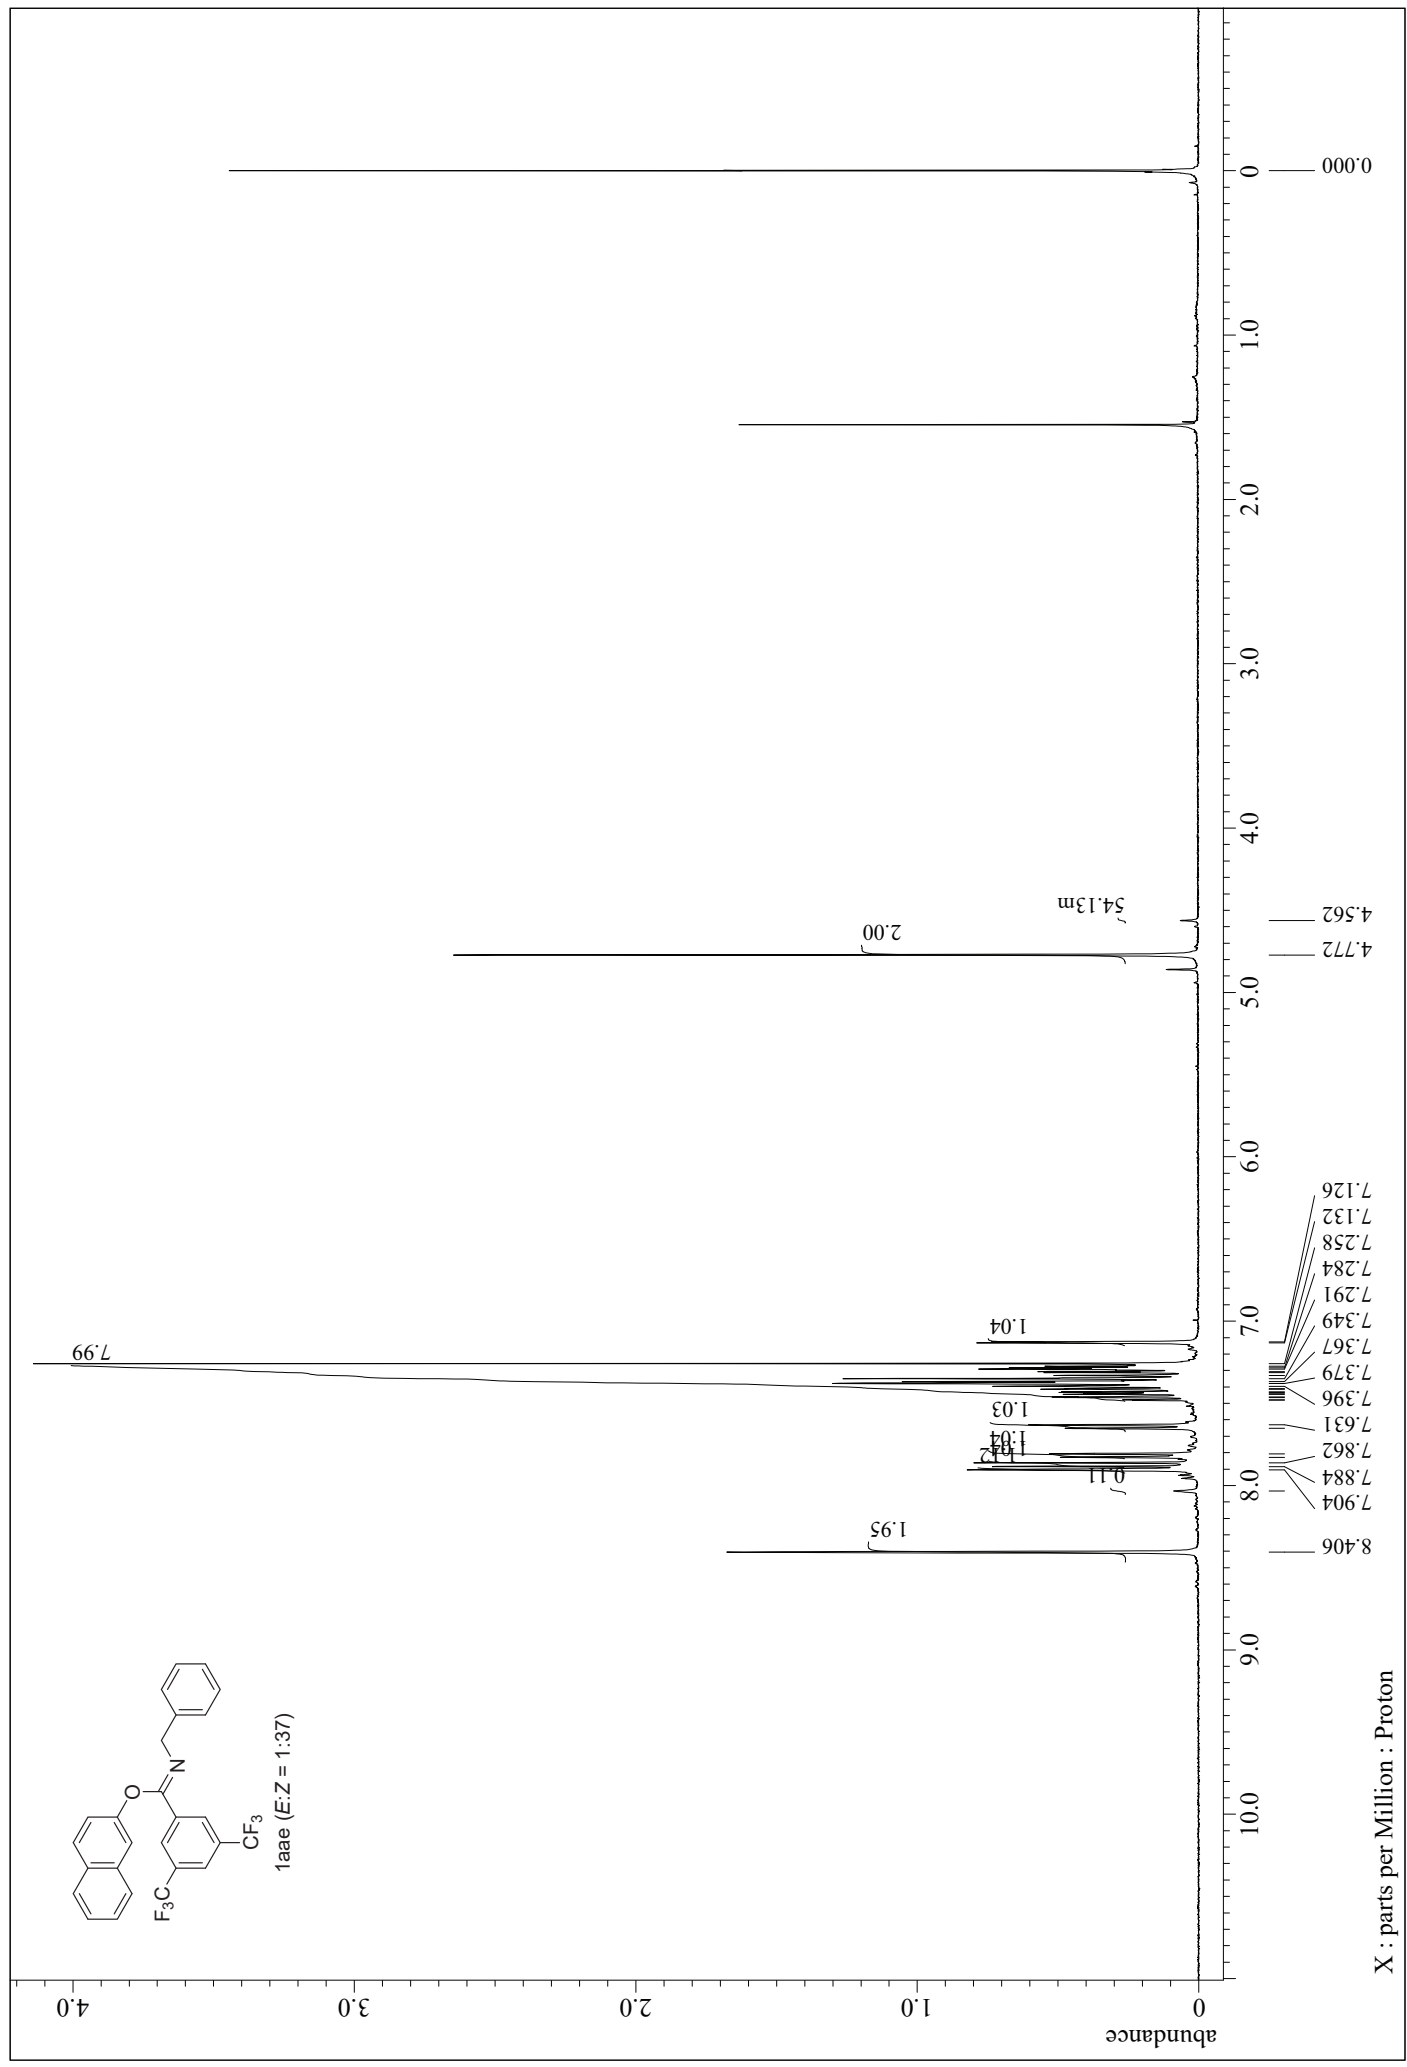

X : parts per Million : Proton

<sup>13</sup>C NMR (101 MHz, CDCl<sub>3</sub>)

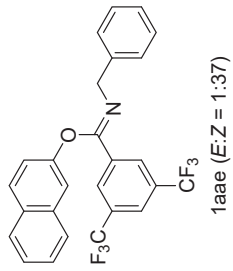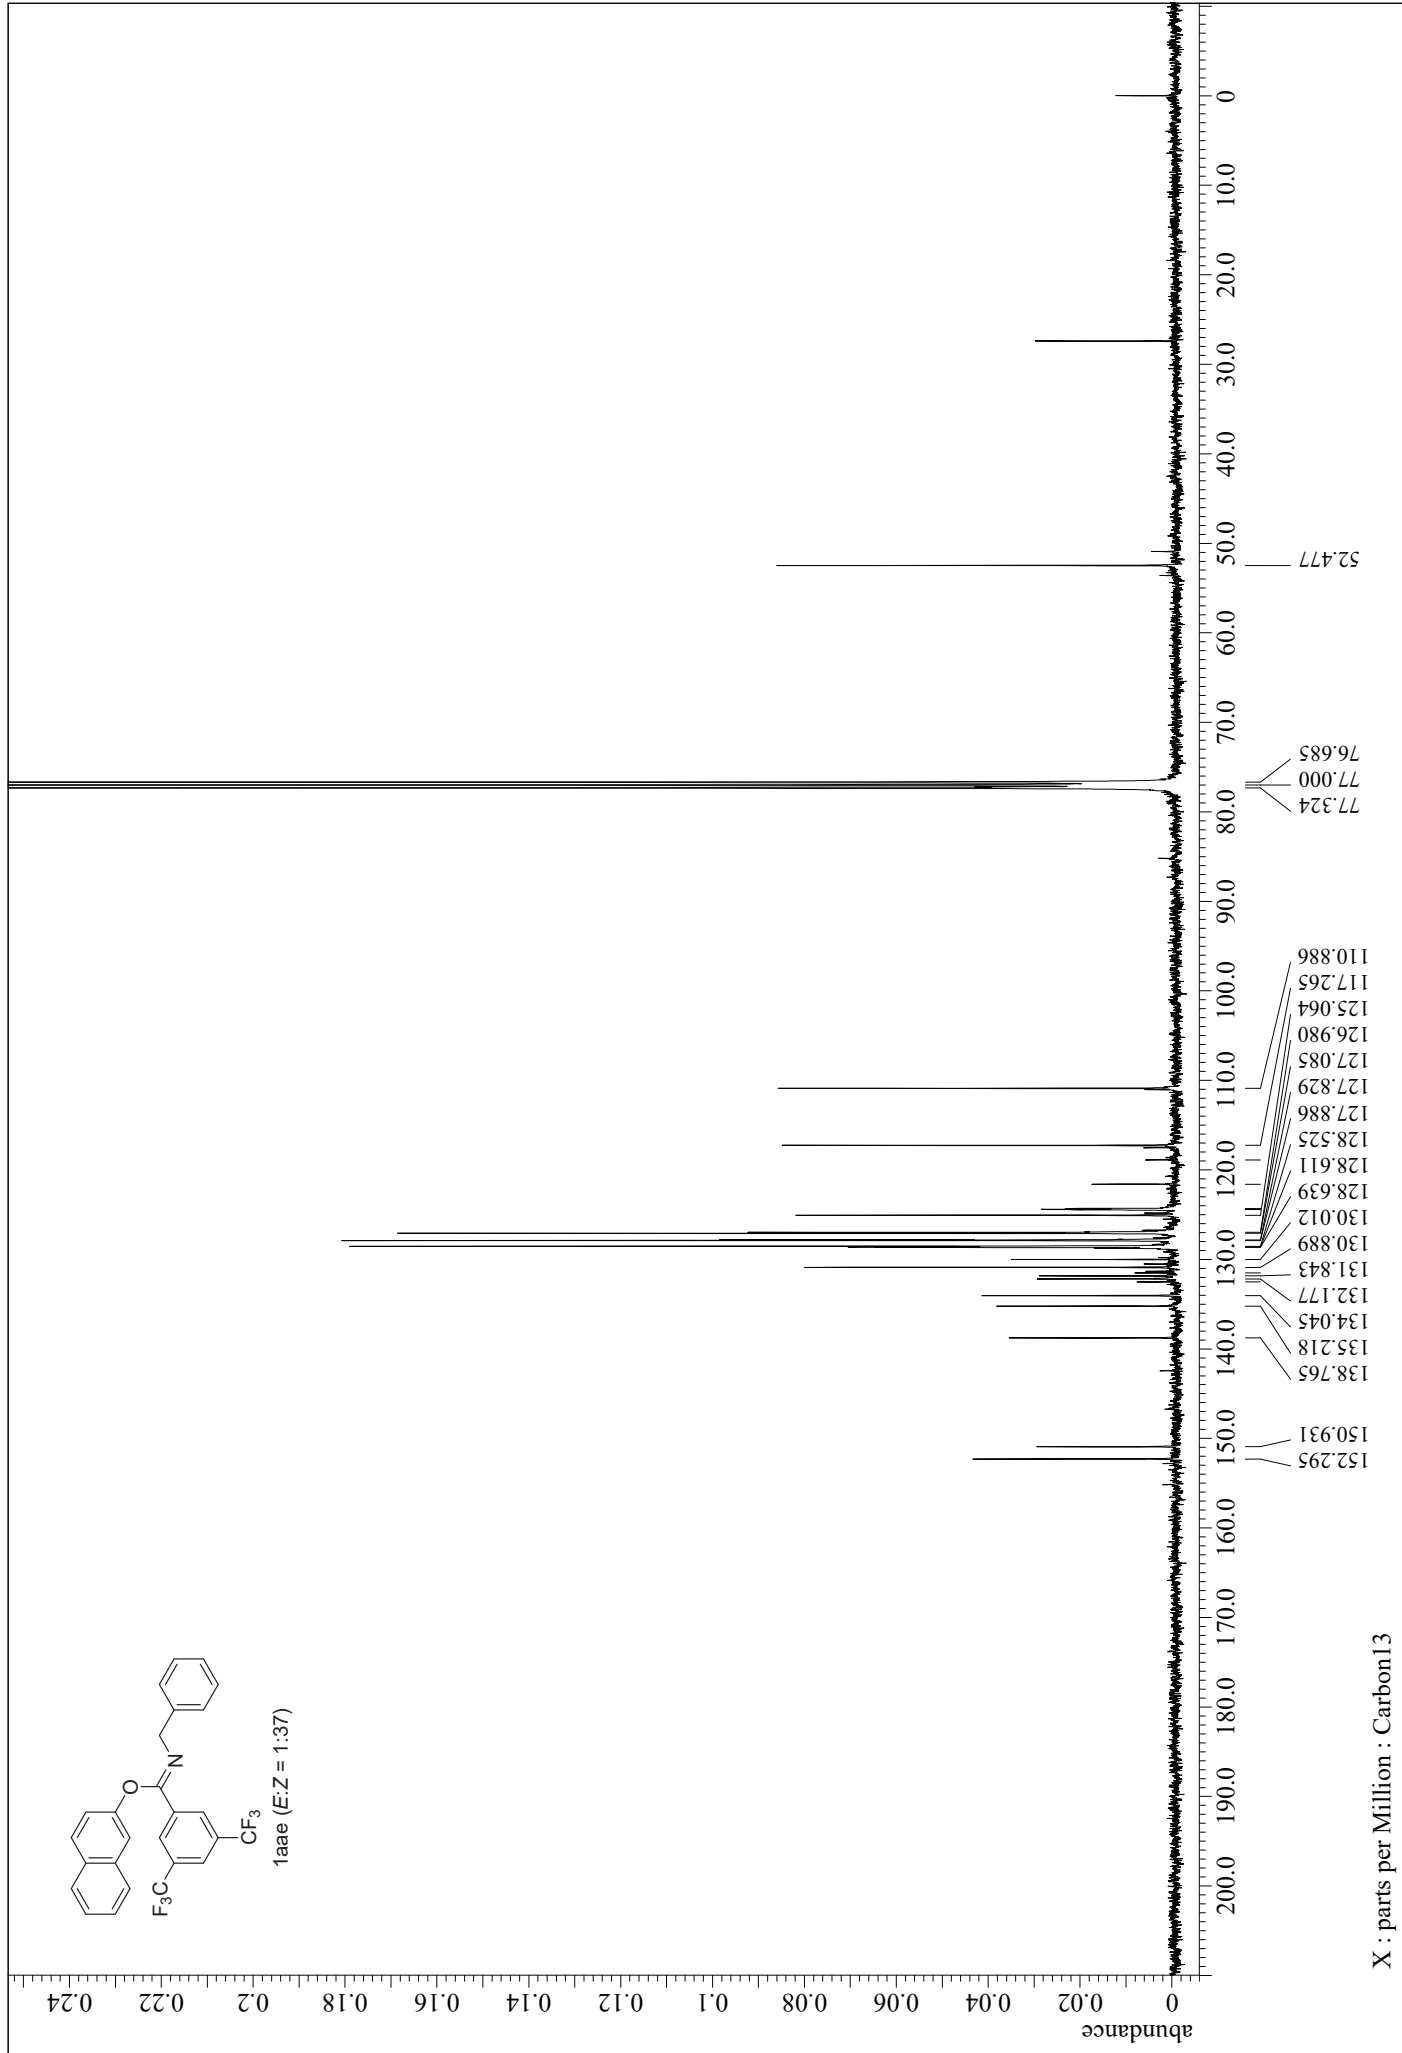

<sup>19</sup>F NMR (376 MHz, CDCl<sub>3</sub>)

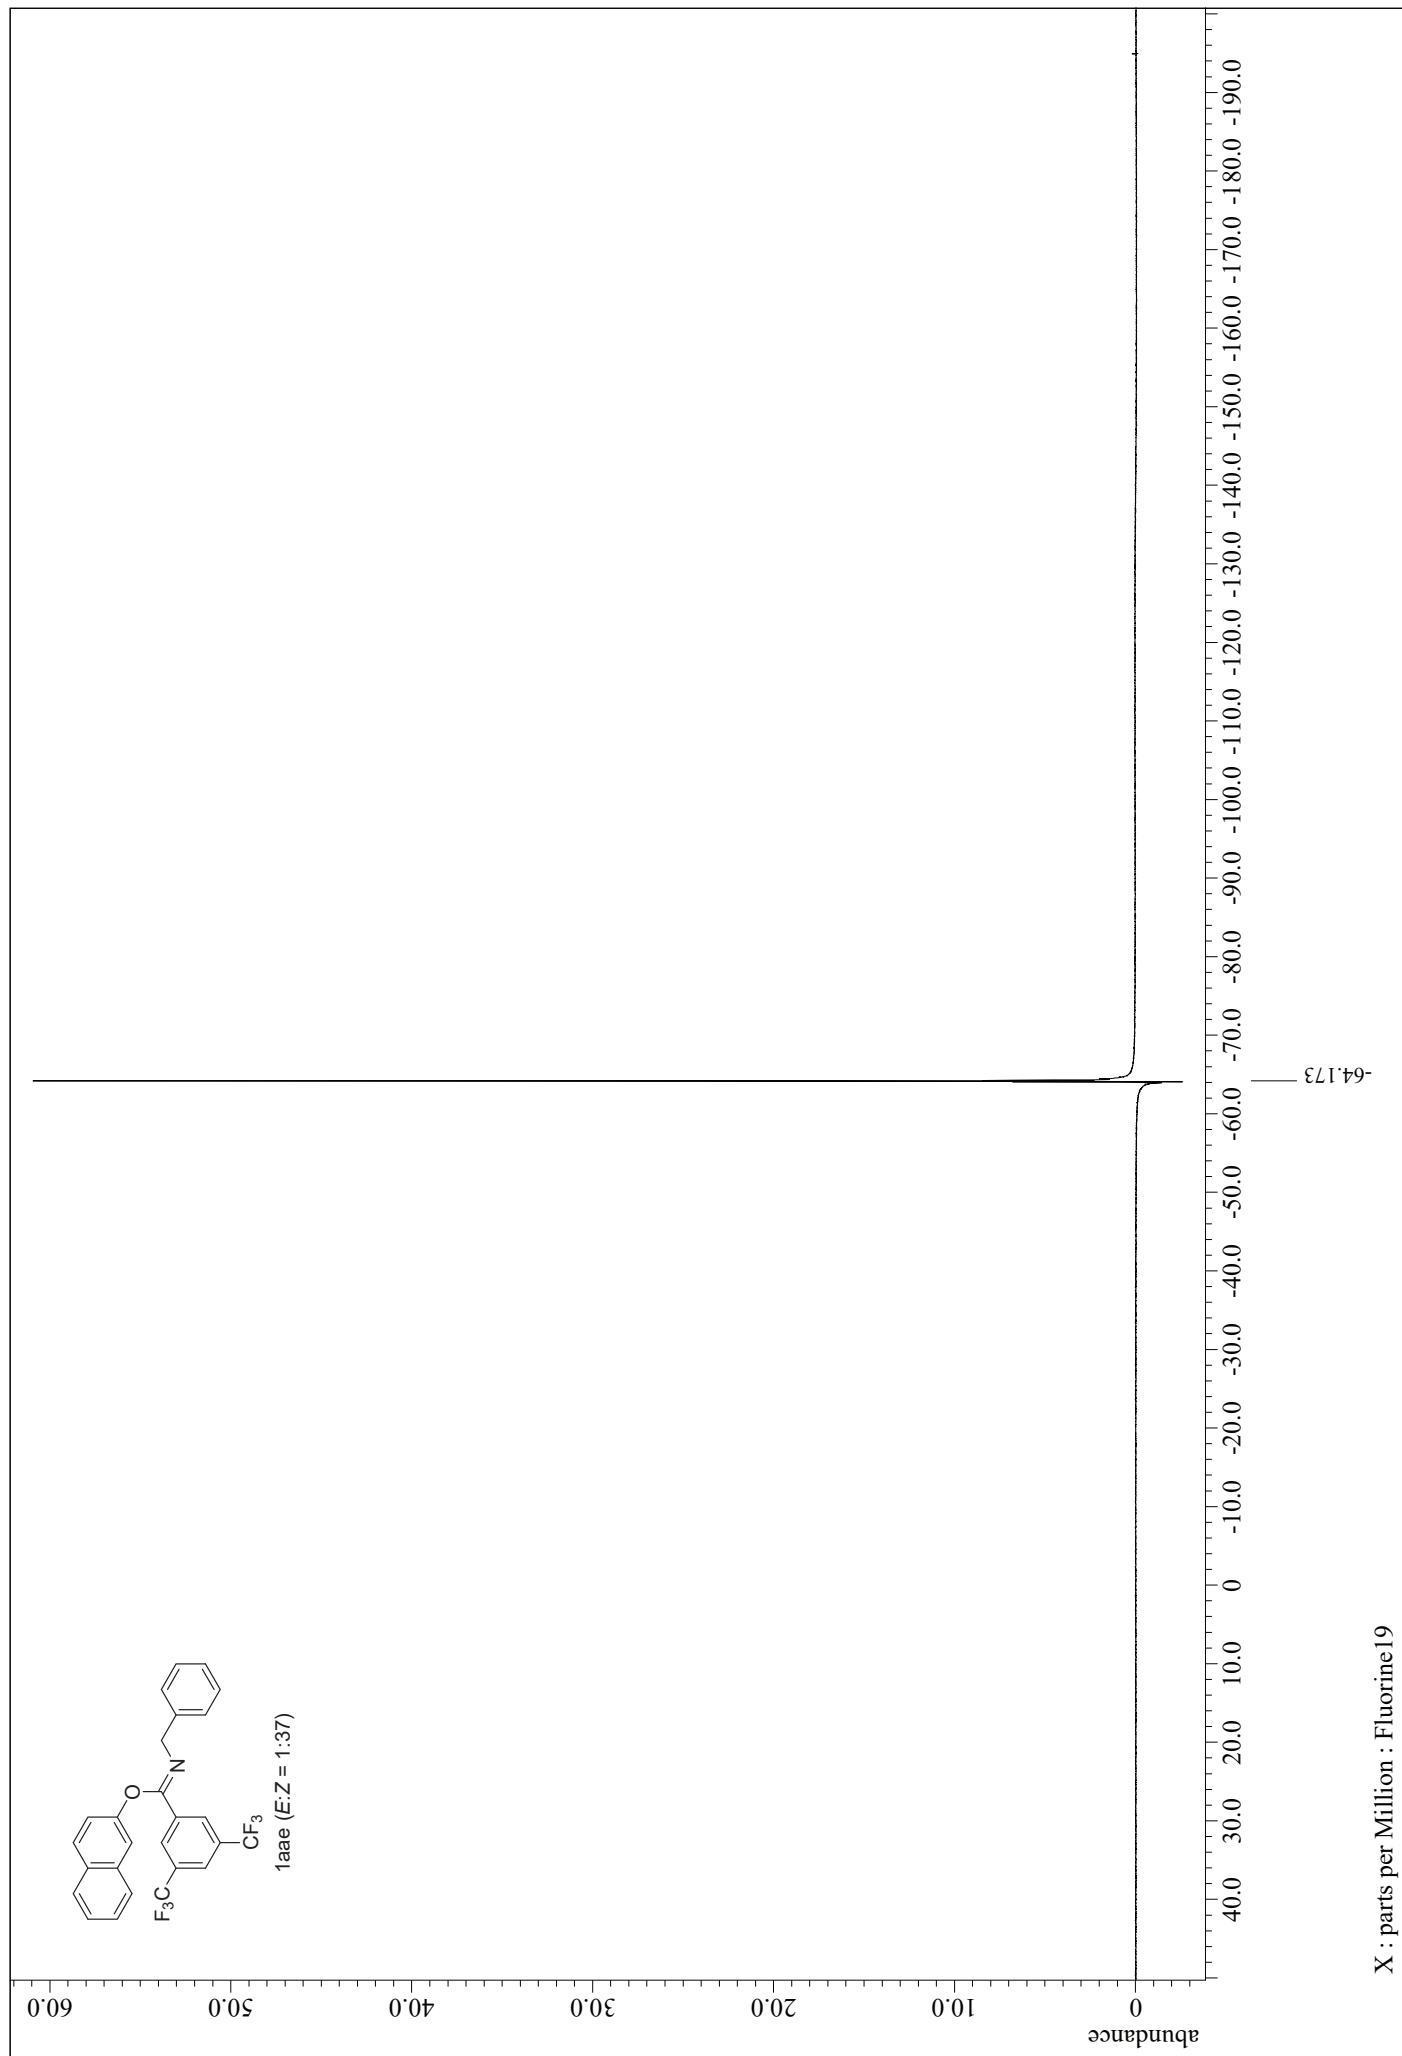



<sup>1</sup>H NMR (400 MHz, CDCl<sub>3</sub>)

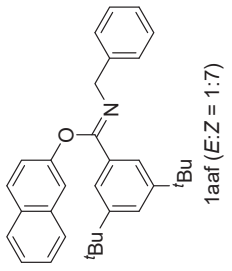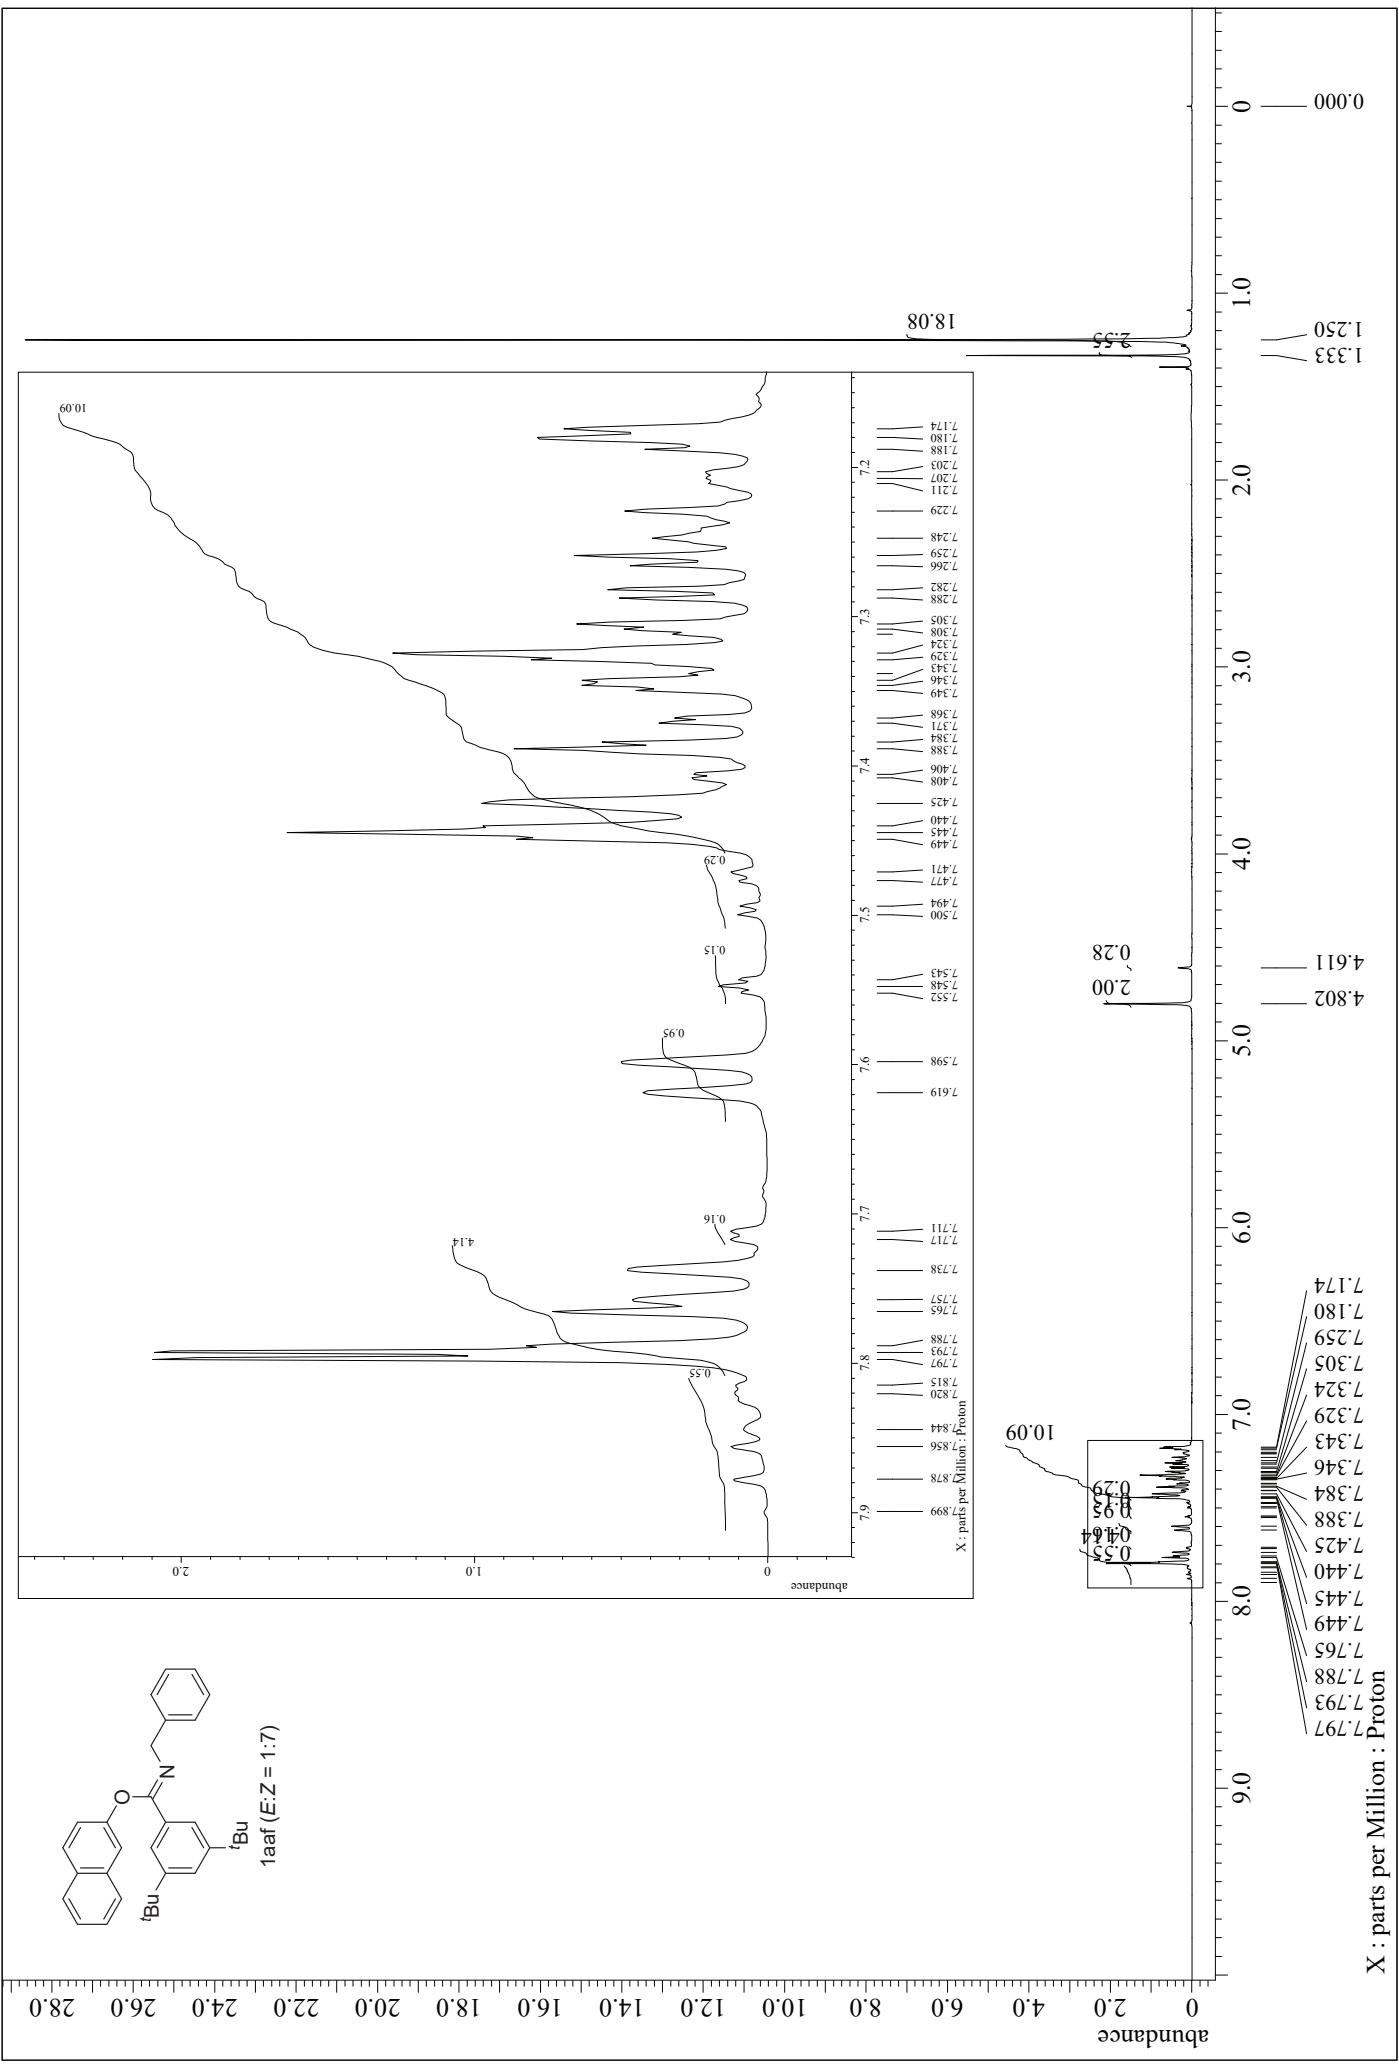

<sup>13</sup>C NMR (101 MHz, CDCl<sub>3</sub>)

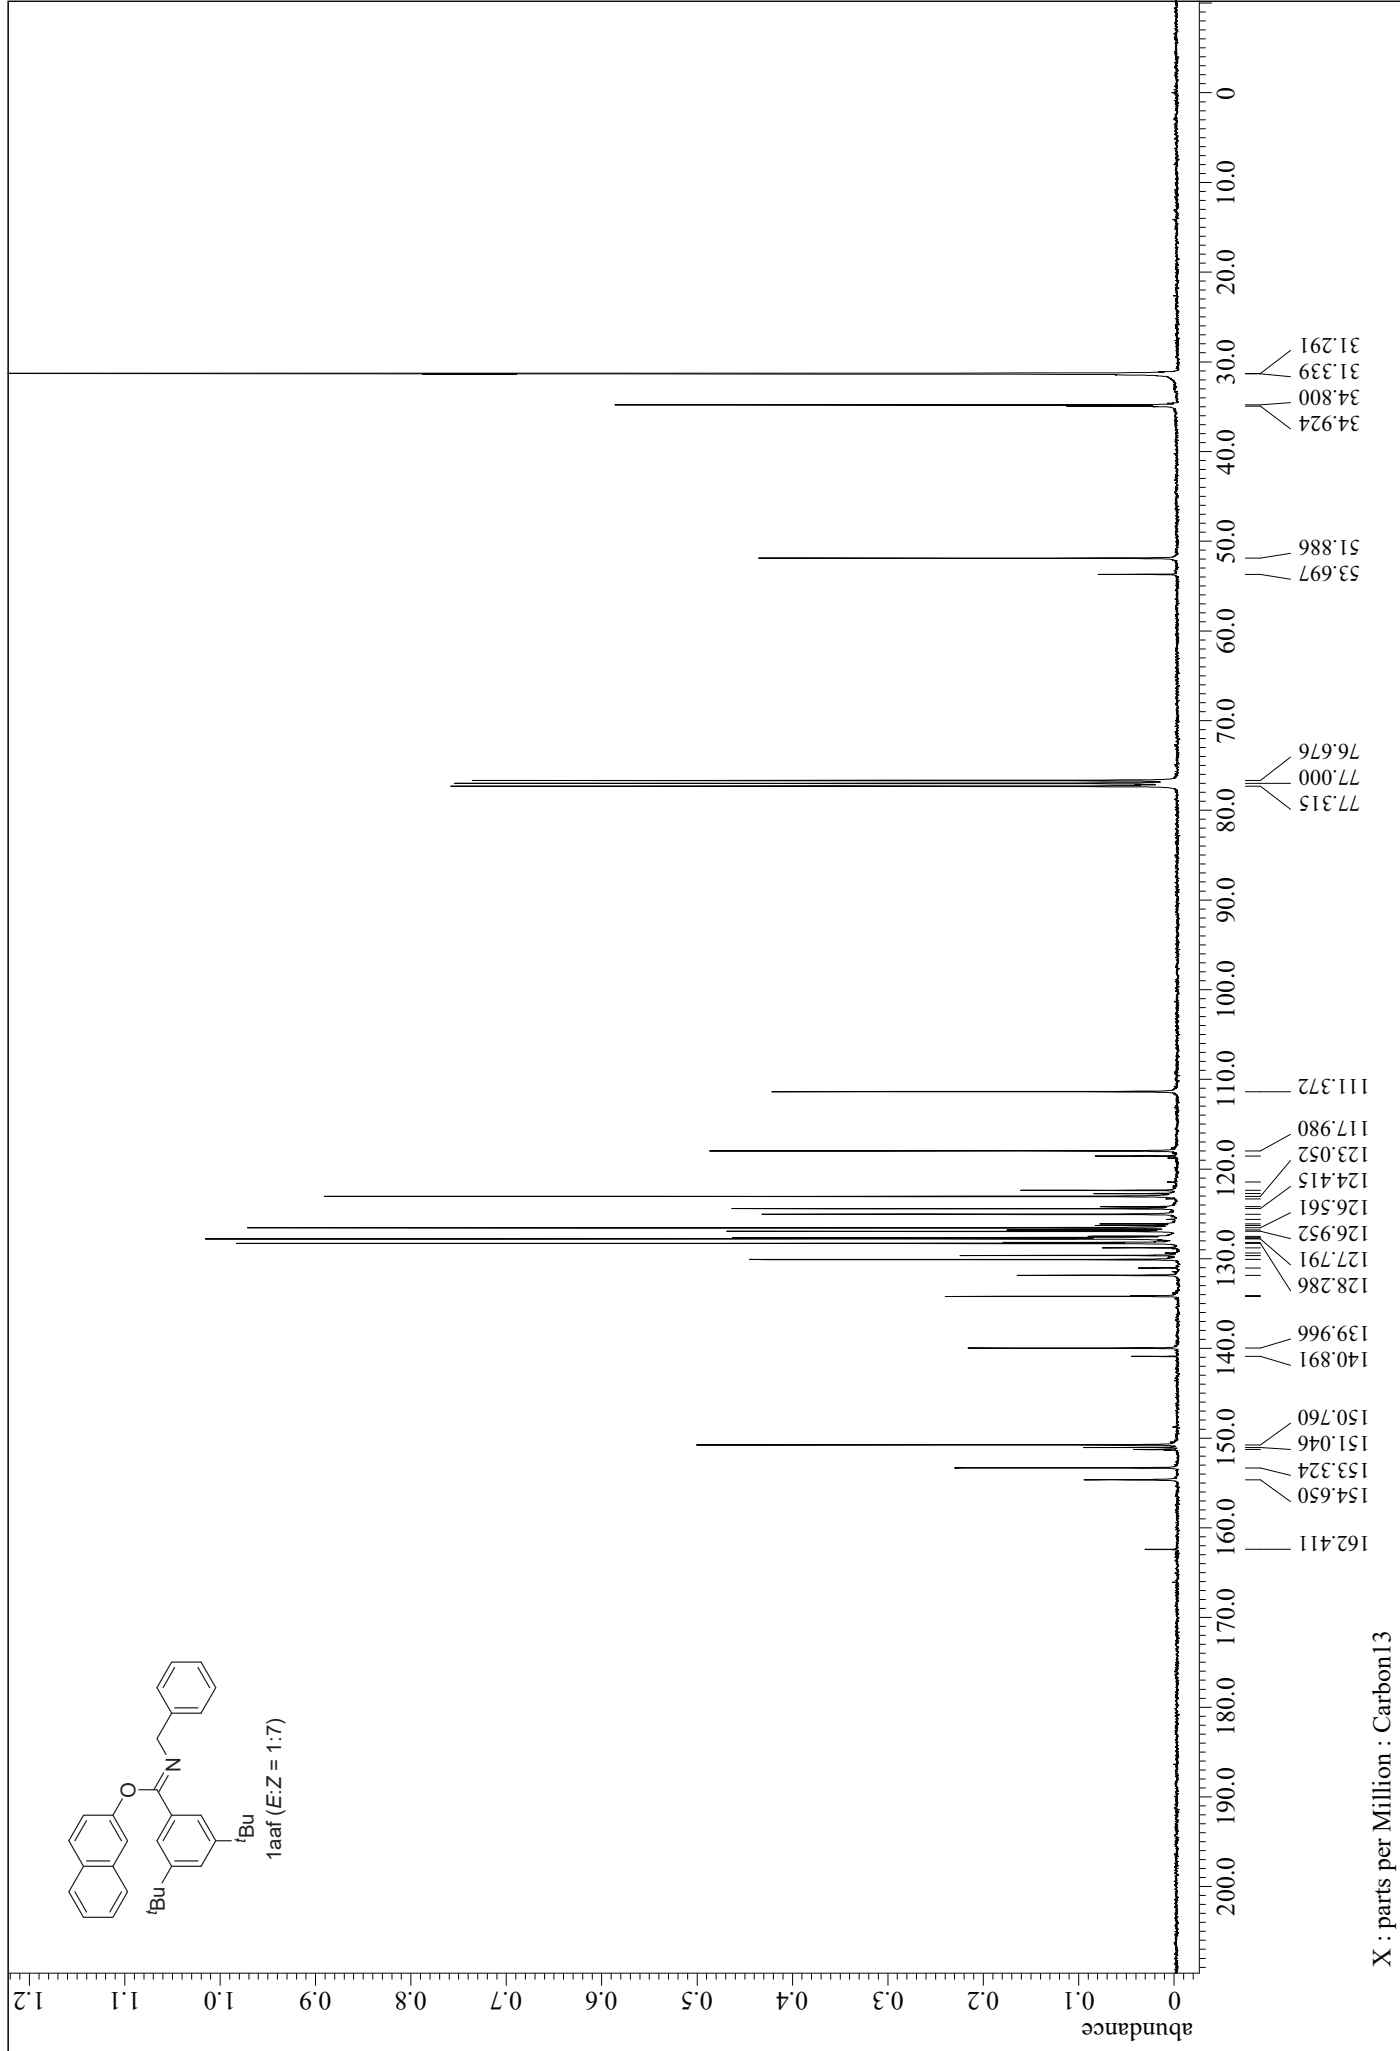

X : parts per Million : Carbon13

31.291  
31.339  
34.800  
34.924

51.886  
53.697

76.676  
77.000  
77.315

111.372  
117.980  
123.052  
124.415  
126.561  
126.952  
127.791  
128.286

139.966  
140.891  
150.760  
151.046  
153.324  
154.650

162.411

<sup>1</sup>H NMR (400 MHz, CDCl<sub>3</sub>)

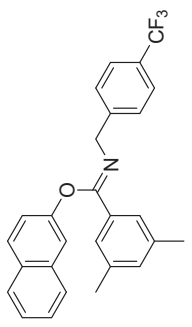

1 abd (E/Z = 1:9.5)

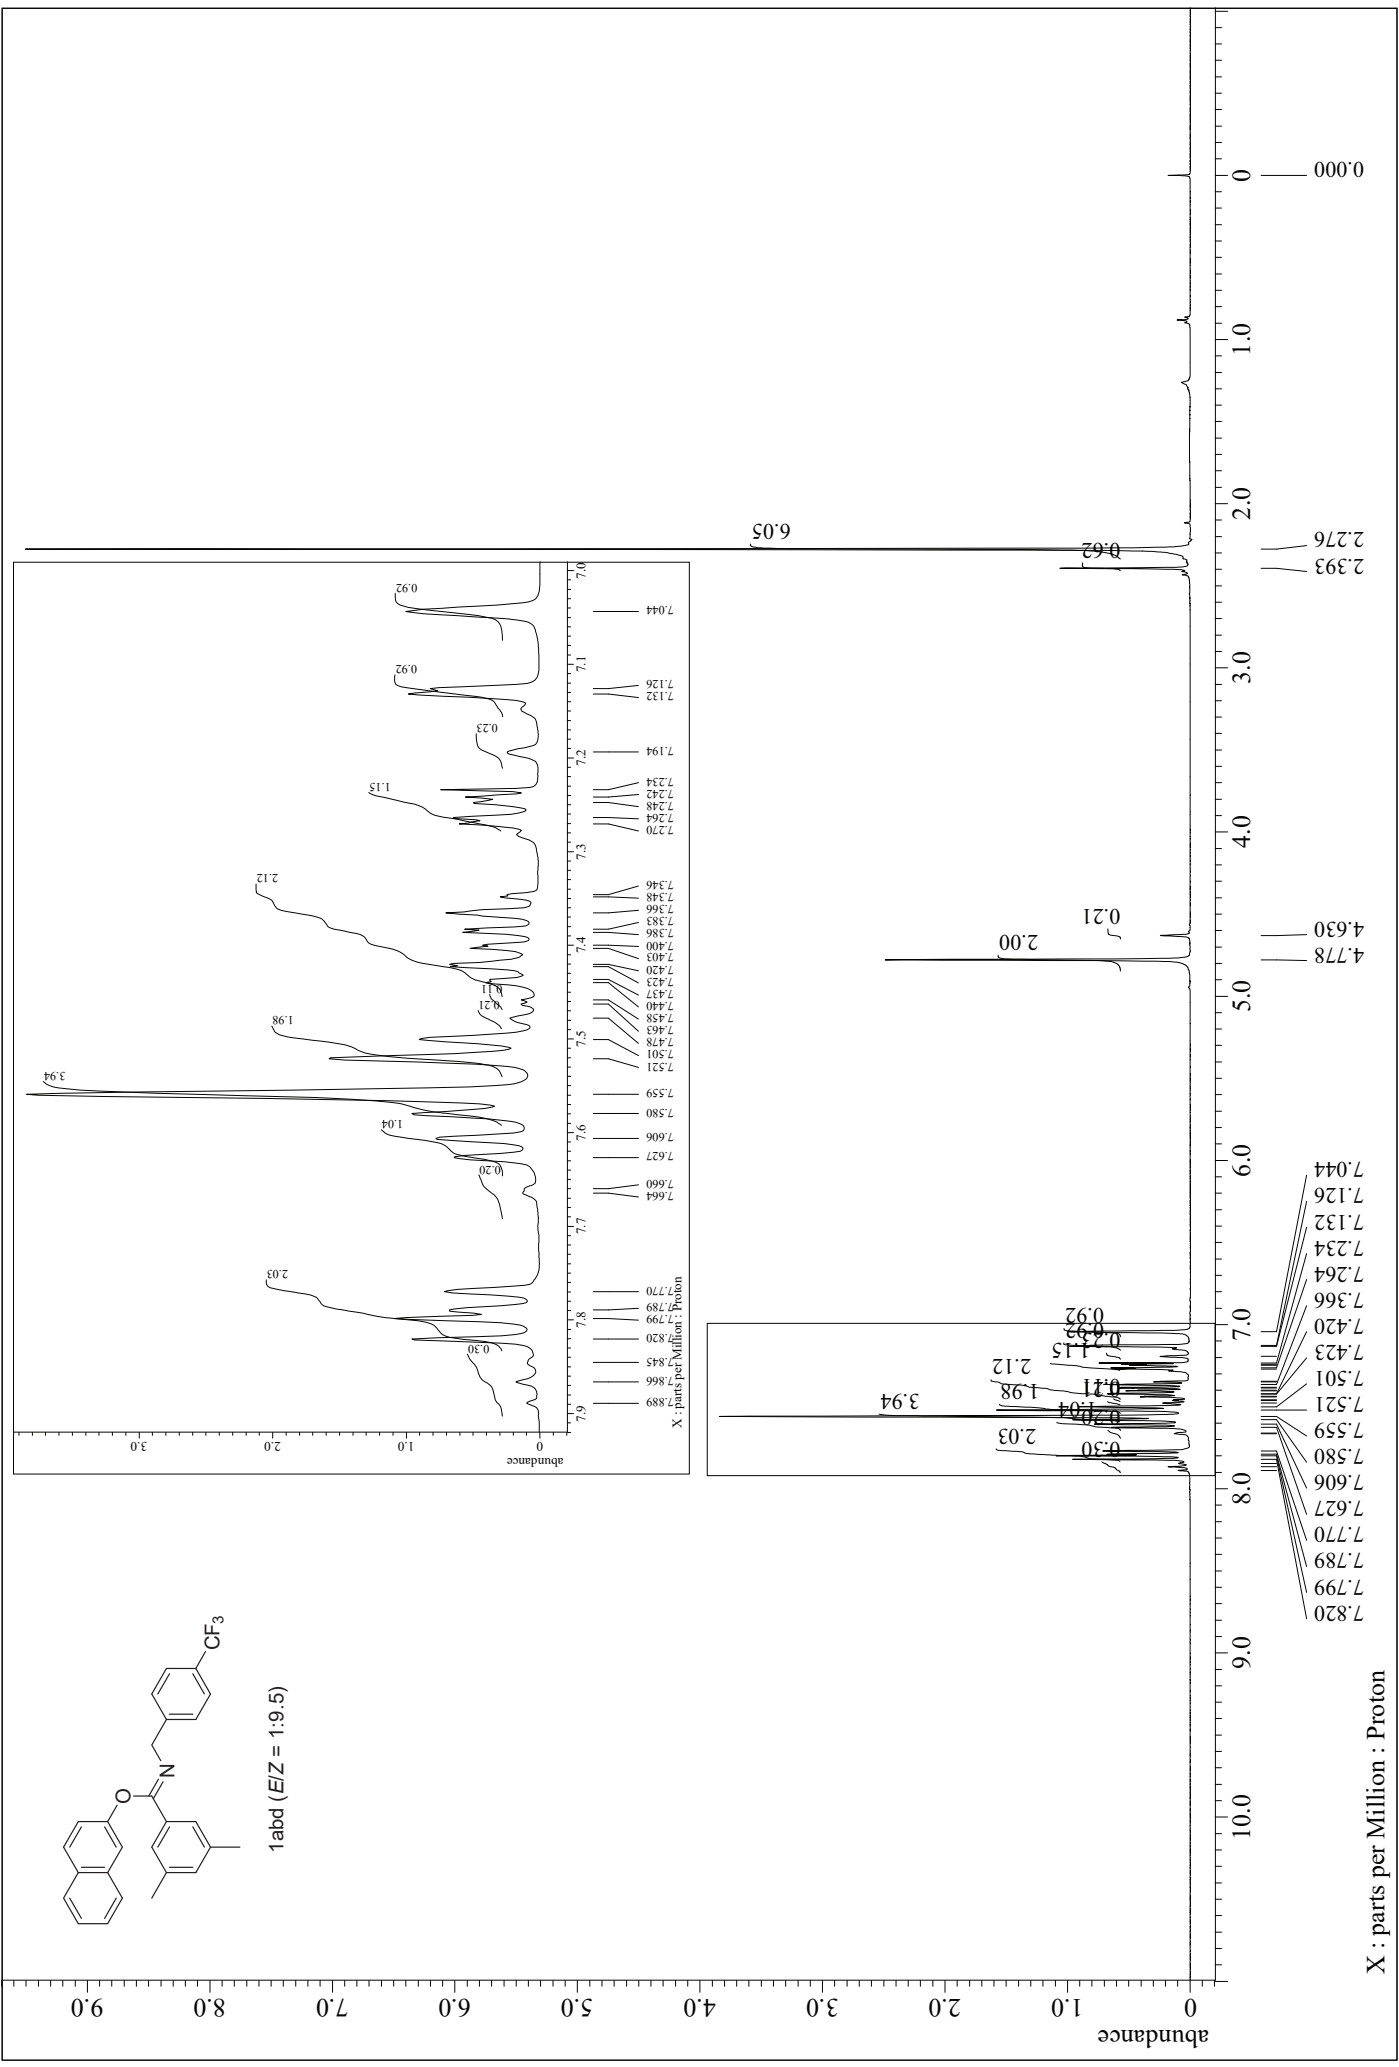

<sup>13</sup>C NMR (101 MHz, CDCl<sub>3</sub>)

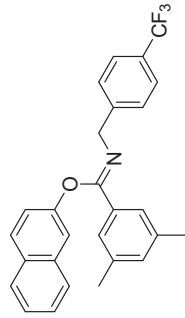

1 abd (E/Z = 1:9.5)

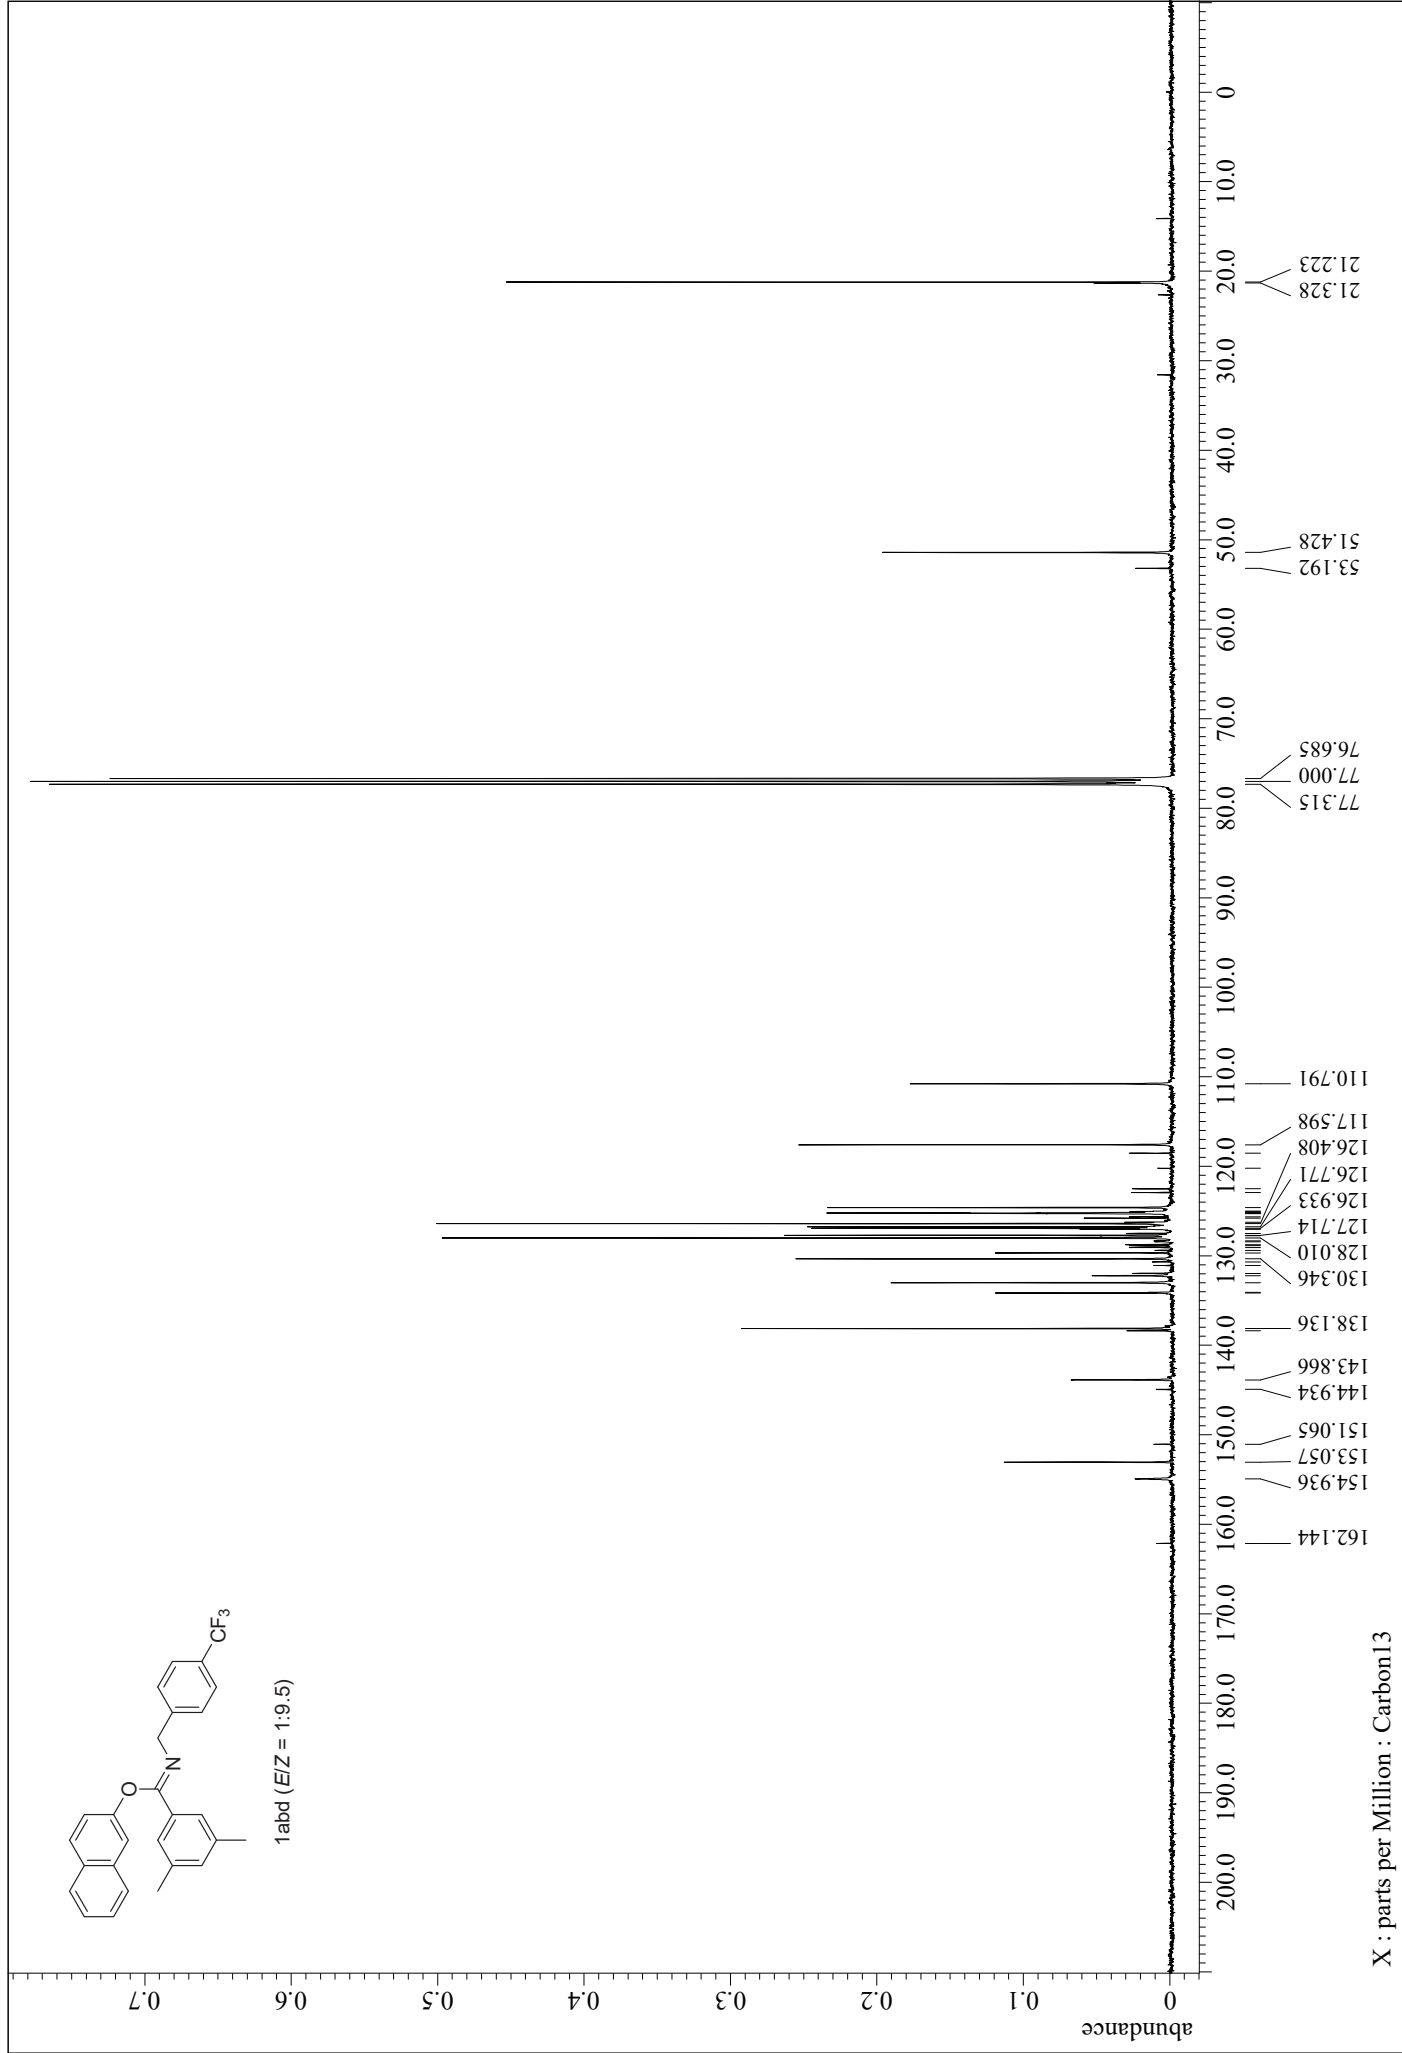

<sup>19</sup>F NMR (376 MHz, CDCl<sub>3</sub>)

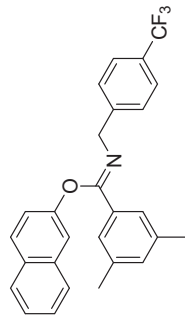

1 abd (E/Z = 1:9.5)

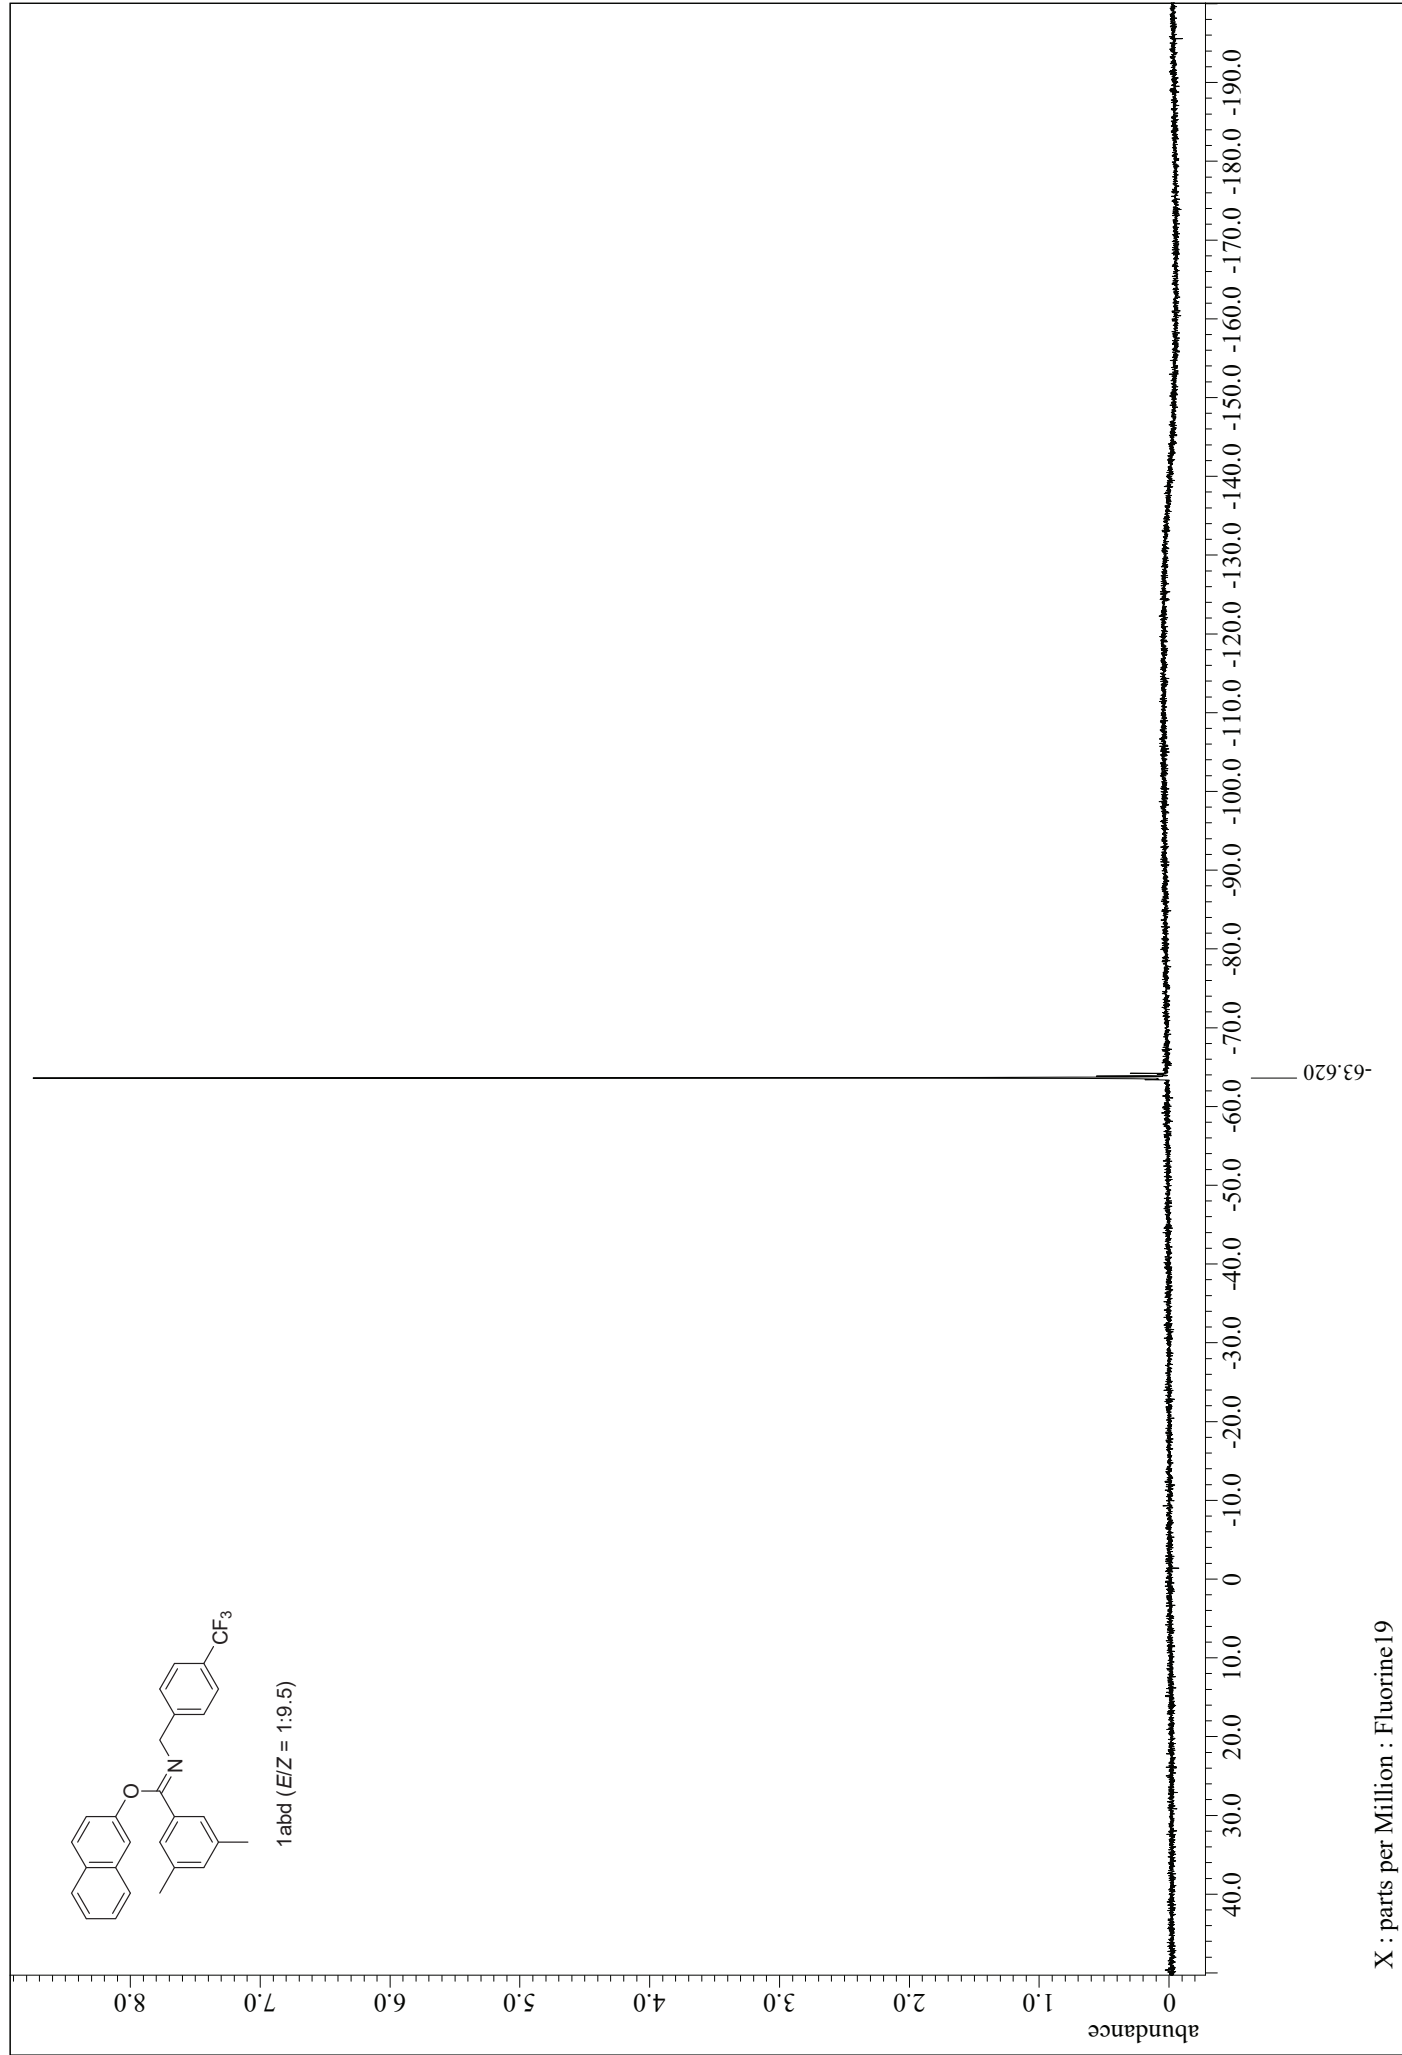

<sup>1</sup>H NMR (400 MHz, CDCl<sub>3</sub>)

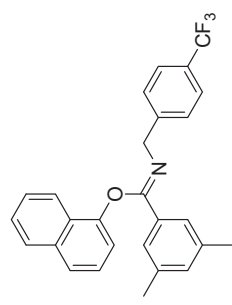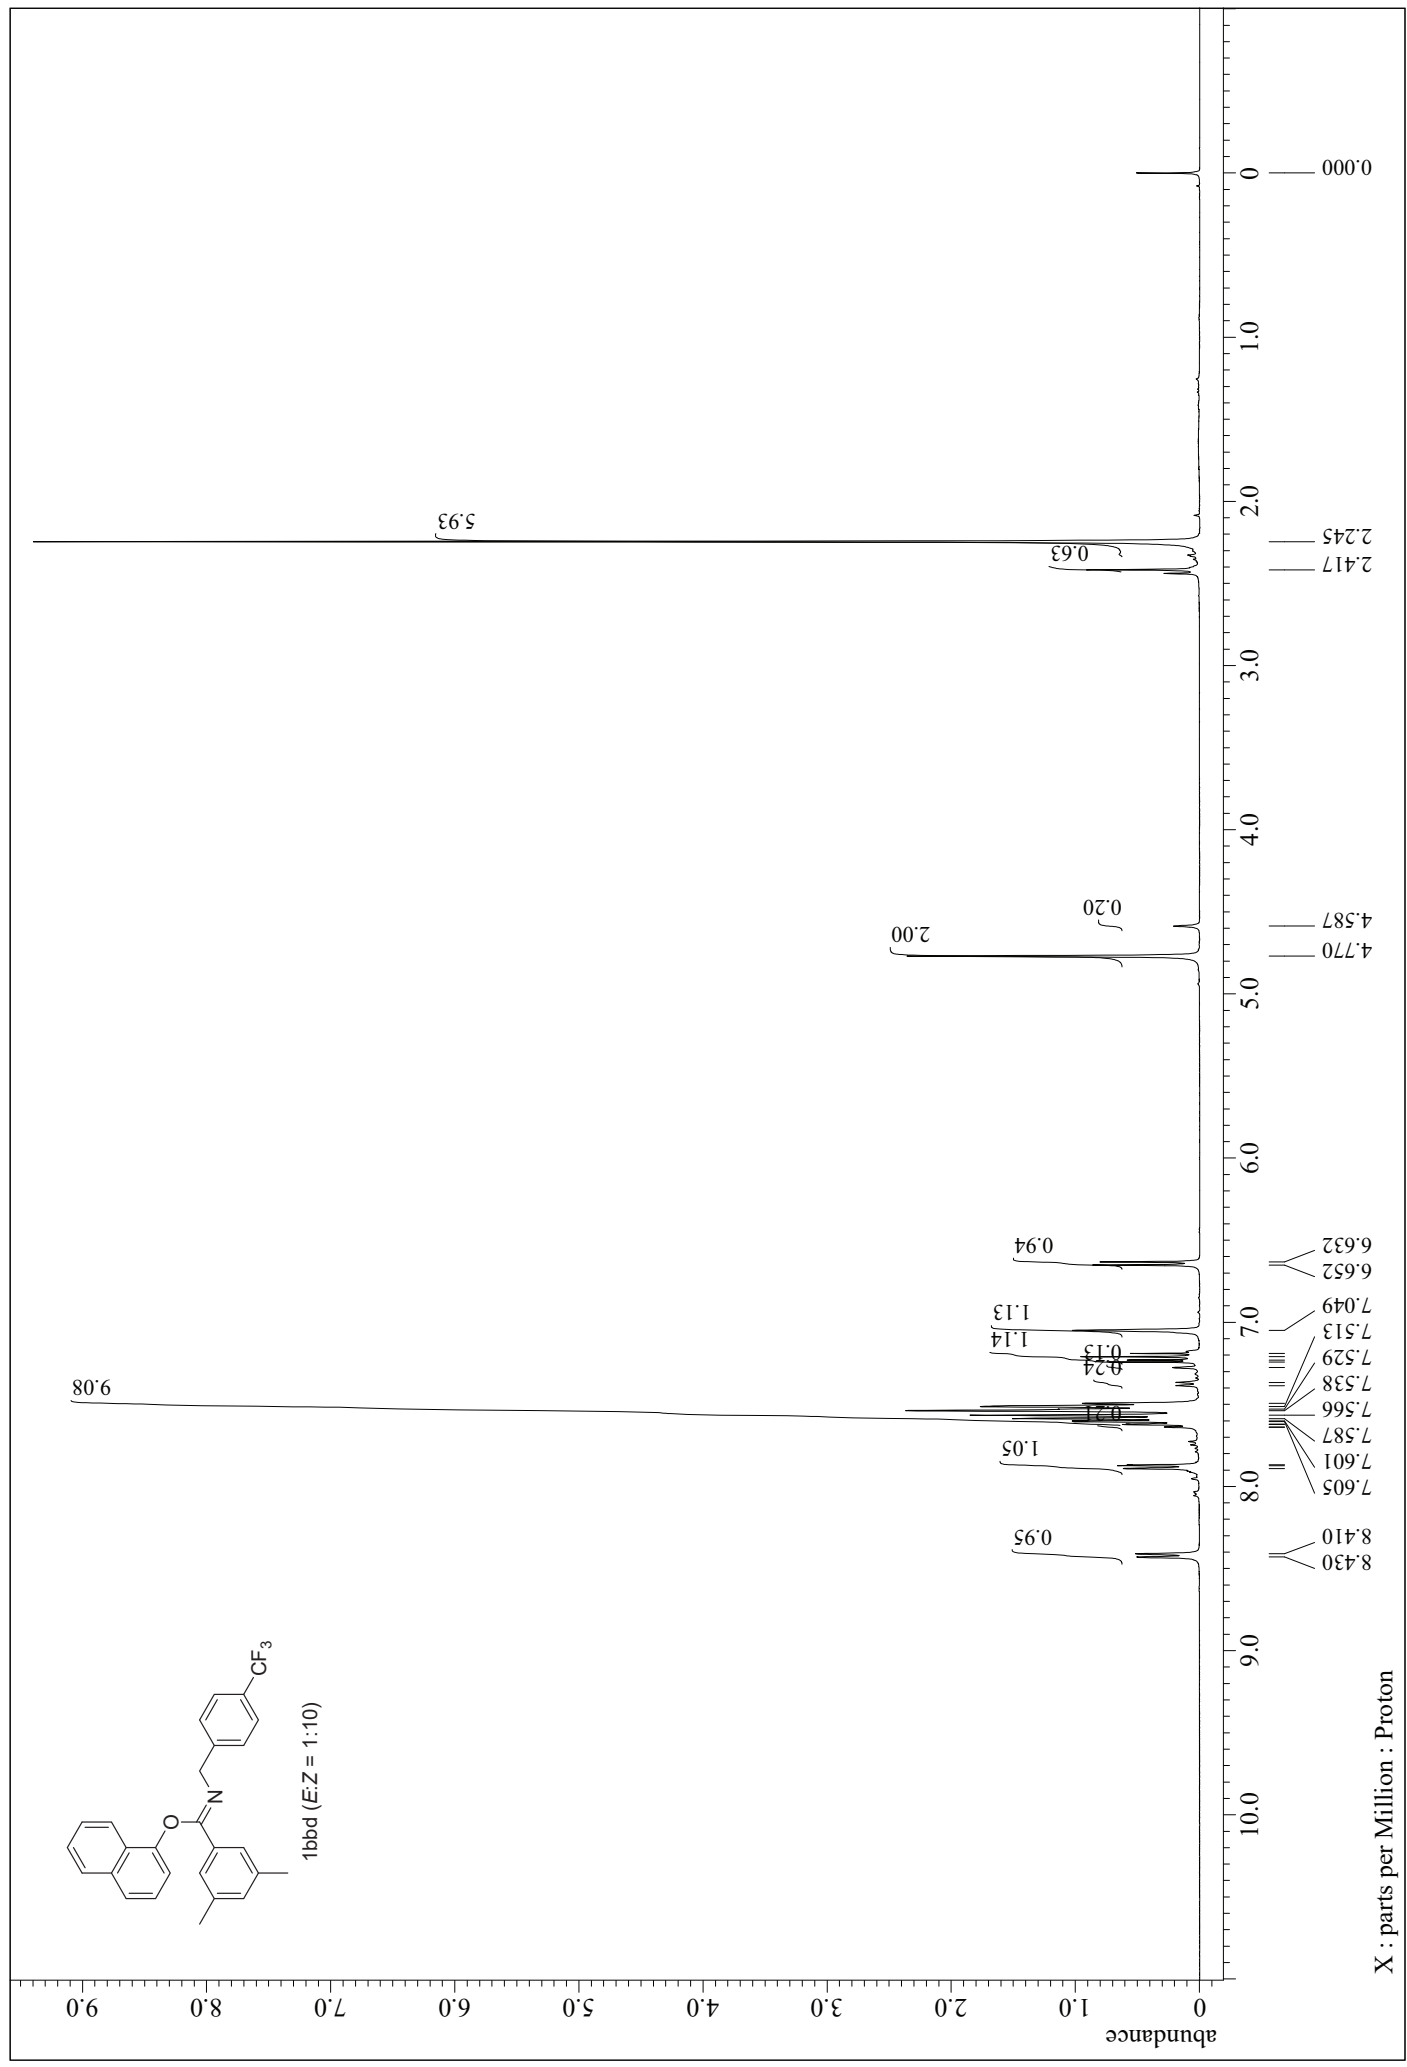

X : parts per Million : Proton

<sup>13</sup>C NMR (101 MHz, CDCl<sub>3</sub>)

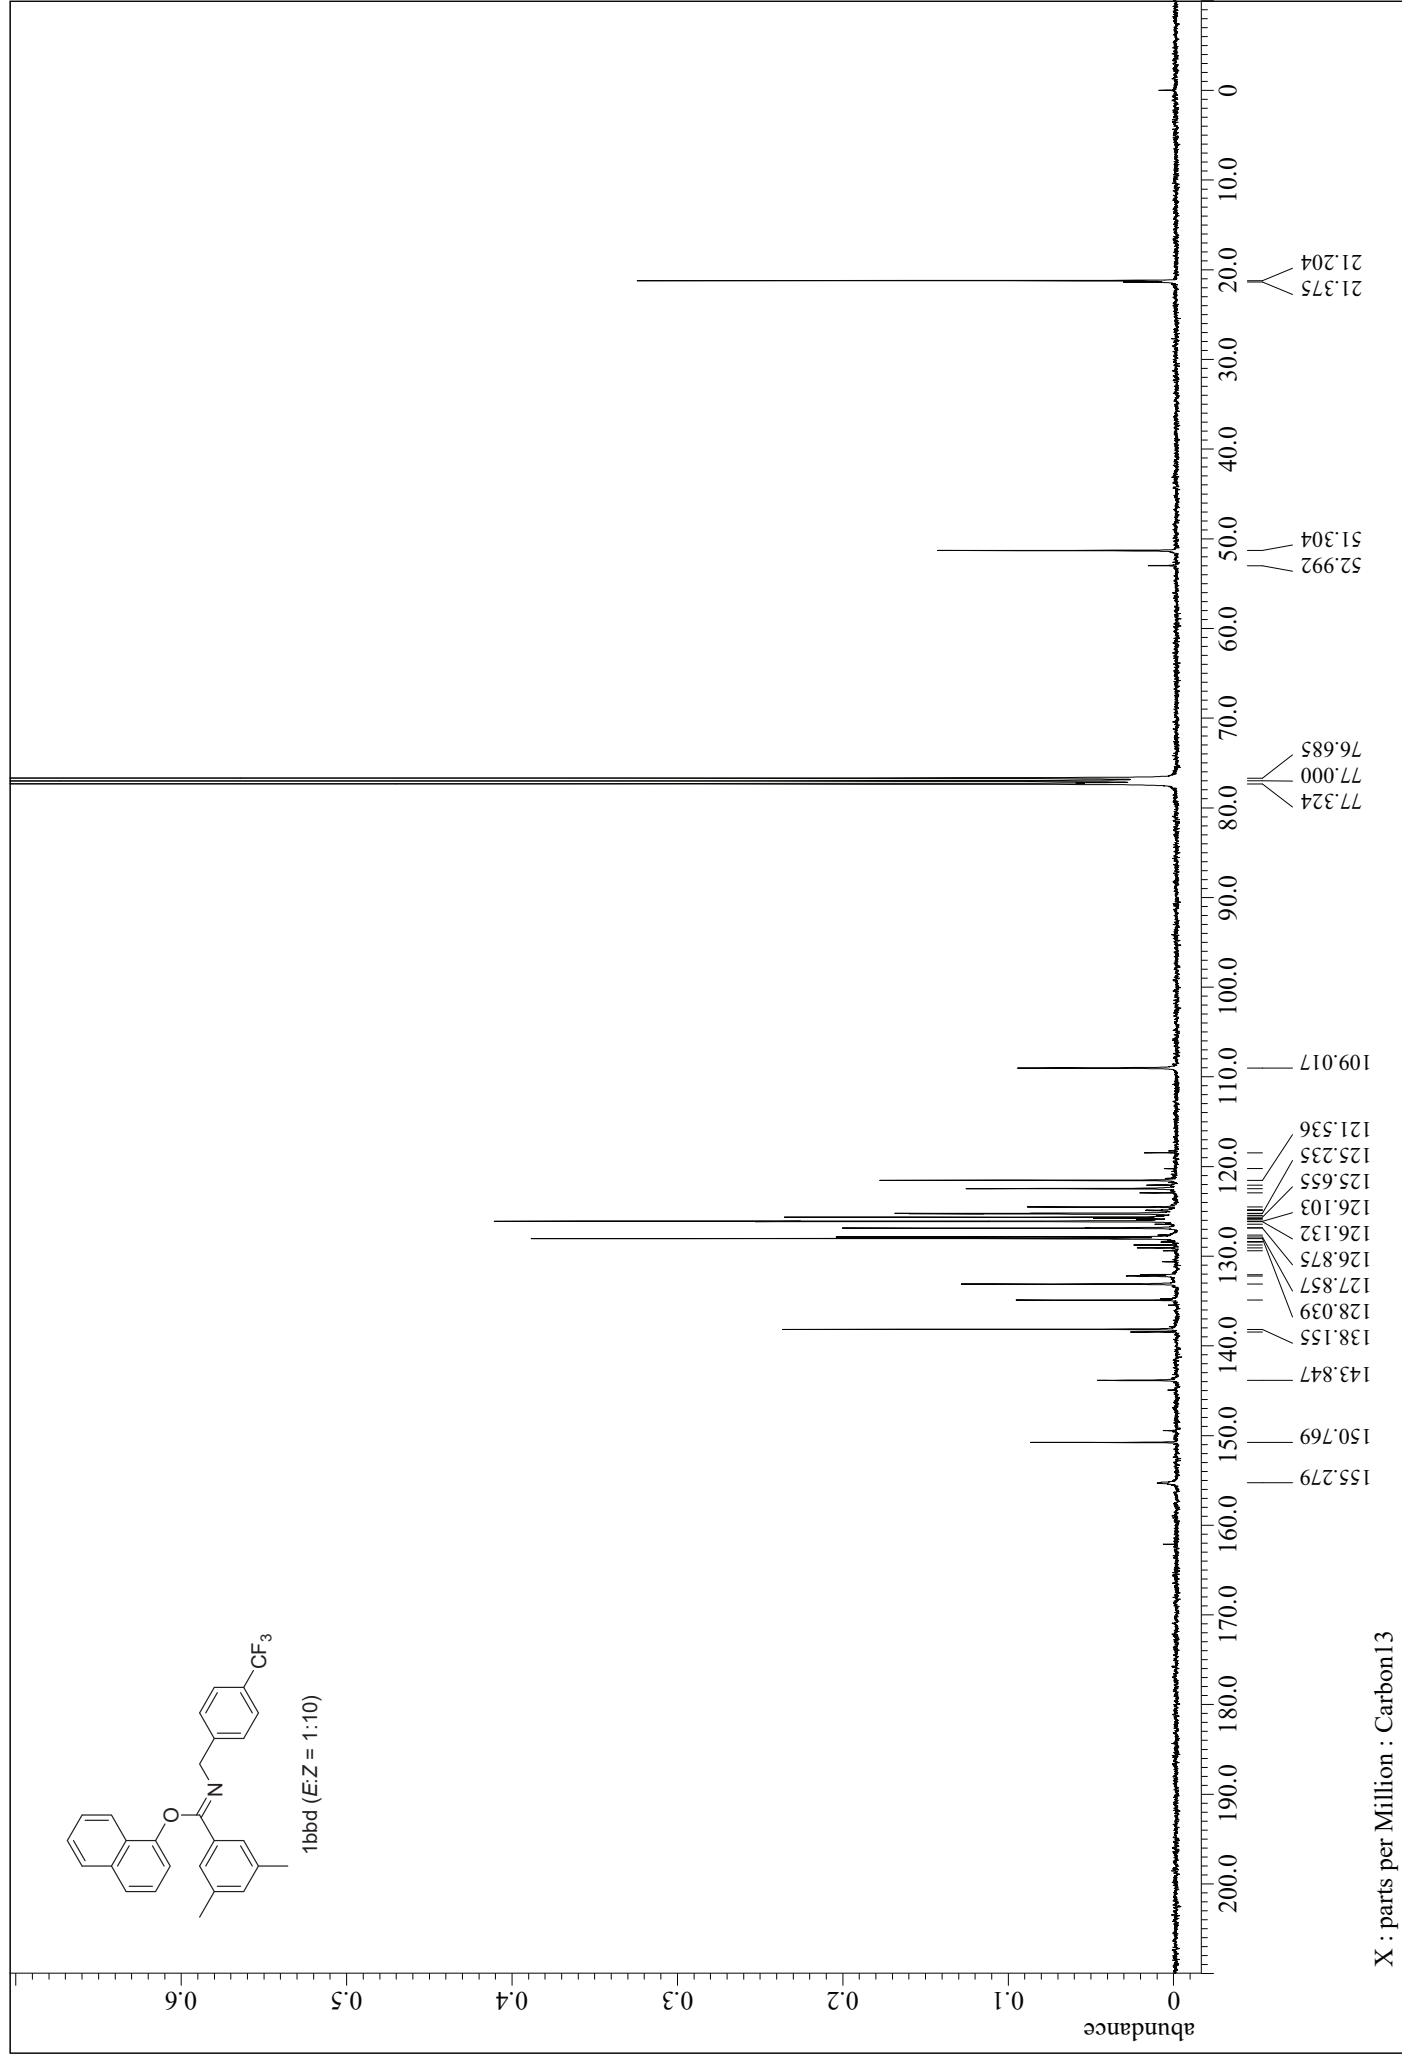

<sup>19</sup>F NMR (376 MHz, CDCl<sub>3</sub>)

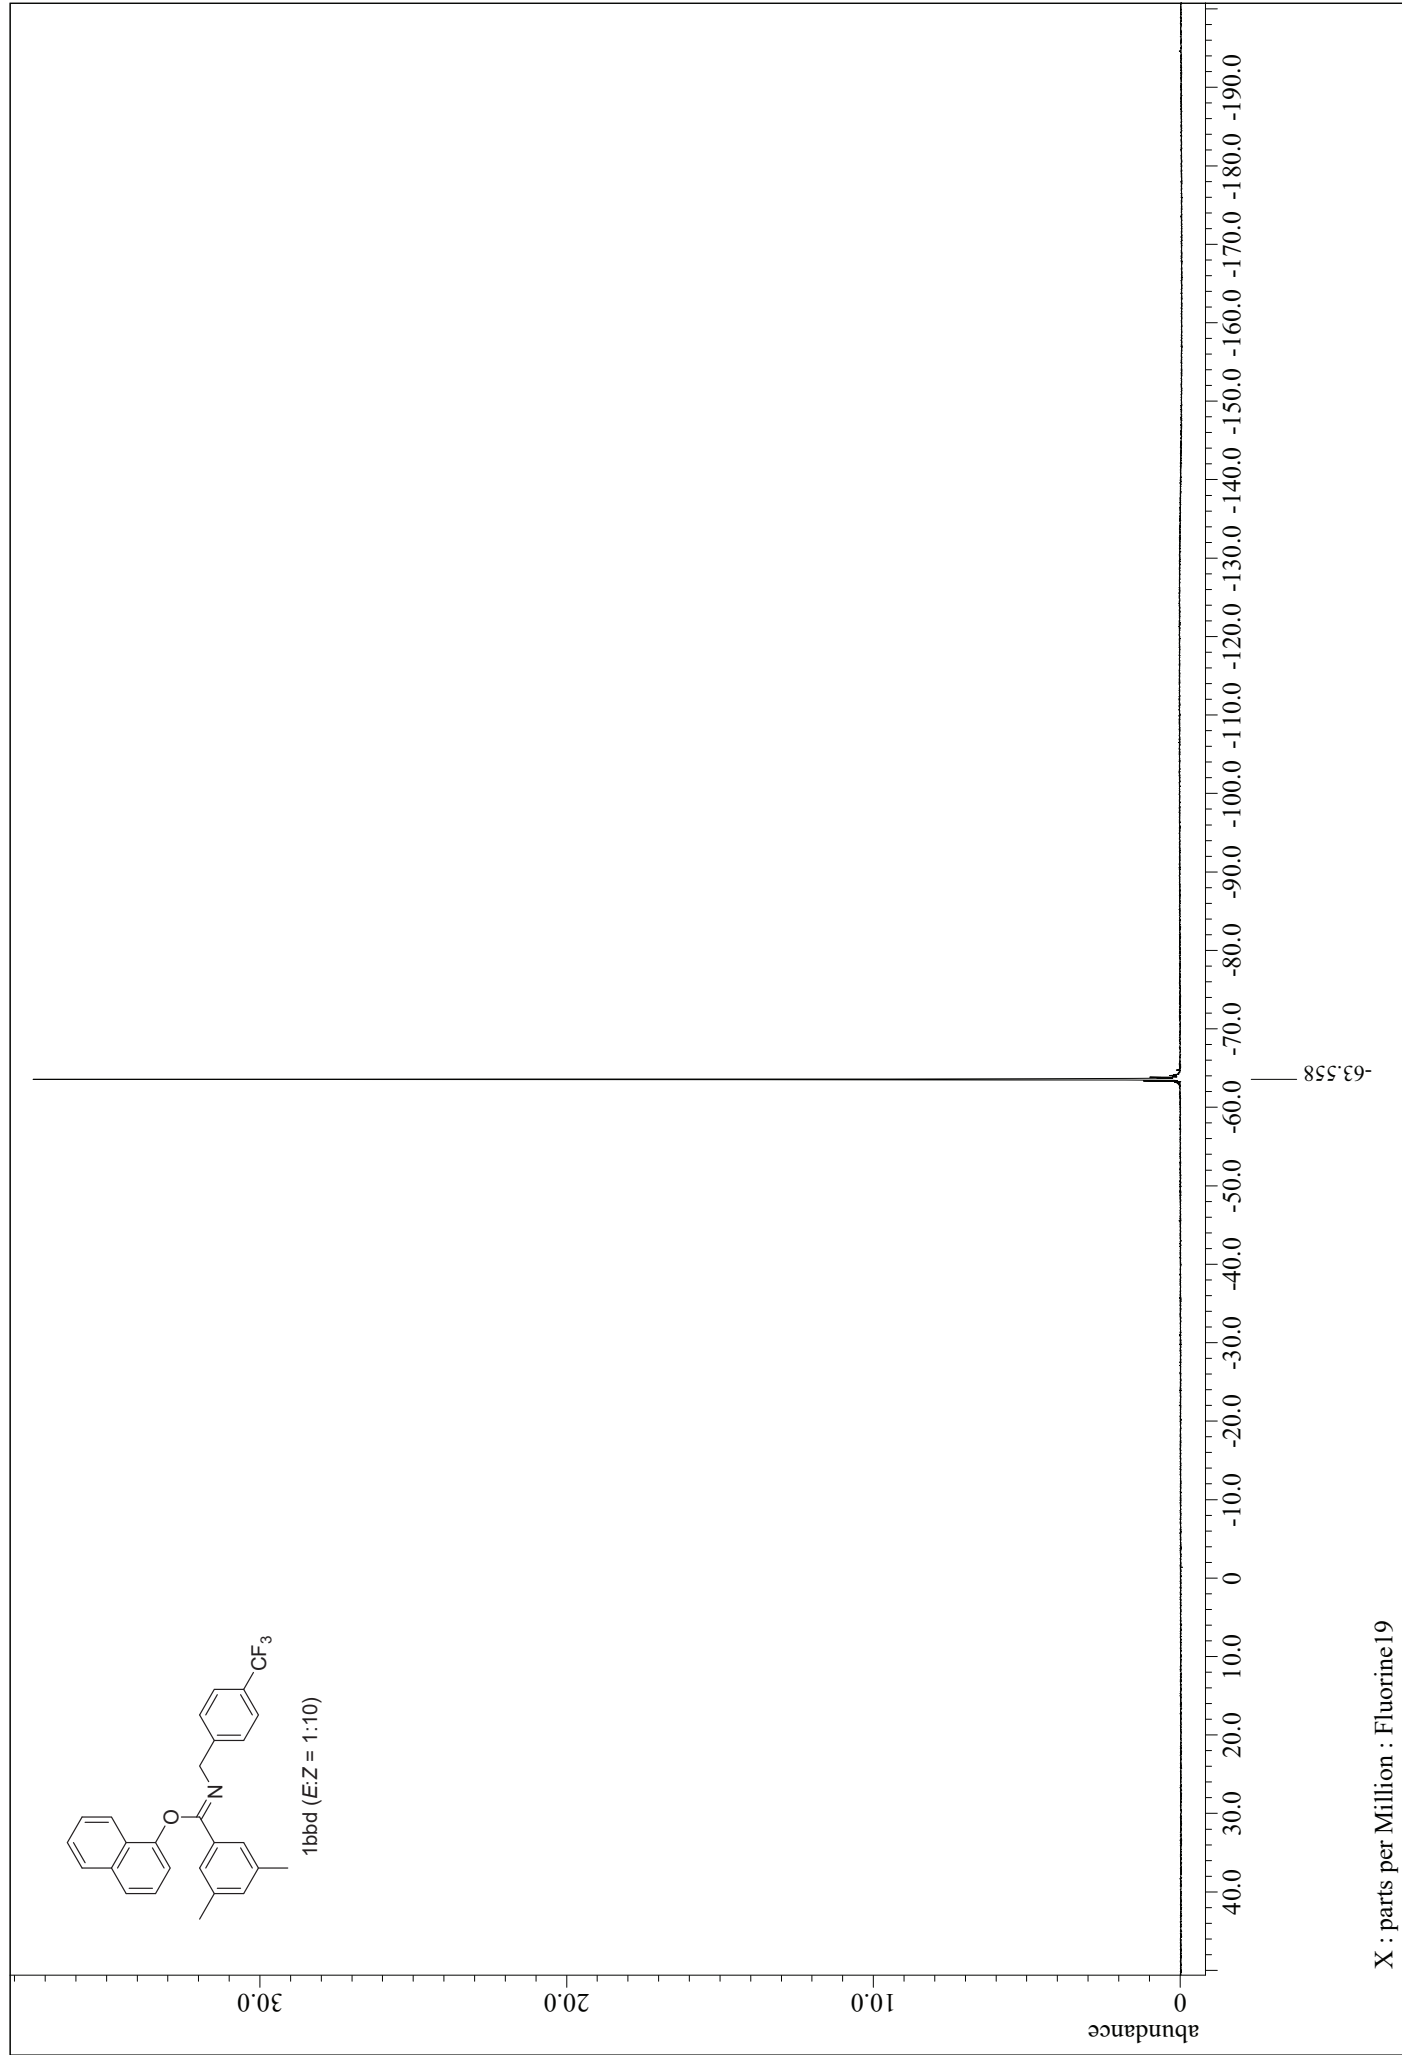



<sup>1</sup>H NMR (400 MHz, CDCl<sub>3</sub>)

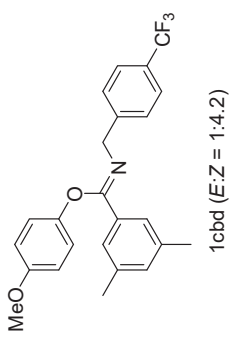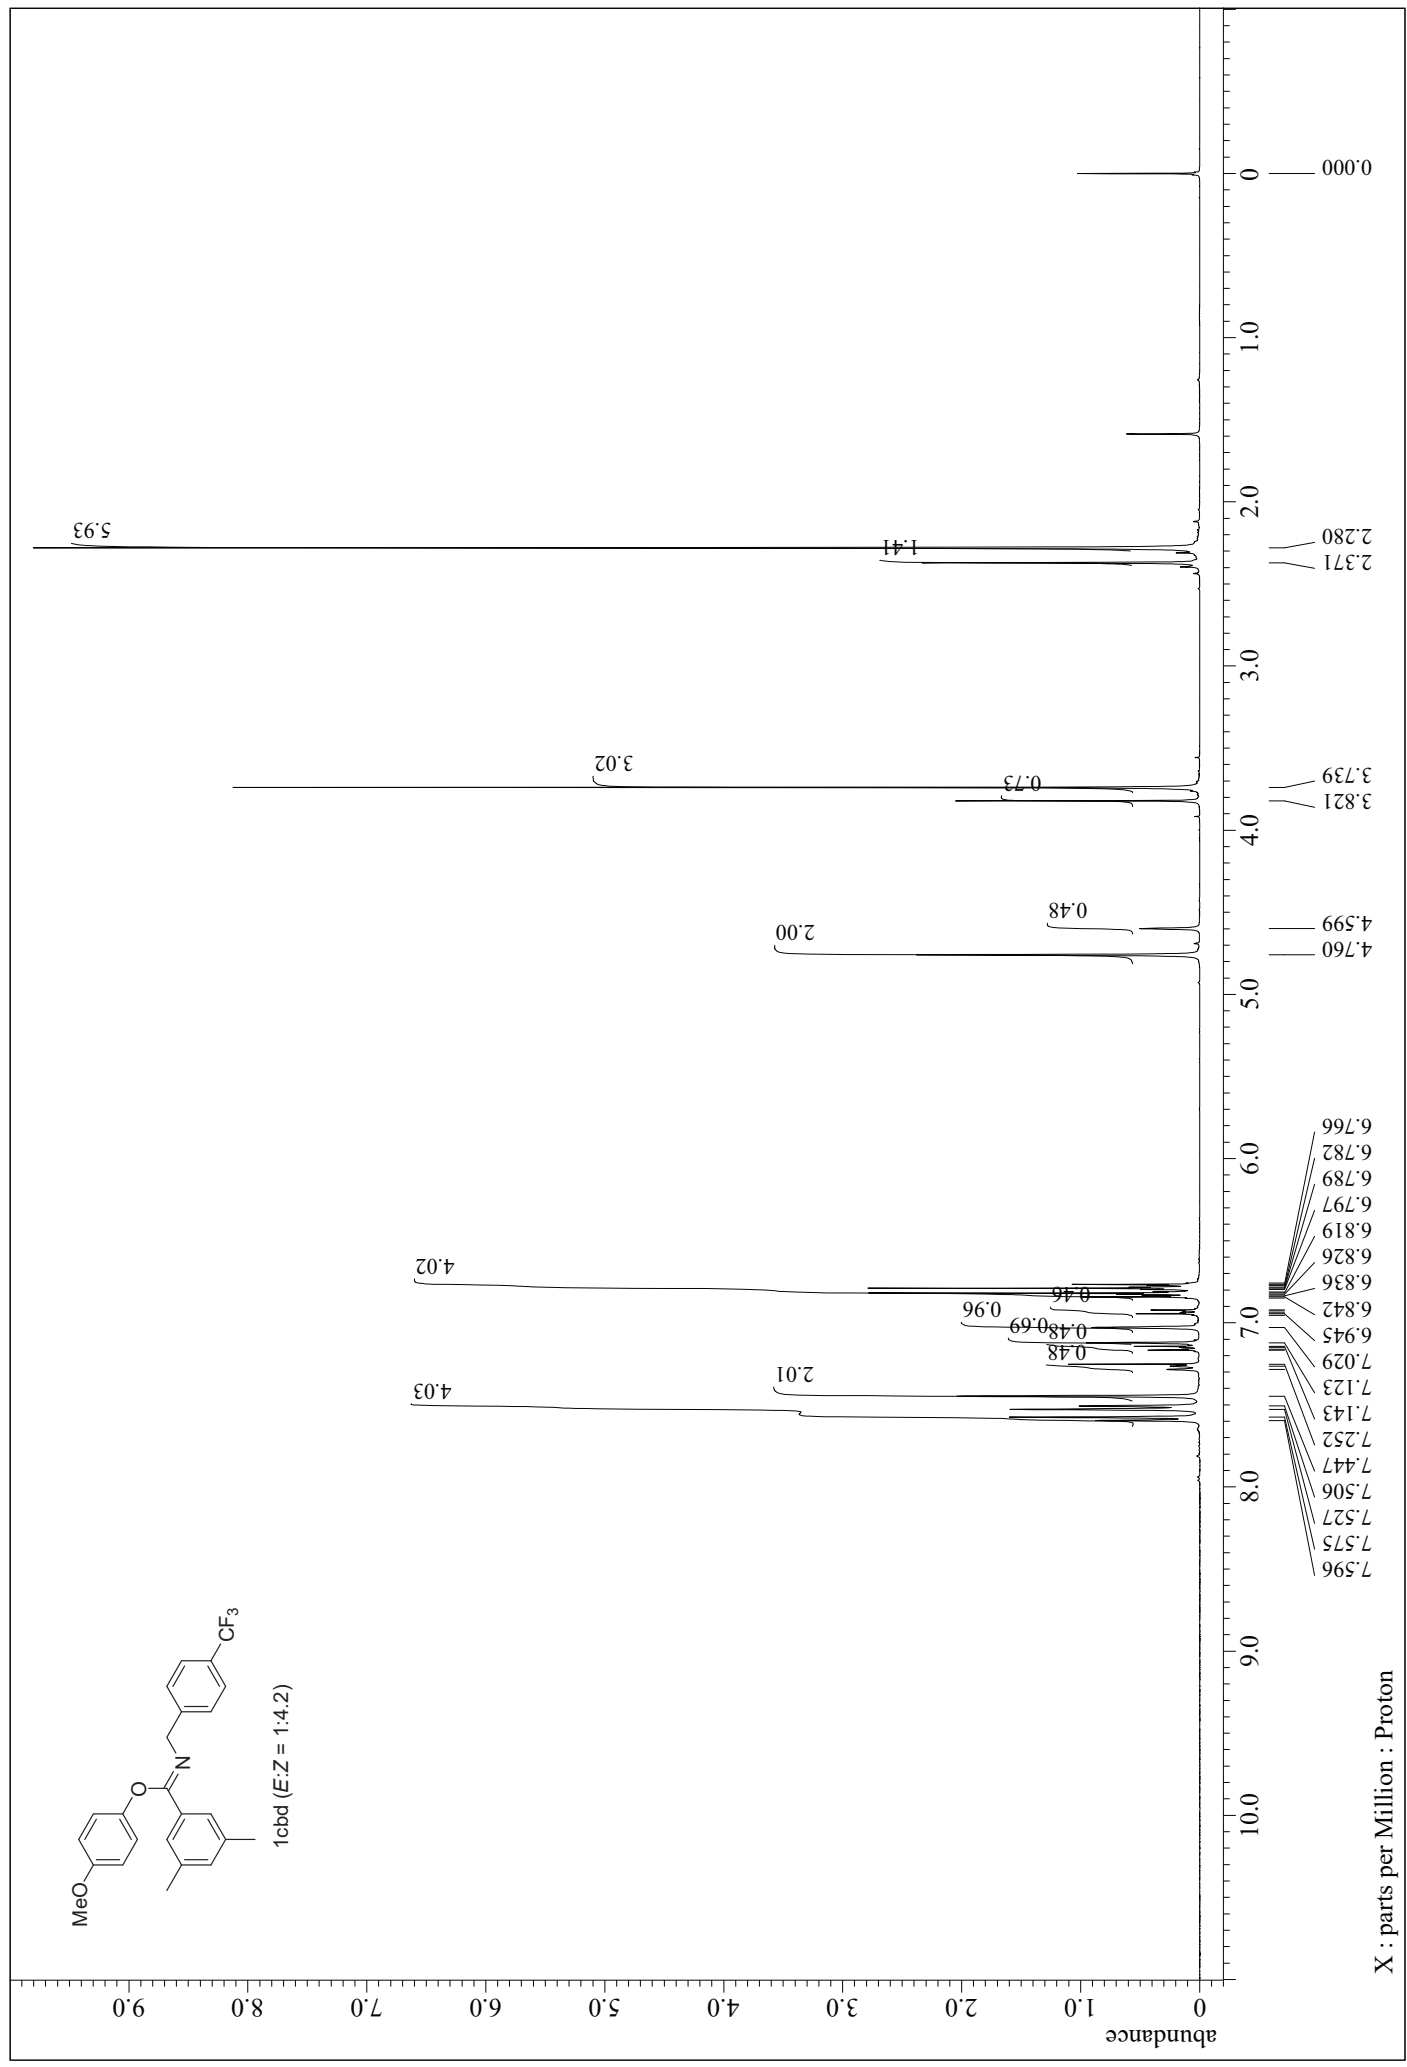

X : parts per Million : Proton

<sup>13</sup>C NMR (101 MHz, CDCl<sub>3</sub>)

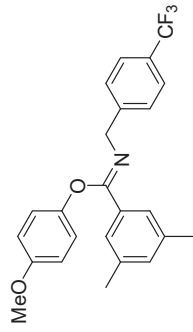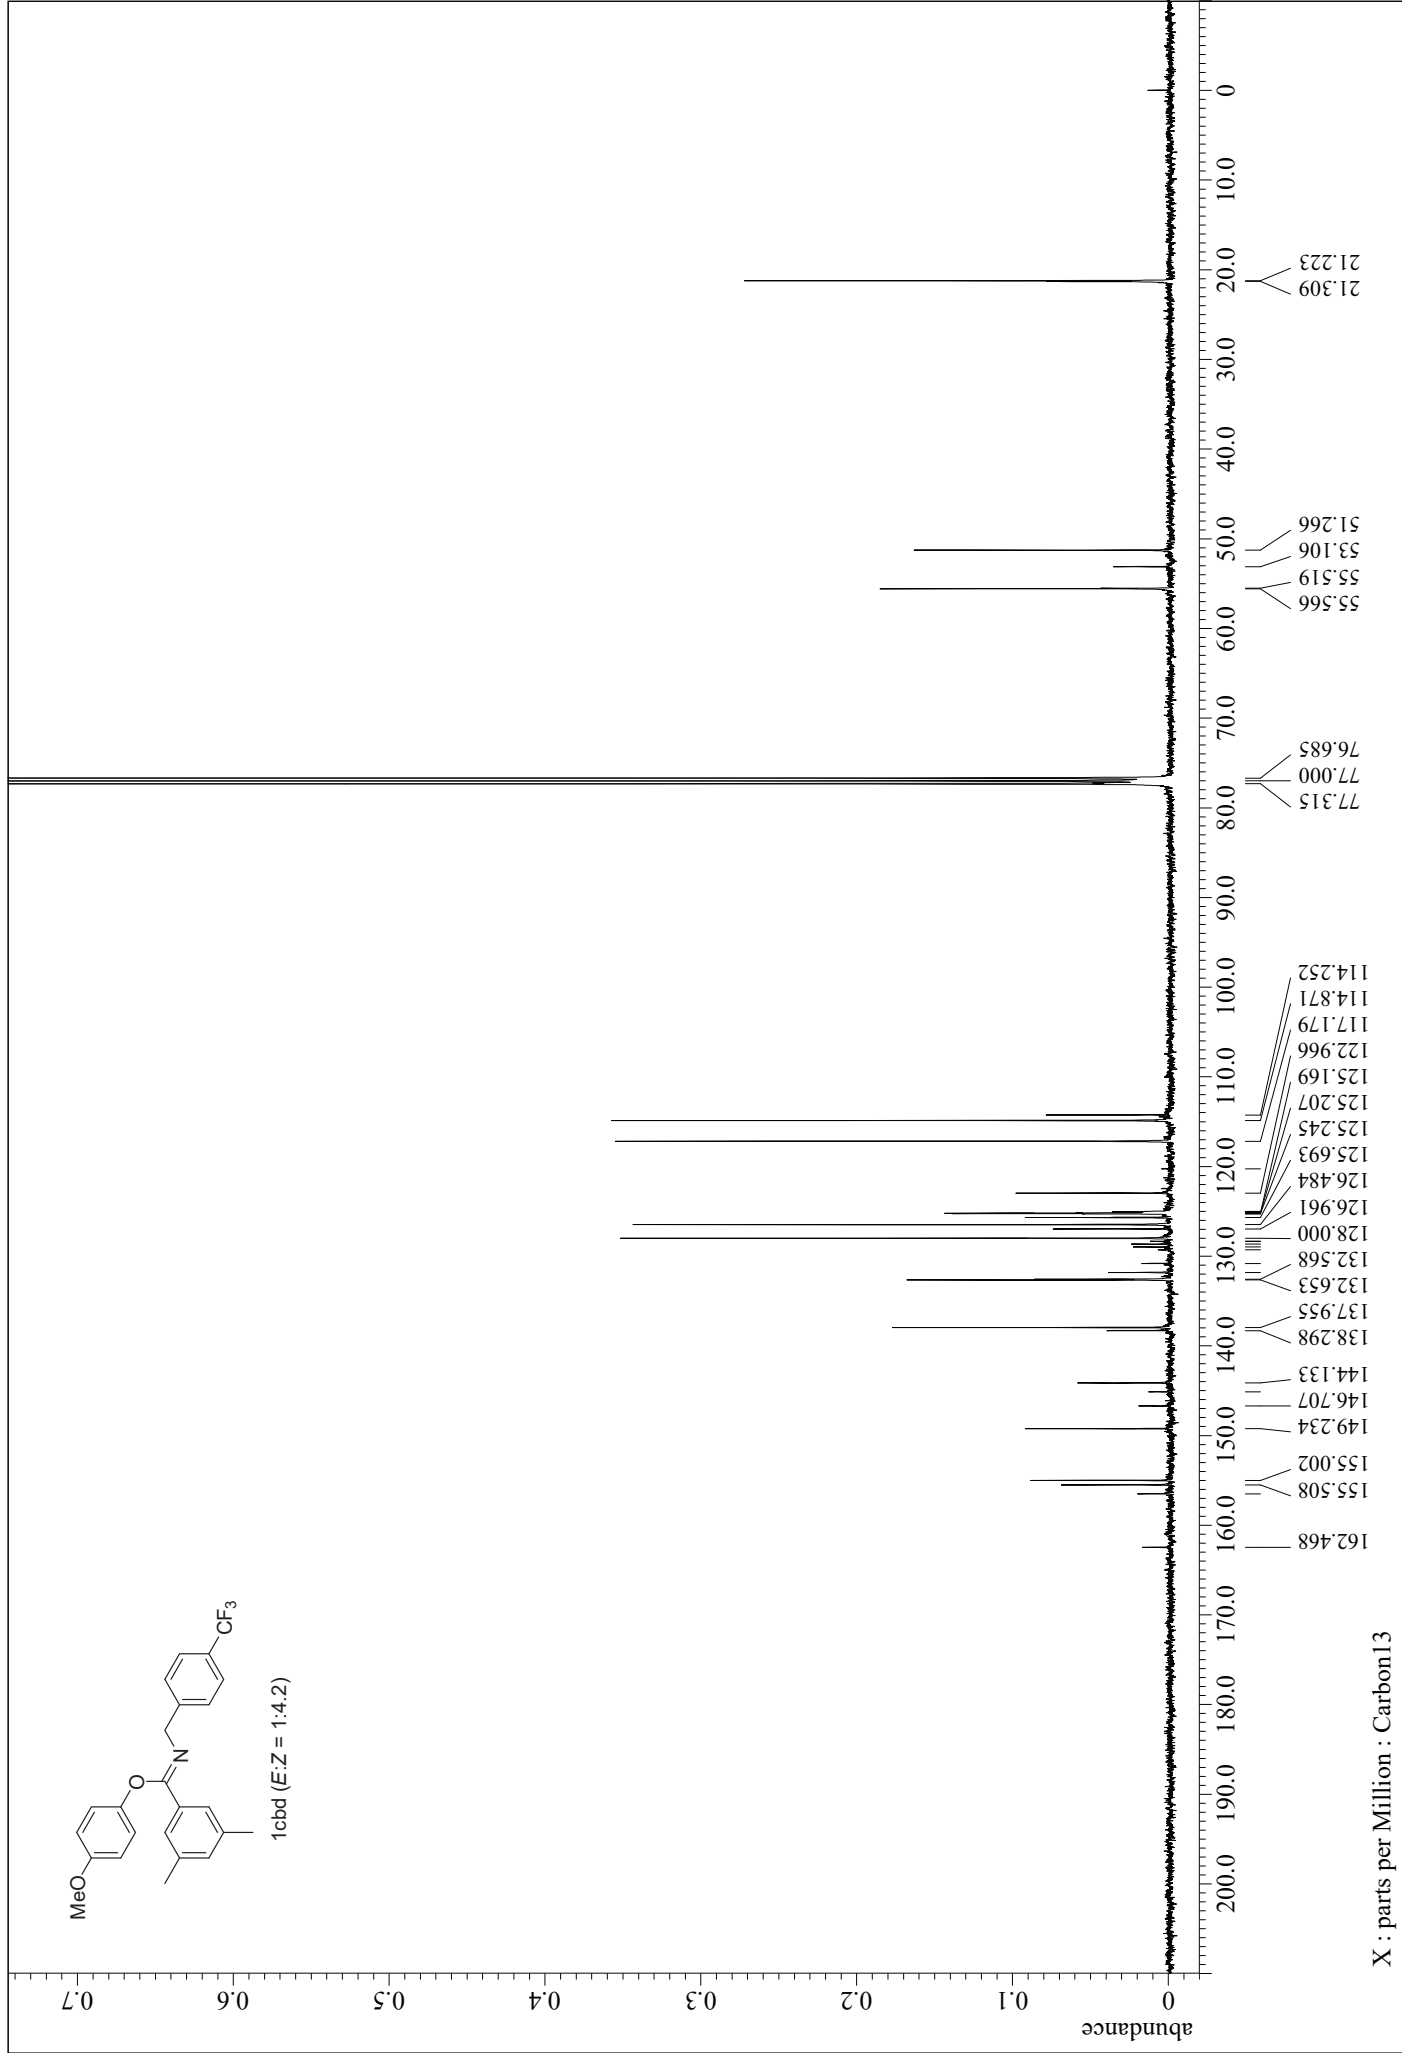

<sup>19</sup>F NMR (376 MHz, CDCl<sub>3</sub>)

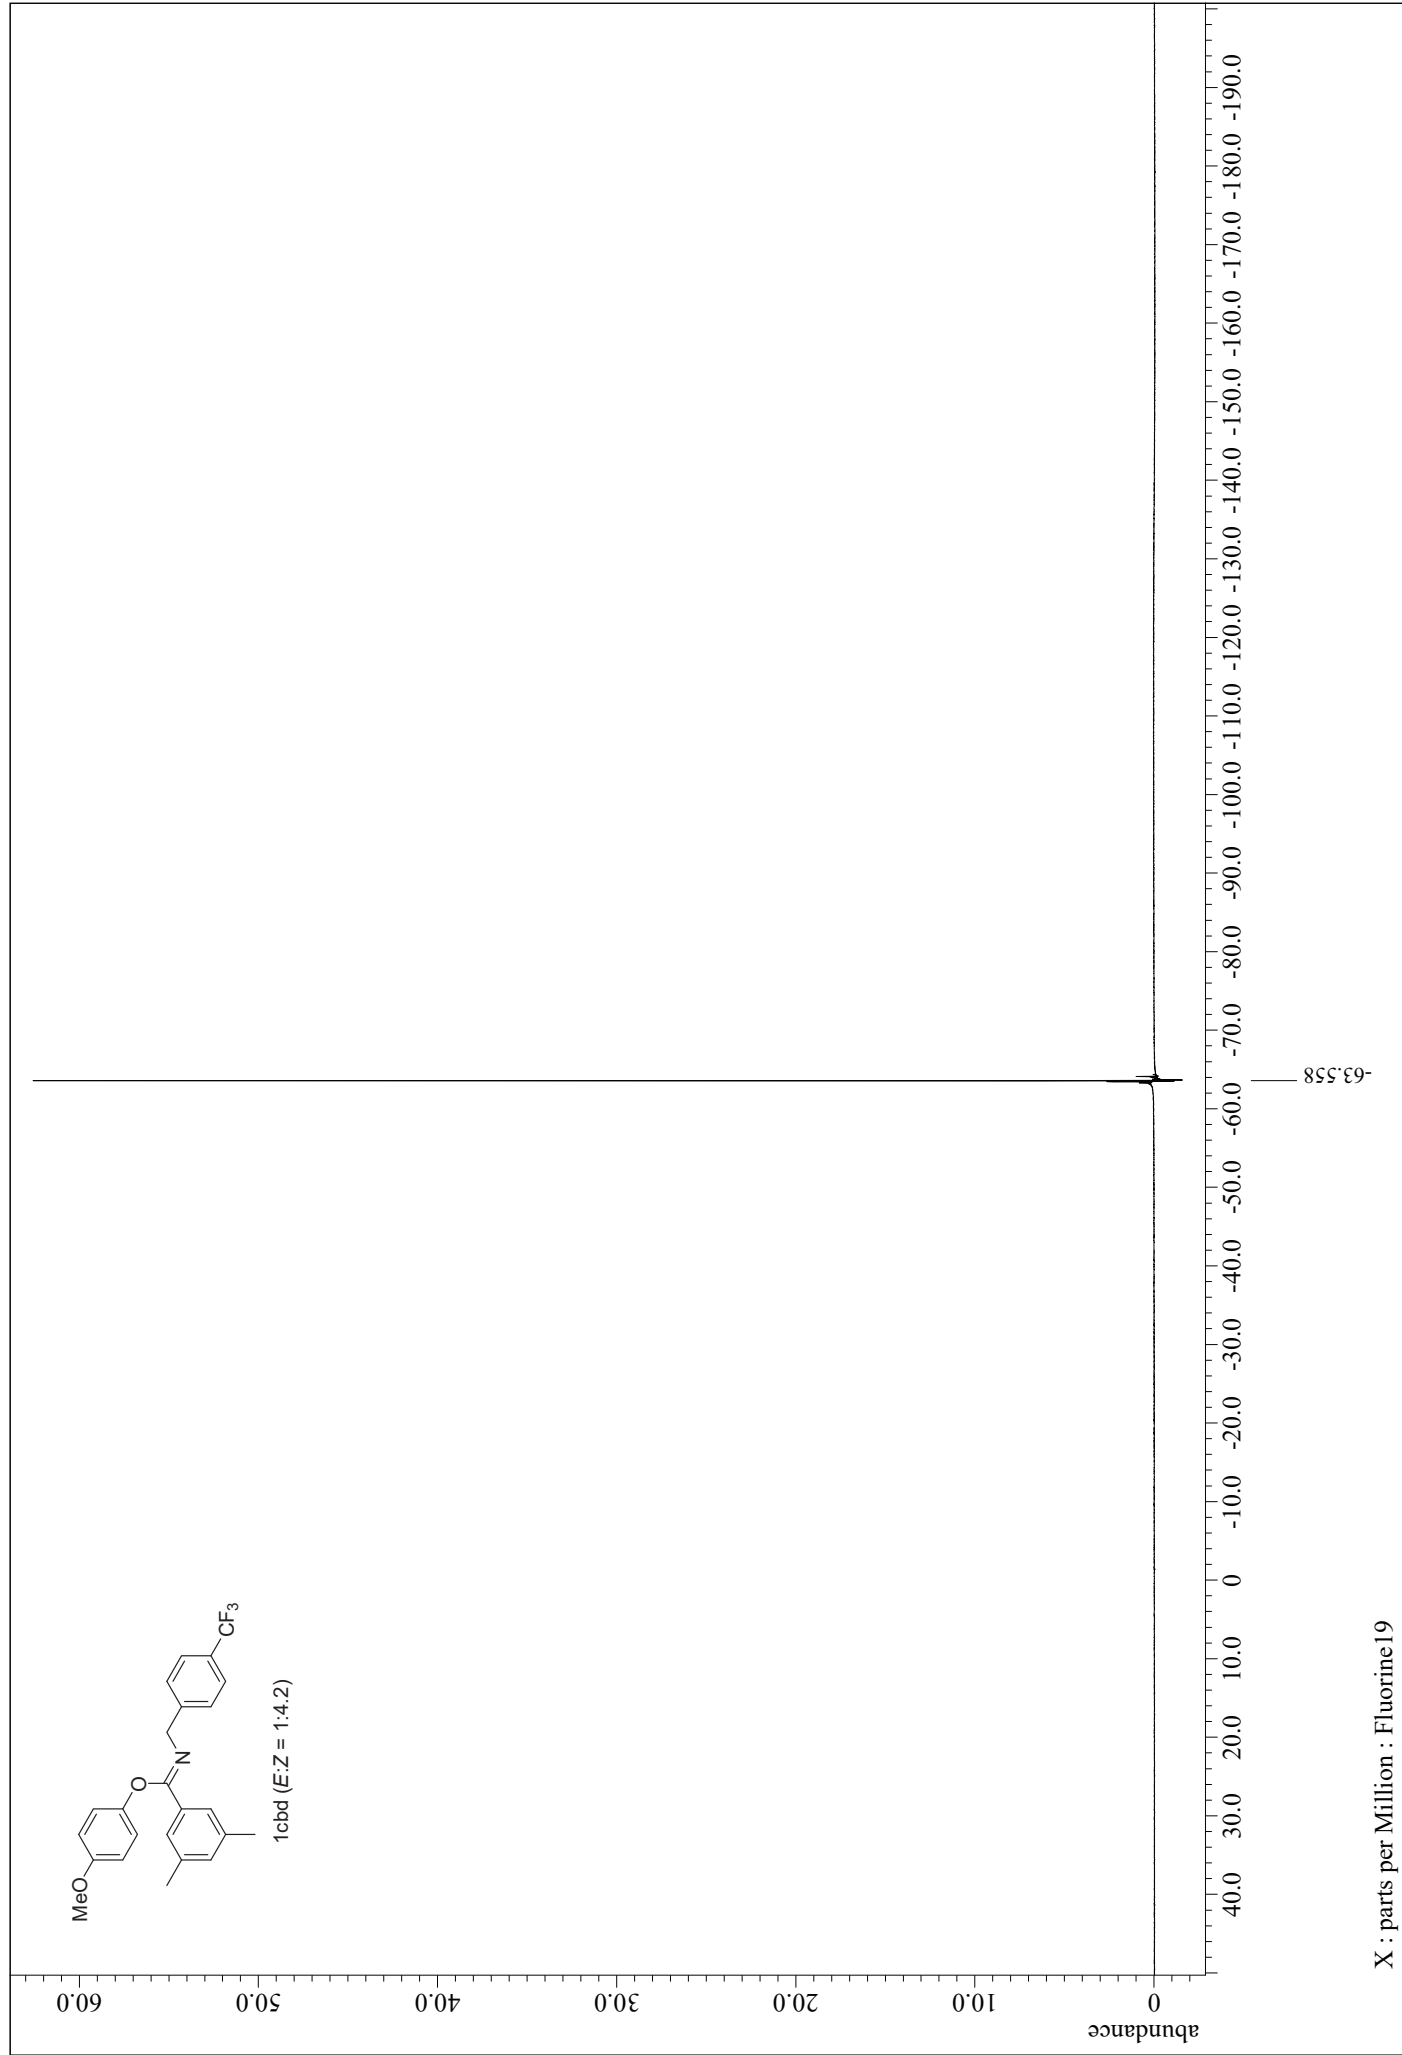

X : parts per Million : Fluorine 19

<sup>1</sup>H NMR (400 MHz, CDCl<sub>3</sub>)

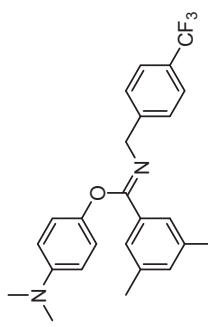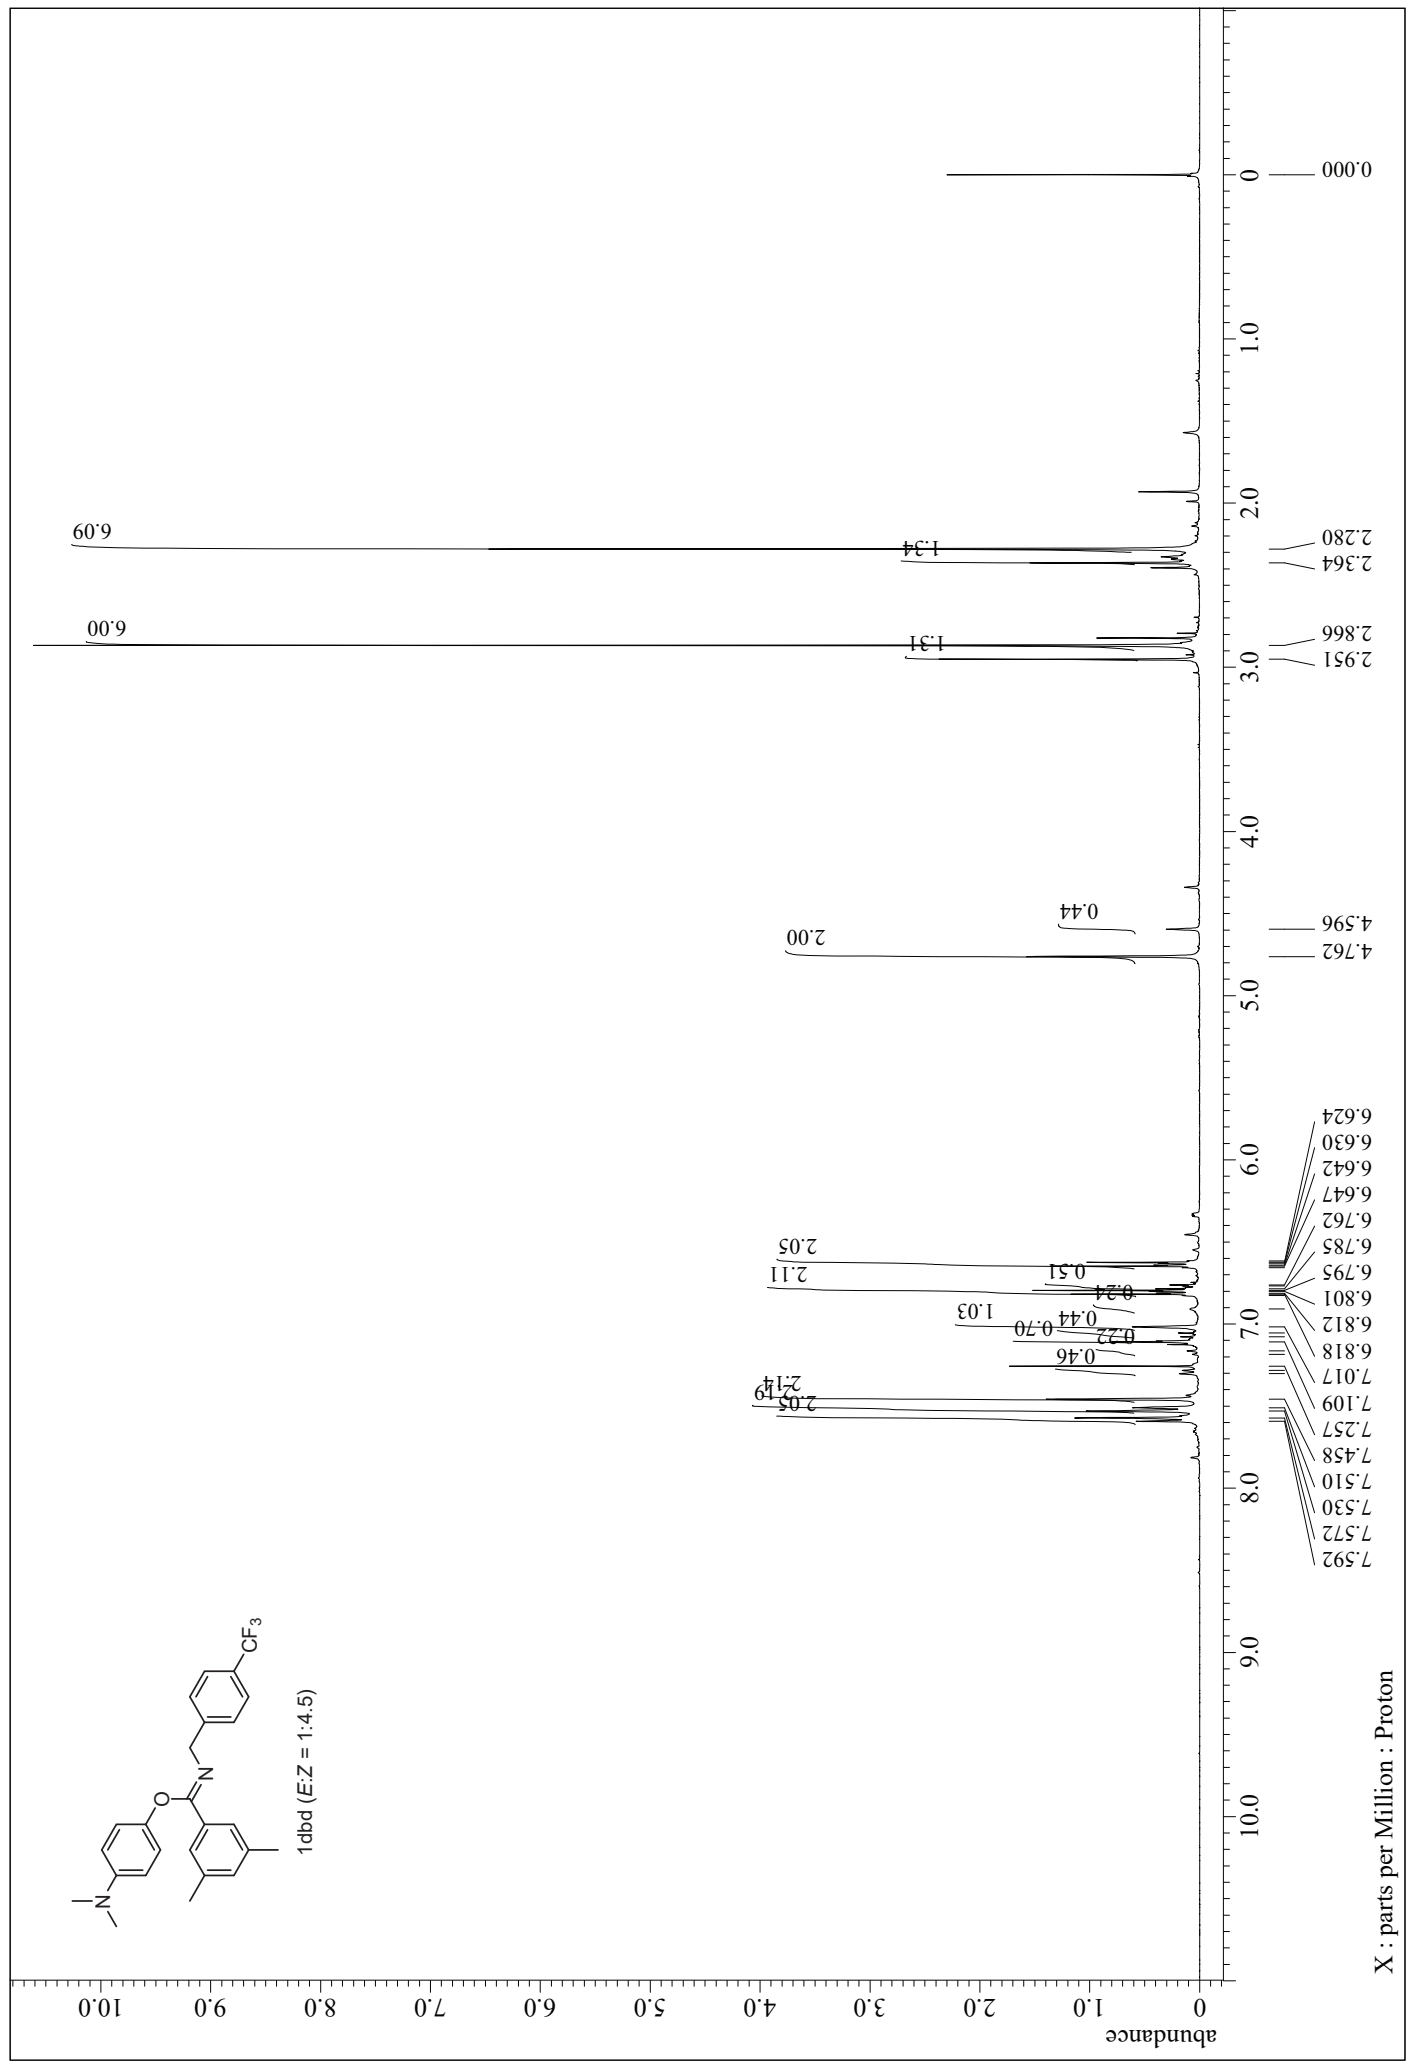

X : parts per Million : Proton

<sup>13</sup>C NMR (101 MHz, CDCl<sub>3</sub>)

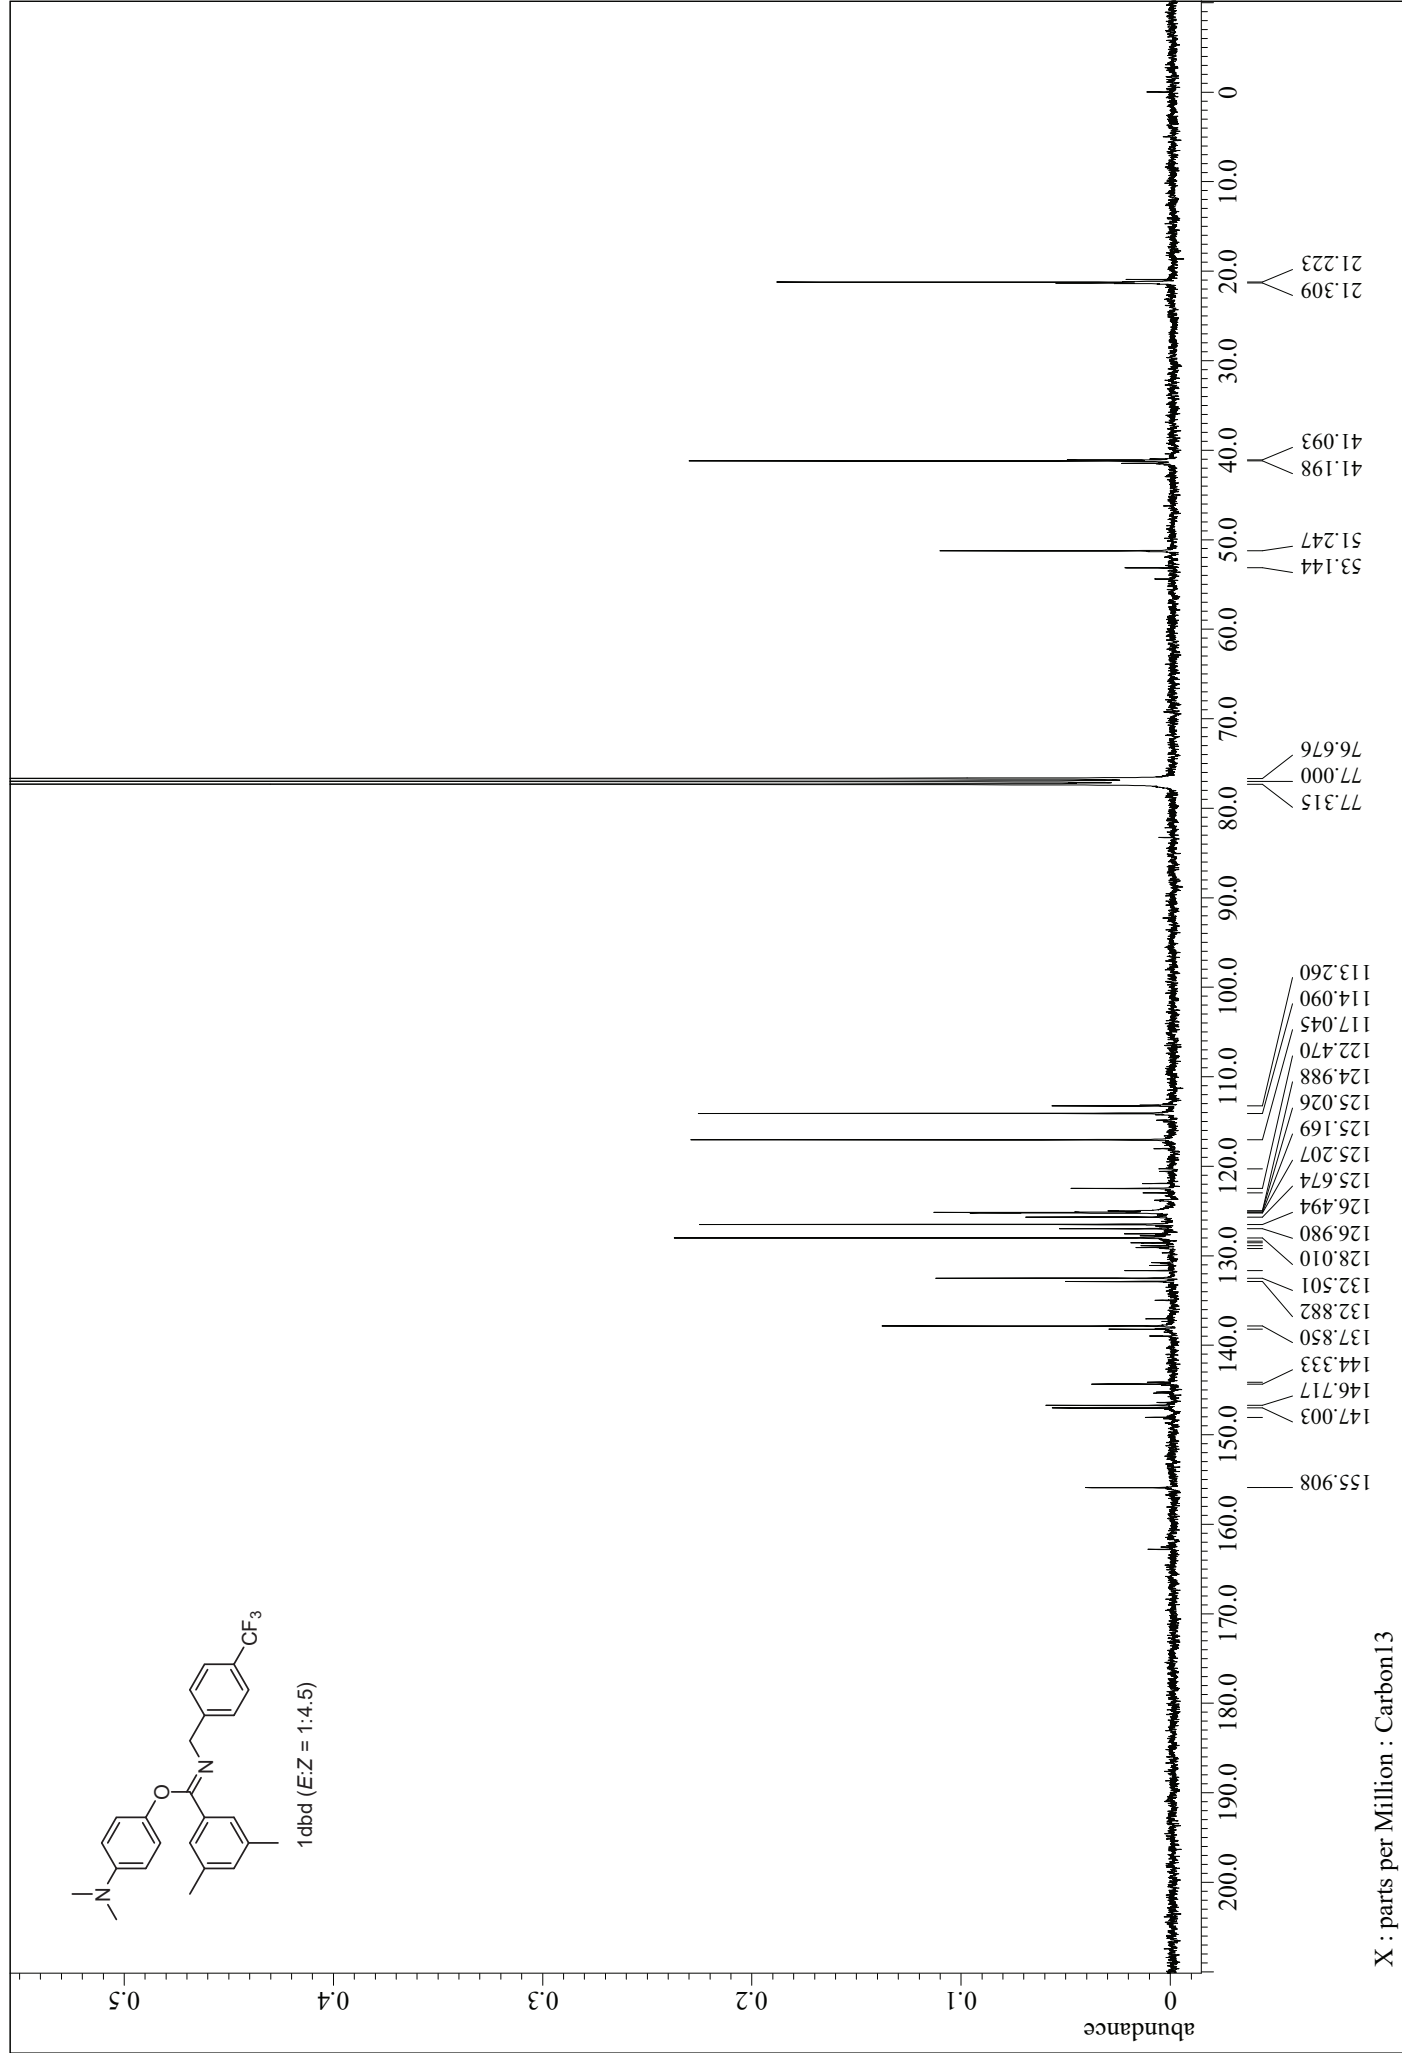

<sup>19</sup>F NMR (376 MHz, CDCl<sub>3</sub>)

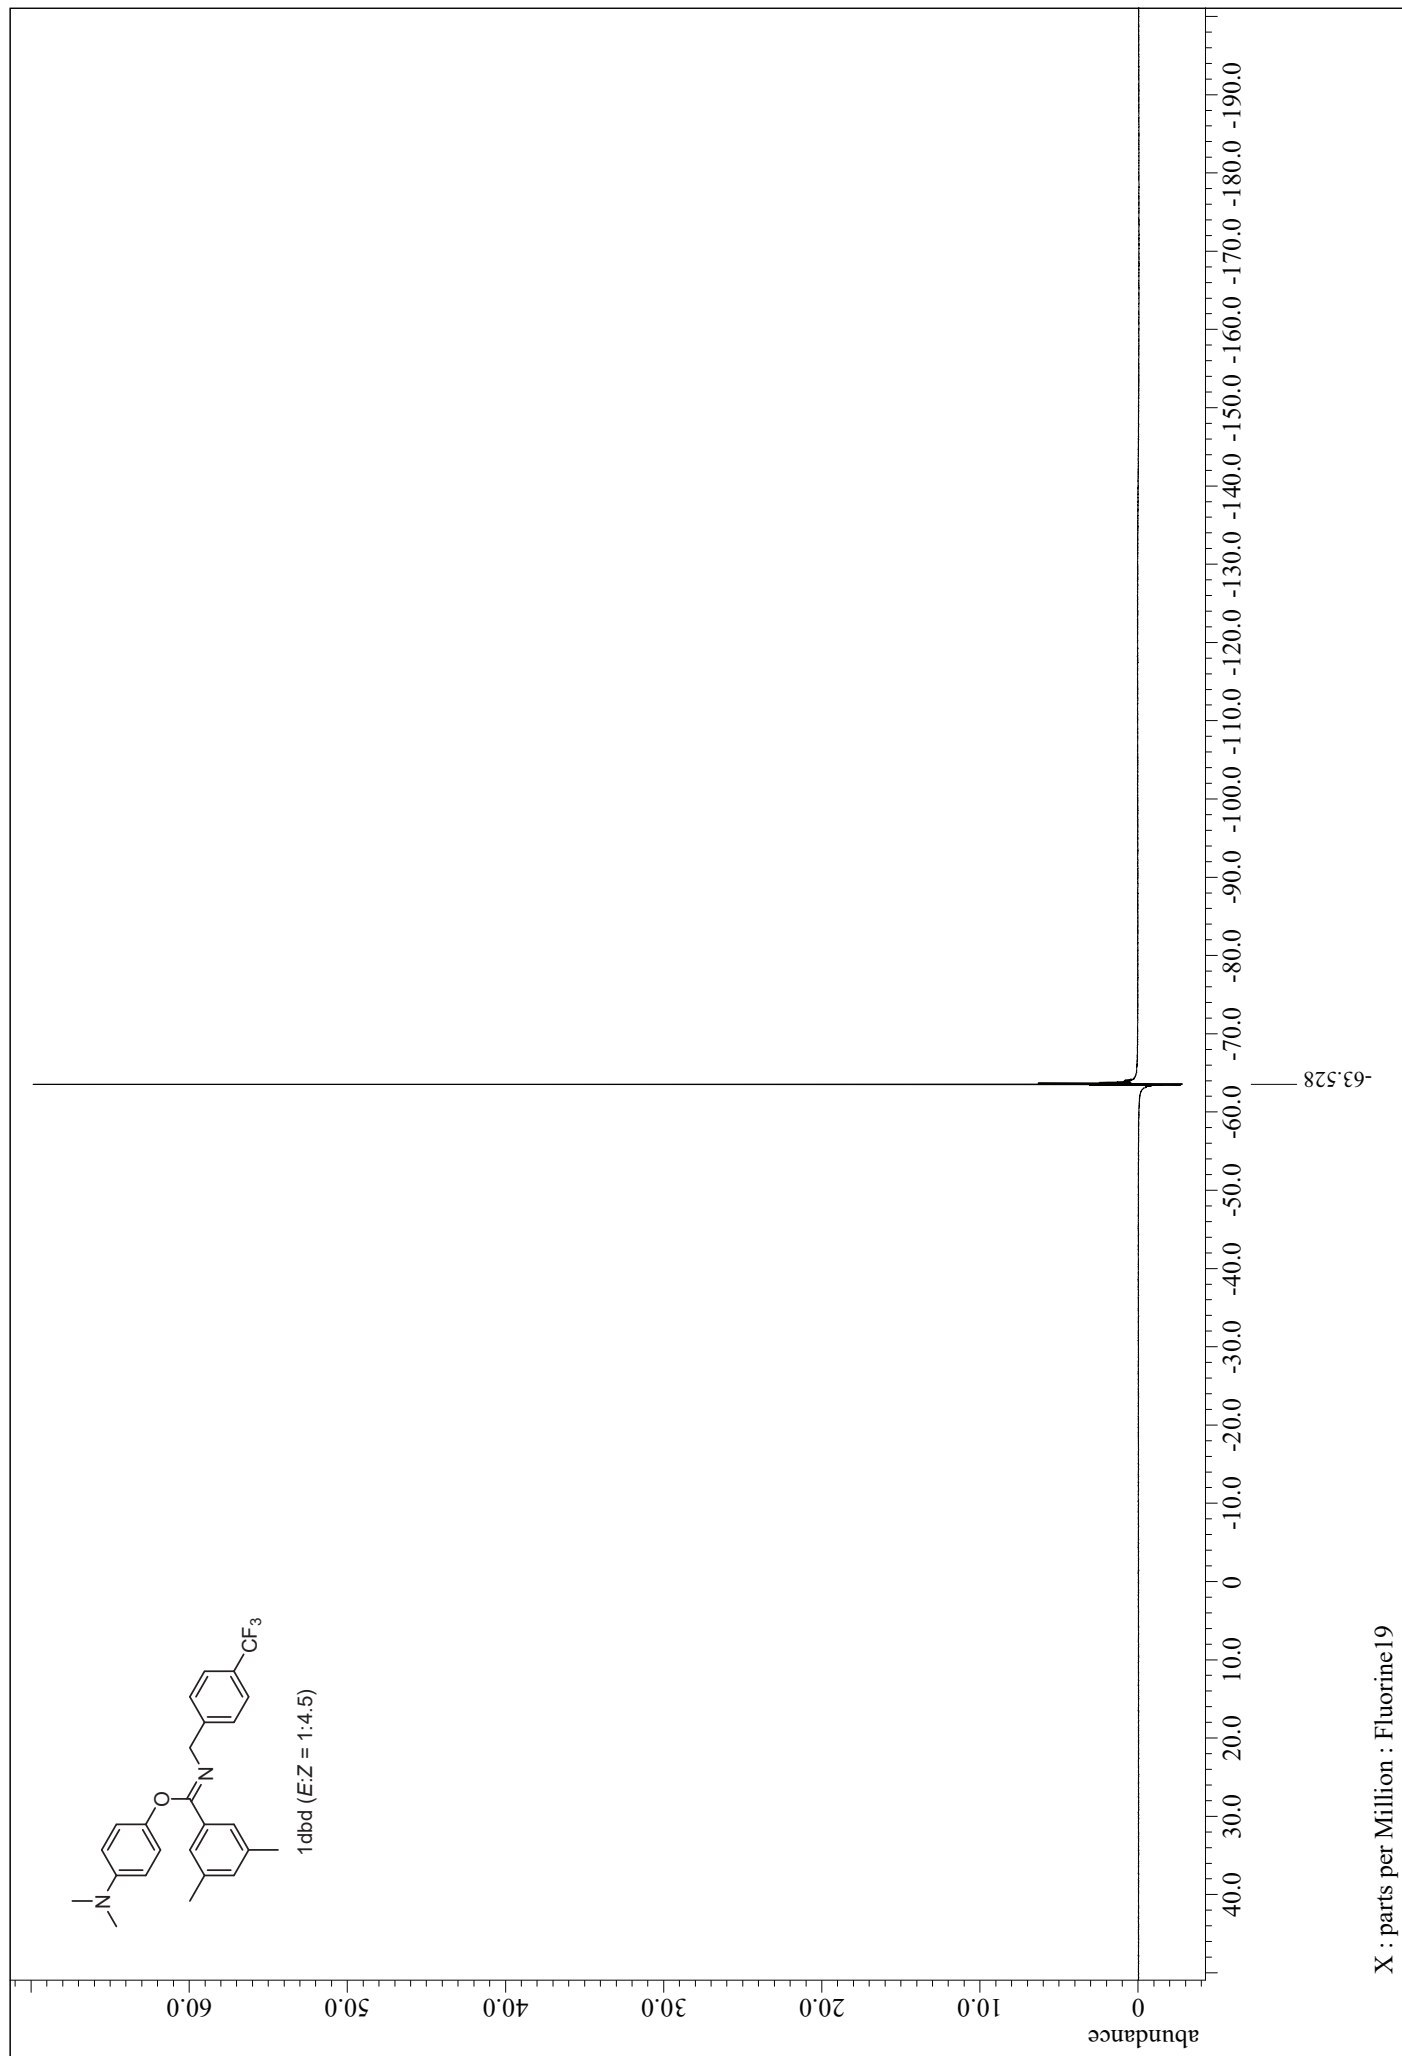

<sup>1</sup>H NMR (400 MHz, CDCl<sub>3</sub>)

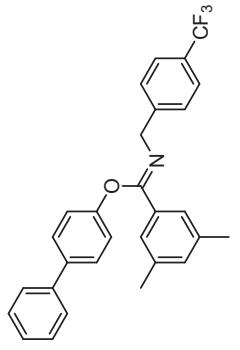

1ebb (E:Z = 1:9.1)

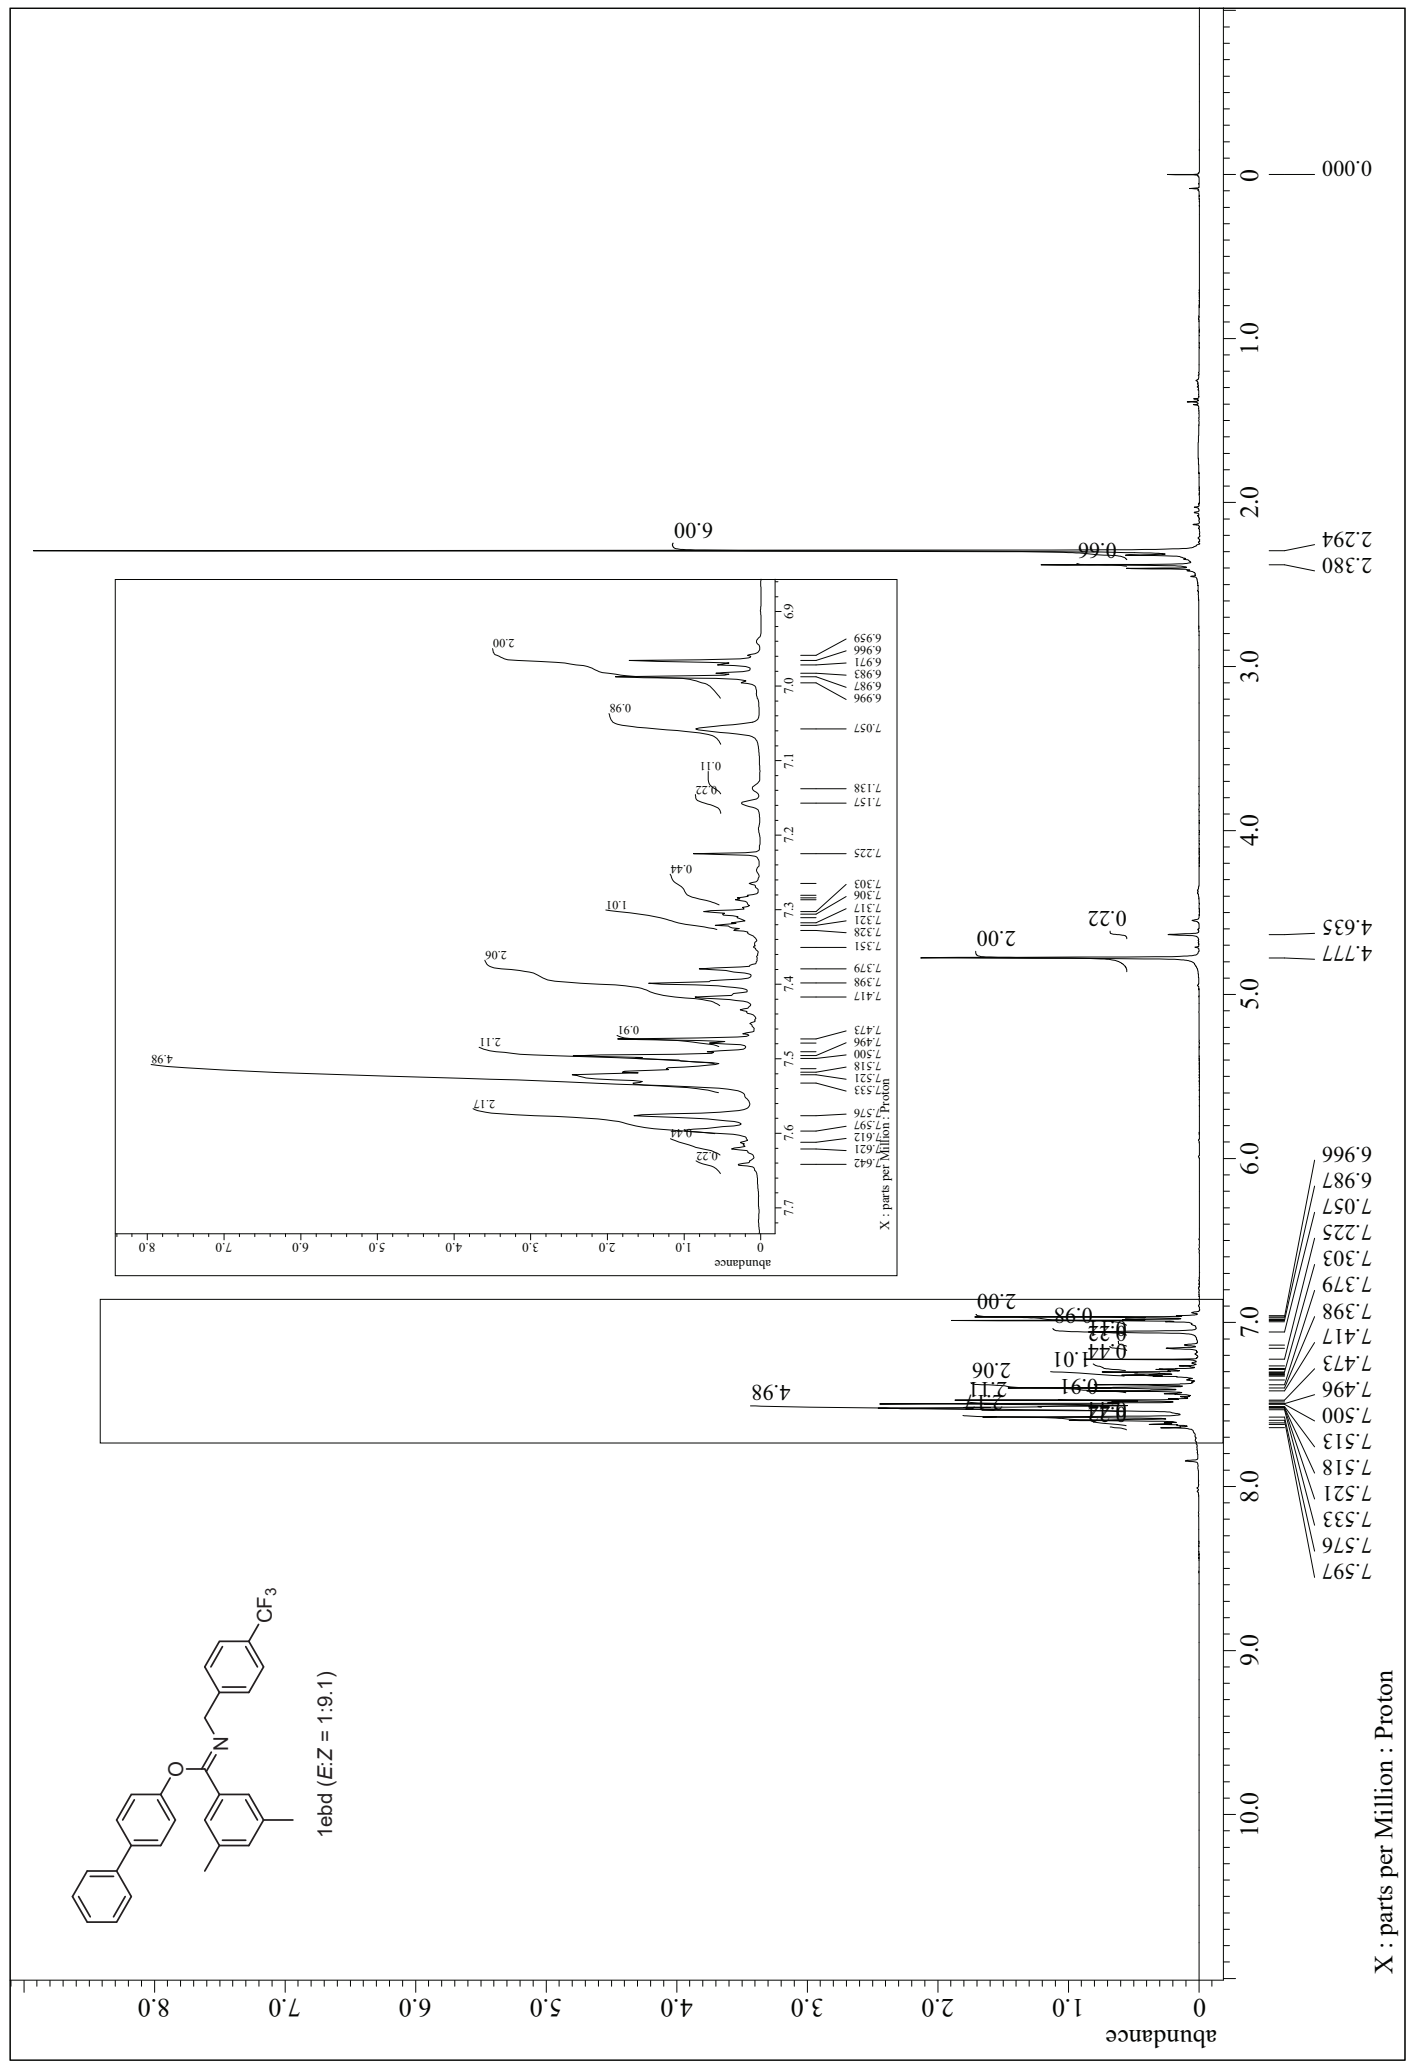

X : parts per Million : Proton

<sup>13</sup>C NMR (101 MHz, CDCl<sub>3</sub>)

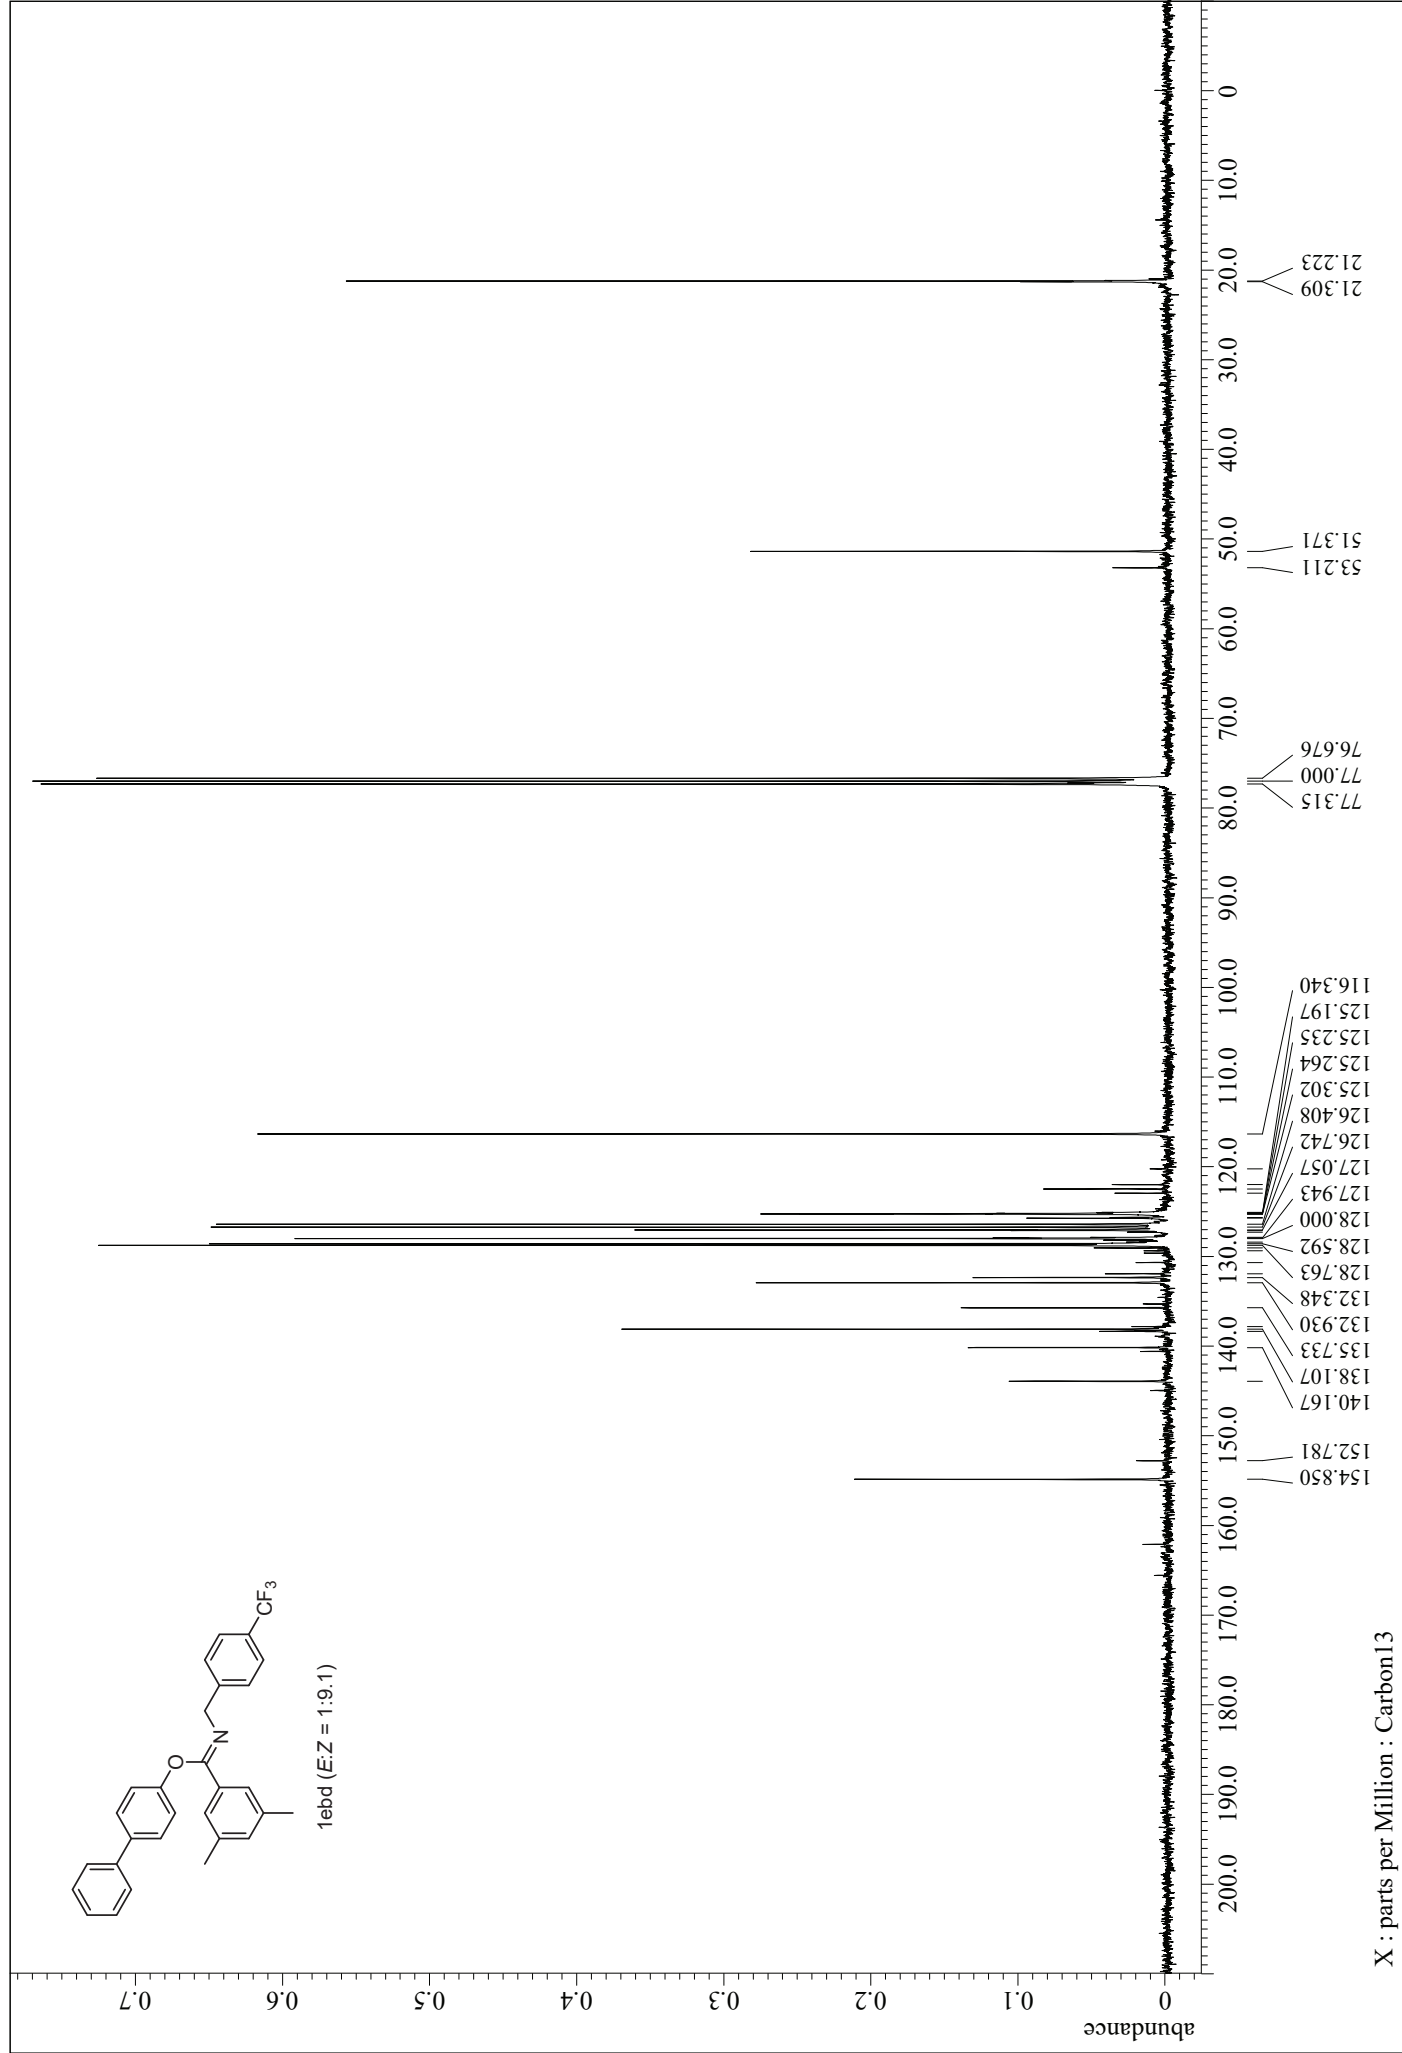



<sup>19</sup>F NMR (376 MHz, CDCl<sub>3</sub>)

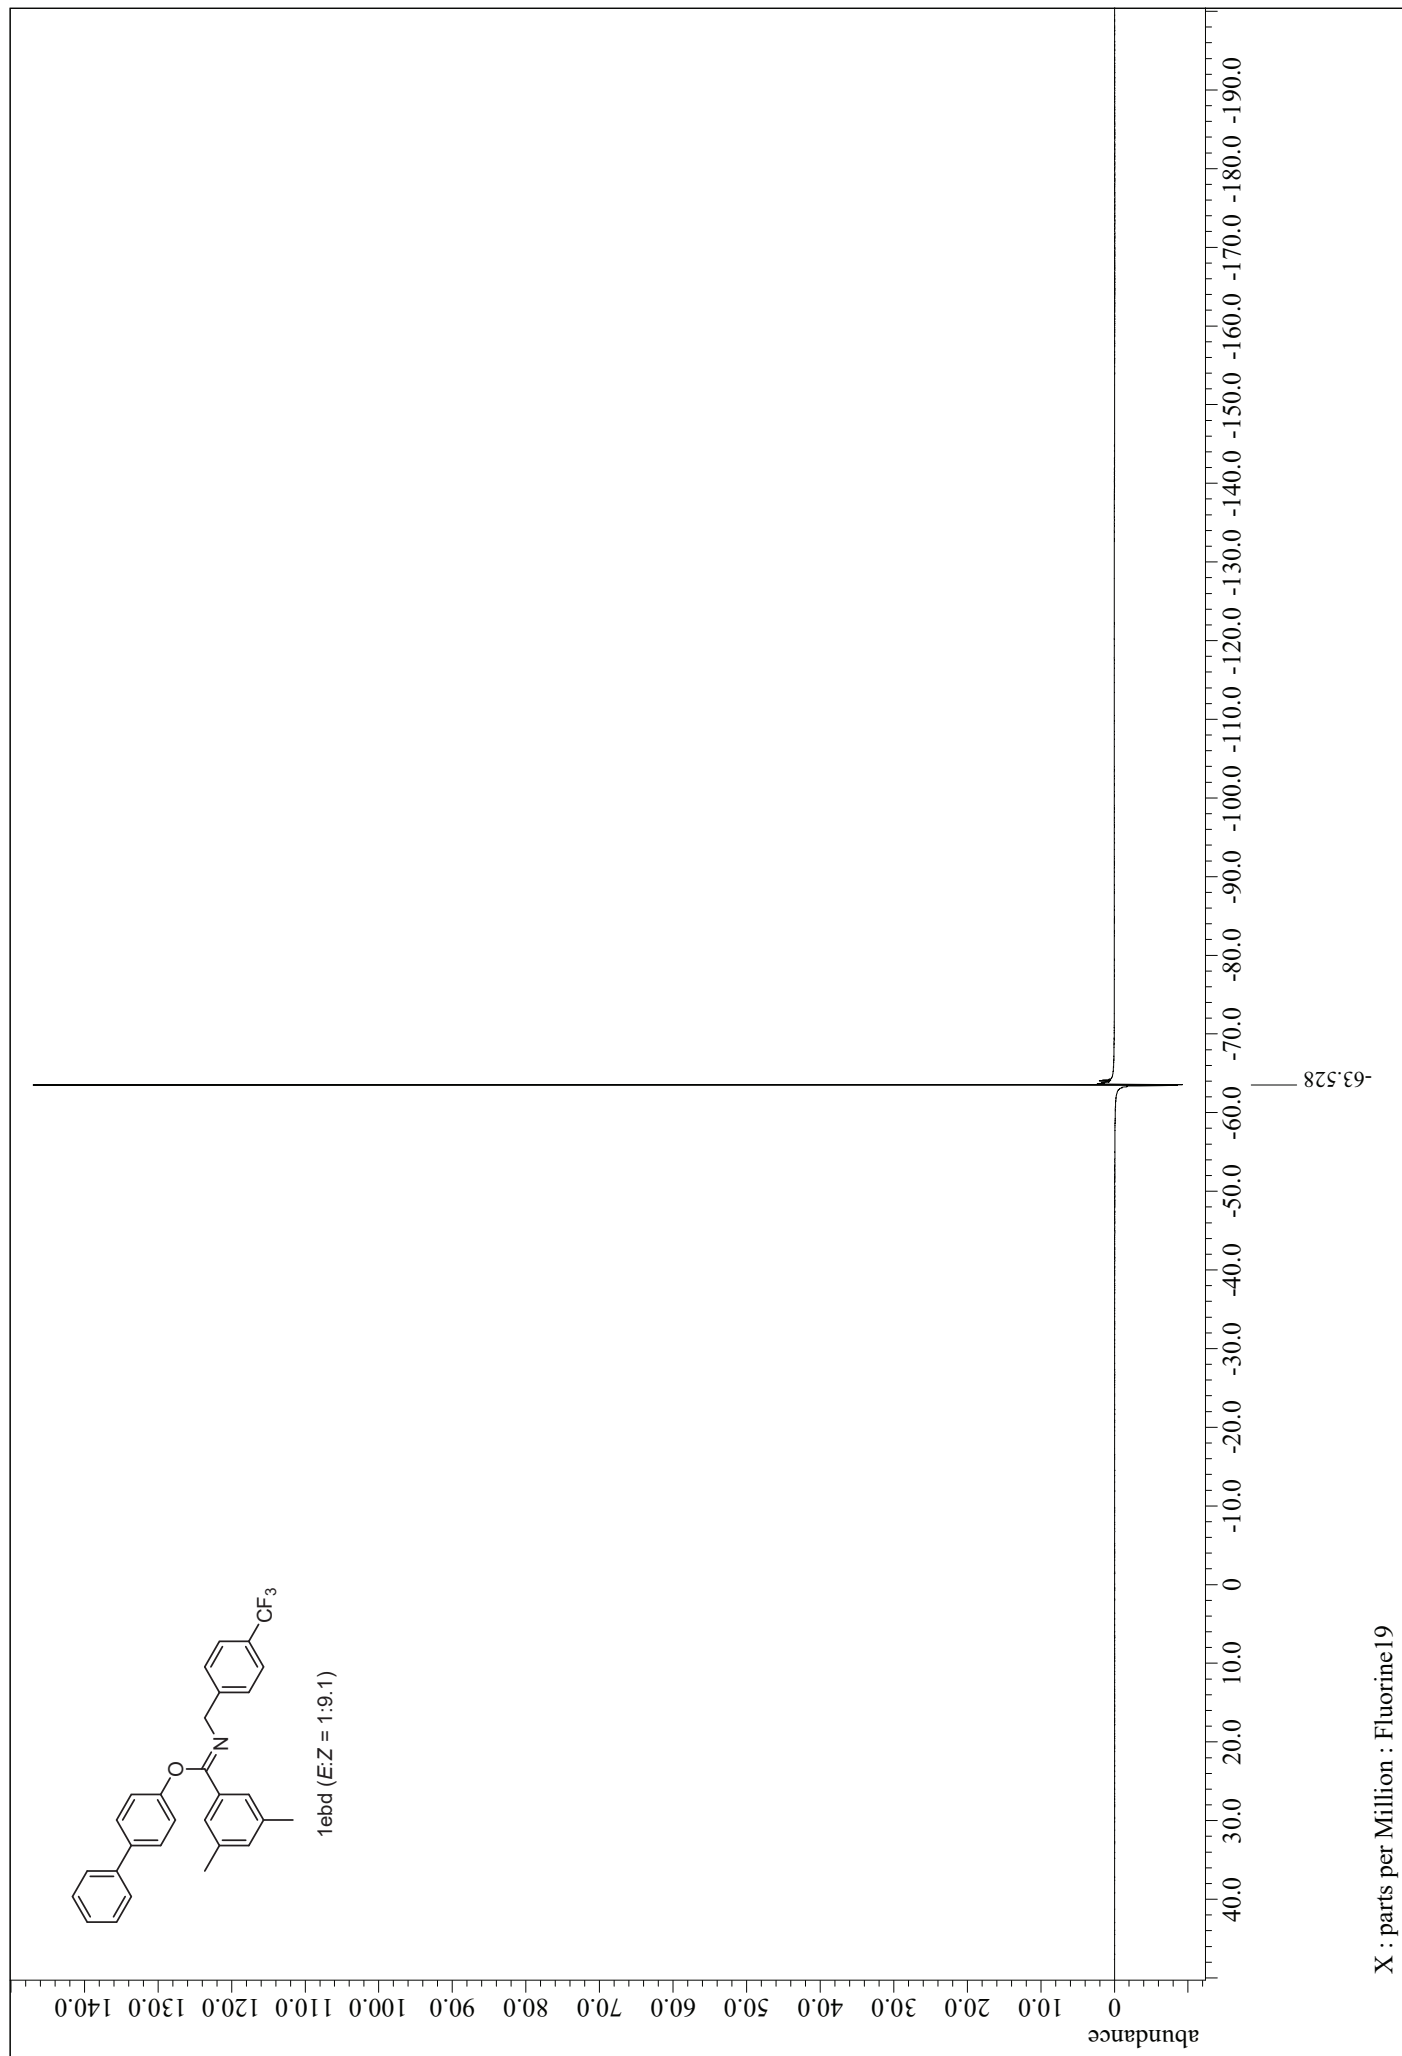

<sup>1</sup>H NMR (400 MHz, CDCl<sub>3</sub>)

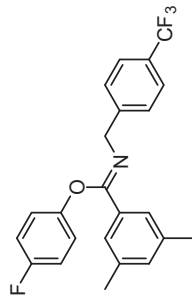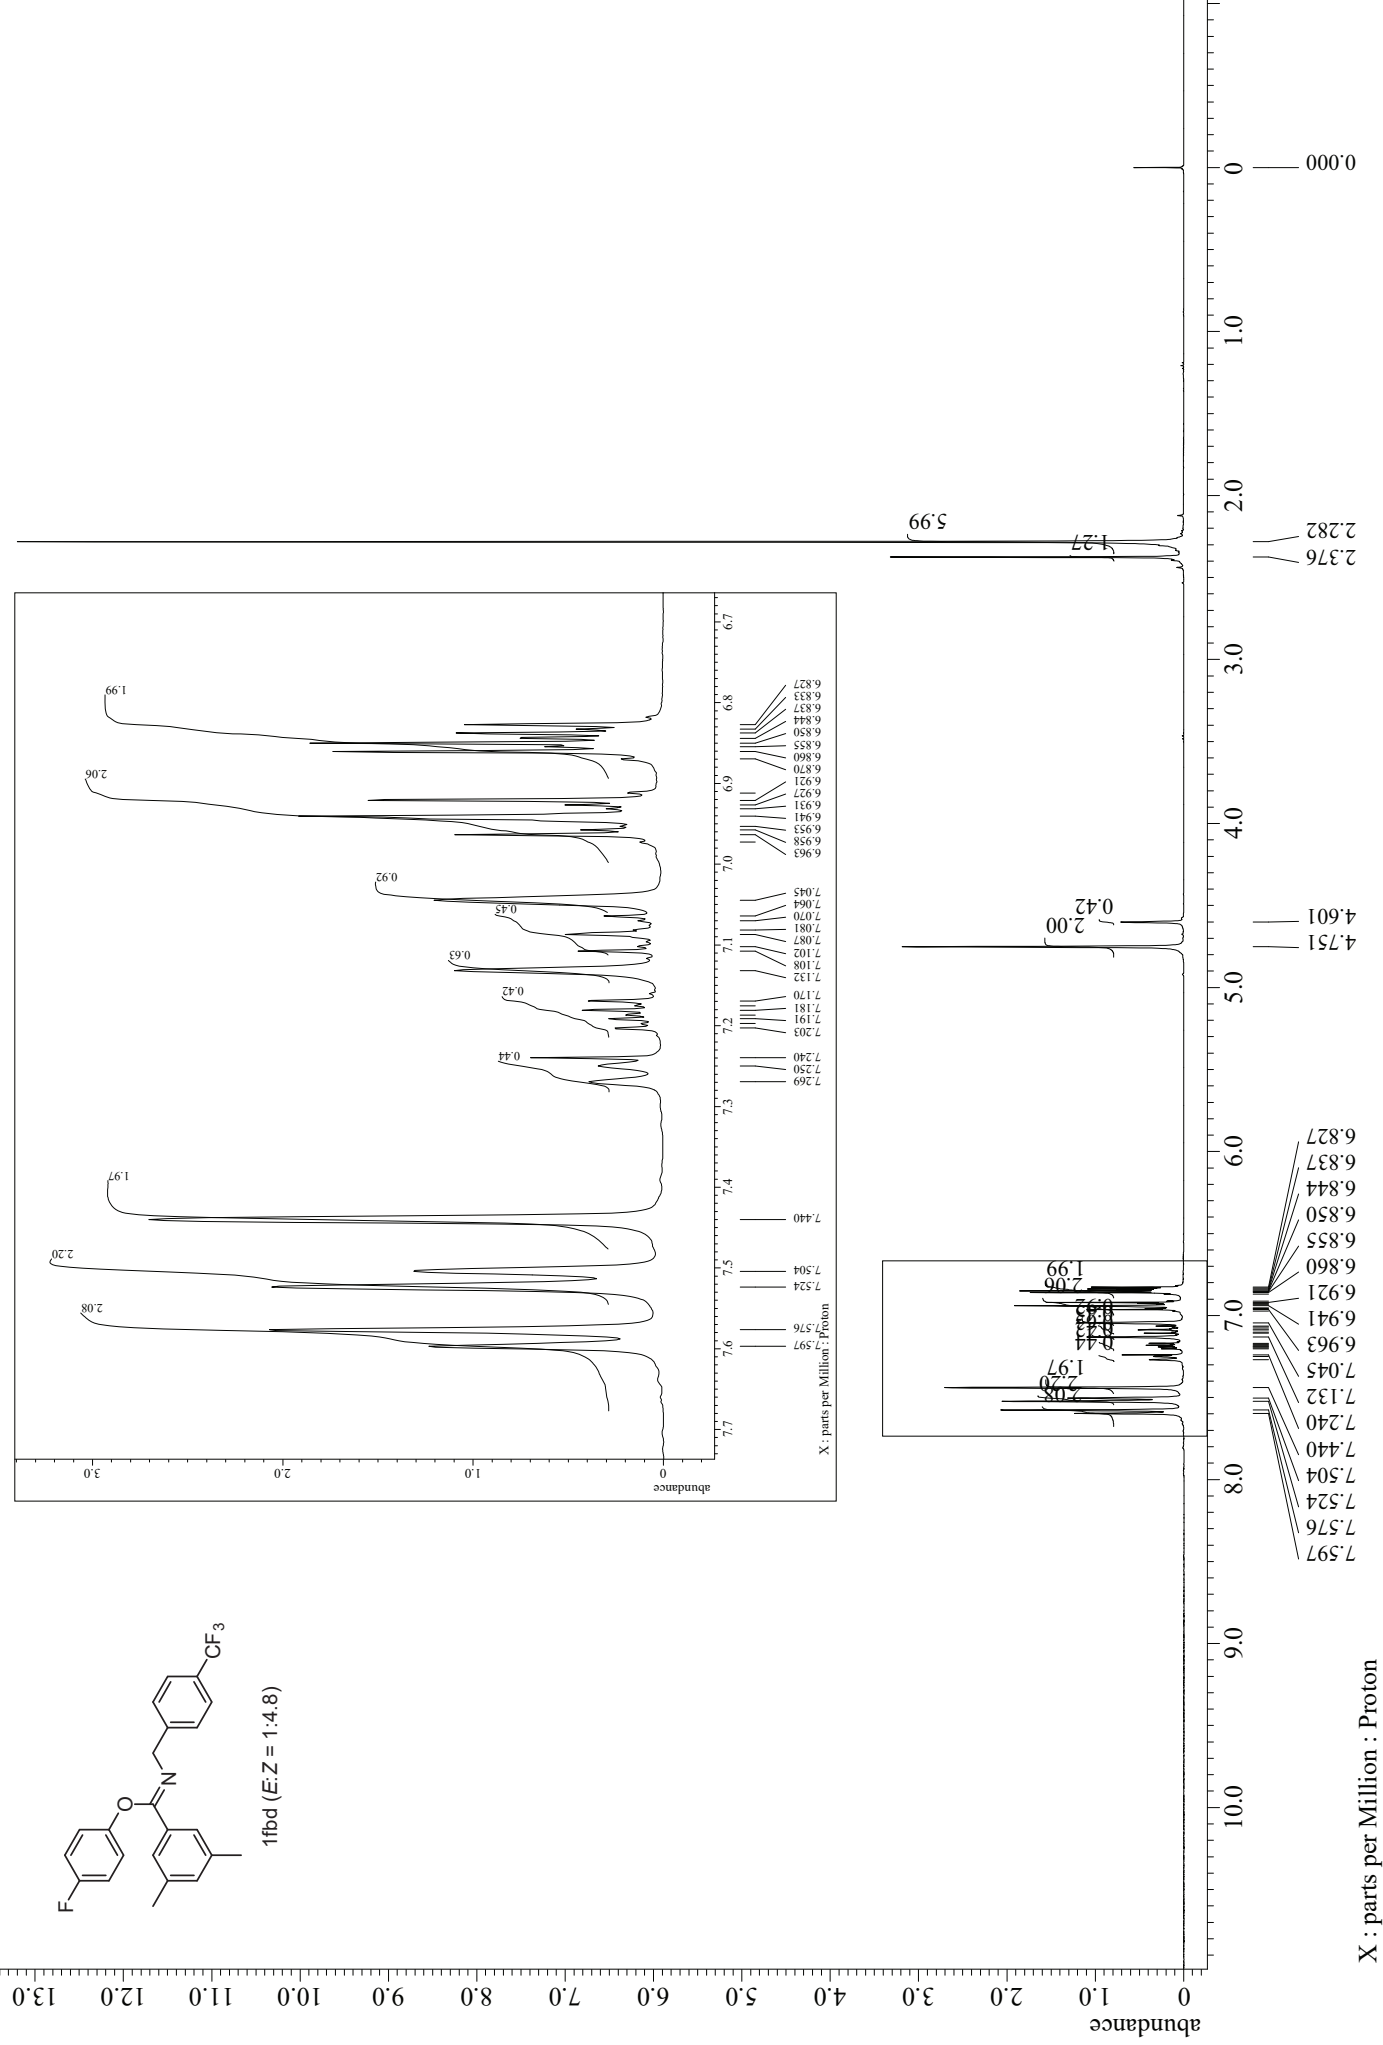

X : parts per Million : Proton

<sup>13</sup>C NMR (101 MHz, CDCl<sub>3</sub>)

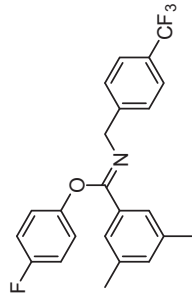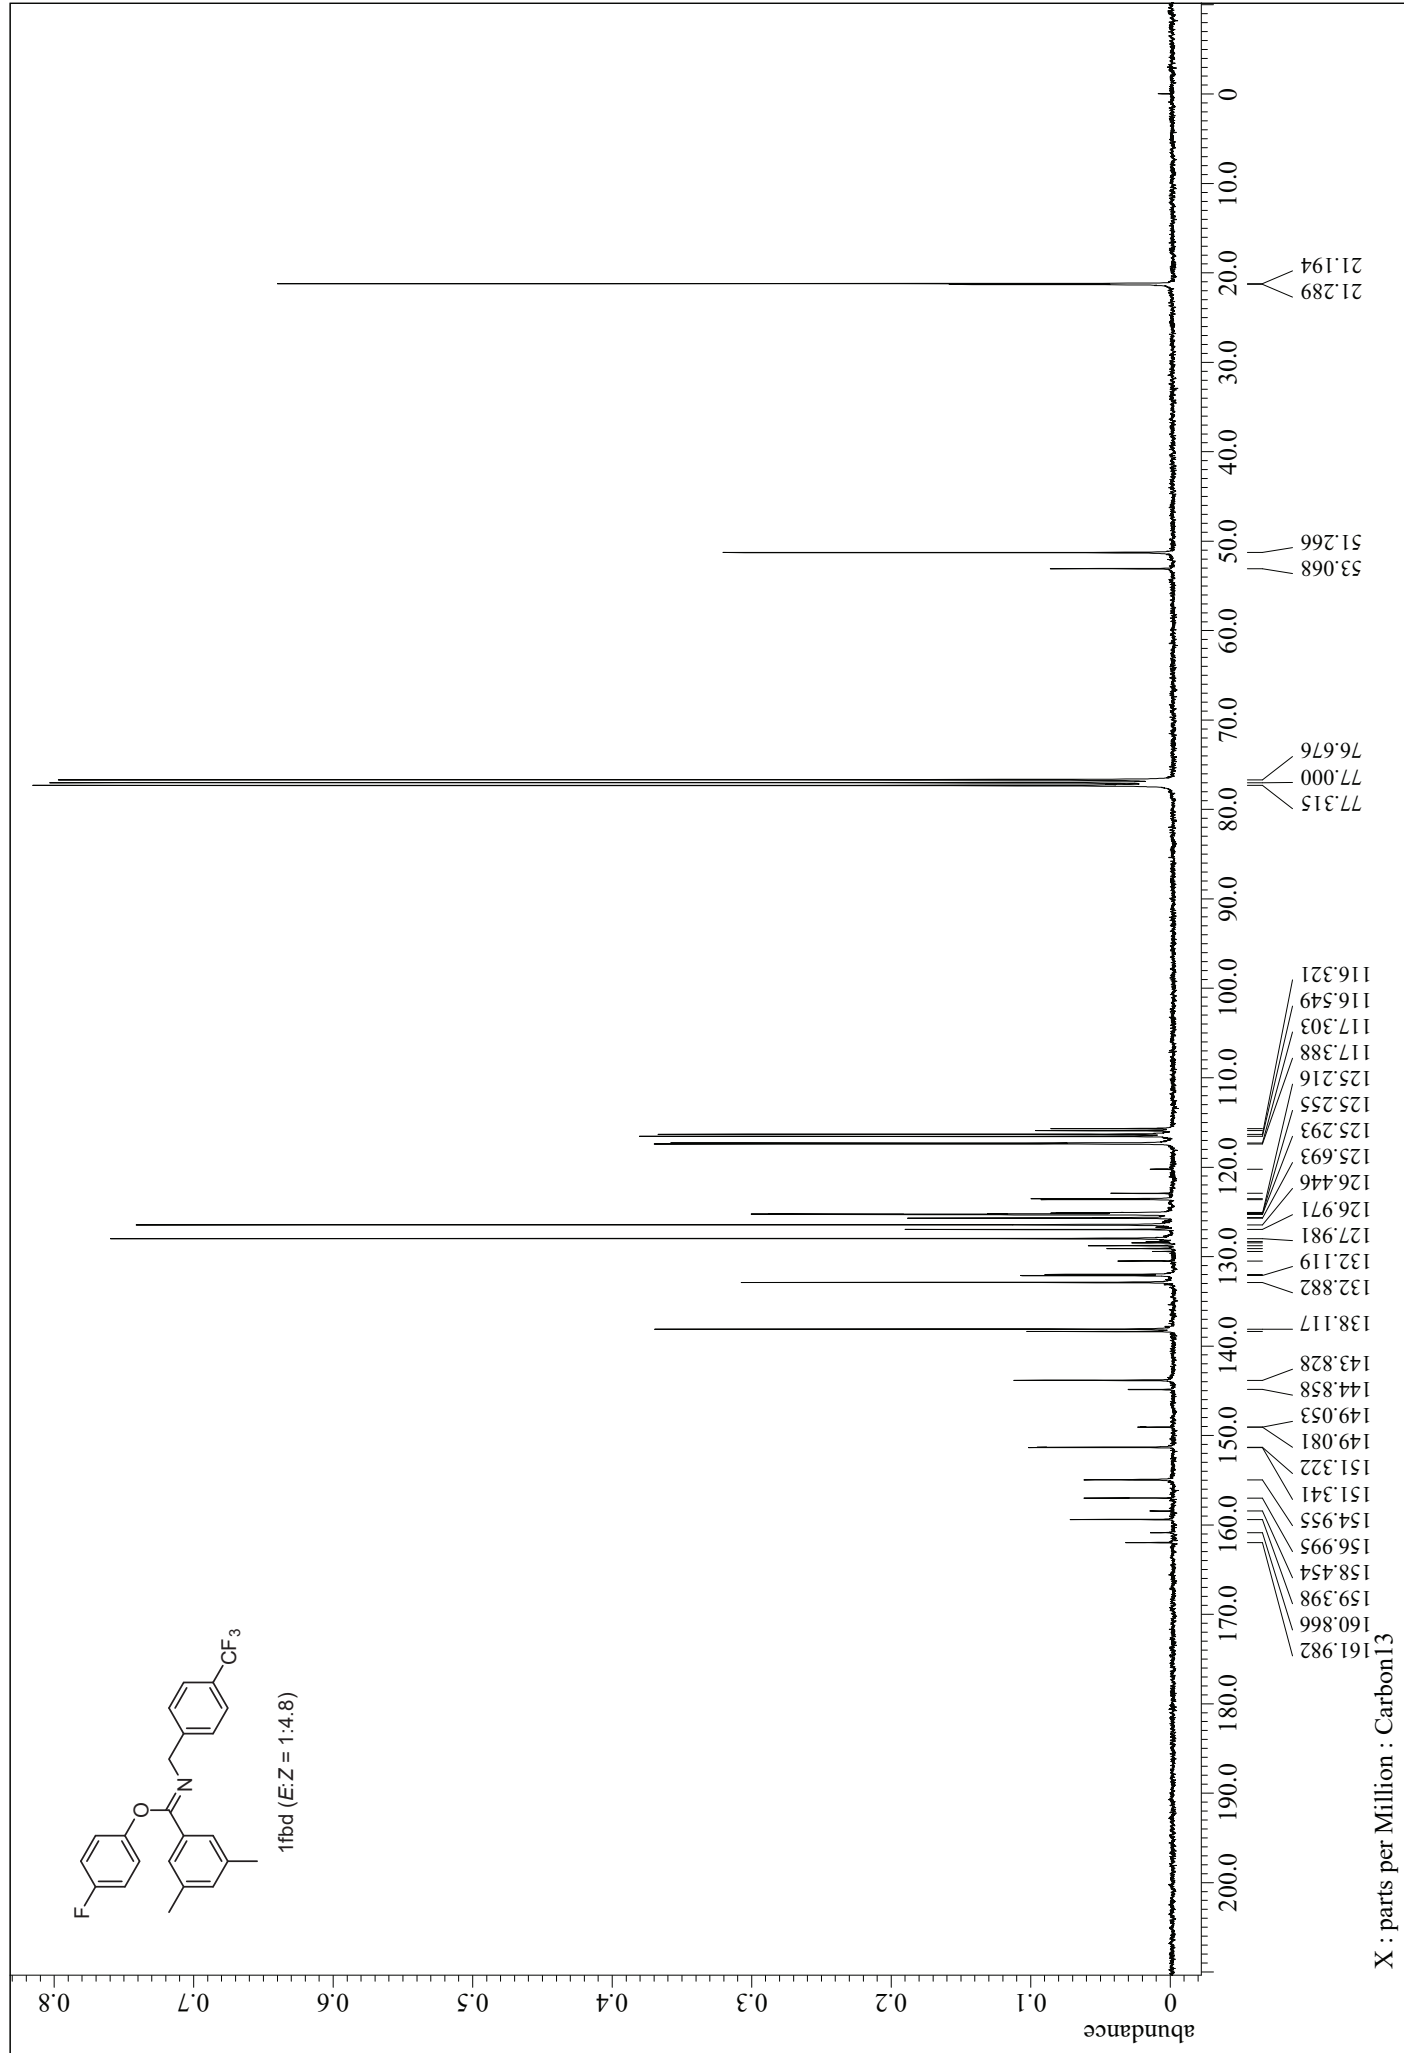

<sup>19</sup>F NMR (376 MHz, CDCl<sub>3</sub>)

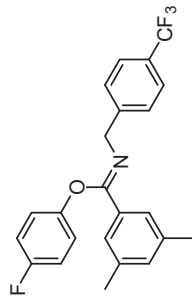

1fbd (E:Z = 1:4.8)

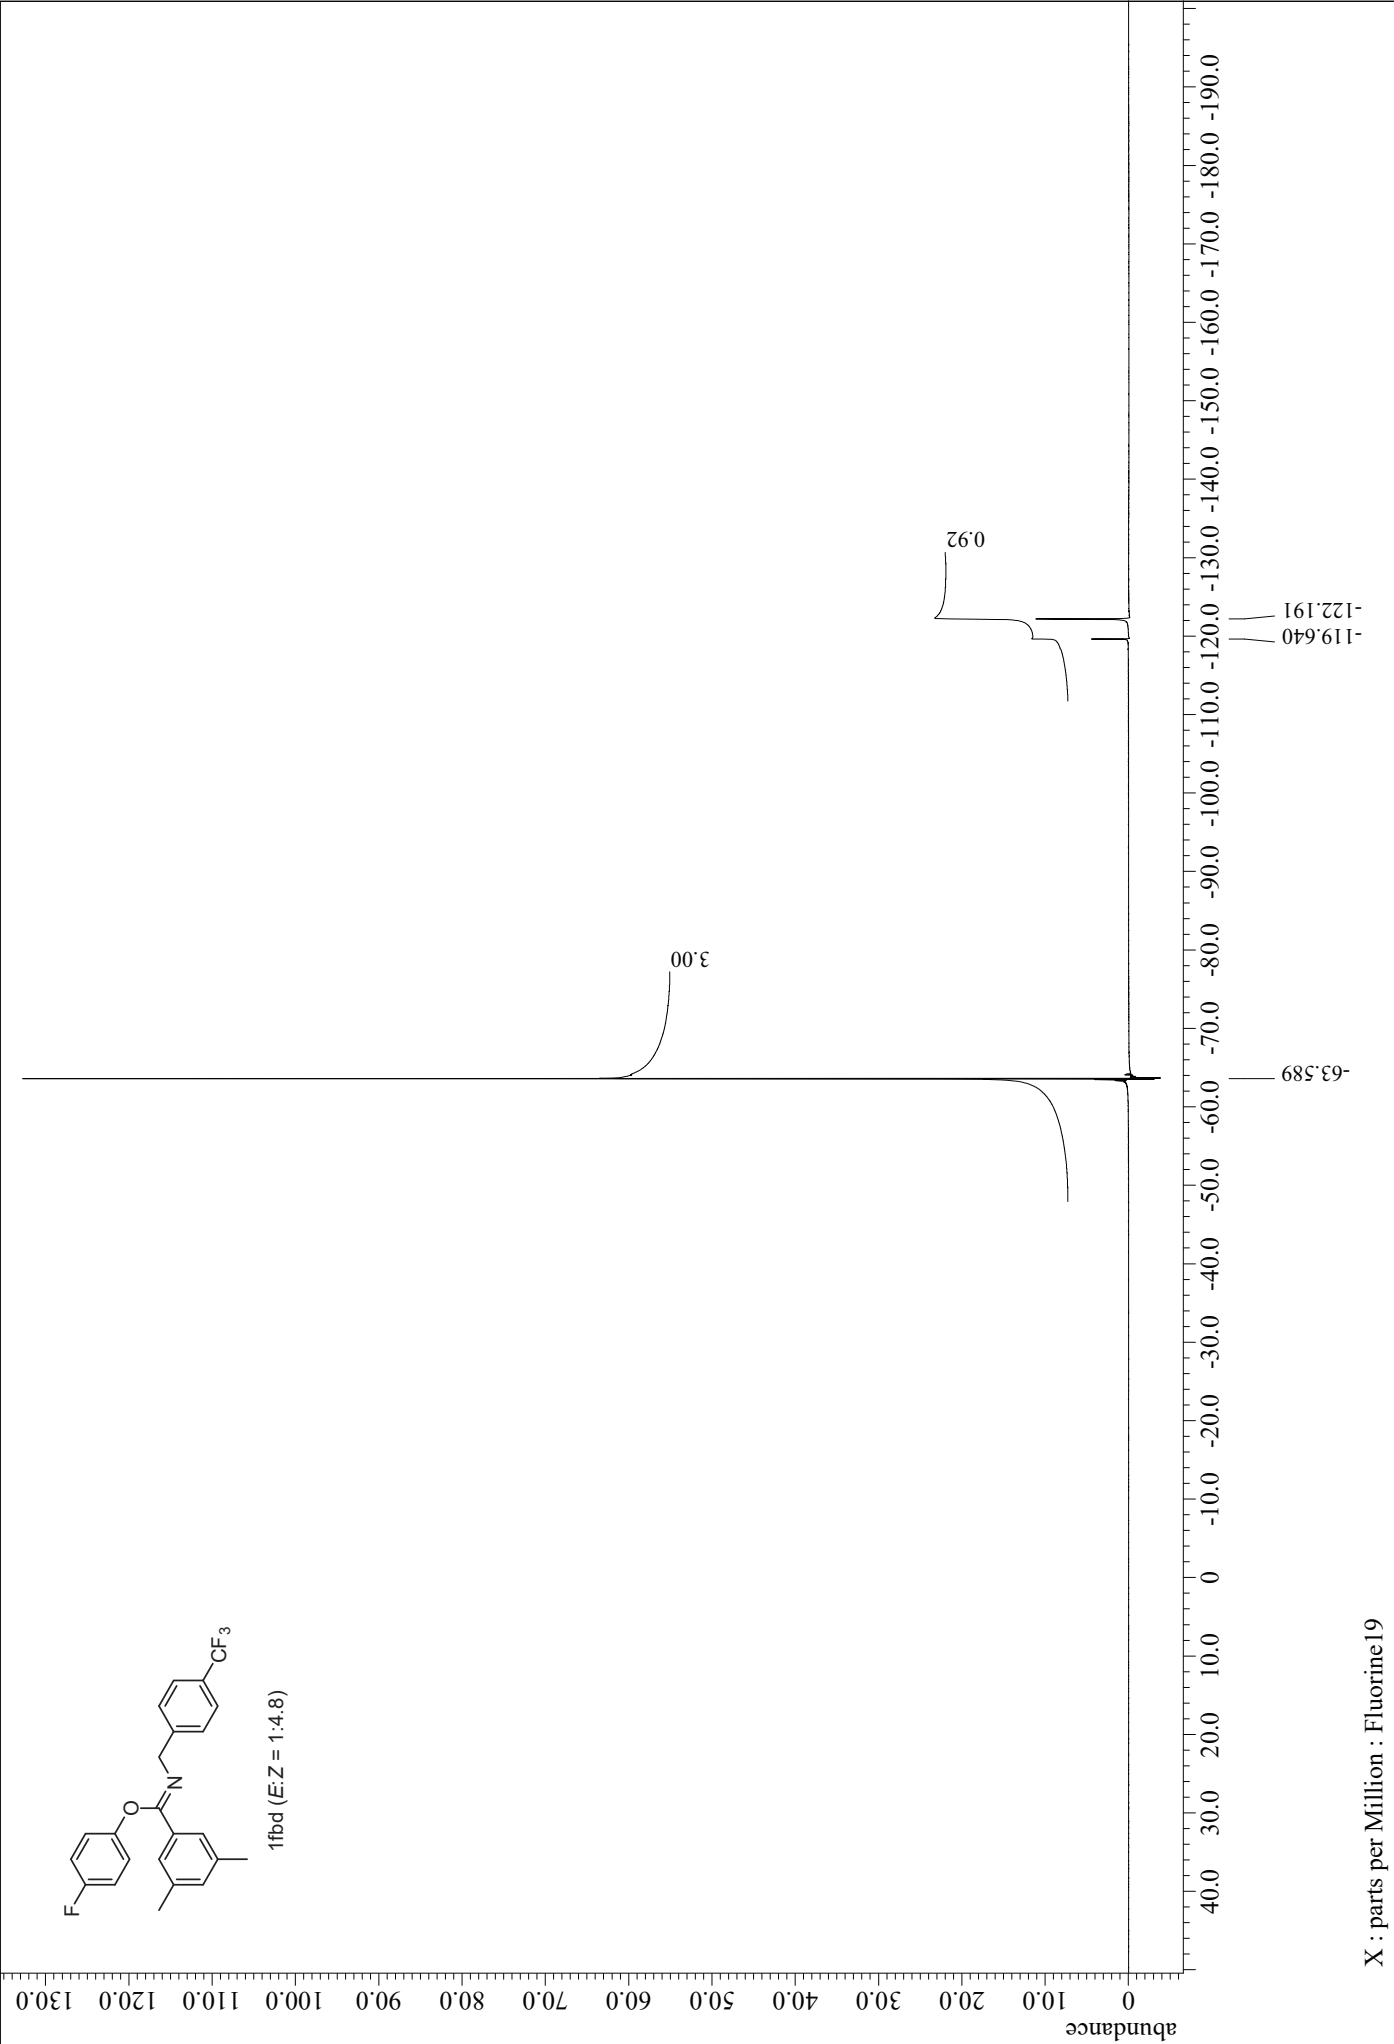

X : parts per Million : Fluorine19

<sup>1</sup>H NMR (400 MHz, CDCl<sub>3</sub>)

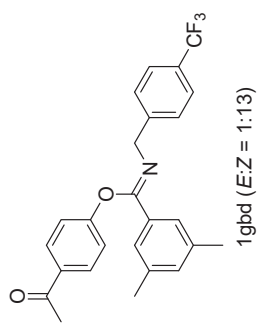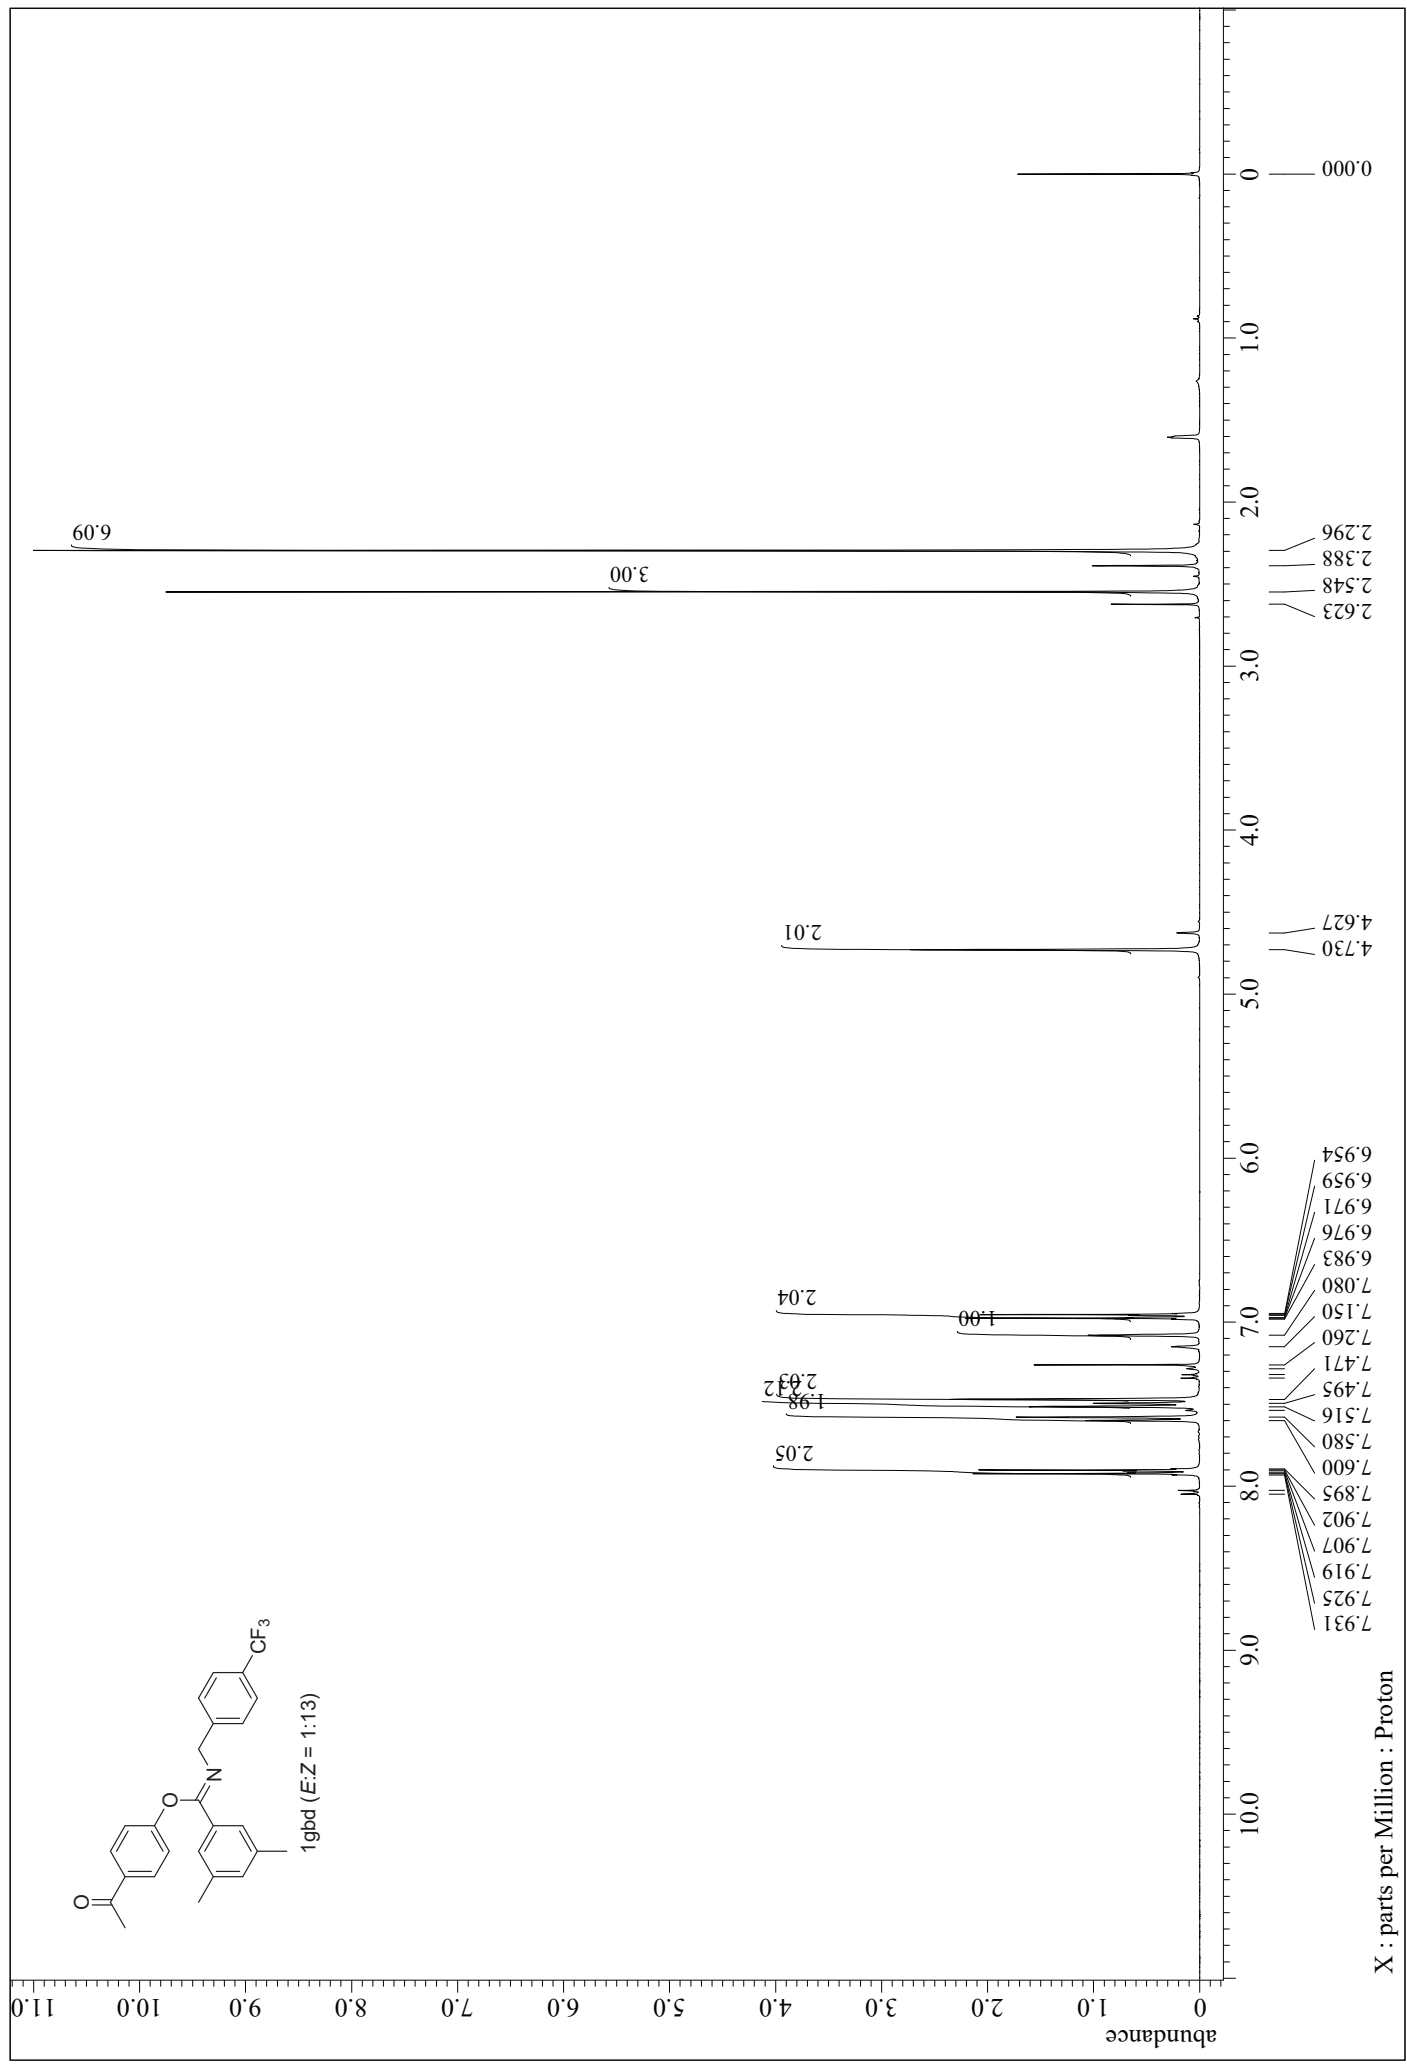

X : parts per Million : Proton

<sup>13</sup>C NMR (101 MHz, CDCl<sub>3</sub>)

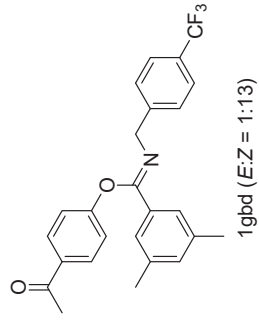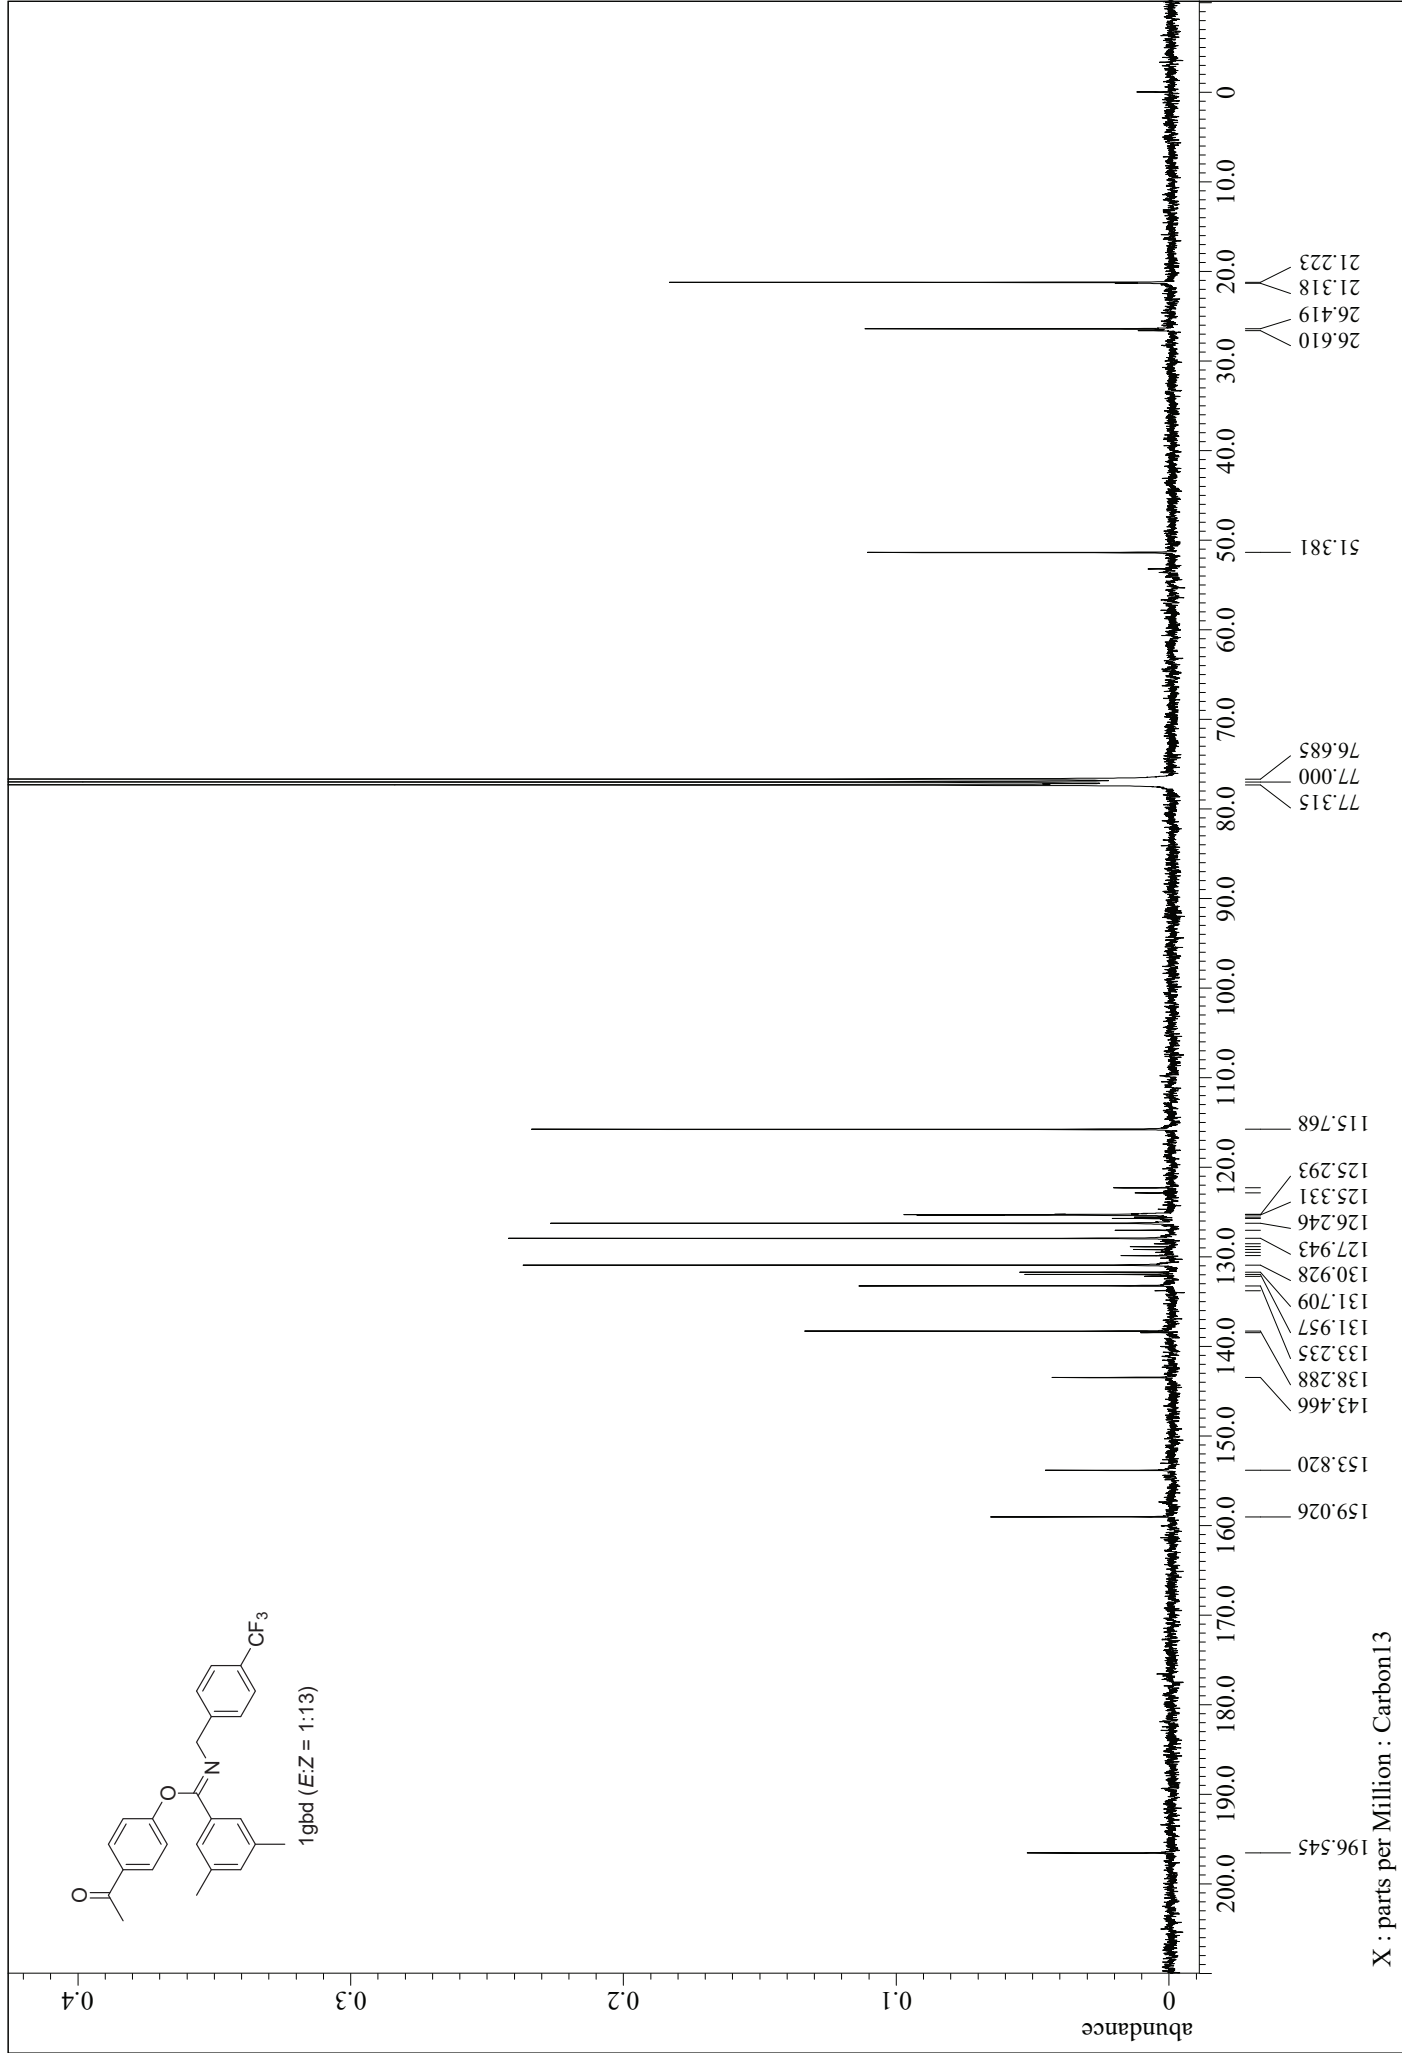

X : parts per Million : Carbon13

<sup>19</sup>F NMR (376 MHz, CDCl<sub>3</sub>)

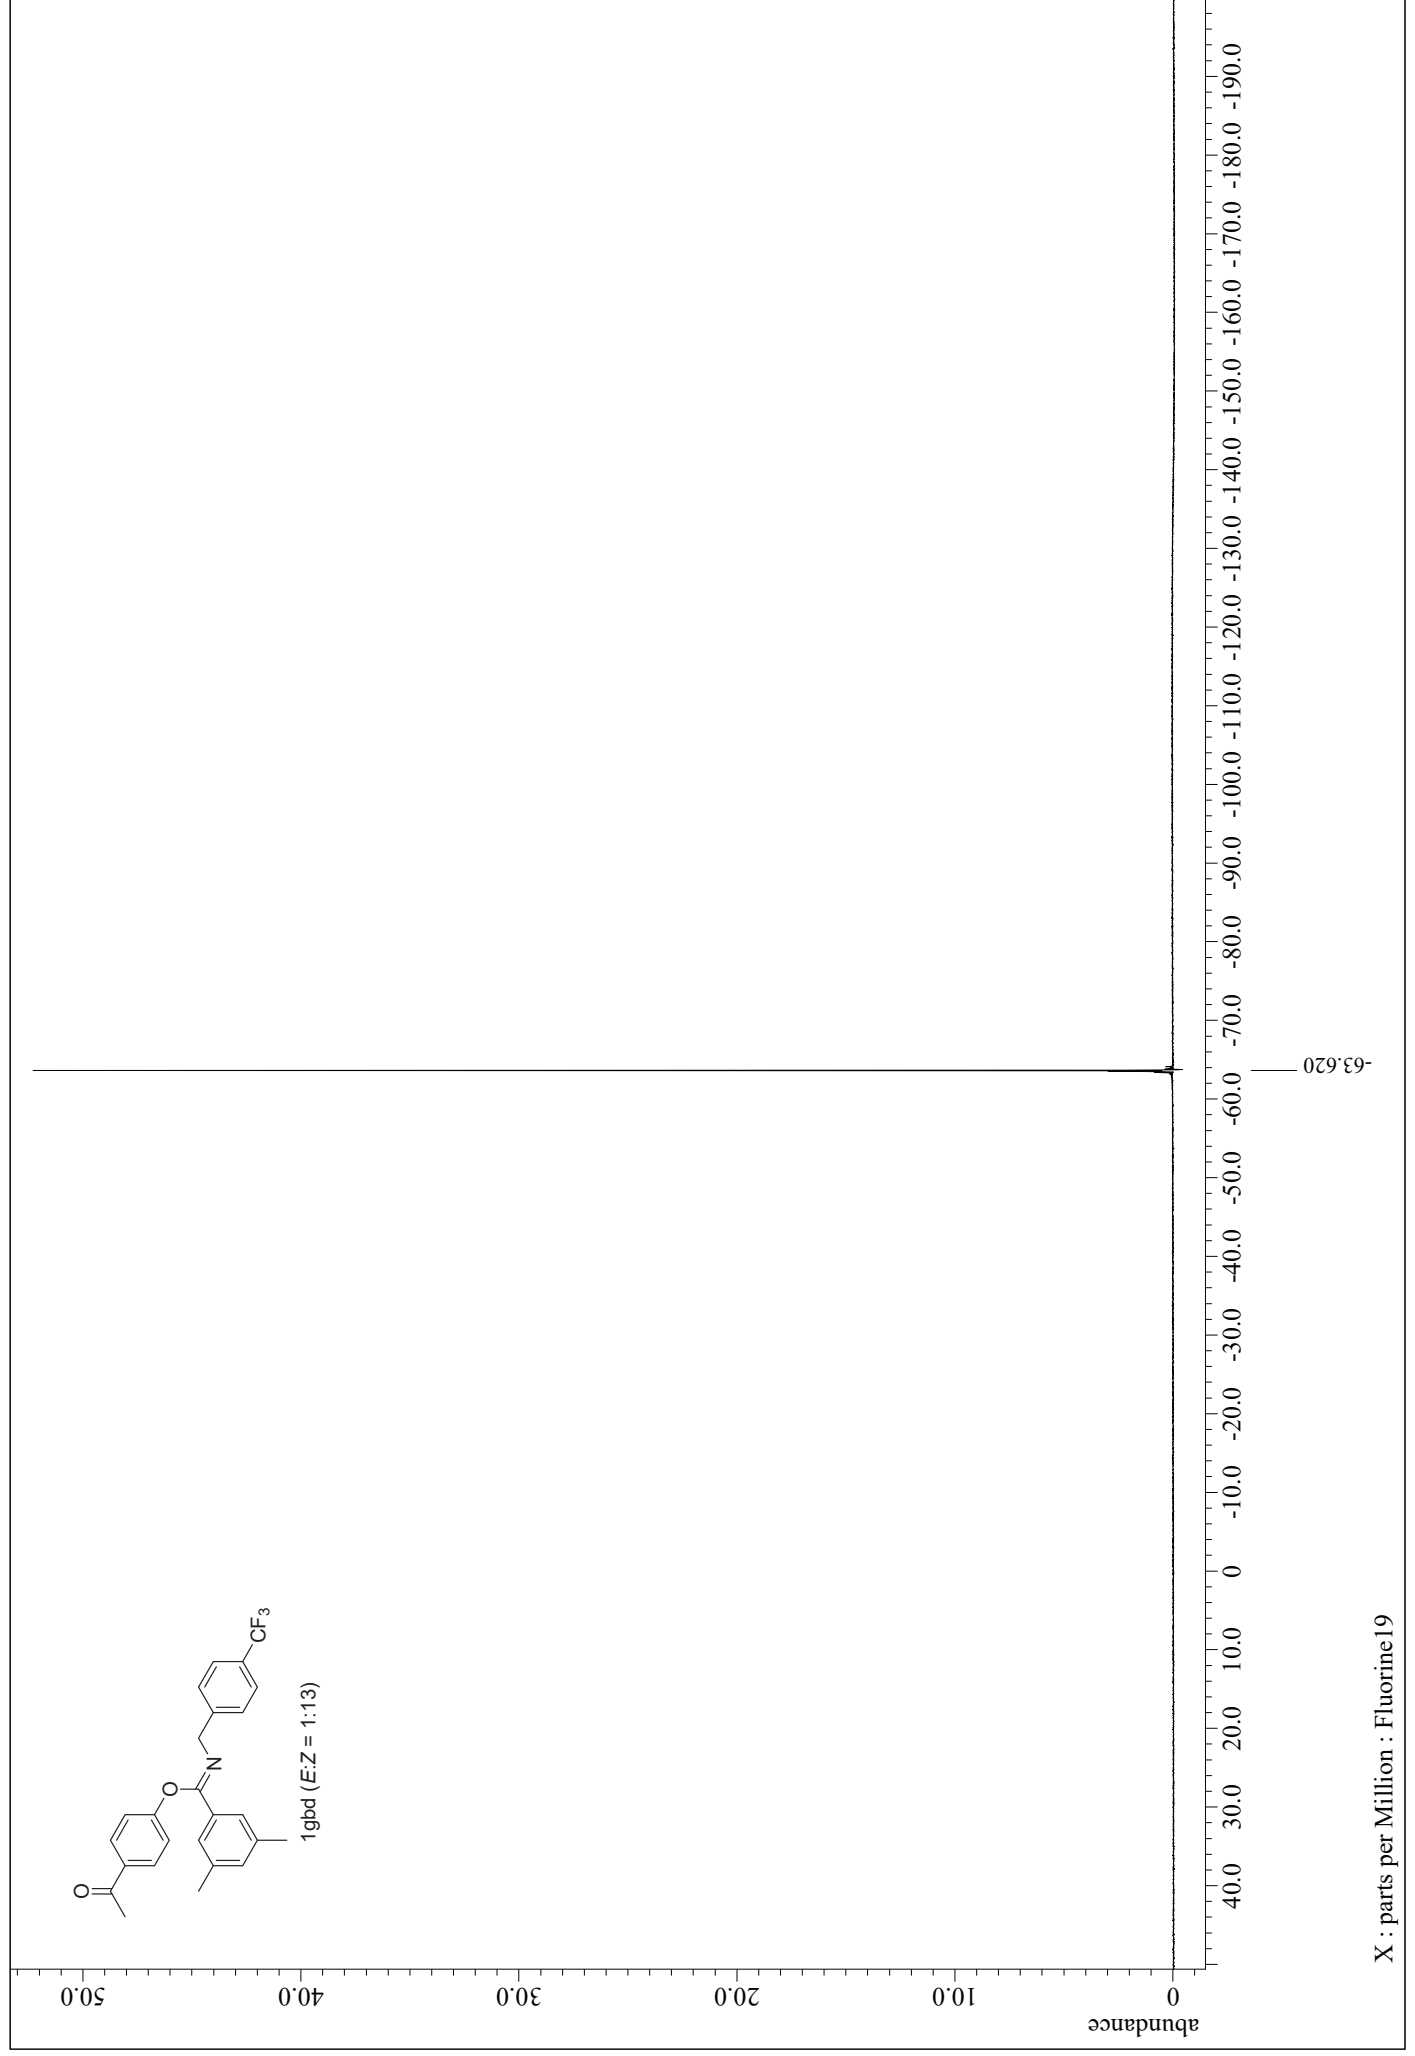

X : parts per Million : Fluorine 19

<sup>1</sup>H NMR (400 MHz, CDCl<sub>3</sub>)

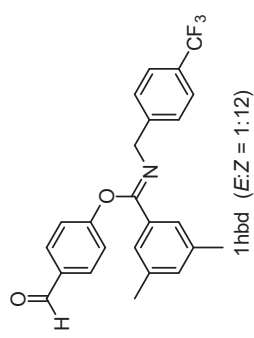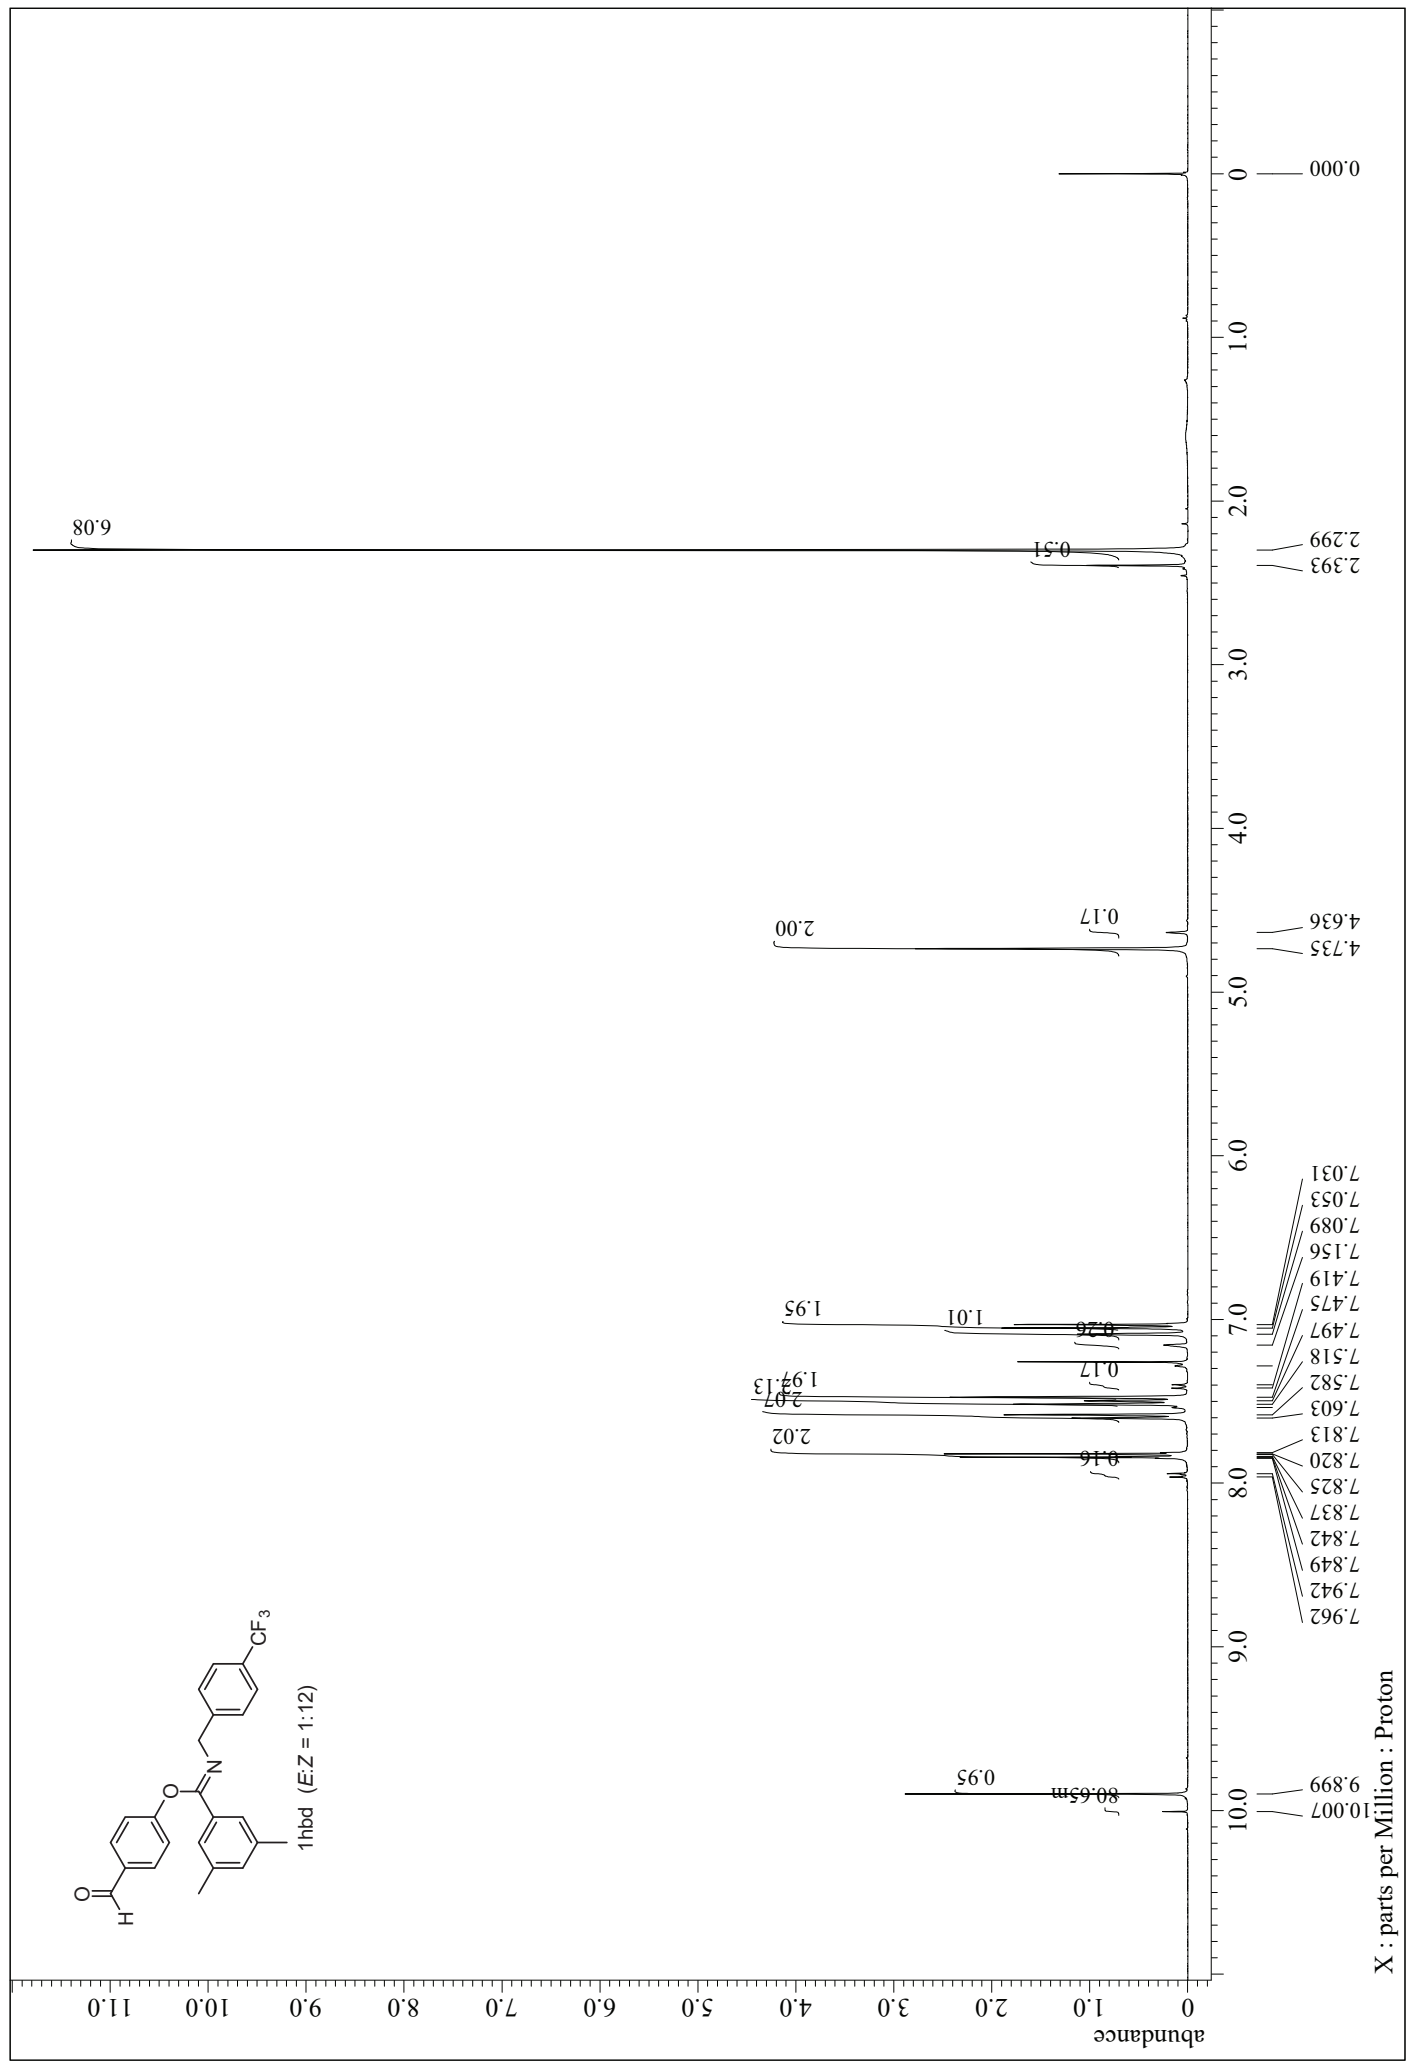

X : parts per Million : Proton



<sup>13</sup>C NMR (101 MHz, CDCl<sub>3</sub>)

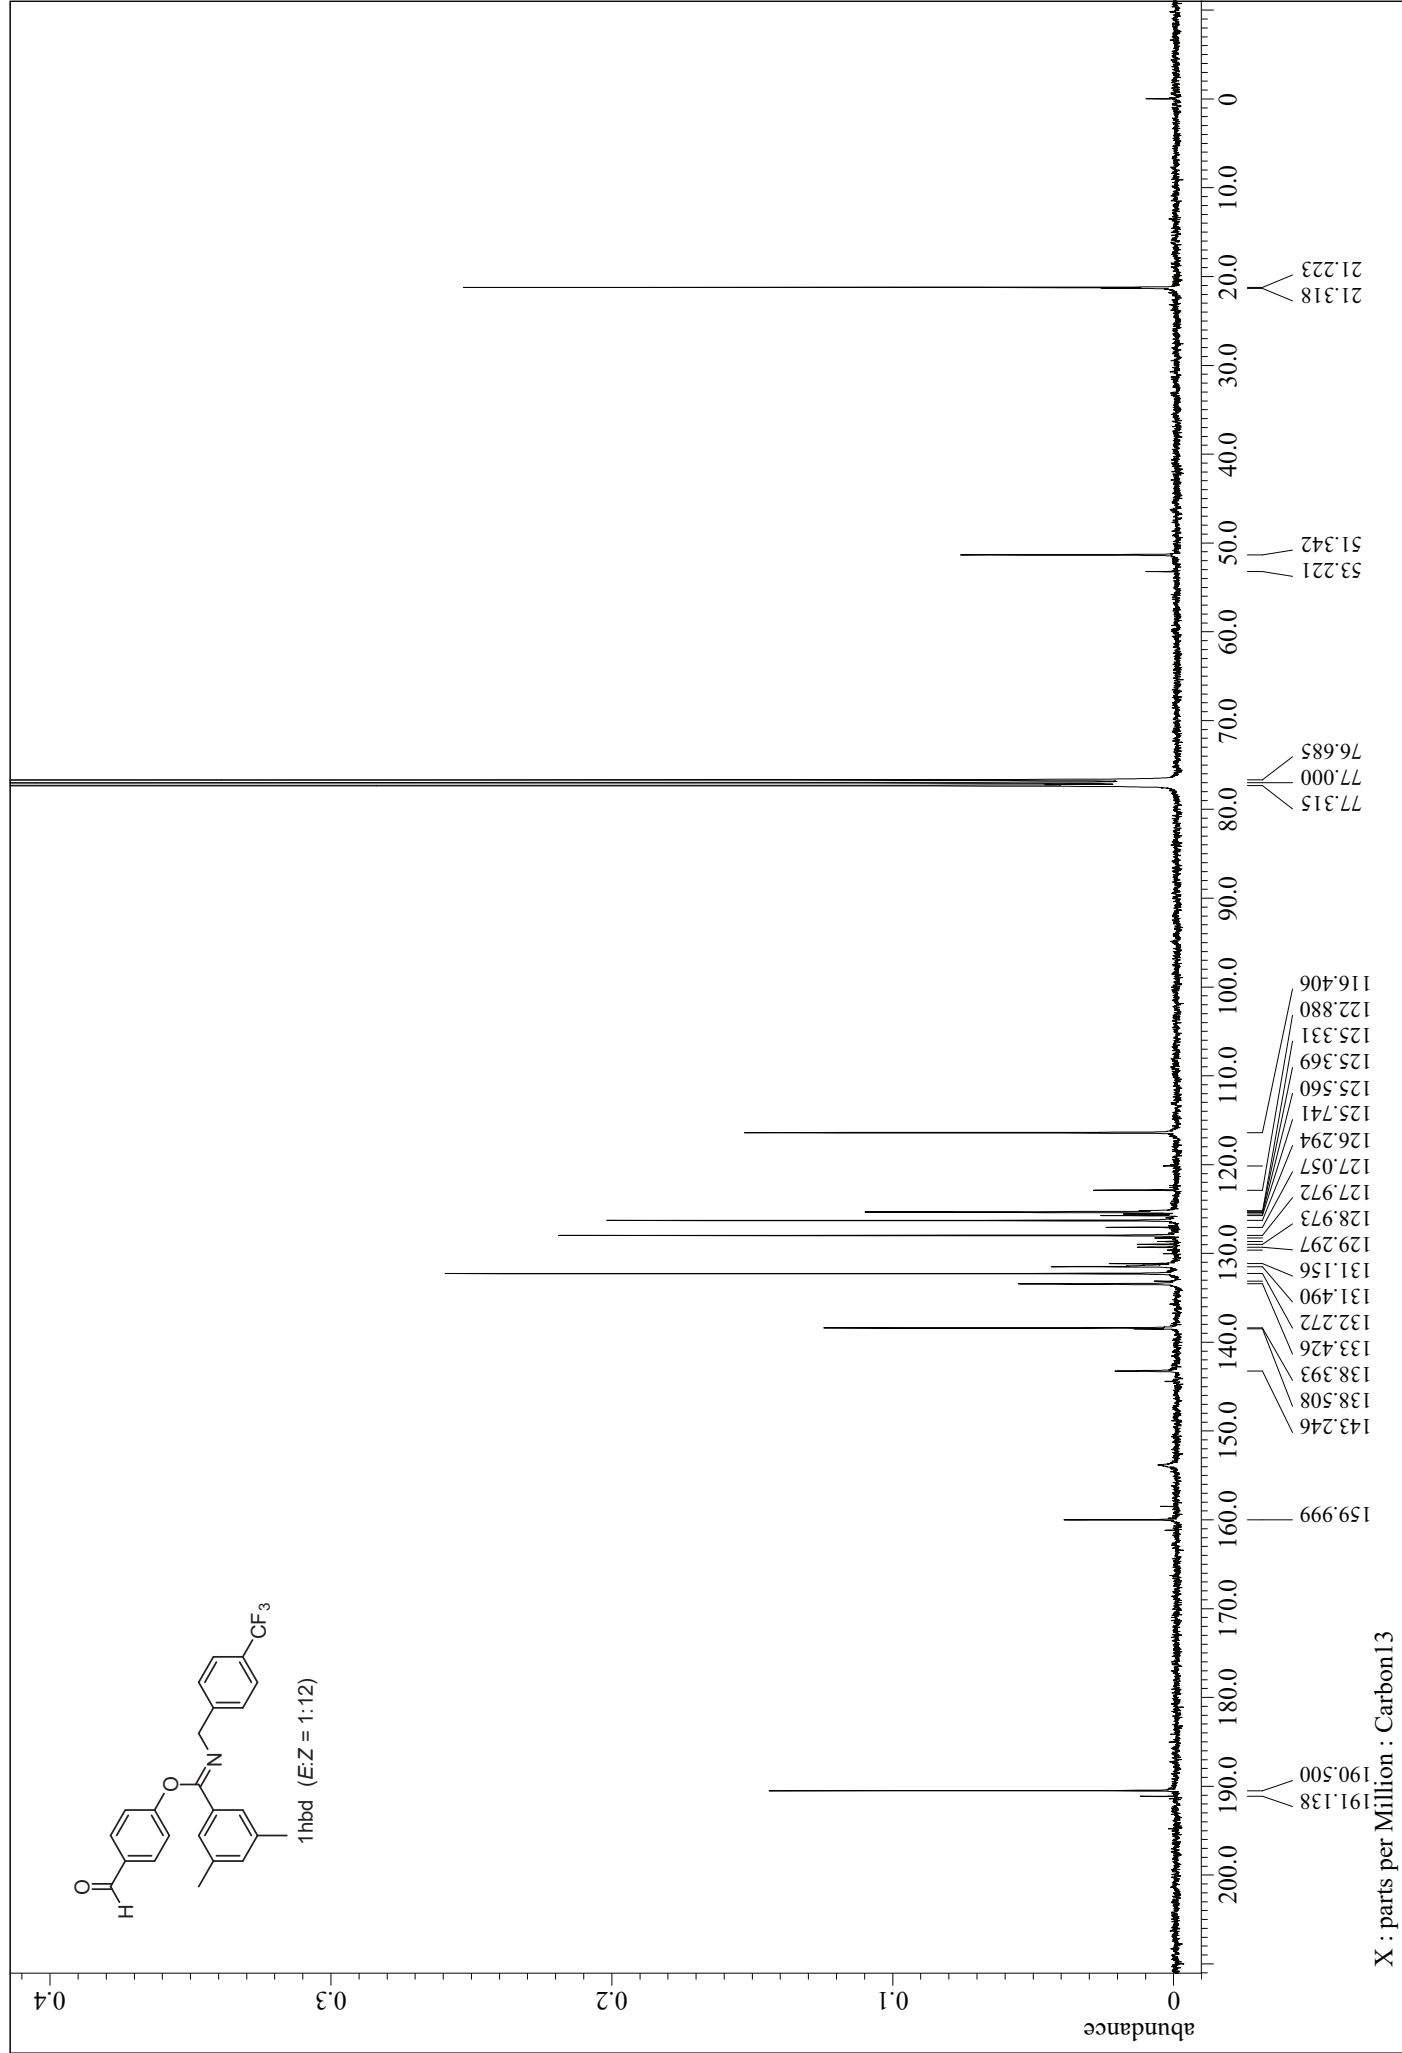

<sup>19</sup>F NMR (376 MHz, CDCl<sub>3</sub>)

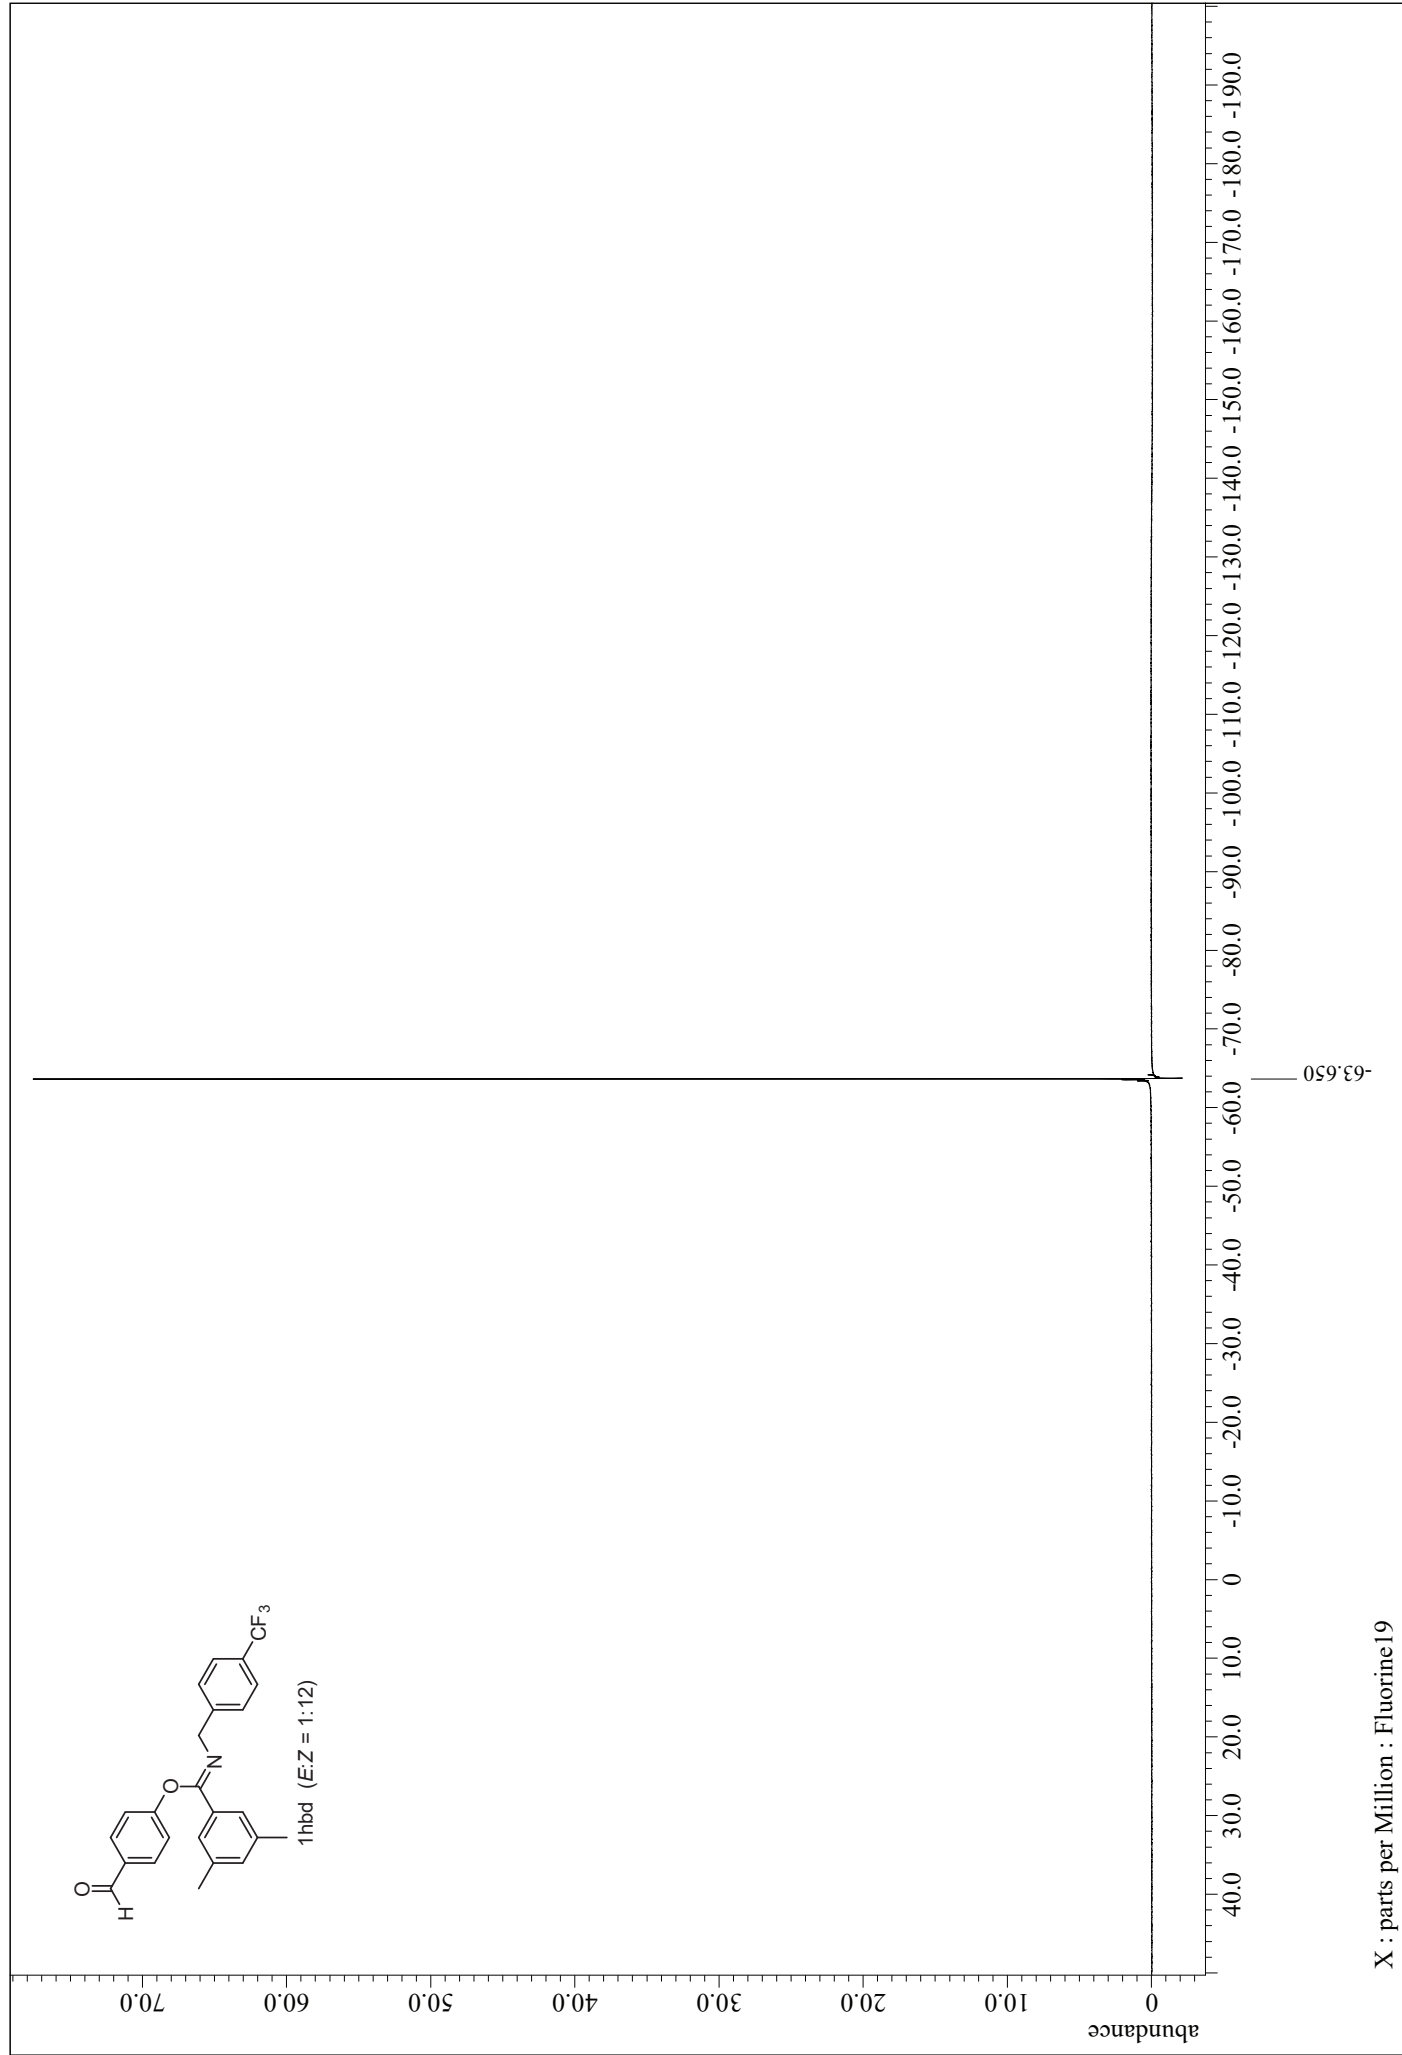

X : parts per Million : Fluorine 19

<sup>1</sup>H NMR (400 MHz, CDCl<sub>3</sub>)

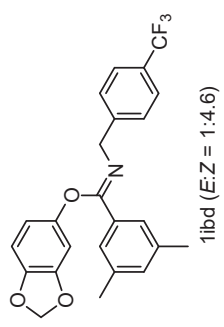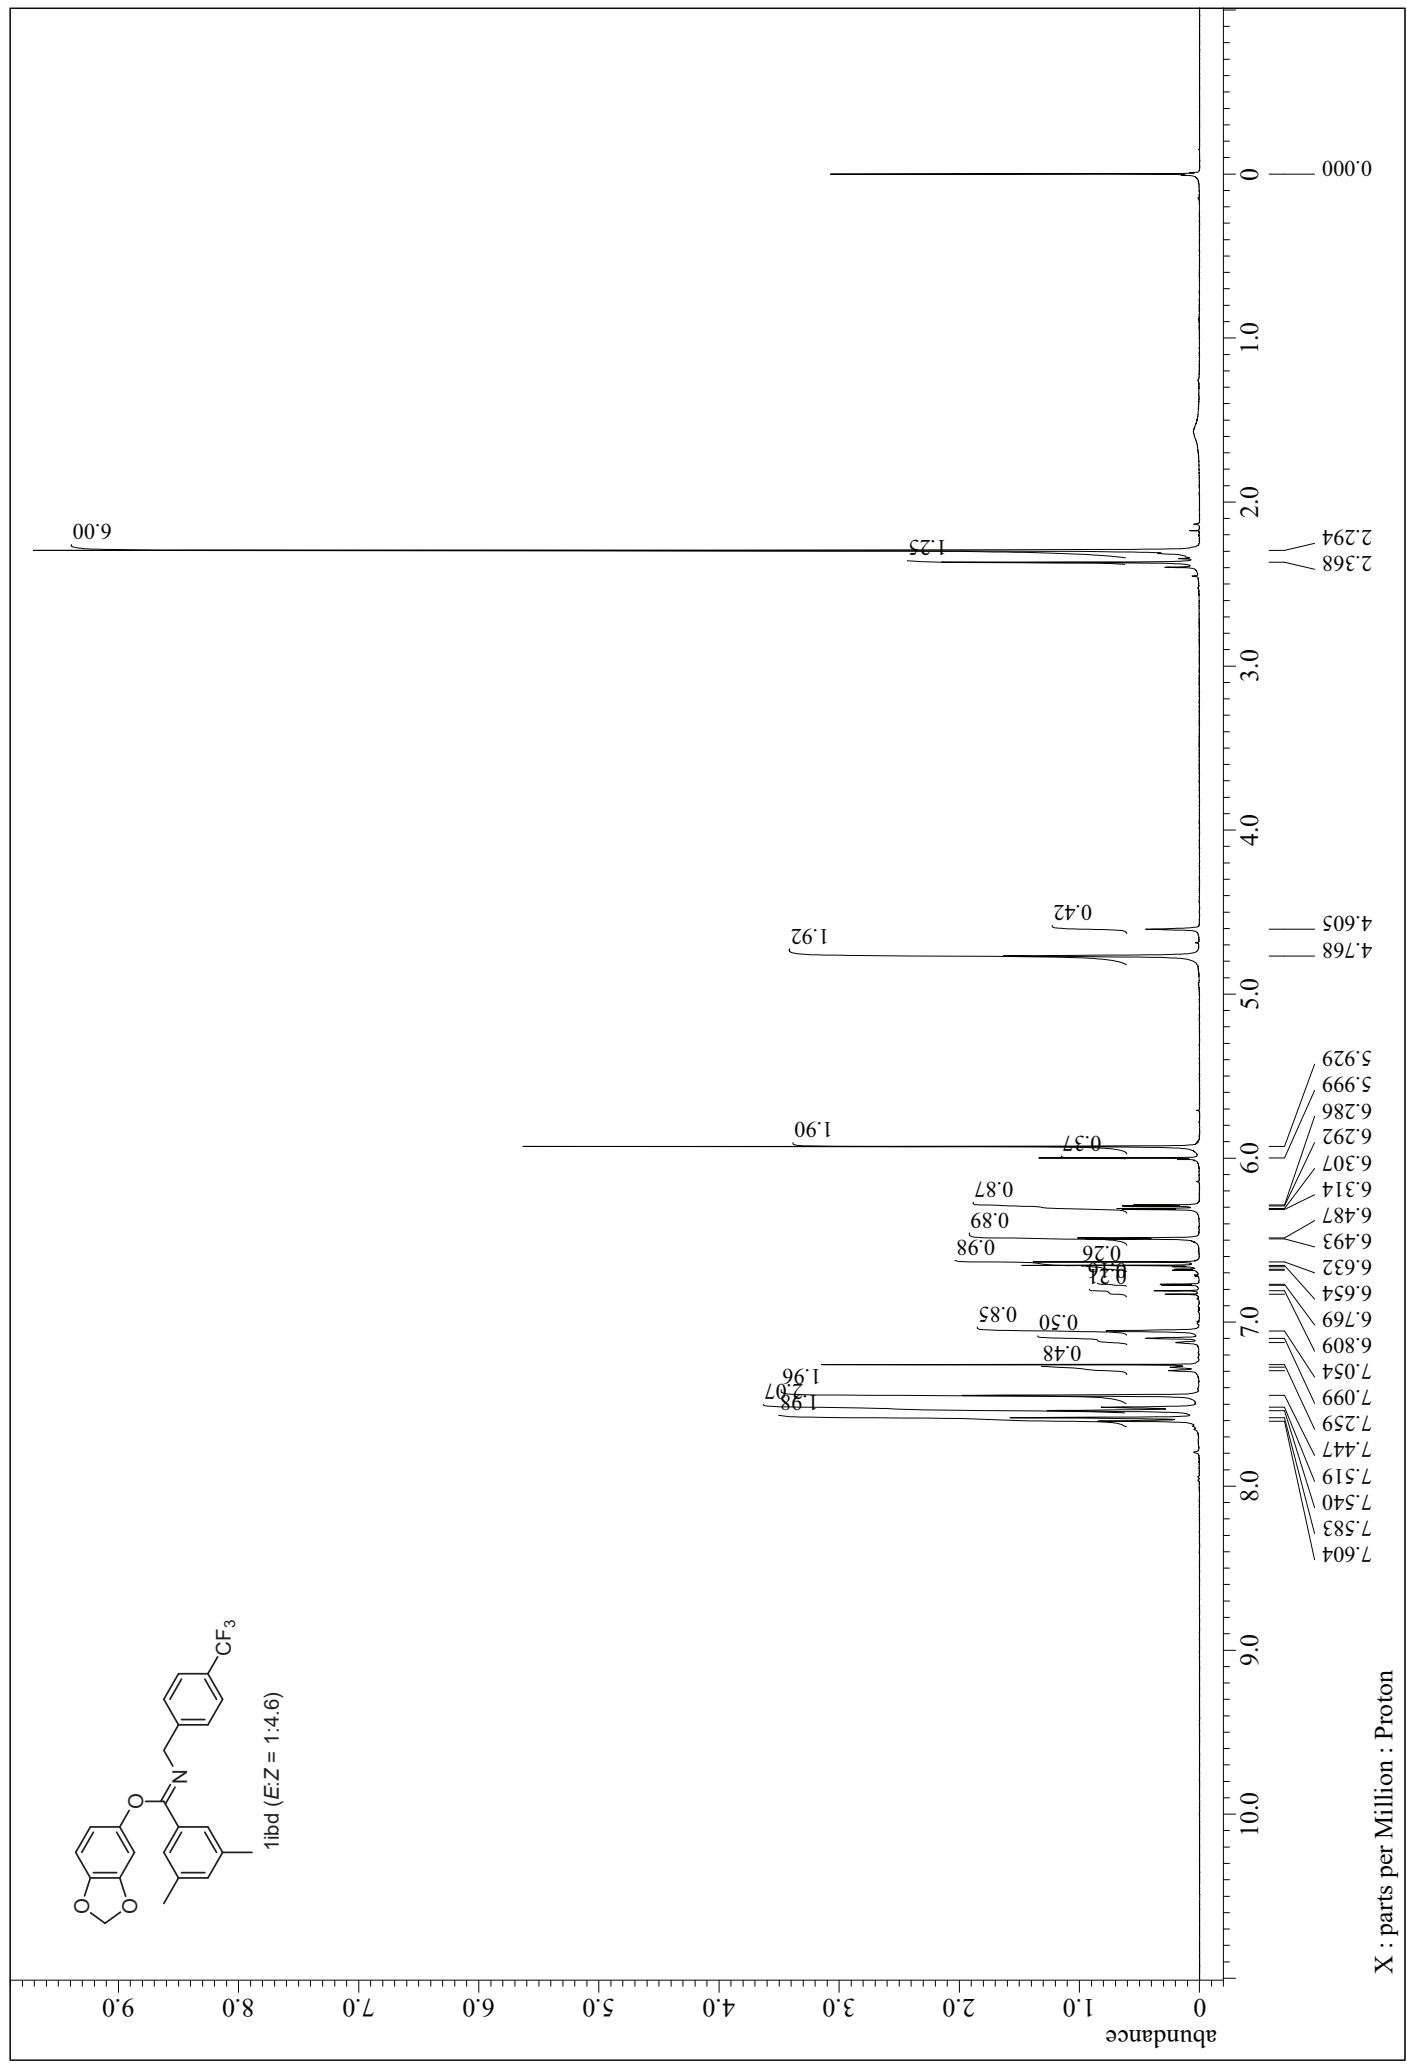

<sup>13</sup>C NMR (101 MHz, CDCl<sub>3</sub>)

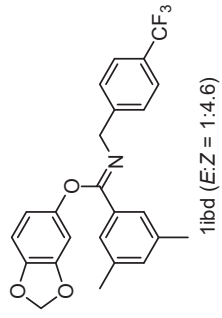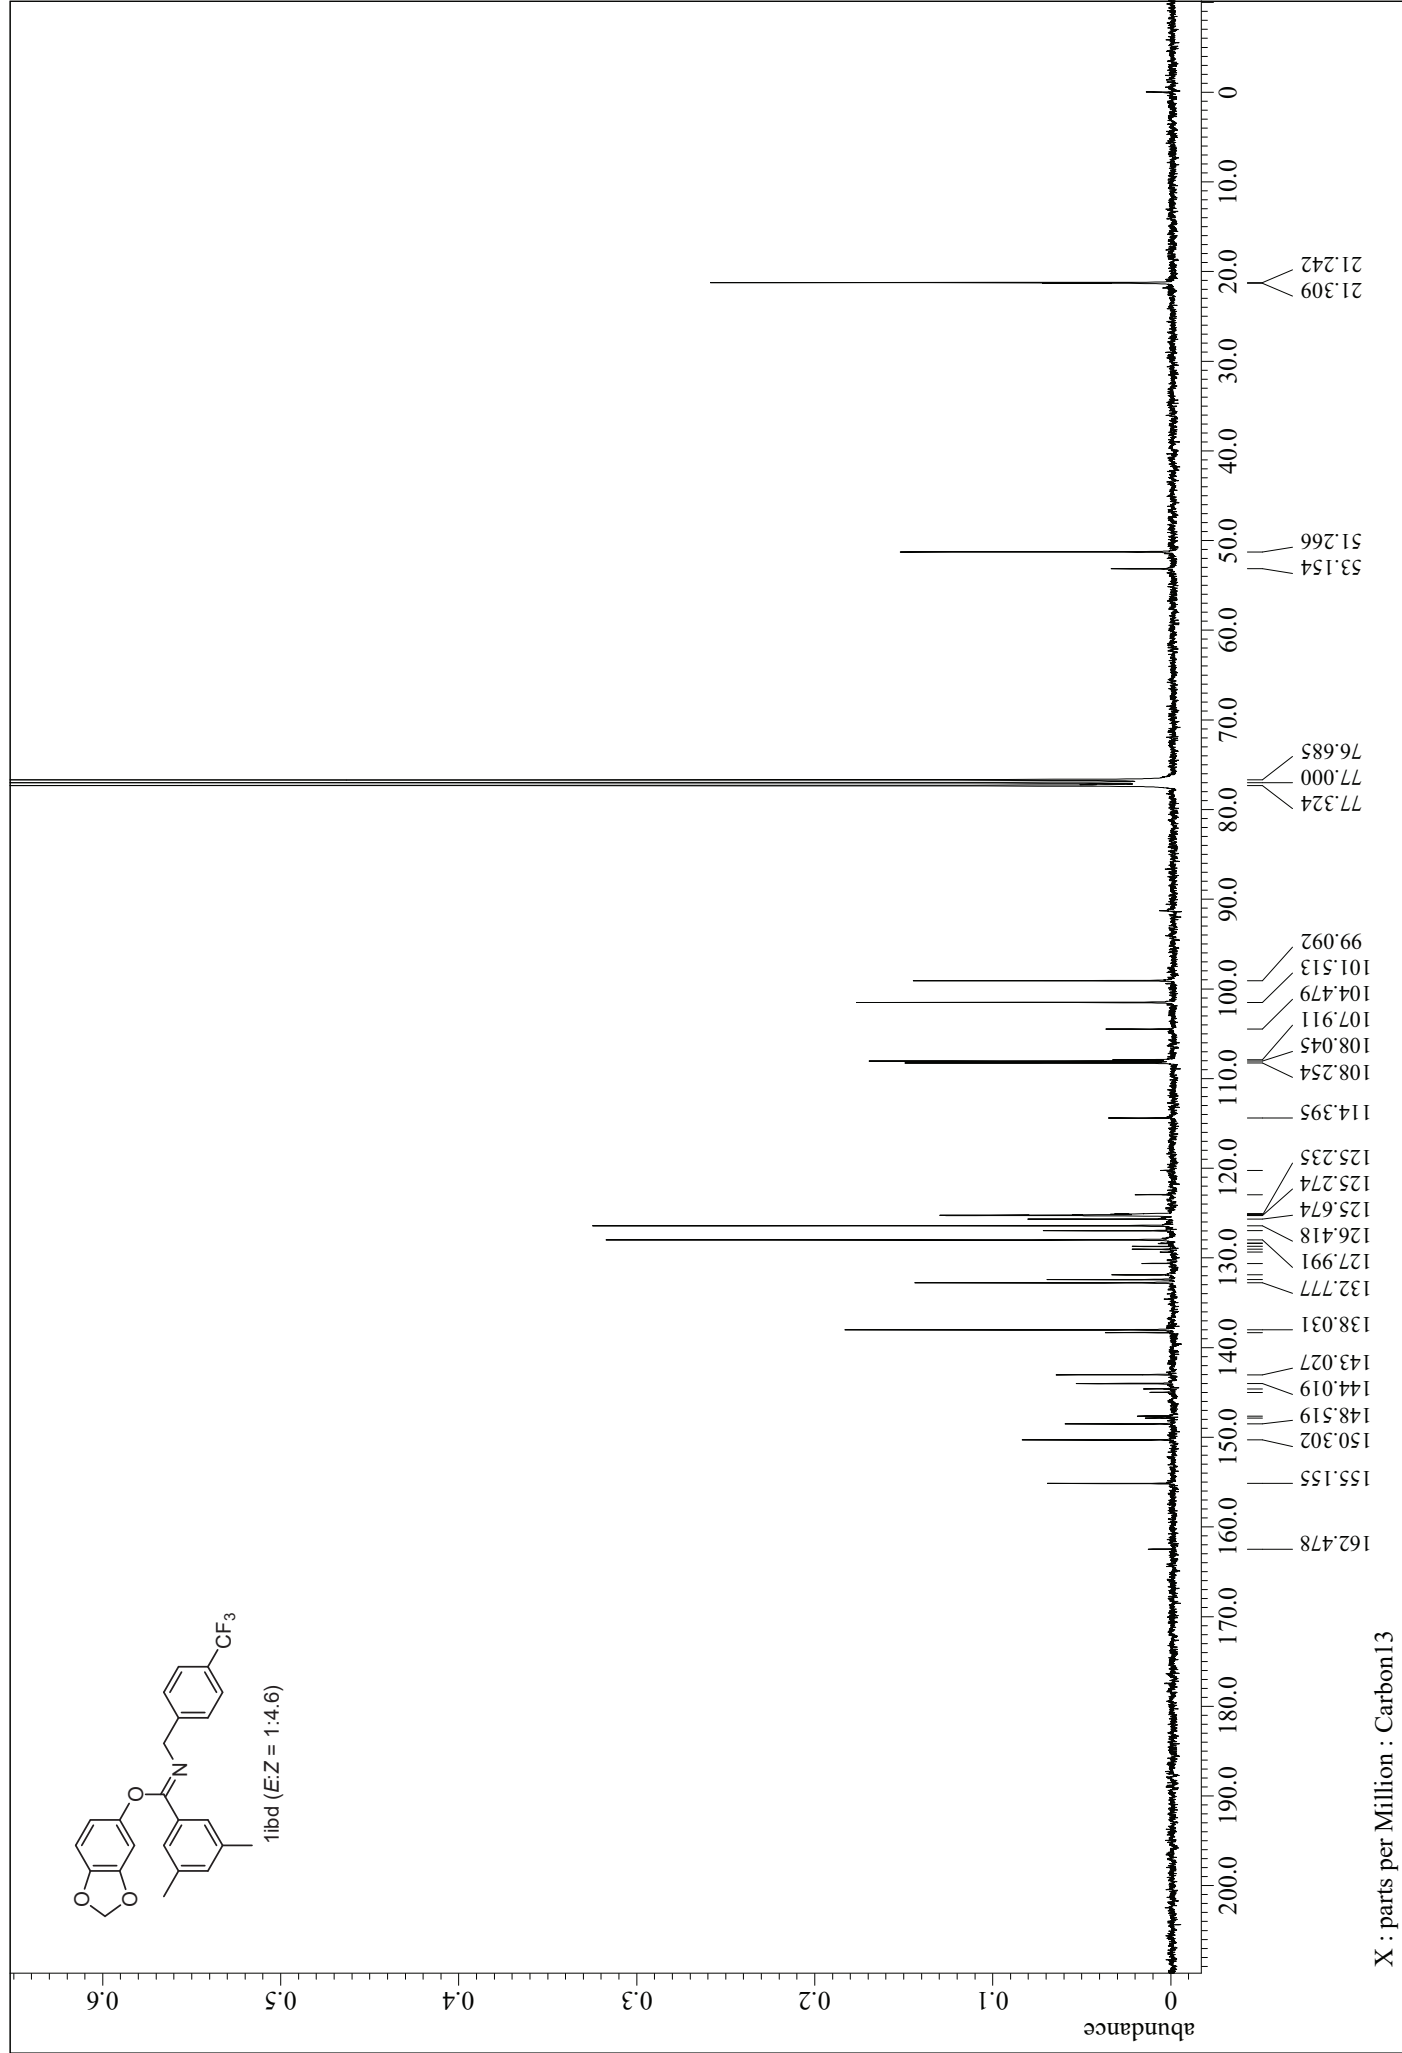

$^{19}\text{F}$  NMR (376 MHz,  $\text{CDCl}_3$ )

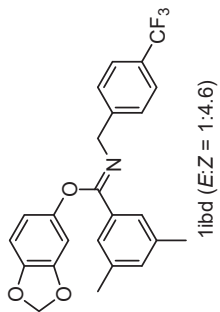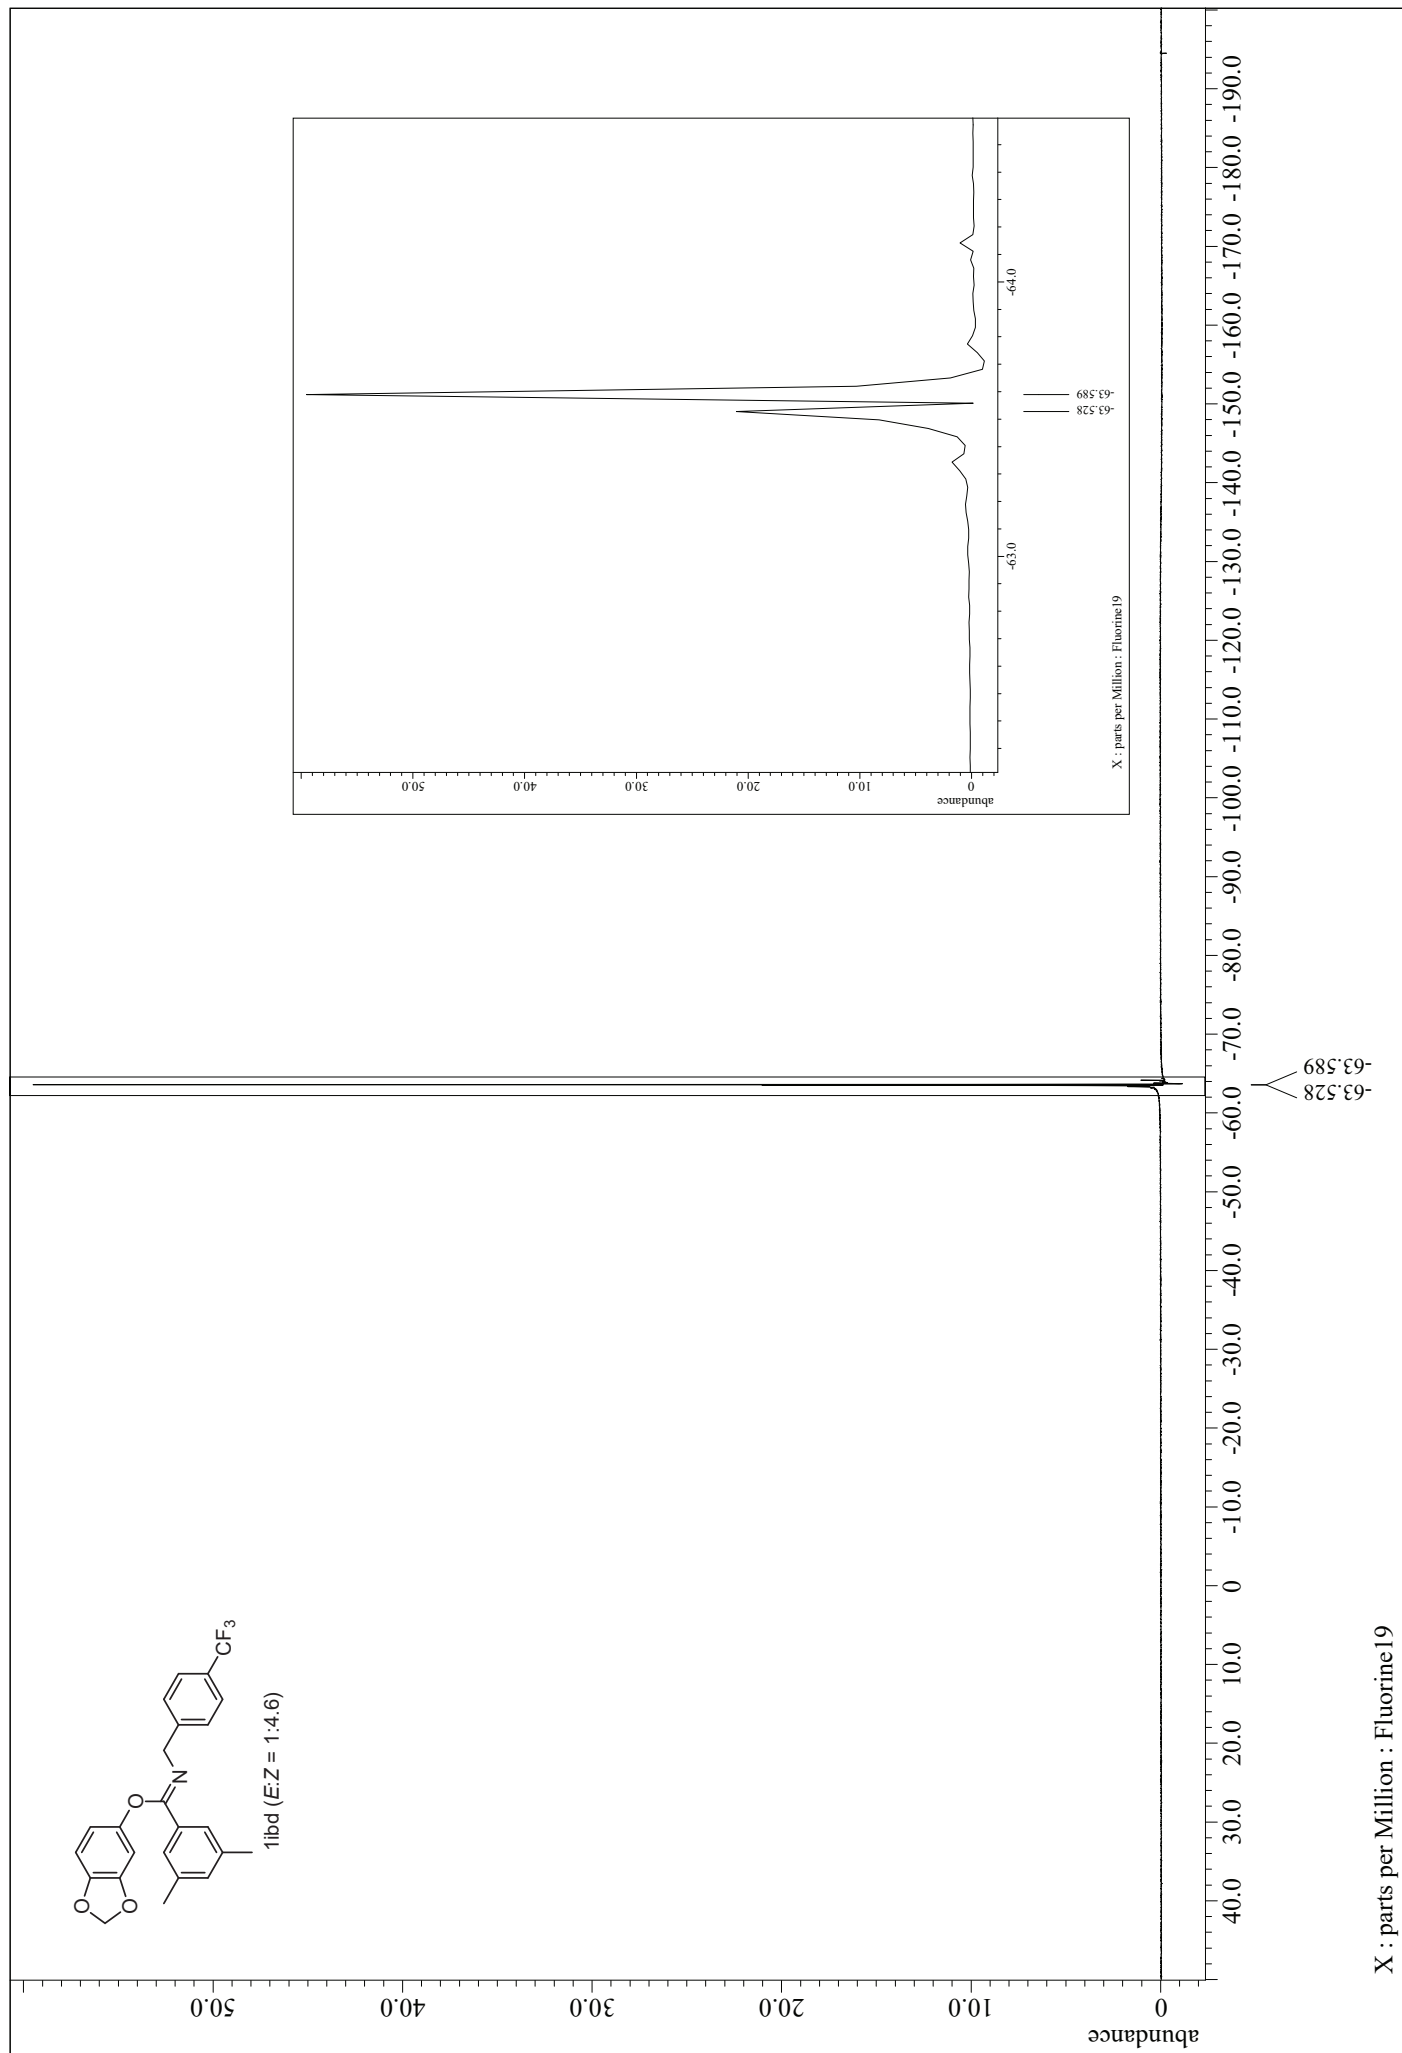

X : parts per Million : Fluorine19

<sup>1</sup>H NMR (400 MHz, CDCl<sub>3</sub>)

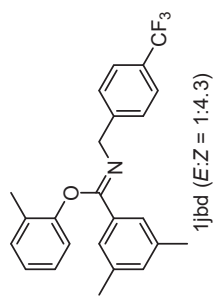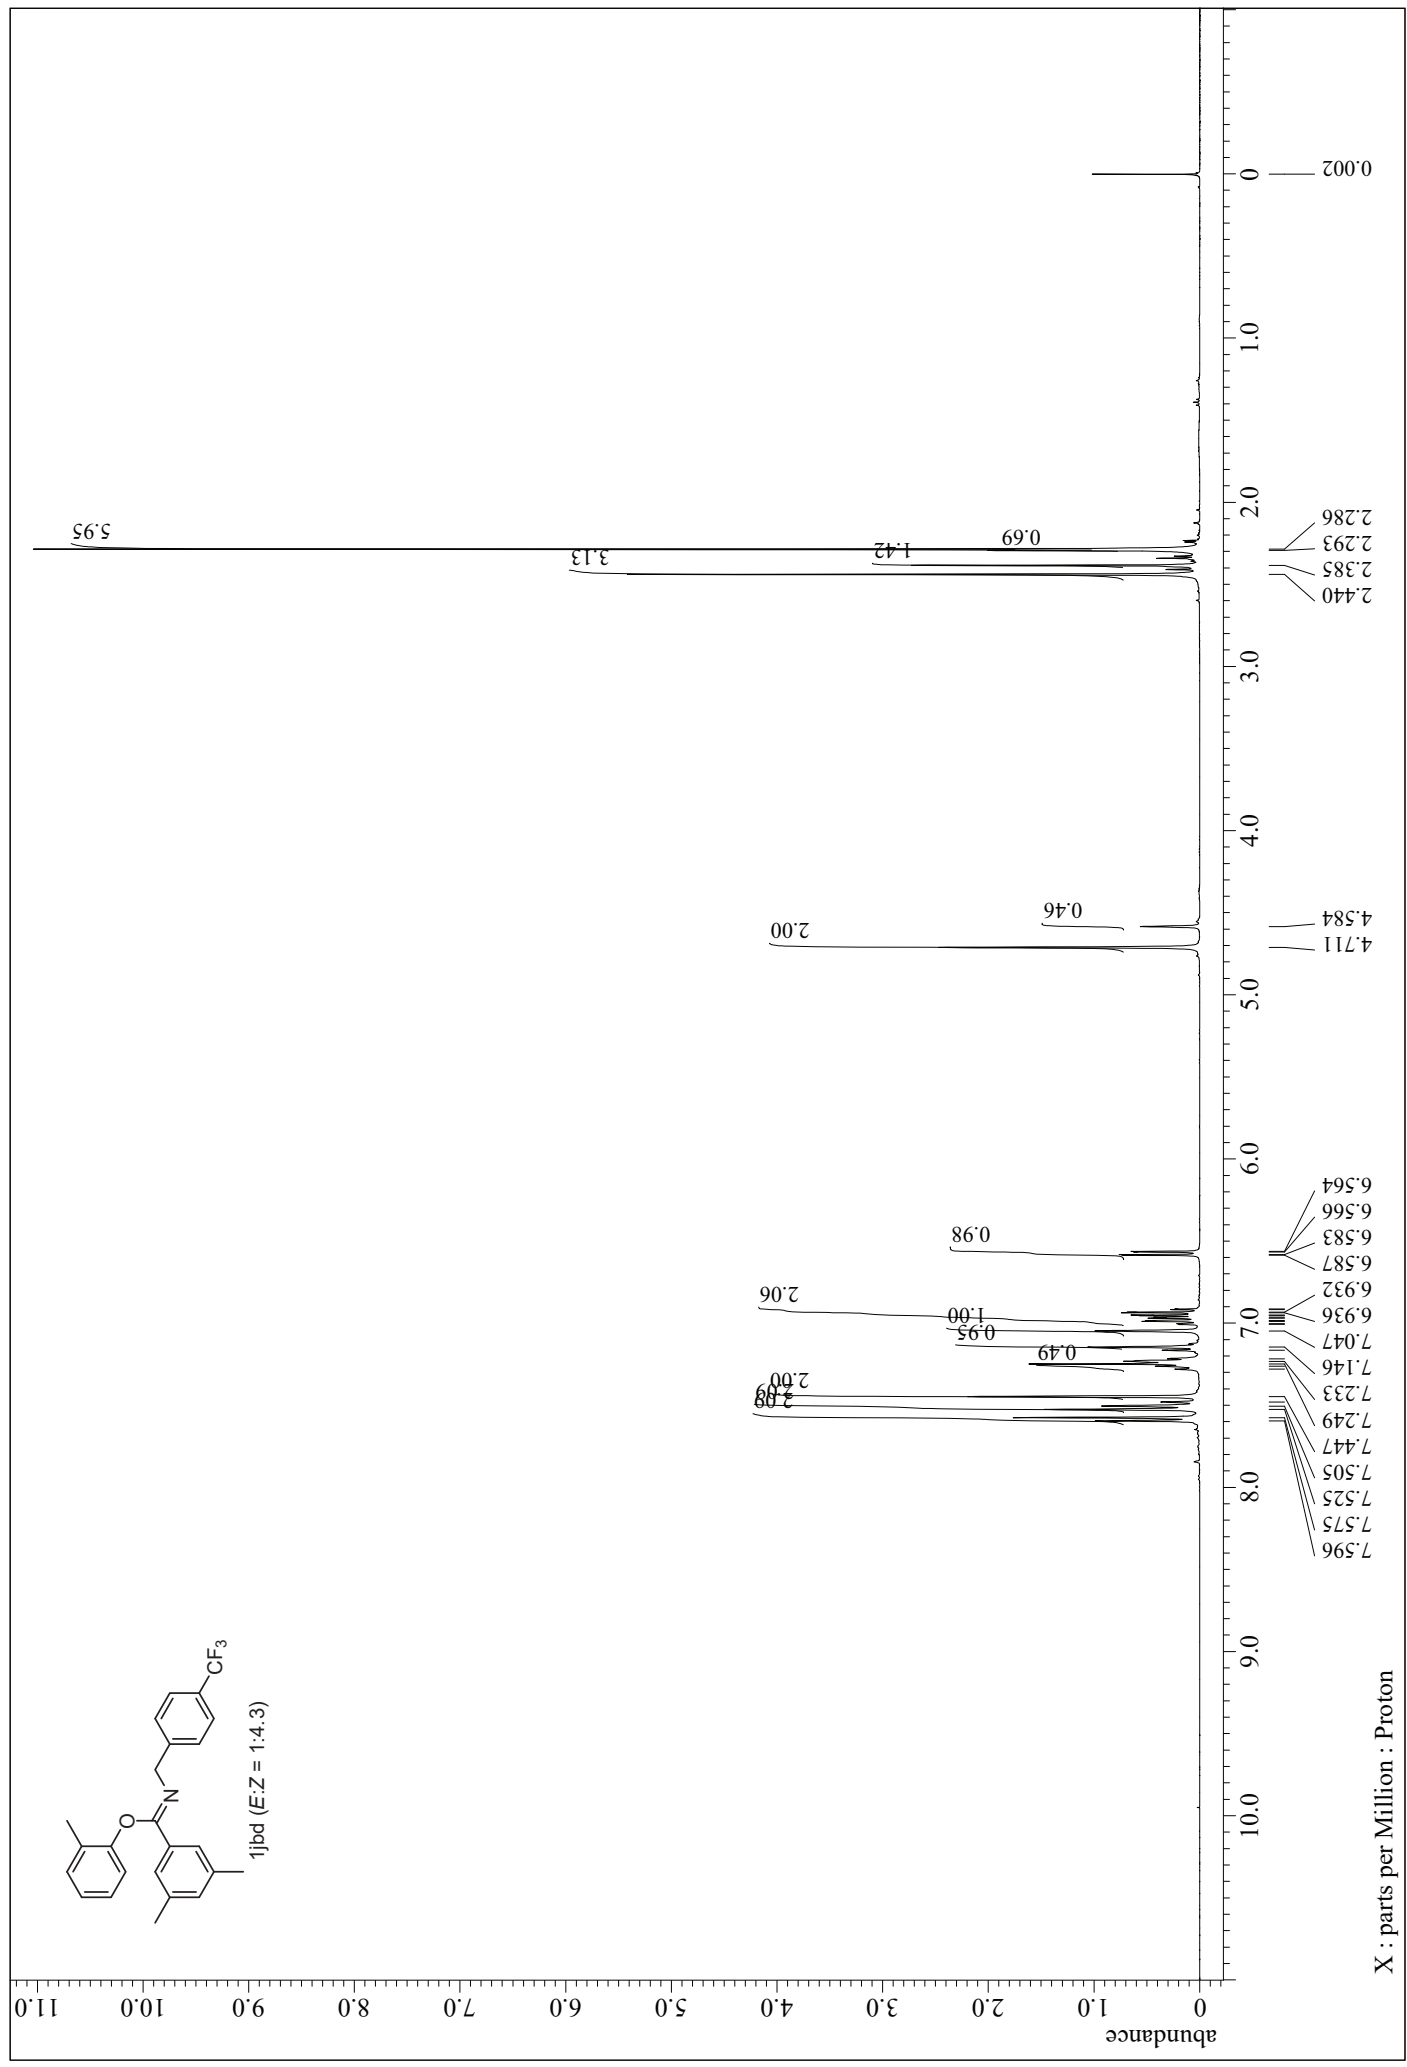

<sup>13</sup>C NMR (101 MHz, CDCl<sub>3</sub>)

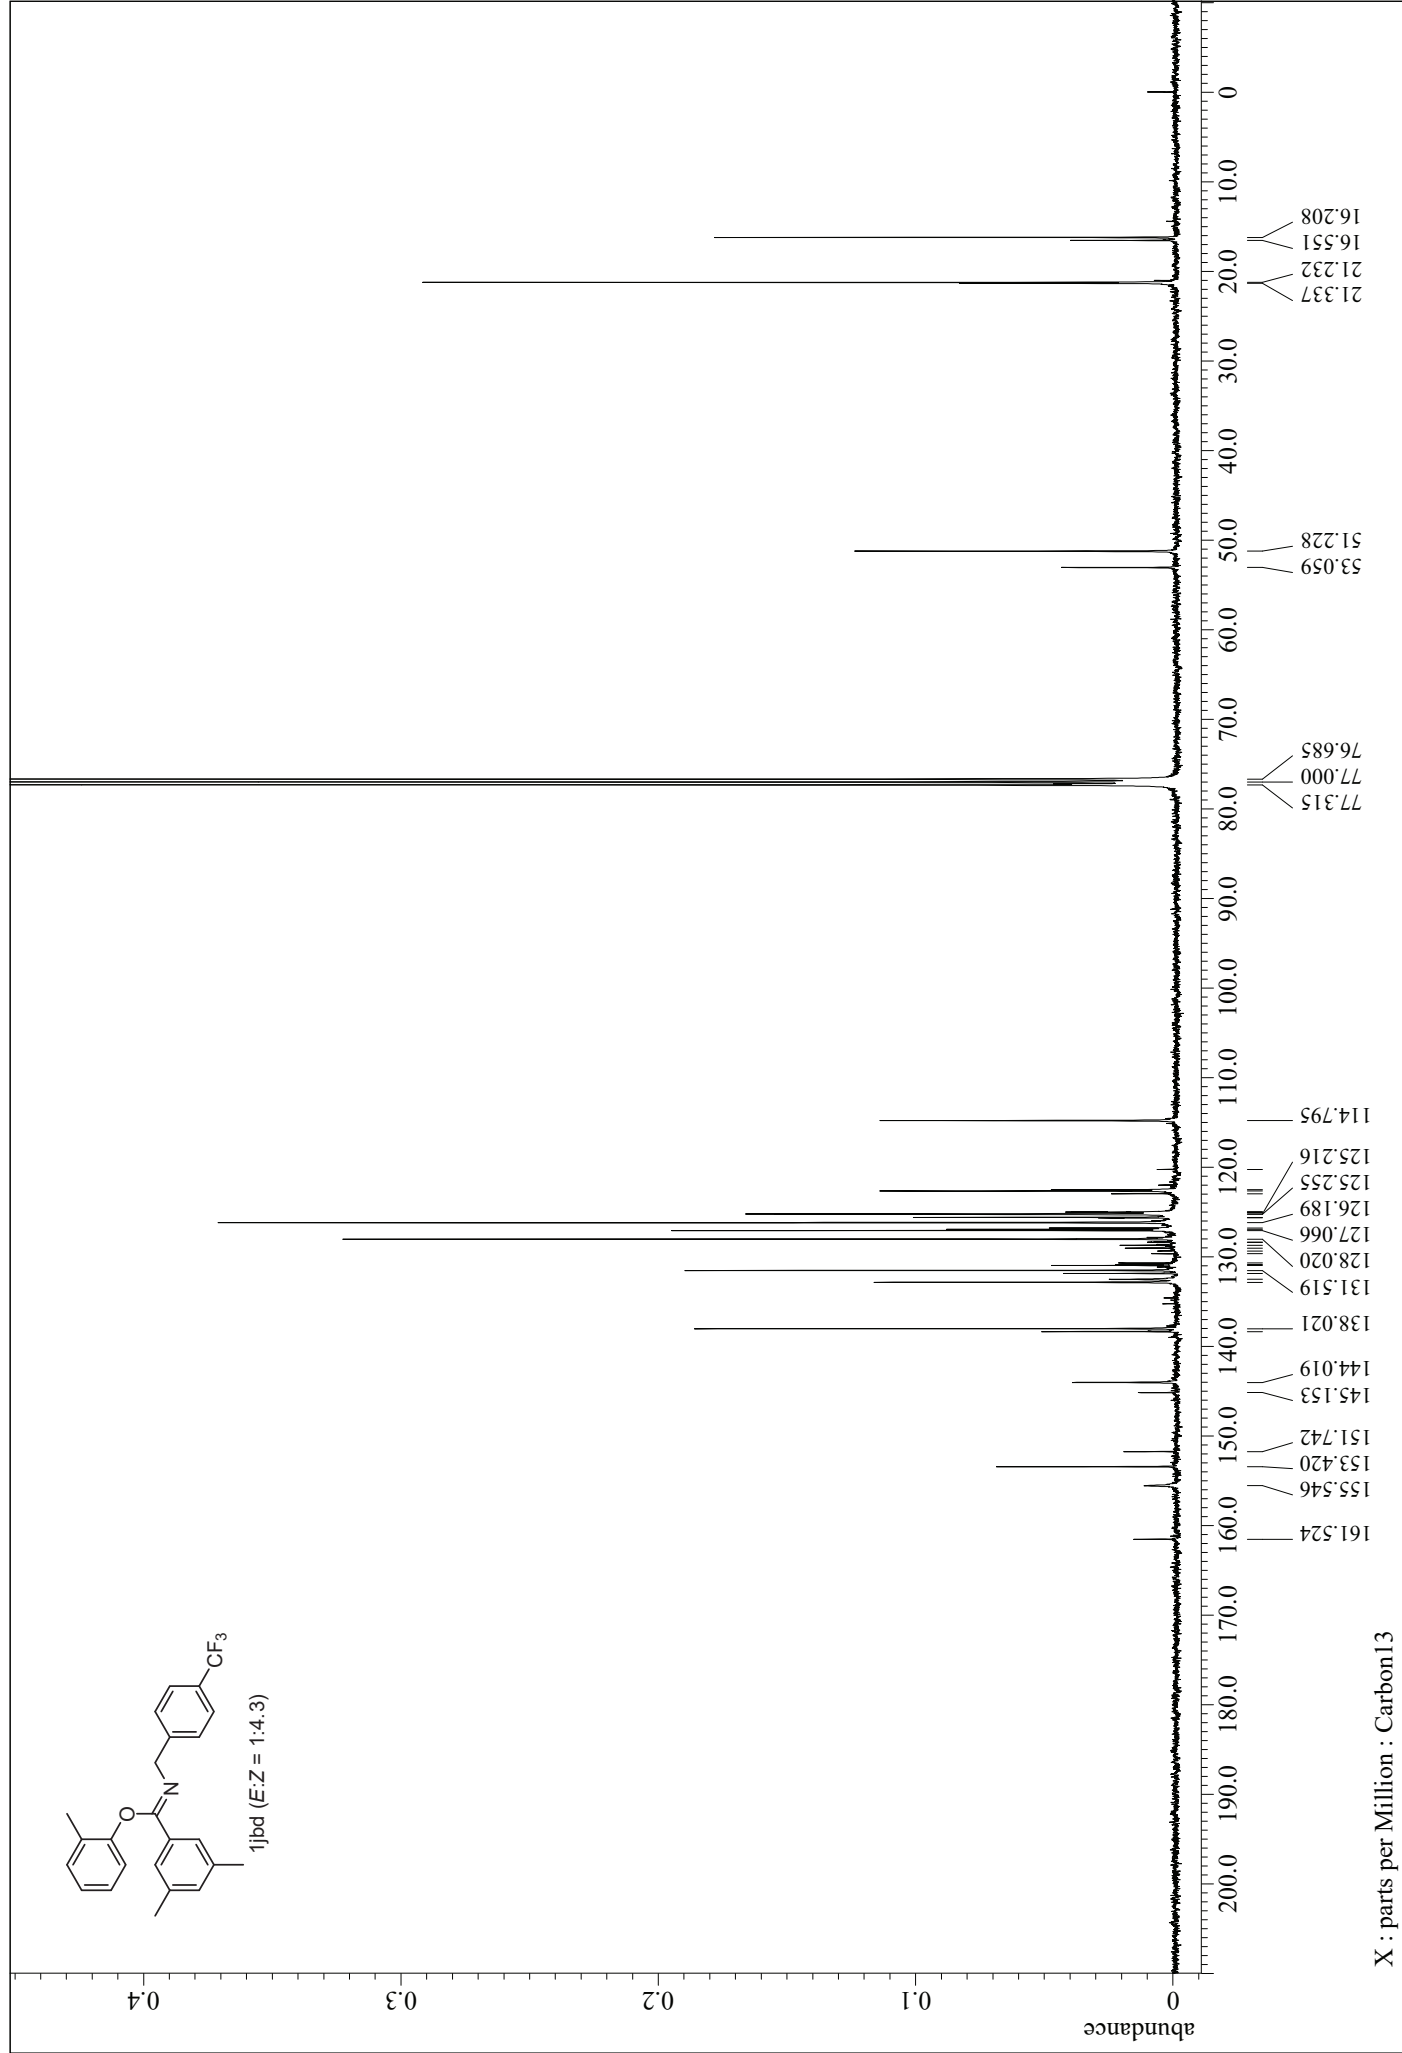

<sup>19</sup>F NMR (376 MHz, CDCl<sub>3</sub>)

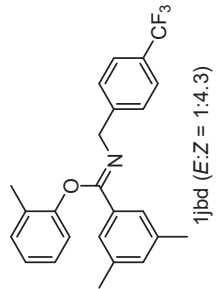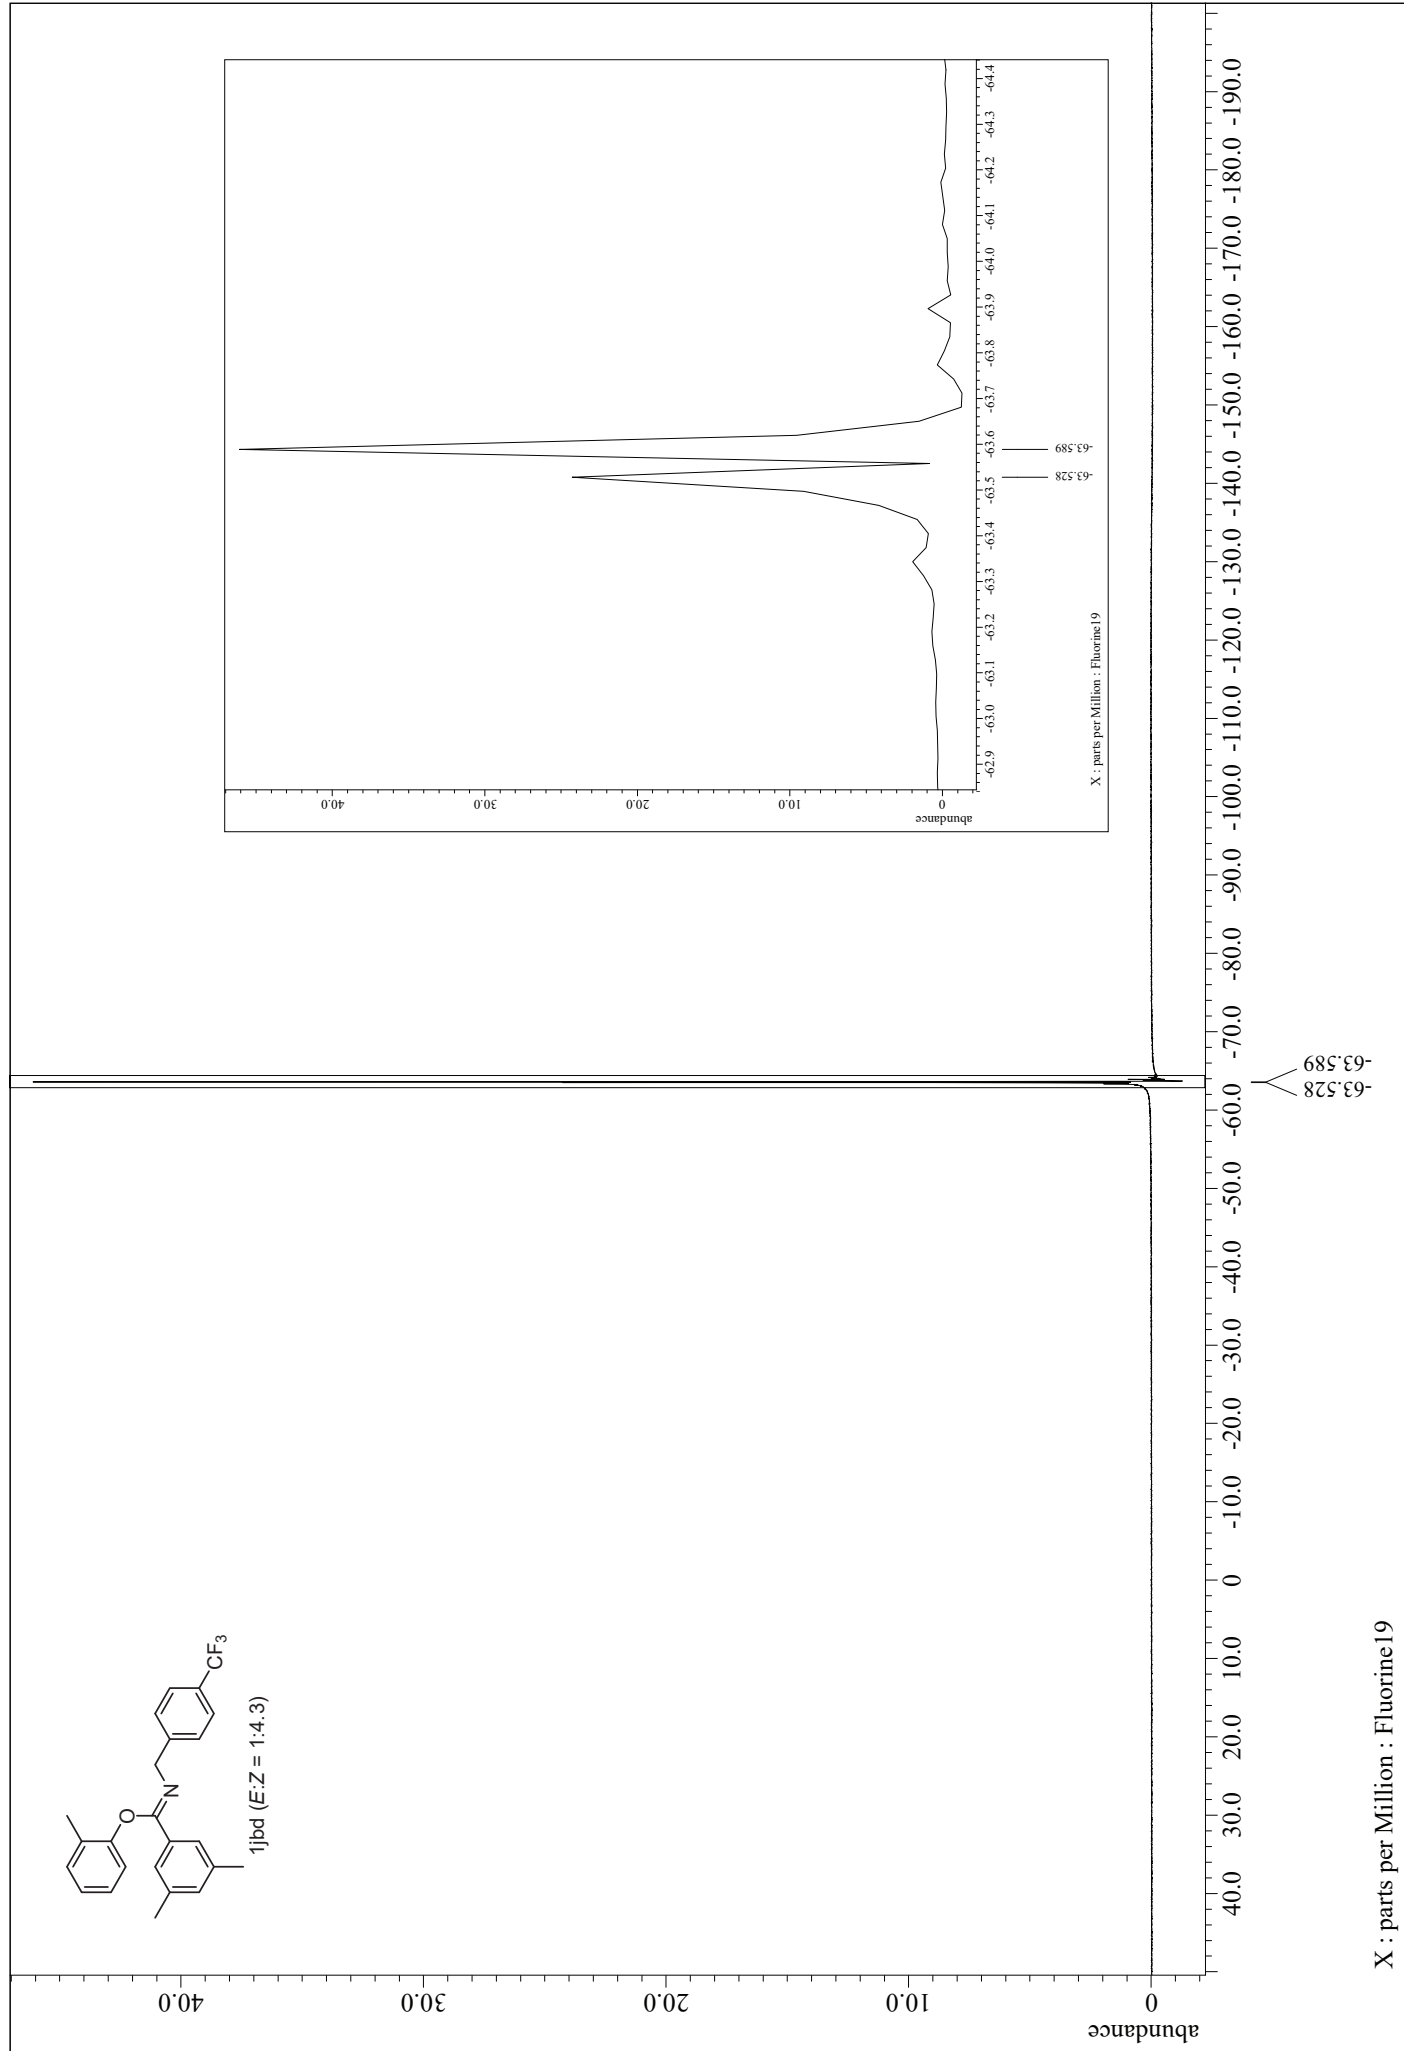

X : parts per Million : Fluorine 19



<sup>1</sup>H NMR (400 MHz, CDCl<sub>3</sub>)

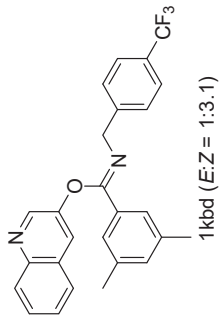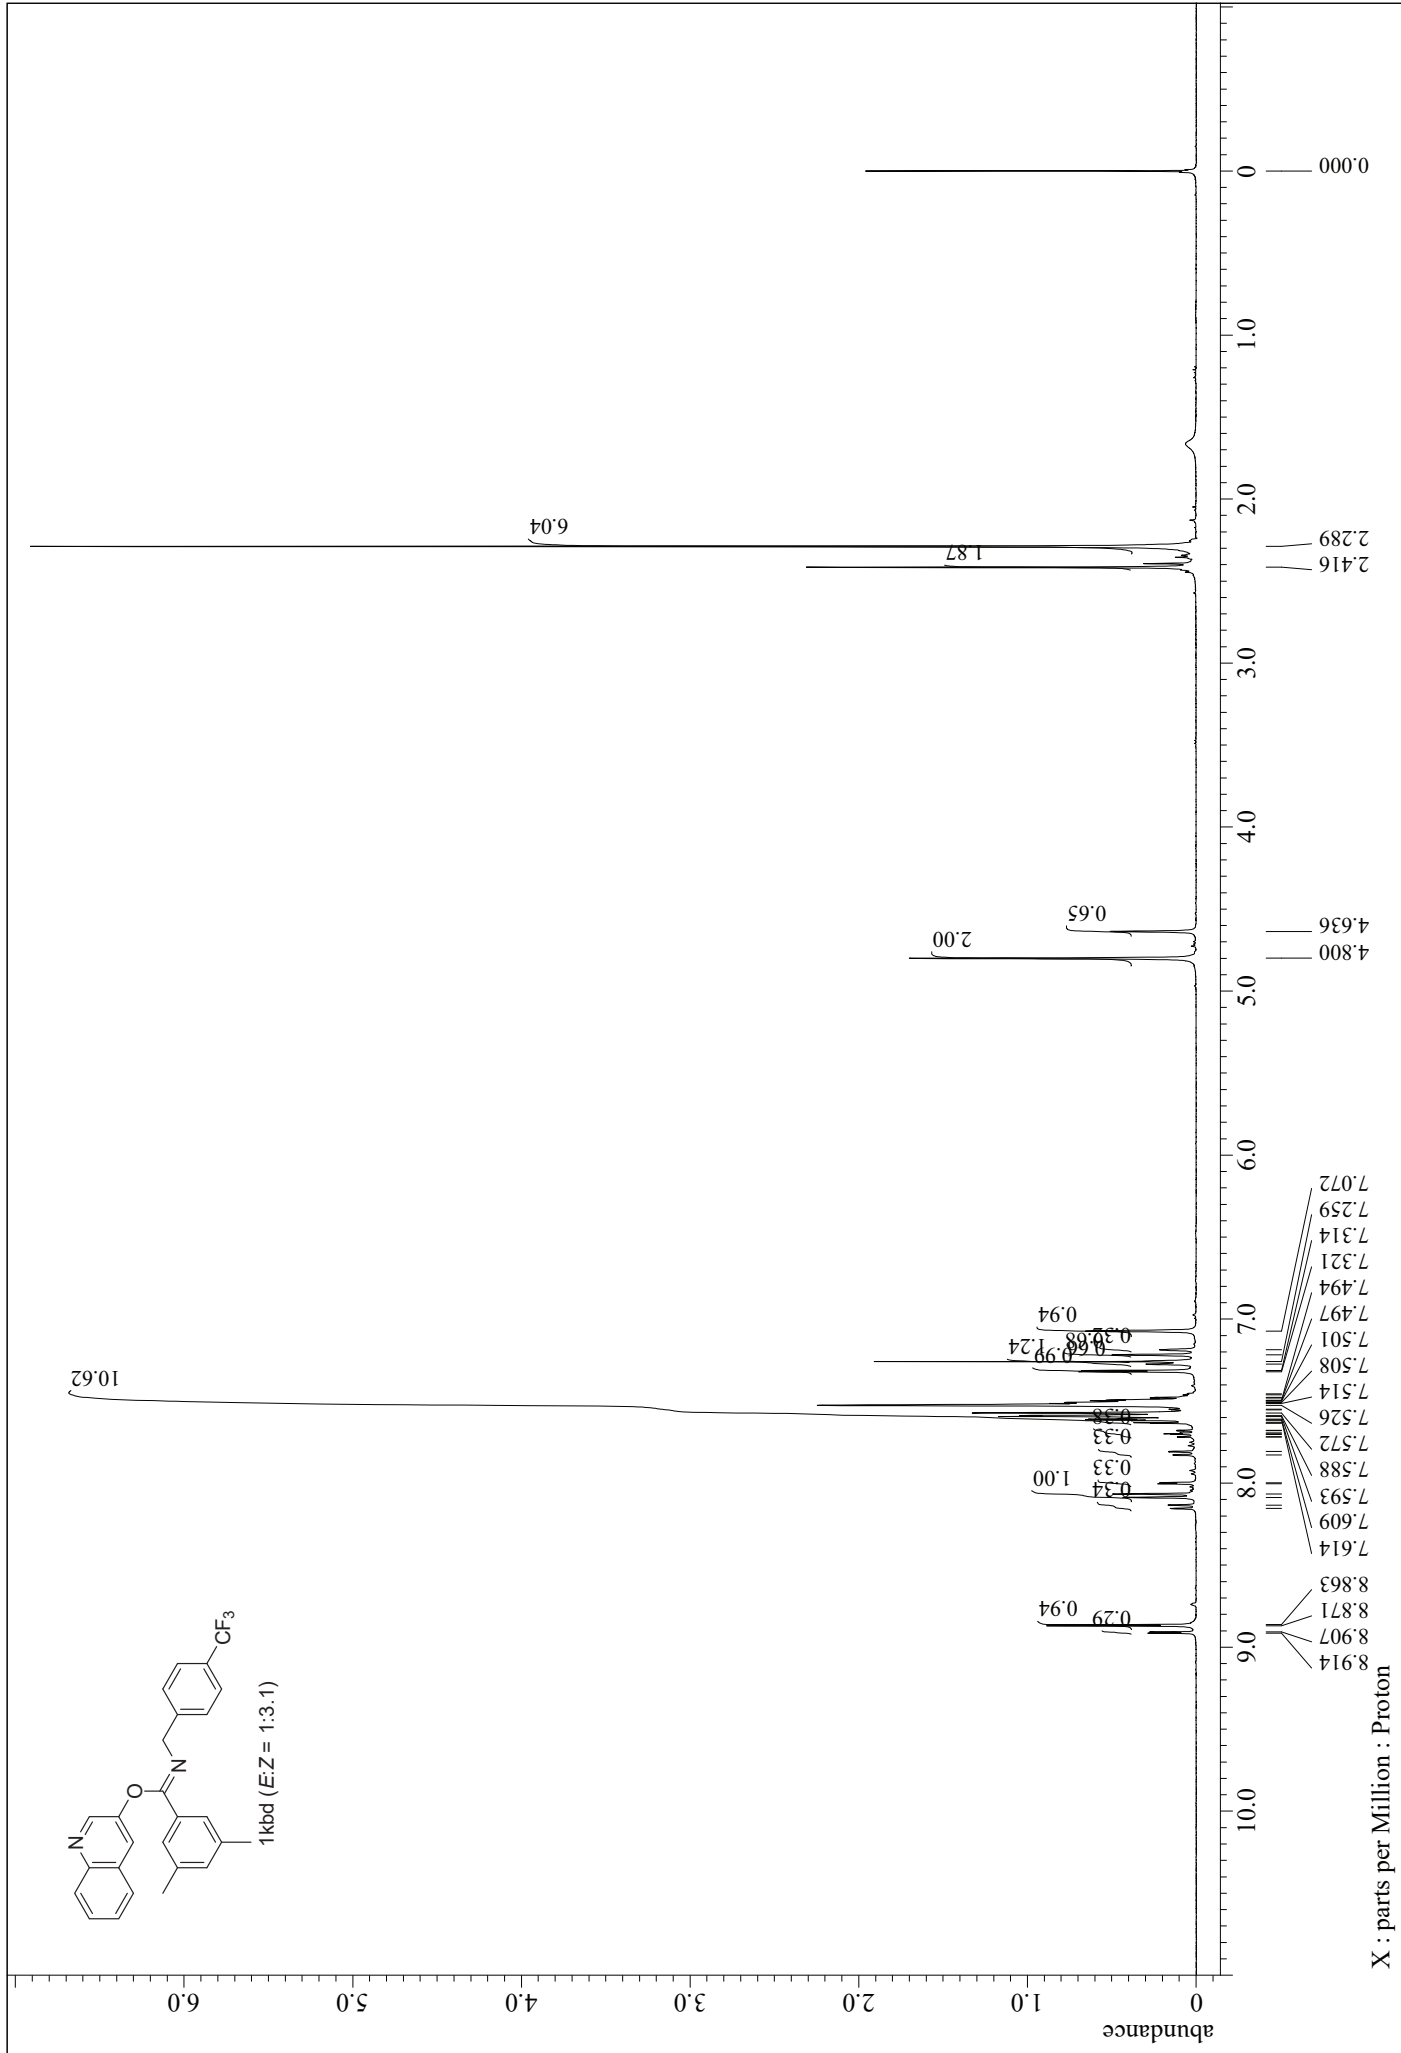

<sup>13</sup>C NMR (101 MHz, CDCl<sub>3</sub>)

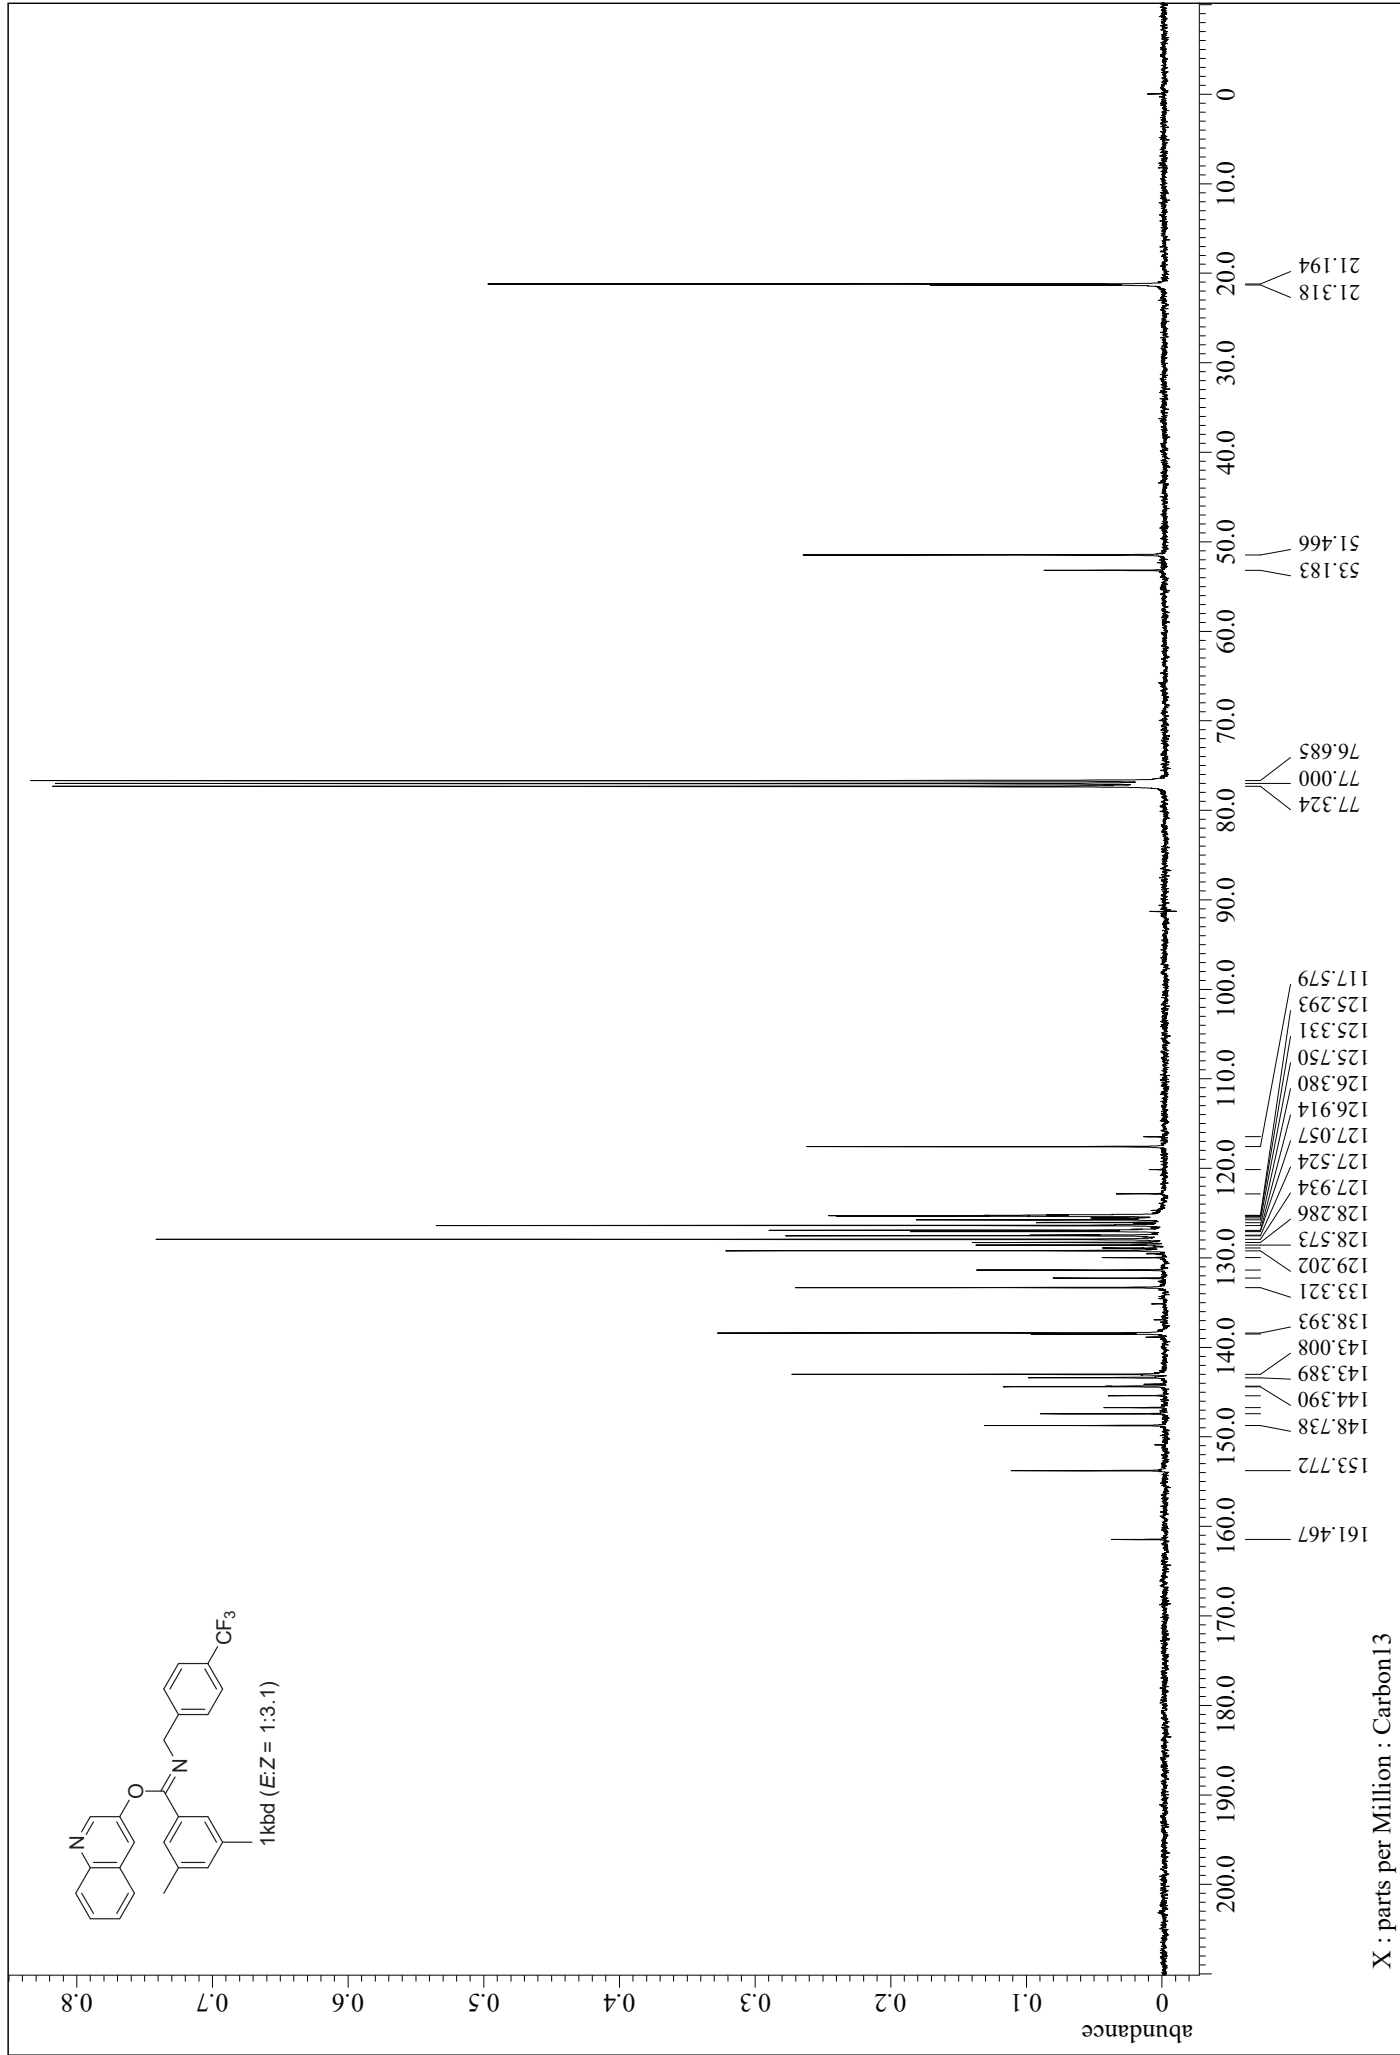

X : parts per Million : Carbon13

<sup>19</sup>F NMR (376 MHz, CDCl<sub>3</sub>)

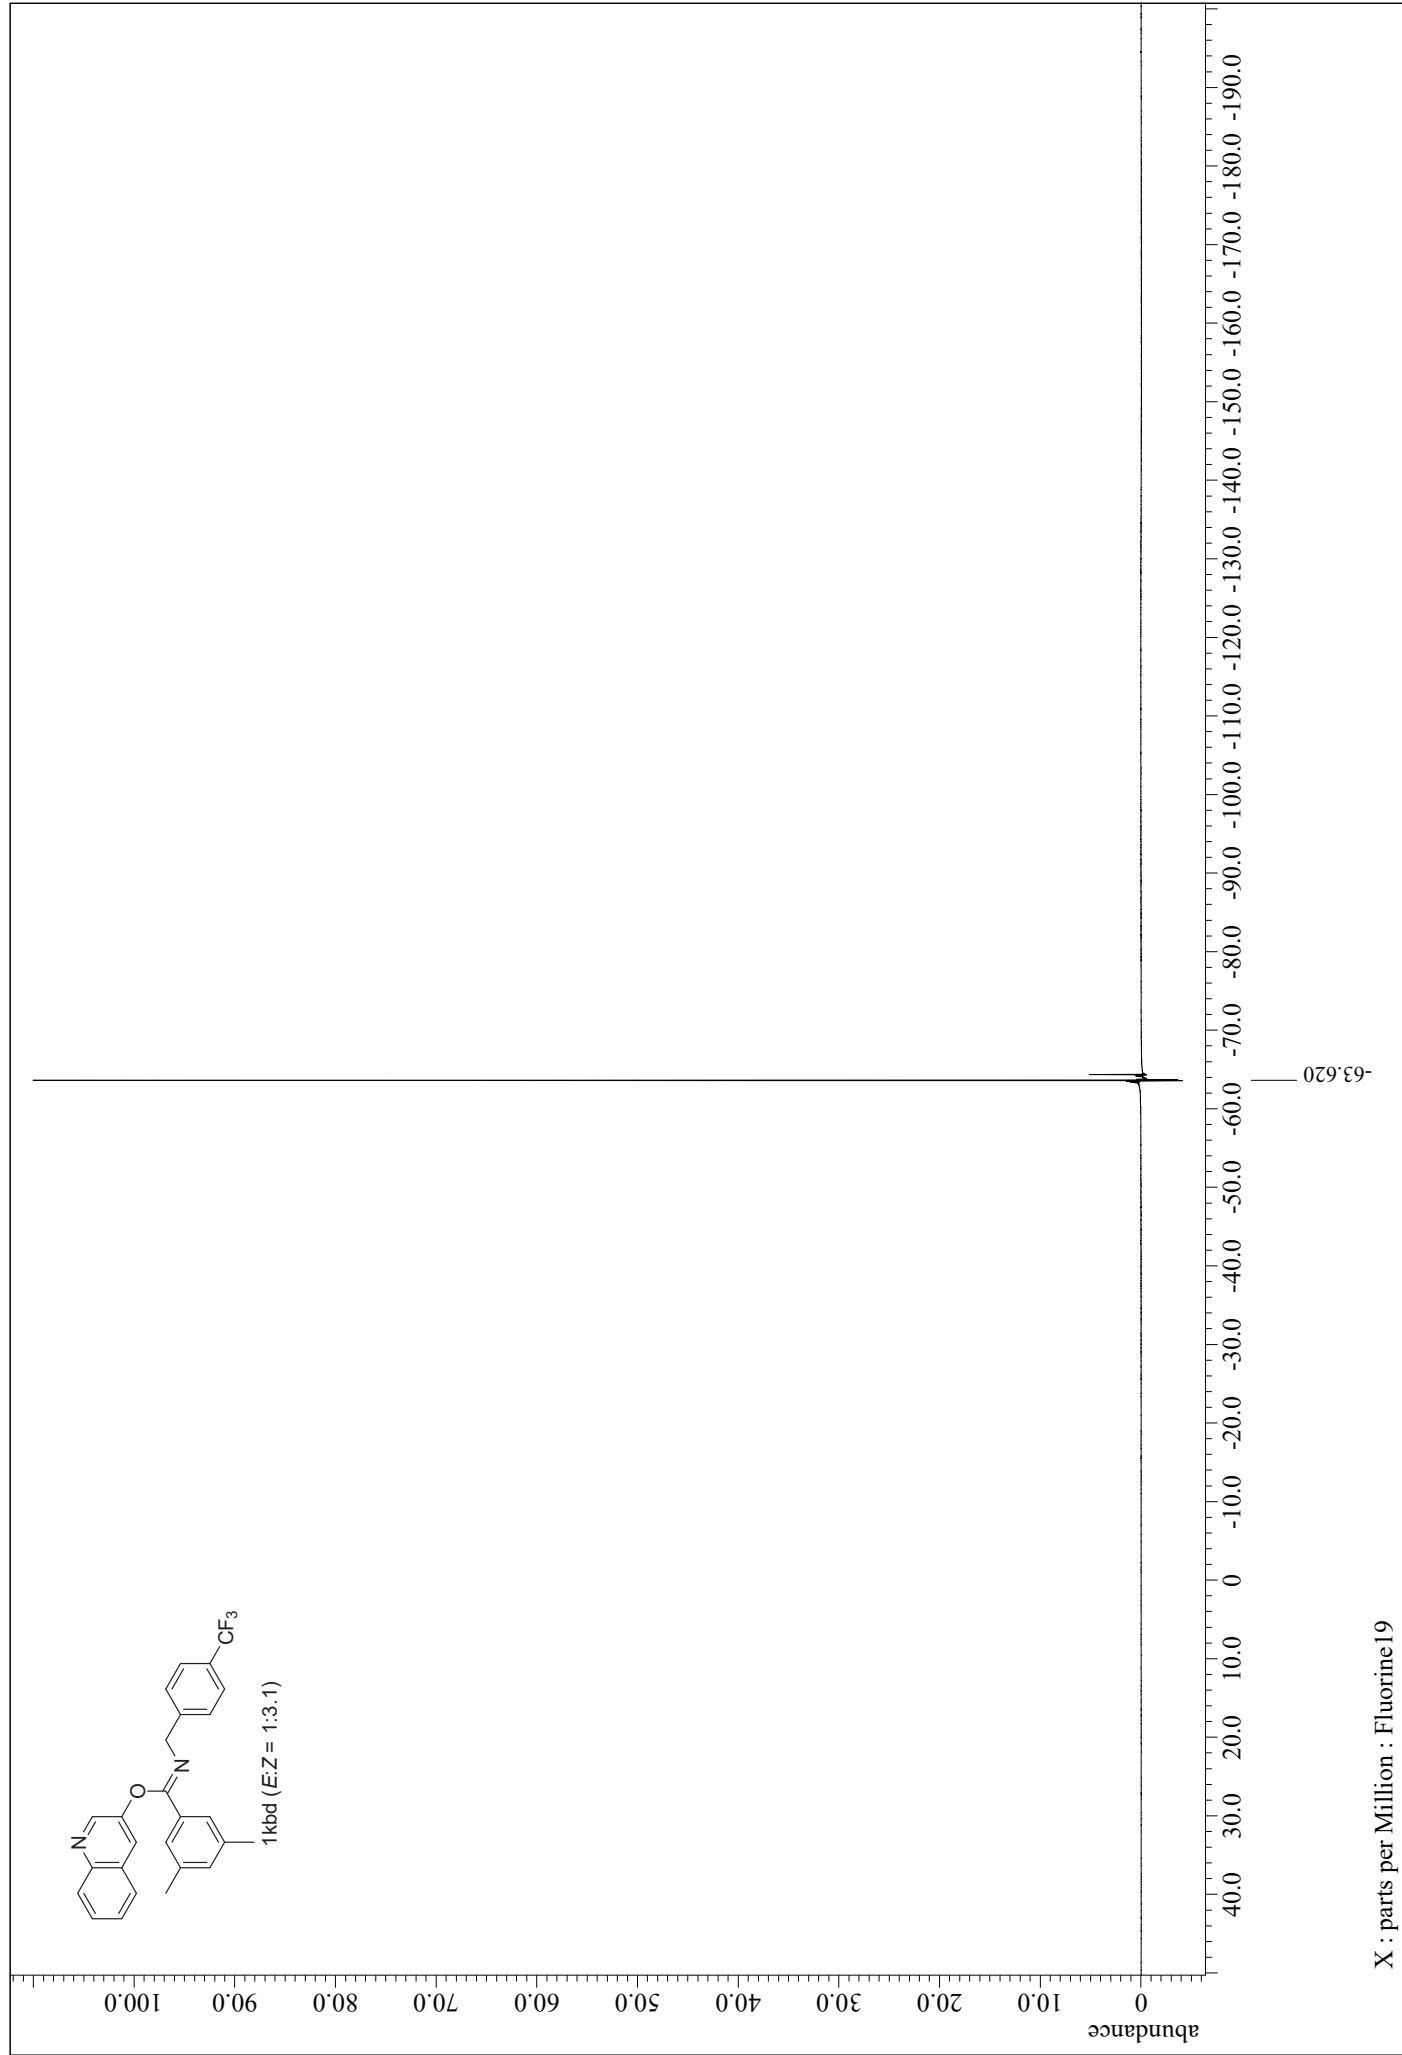

<sup>1</sup>H NMR (400 MHz, CDCl<sub>3</sub>)

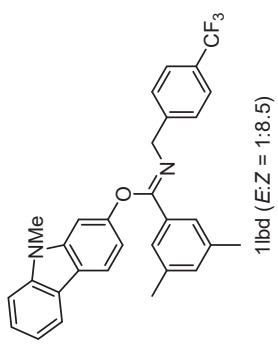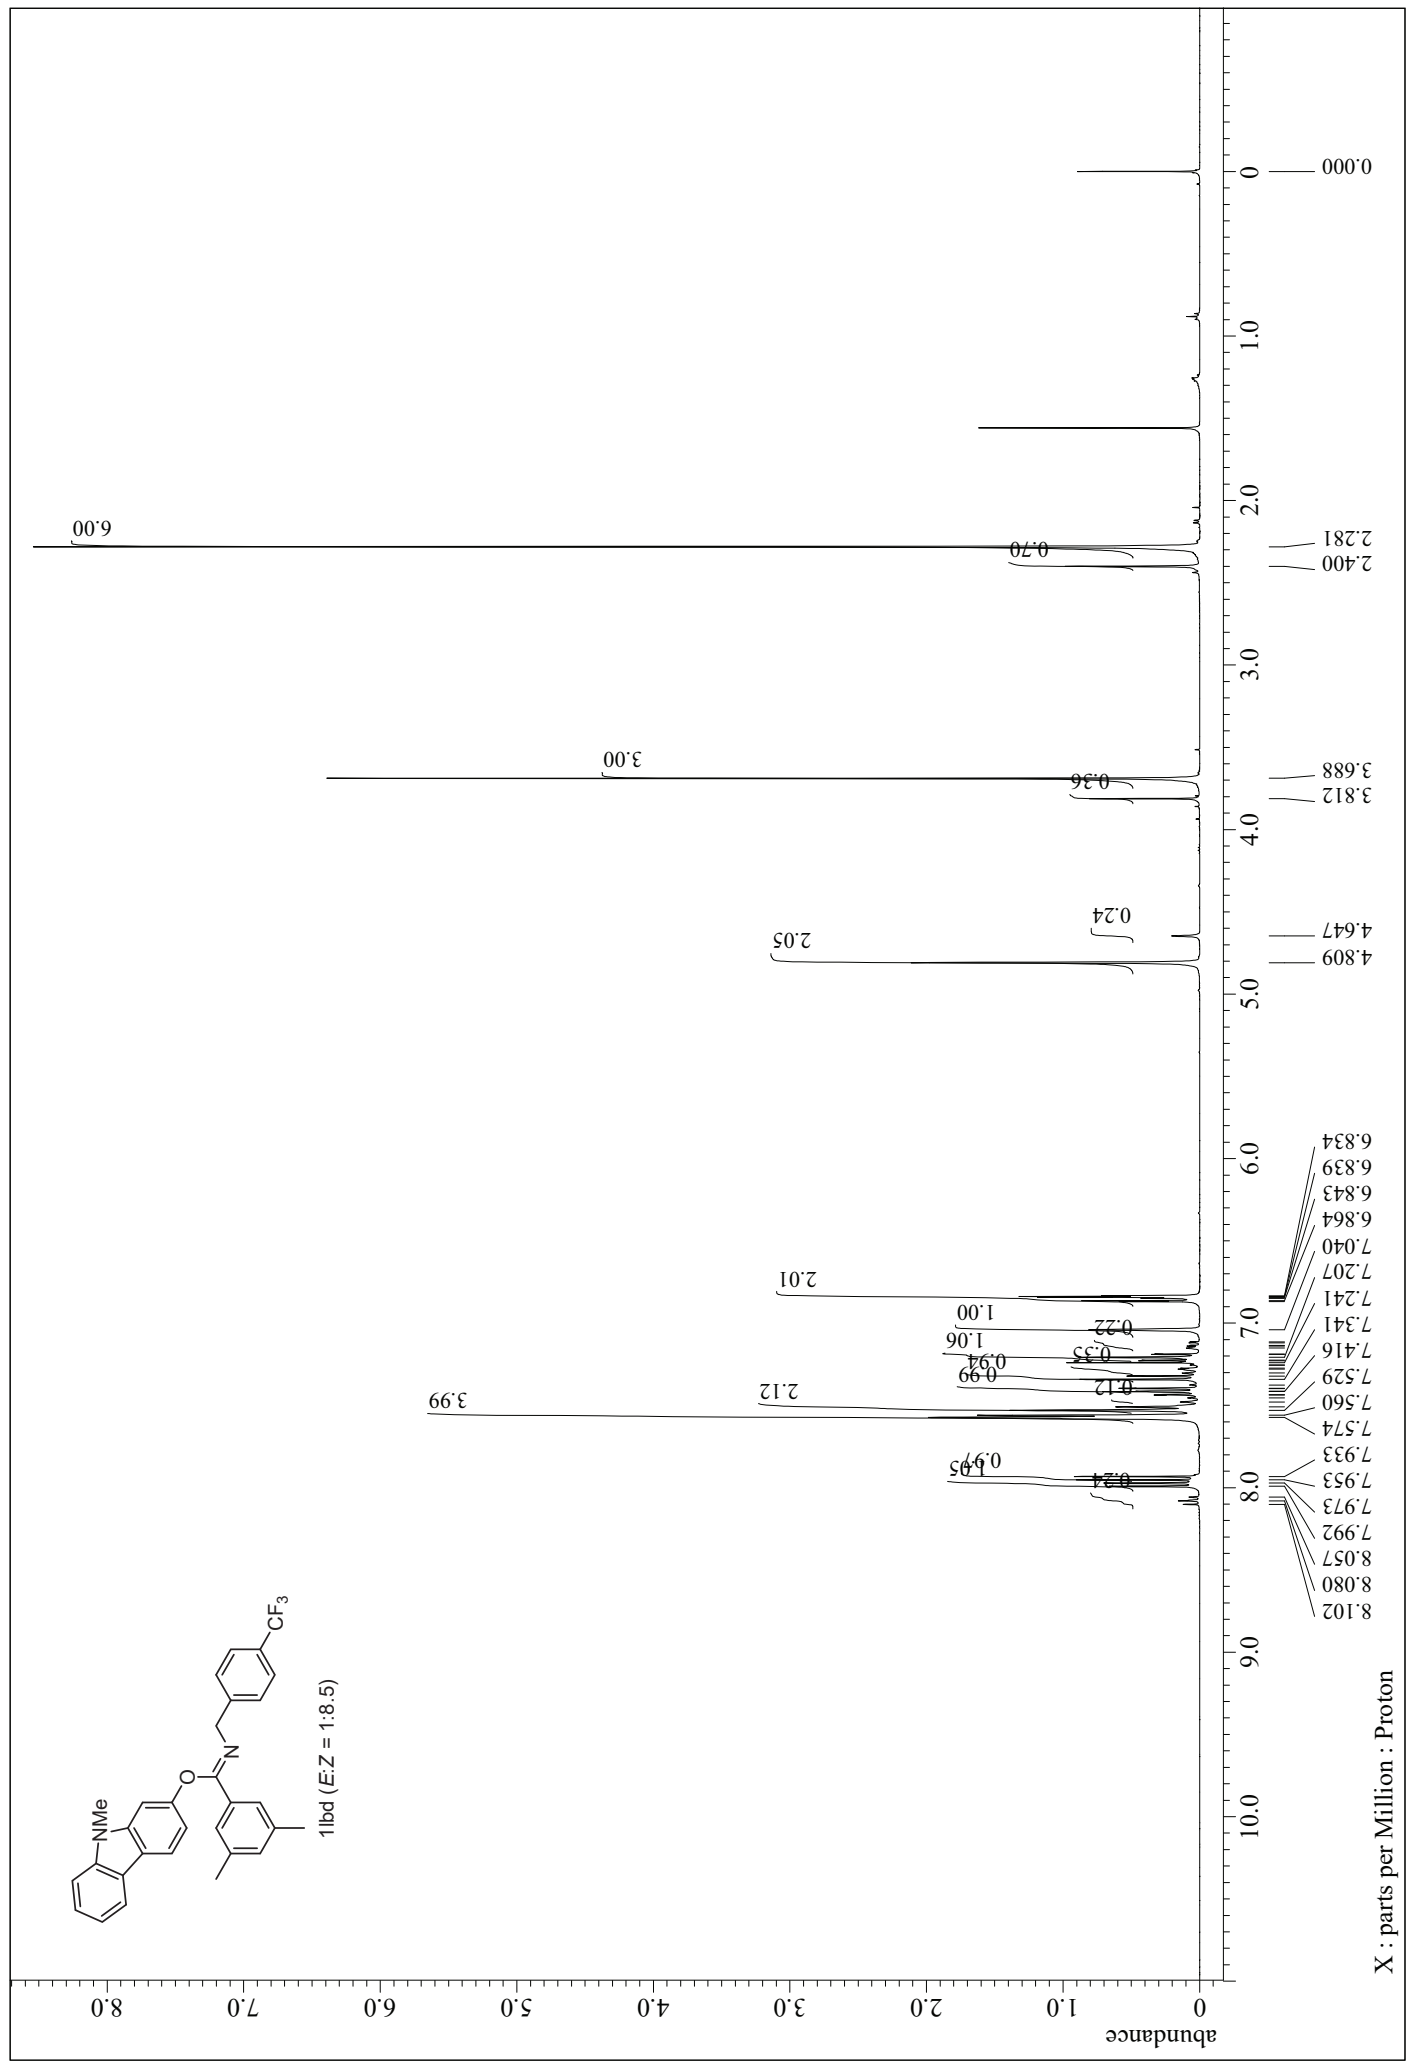

<sup>13</sup>C NMR (101 MHz, CDCl<sub>3</sub>)

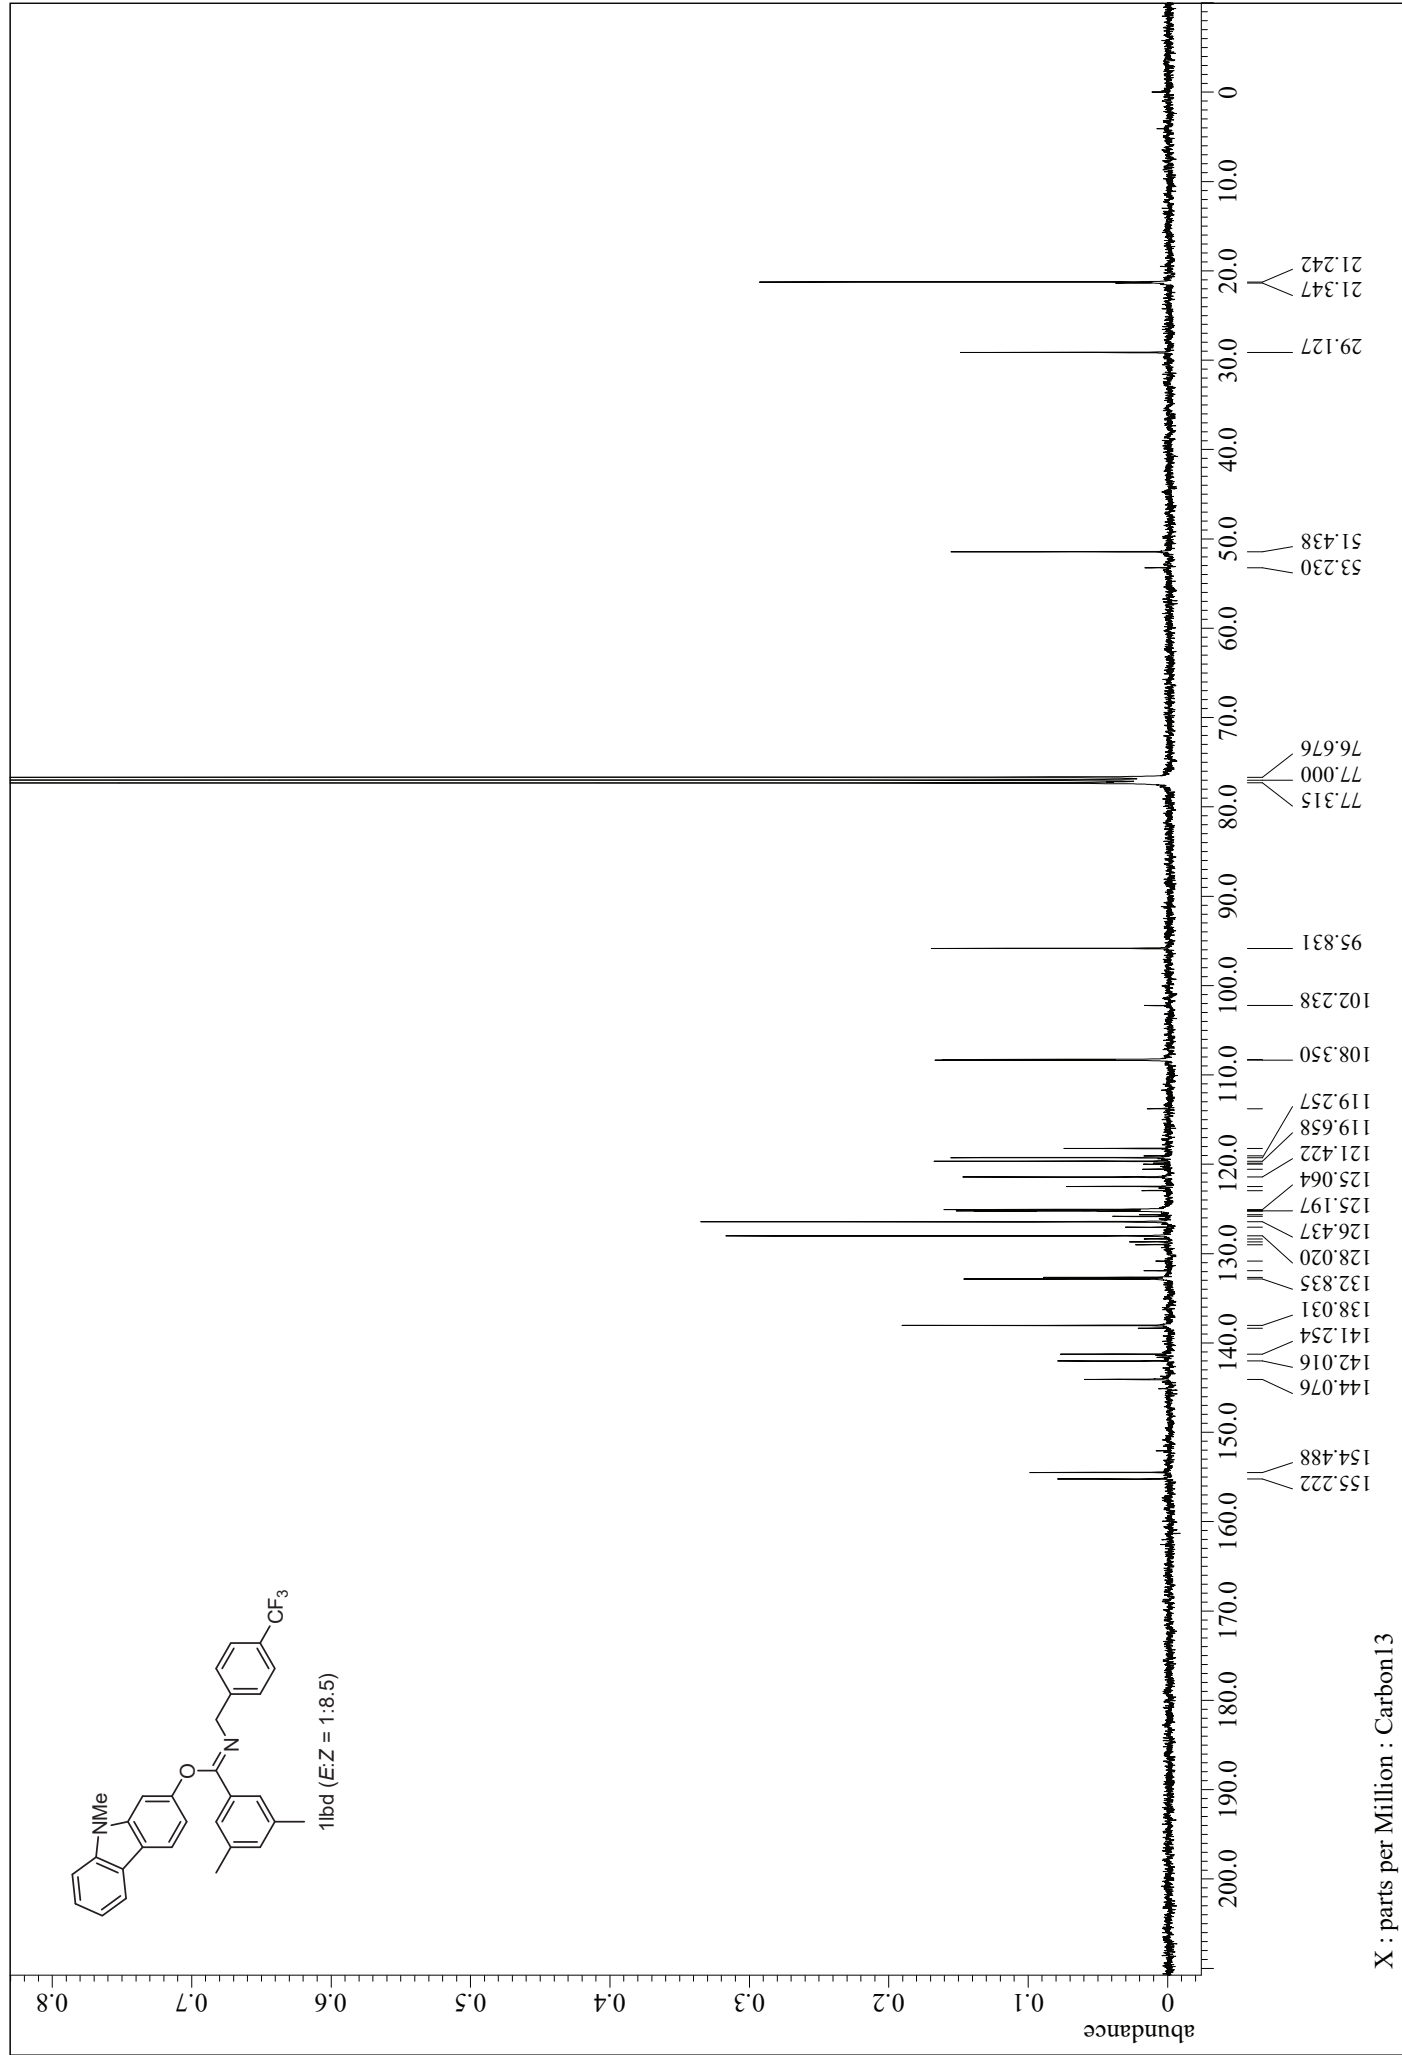

abundance

200.0 190.0 180.0 170.0 160.0 150.0 140.0 130.0 120.0 110.0 100.0 90.0 80.0 70.0 60.0 50.0 40.0 30.0 20.0 10.0 0

155.222  
154.488  
144.076  
142.016  
141.254  
138.031  
132.835  
128.020  
126.437  
125.197  
125.064  
121.422  
119.658  
119.257  
108.350  
102.238  
95.831  
77.315  
77.000  
76.676  
53.230  
51.438  
29.127  
21.347  
21.242

X : parts per Million : Carbon13

<sup>19</sup>F NMR (376 MHz, CDCl<sub>3</sub>)

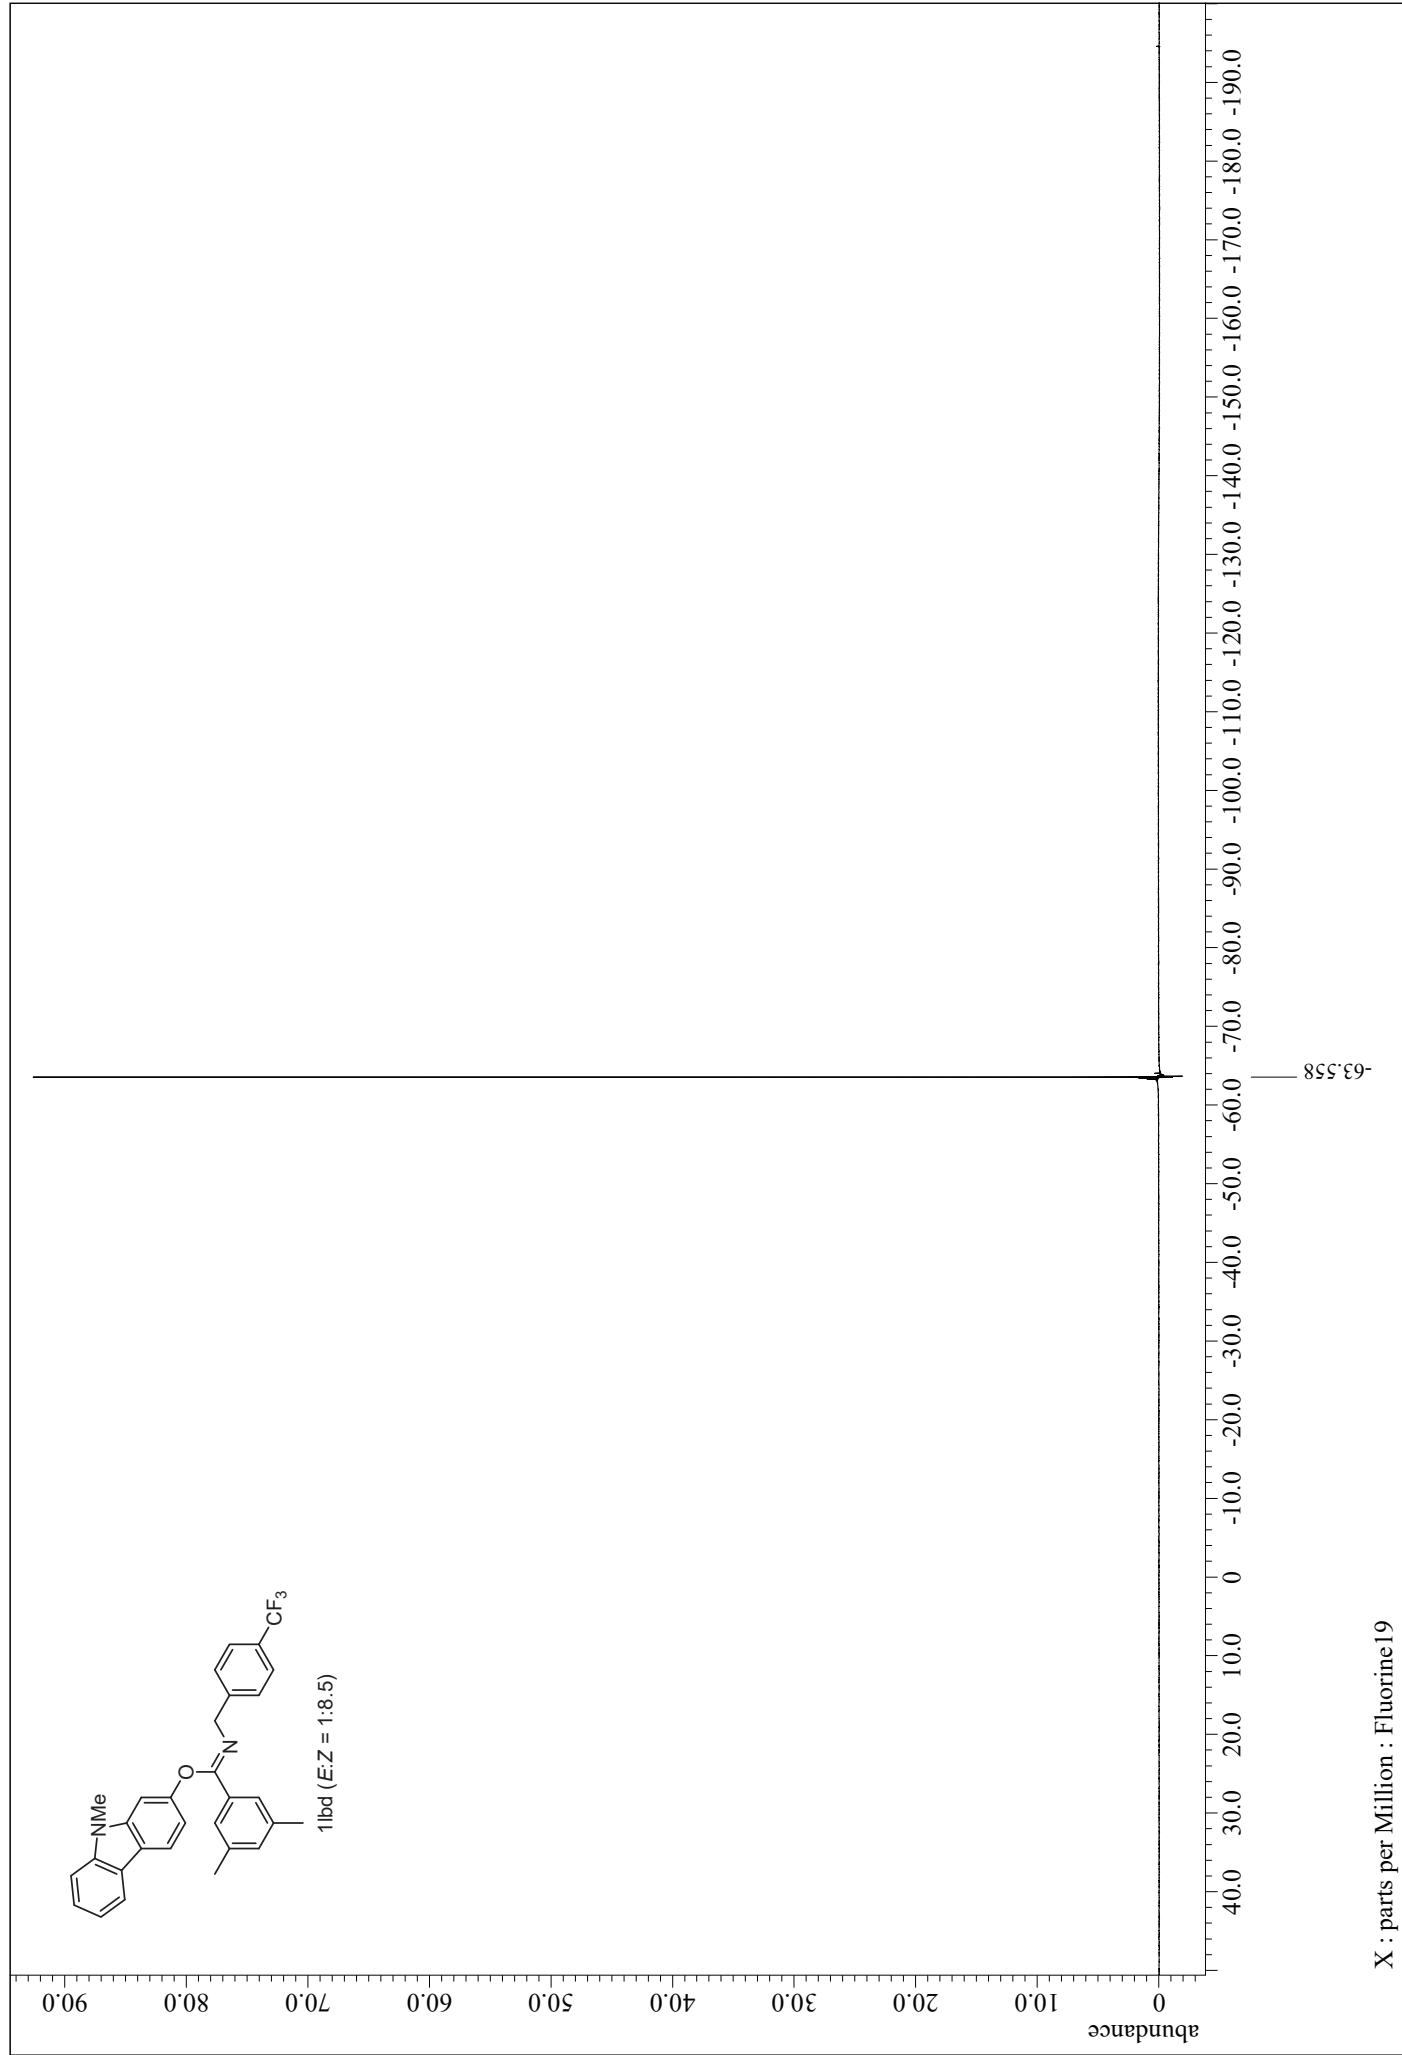

X : parts per Million : Fluorine 19

<sup>1</sup>H NMR (400 MHz, CDCl<sub>3</sub>)

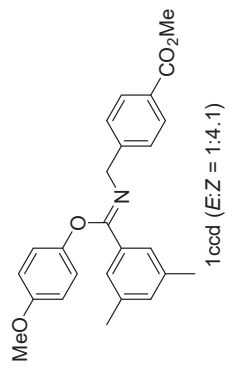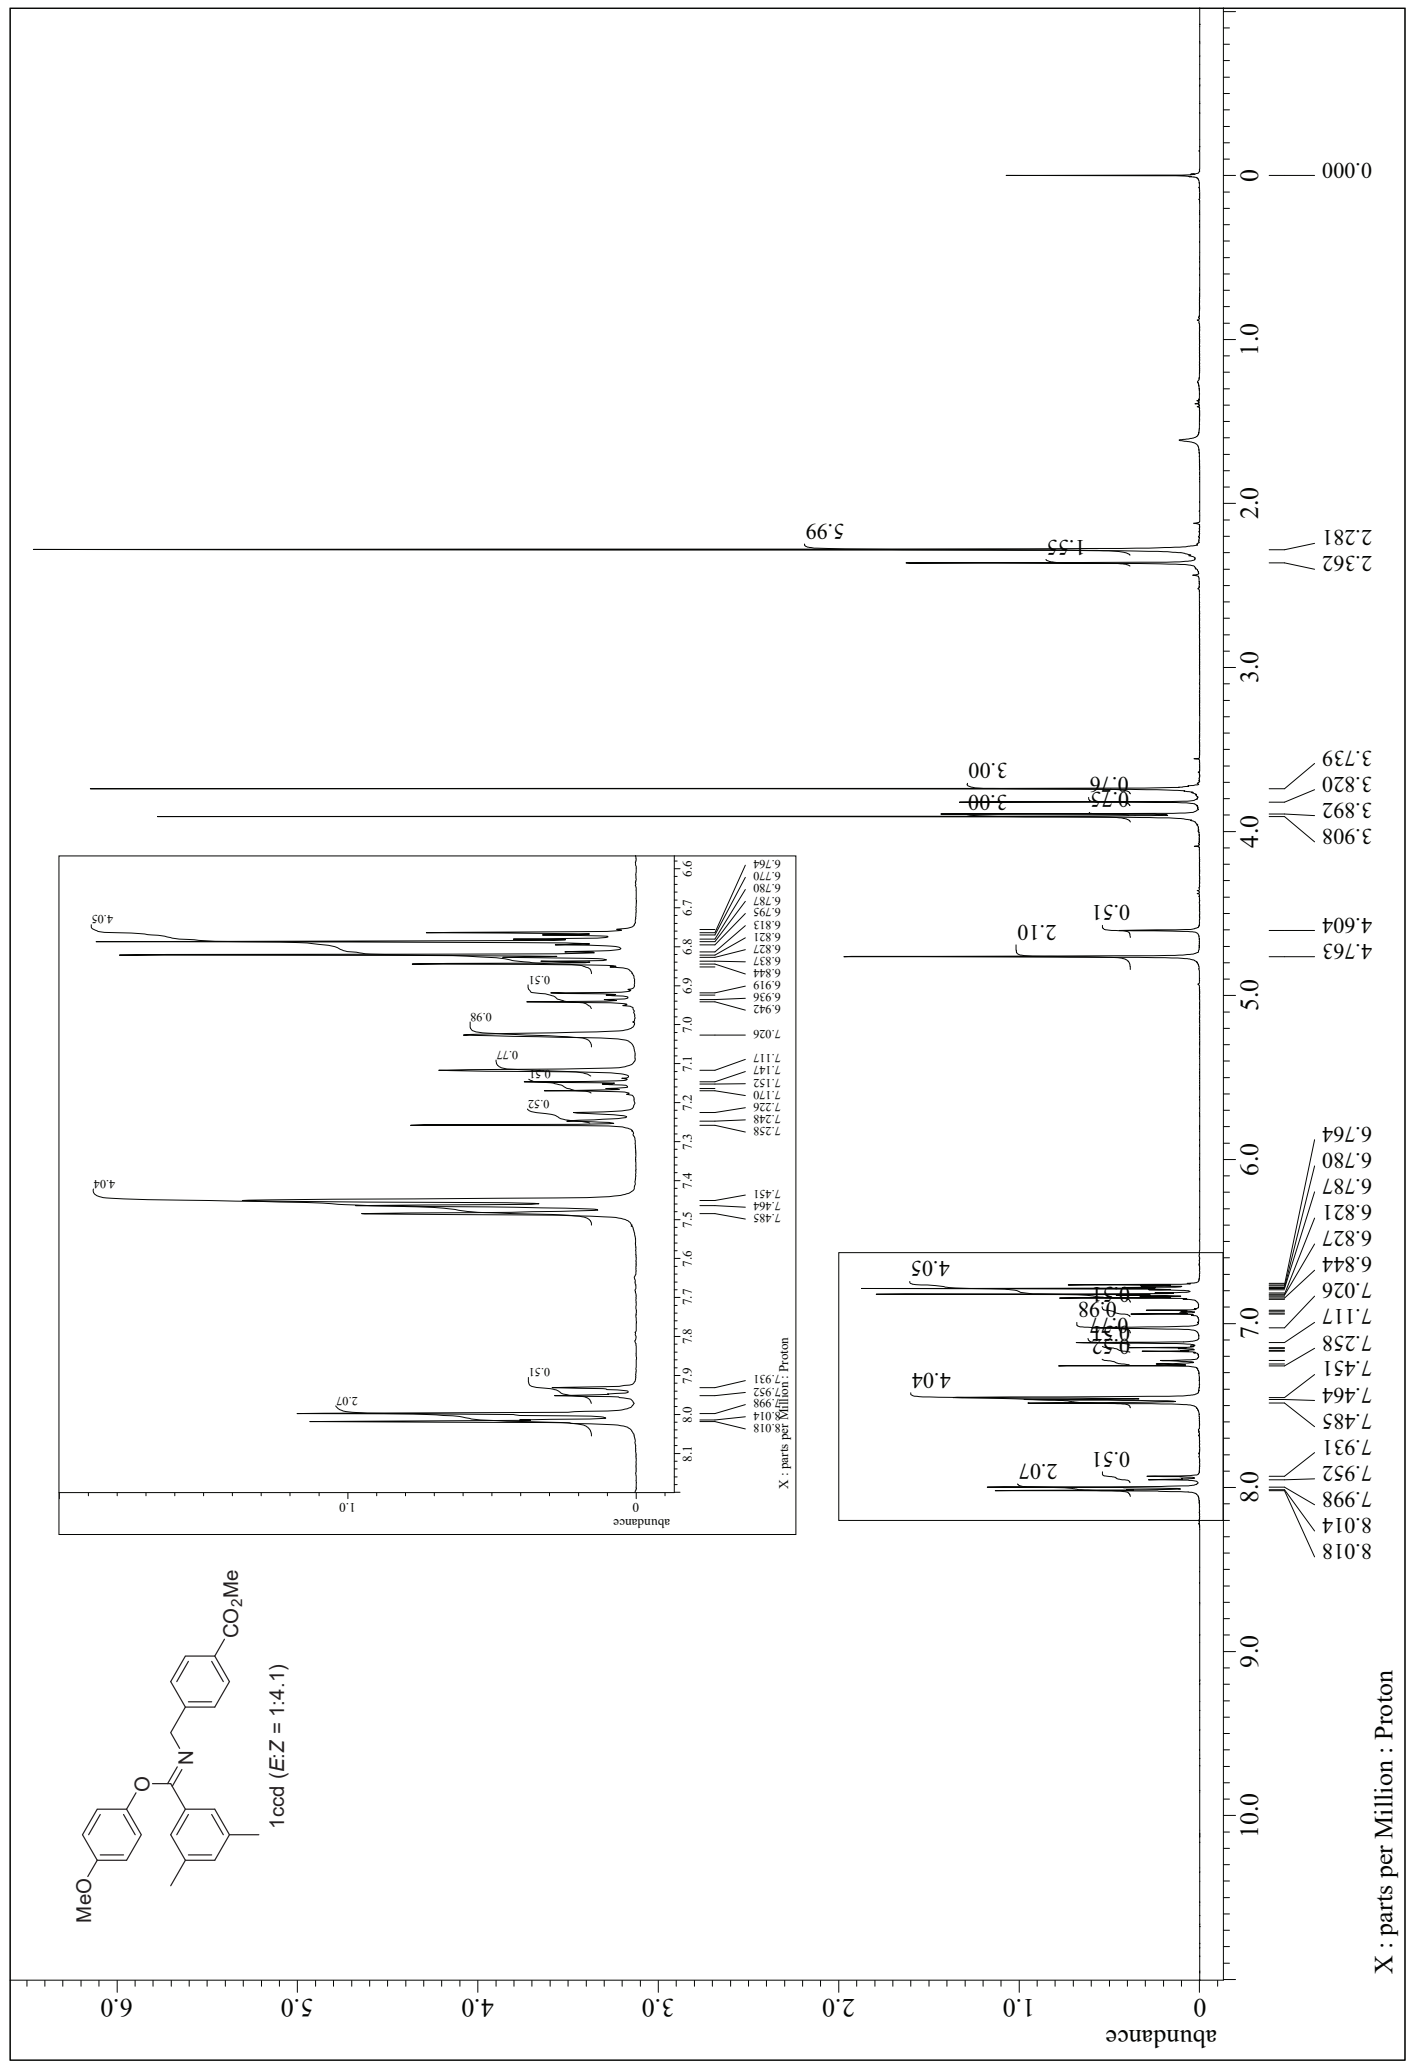

X : parts per Million : Proton

<sup>13</sup>C NMR (101 MHz, CDCl<sub>3</sub>)

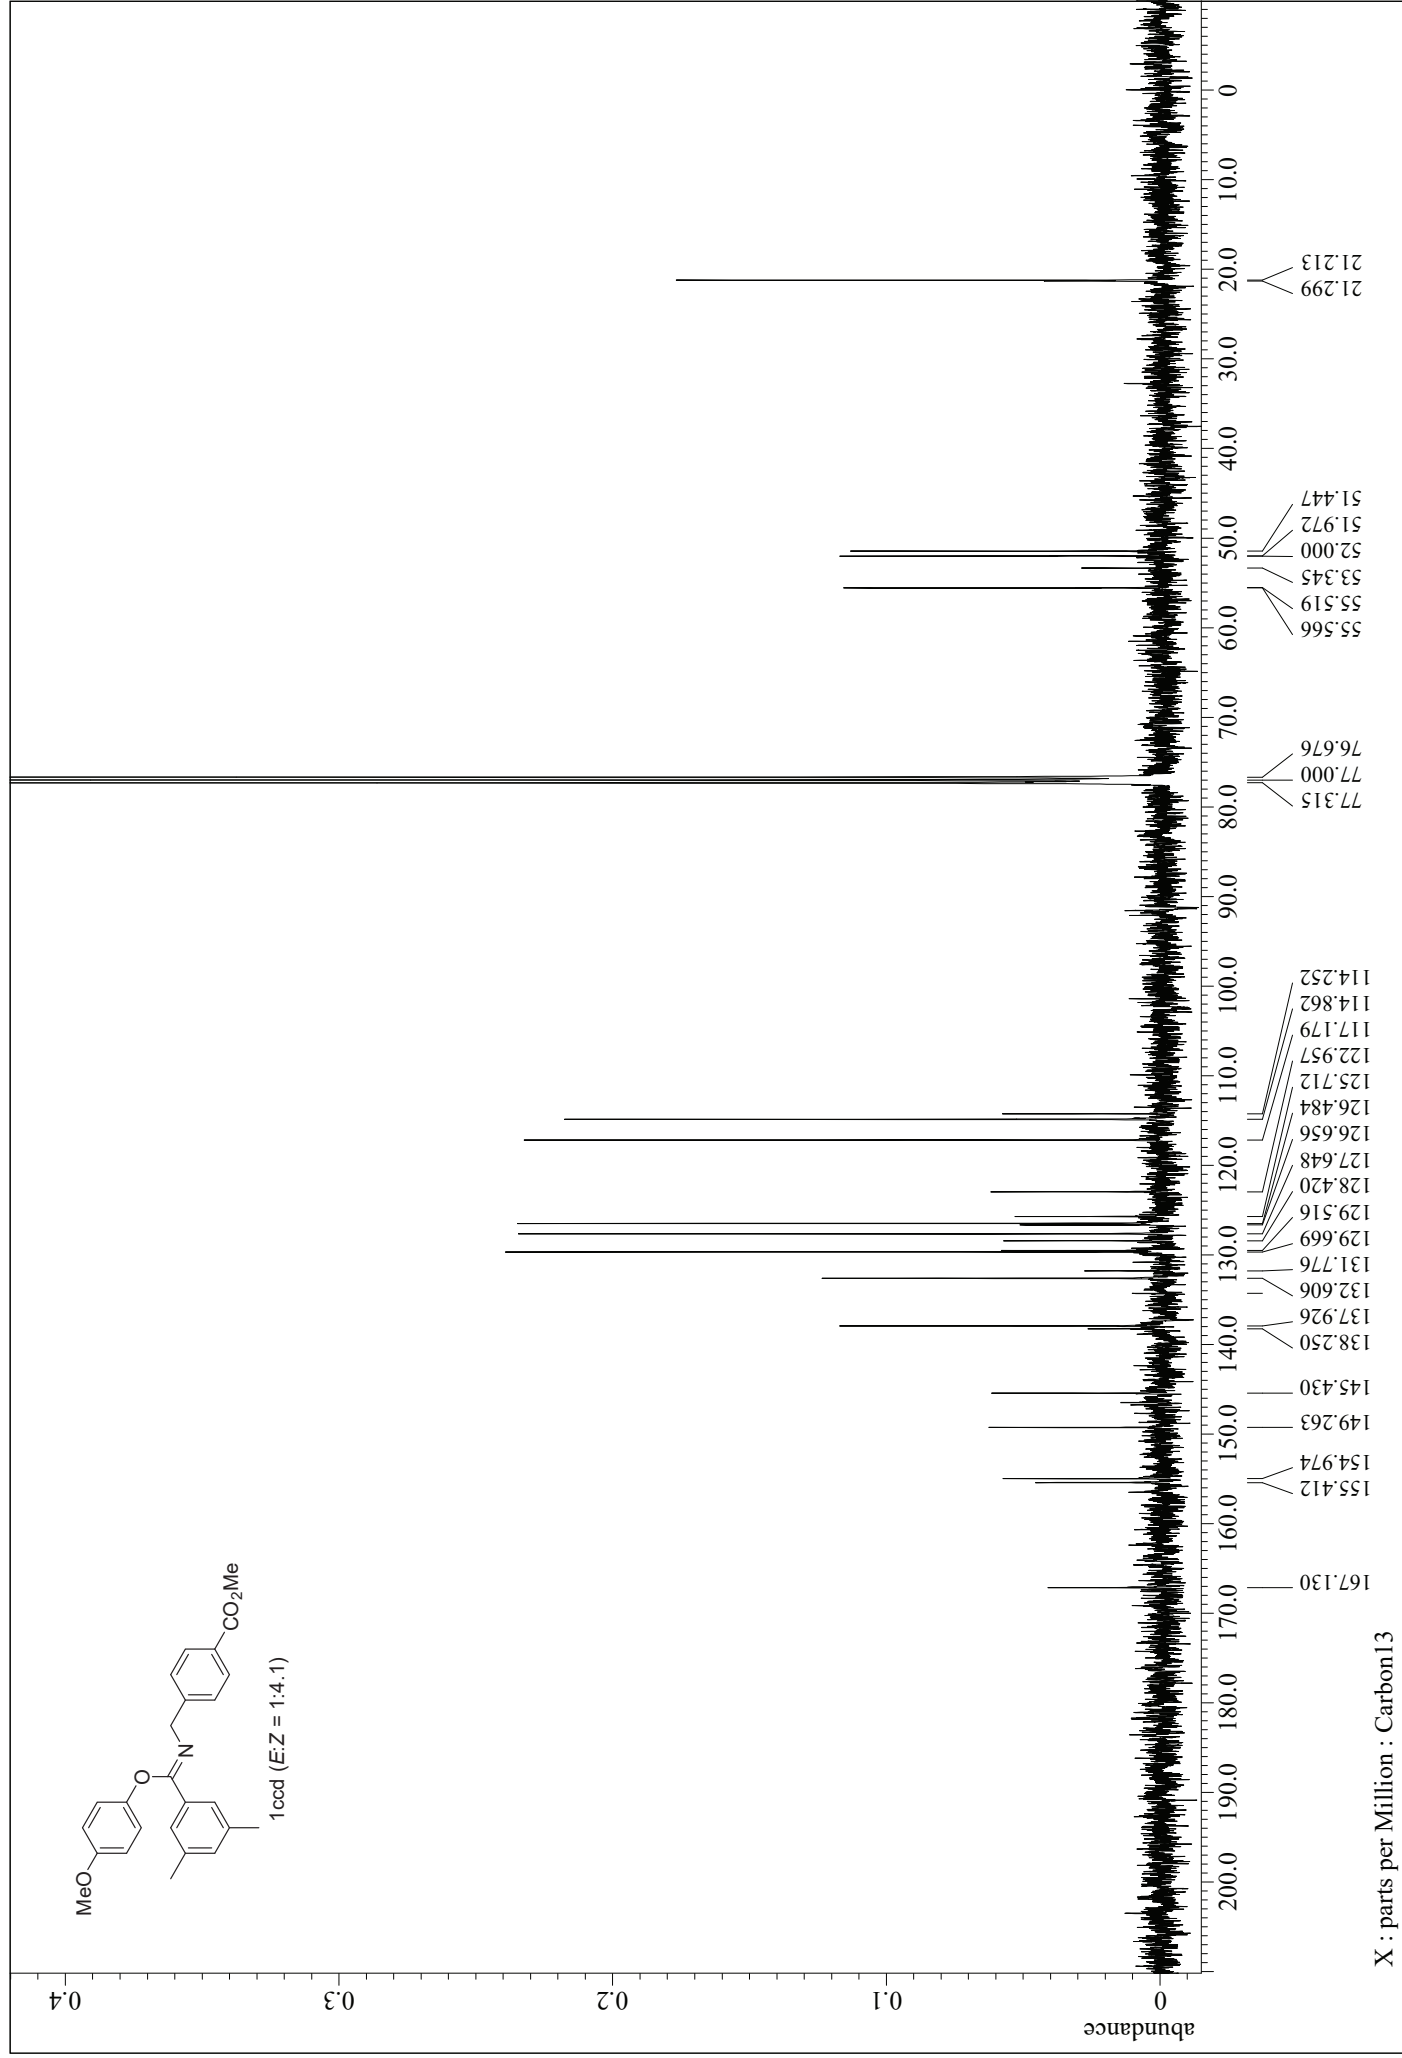

X : parts per Million : Carbon13



<sup>1</sup>H NMR (400 MHz, CDCl<sub>3</sub>)

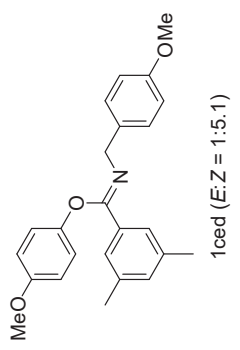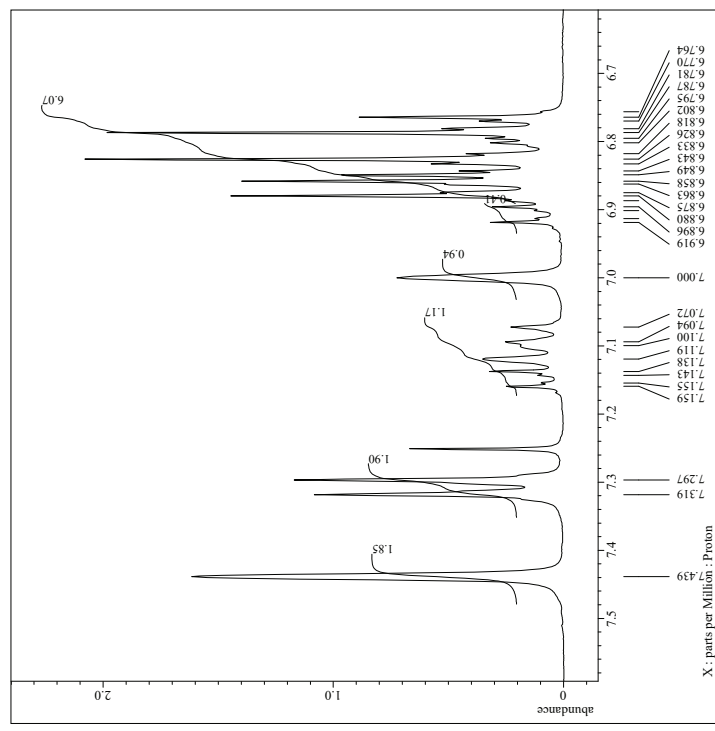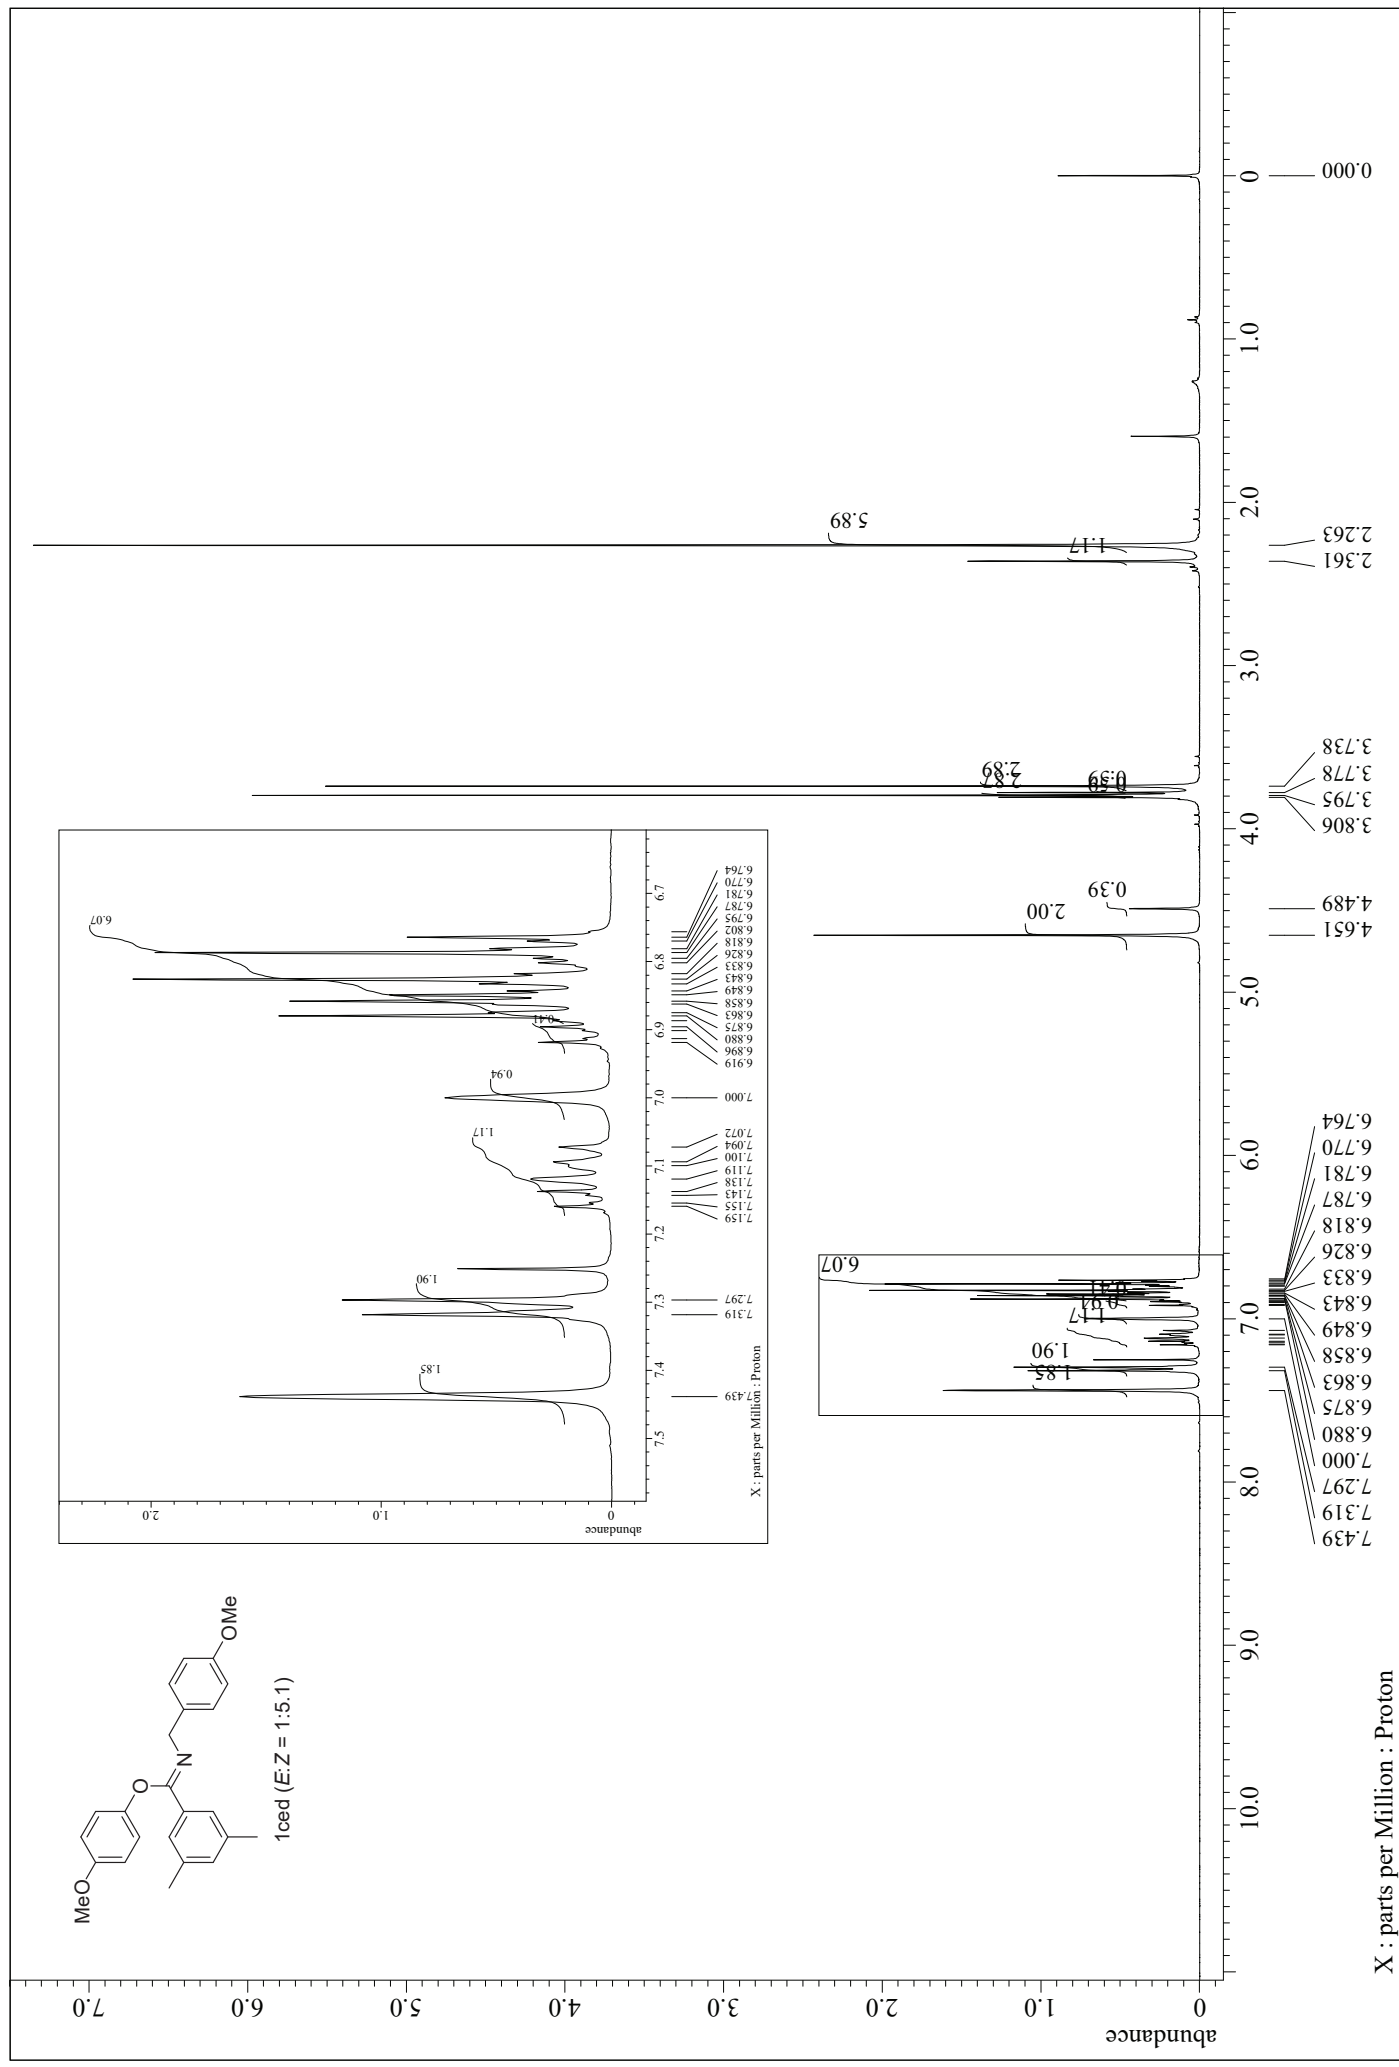

X : parts per Million : Proton

<sup>13</sup>C NMR (101 MHz, CDCl<sub>3</sub>)

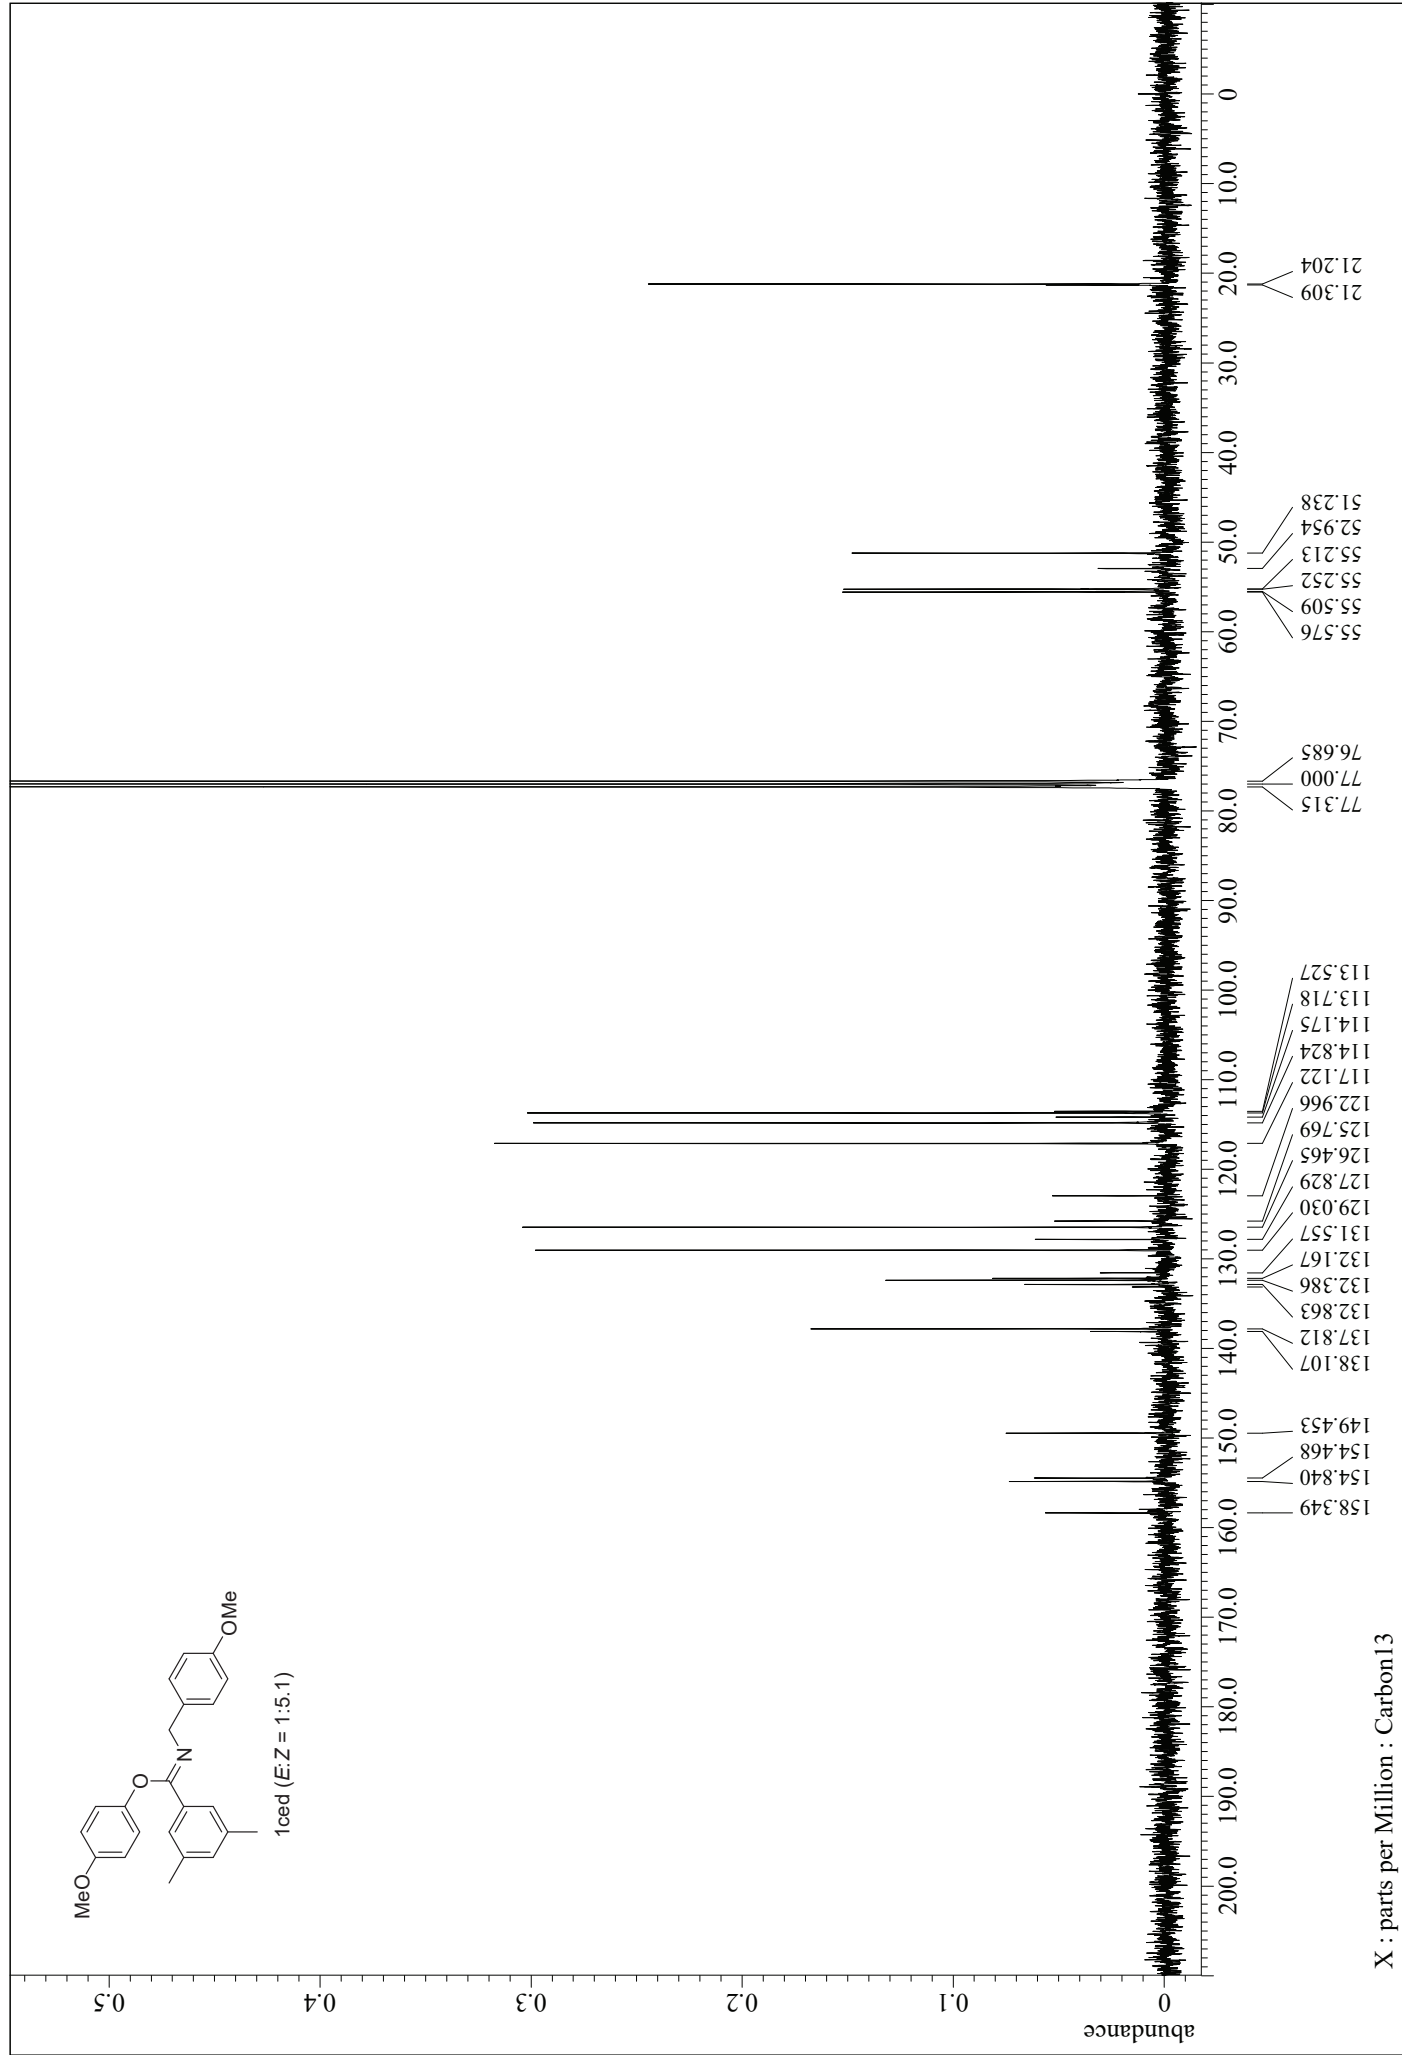

<sup>1</sup>H NMR (400 MHz, CDCl<sub>3</sub>)

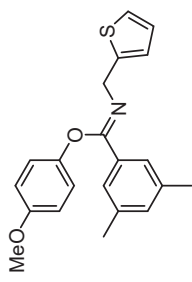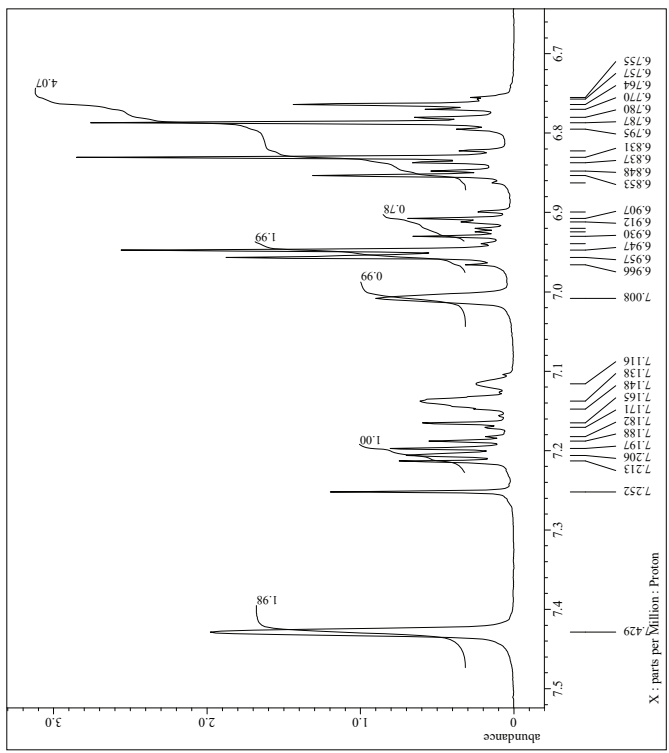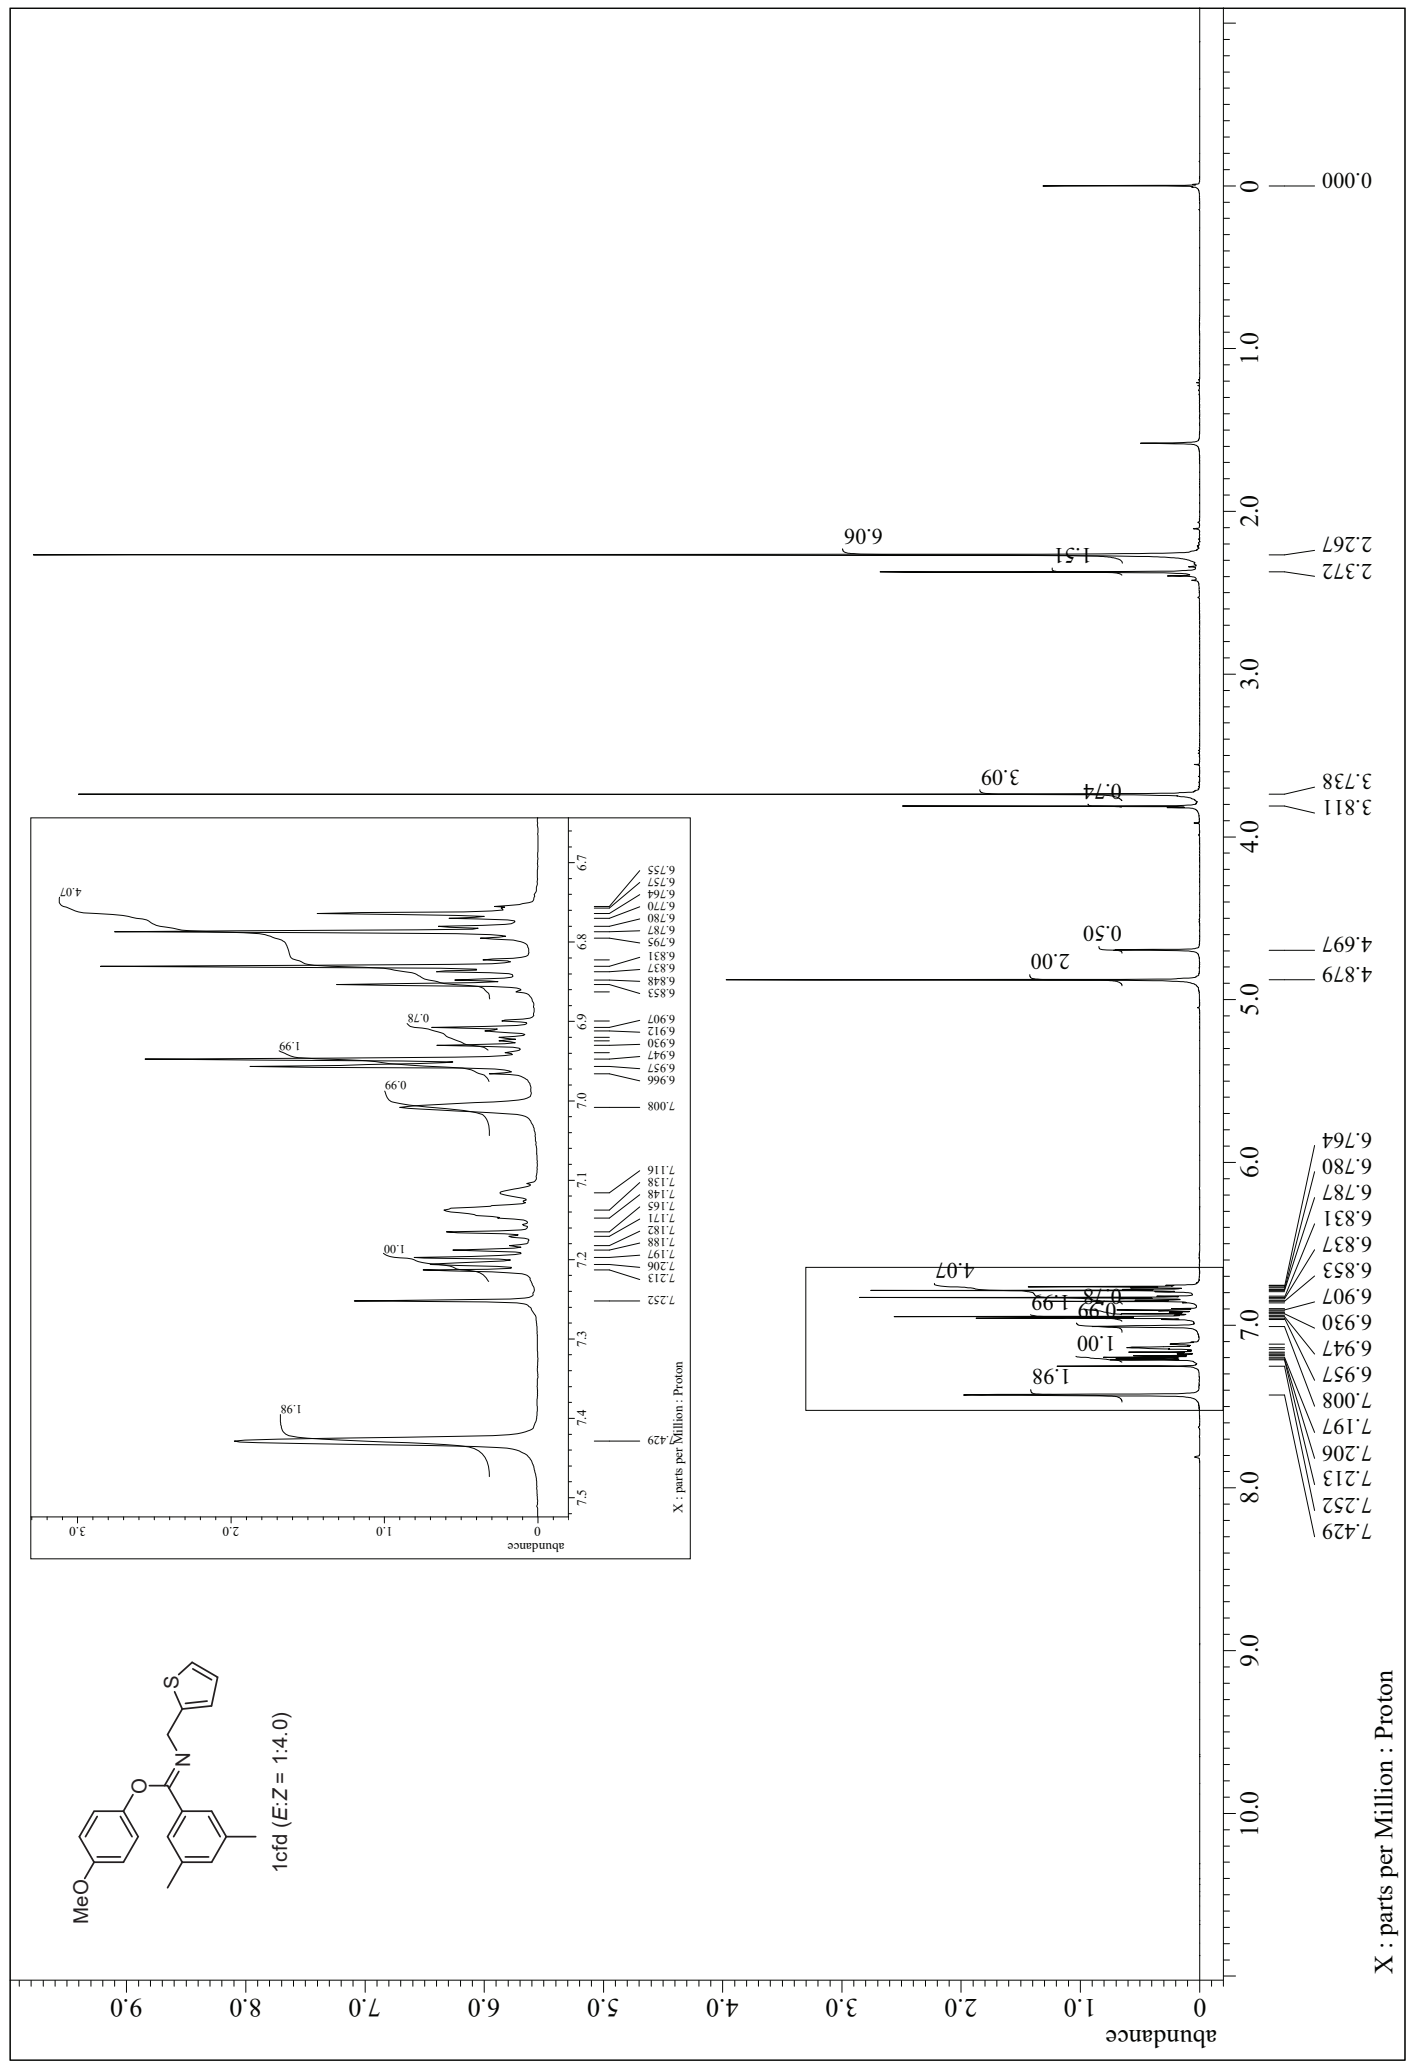

<sup>13</sup>C NMR (101 MHz, CDCl<sub>3</sub>)

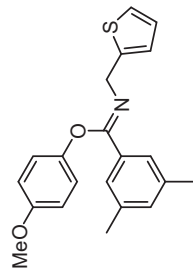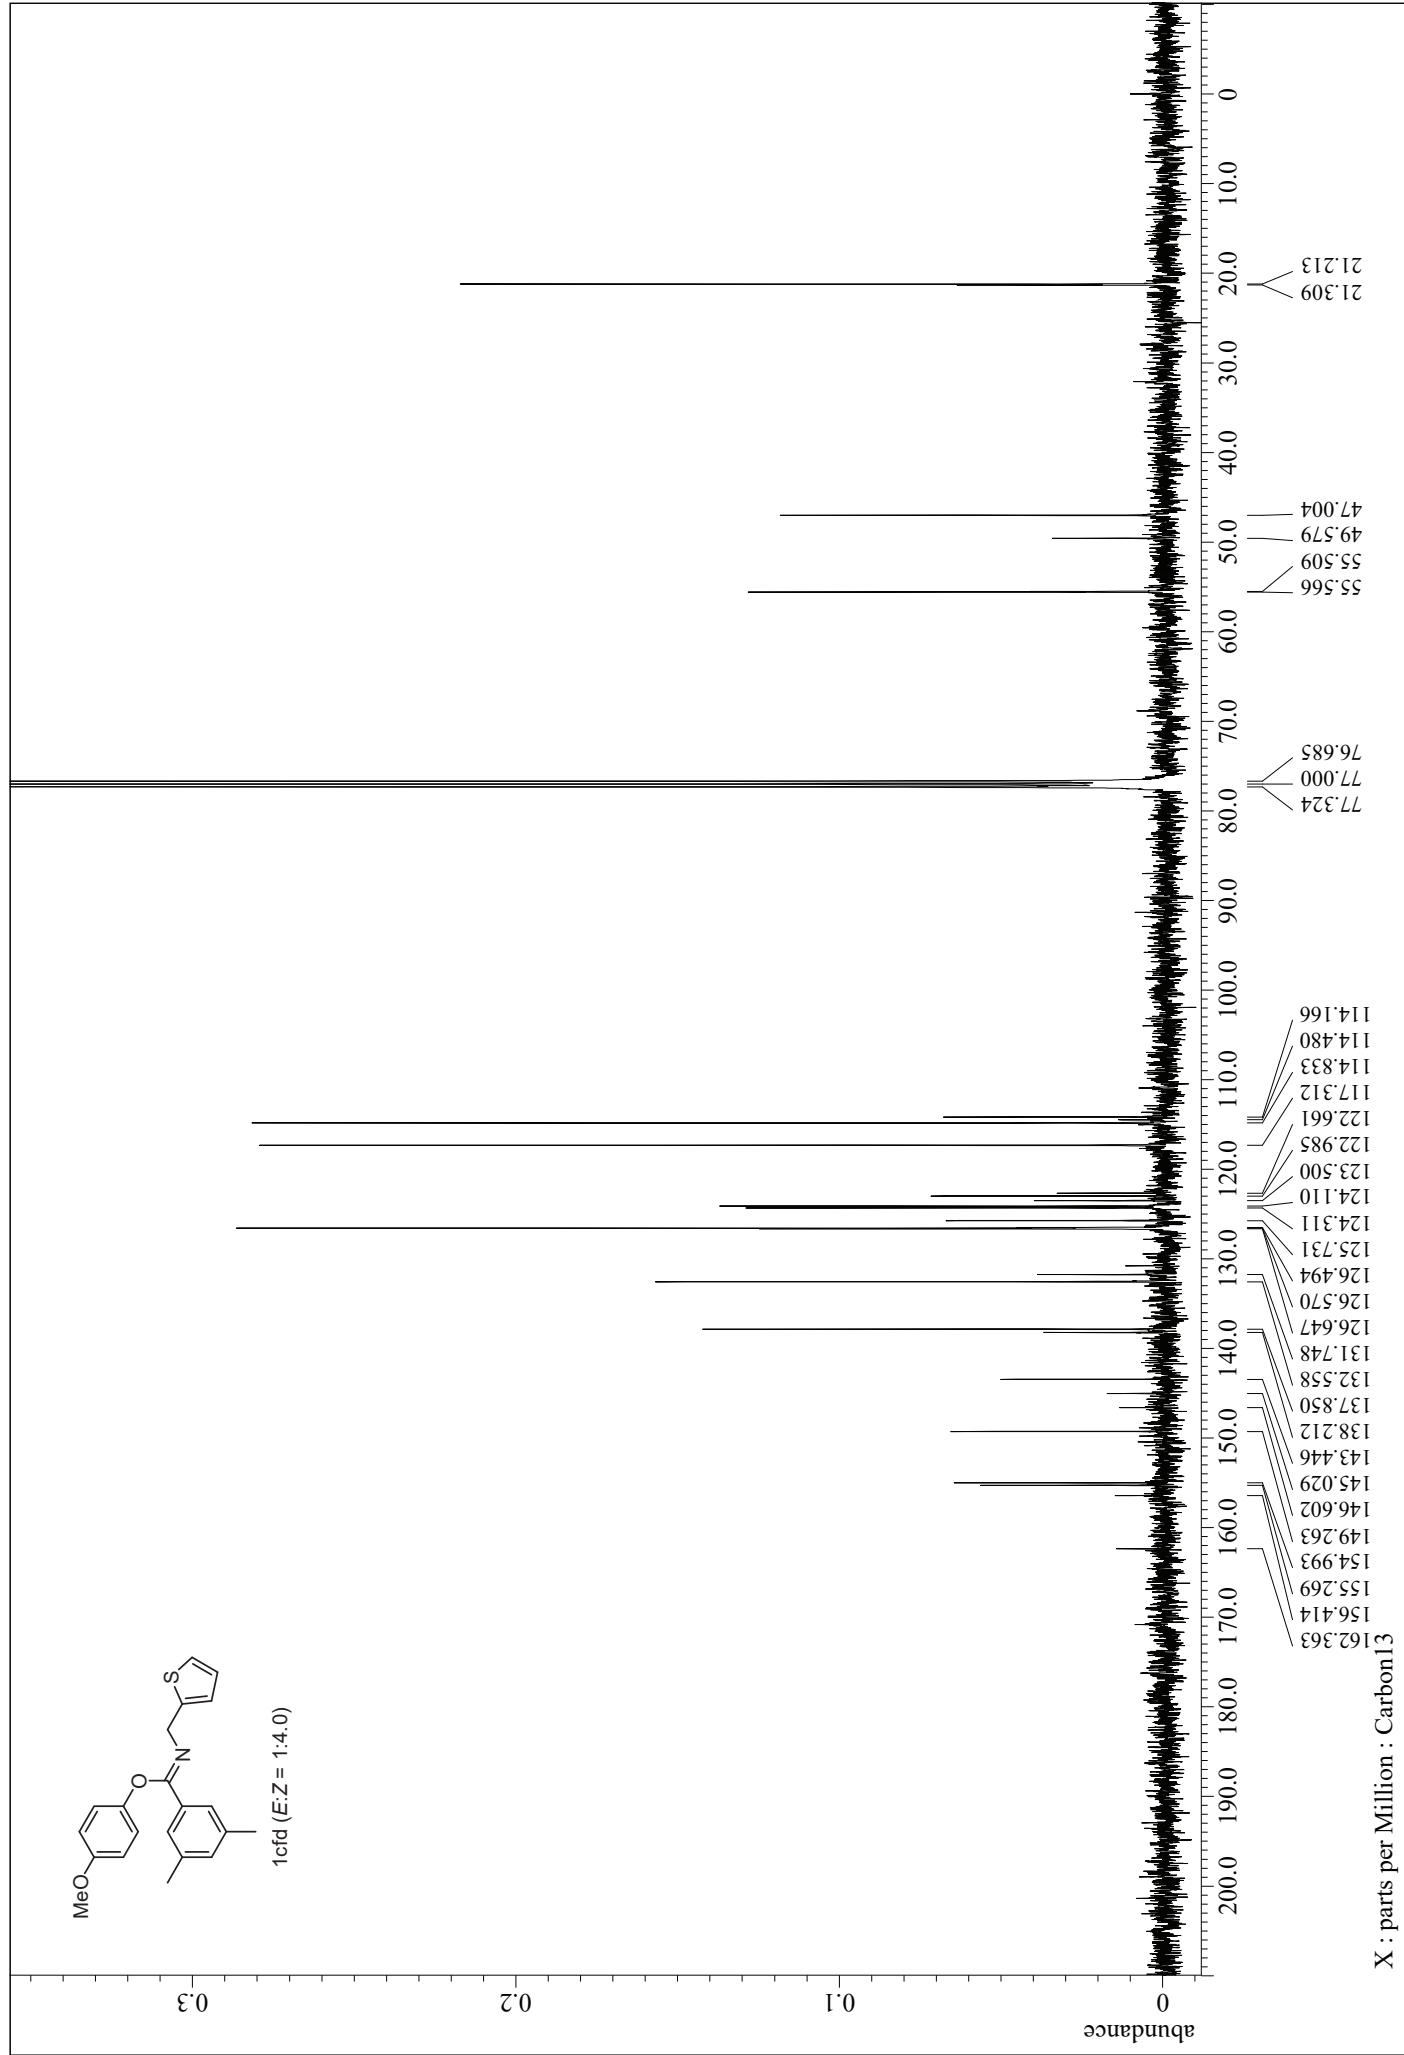

<sup>1</sup>H NMR (400 MHz, CDCl<sub>3</sub>)

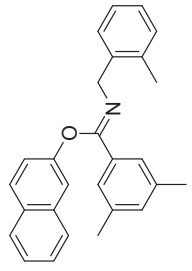

1add (E:Z = 1:13)

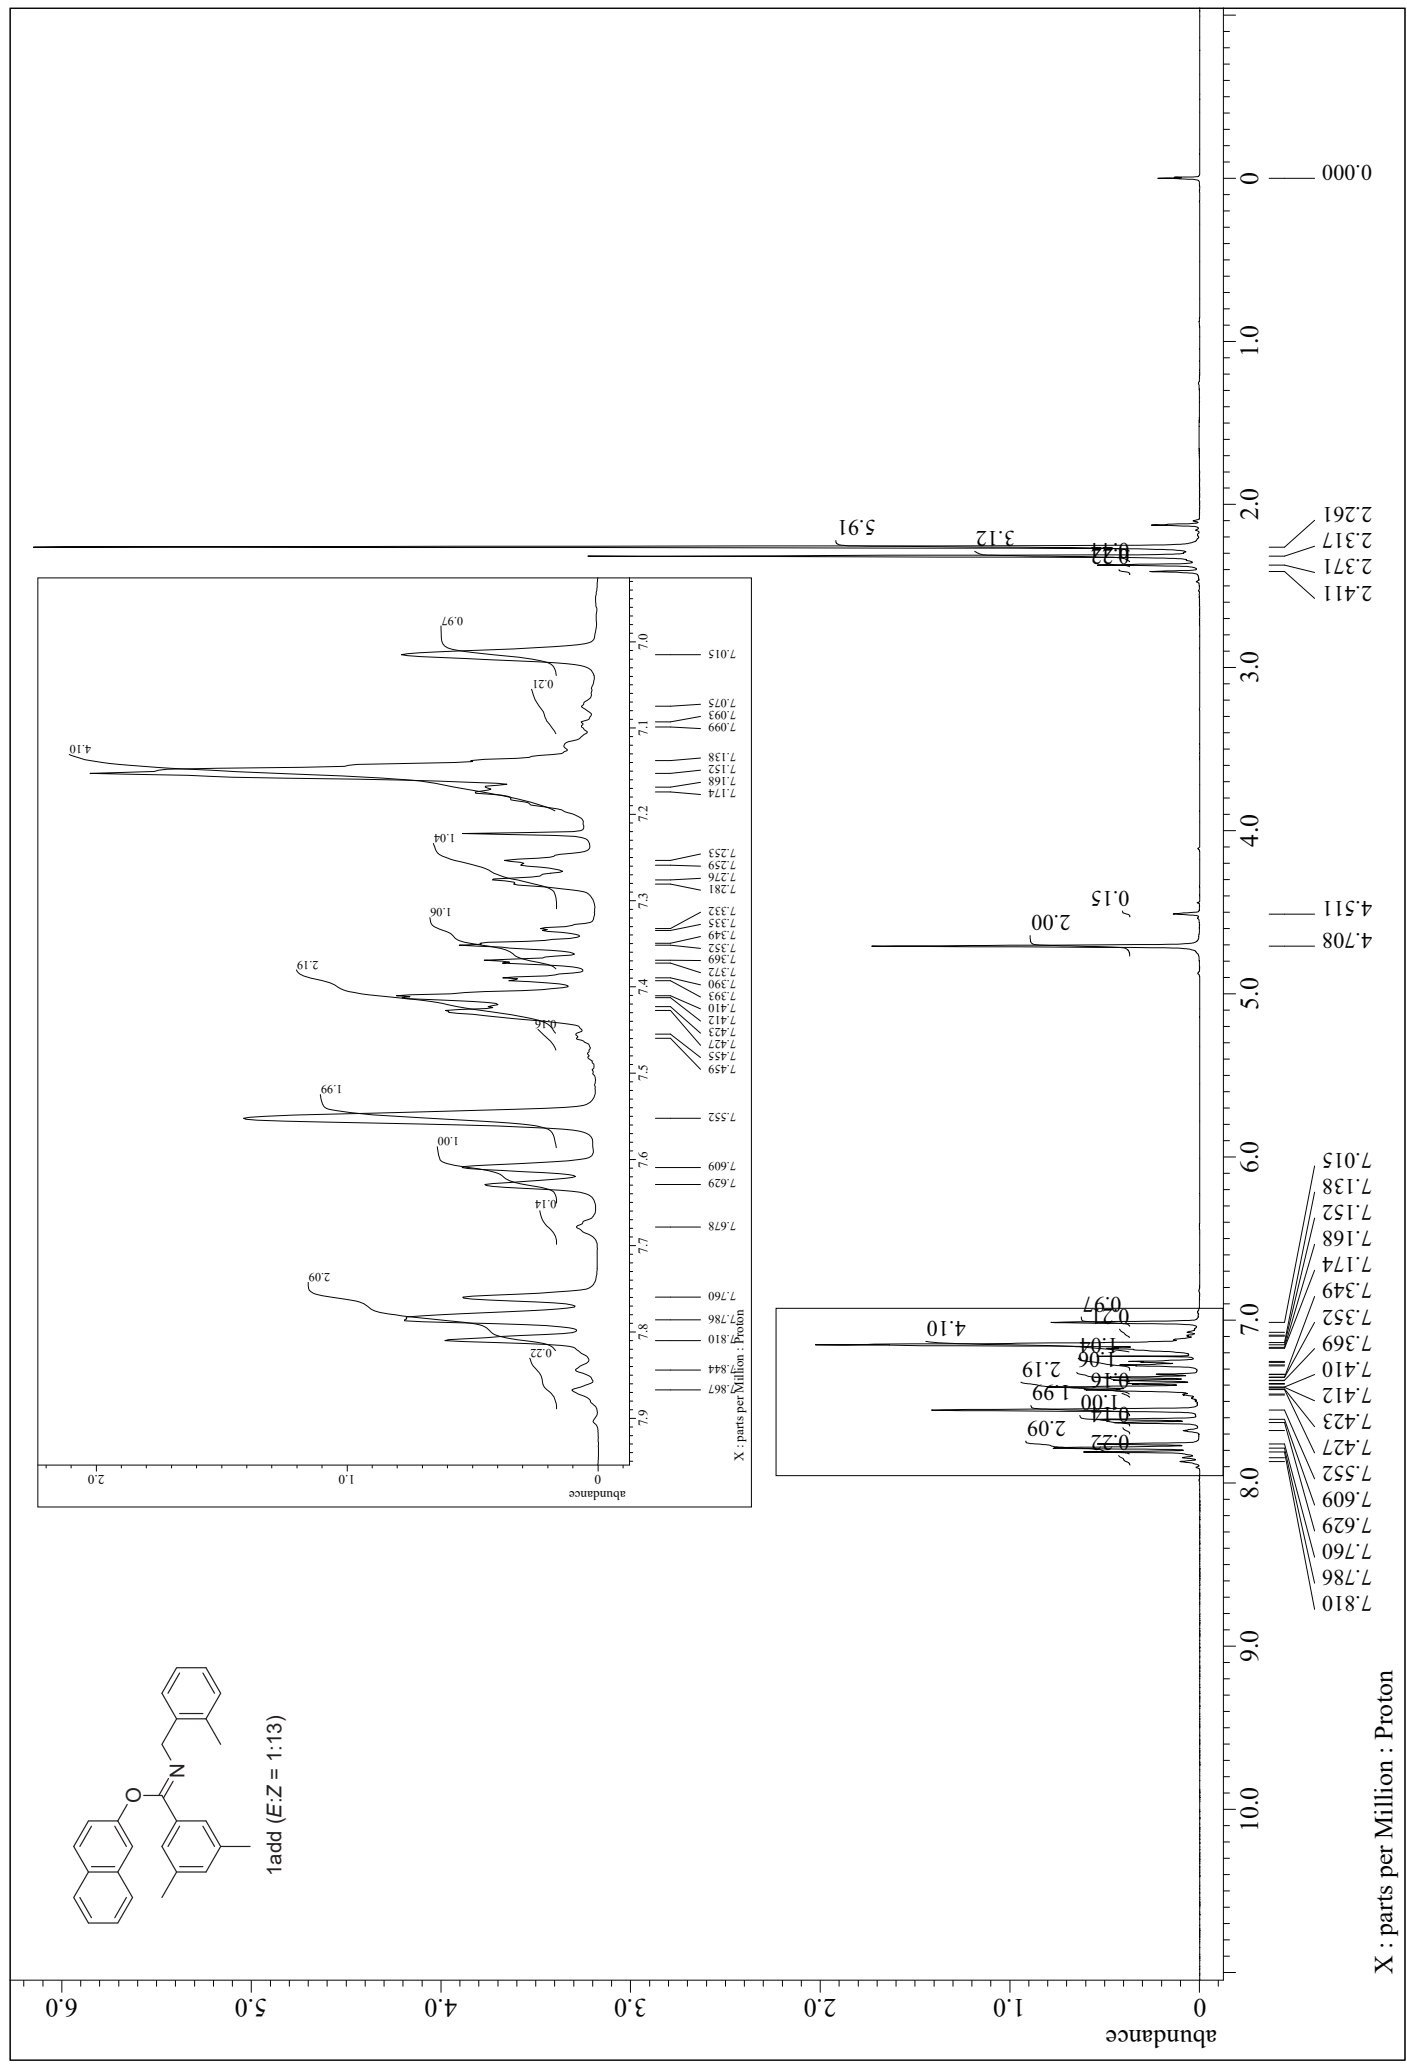

X : parts per Million : Proton

<sup>13</sup>C NMR (101 MHz, CDCl<sub>3</sub>)

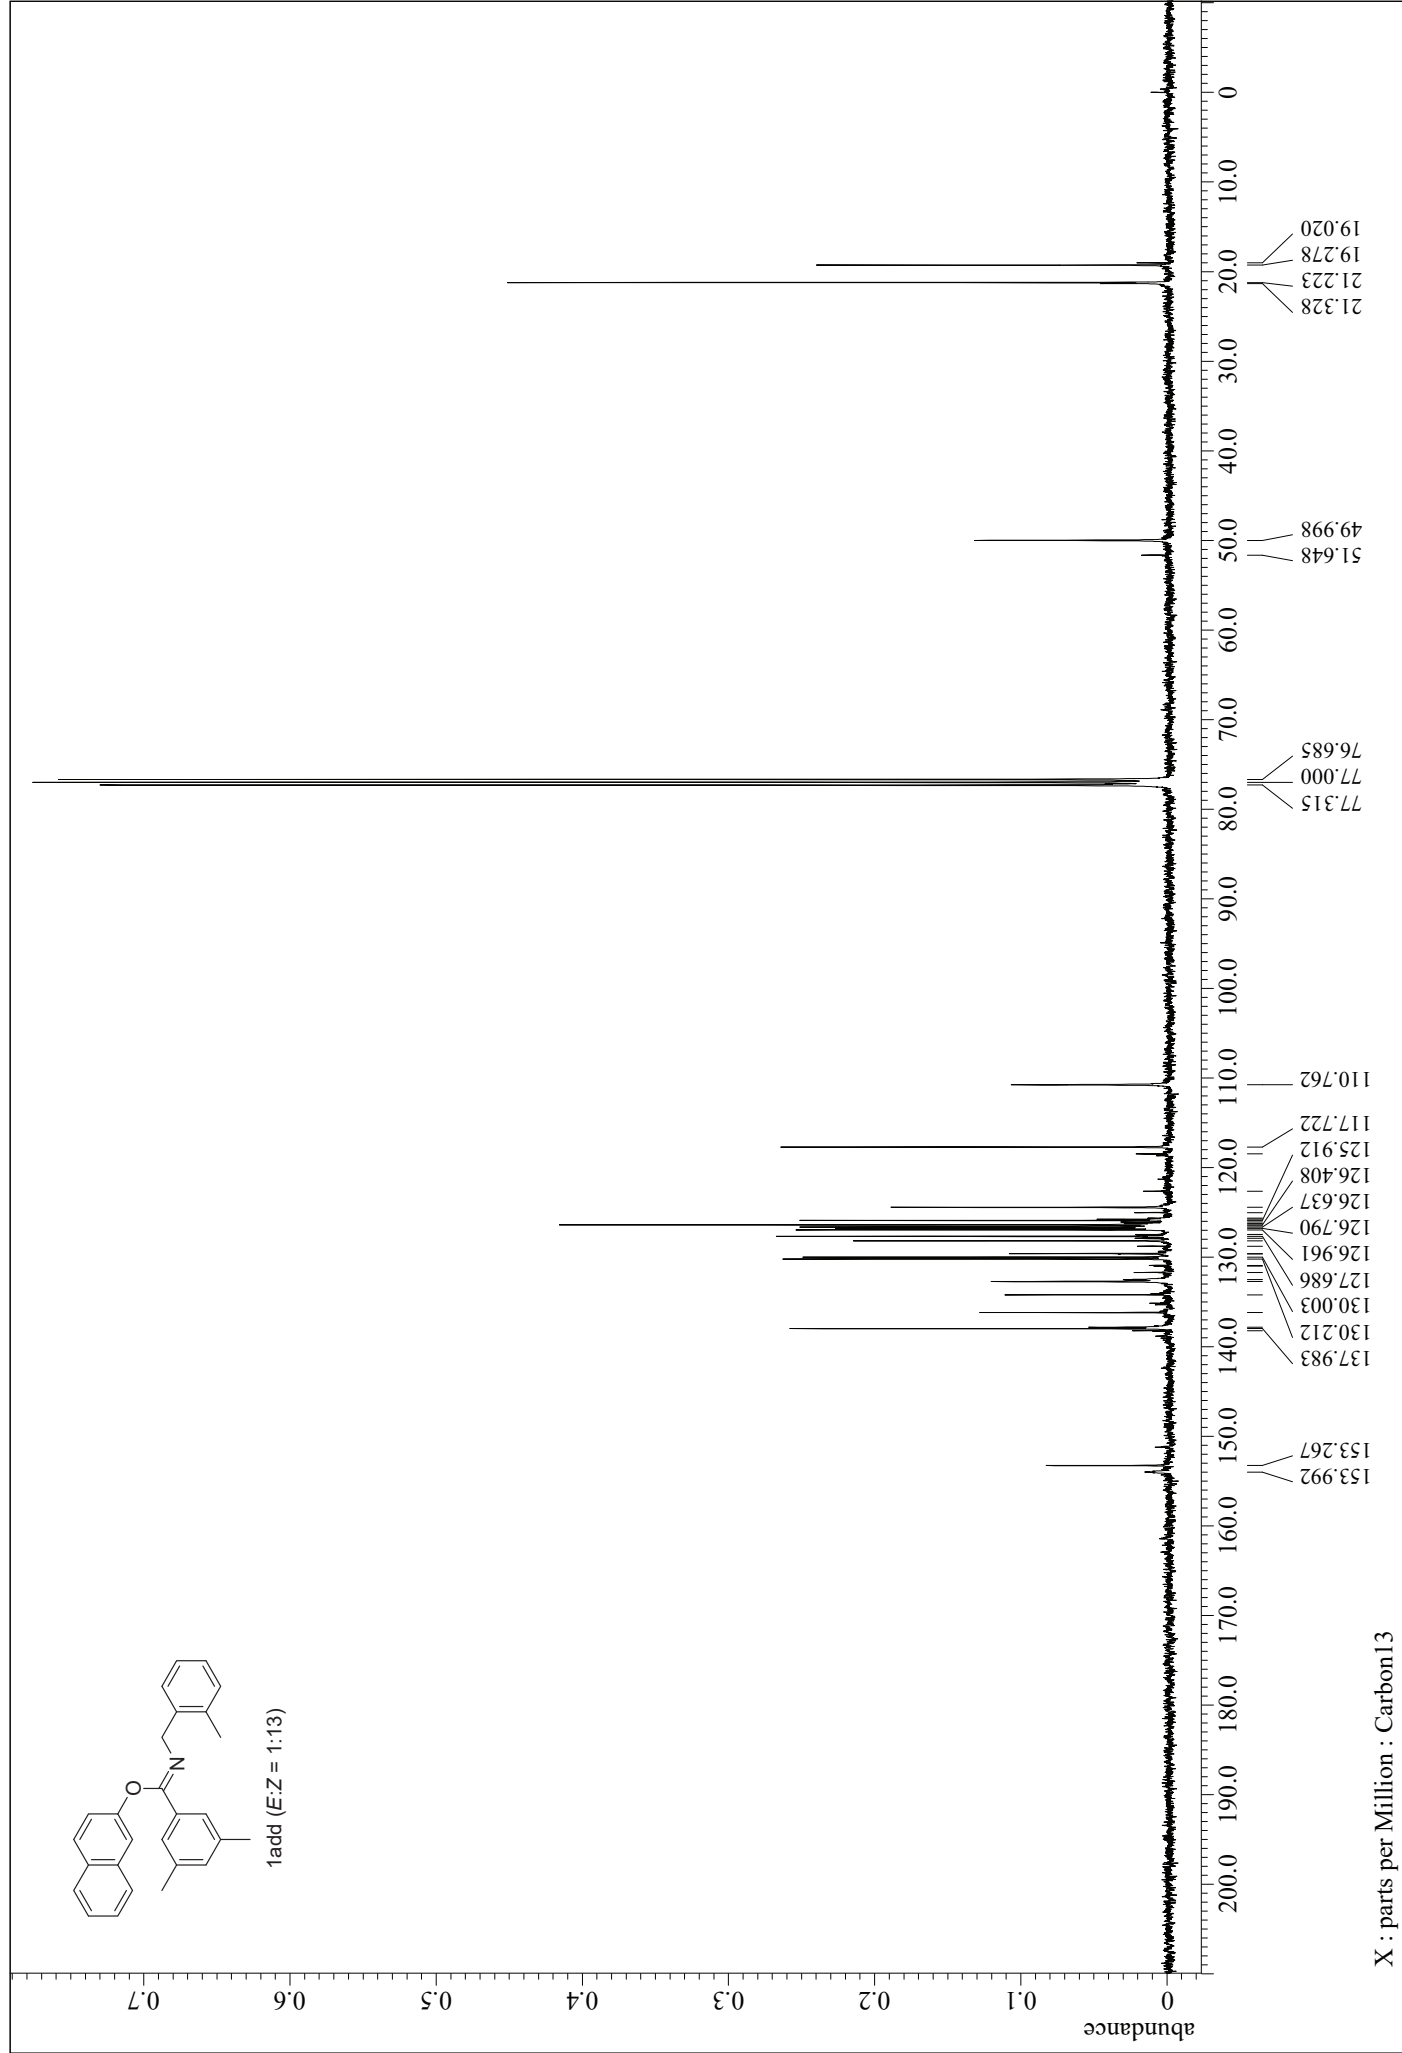

<sup>1</sup>H NMR (400 MHz, CDCl<sub>3</sub>)

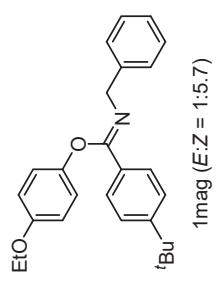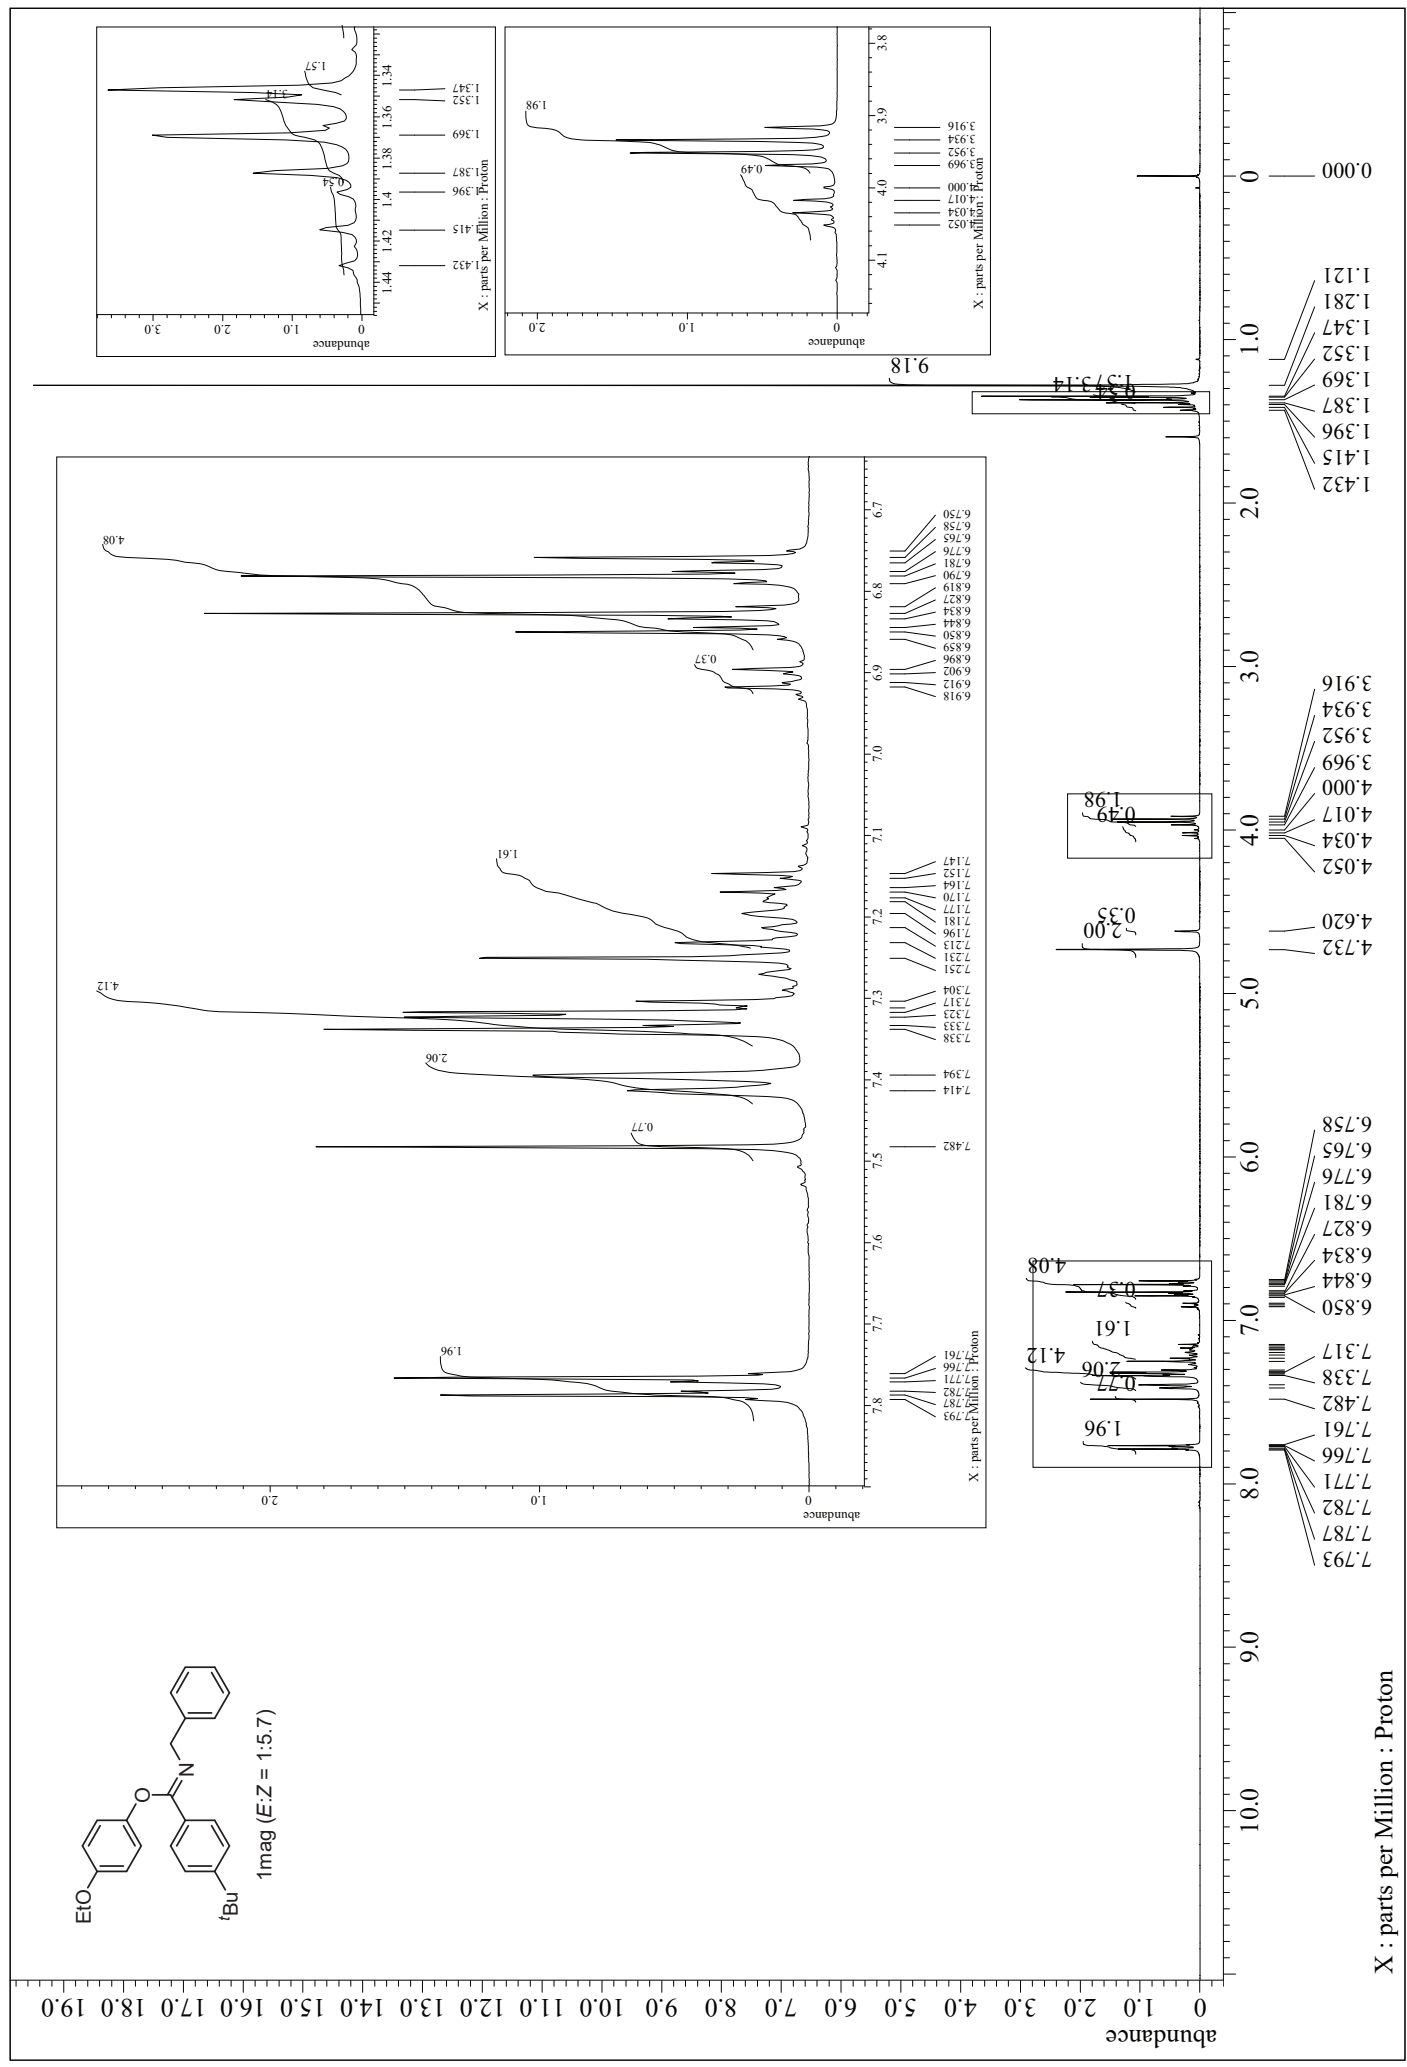

X : parts per Million : Proton

<sup>13</sup>C NMR (101 MHz, CDCl<sub>3</sub>)

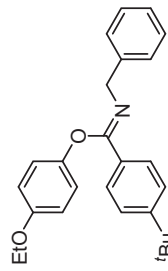

1mg (E:Z = 1:5.7)

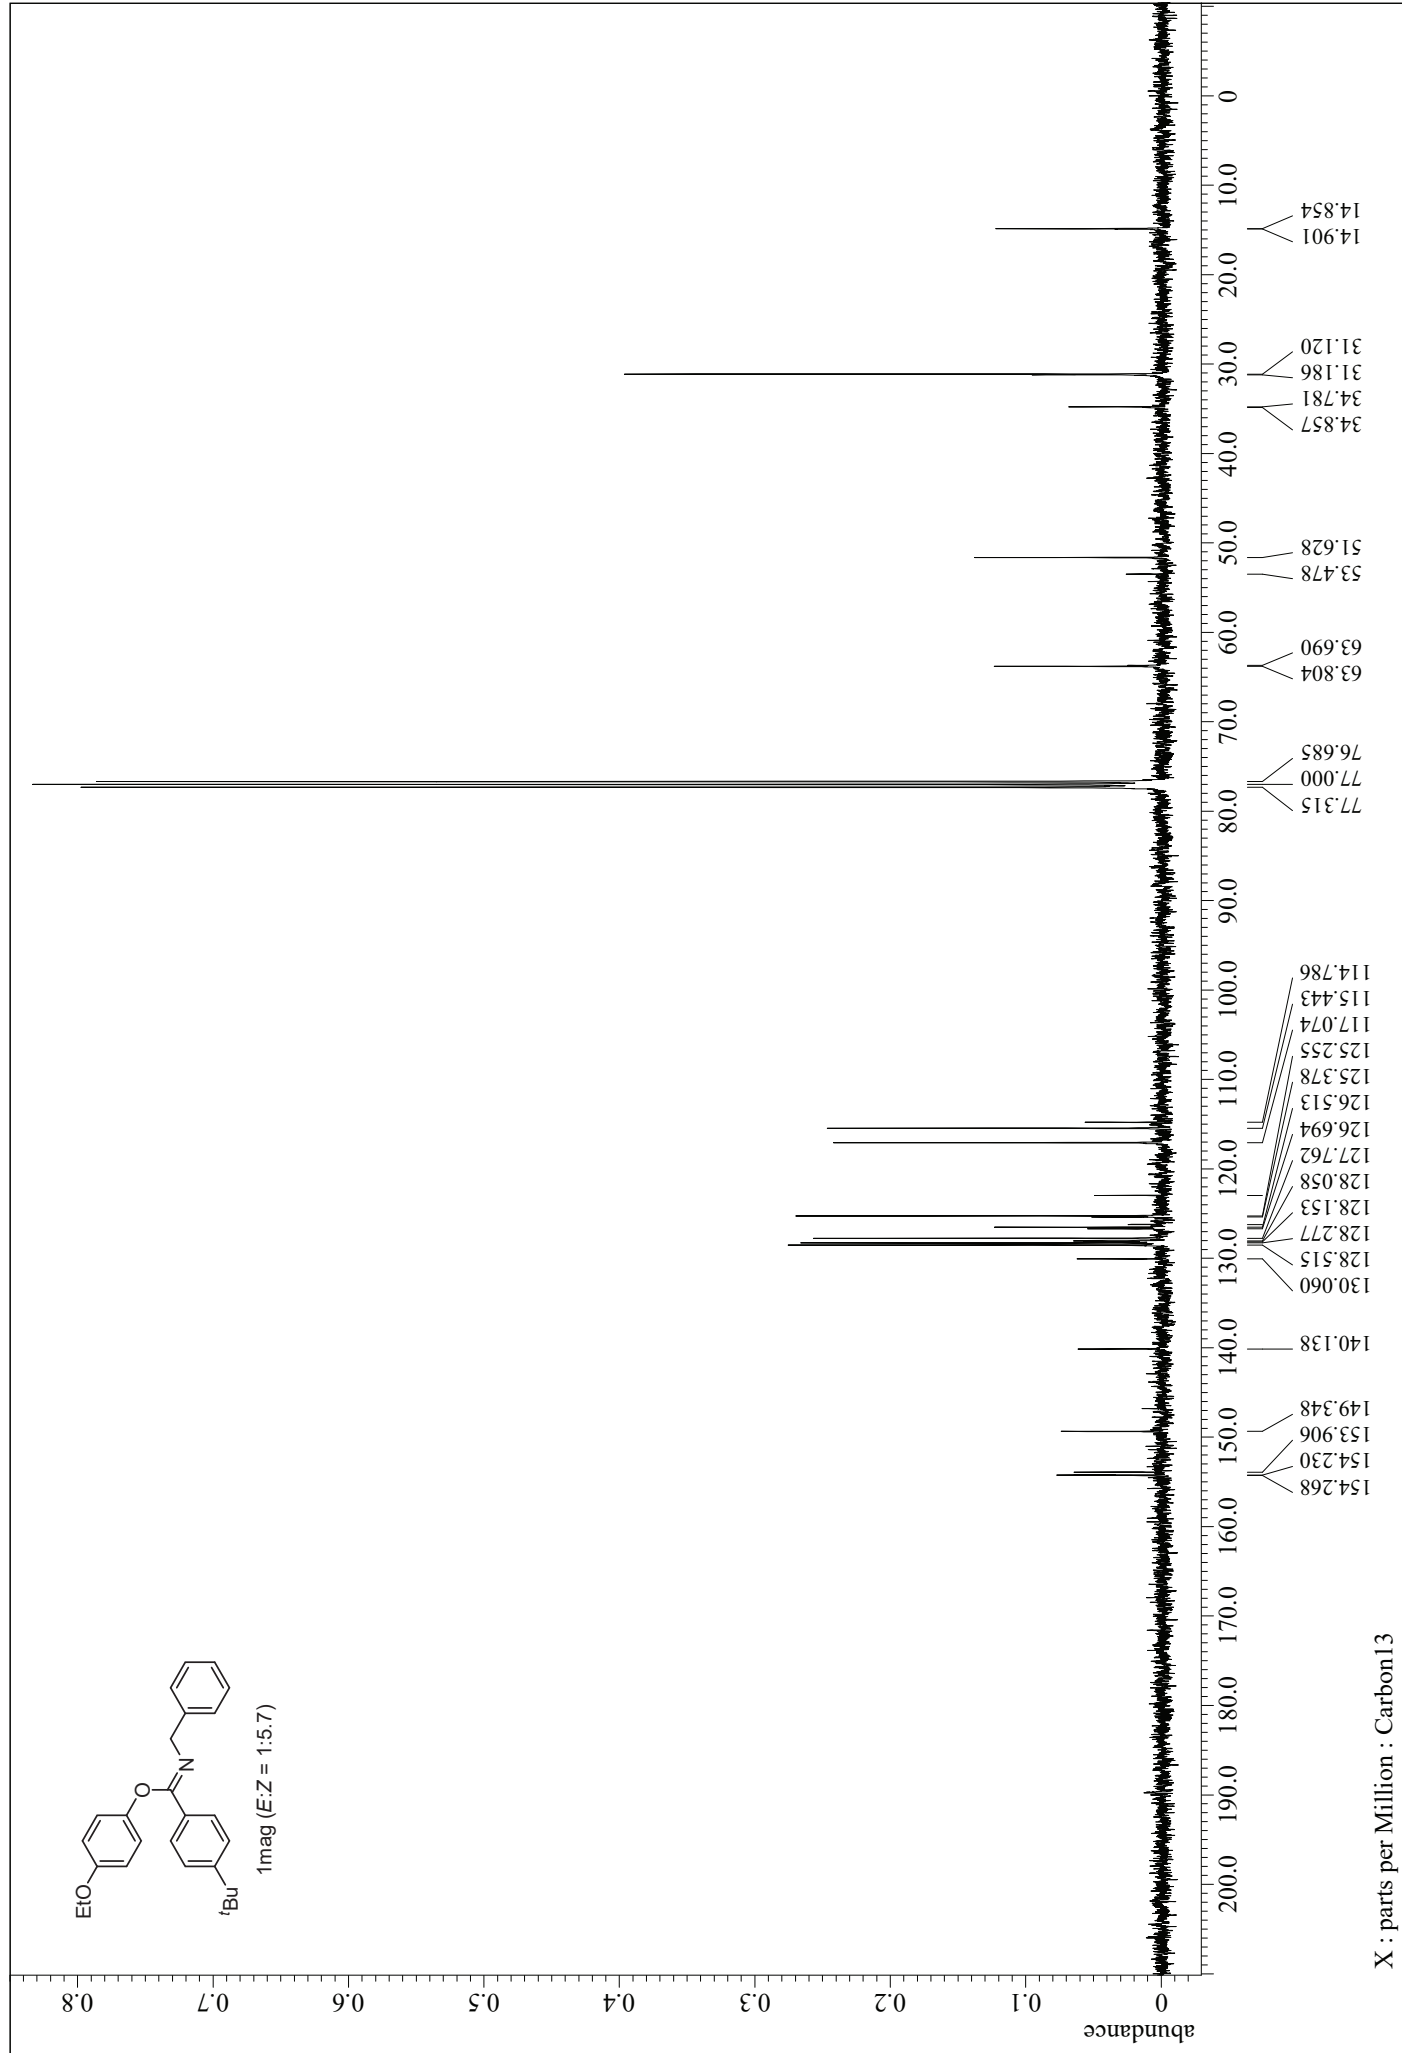



<sup>1</sup>H NMR (400 MHz, CDCl<sub>3</sub>)

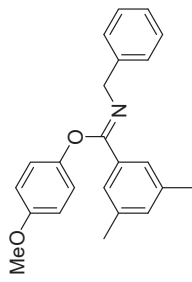

1cad (E:Z = 1:5.4)

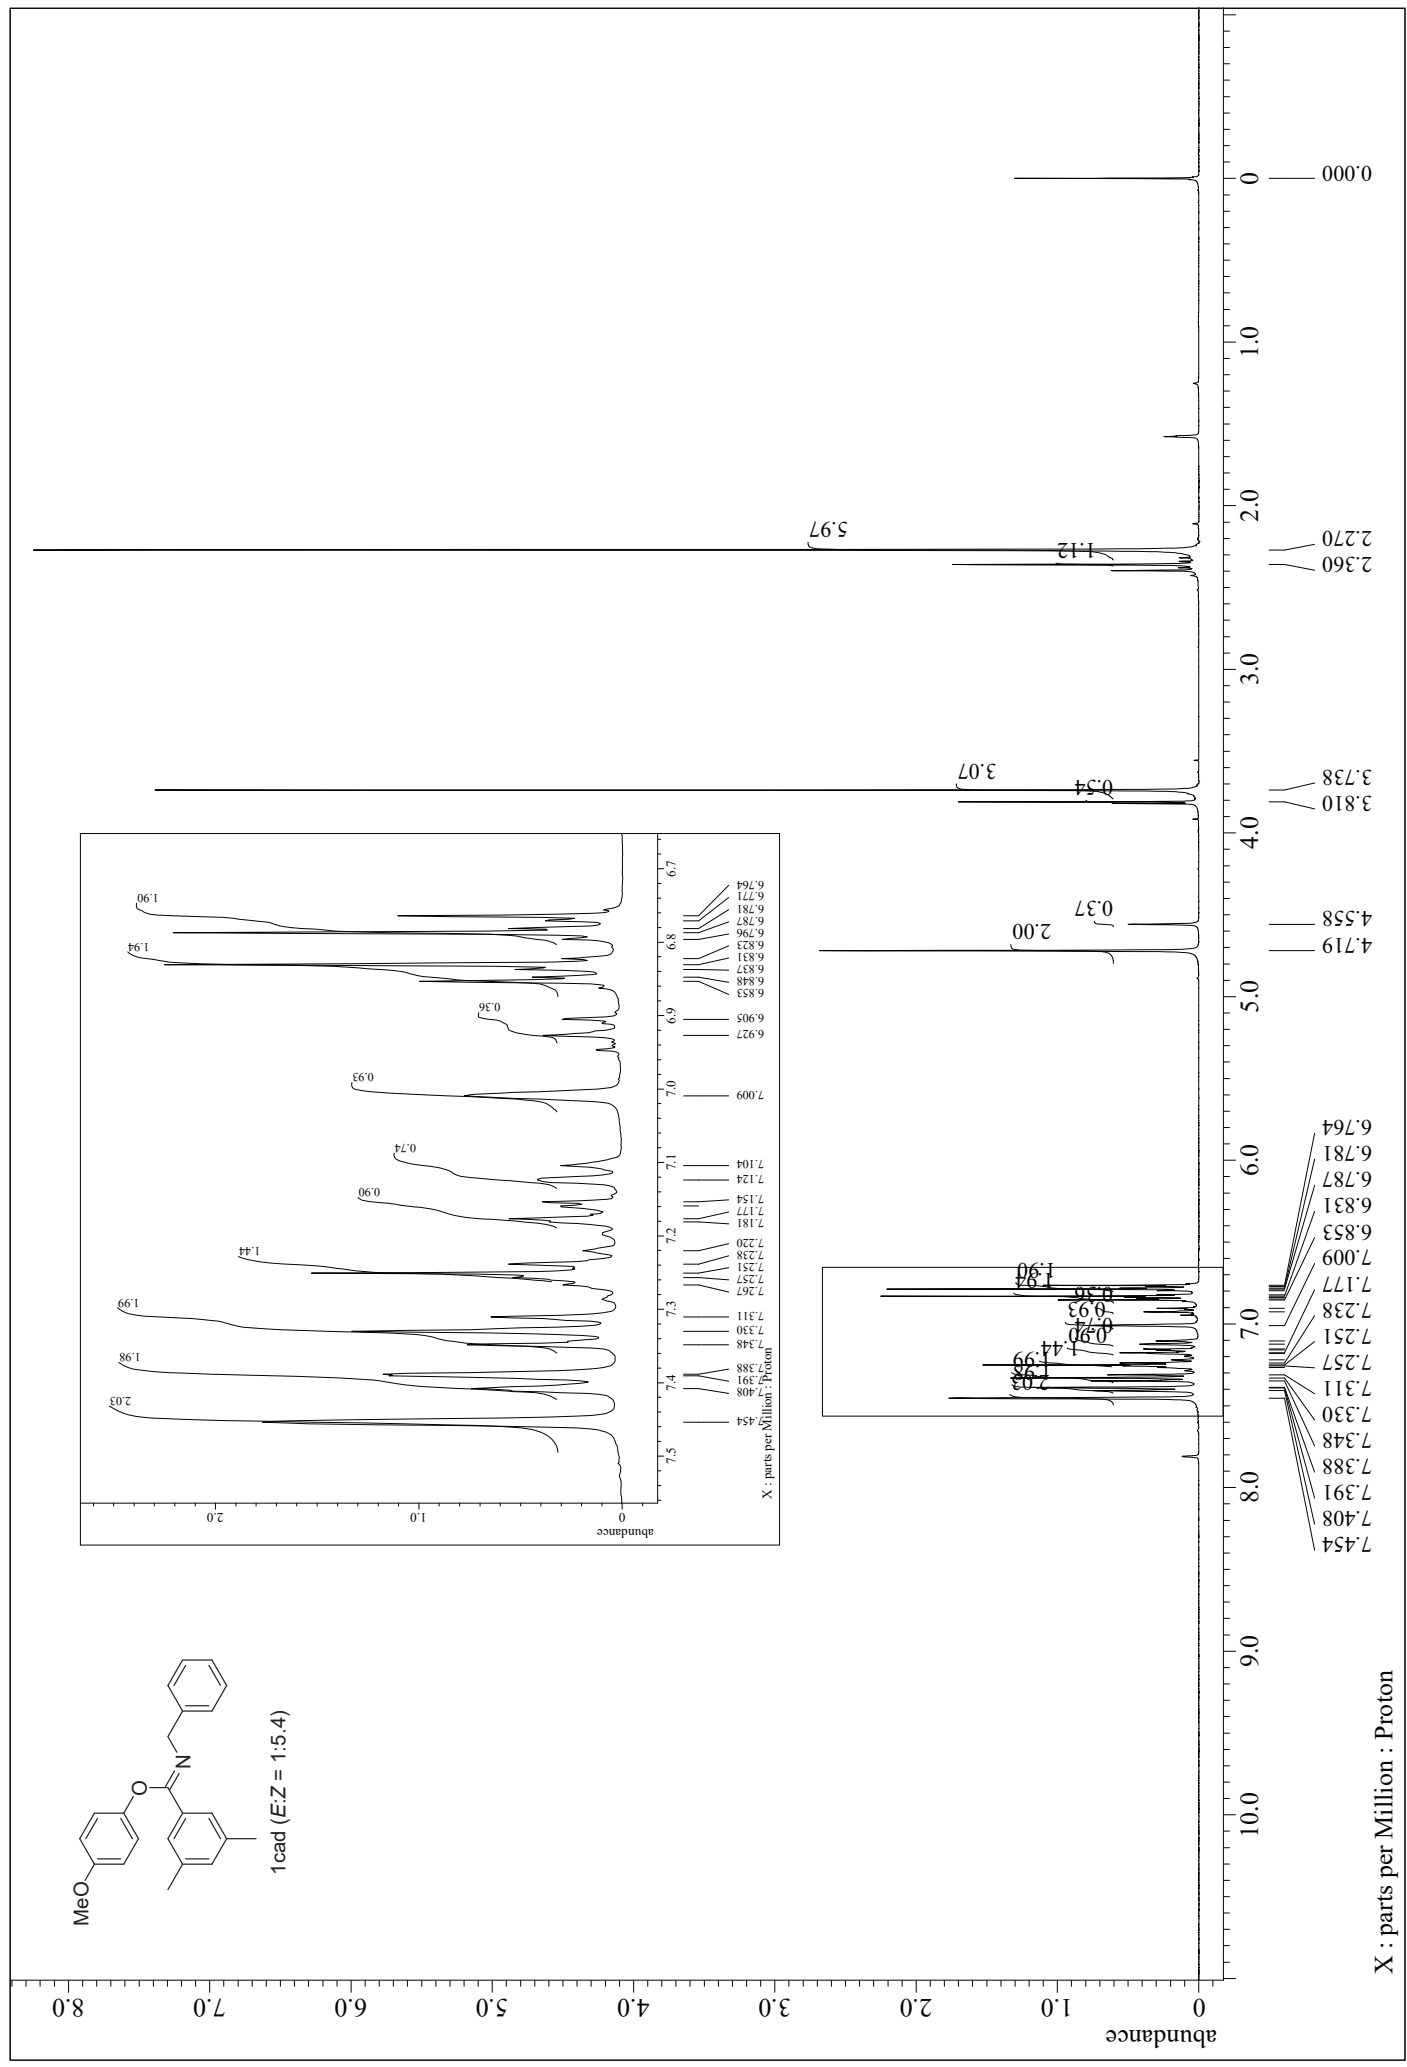

X : parts per Million : Proton

<sup>13</sup>C NMR (101 MHz, CDCl<sub>3</sub>)

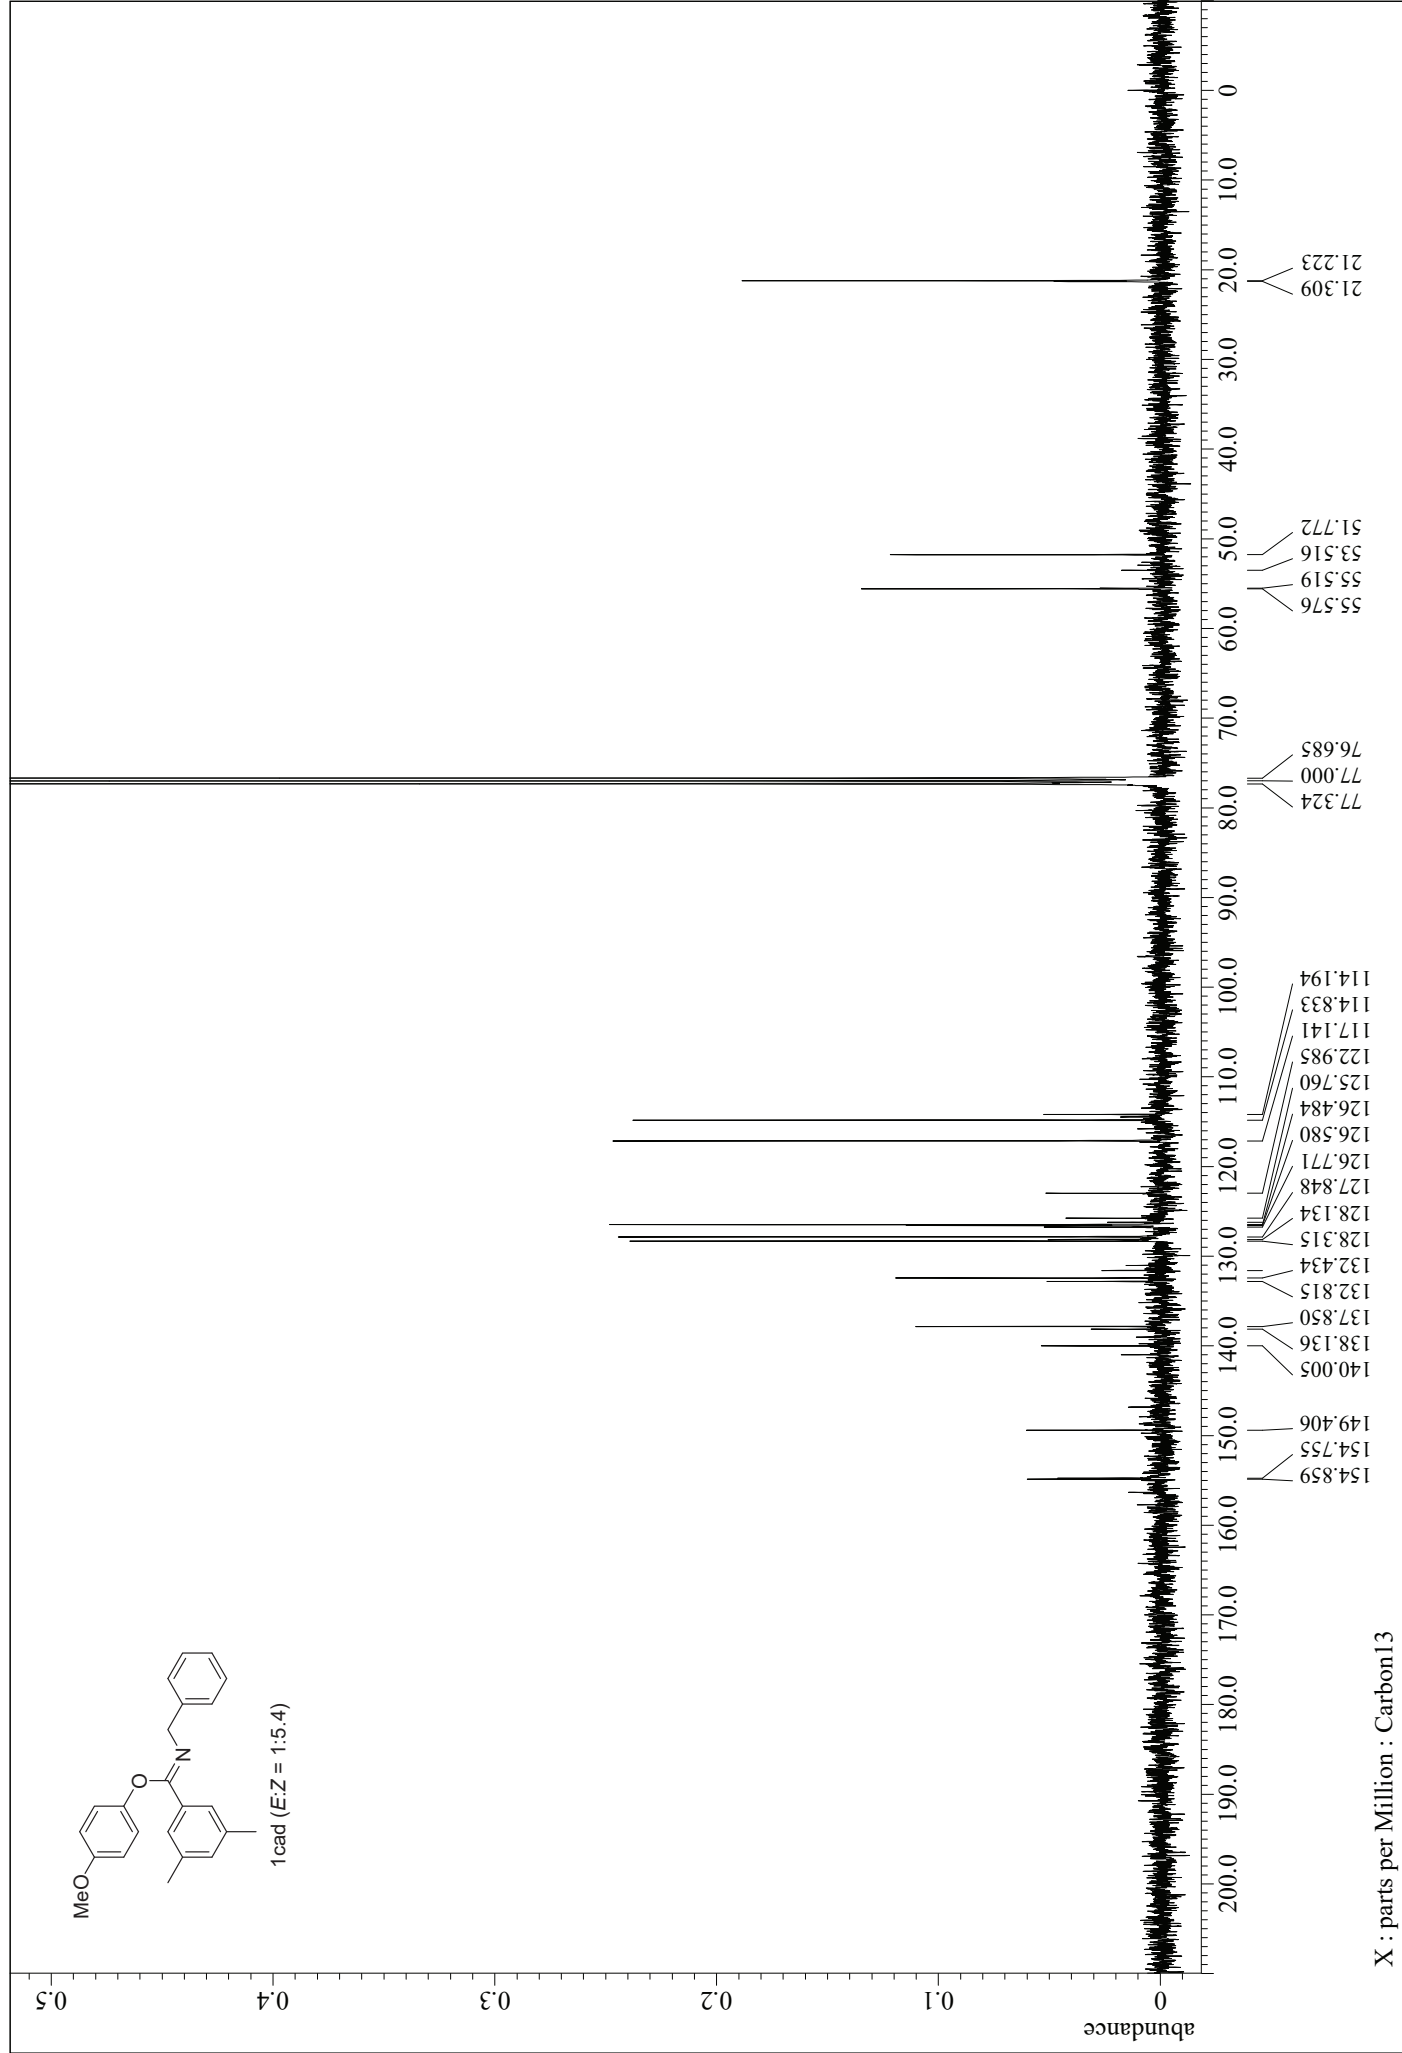

X : parts per Million : Carbon13

<sup>1</sup>H NMR (400 MHz, CDCl<sub>3</sub>)

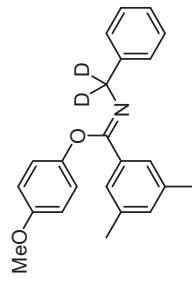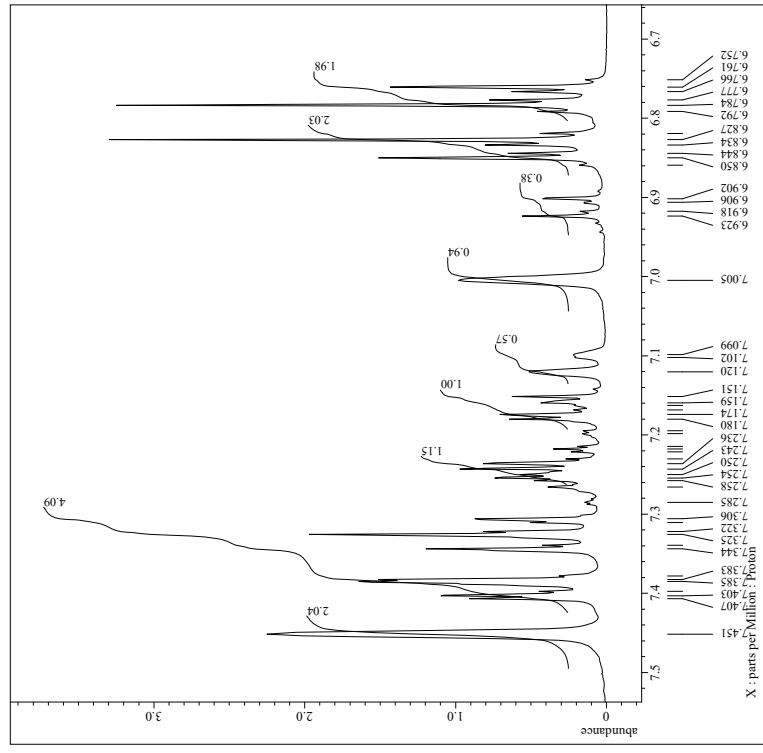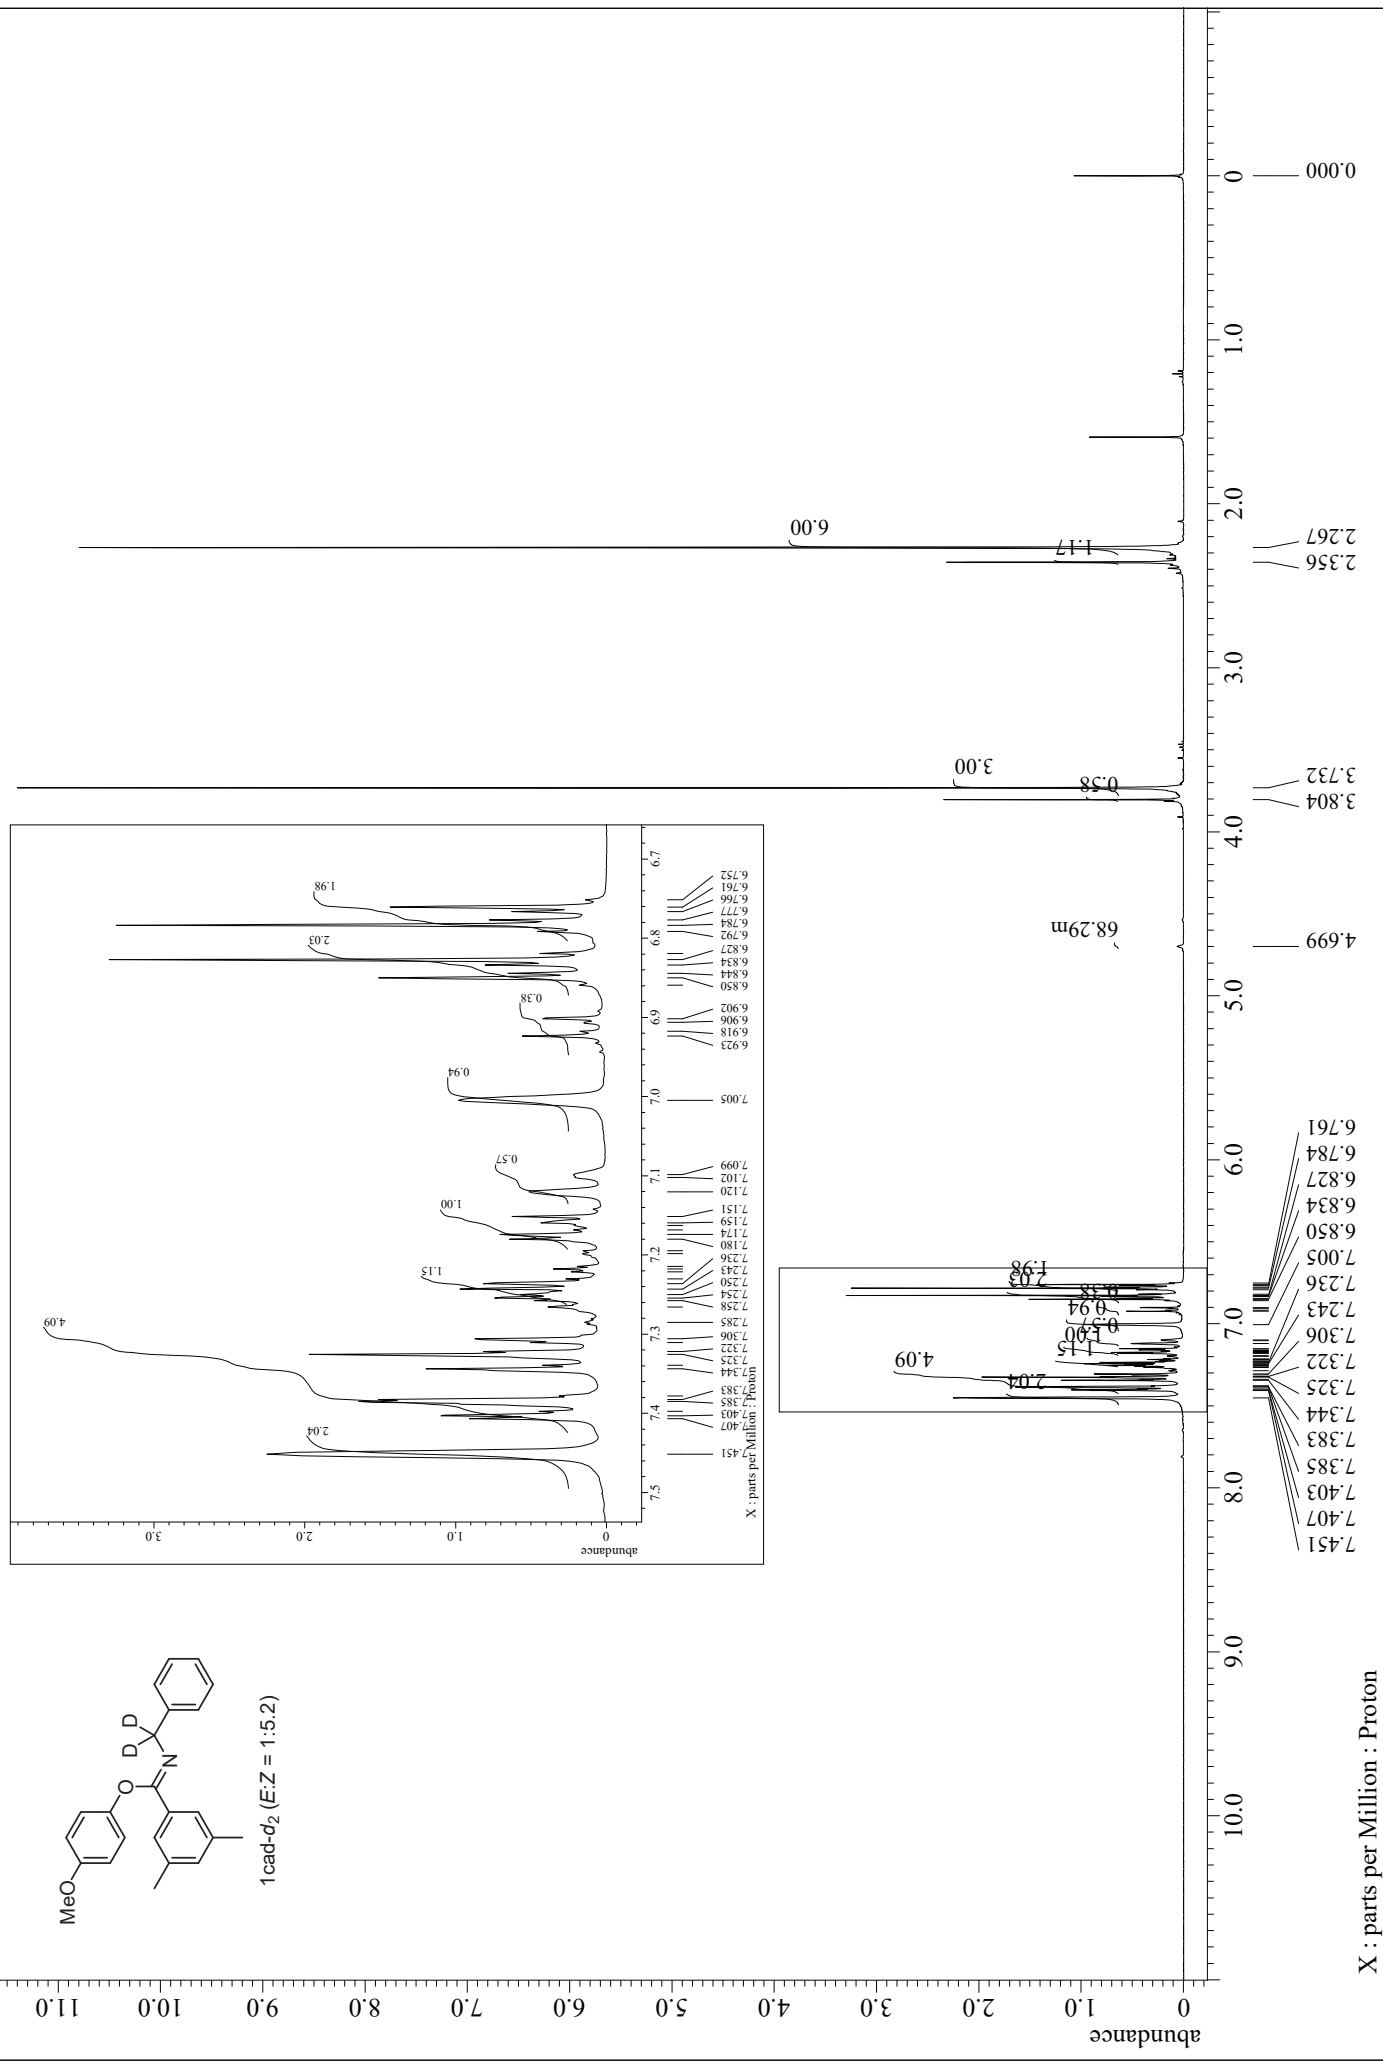

X : parts per Million : Proton

<sup>13</sup>C NMR (101 MHz, CDCl<sub>3</sub>)

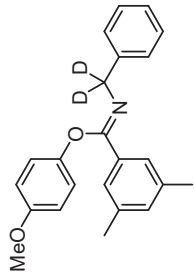

1<sub>o</sub>ad-d<sub>2</sub> (E:Z = 1:5.2)

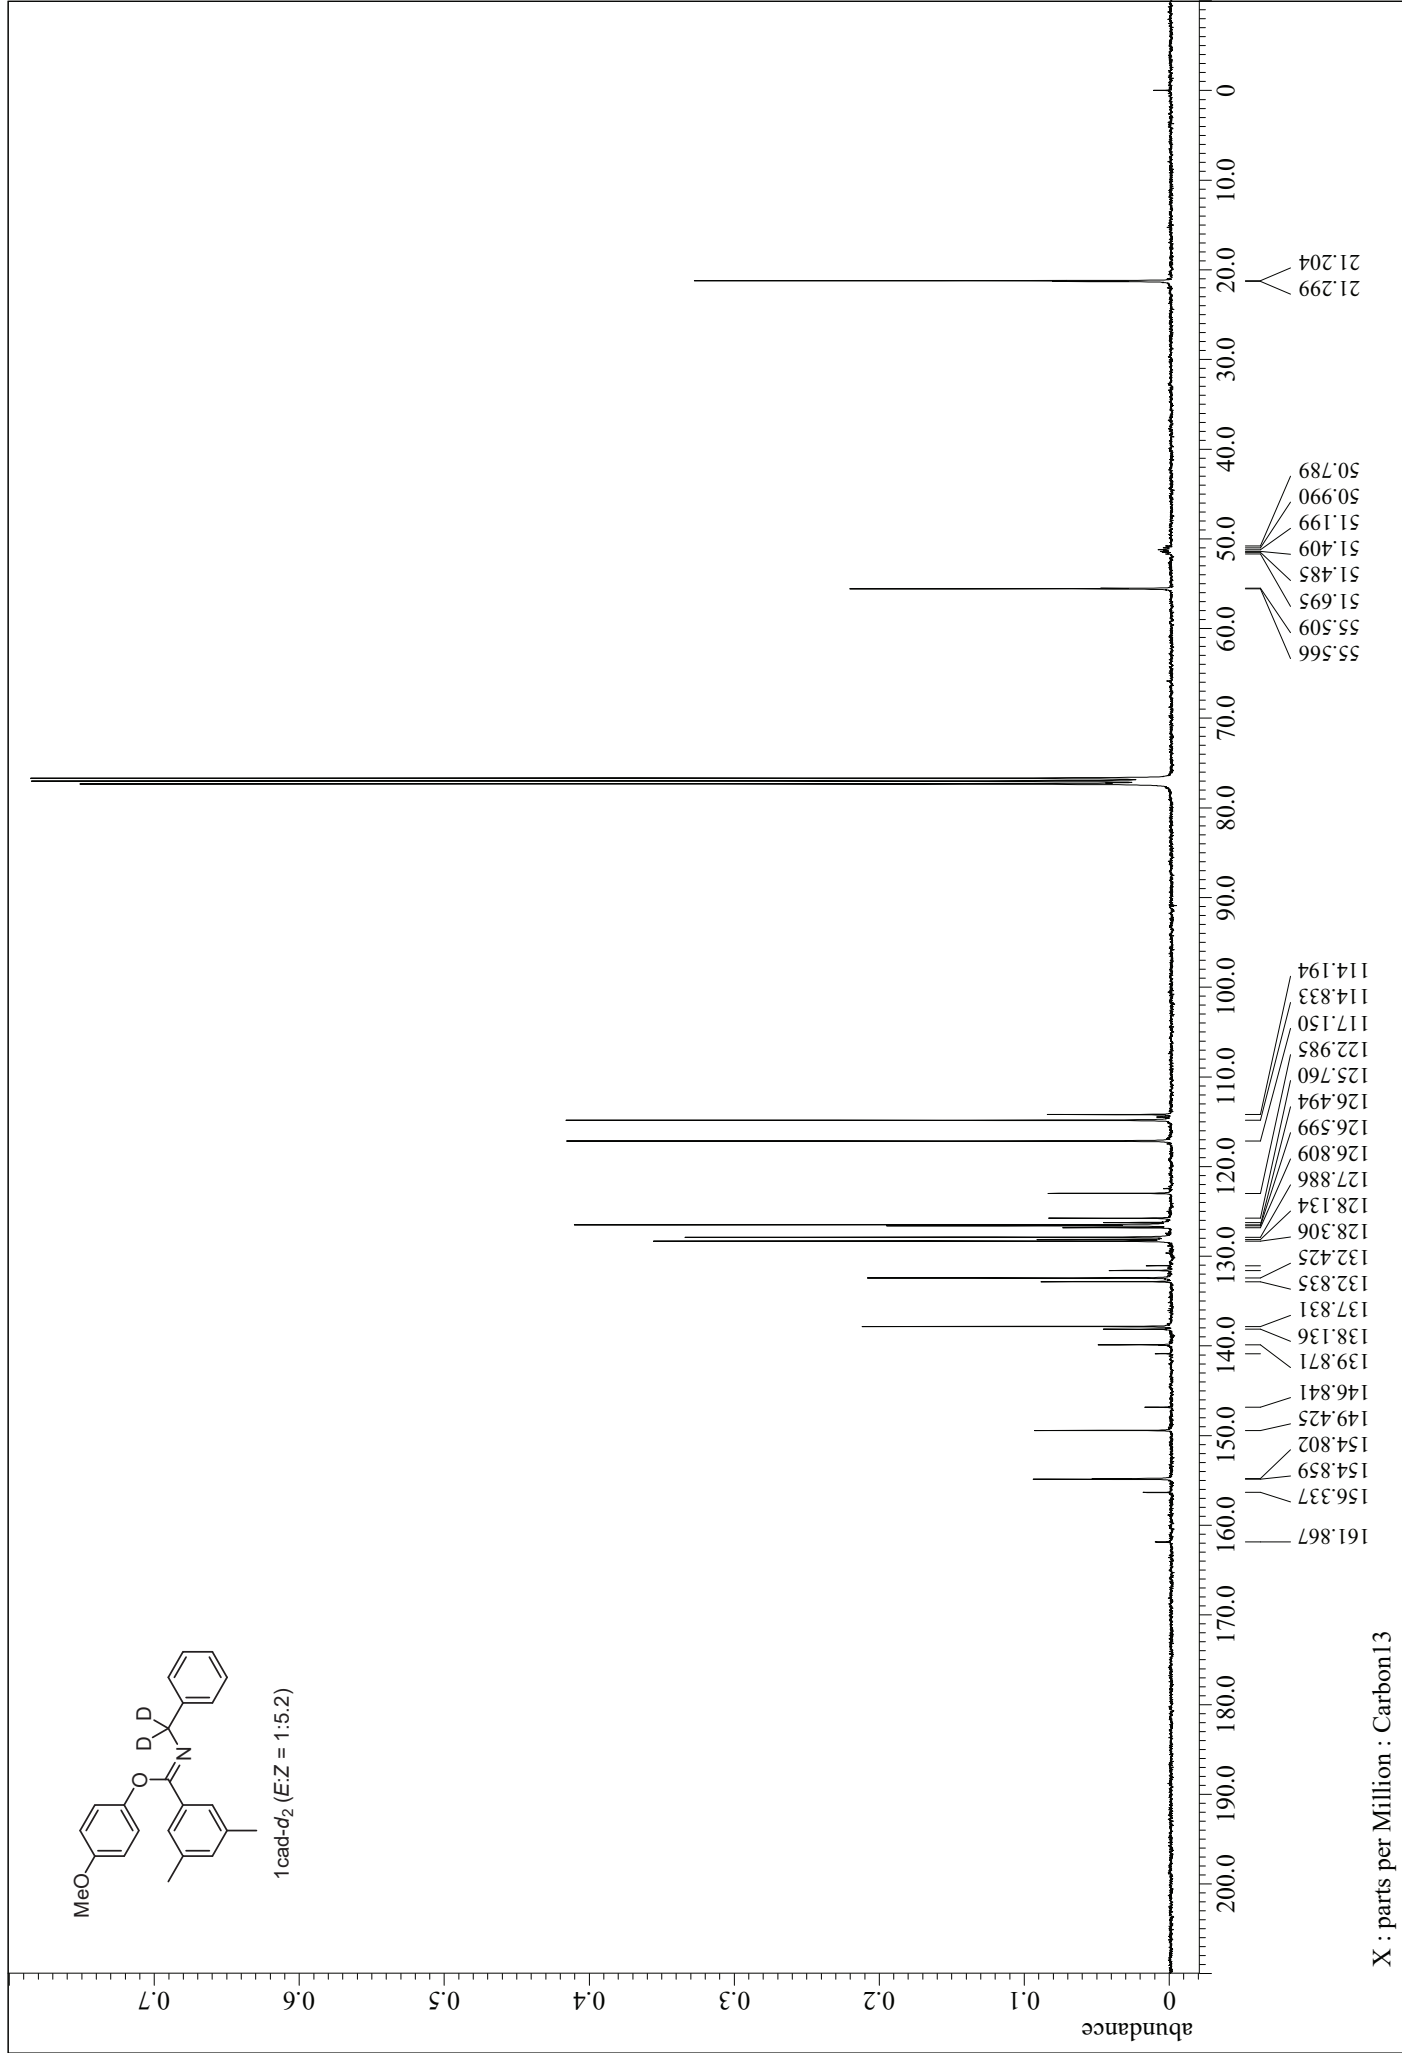

X : parts per Million : Carbon13

$^2\text{H}$  NMR (61.37 MHz,  $\text{CHCl}_3$ )

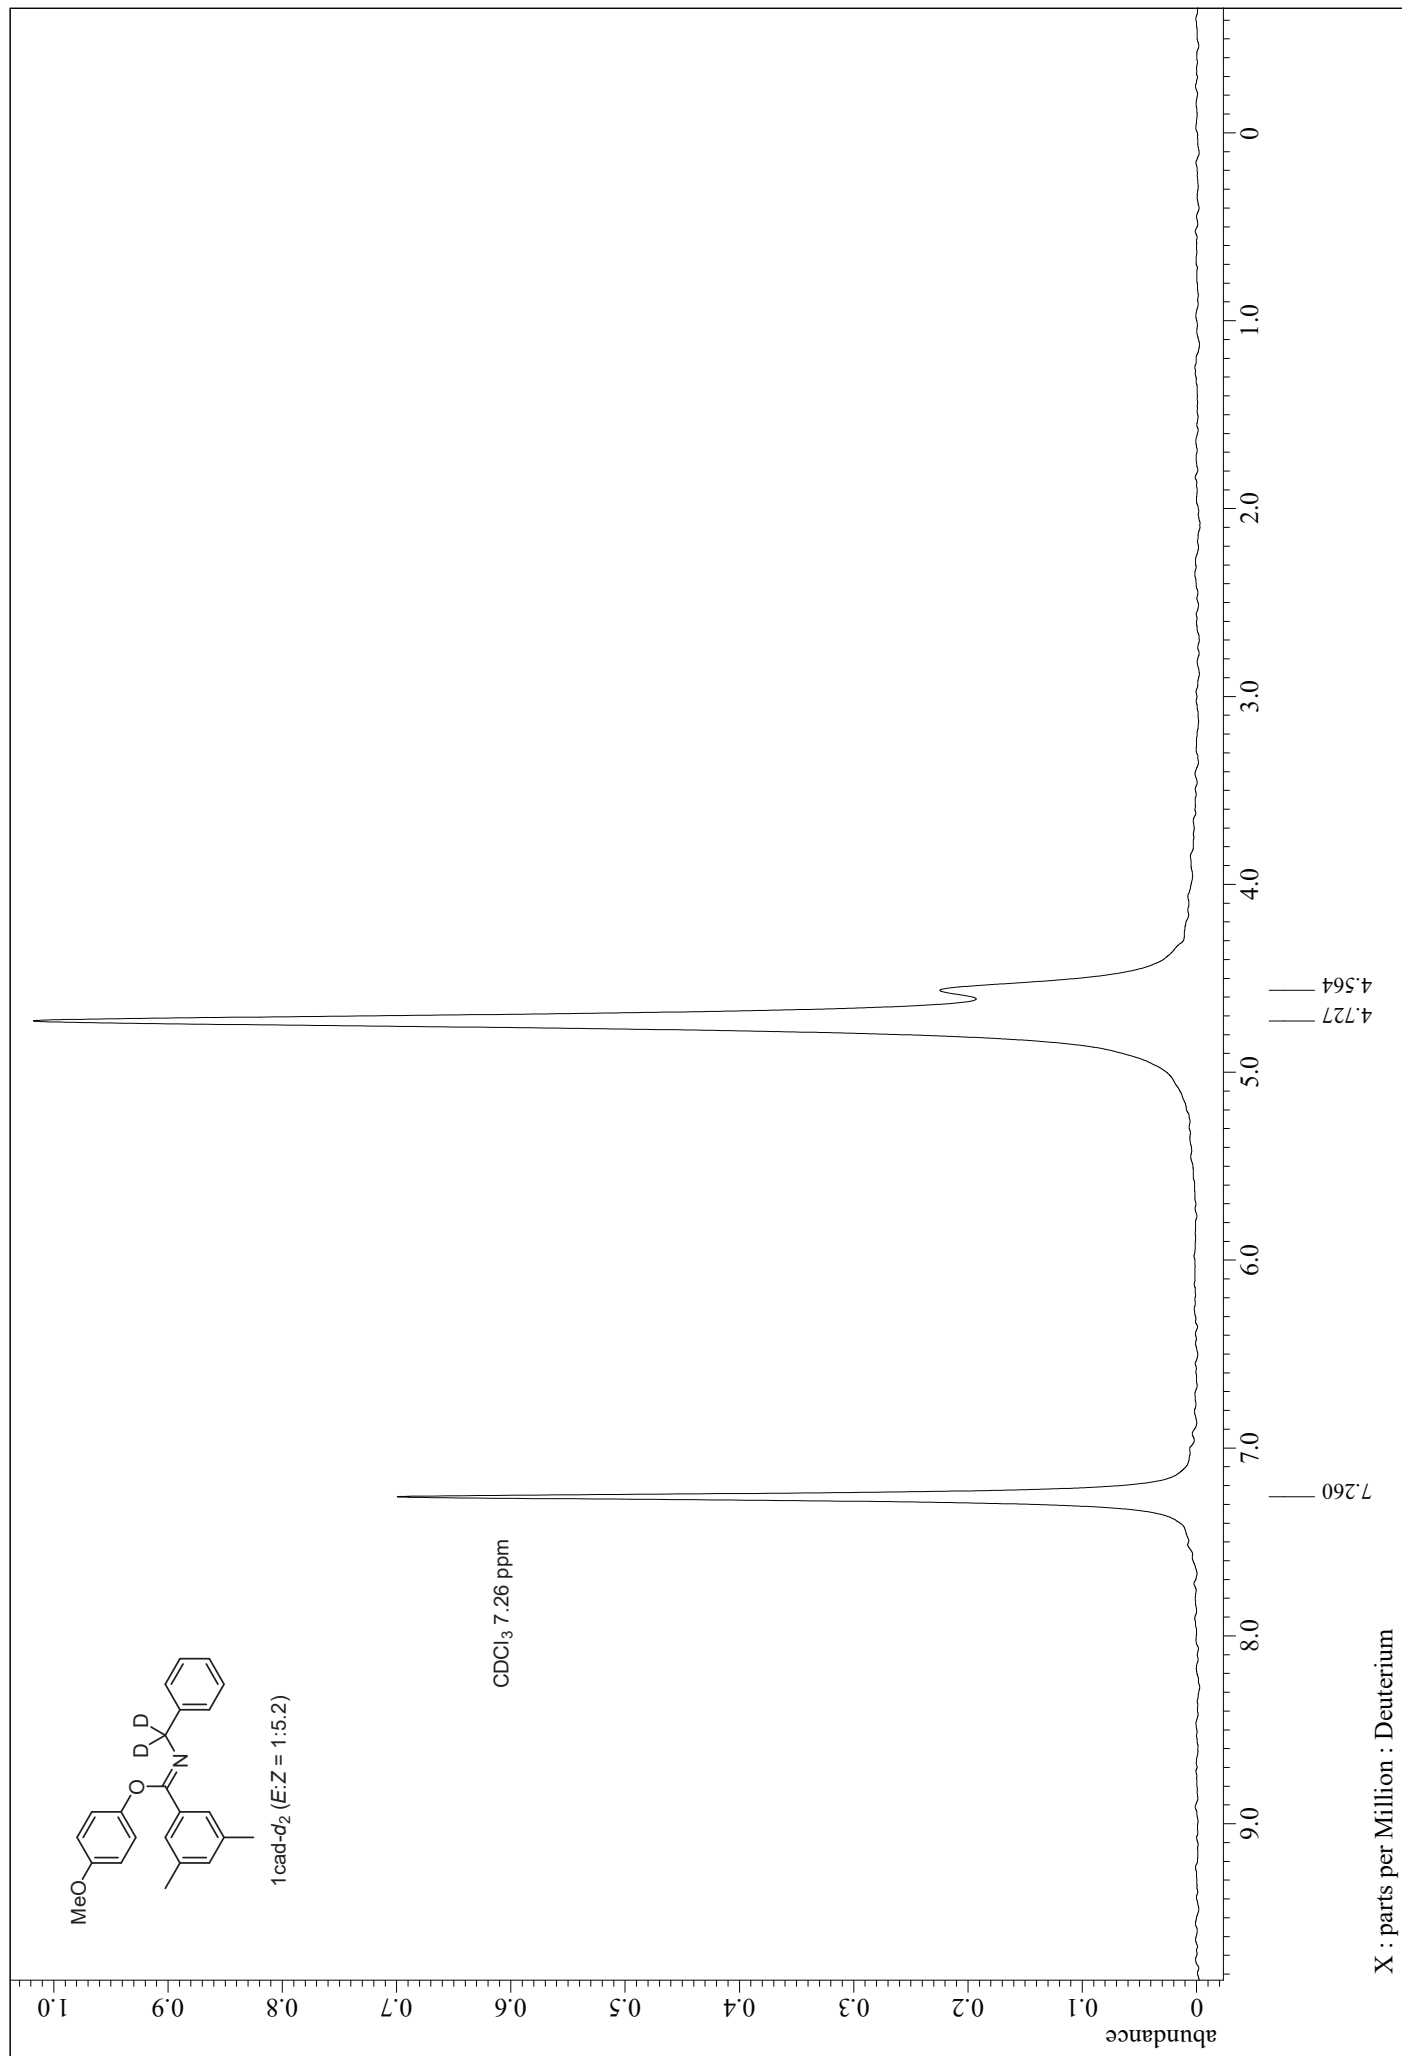

<sup>1</sup>H NMR (400 MHz, CDCl<sub>3</sub>)

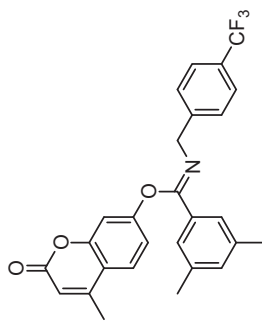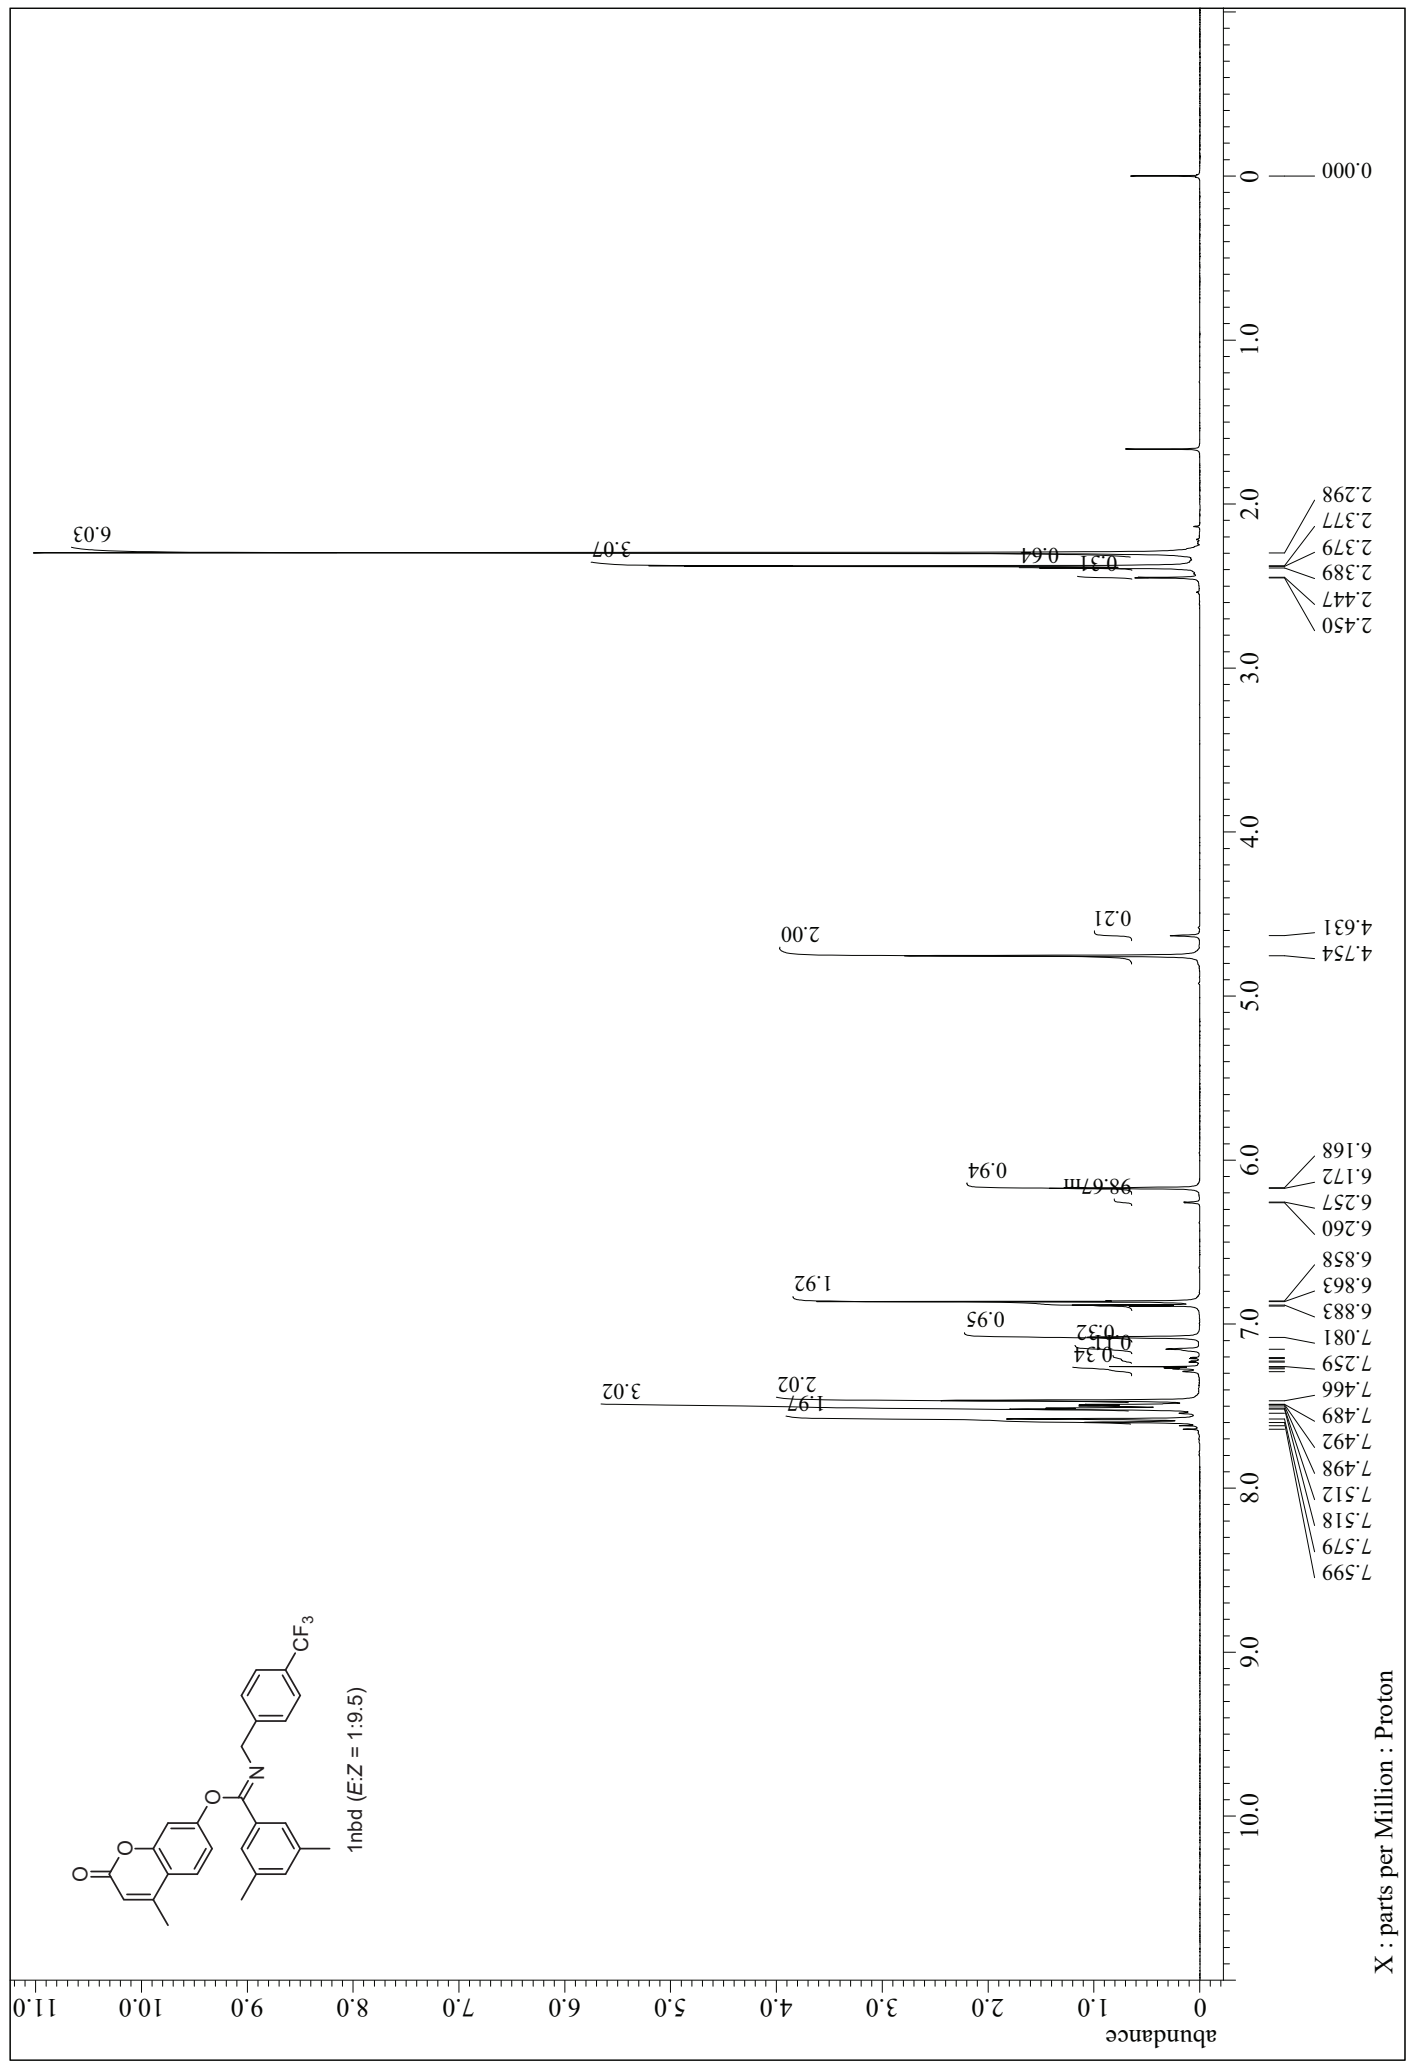

X : parts per Million : Proton

<sup>13</sup>C NMR (101 MHz, CDCl<sub>3</sub>)

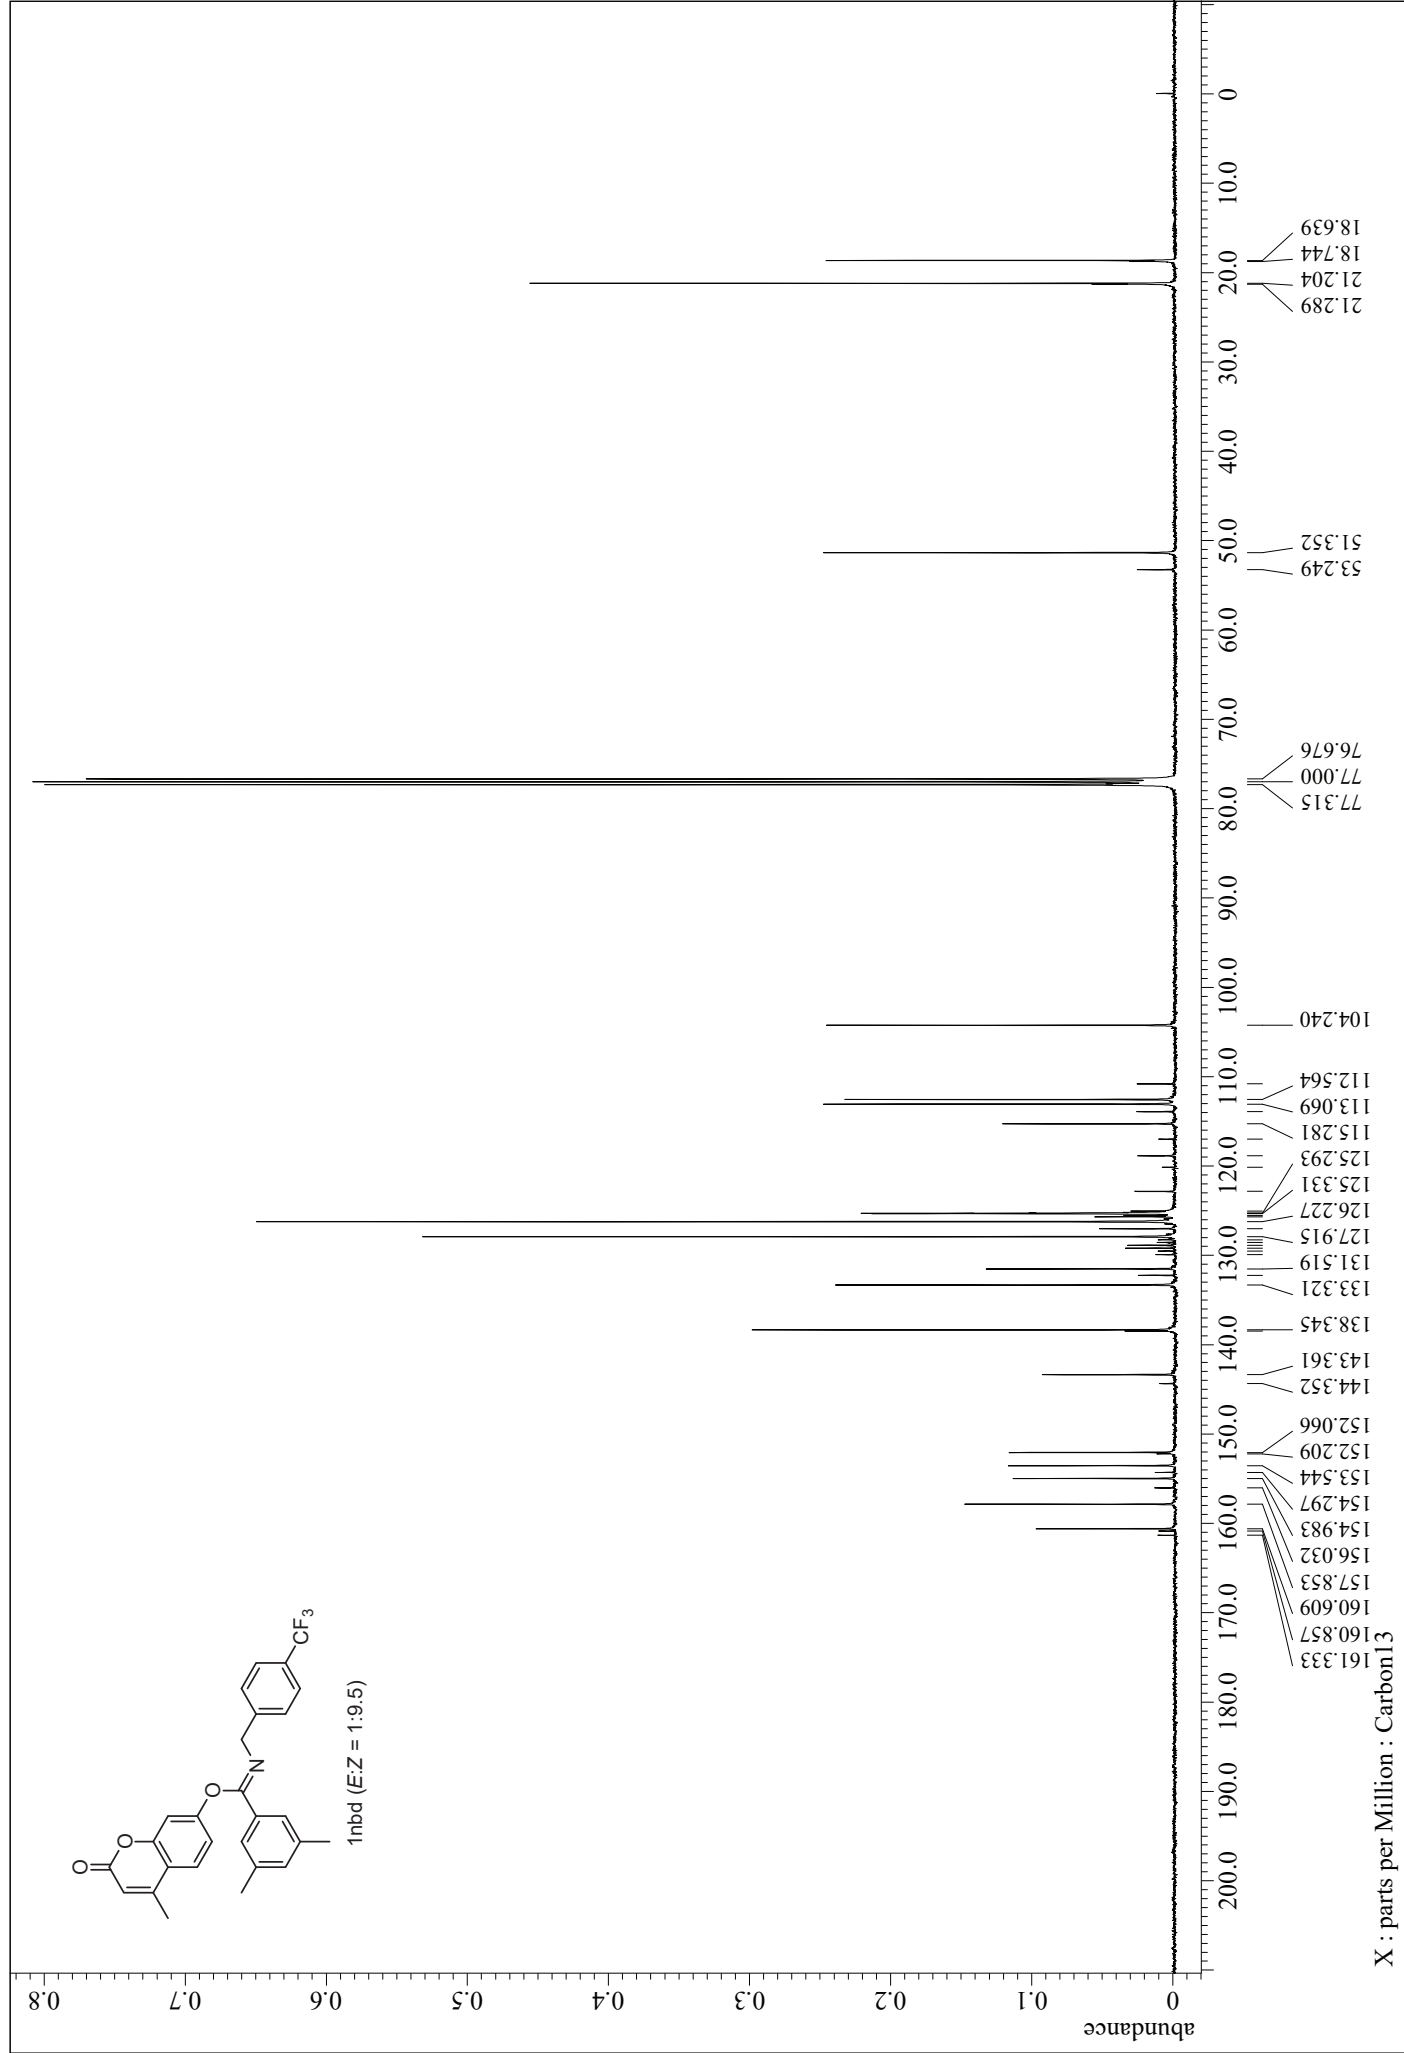

<sup>19</sup>F NMR (376 MHz, CDCl<sub>3</sub>)

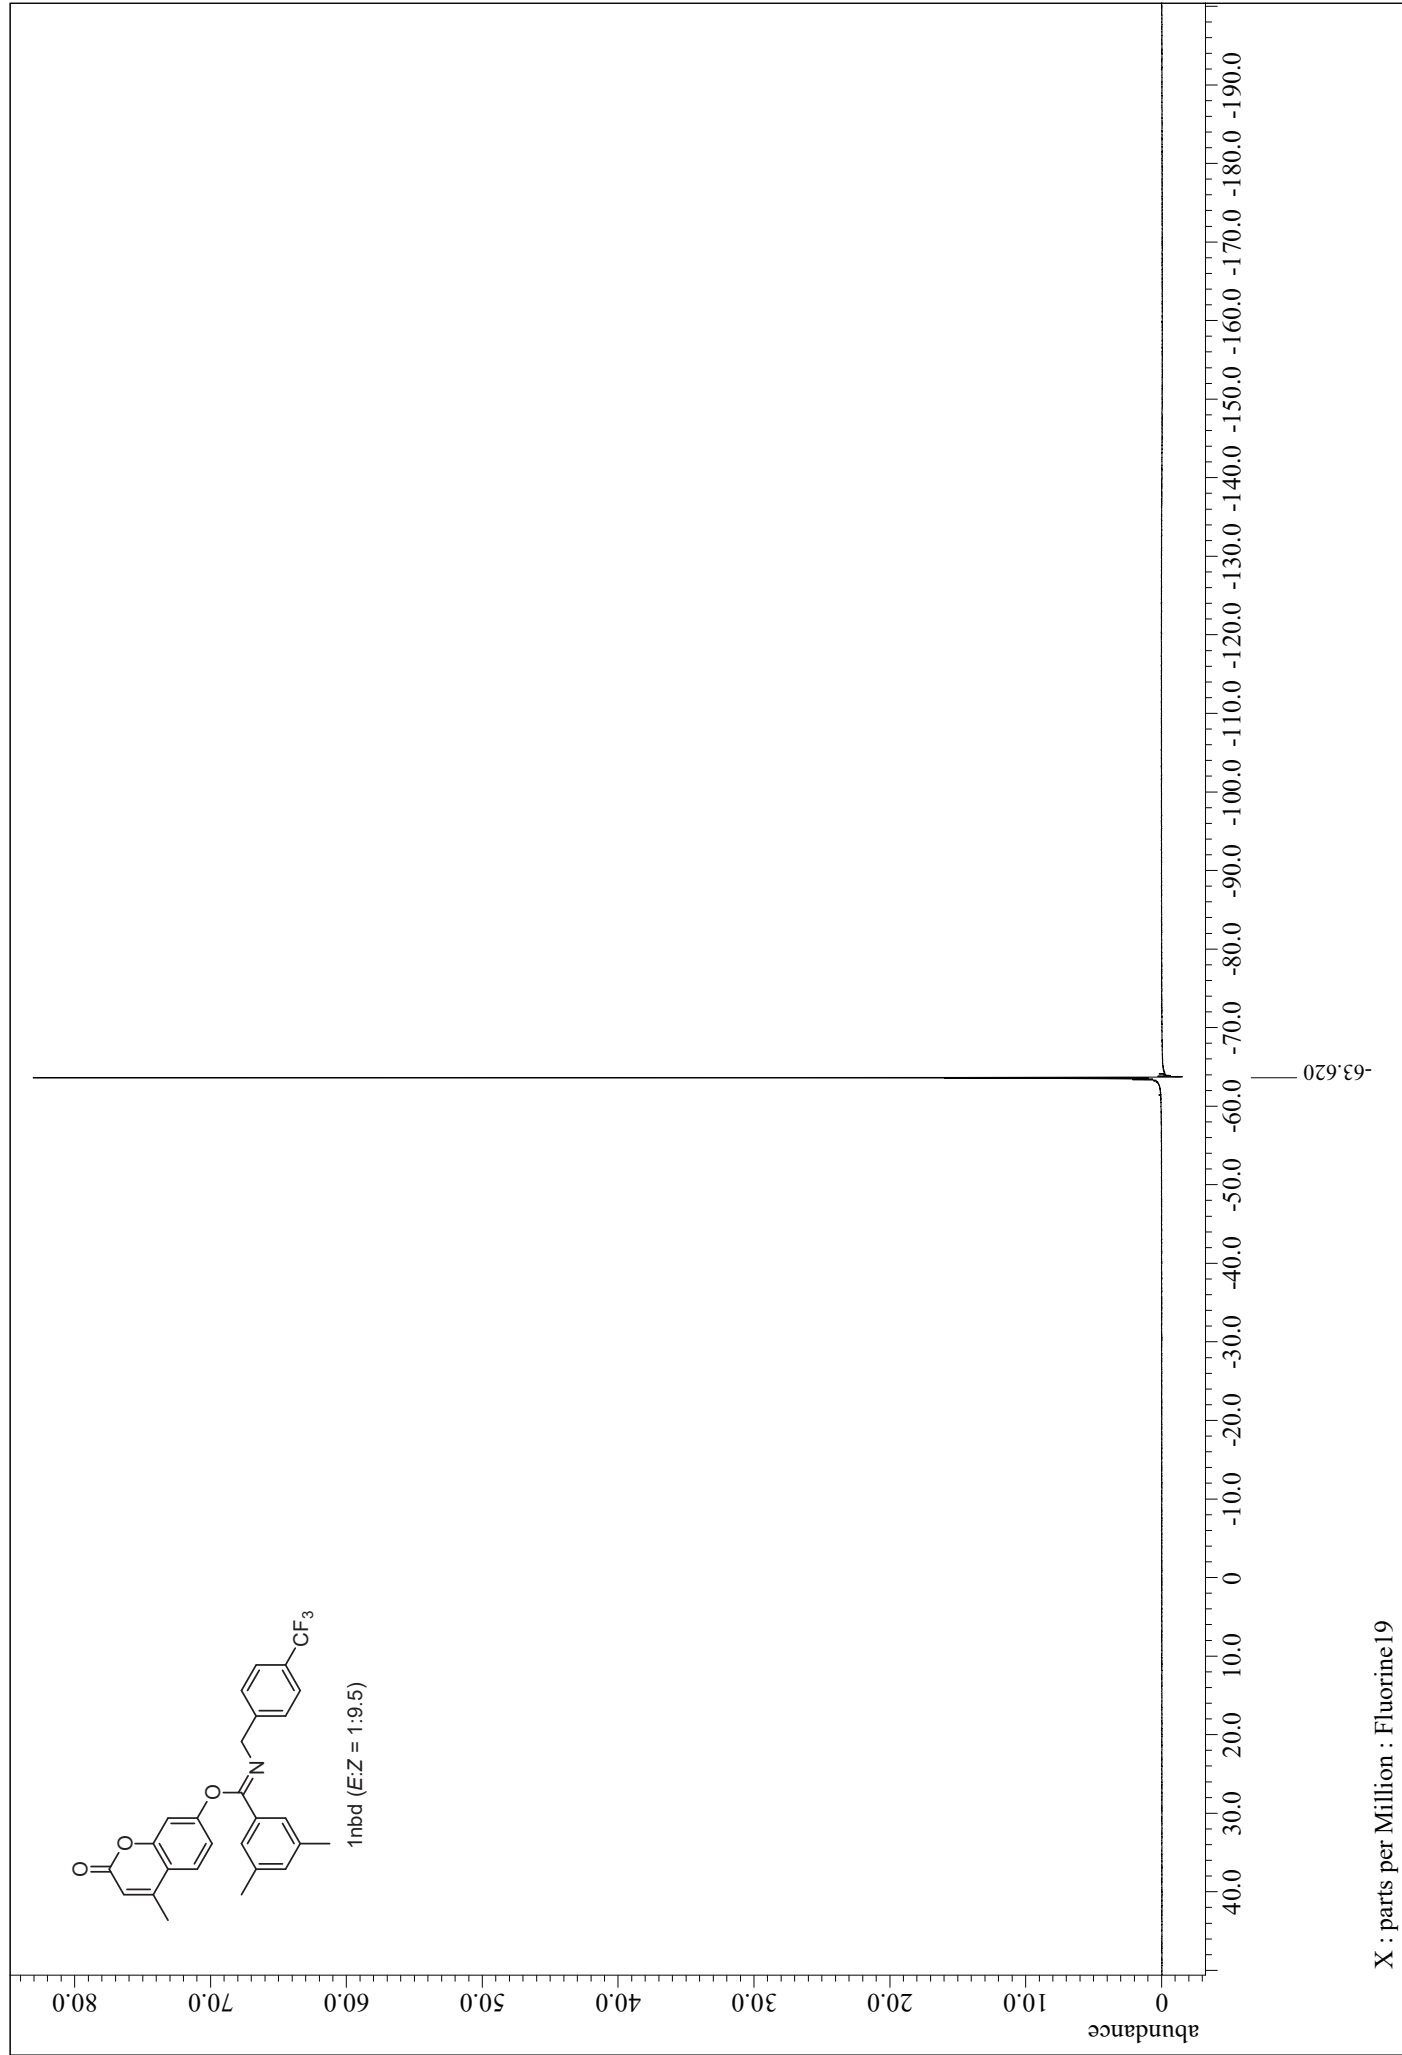



<sup>1</sup>H NMR (400 MHz, CDCl<sub>3</sub>)

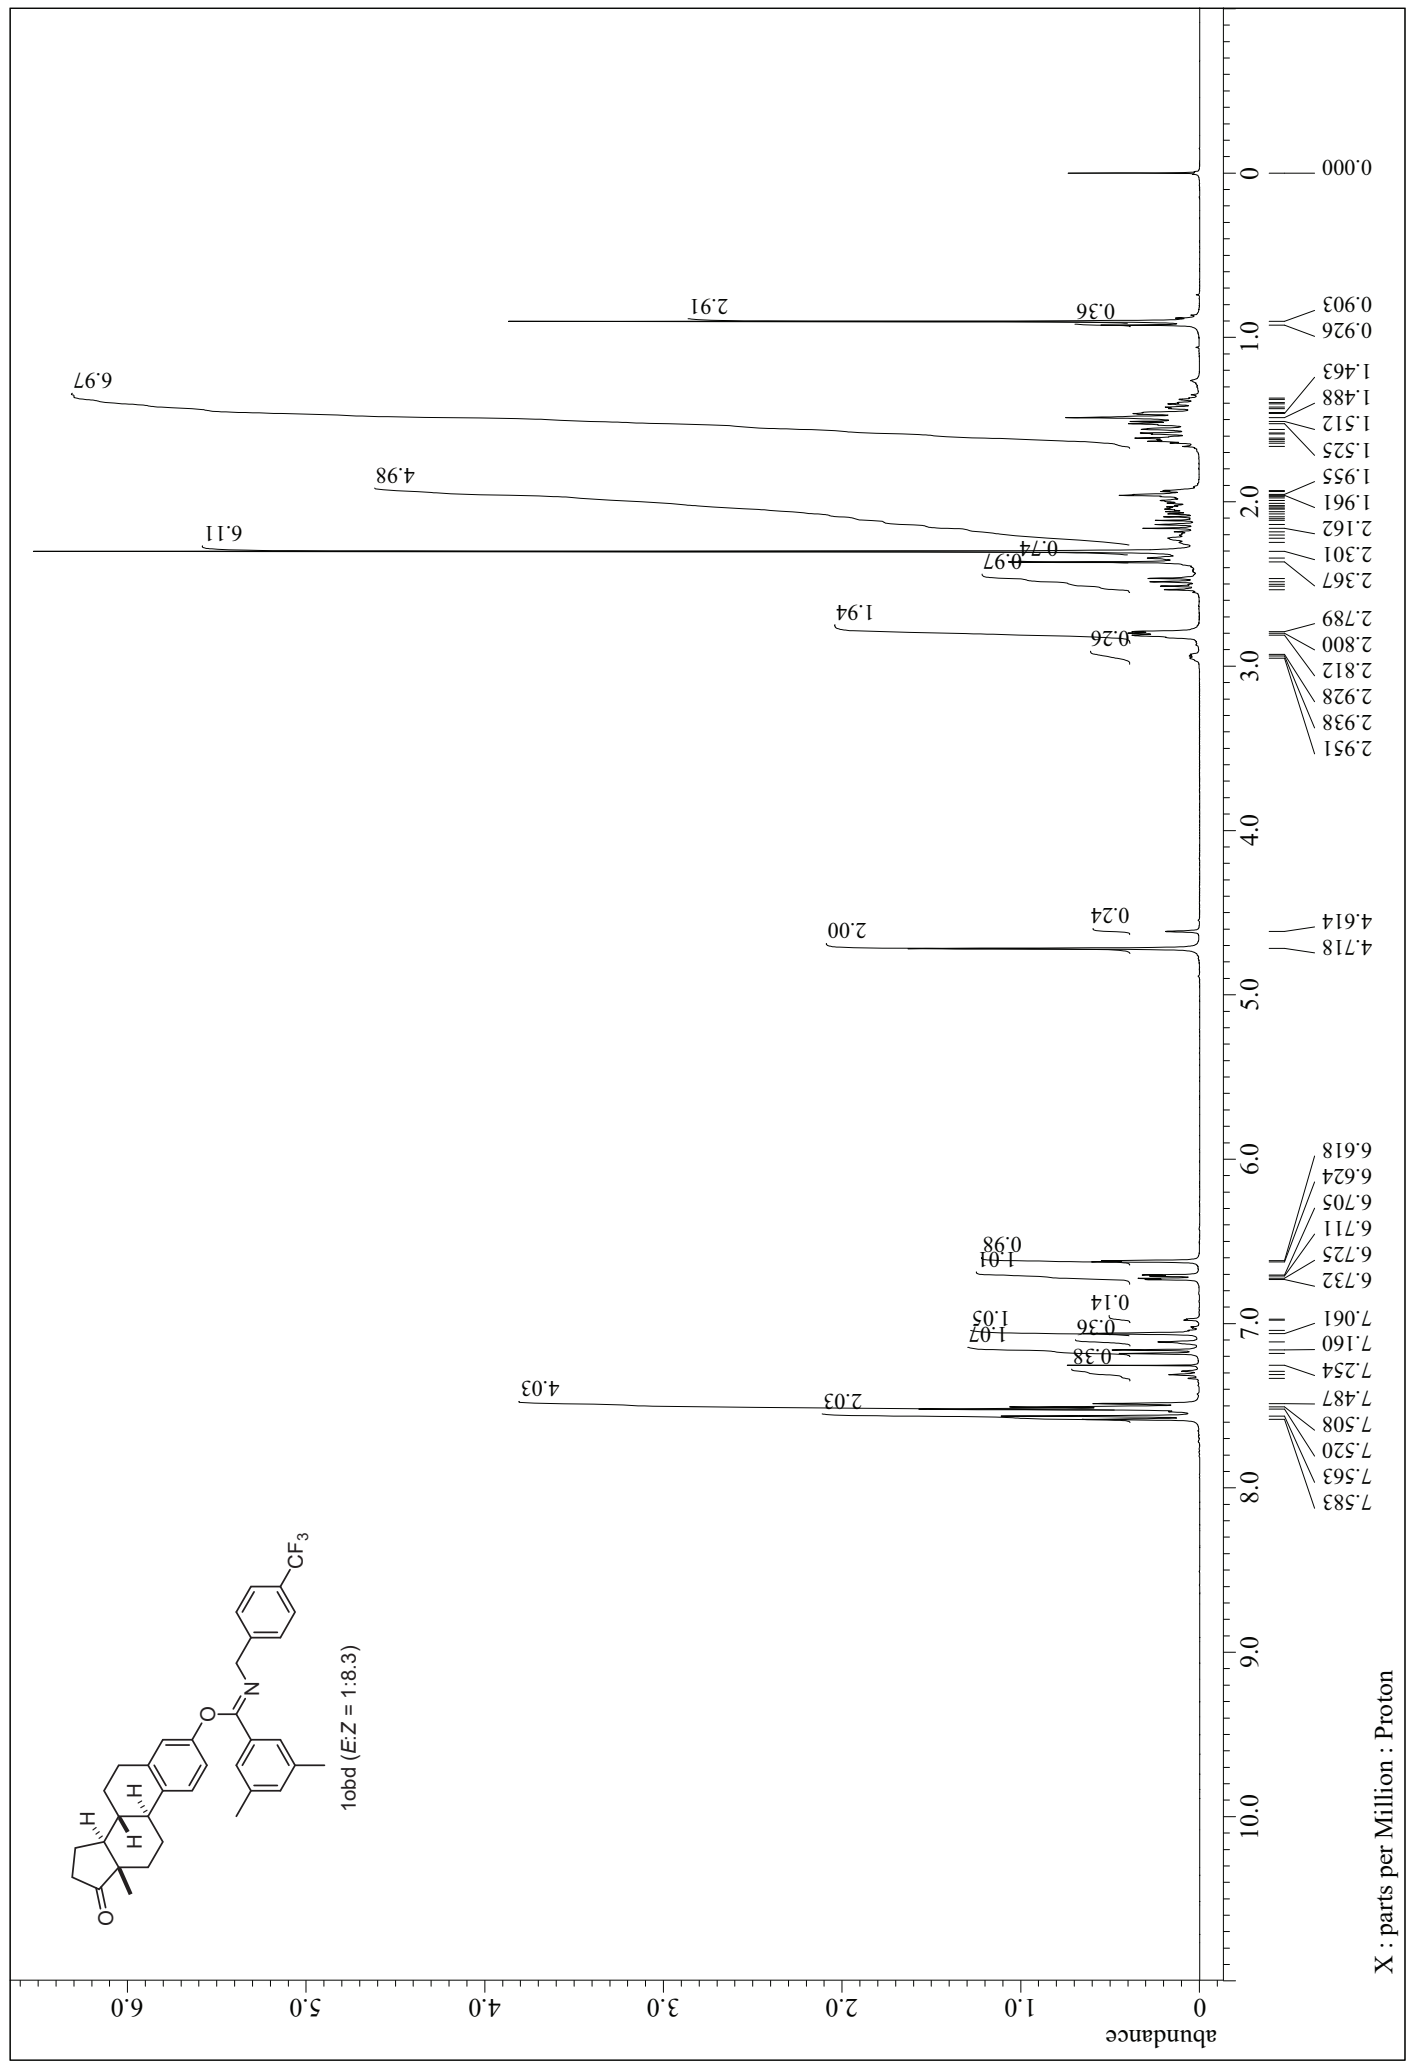

X : parts per Million : Proton

<sup>13</sup>C NMR (101 MHz, CDCl<sub>3</sub>)

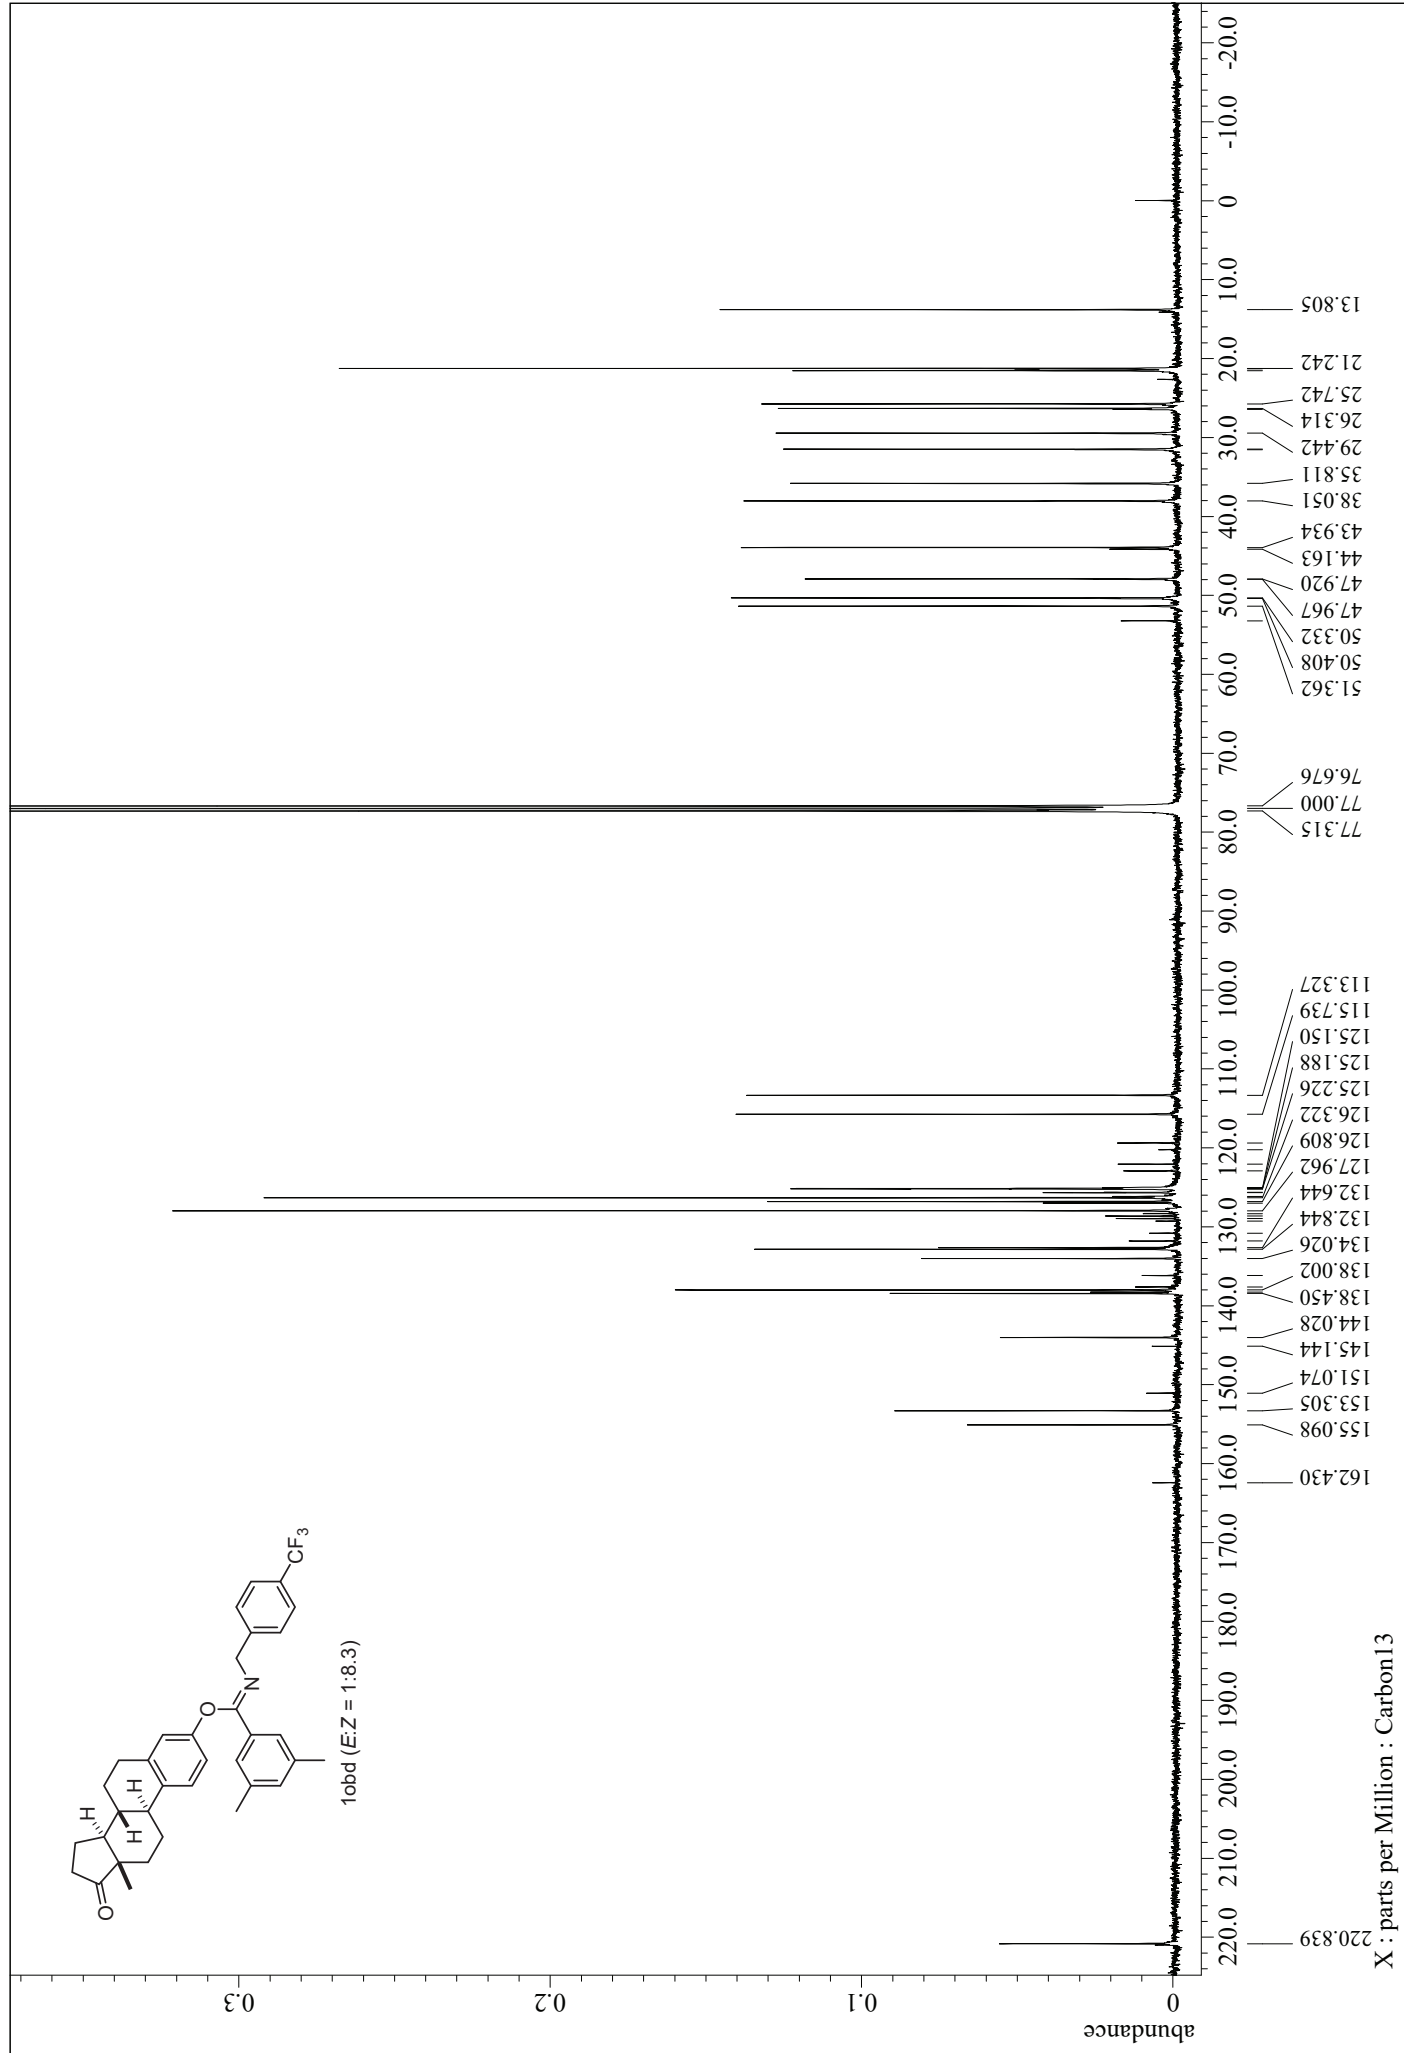

<sup>19</sup>F NMR (376 MHz, CDCl<sub>3</sub>)

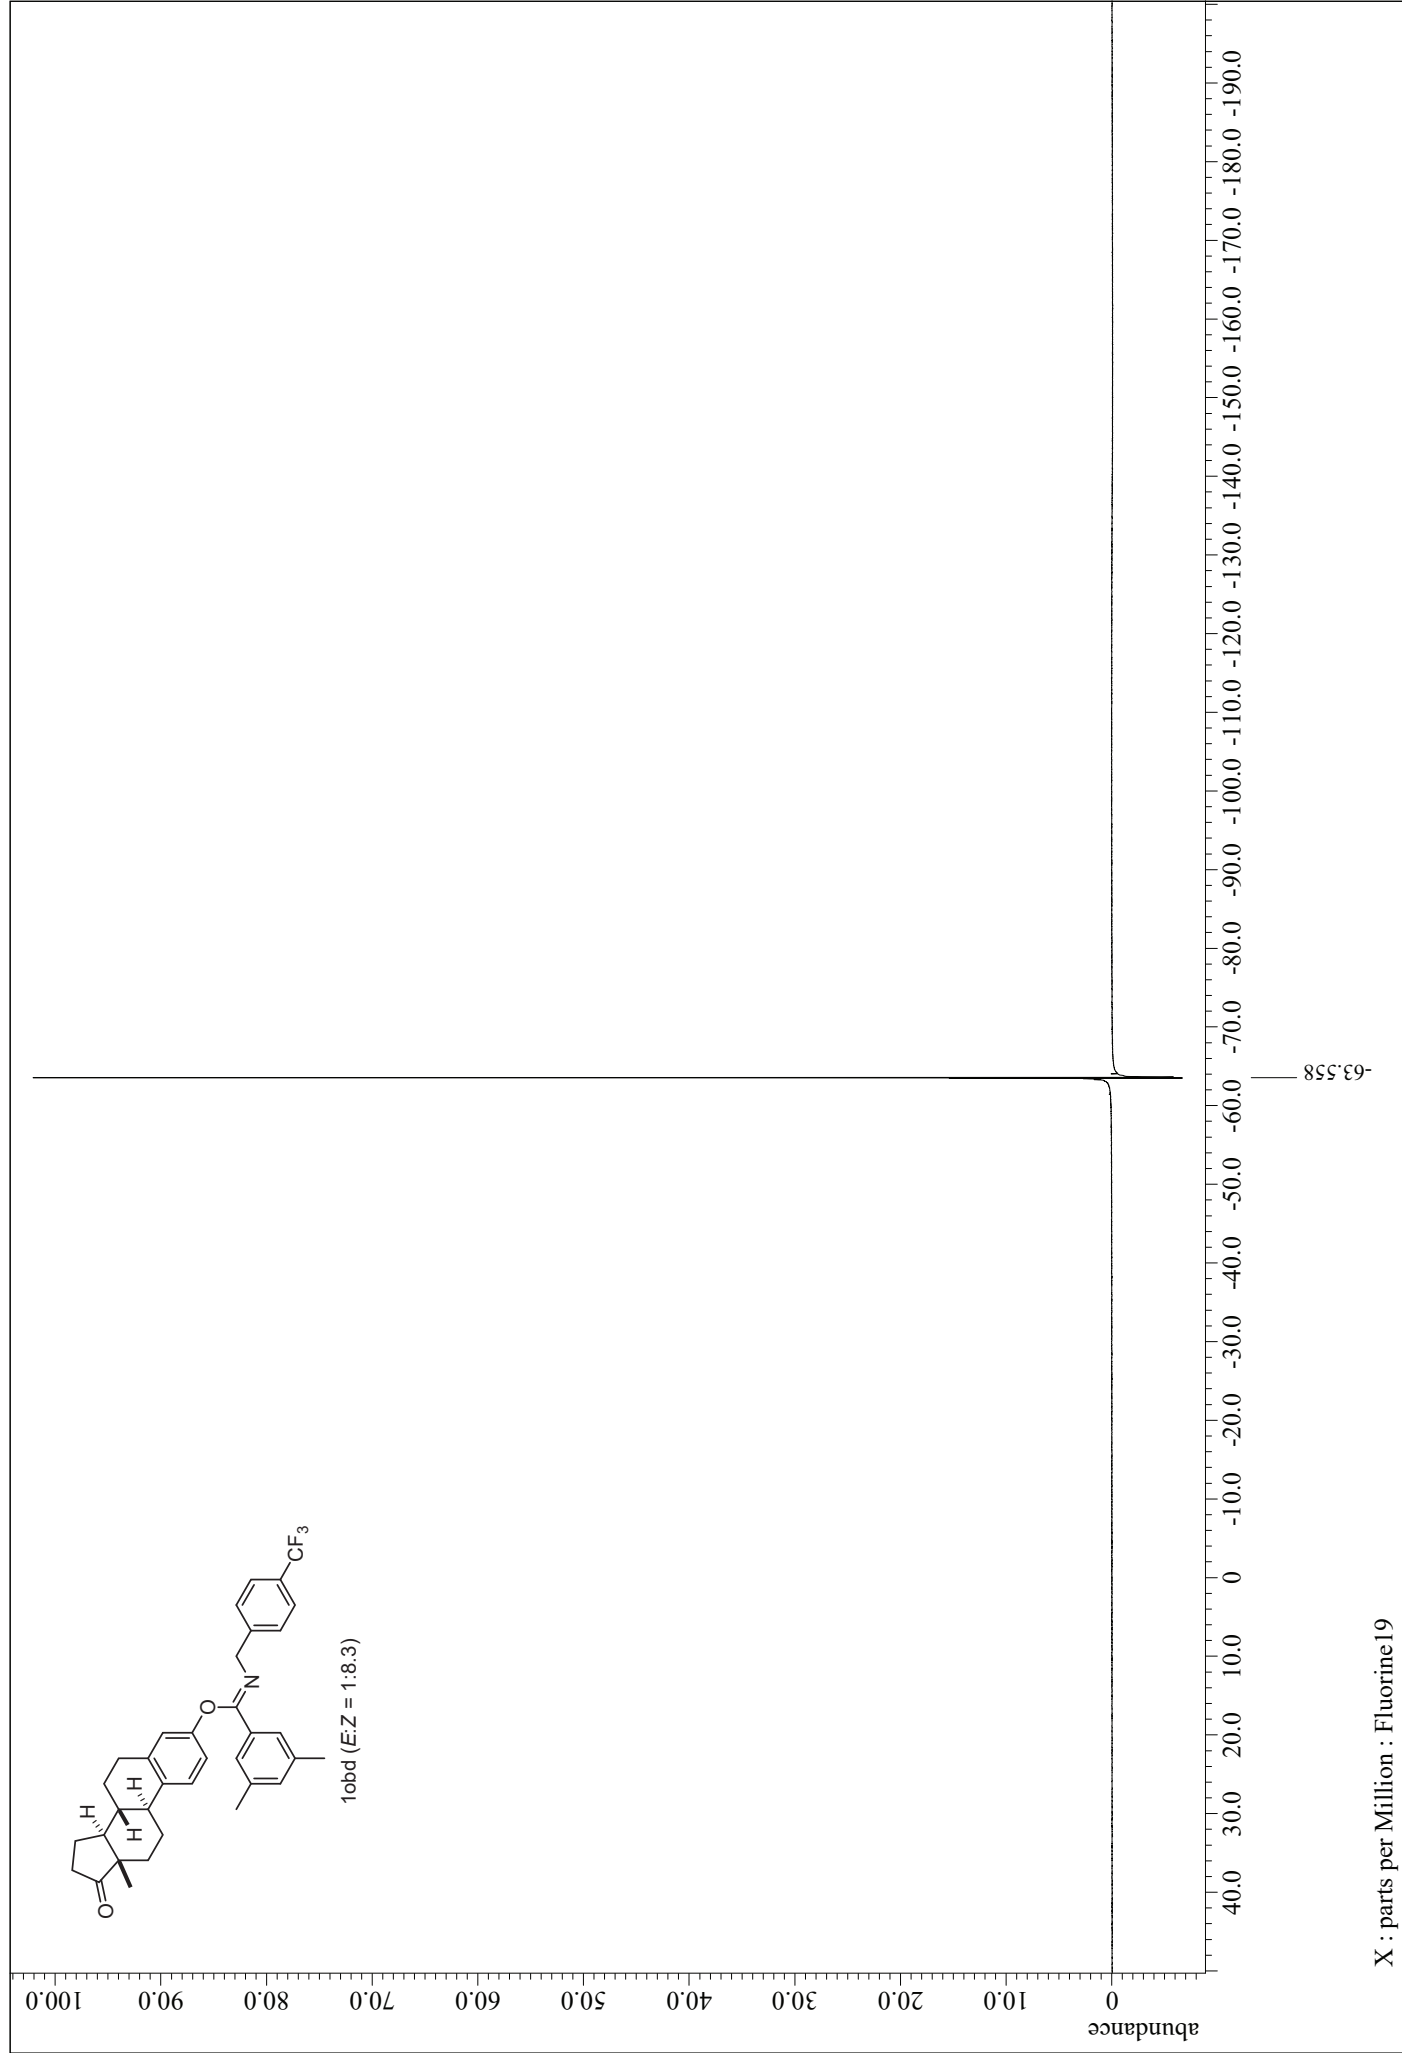

X : parts per Million : Fluorine 19

<sup>1</sup>H NMR (400 MHz, CDCl<sub>3</sub>)

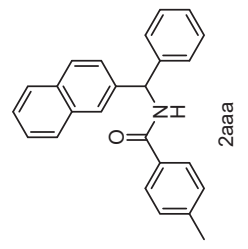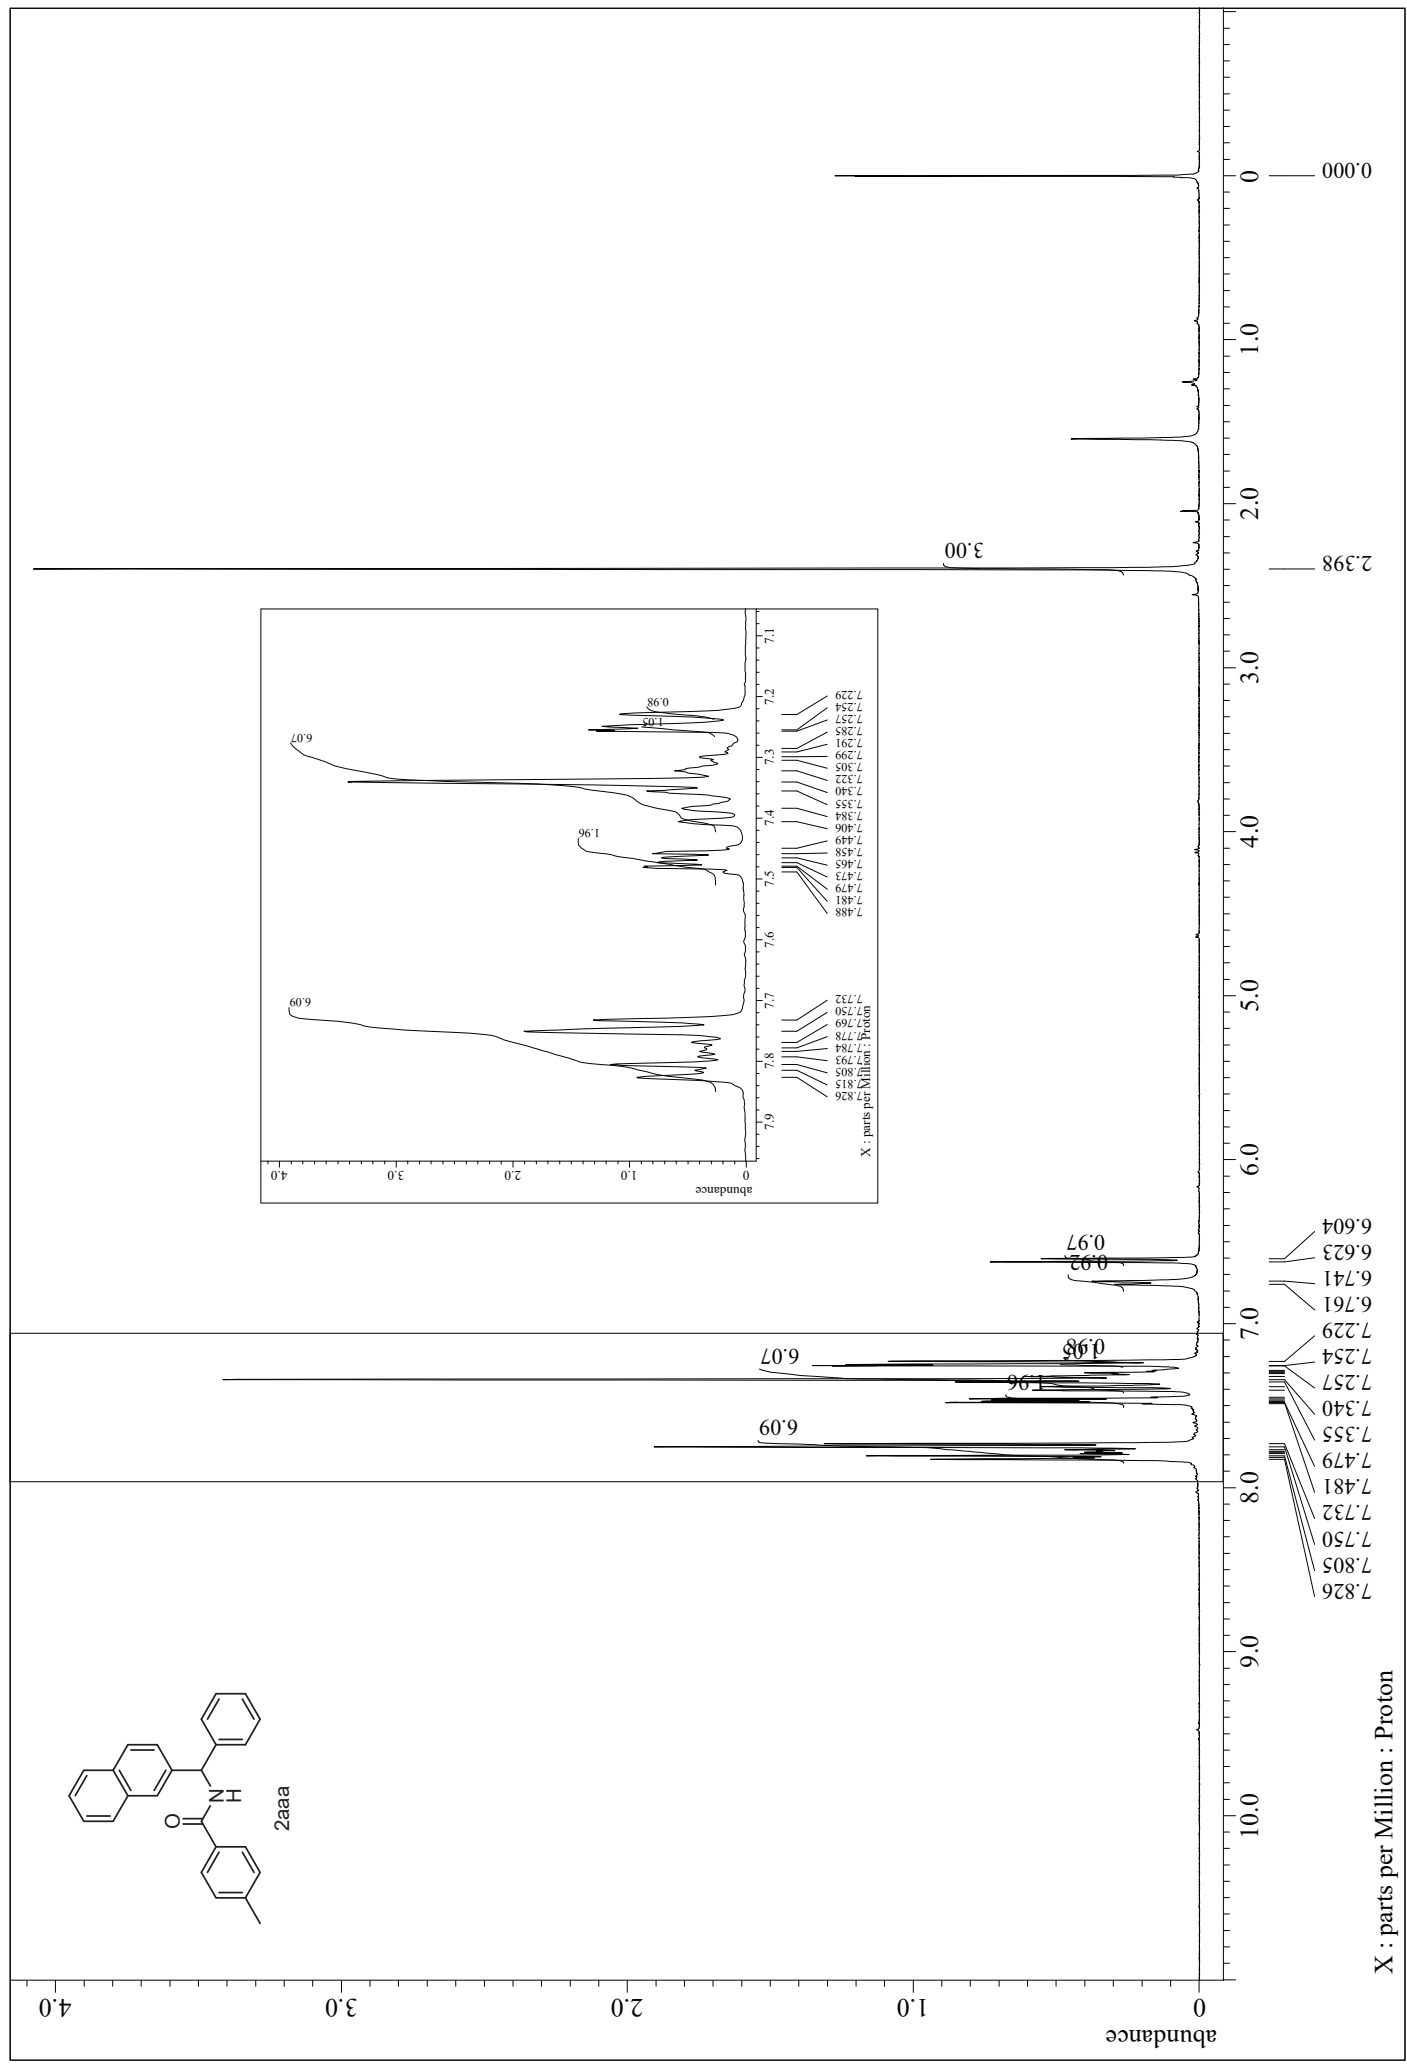

<sup>13</sup>C NMR (101 MHz, CDCl<sub>3</sub>)

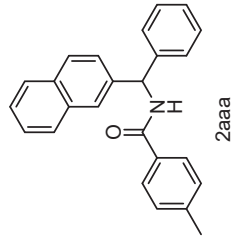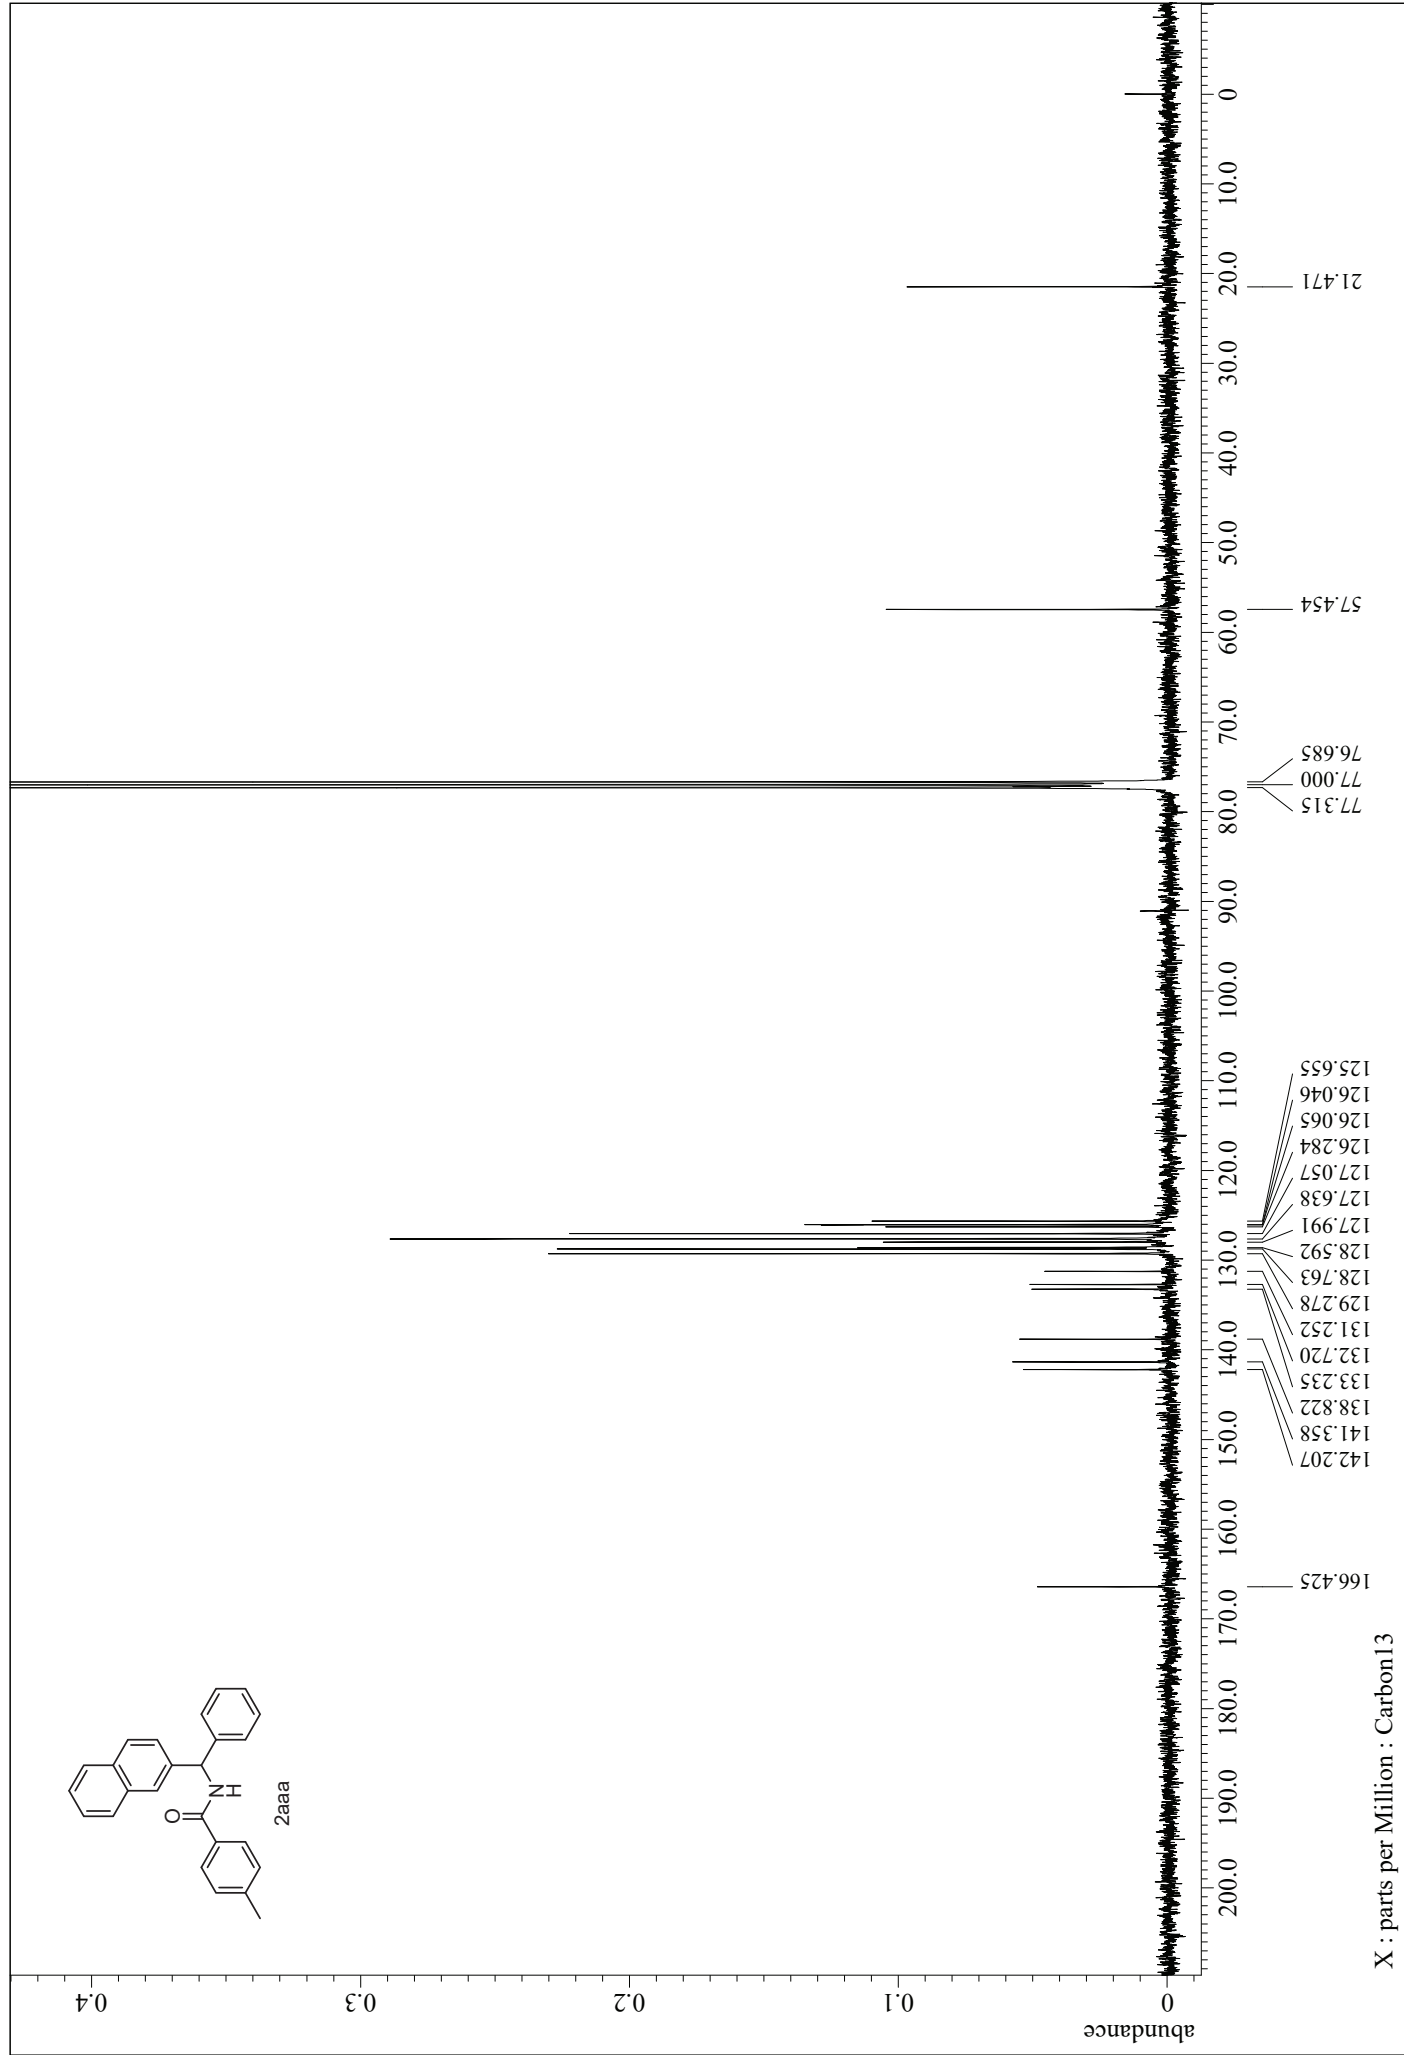

<sup>1</sup>H NMR (400 MHz, CDCl<sub>3</sub>)

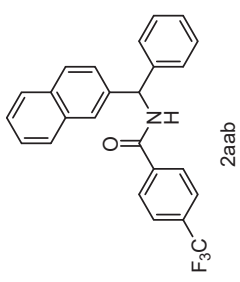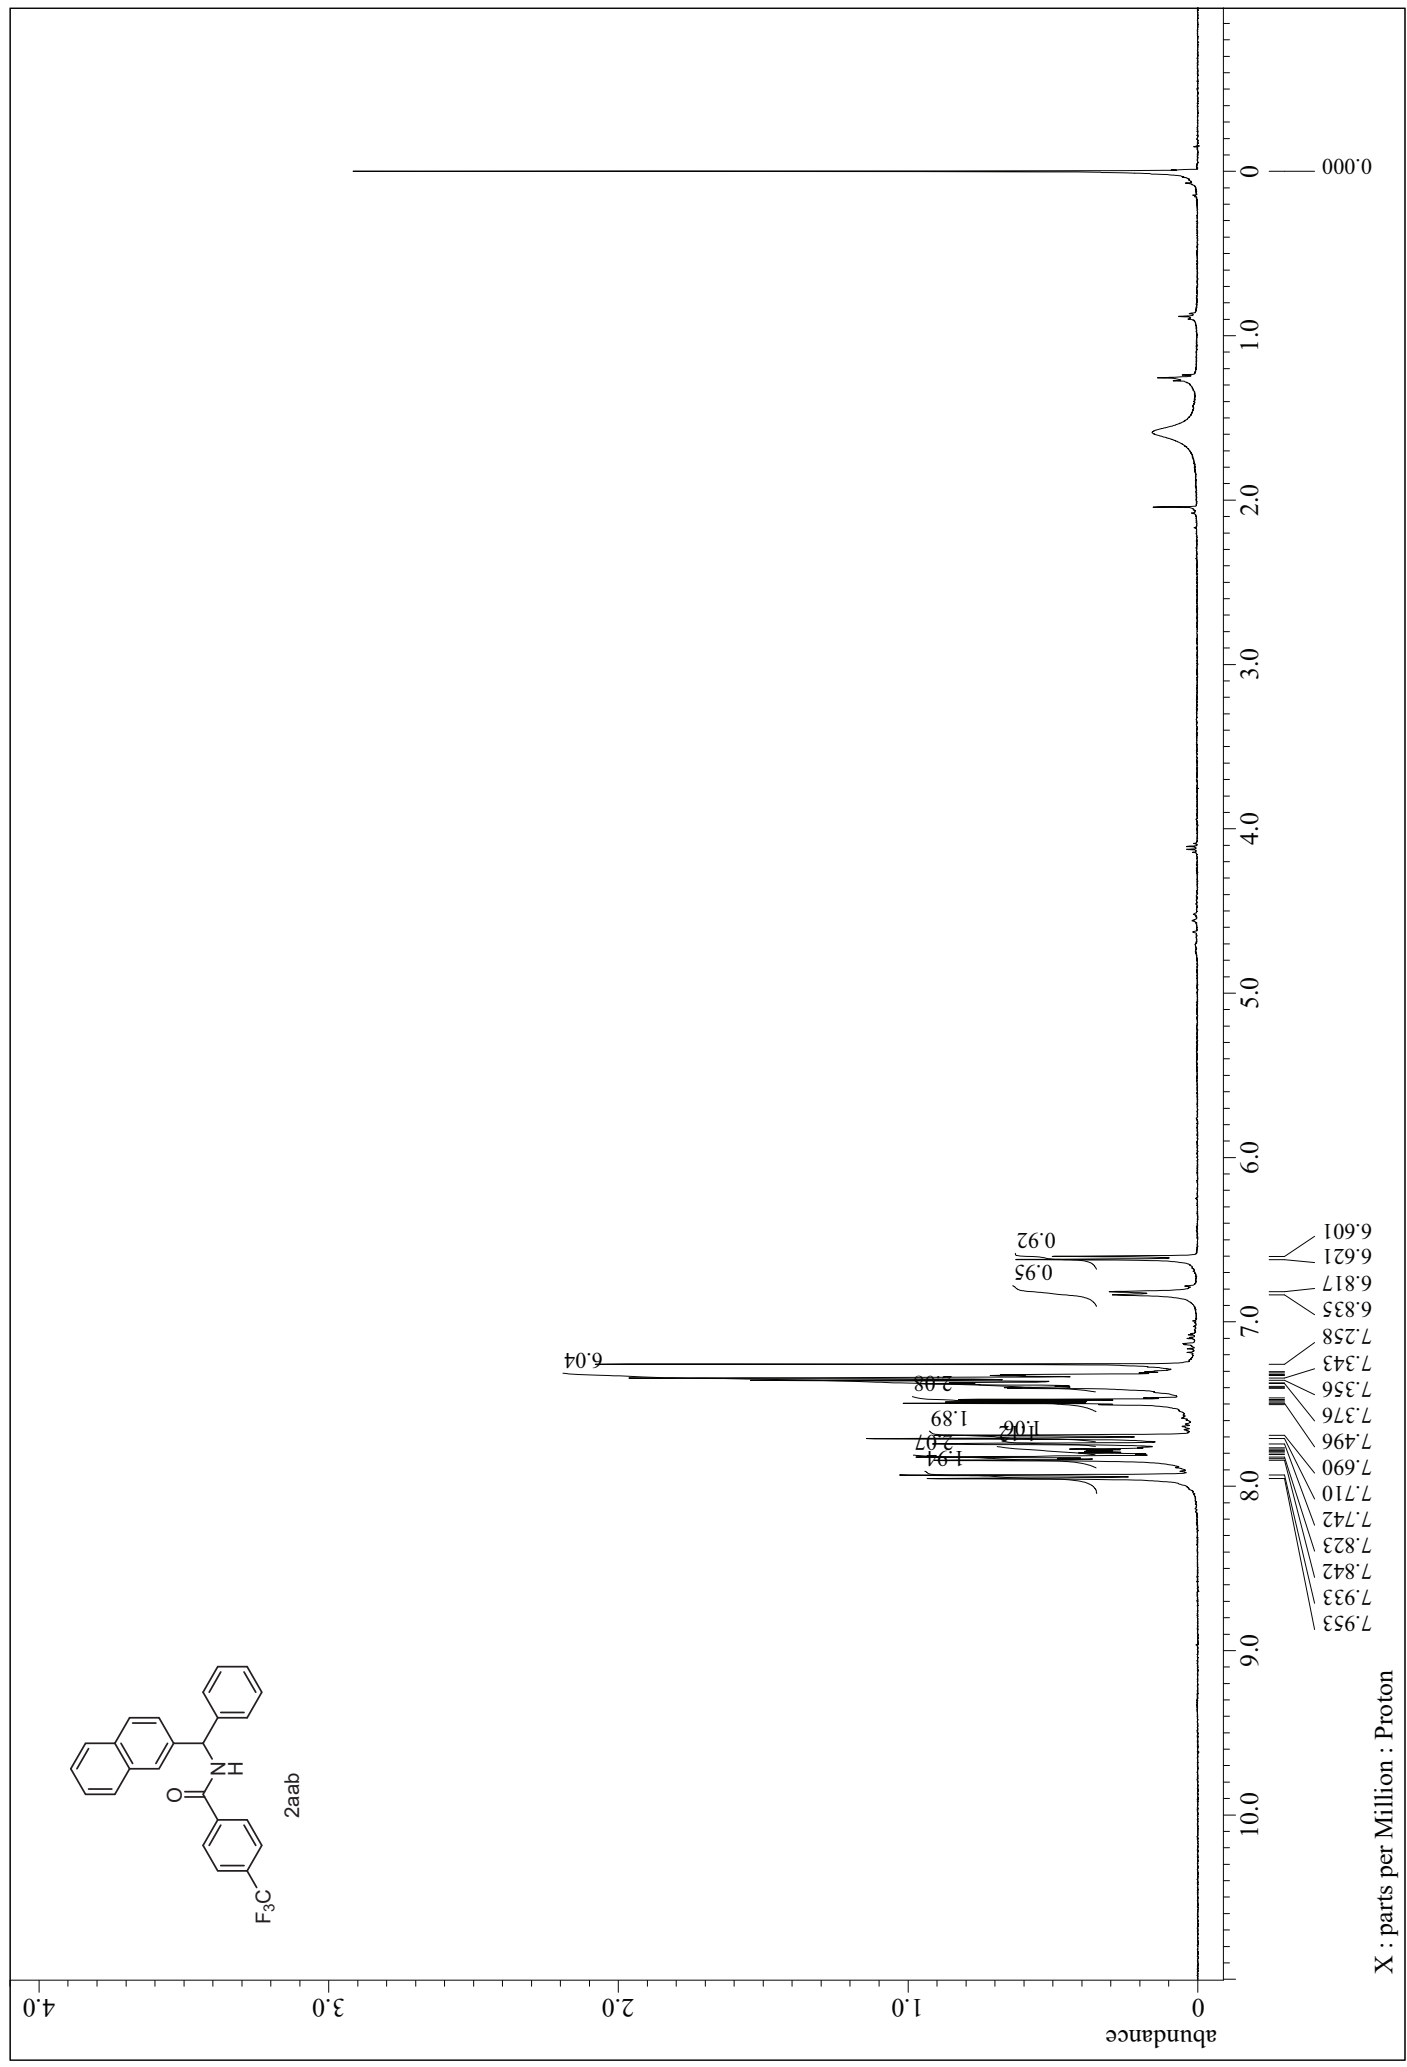

<sup>13</sup>C NMR (101 MHz, CDCl<sub>3</sub>)

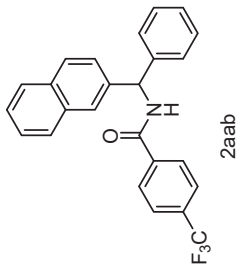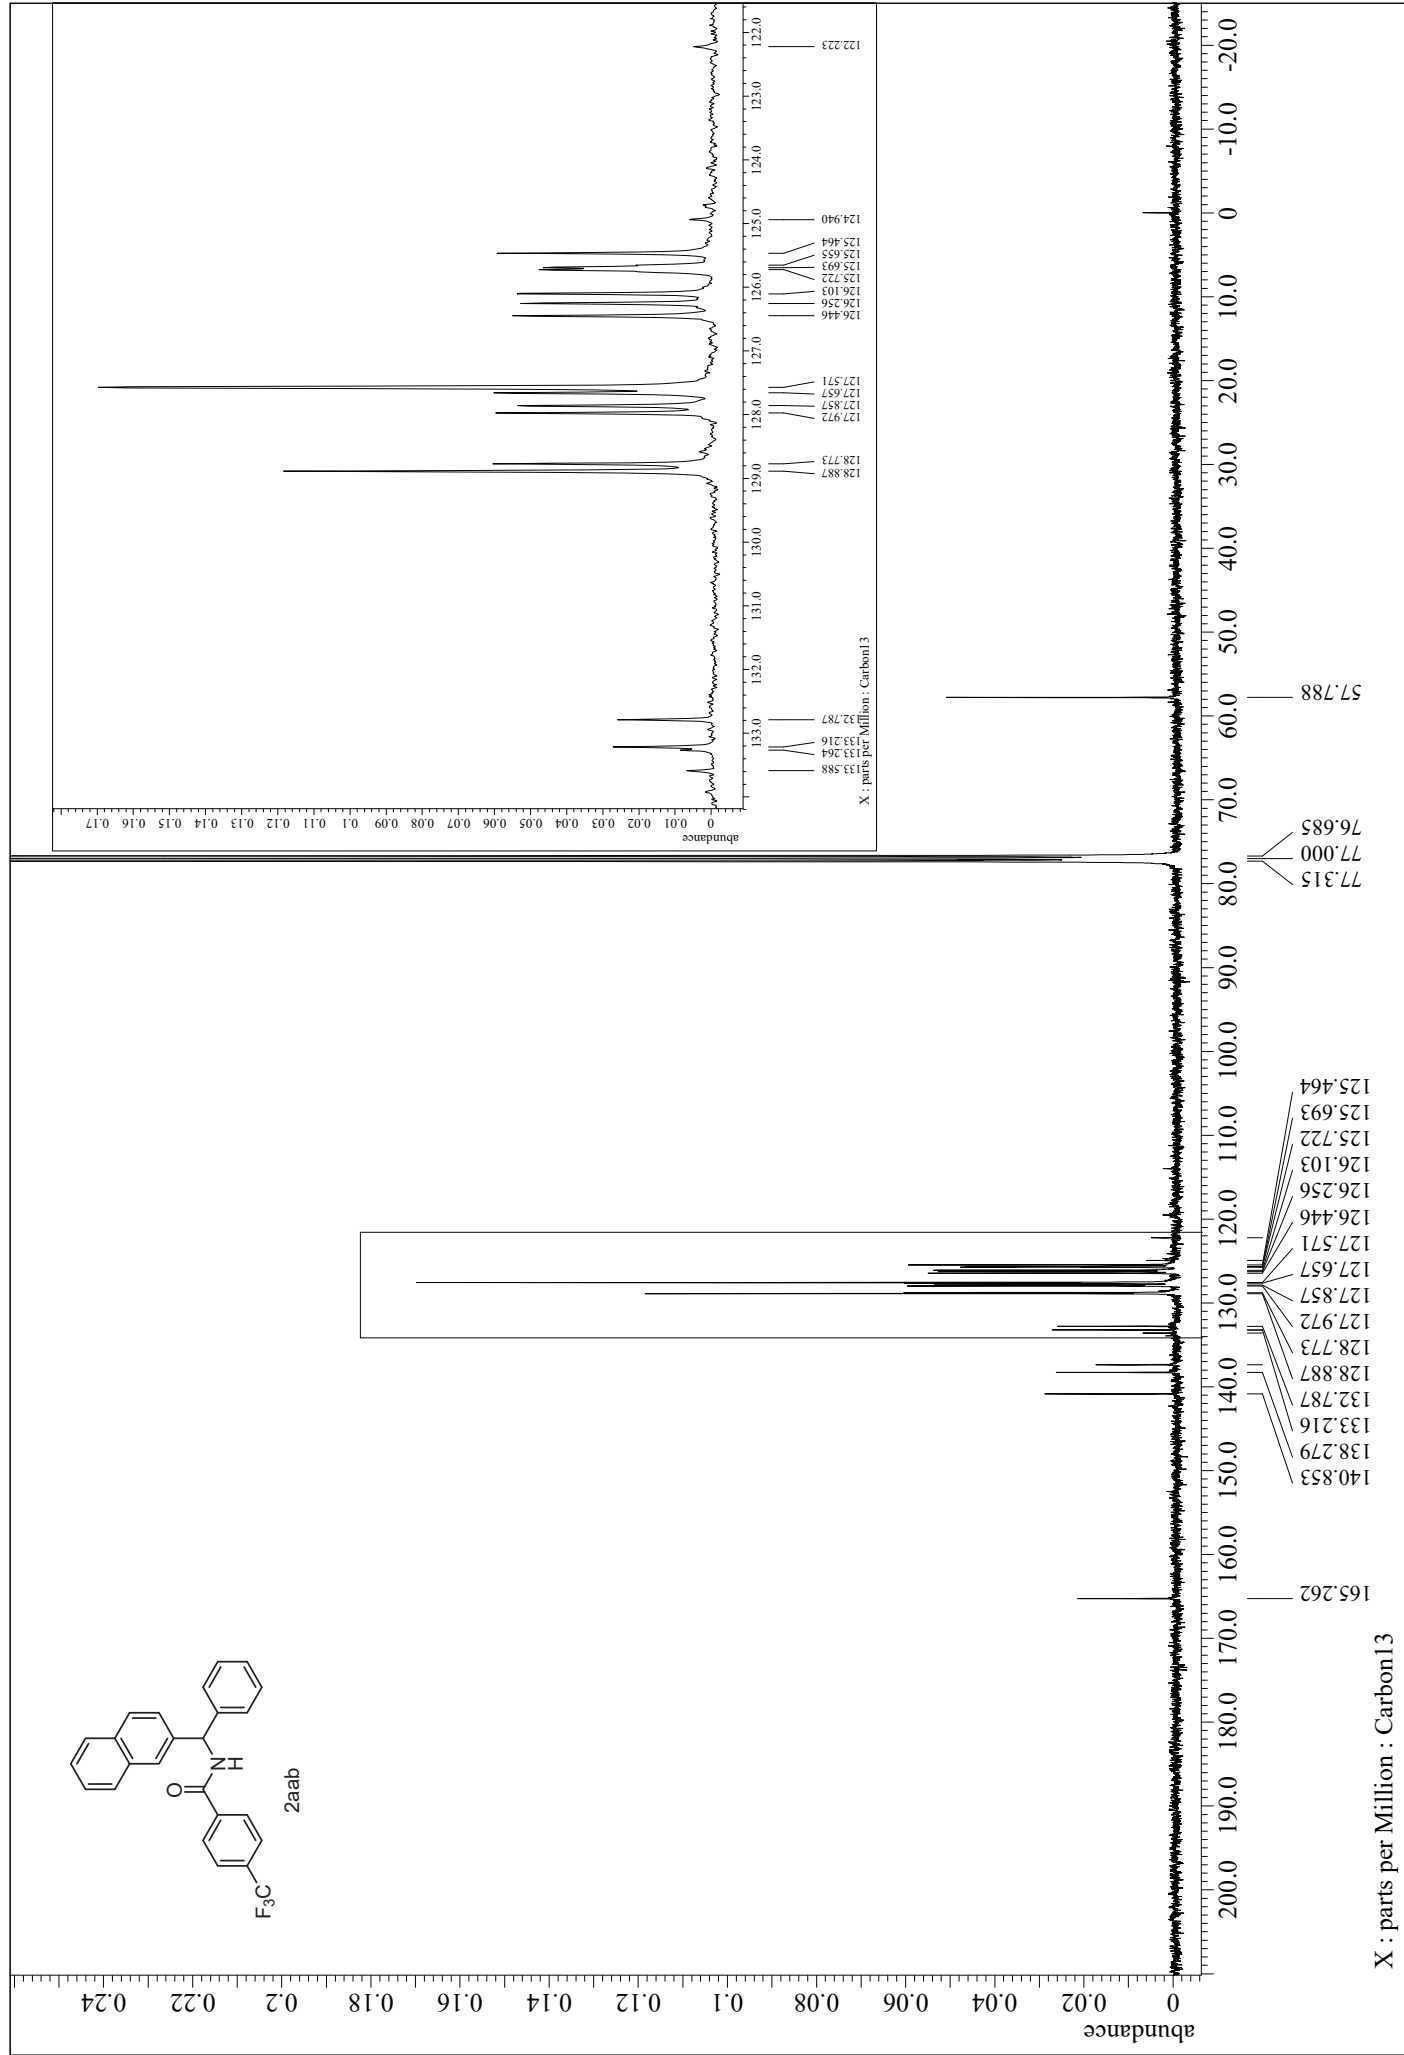

X : parts per Million : Carbon13

$^{19}\text{F}$  NMR (376 MHz,  $\text{CDCl}_3$ )

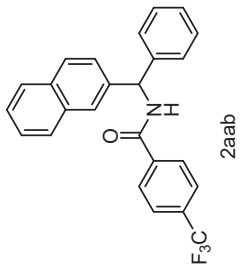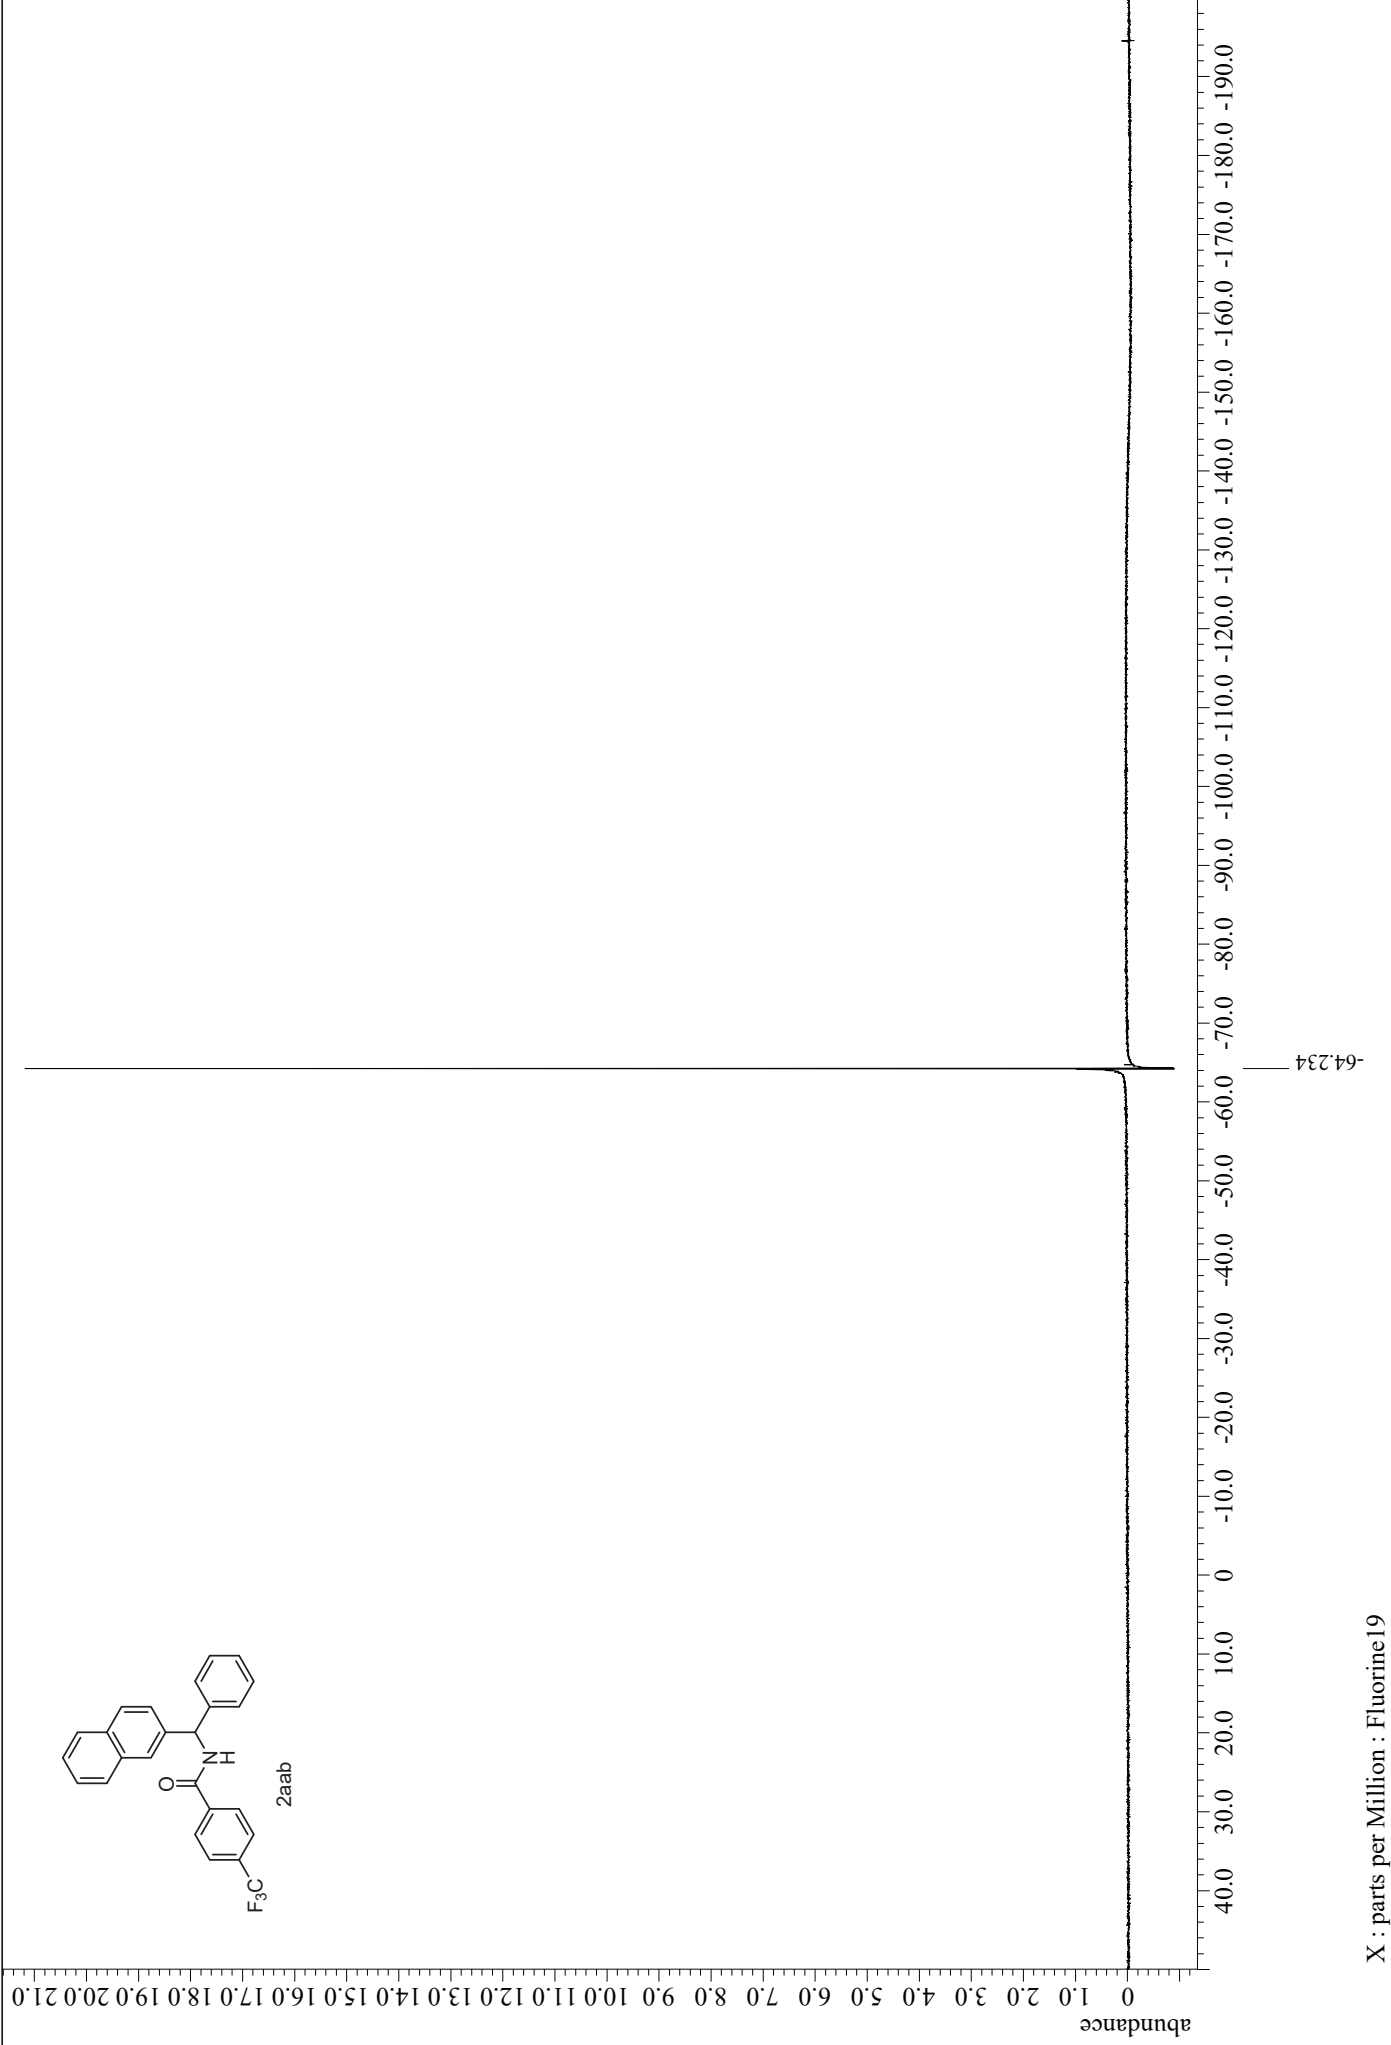

X : parts per Million : Fluorine 19



<sup>1</sup>H NMR (400 MHz, CDCl<sub>3</sub>)

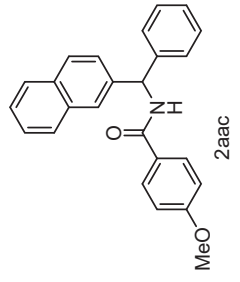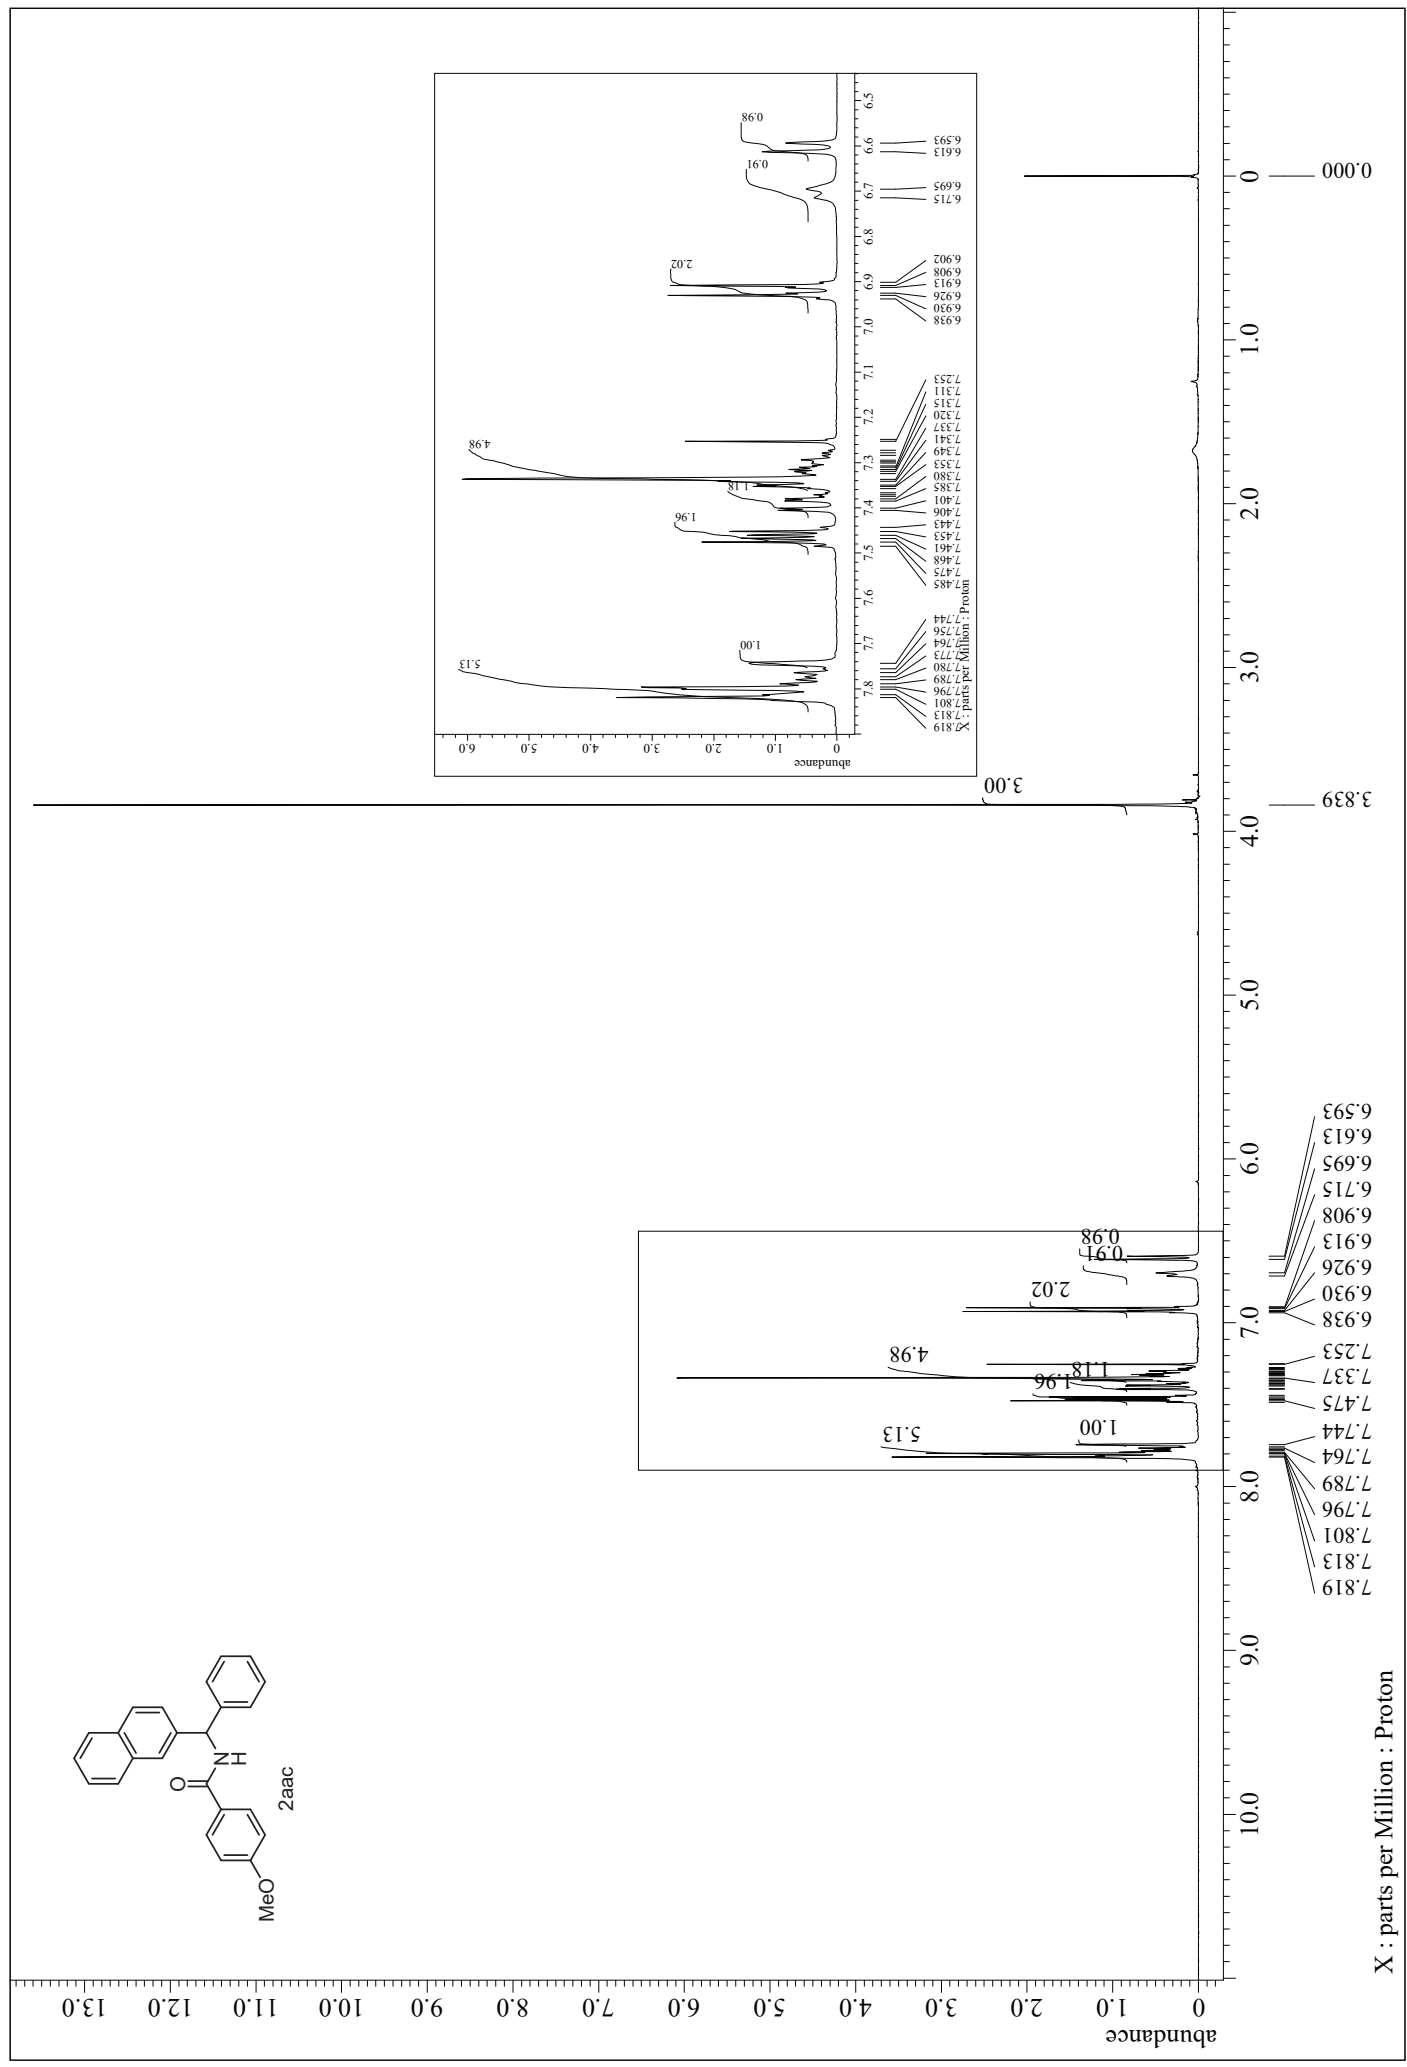

<sup>13</sup>C NMR (101 MHz, CDCl<sub>3</sub>)

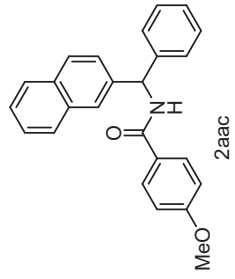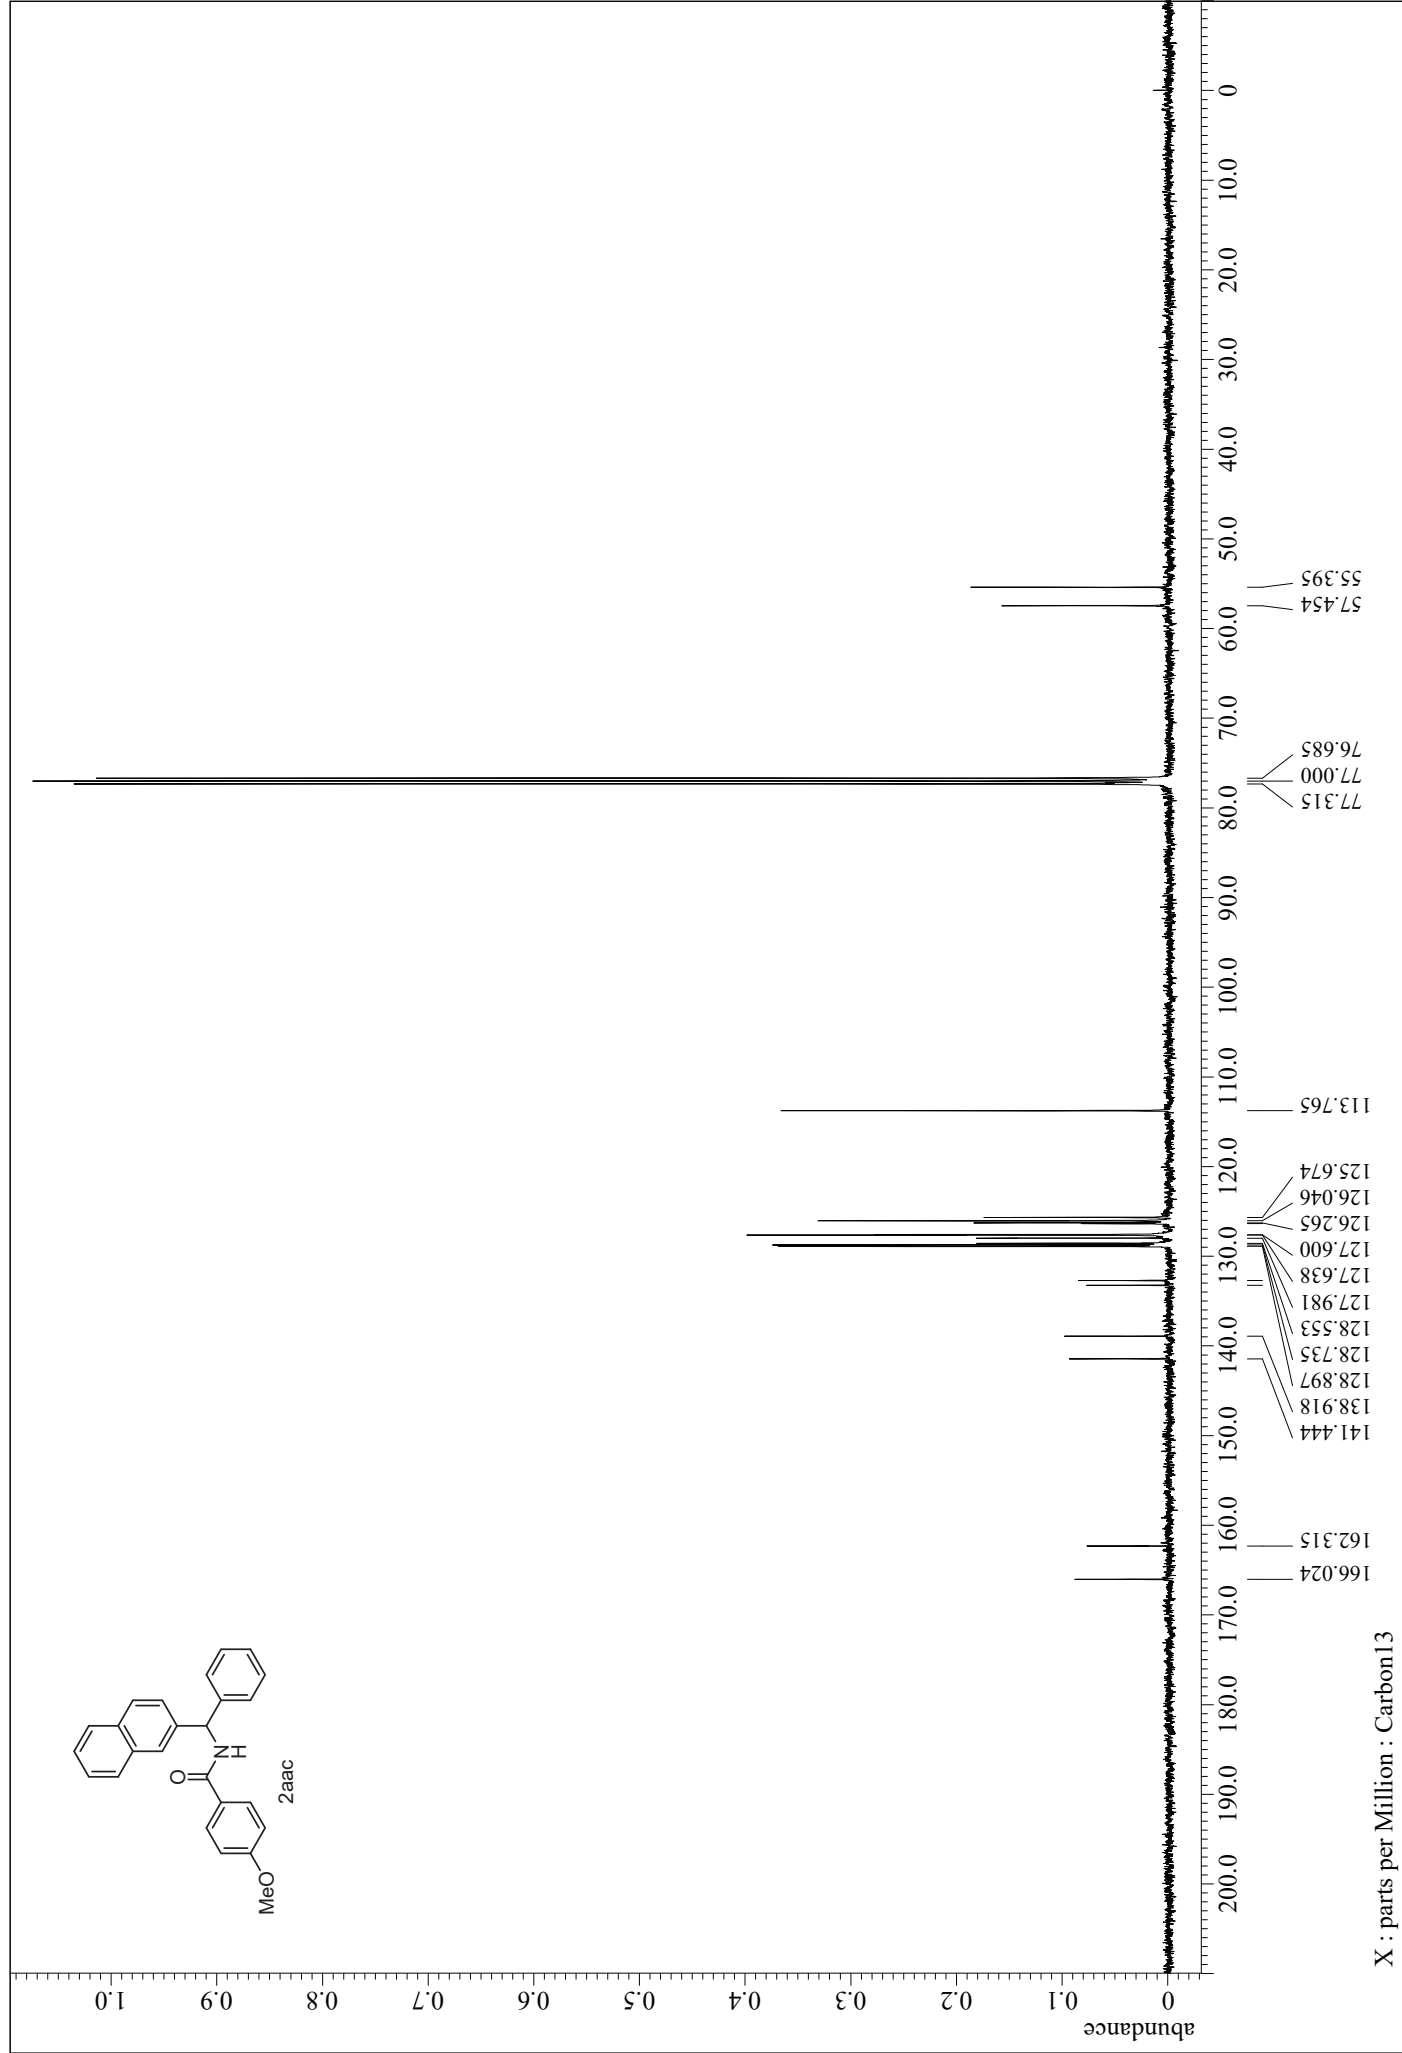

<sup>1</sup>H NMR (400 MHz, CDCl<sub>3</sub>)

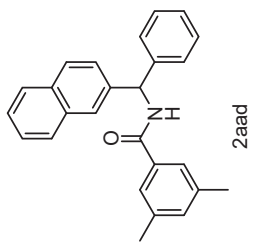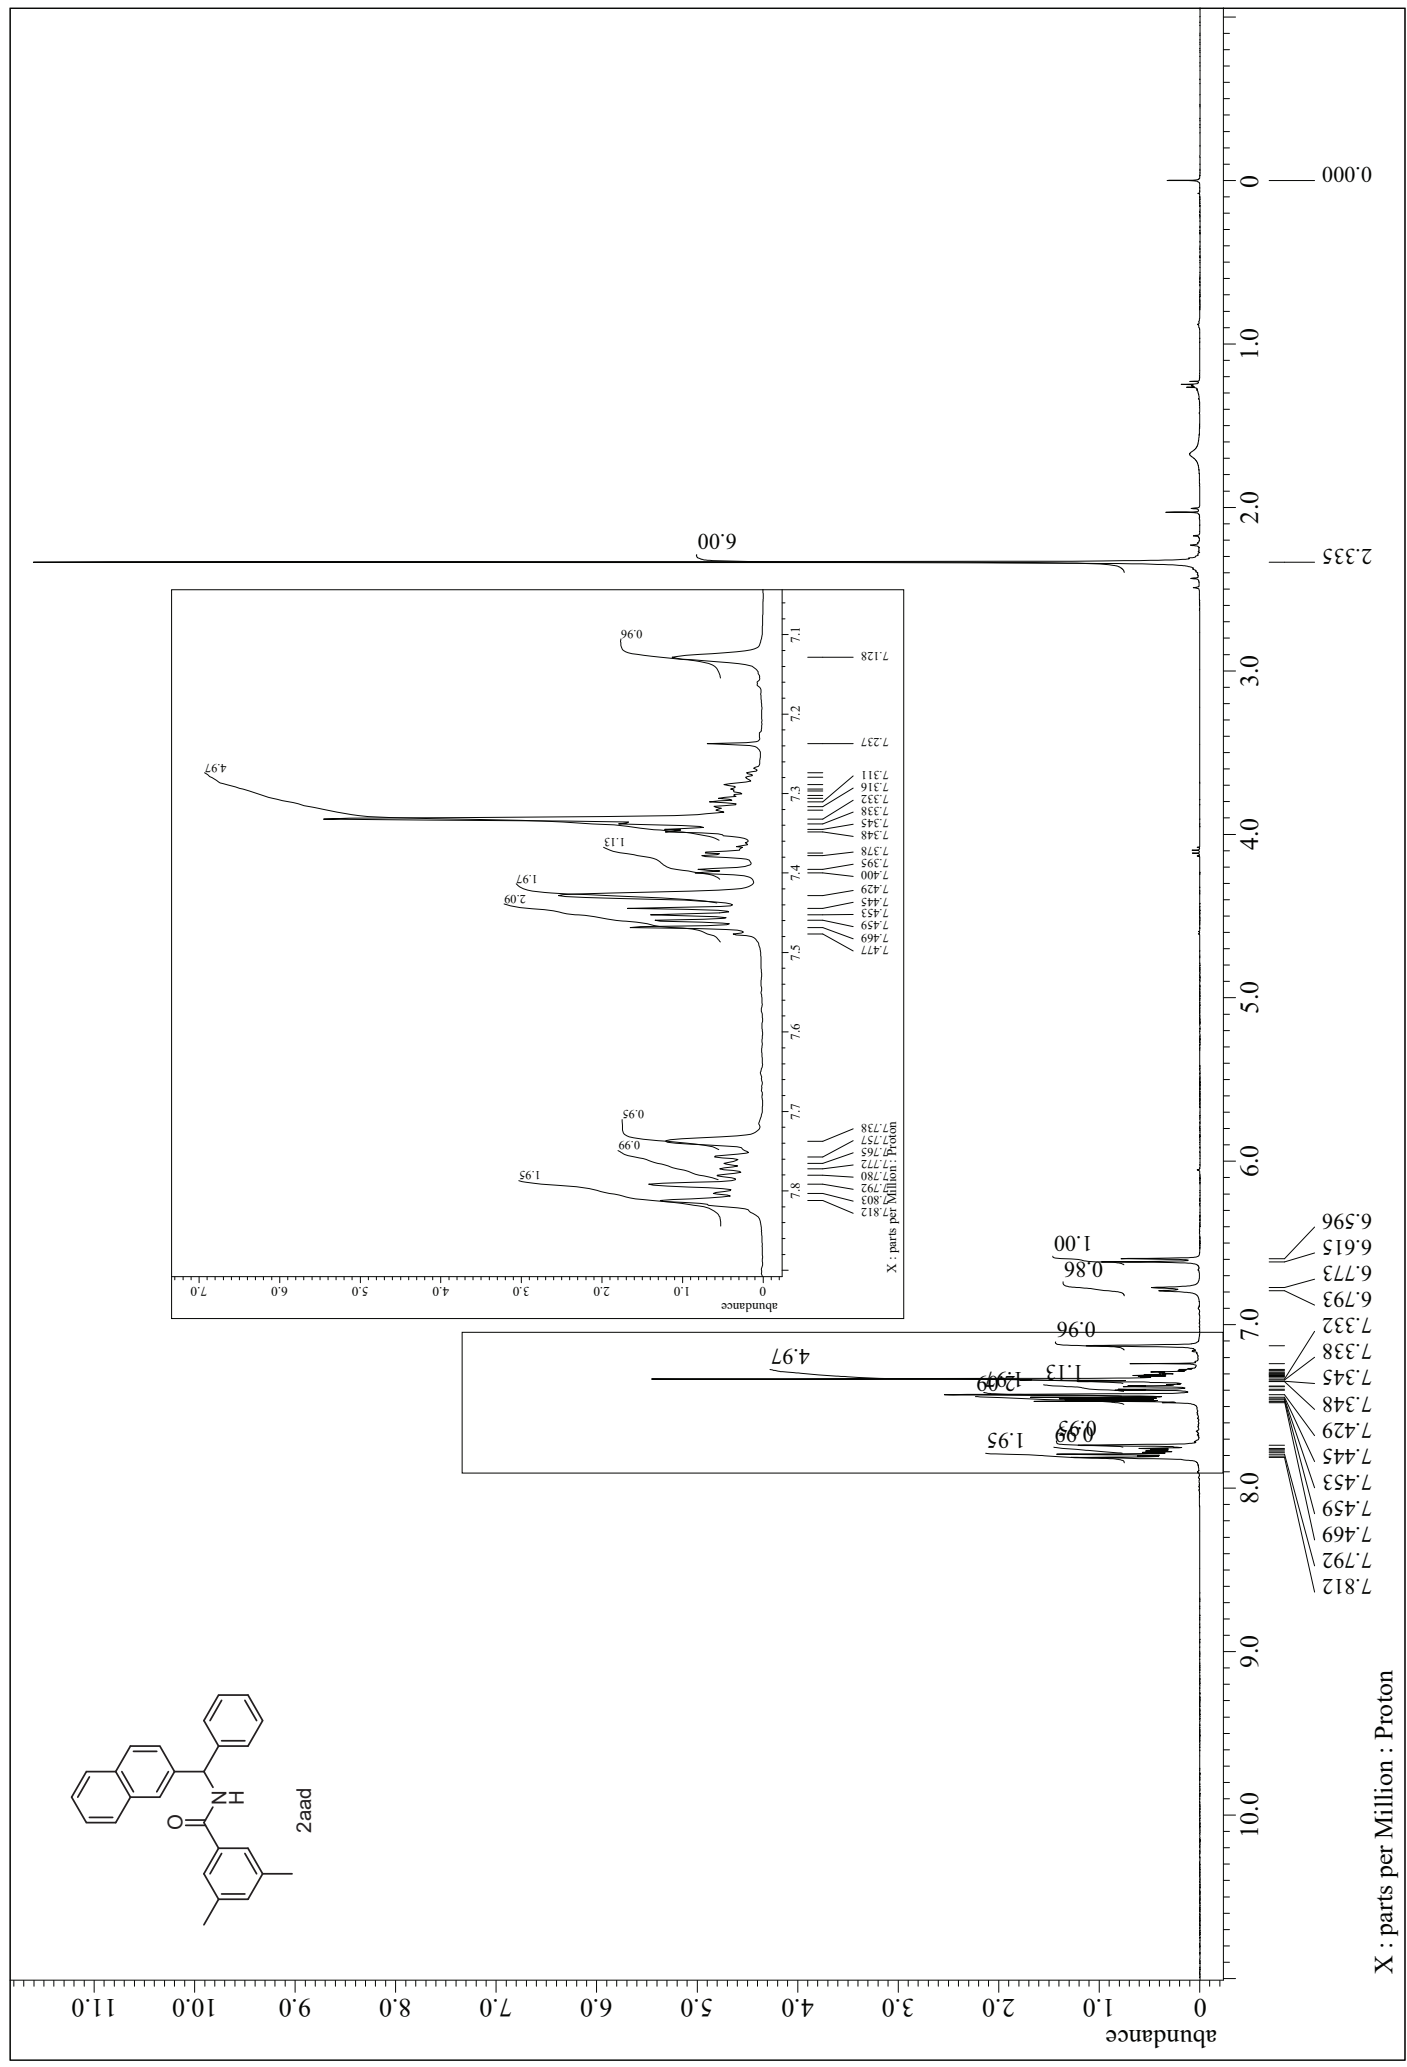

<sup>13</sup>C NMR (101 MHz, CDCl<sub>3</sub>)

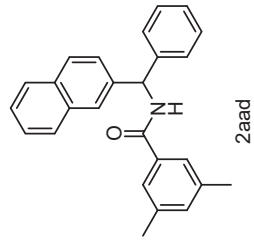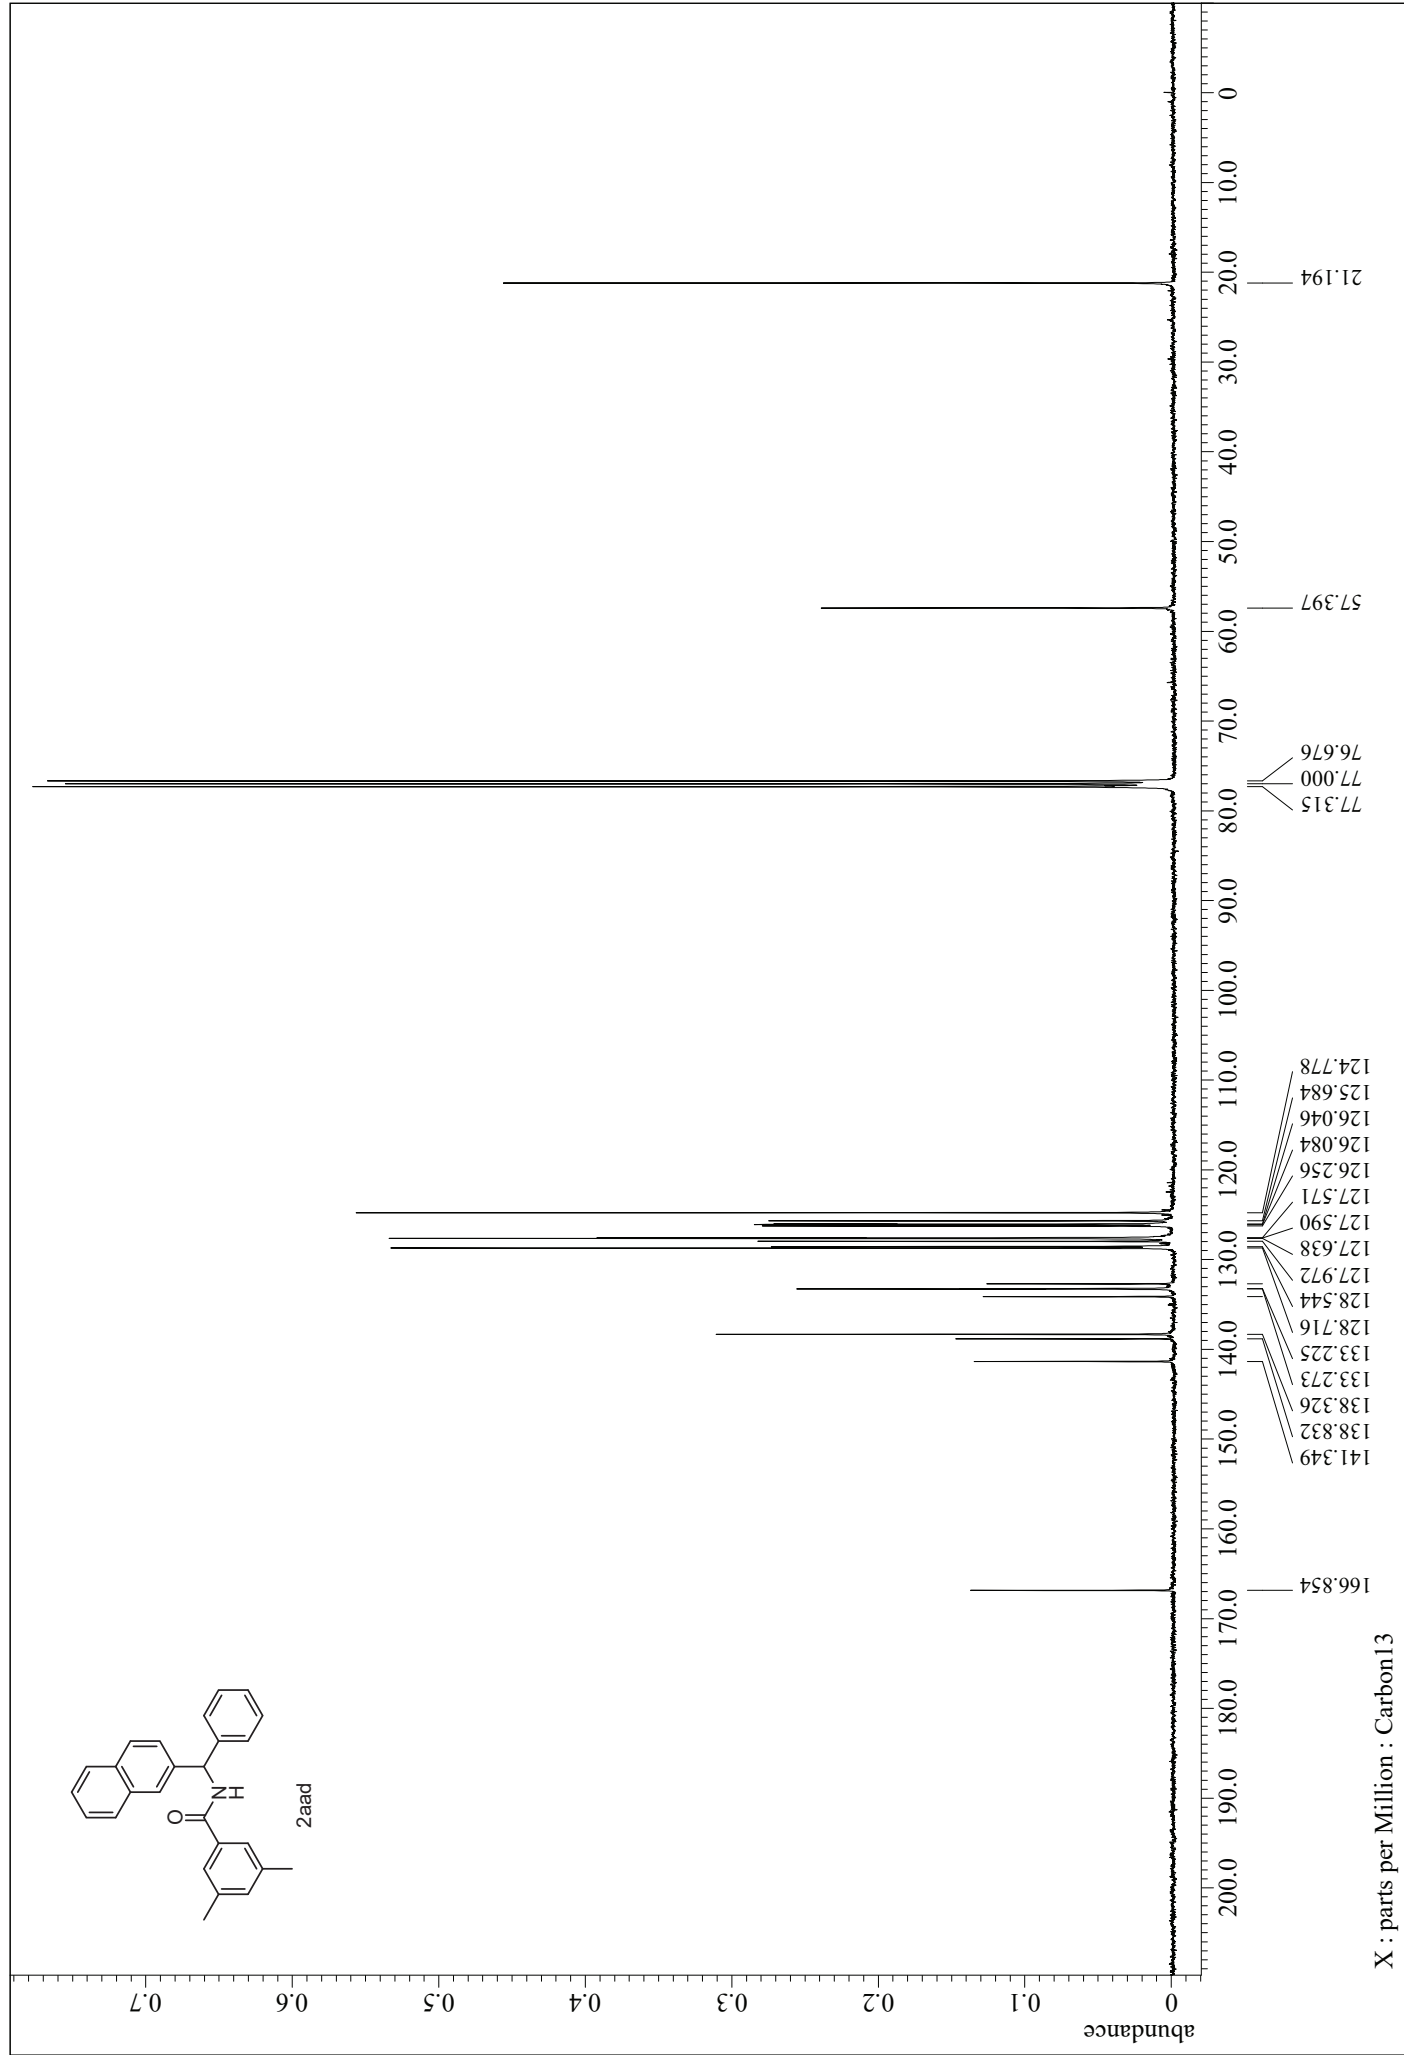

<sup>1</sup>H NMR (400 MHz, CDCl<sub>3</sub>)

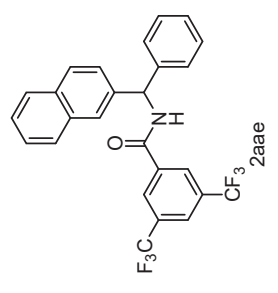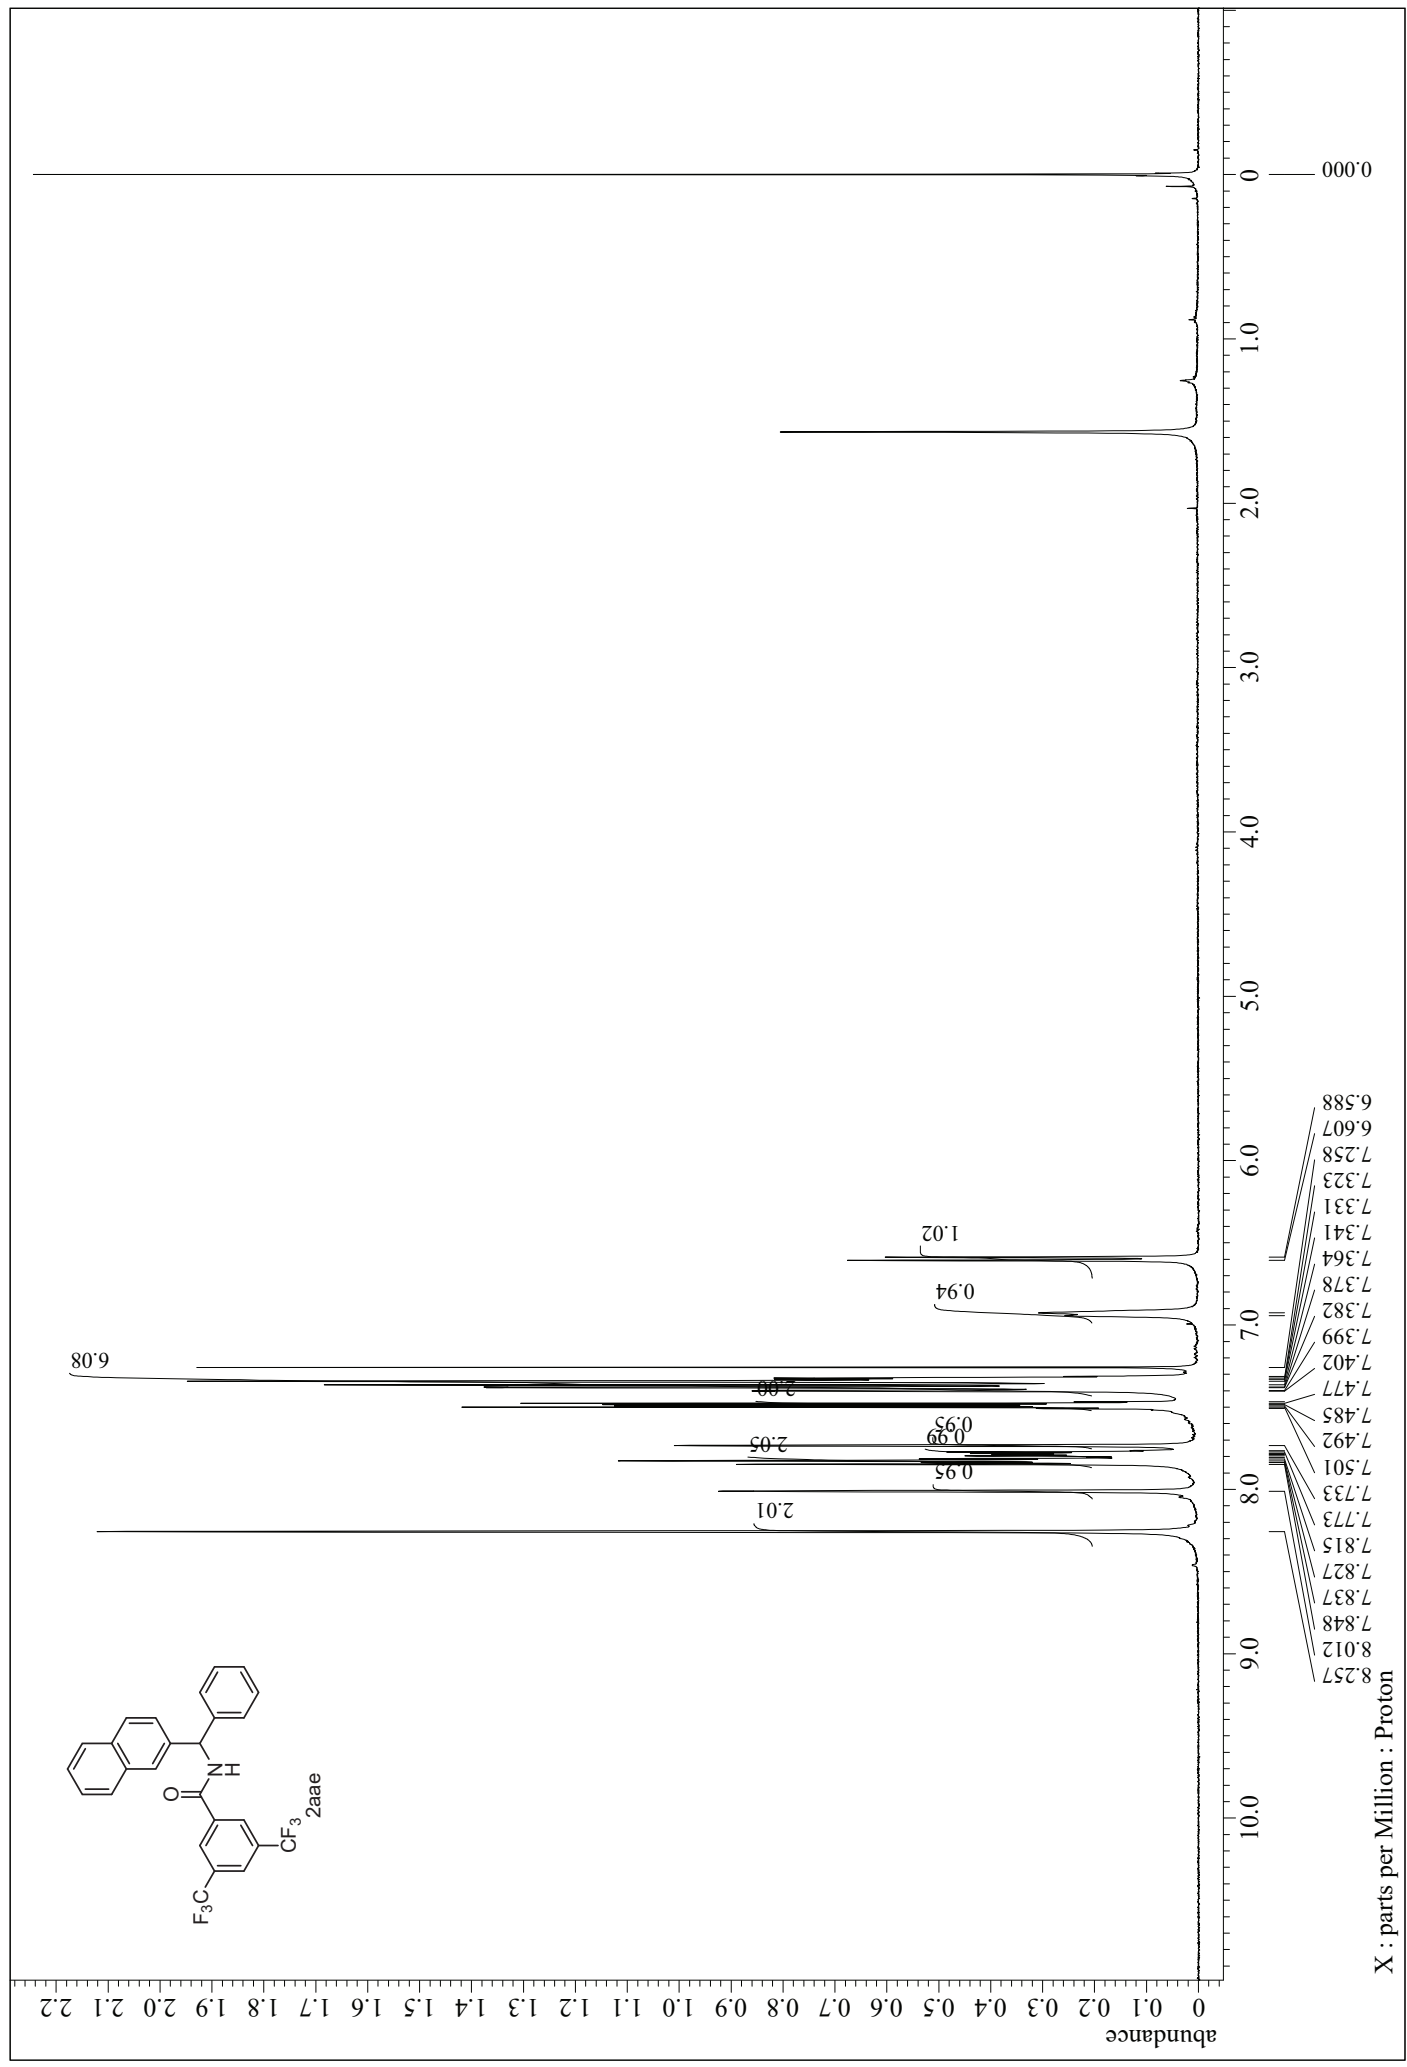

<sup>13</sup>C NMR (101 MHz, CDCl<sub>3</sub>)

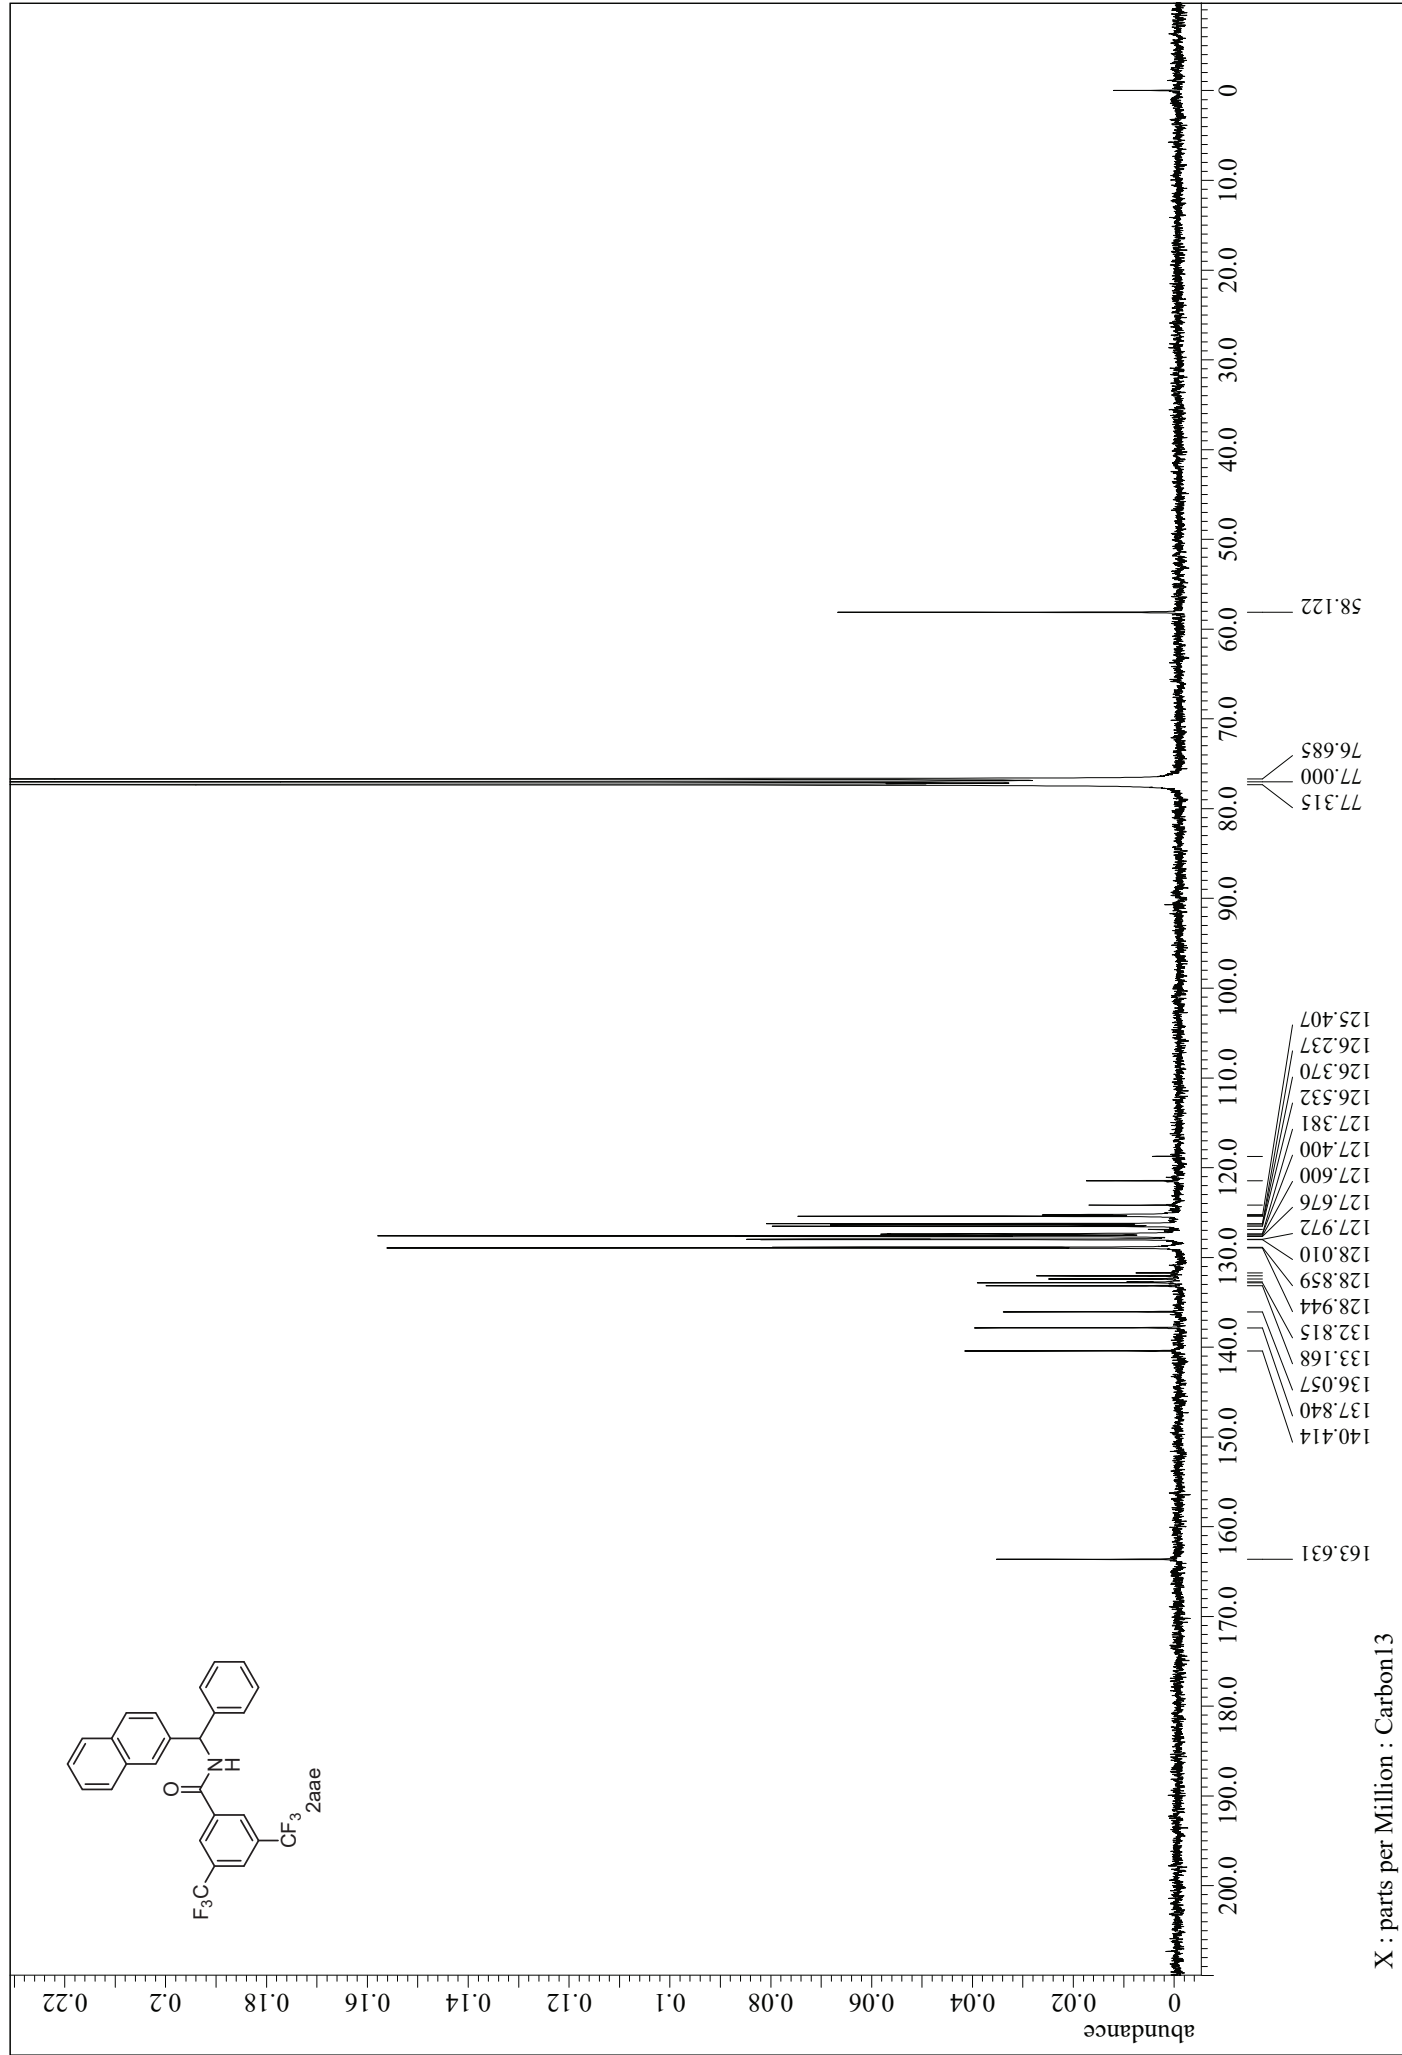

X : parts per Million : Carbon13

$^{19}\text{F}$  NMR (376 MHz,  $\text{CDCl}_3$ )

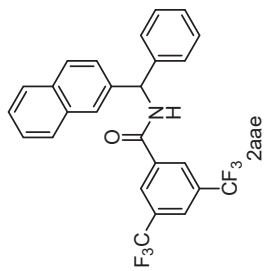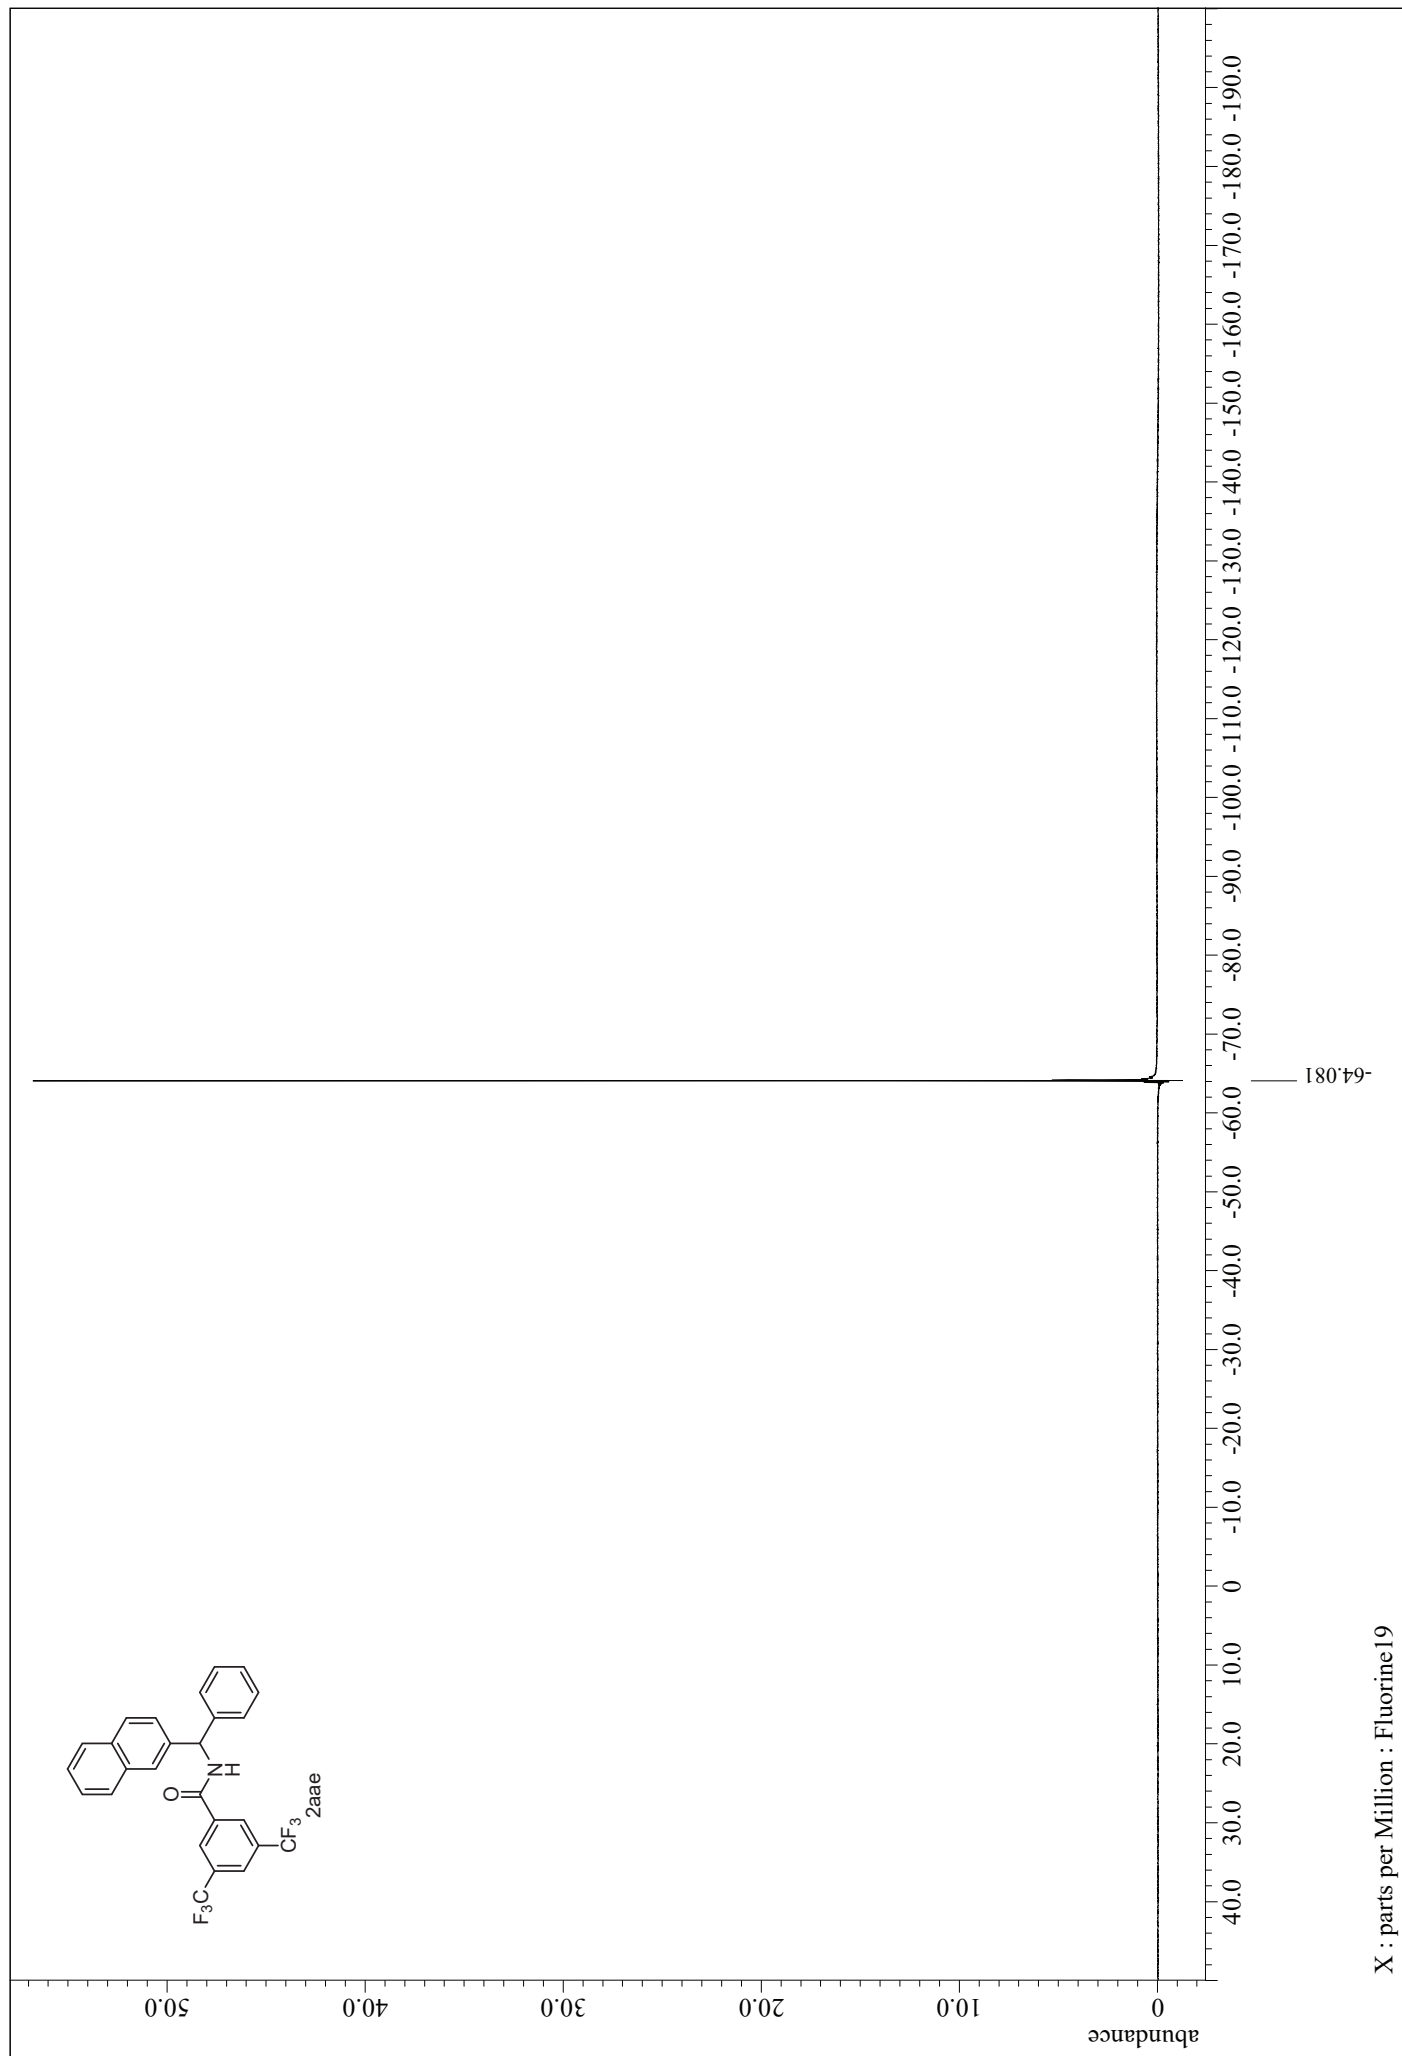

X : parts per Million : Fluorine 19

<sup>1</sup>H NMR (400 MHz, CDCl<sub>3</sub>)

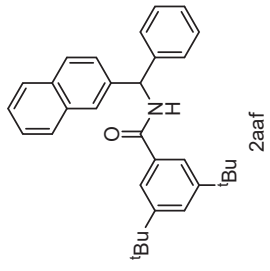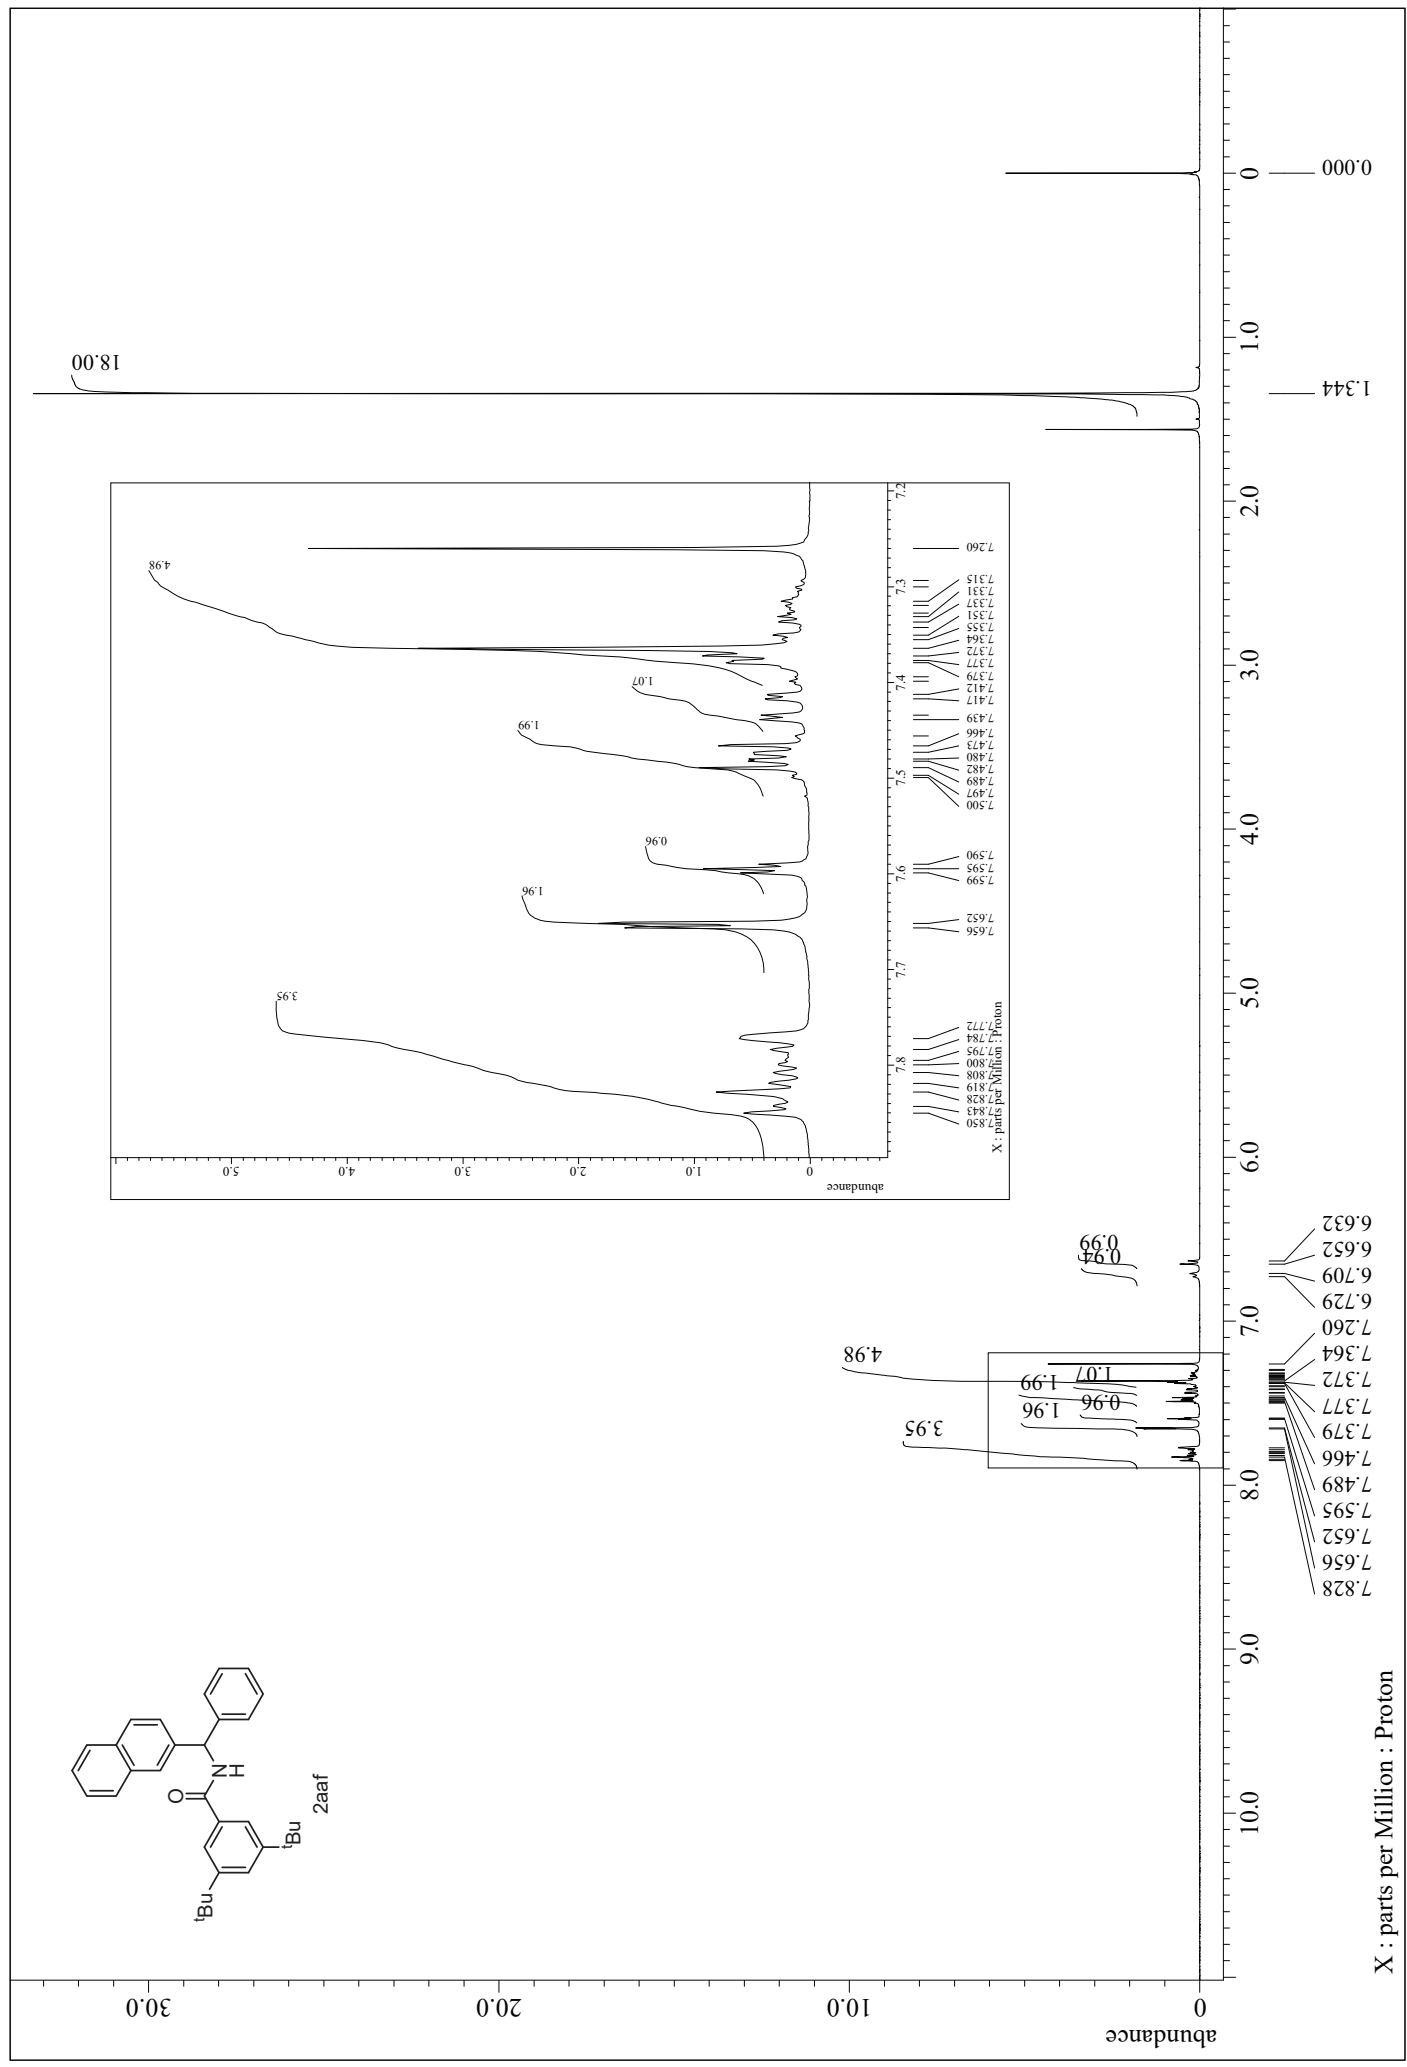



$^{13}\text{C}$  NMR (101 MHz,  $\text{CDCl}_3$ )

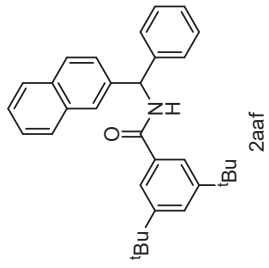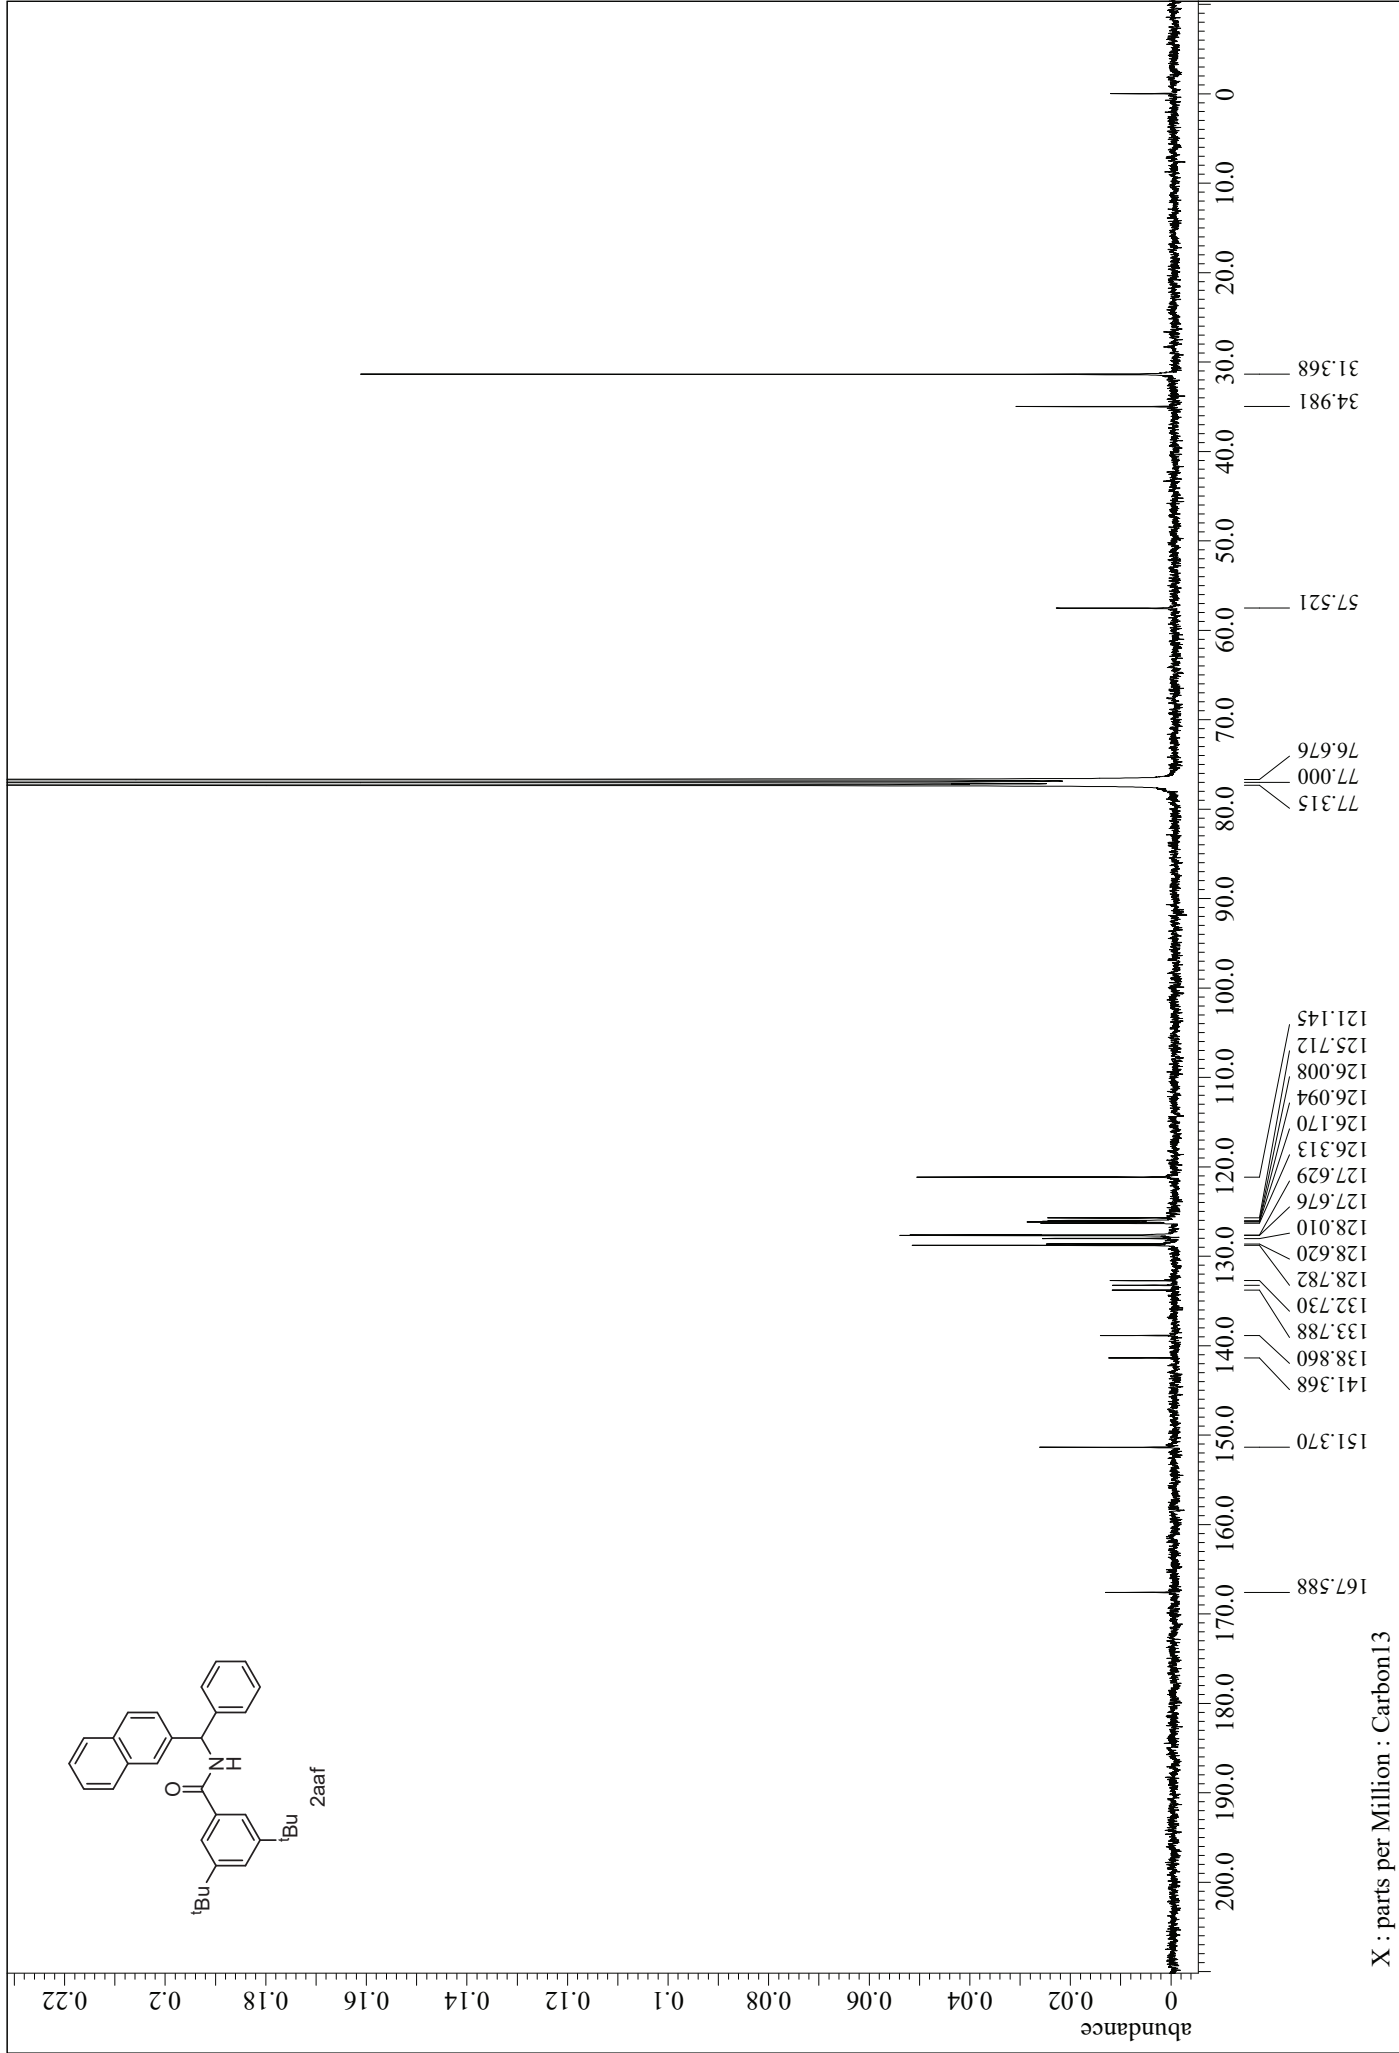

X : parts per Million : Carbon13

<sup>1</sup>H NMR (400 MHz, CDCl<sub>3</sub>)

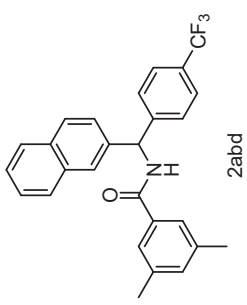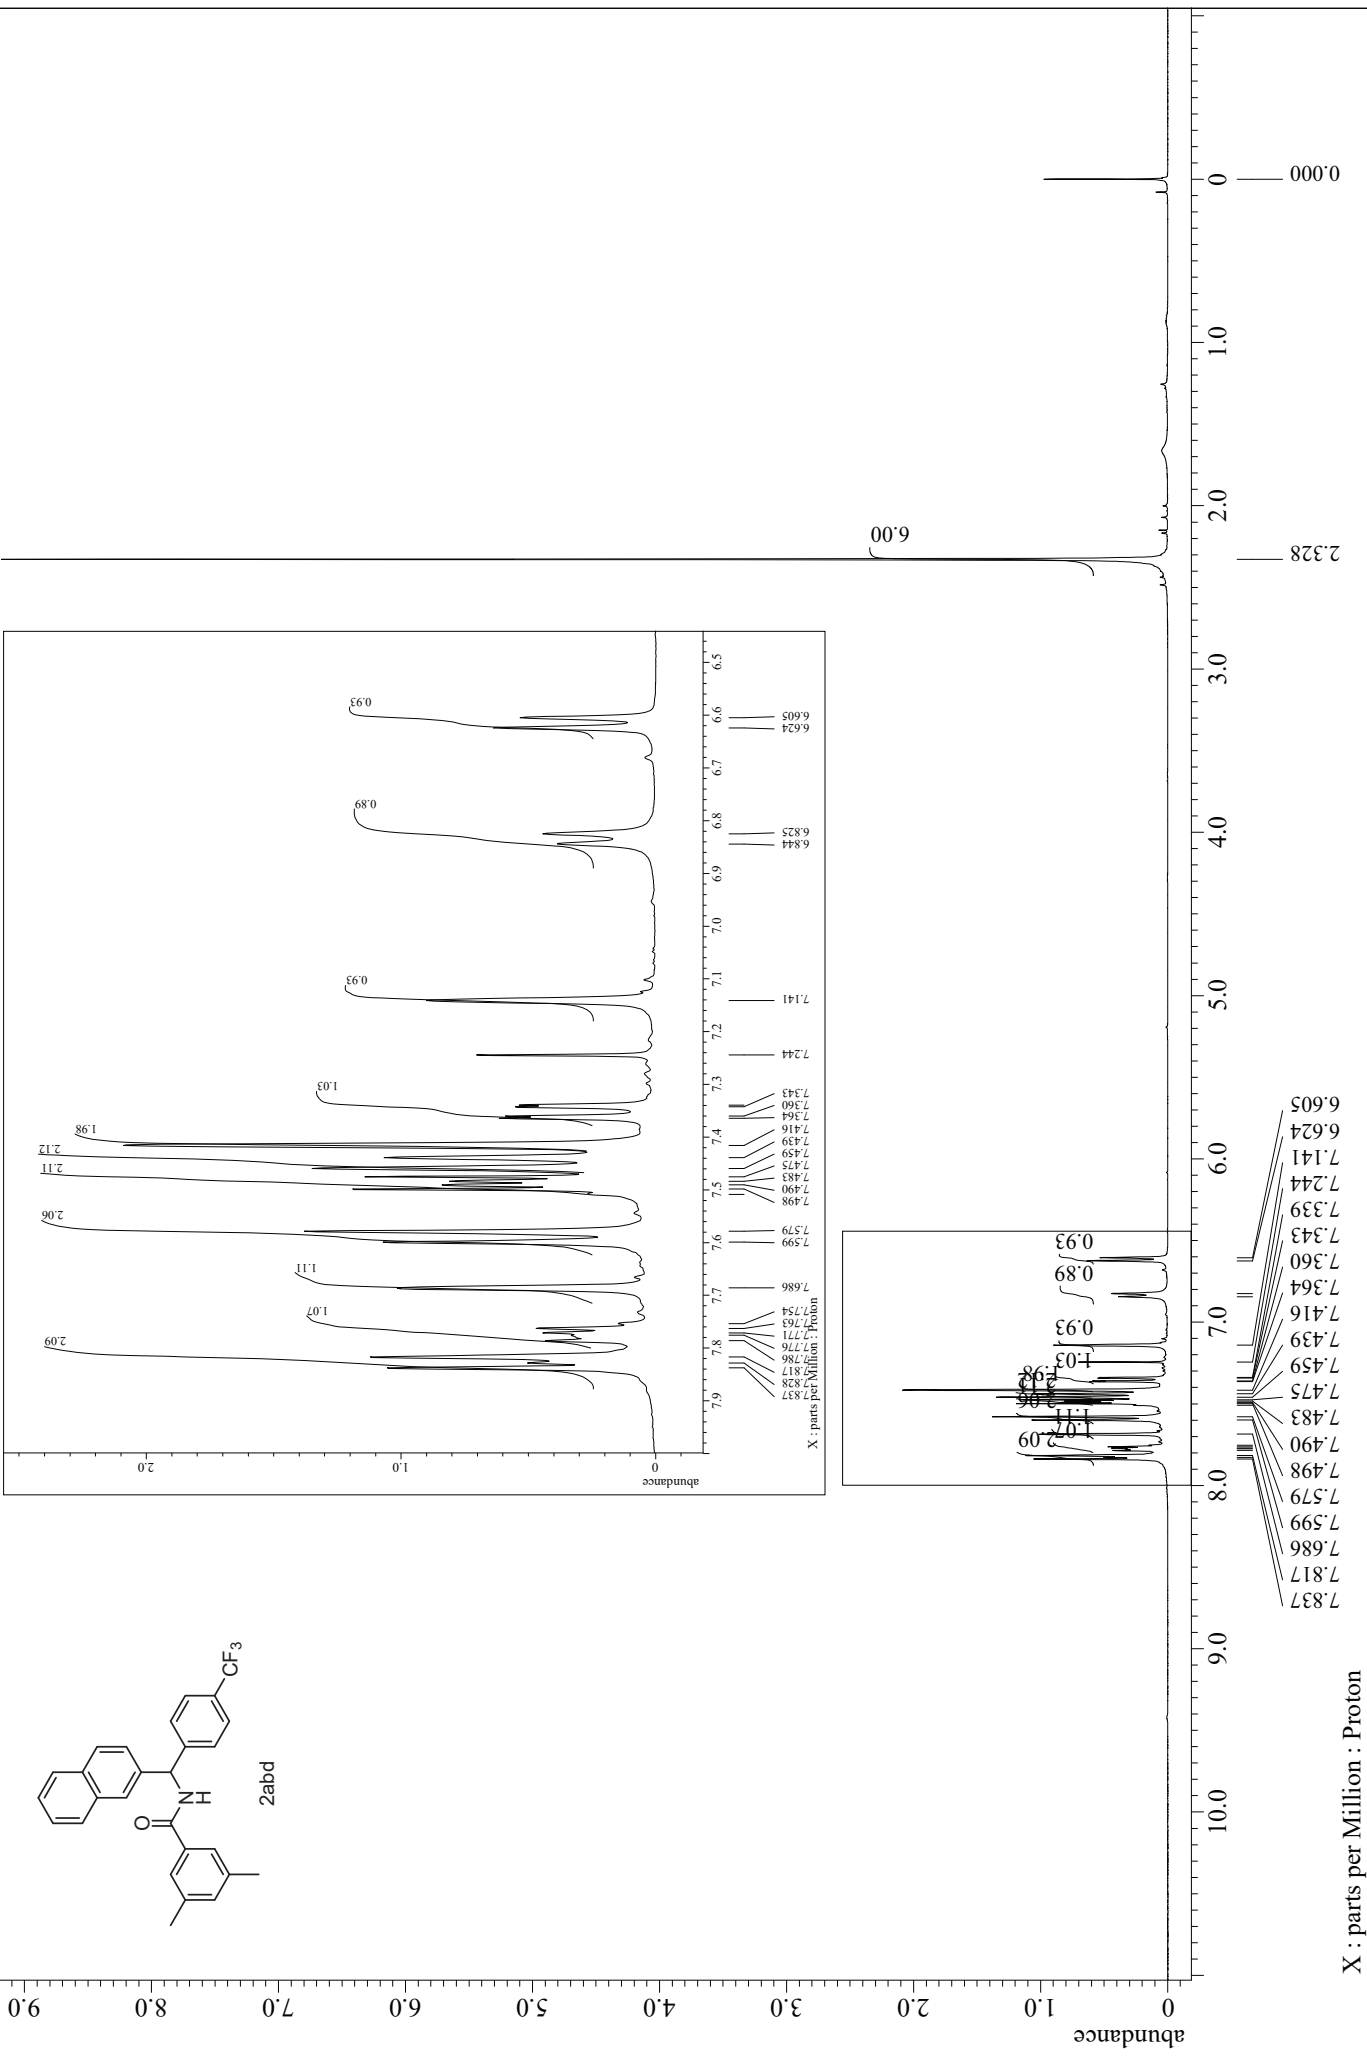

X : parts per Million : Proton

<sup>13</sup>C NMR (101 MHz, CDCl<sub>3</sub>)

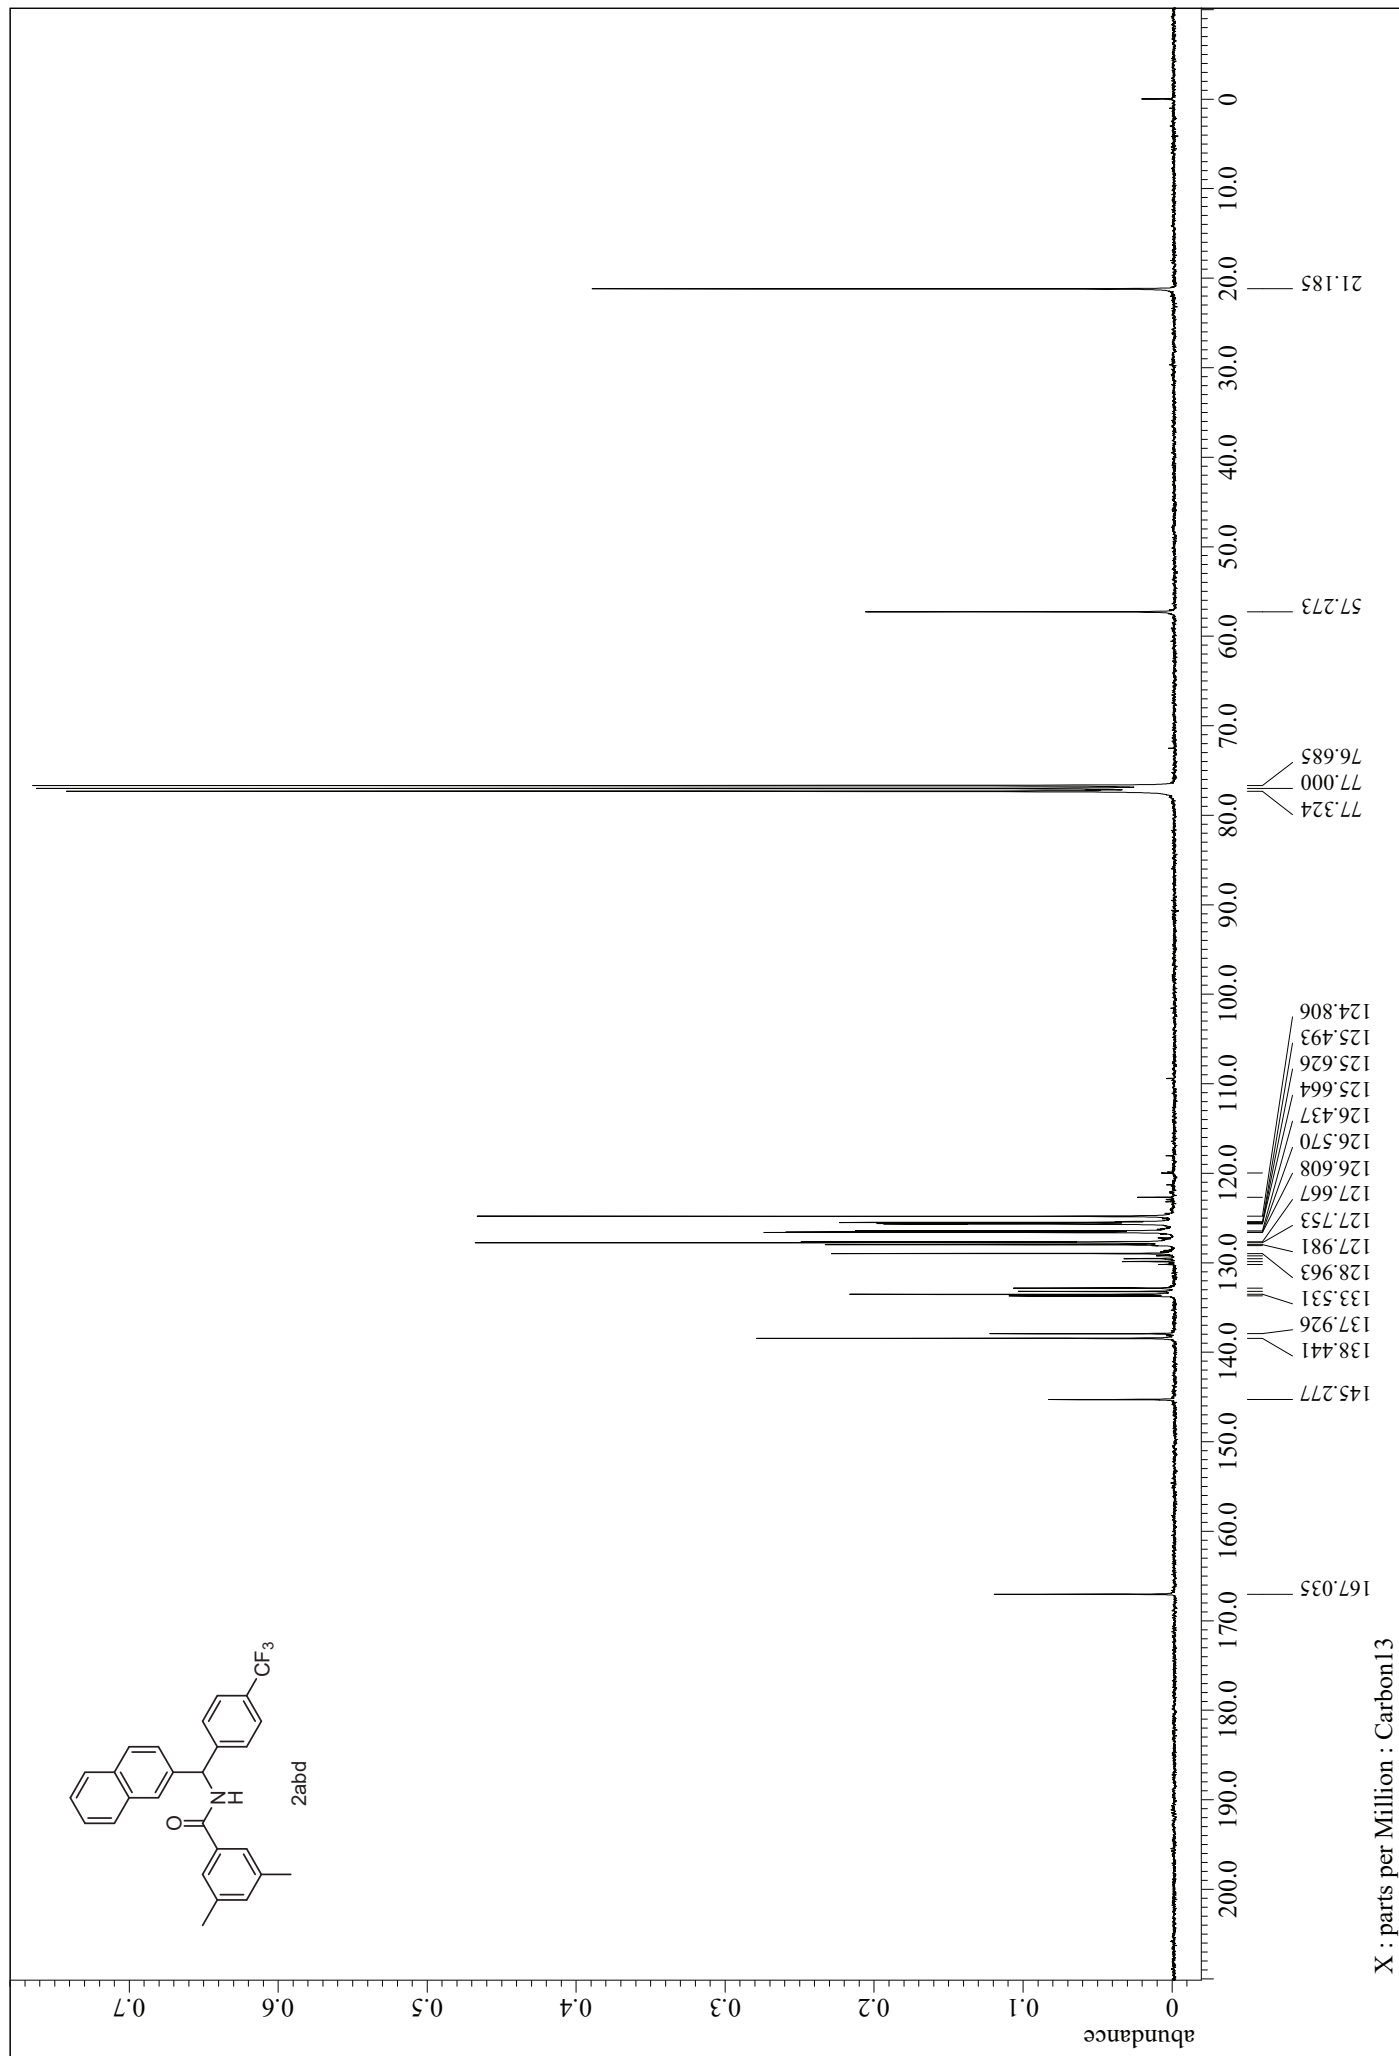

X : parts per Million : Carbon13

<sup>19</sup>F NMR (376 MHz, CDCl<sub>3</sub>)

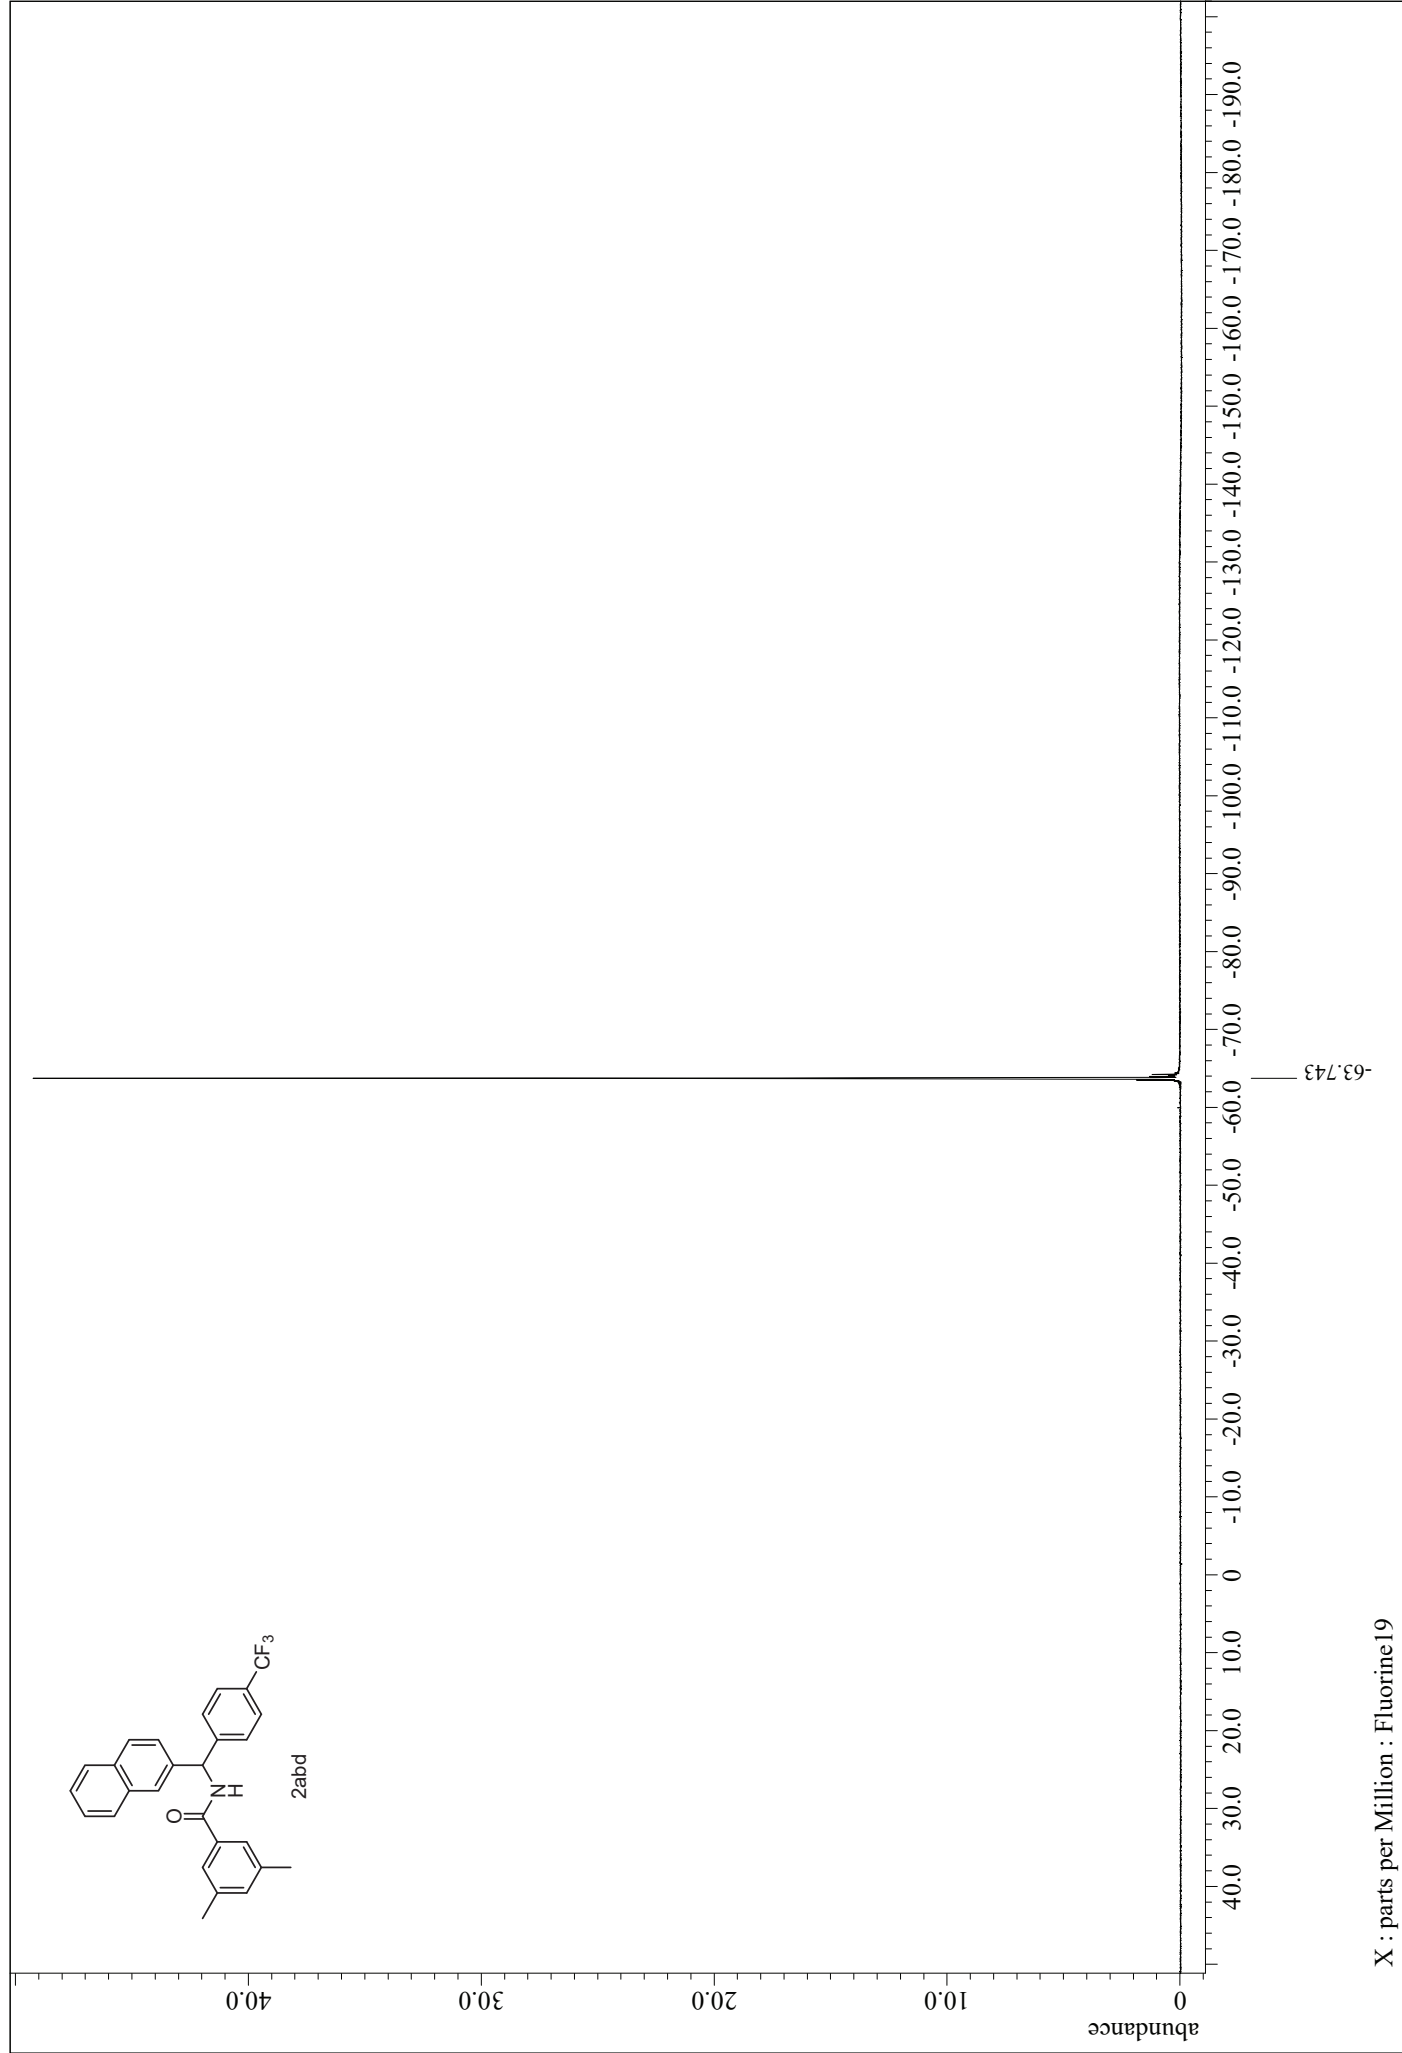

X : parts per Million : Fluorine 19

<sup>1</sup>H NMR (400 MHz, CDCl<sub>3</sub>)

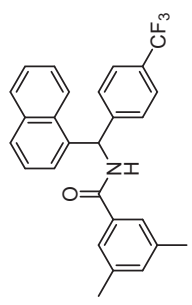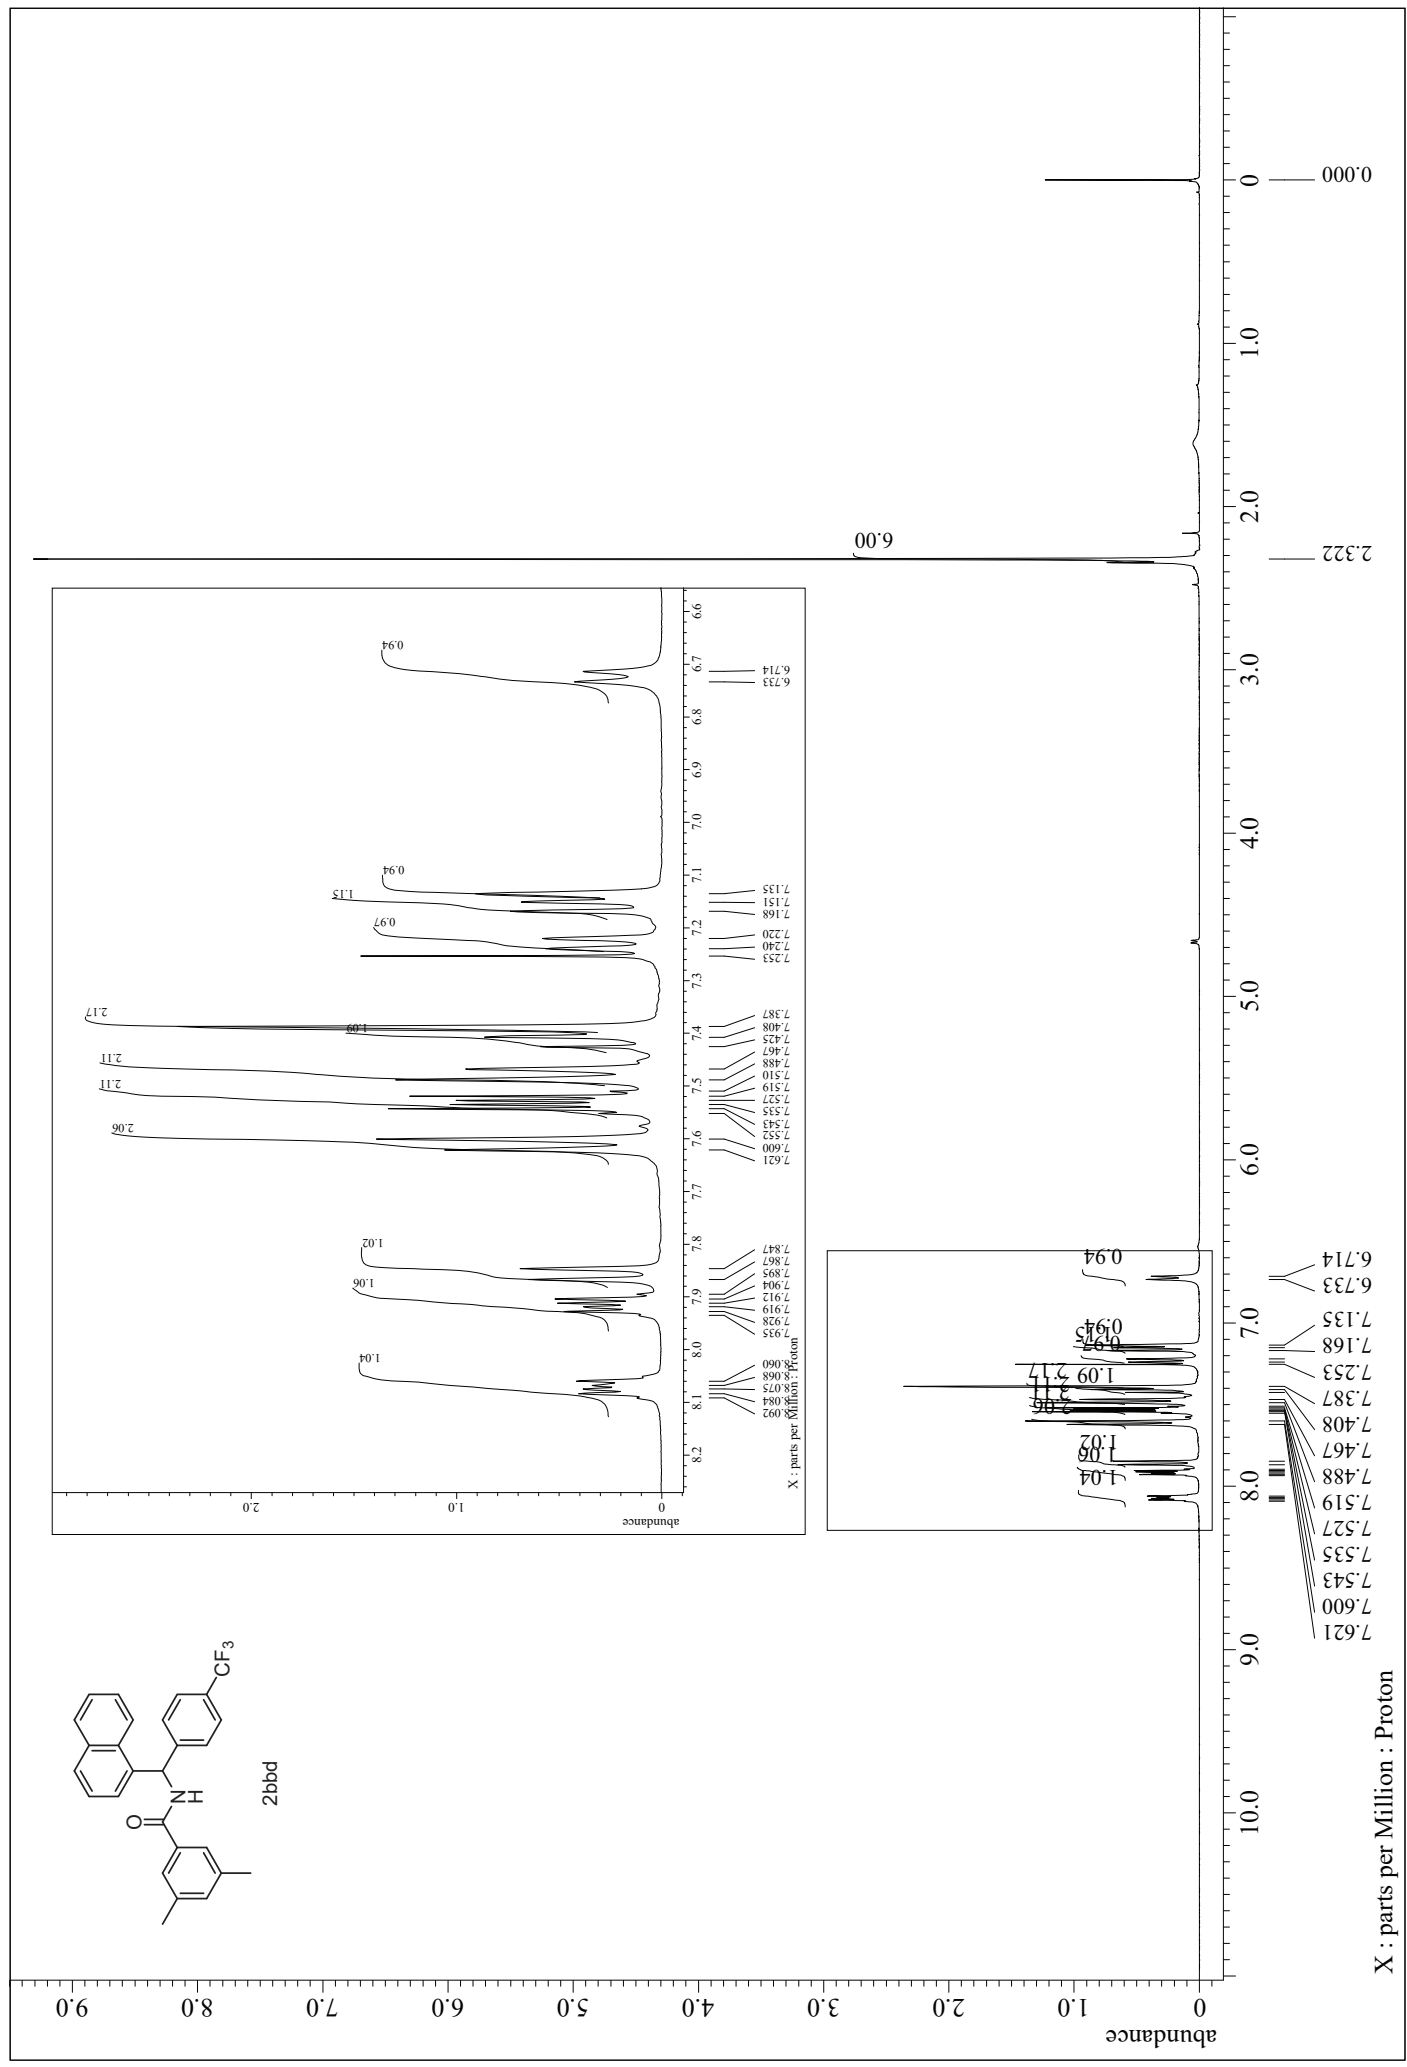

<sup>13</sup>C NMR (101 MHz, CDCl<sub>3</sub>)

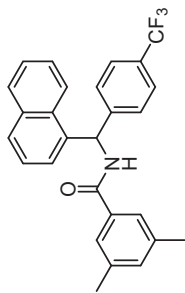

2bbd

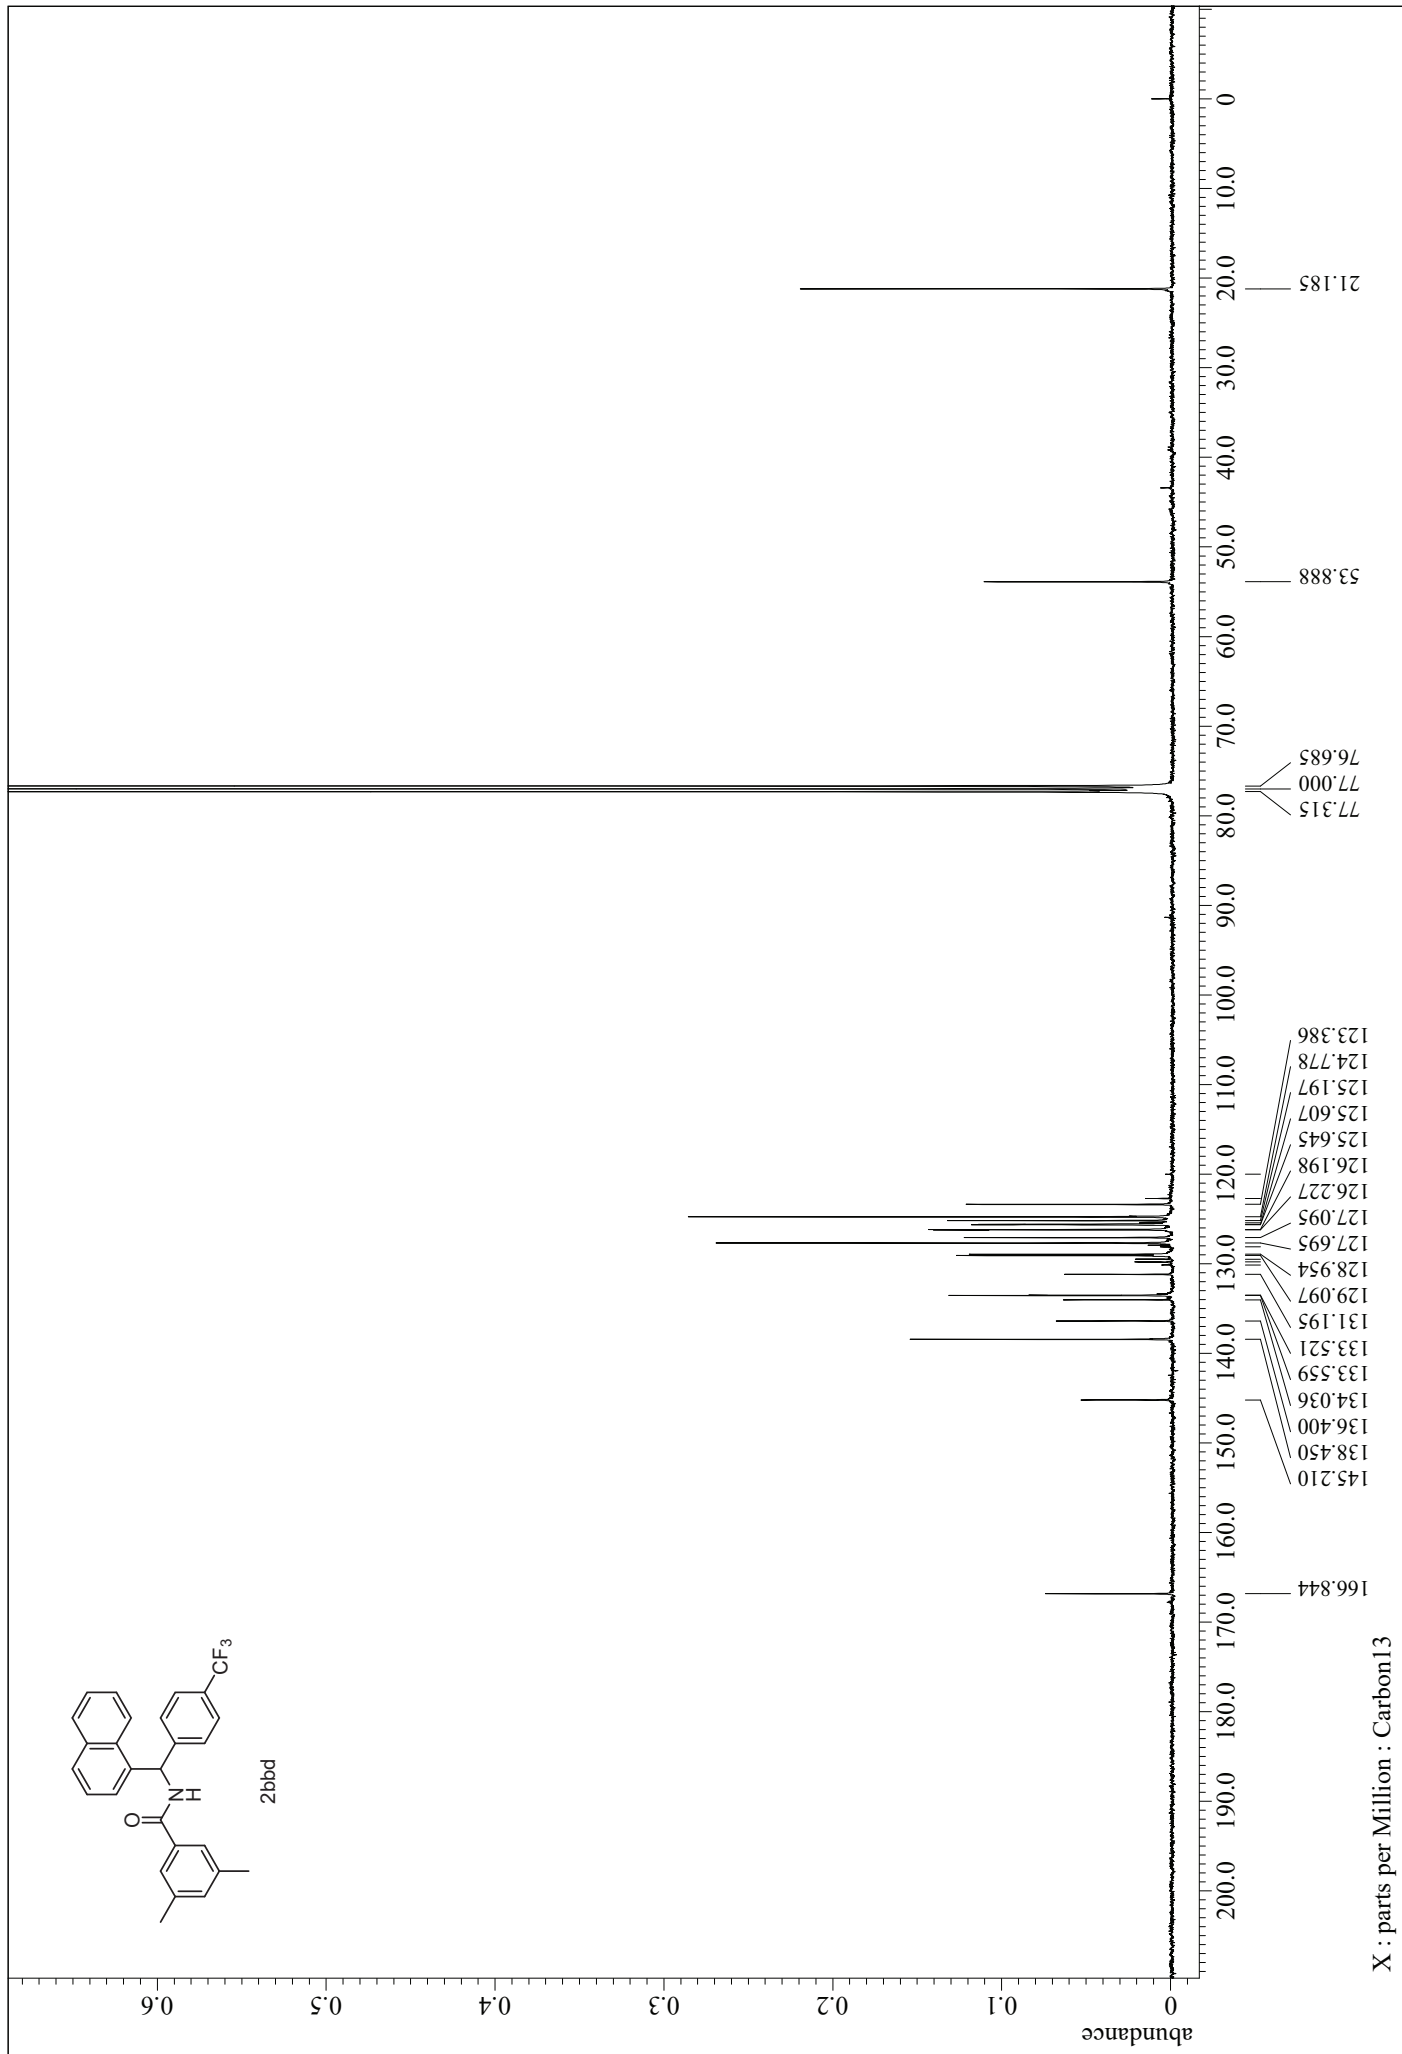

<sup>19</sup>F NMR (376 MHz, CDCl<sub>3</sub>)

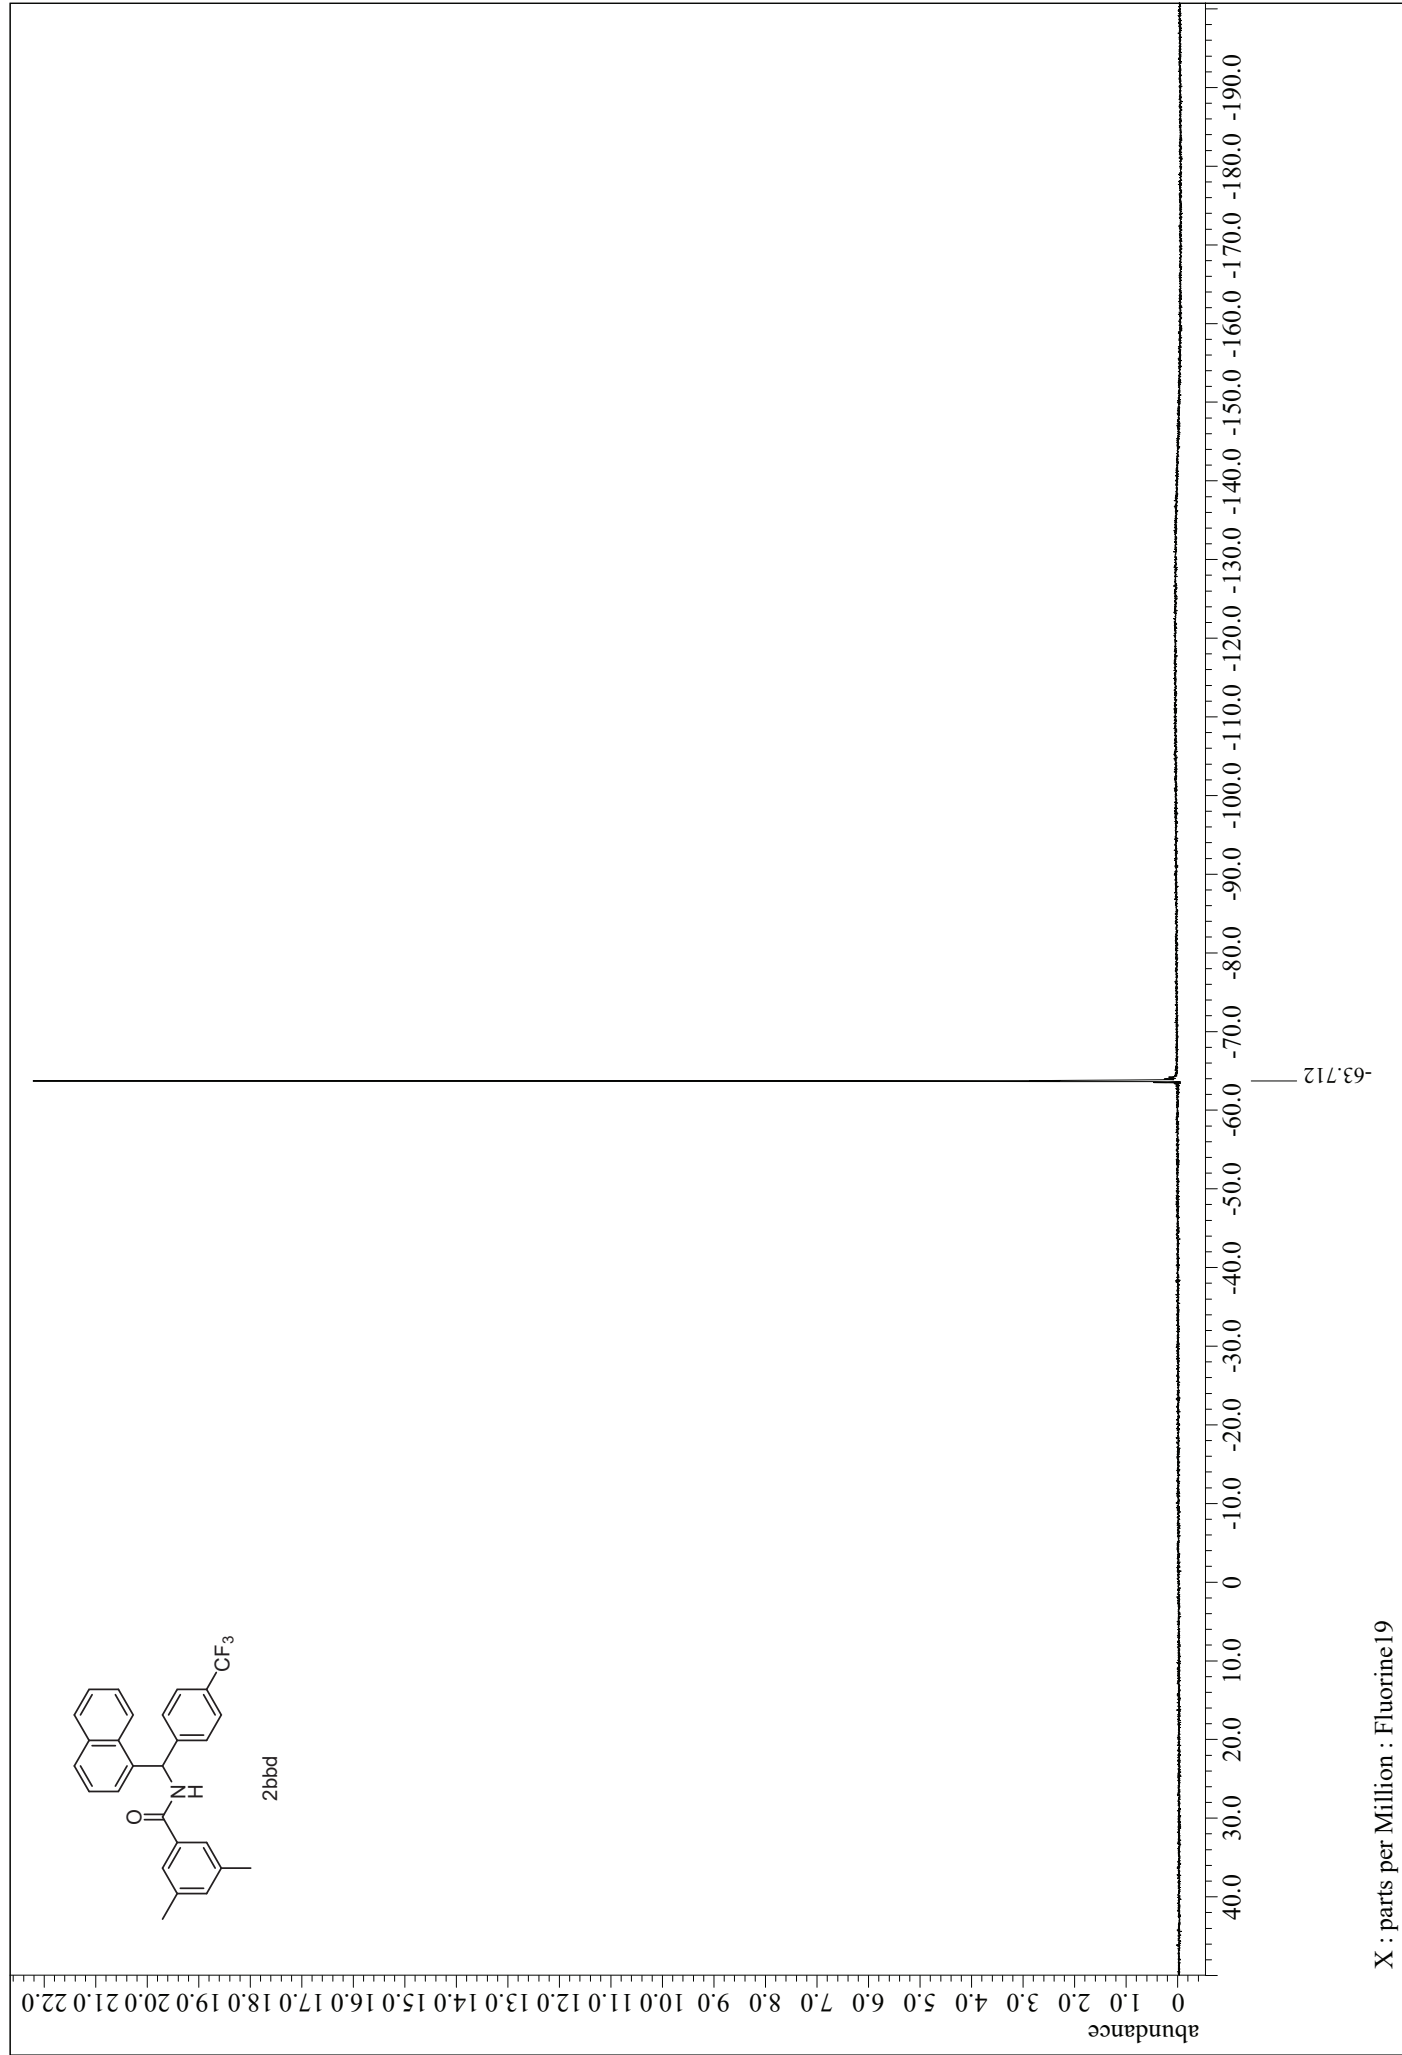

$^1\text{H NMR}$  (400 MHz,  $\text{CDCl}_3$ )

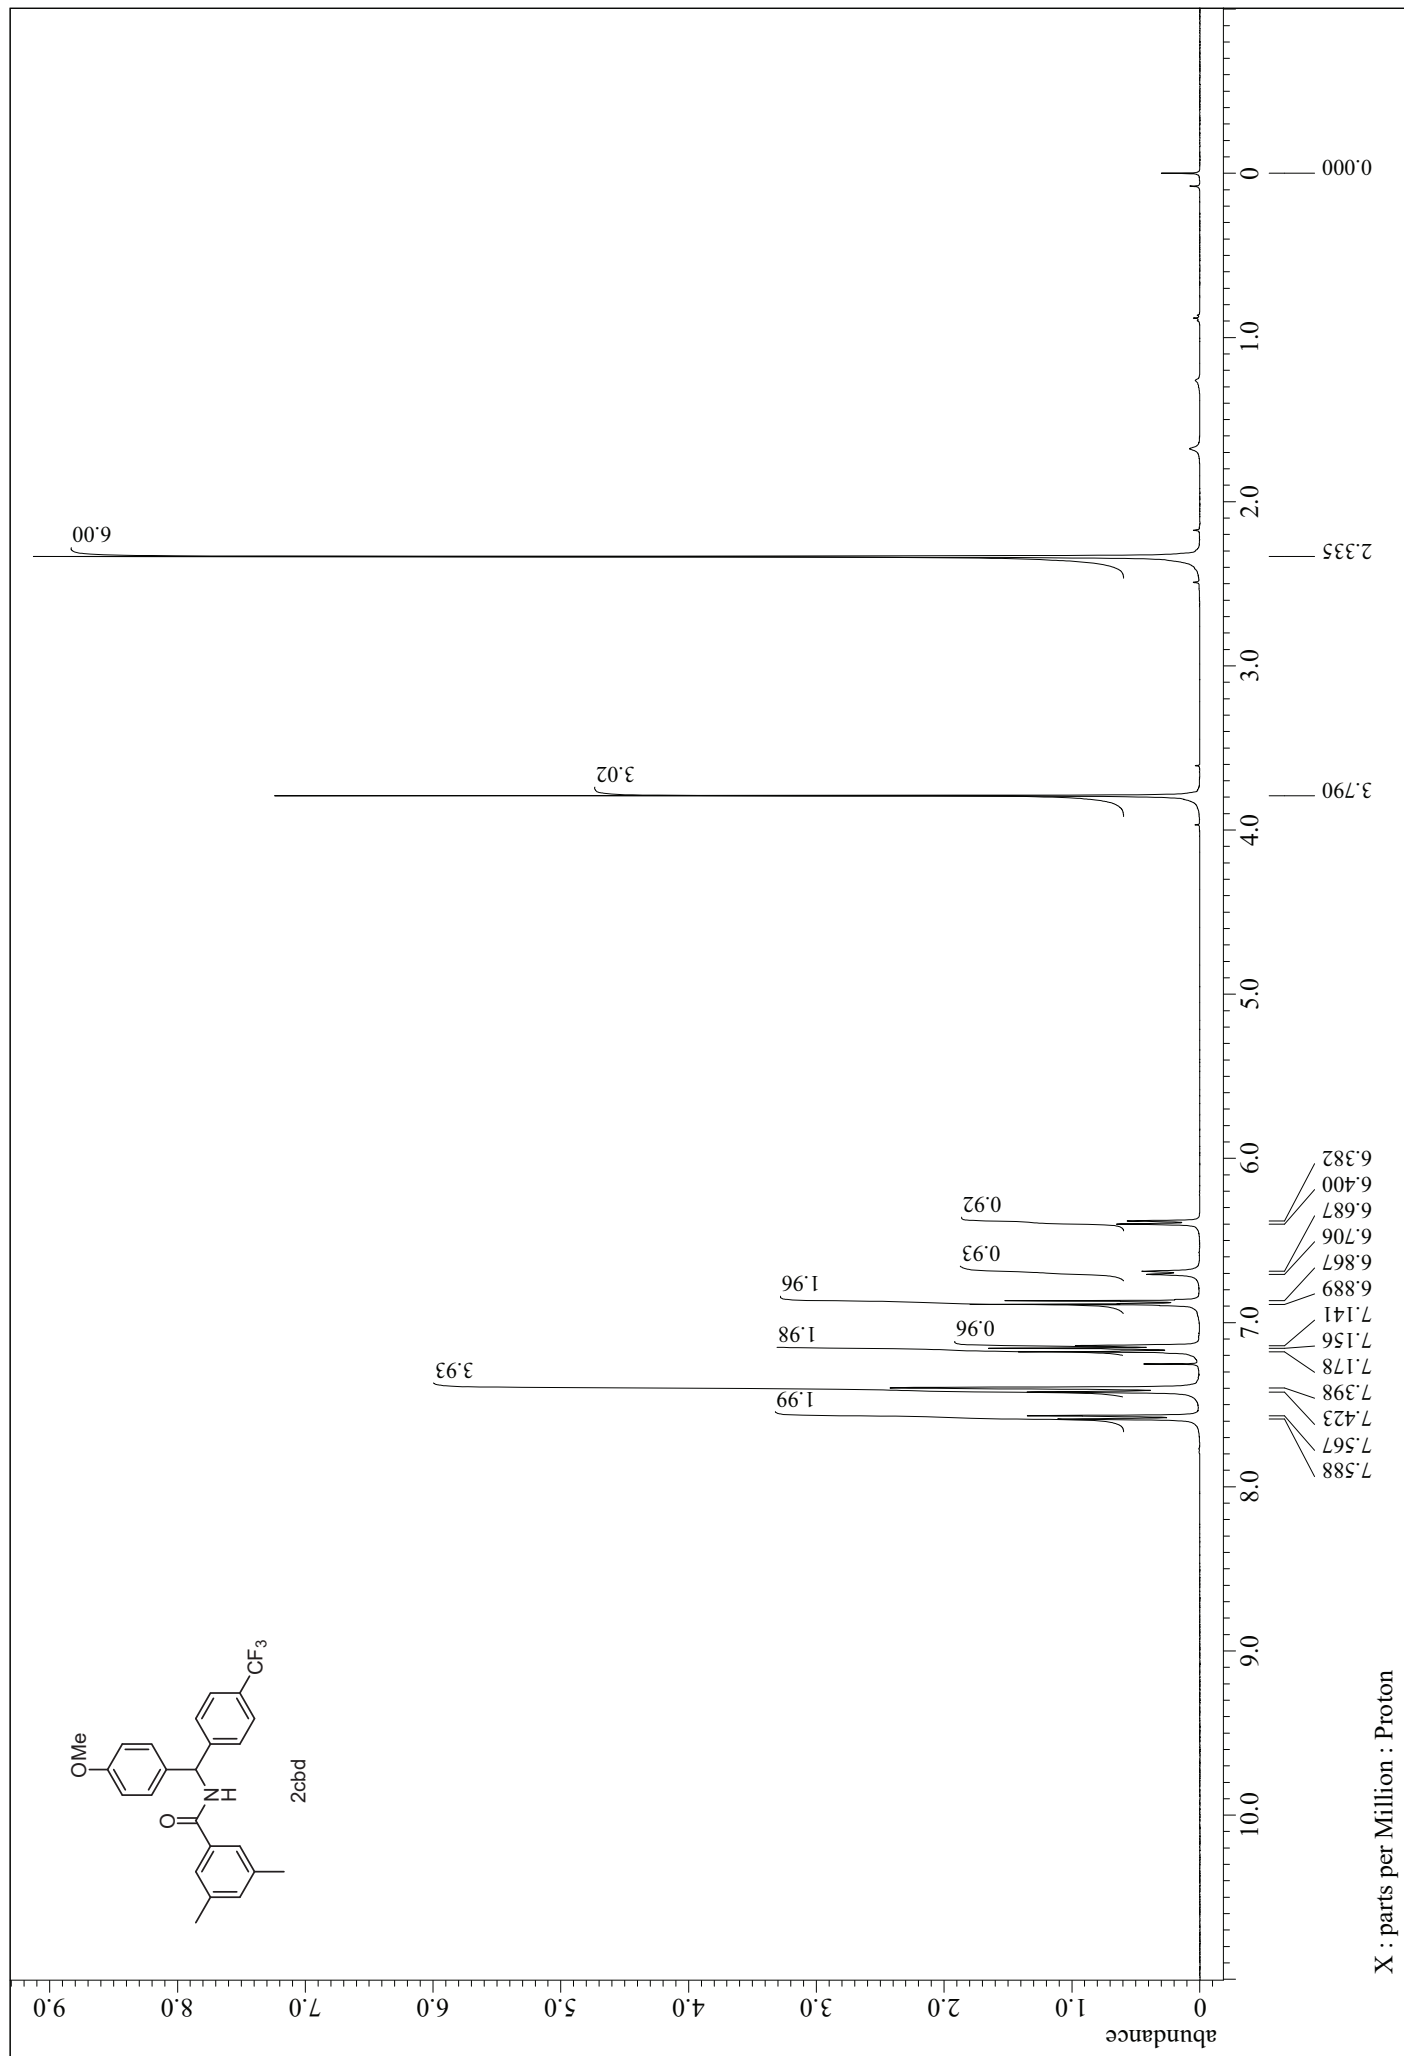

X : parts per Million : Proton



<sup>13</sup>C NMR (101 MHz, CDCl<sub>3</sub>)

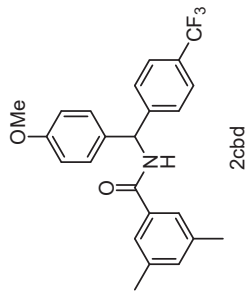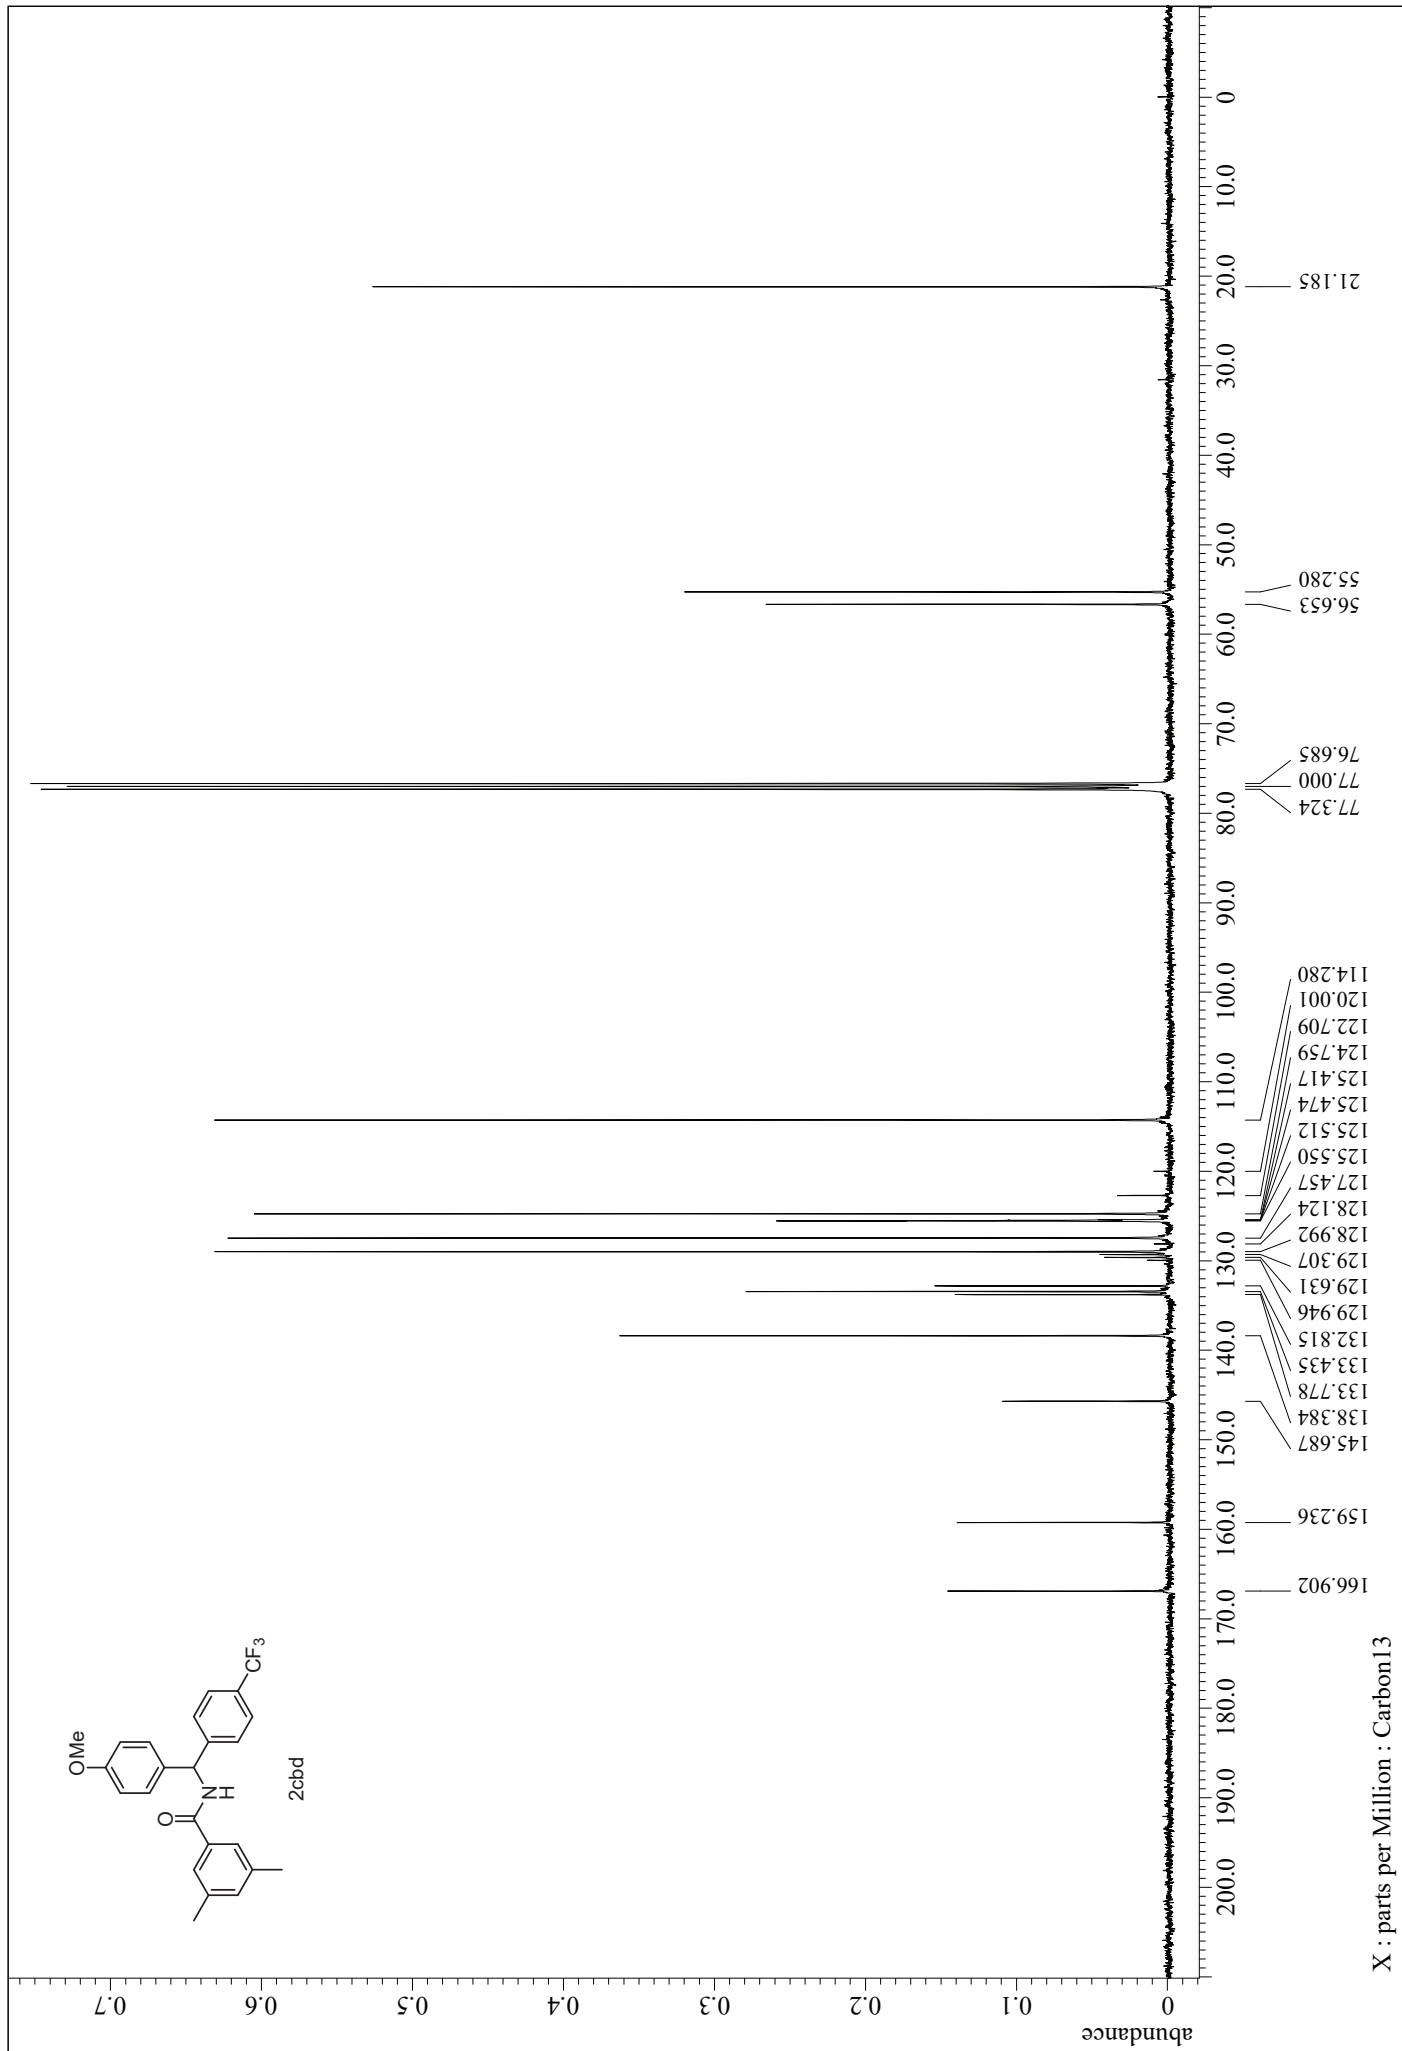

$^{19}\text{F}$  NMR (376 MHz,  $\text{CDCl}_3$ )

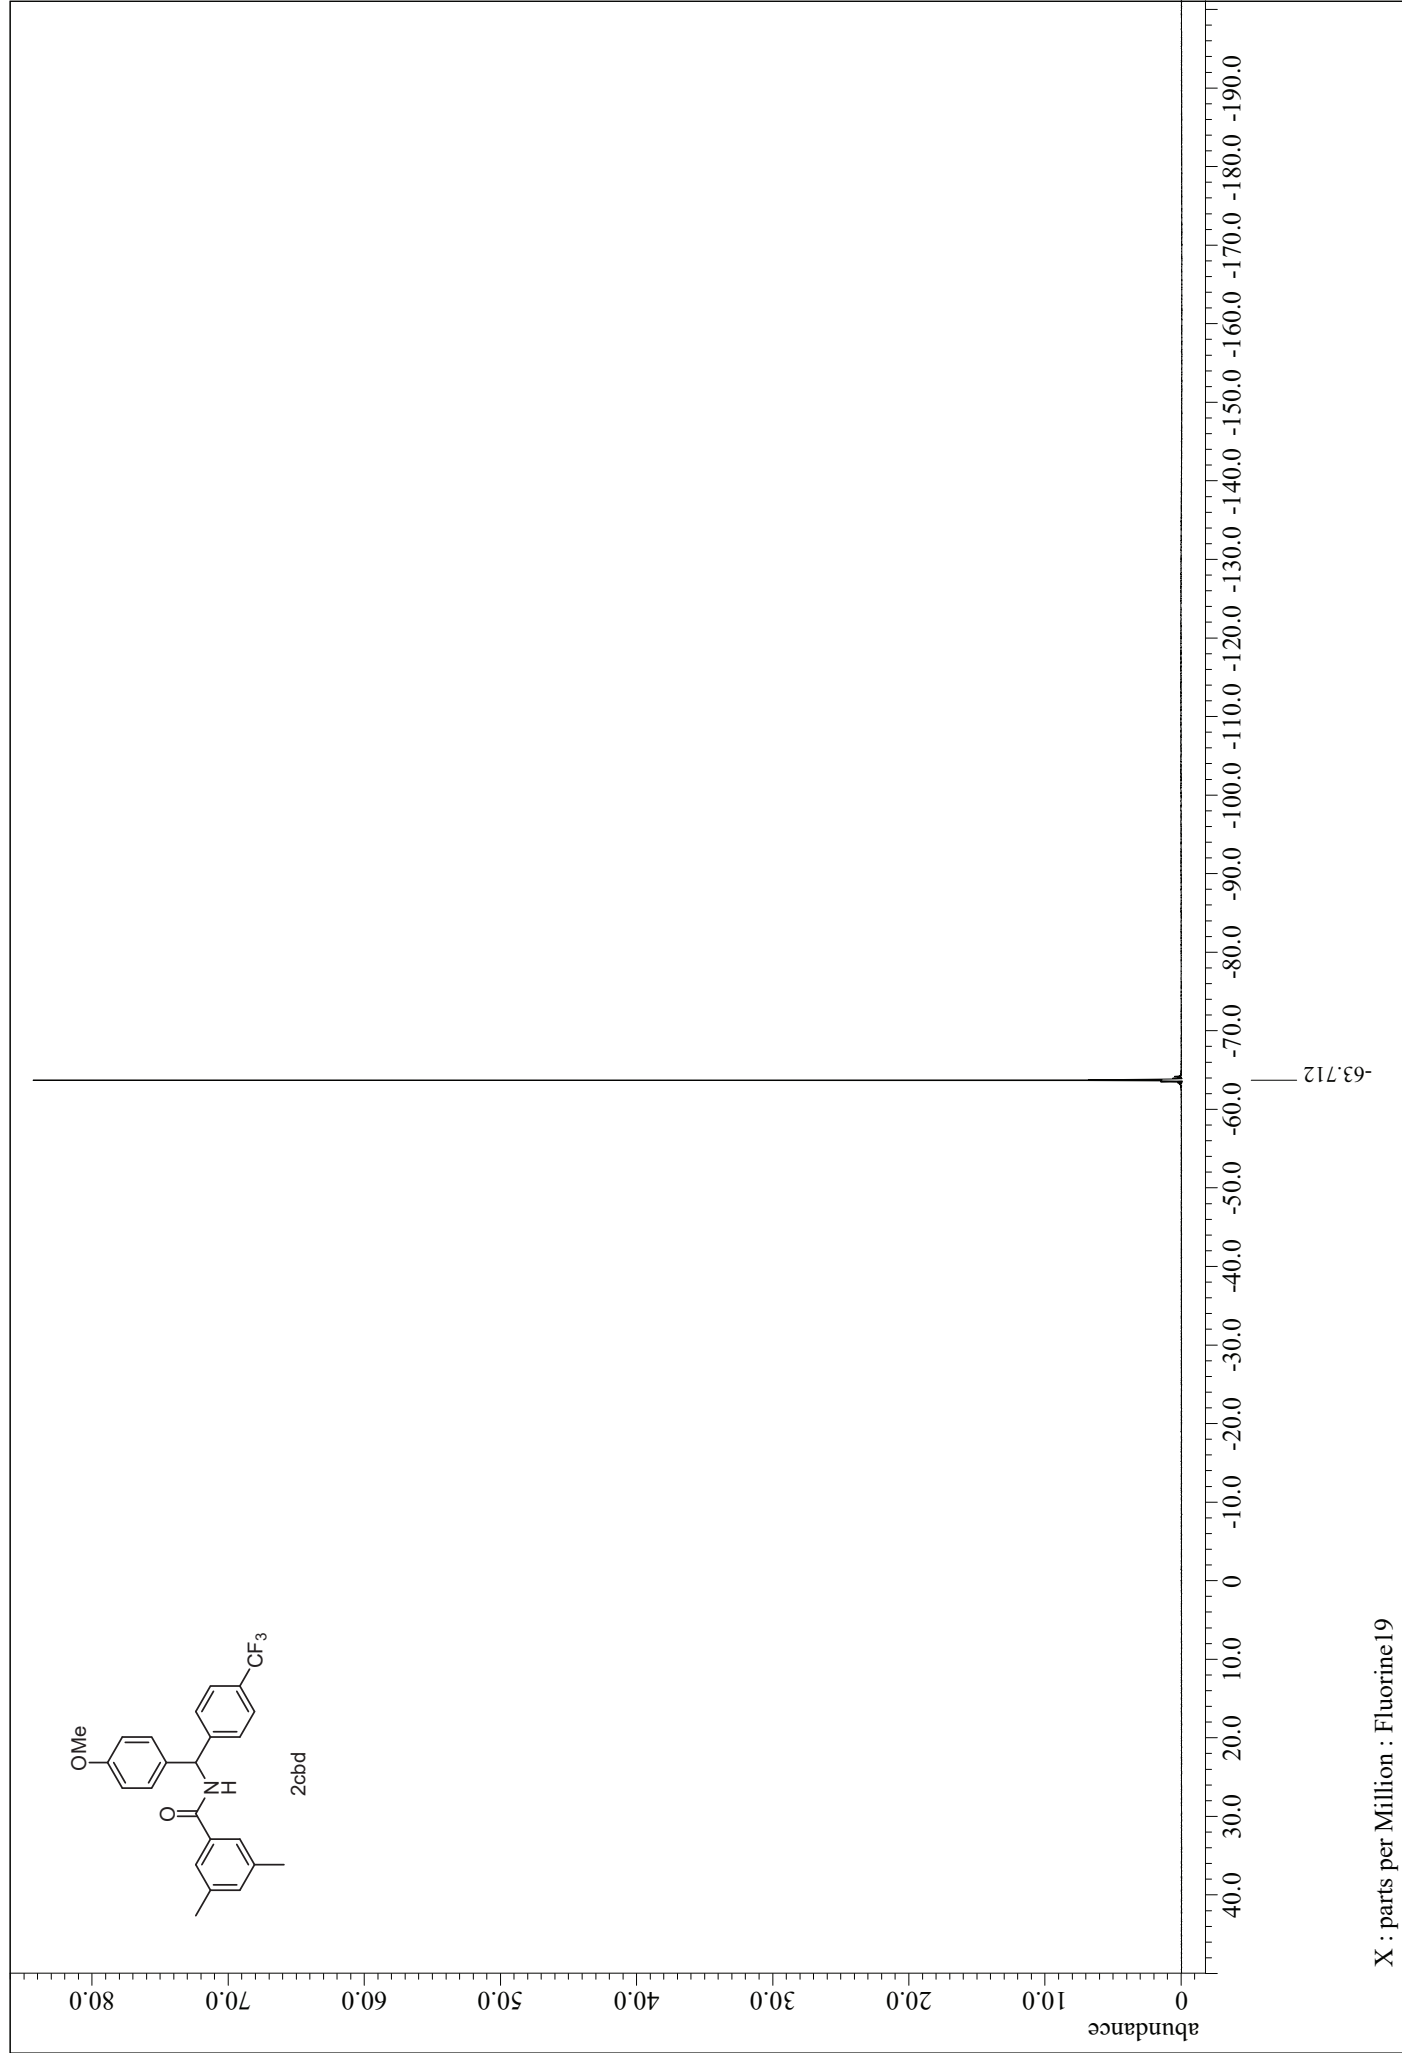

<sup>1</sup>H NMR (400 MHz, CDCl<sub>3</sub>)

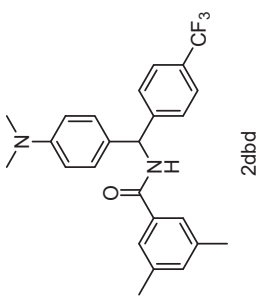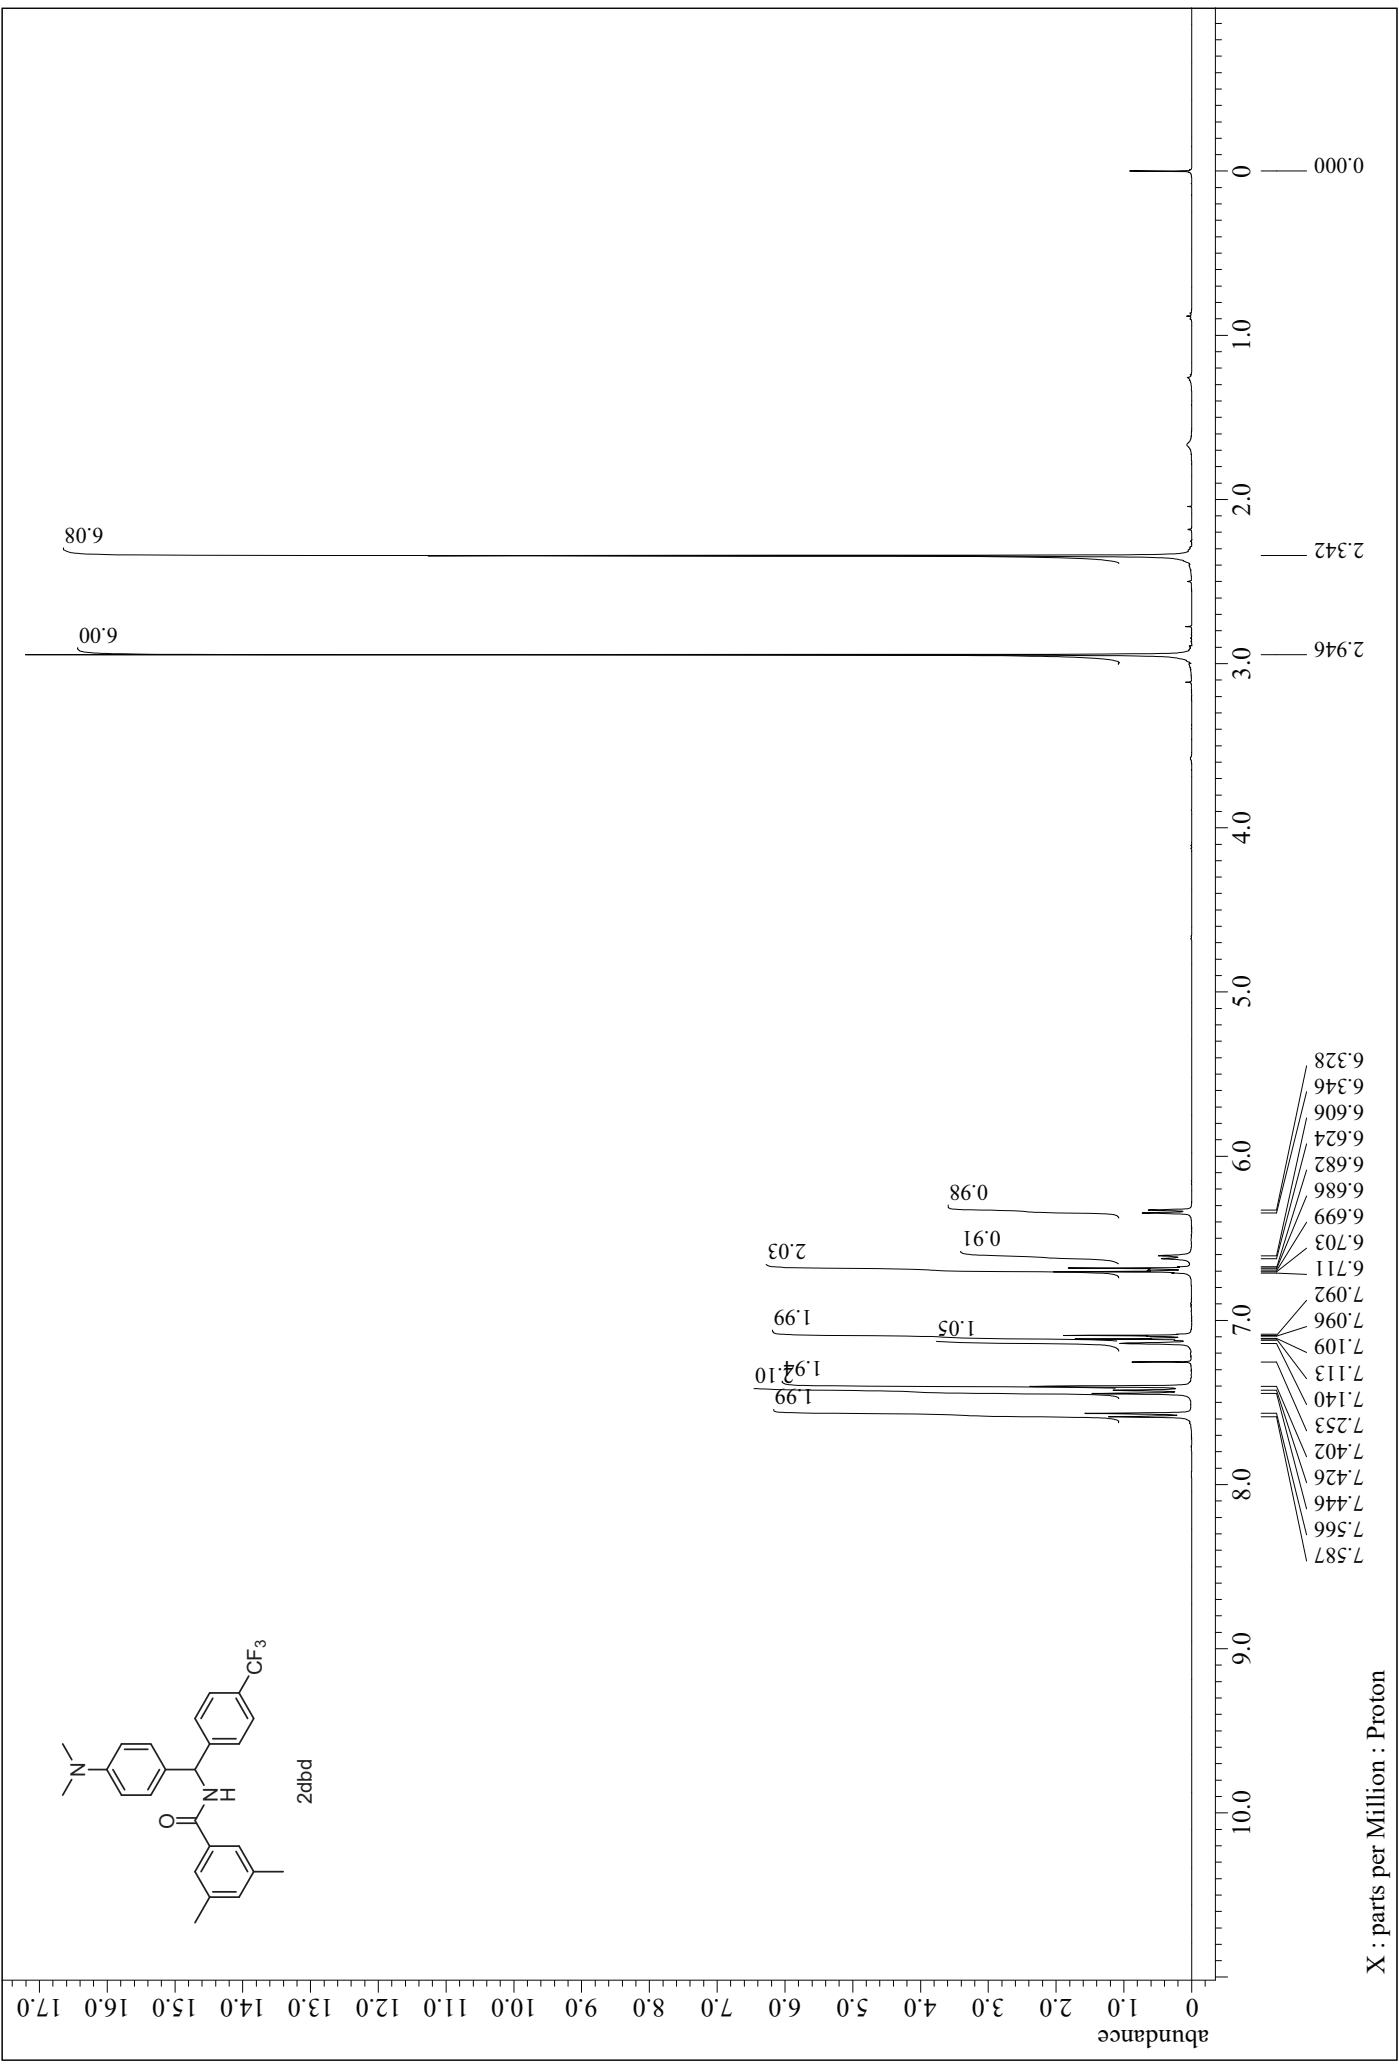

<sup>13</sup>C NMR (101 MHz, CDCl<sub>3</sub>)

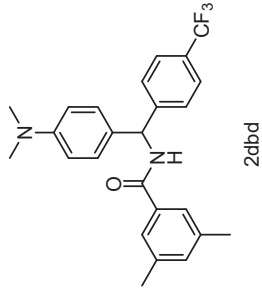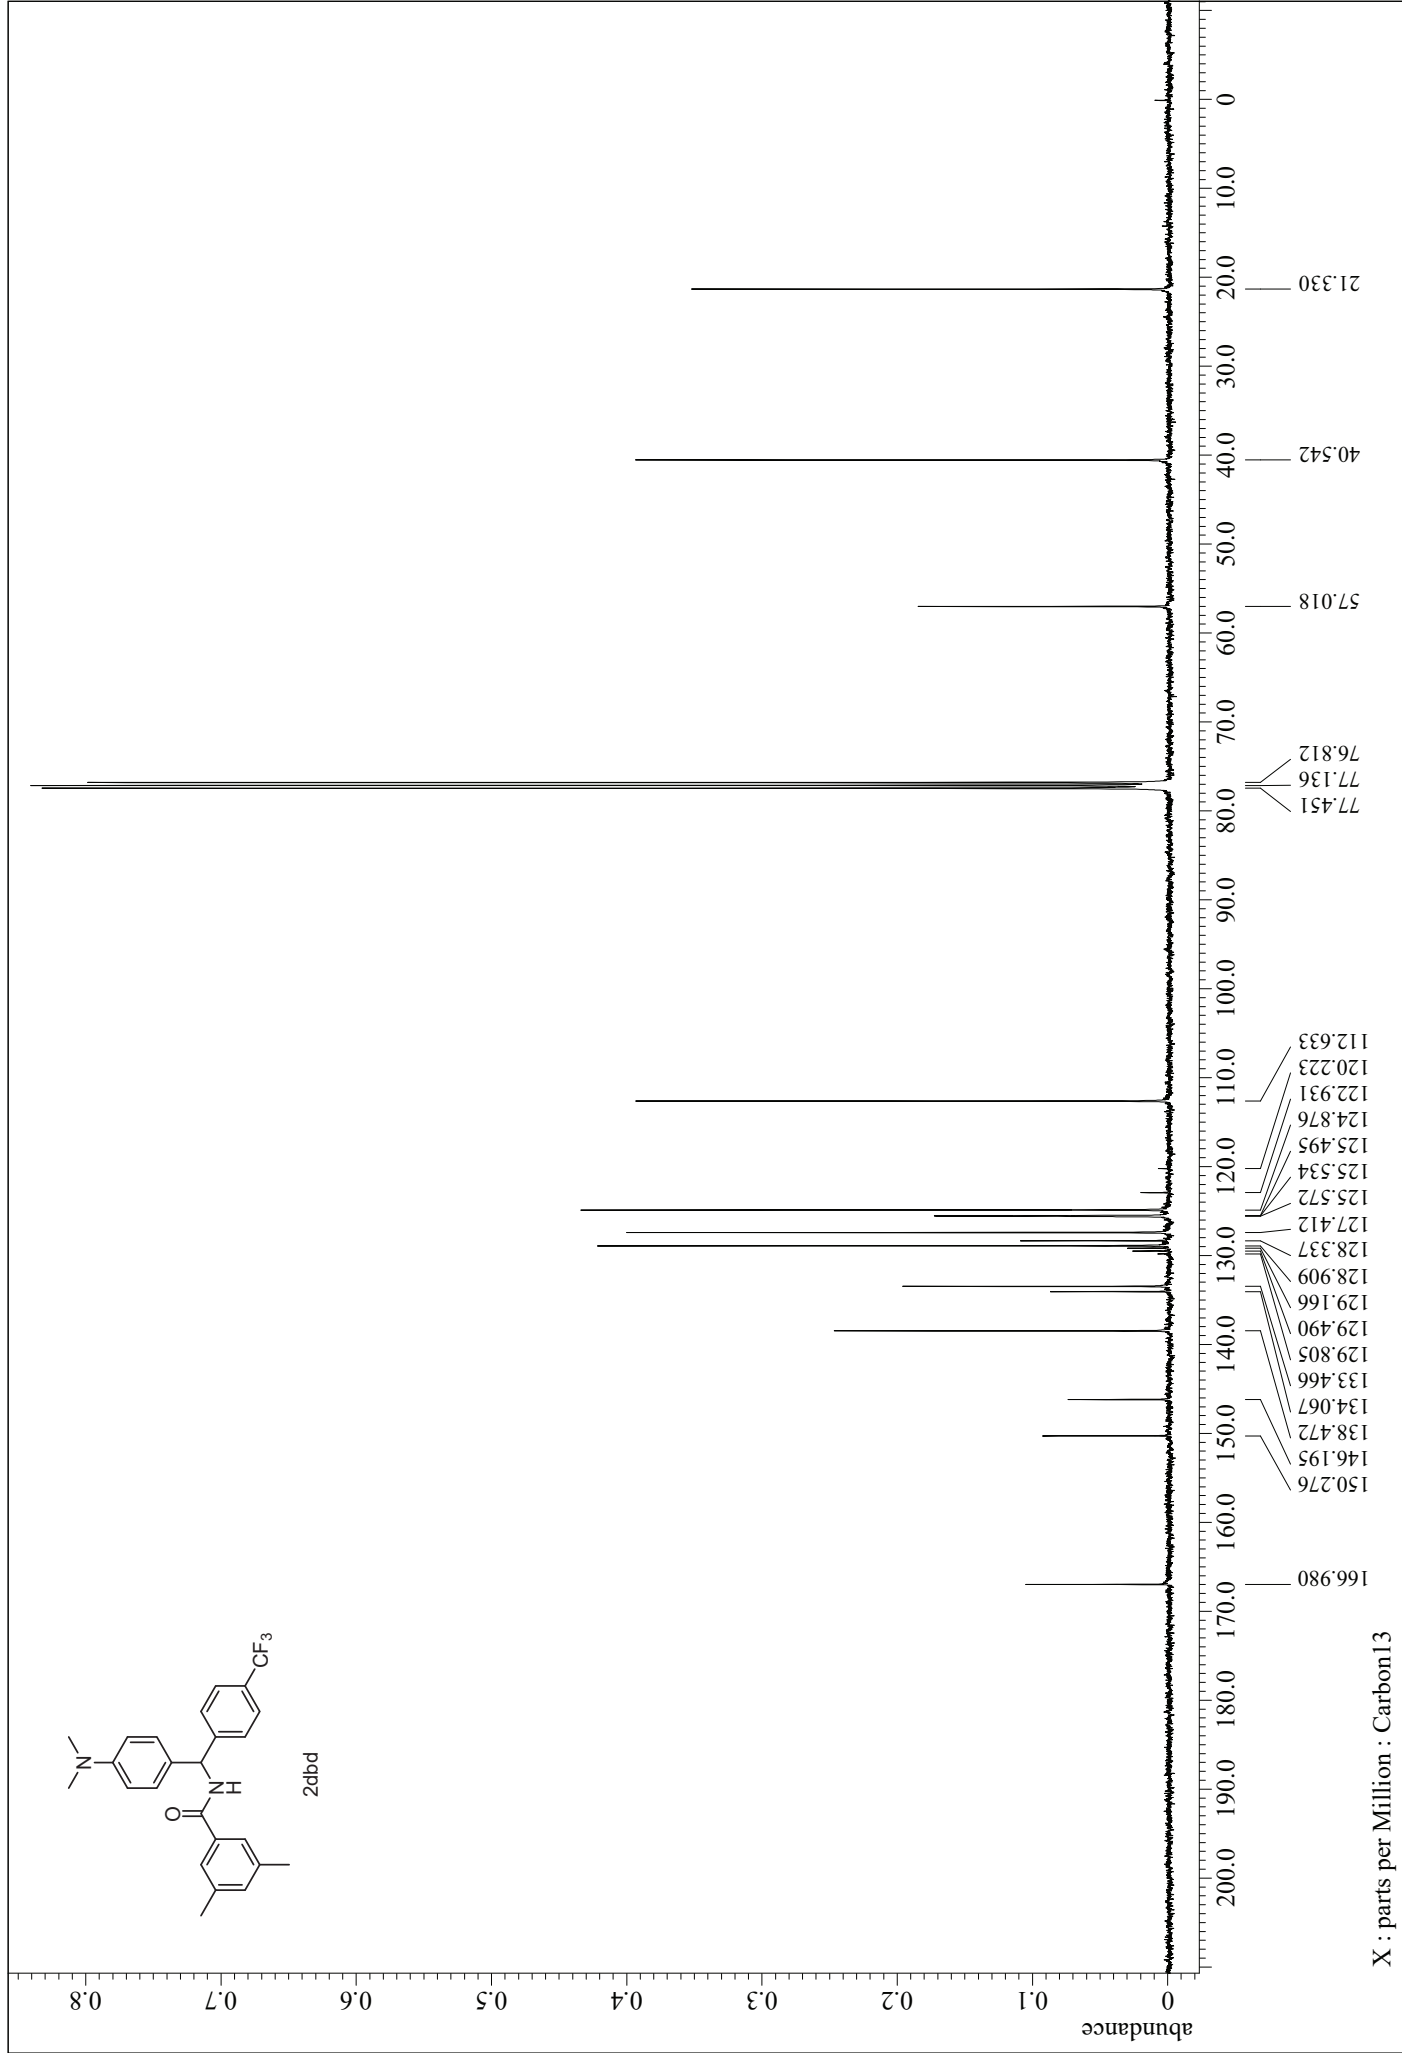

$^{19}\text{F}$  NMR (376 MHz,  $\text{CDCl}_3$ )

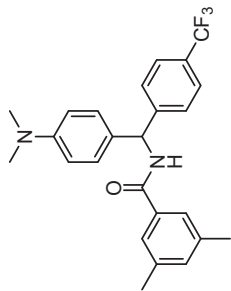

2dbd

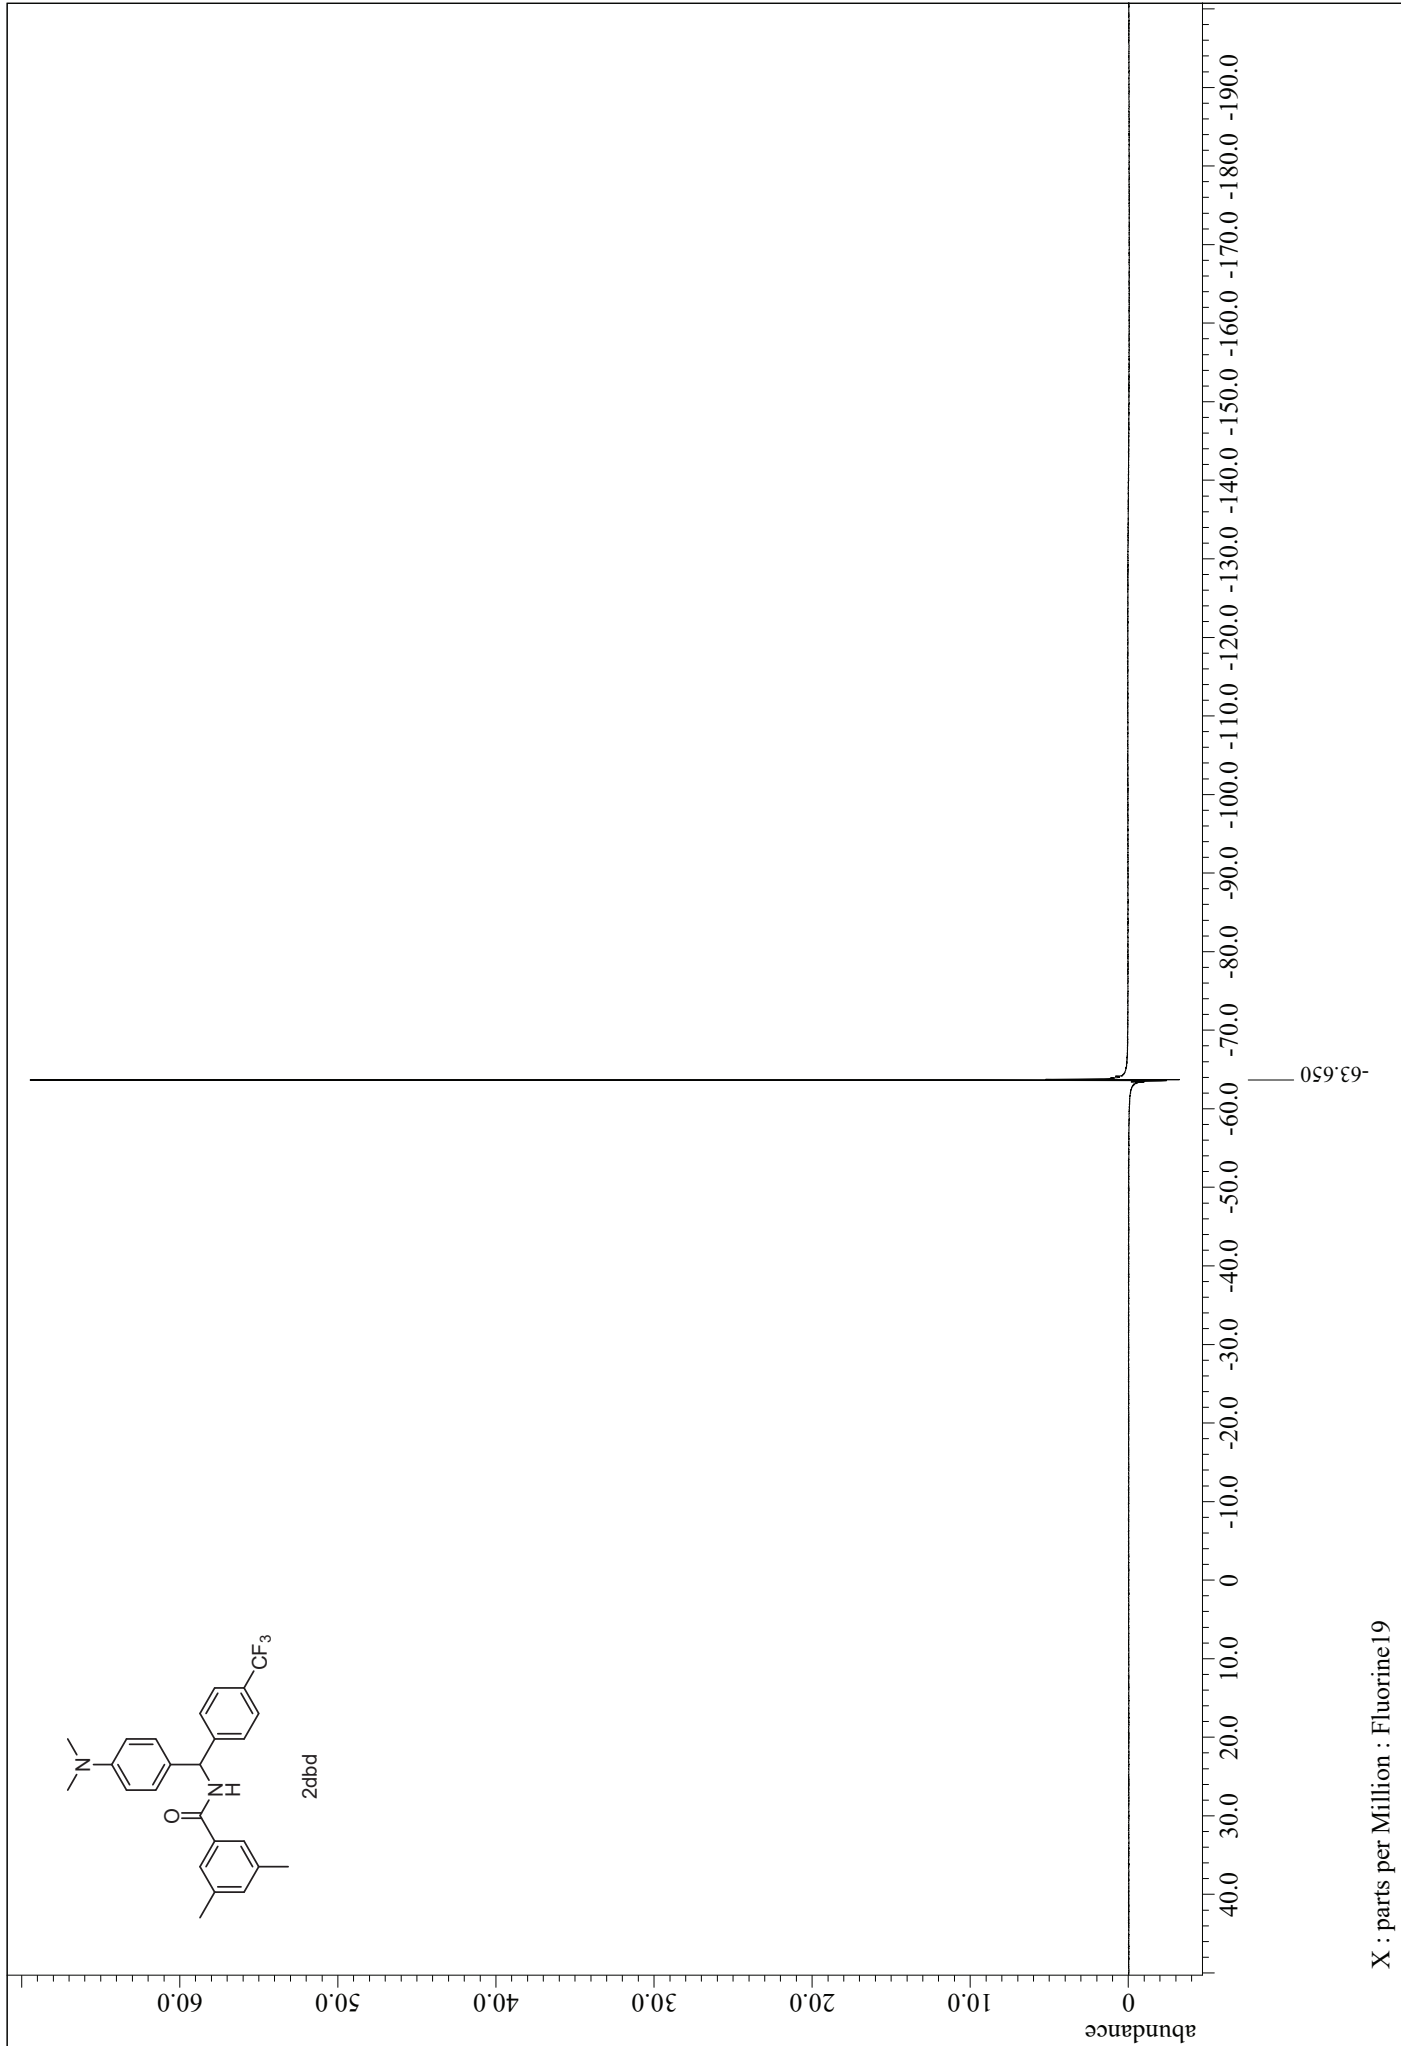

<sup>1</sup>H NMR (400 MHz, CDCl<sub>3</sub>)

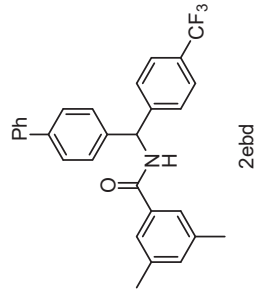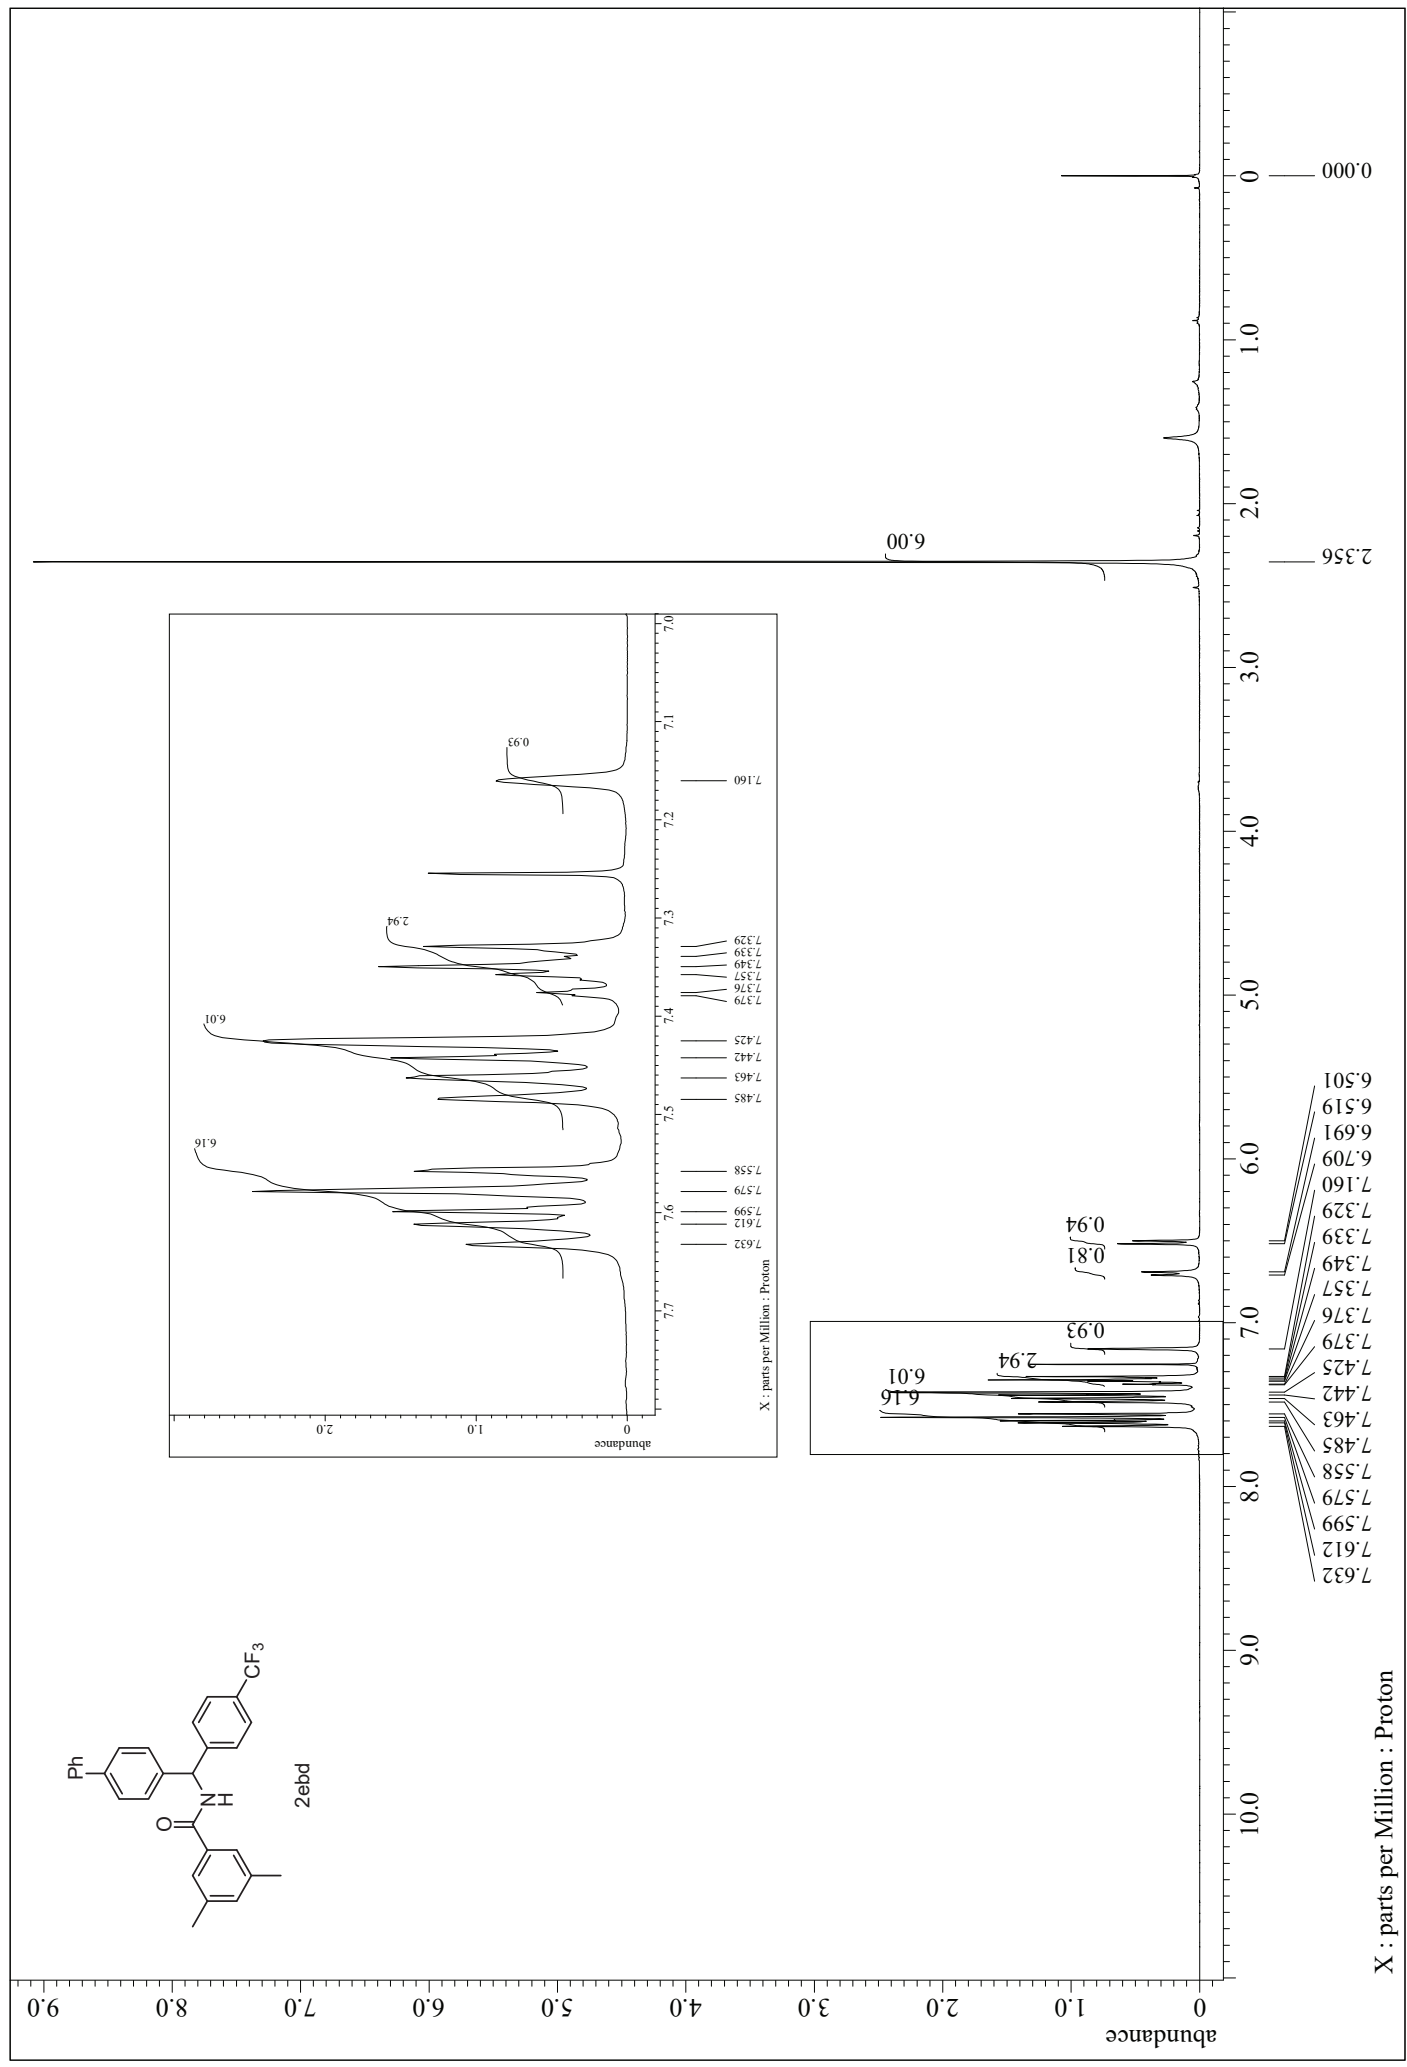

<sup>13</sup>C NMR (101 MHz, CDCl<sub>3</sub>)

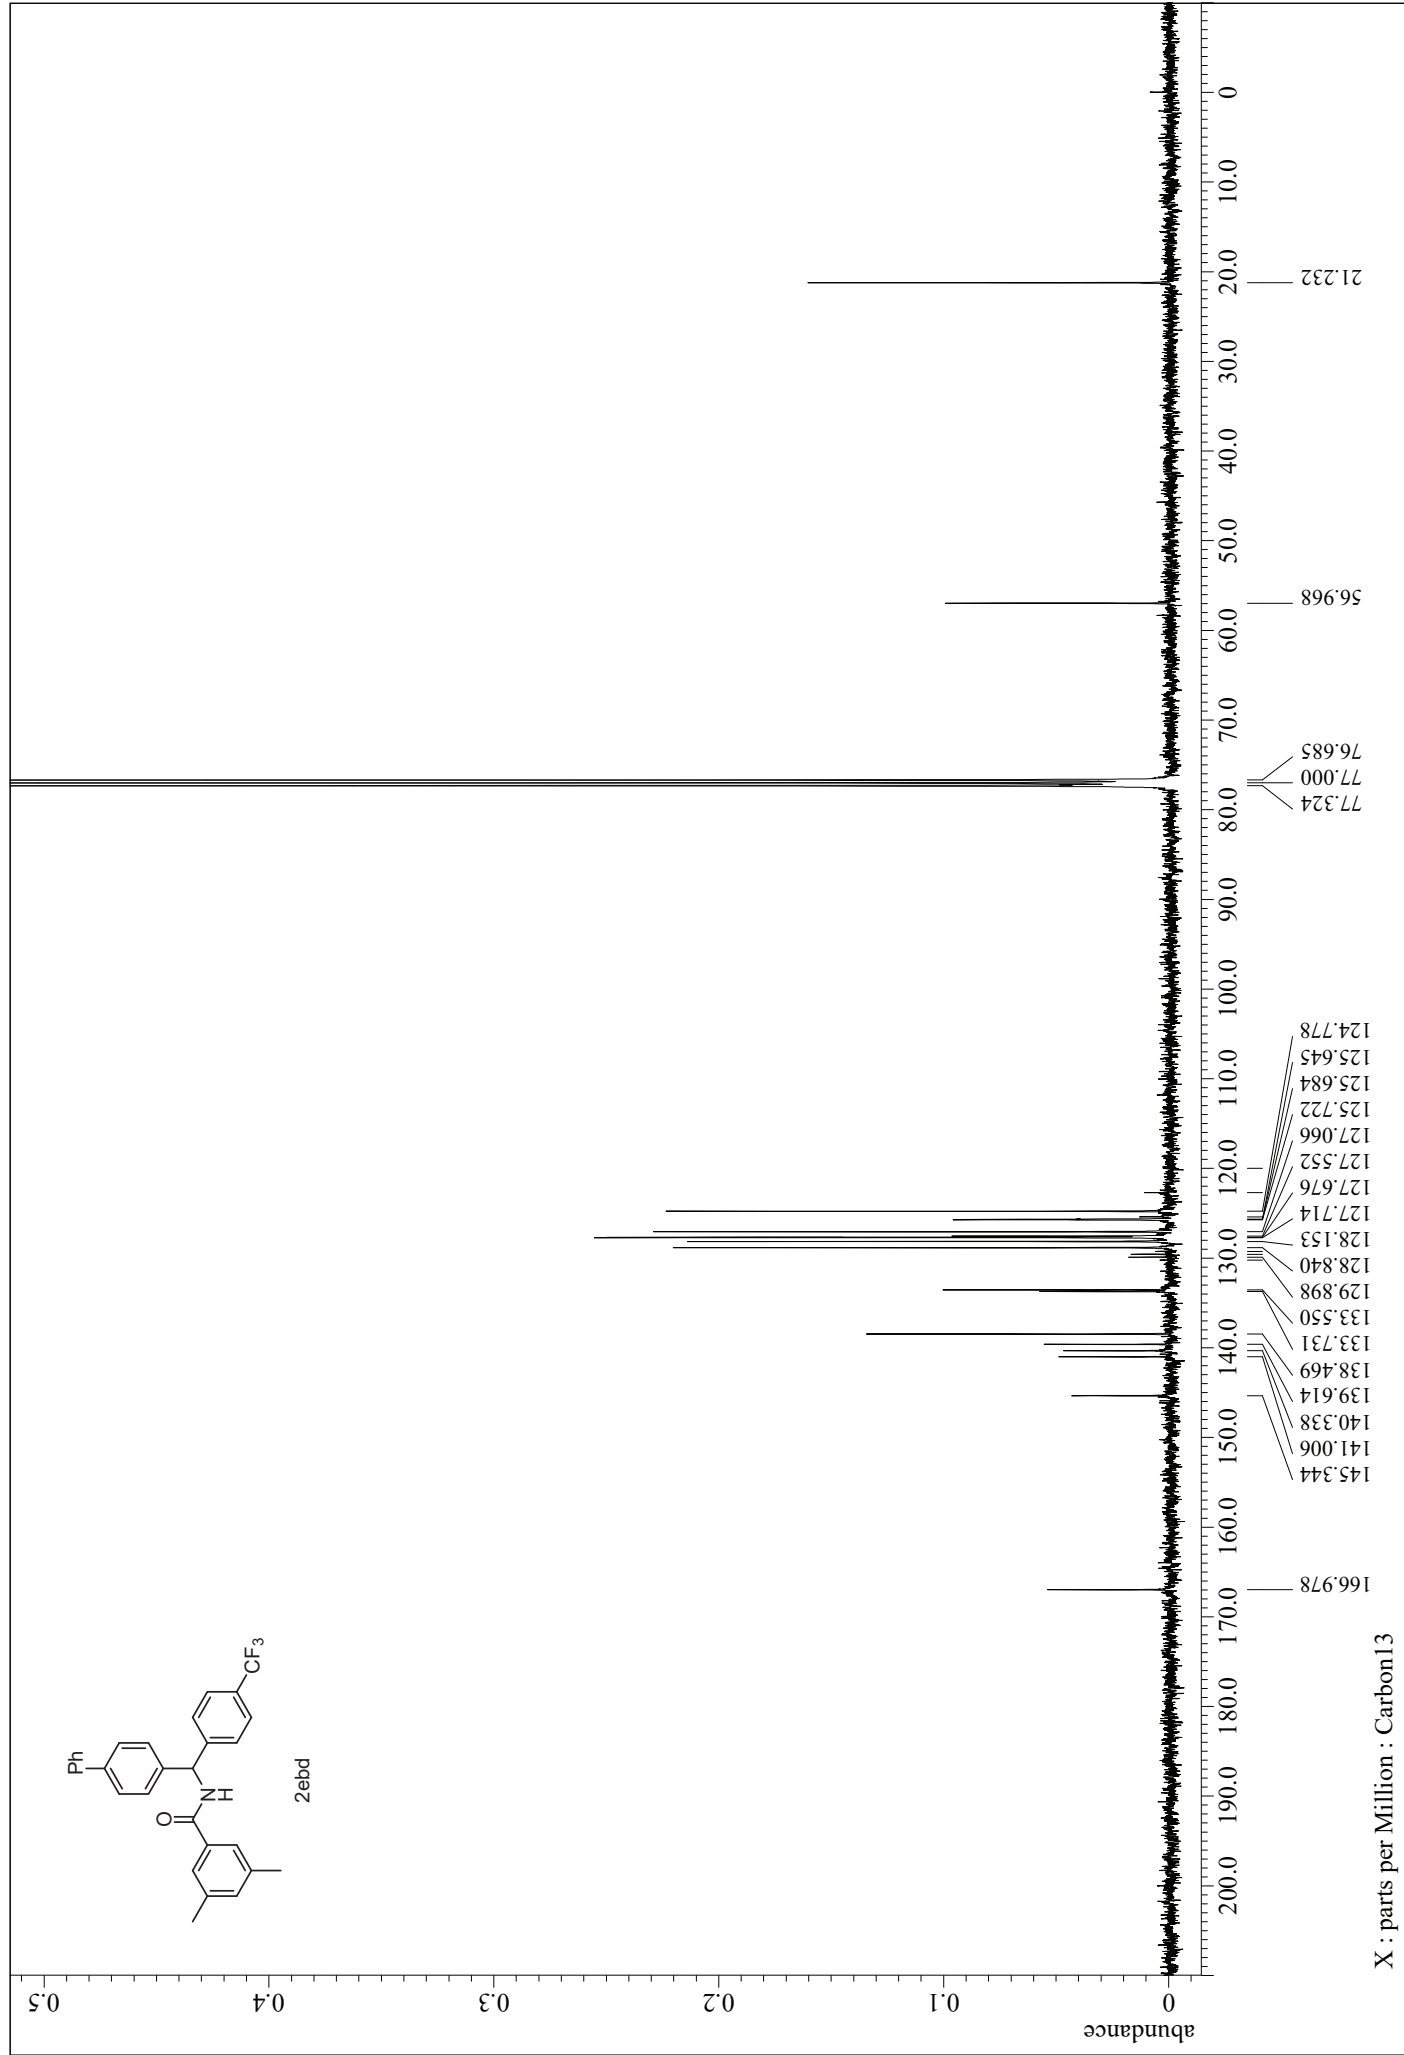

X : parts per Million : Carbon13

<sup>19</sup>F NMR (376 MHz, CDCl<sub>3</sub>)

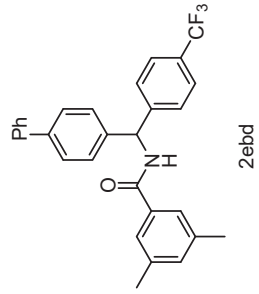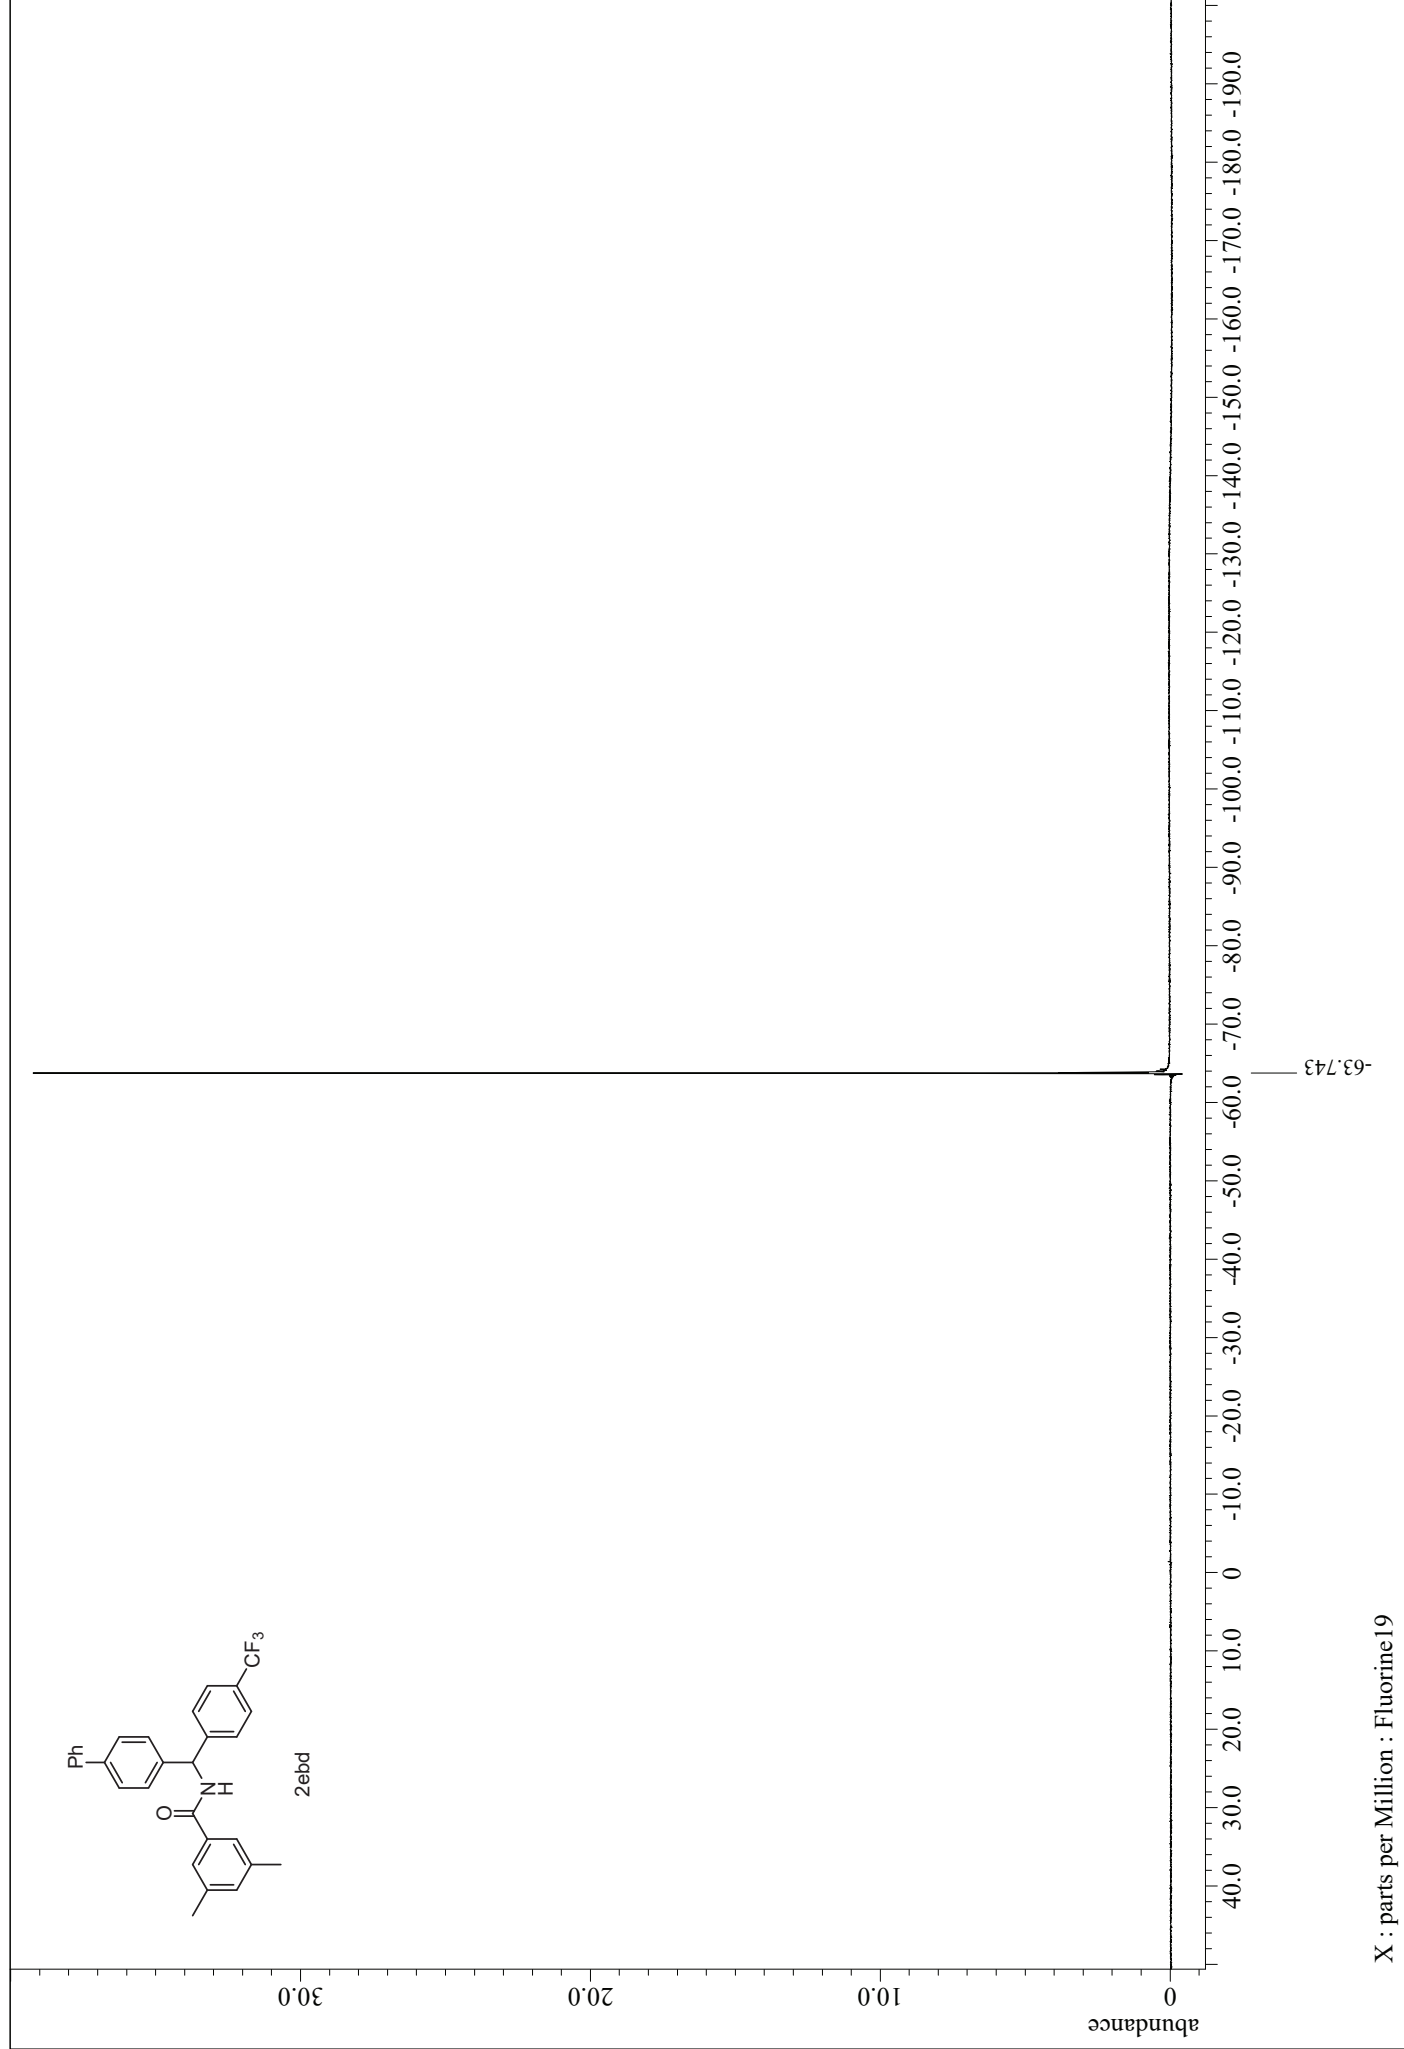

X : parts per Million : Fluorine 19



<sup>1</sup>H NMR (400 MHz, CDCl<sub>3</sub>)

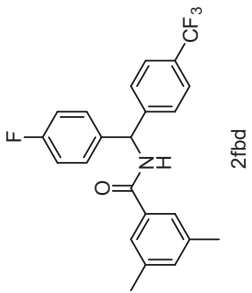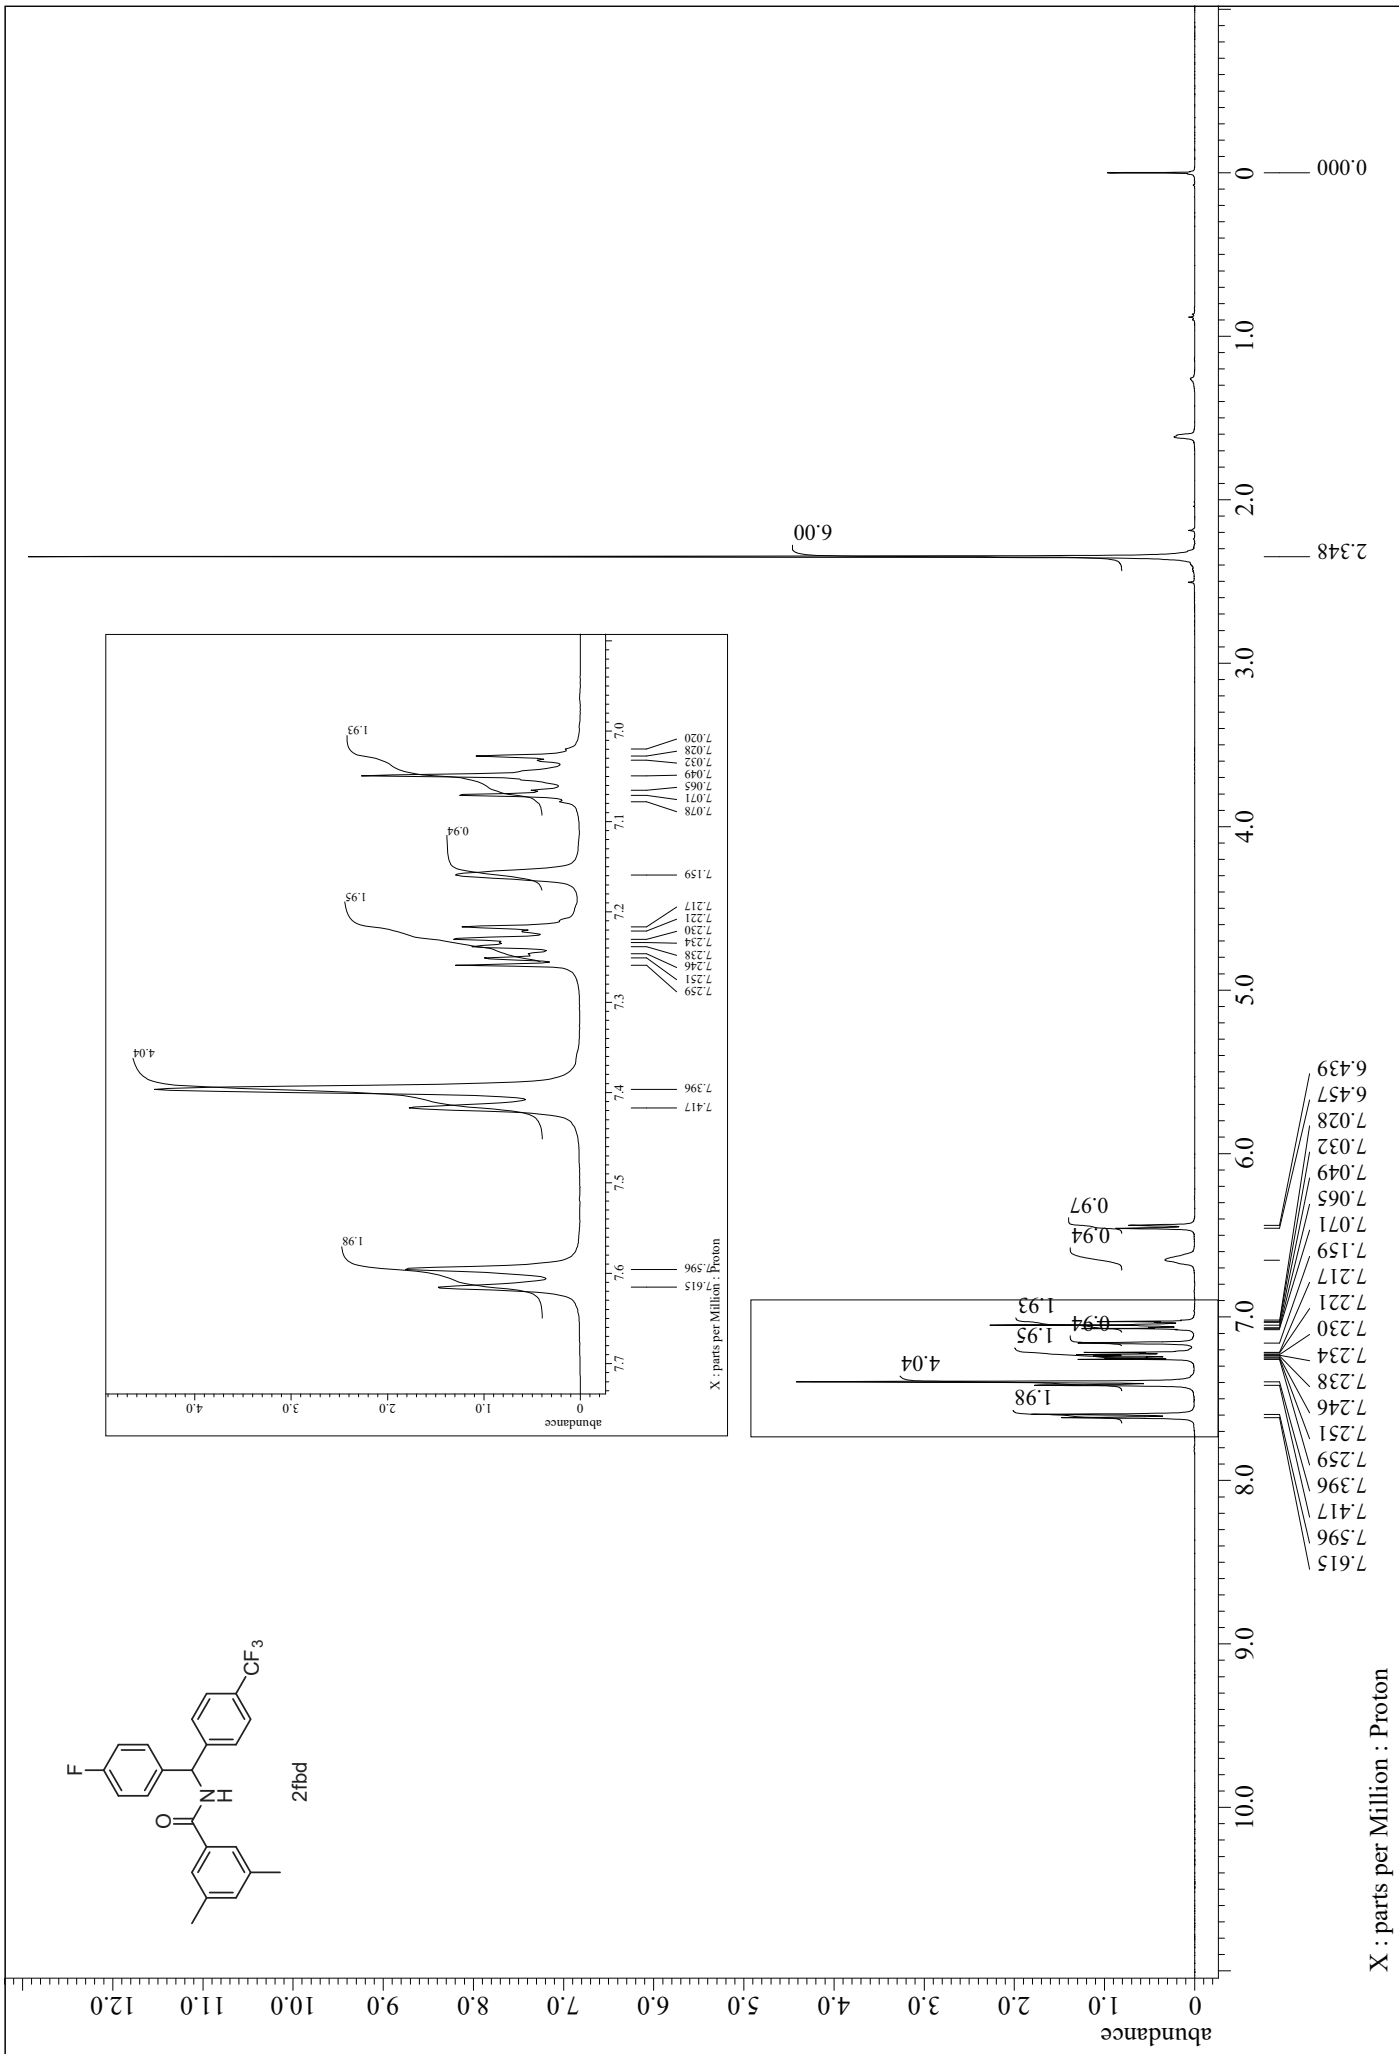

<sup>13</sup>C NMR (101 MHz, CDCl<sub>3</sub>)

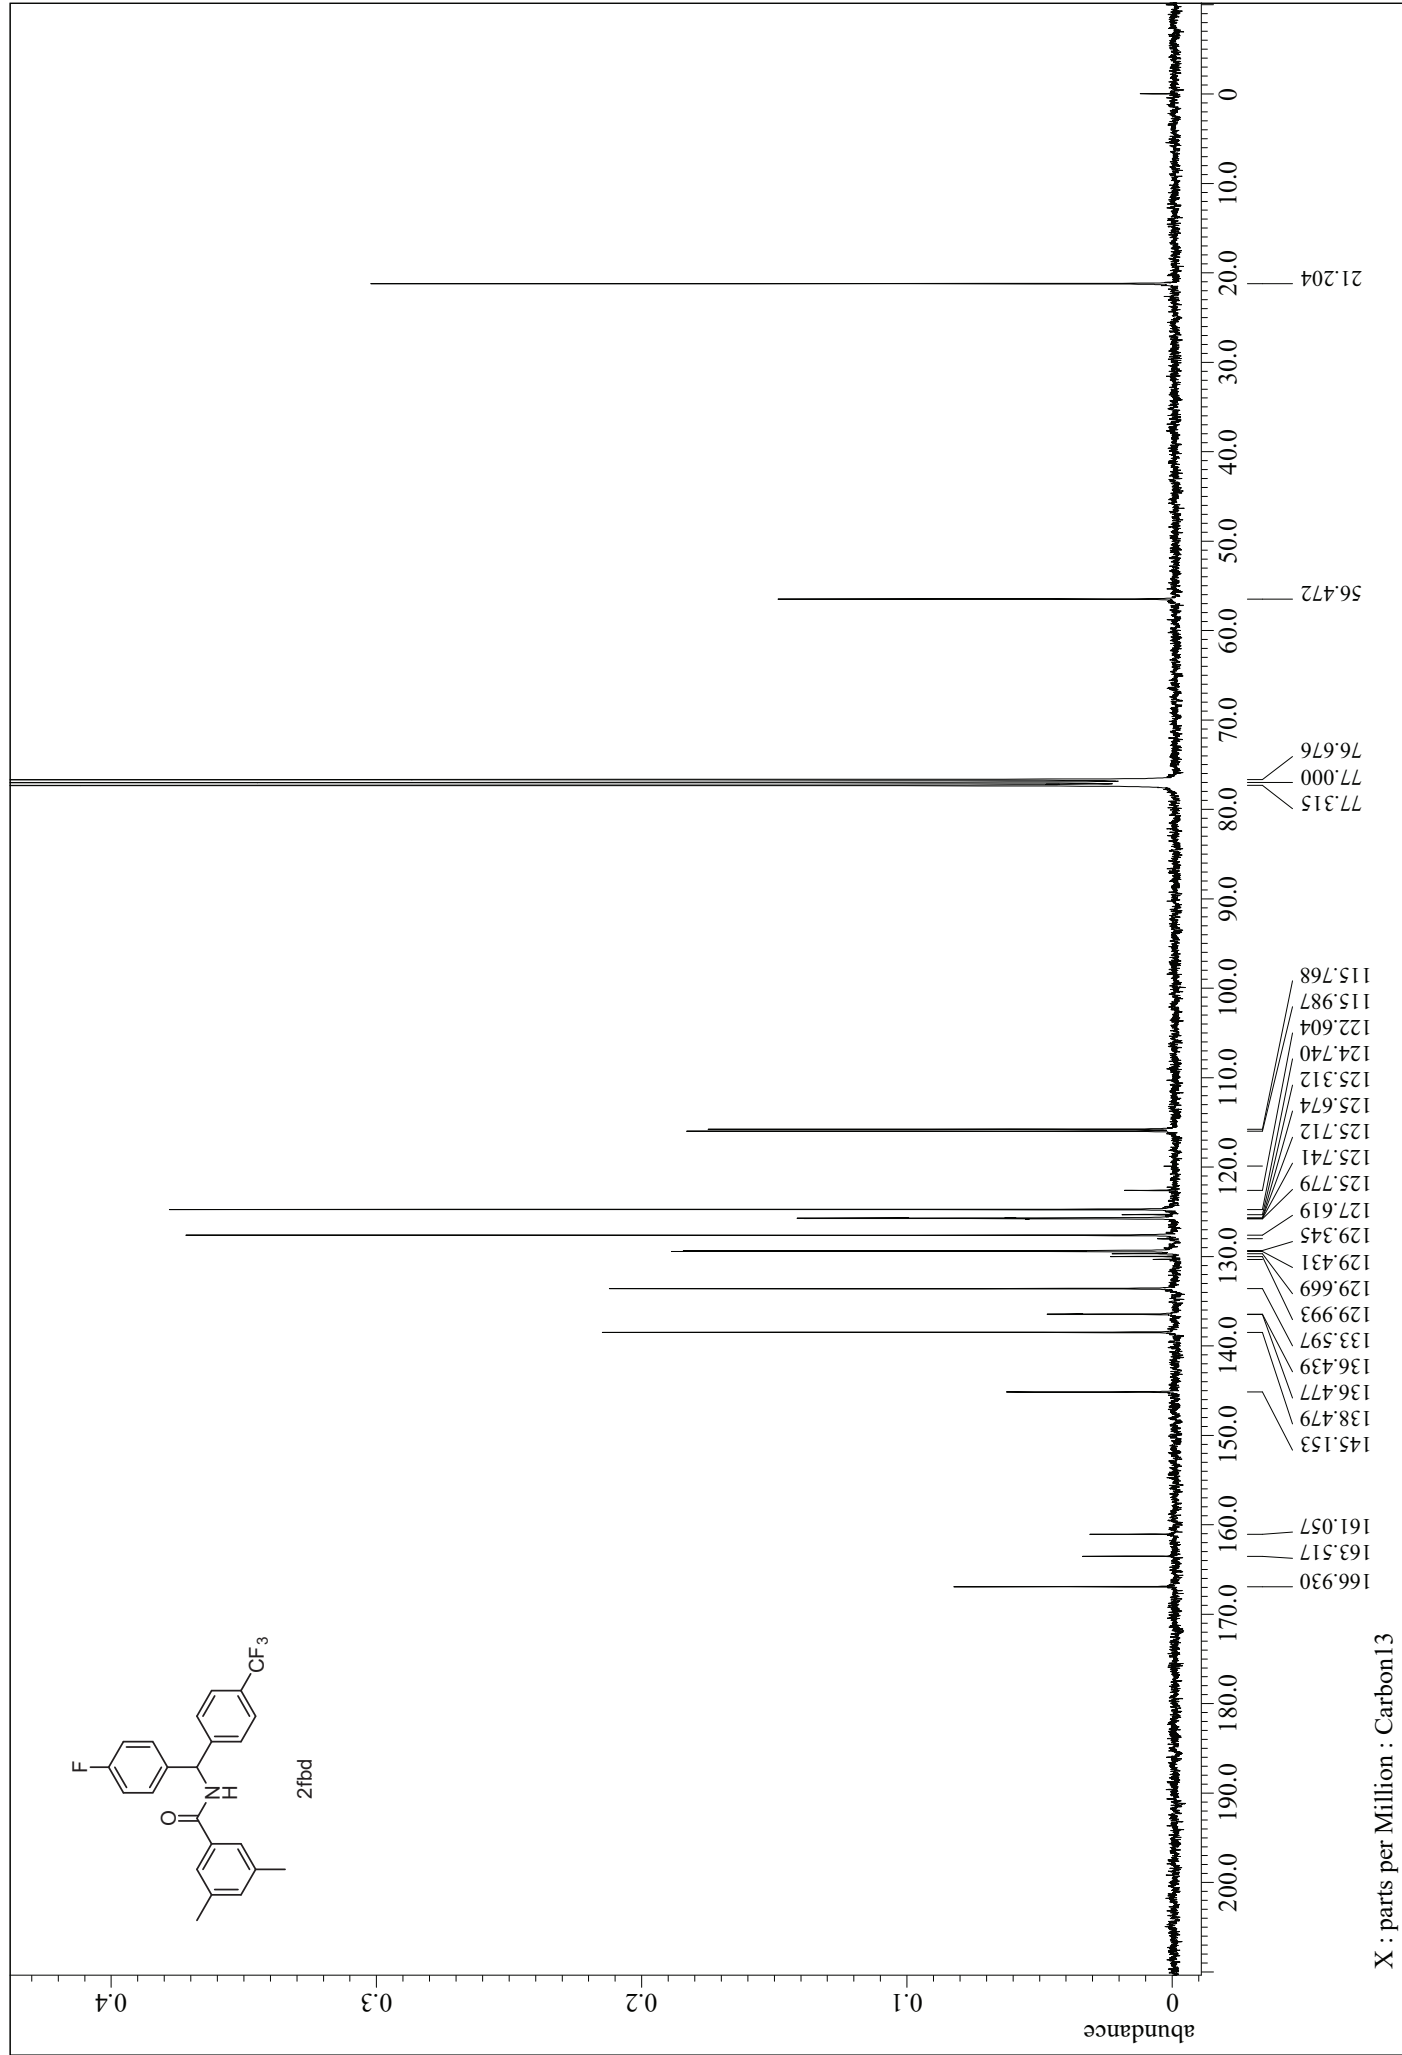

X : parts per Million : Carbon13

<sup>19</sup>F NMR (376 MHz, CDCl<sub>3</sub>)

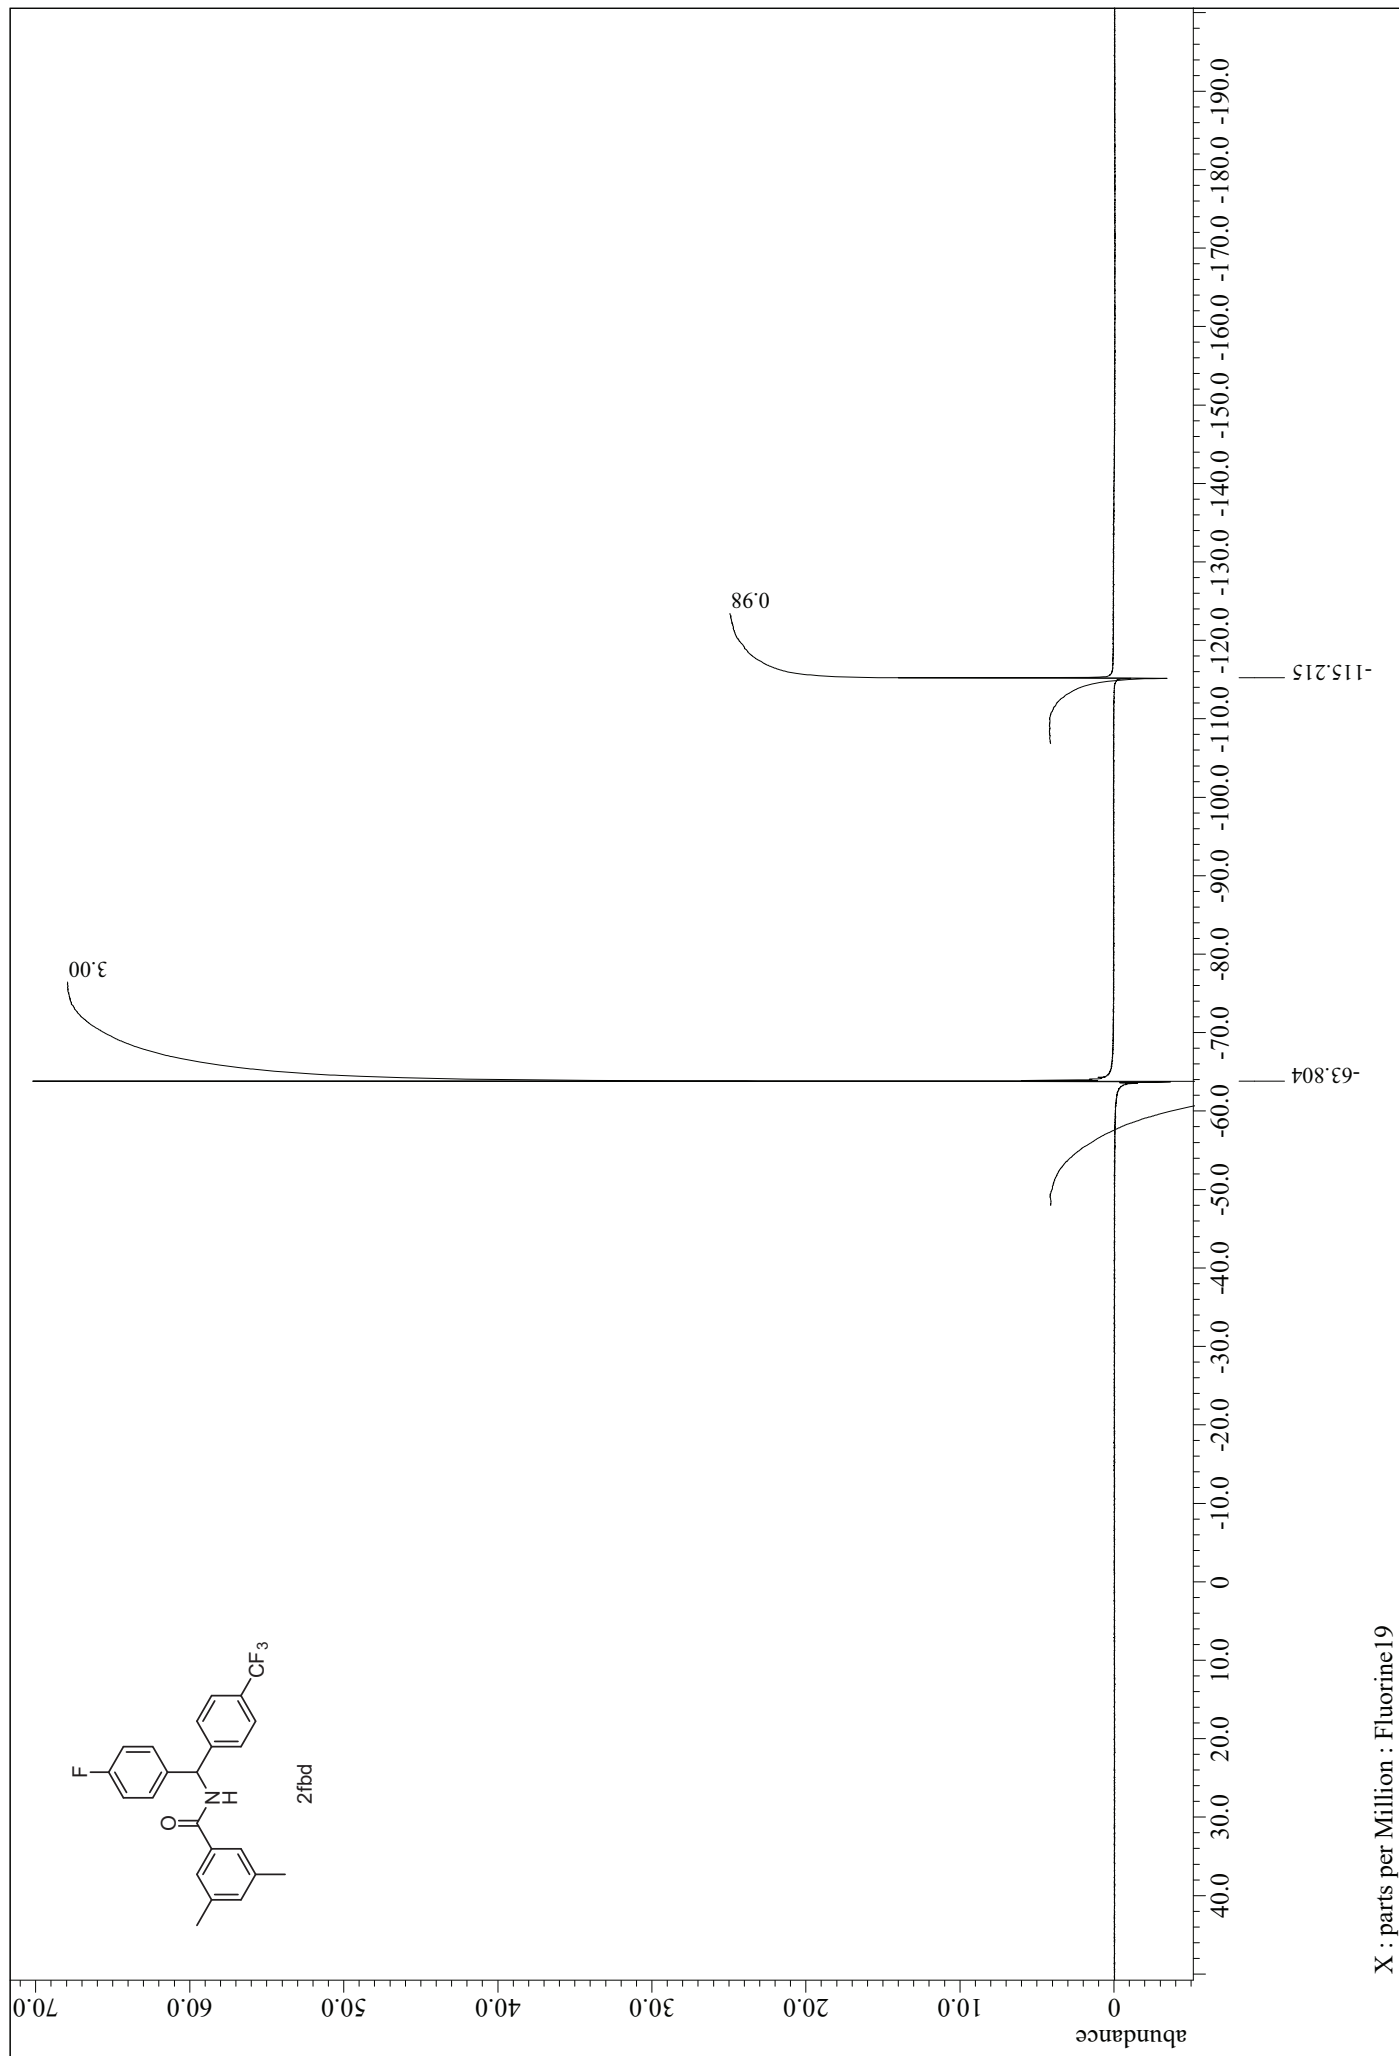

<sup>1</sup>H NMR (400 MHz, CDCl<sub>3</sub>)

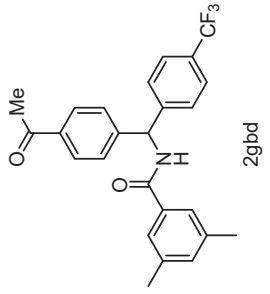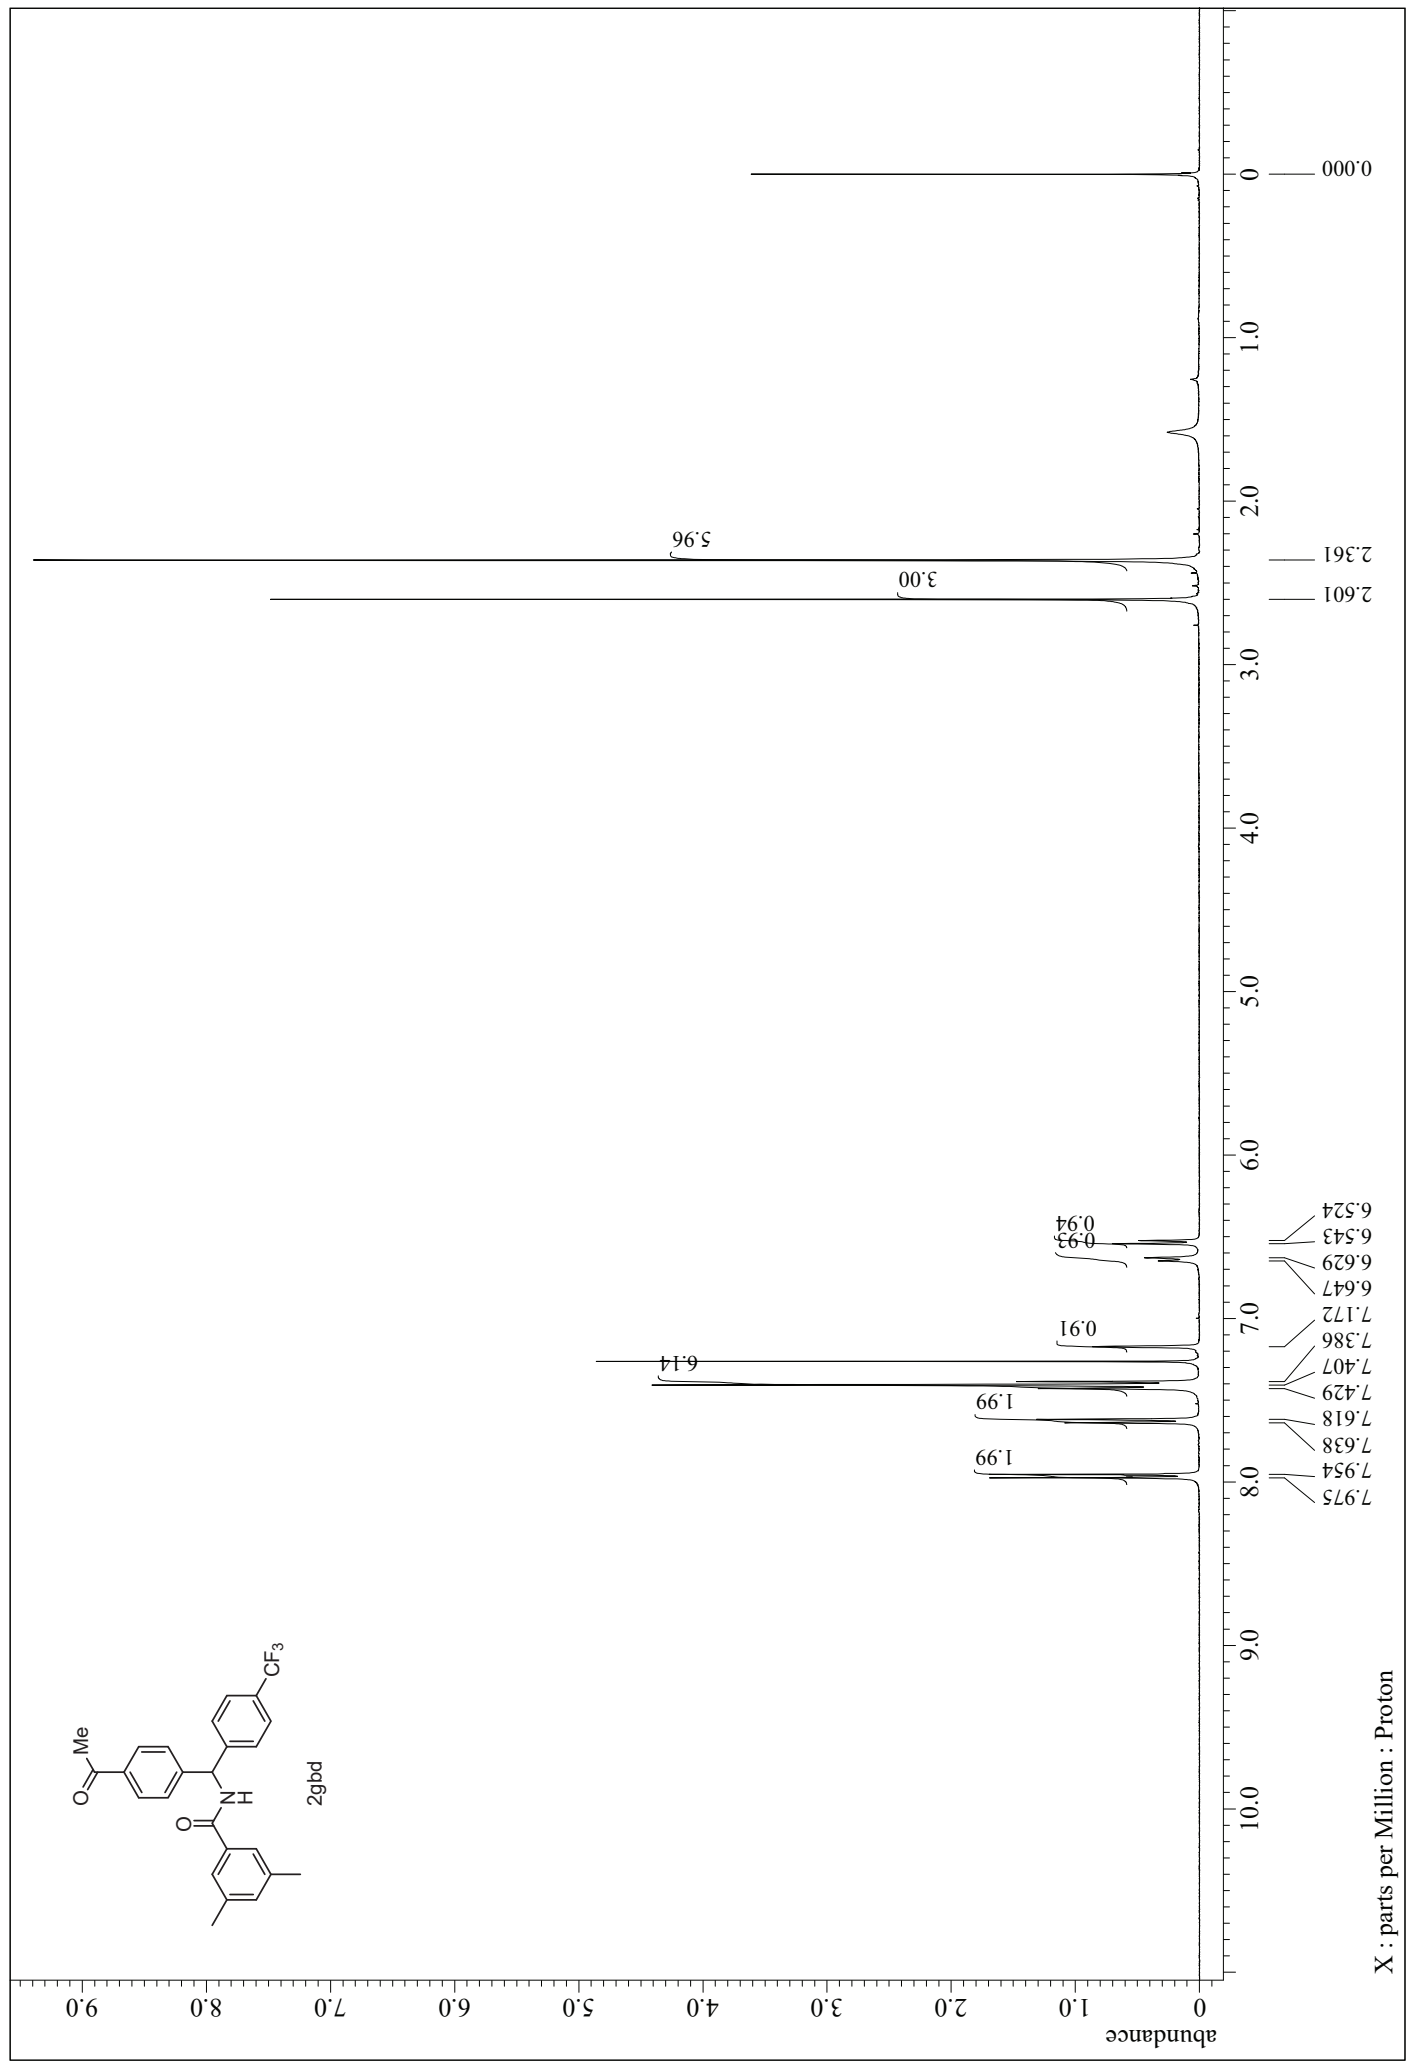

<sup>13</sup>C NMR (101 MHz, CDCl<sub>3</sub>)

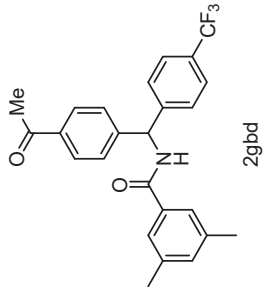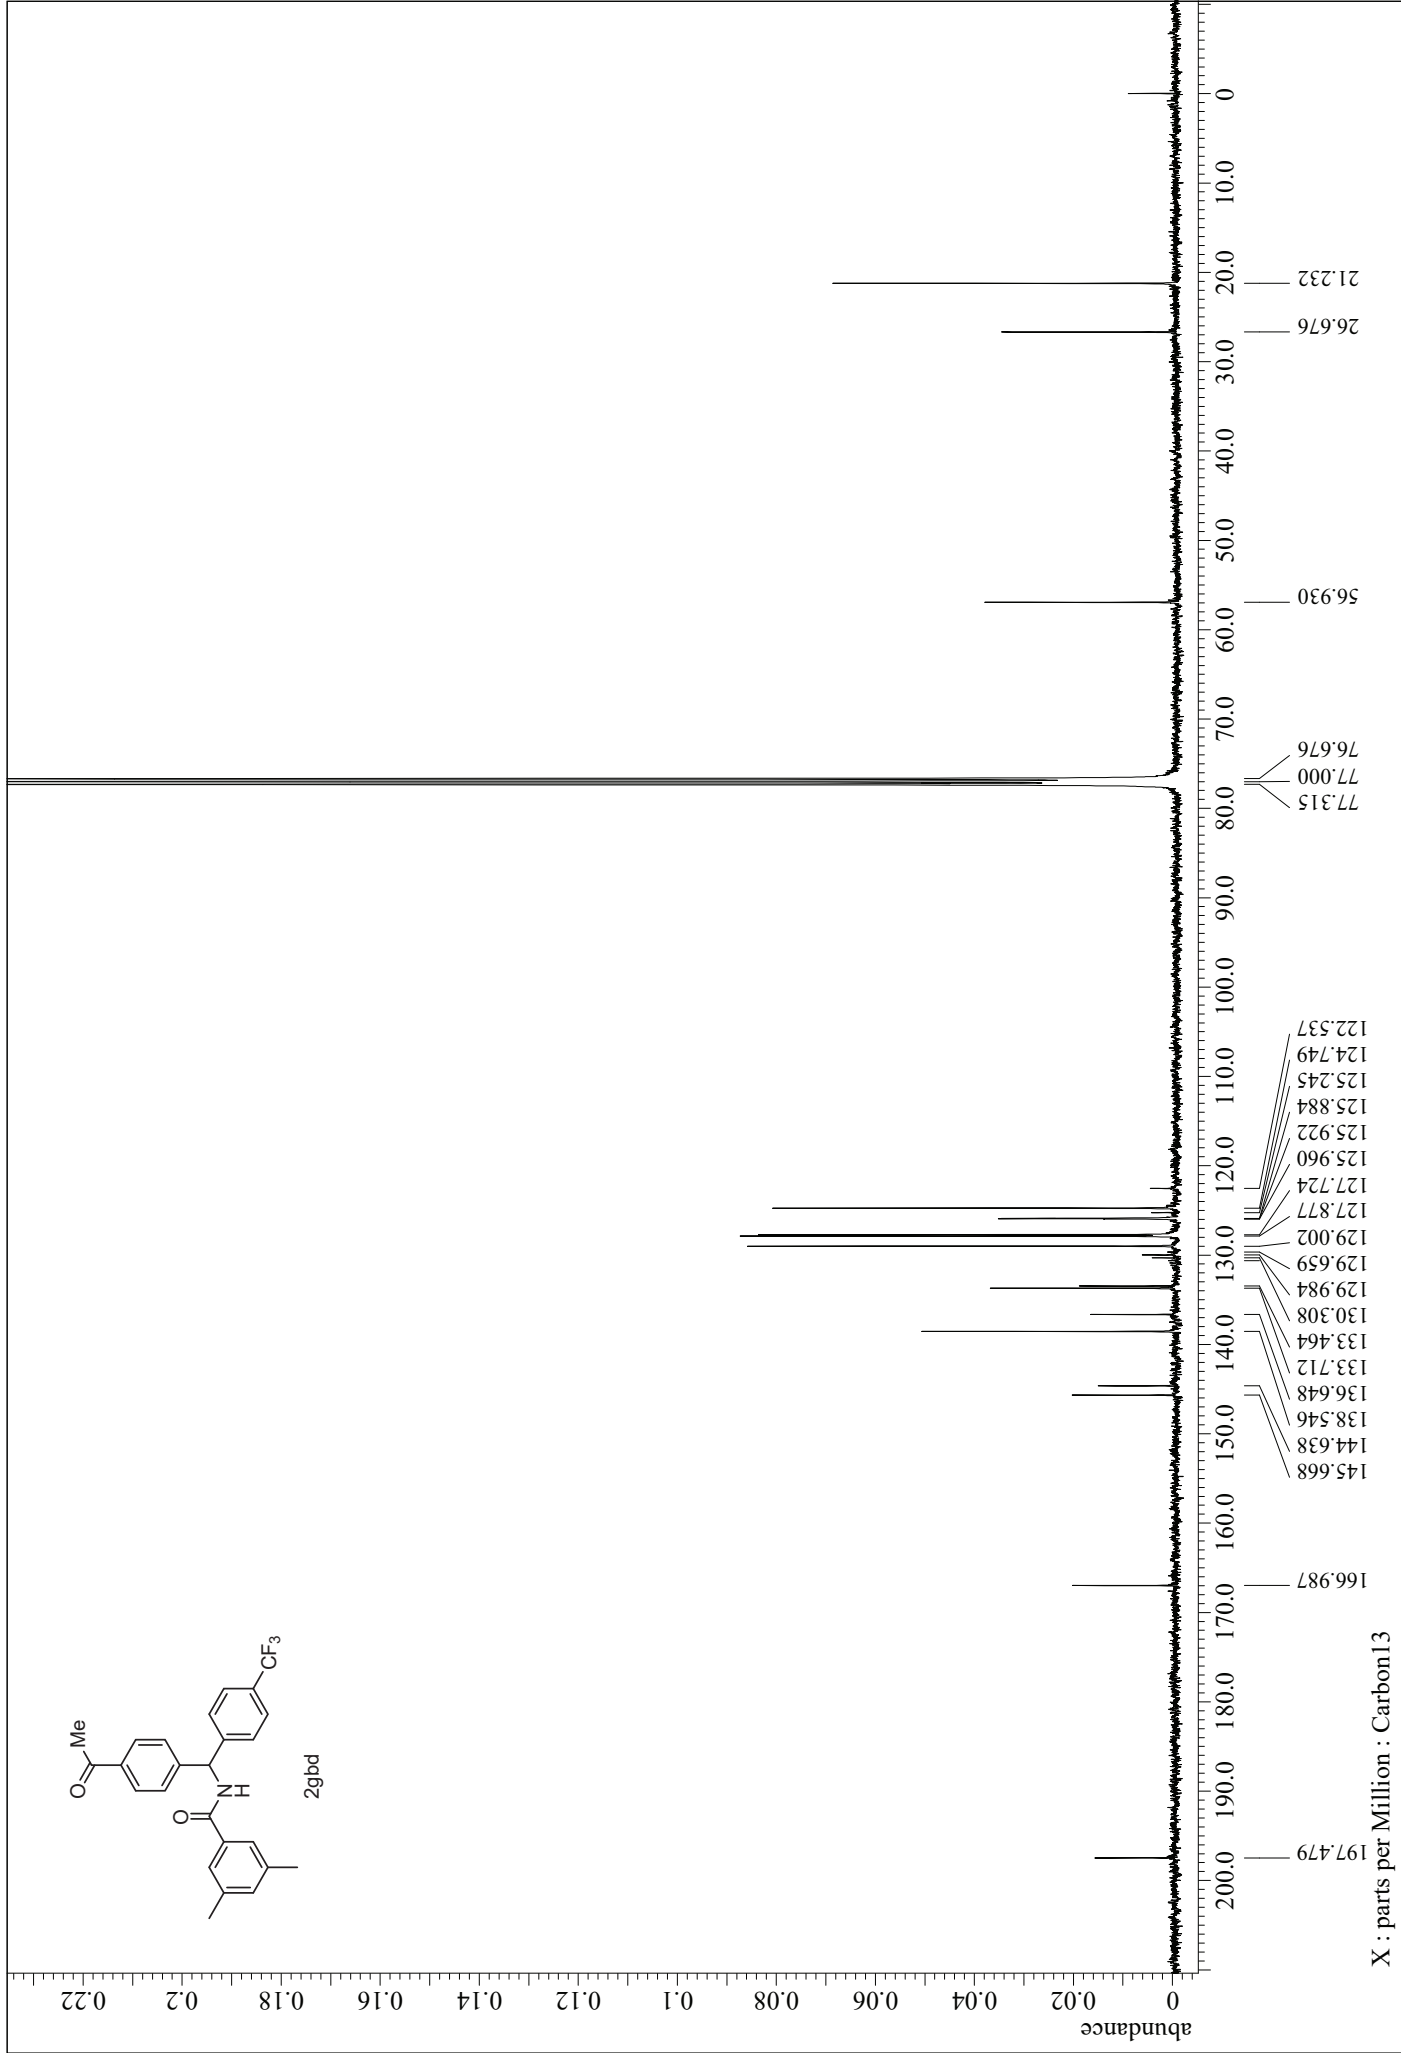

$^{19}\text{F}$  NMR (376 MHz,  $\text{CDCl}_3$ )

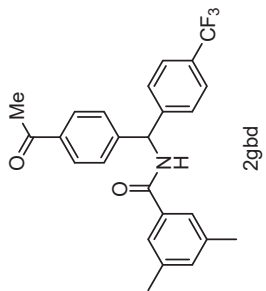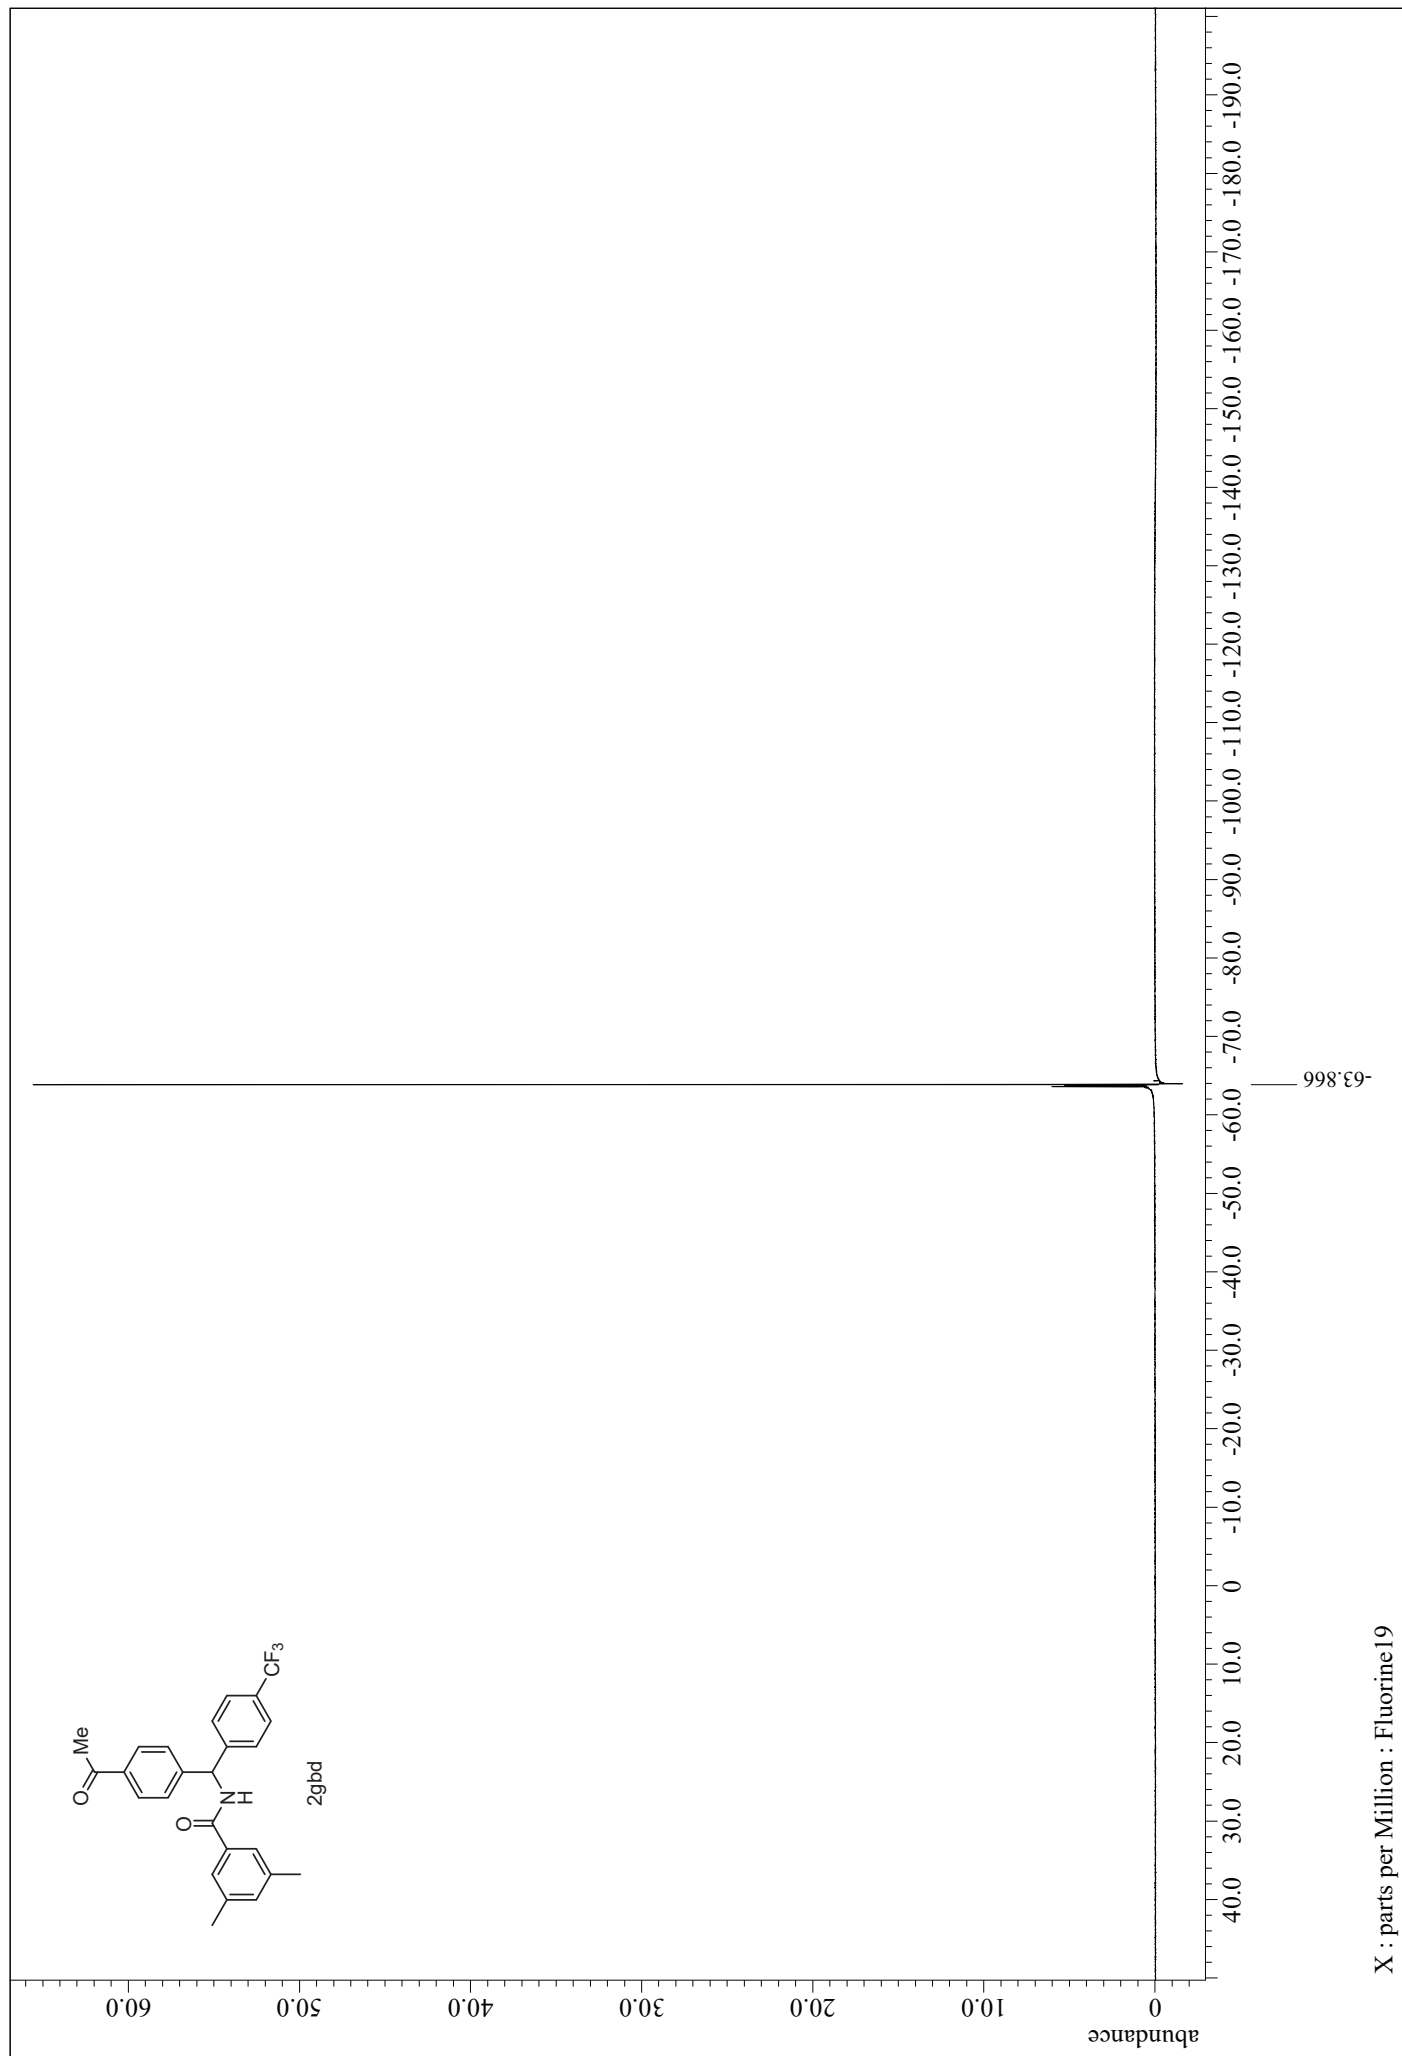

X : parts per Million : Fluorine 19

<sup>1</sup>H NMR (400 MHz, CDCl<sub>3</sub>)

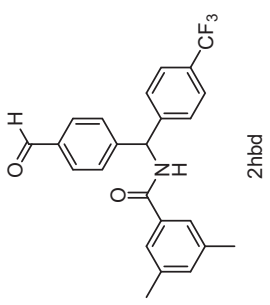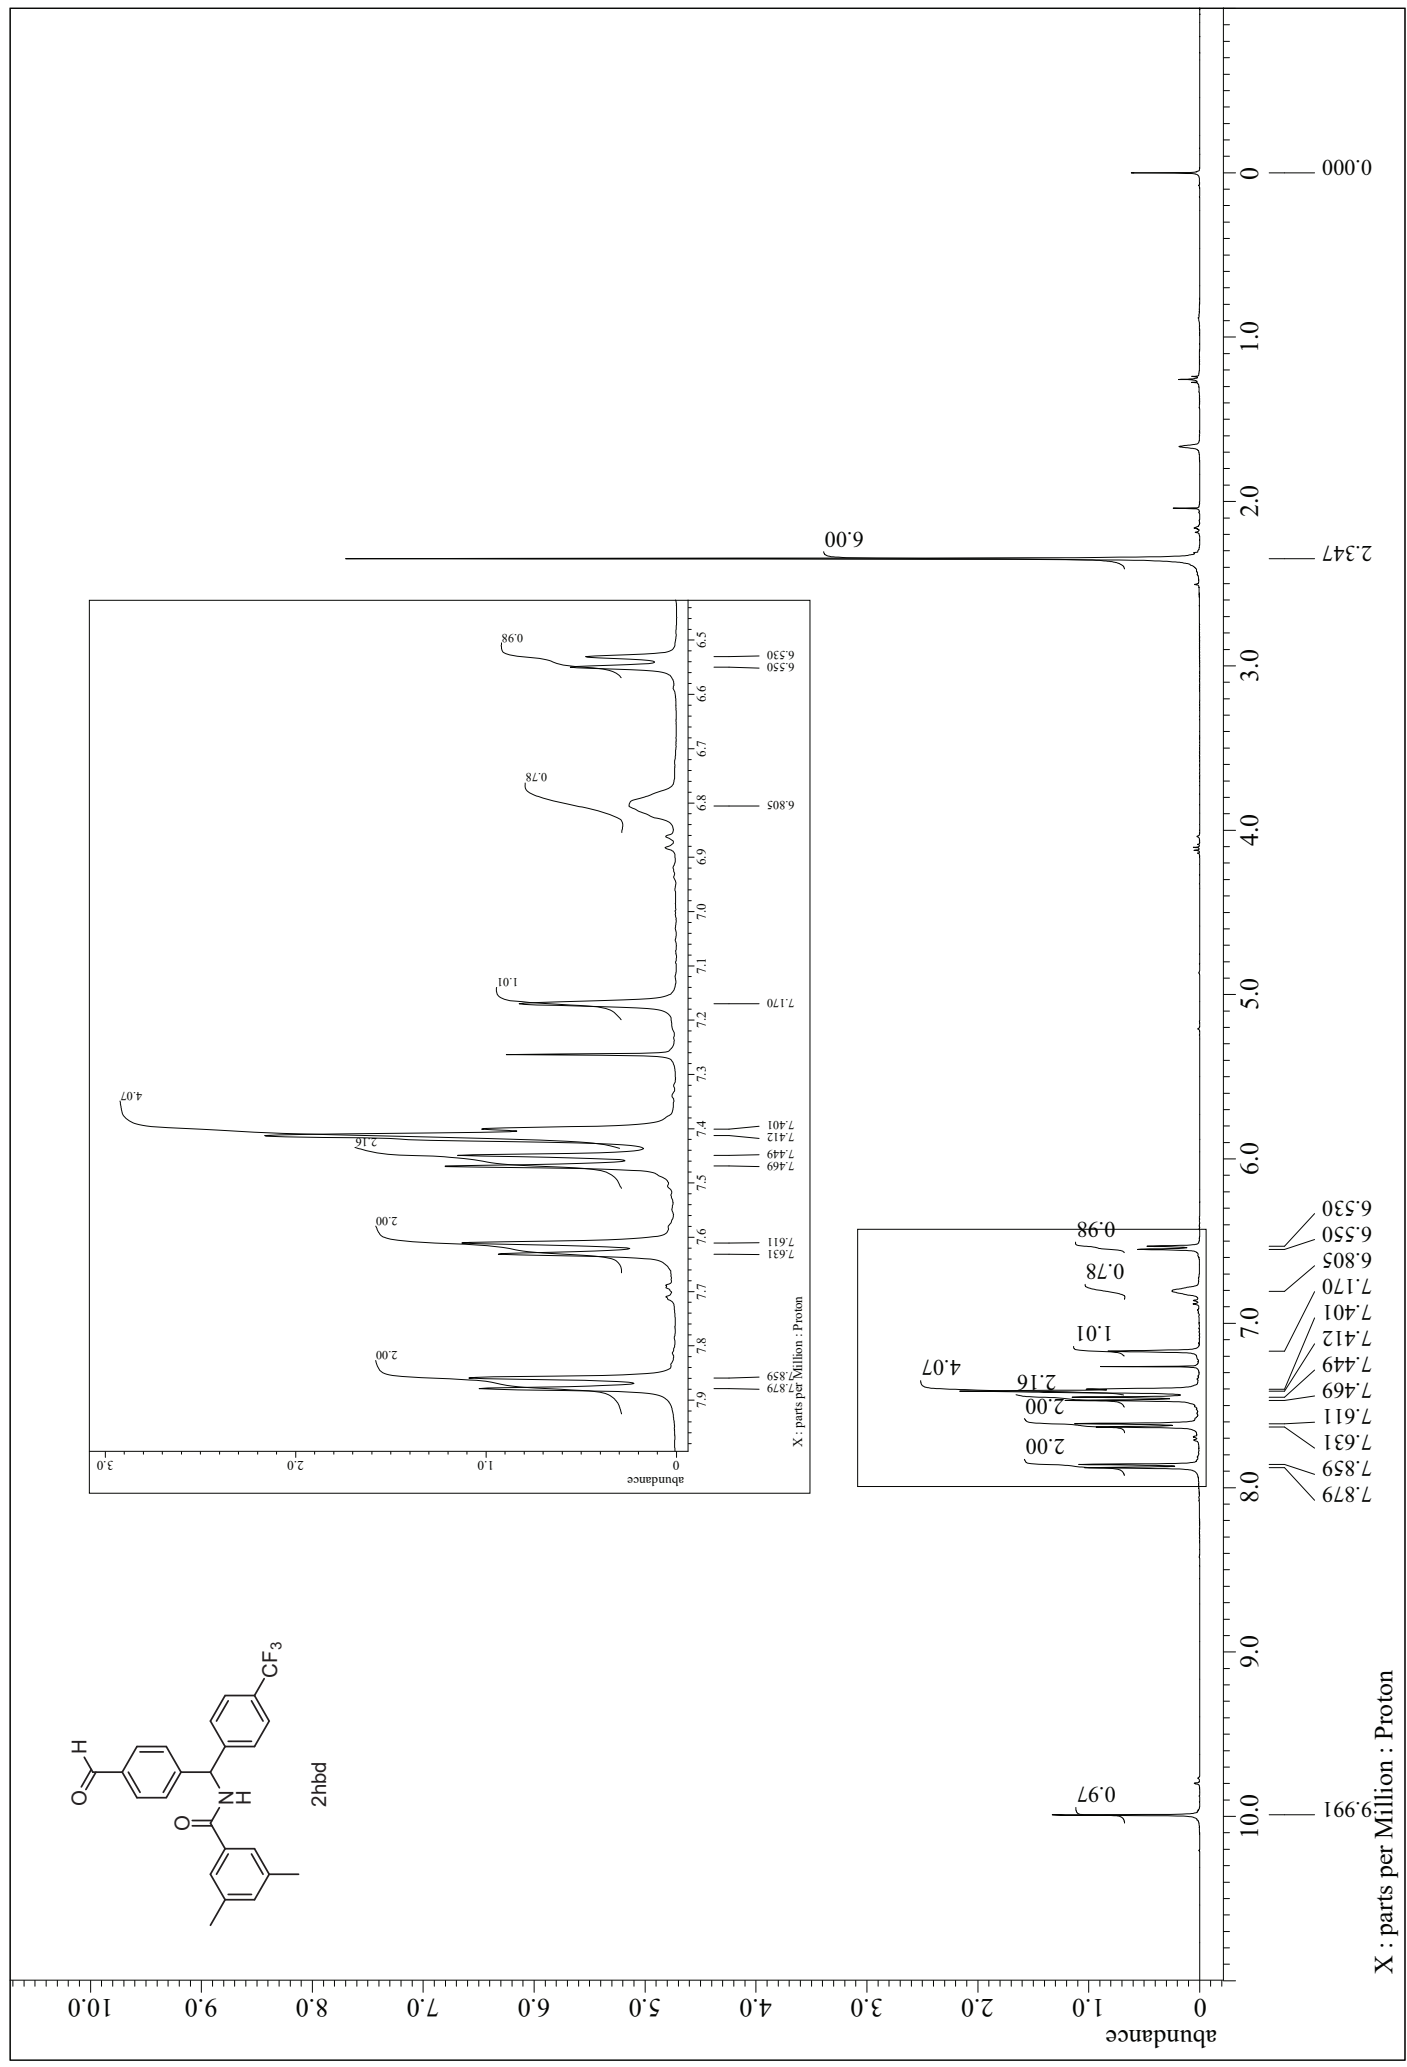

<sup>13</sup>C NMR (101 MHz, CDCl<sub>3</sub>)

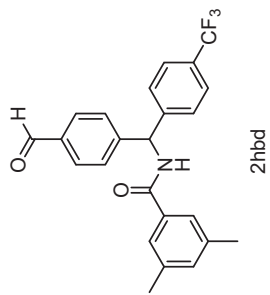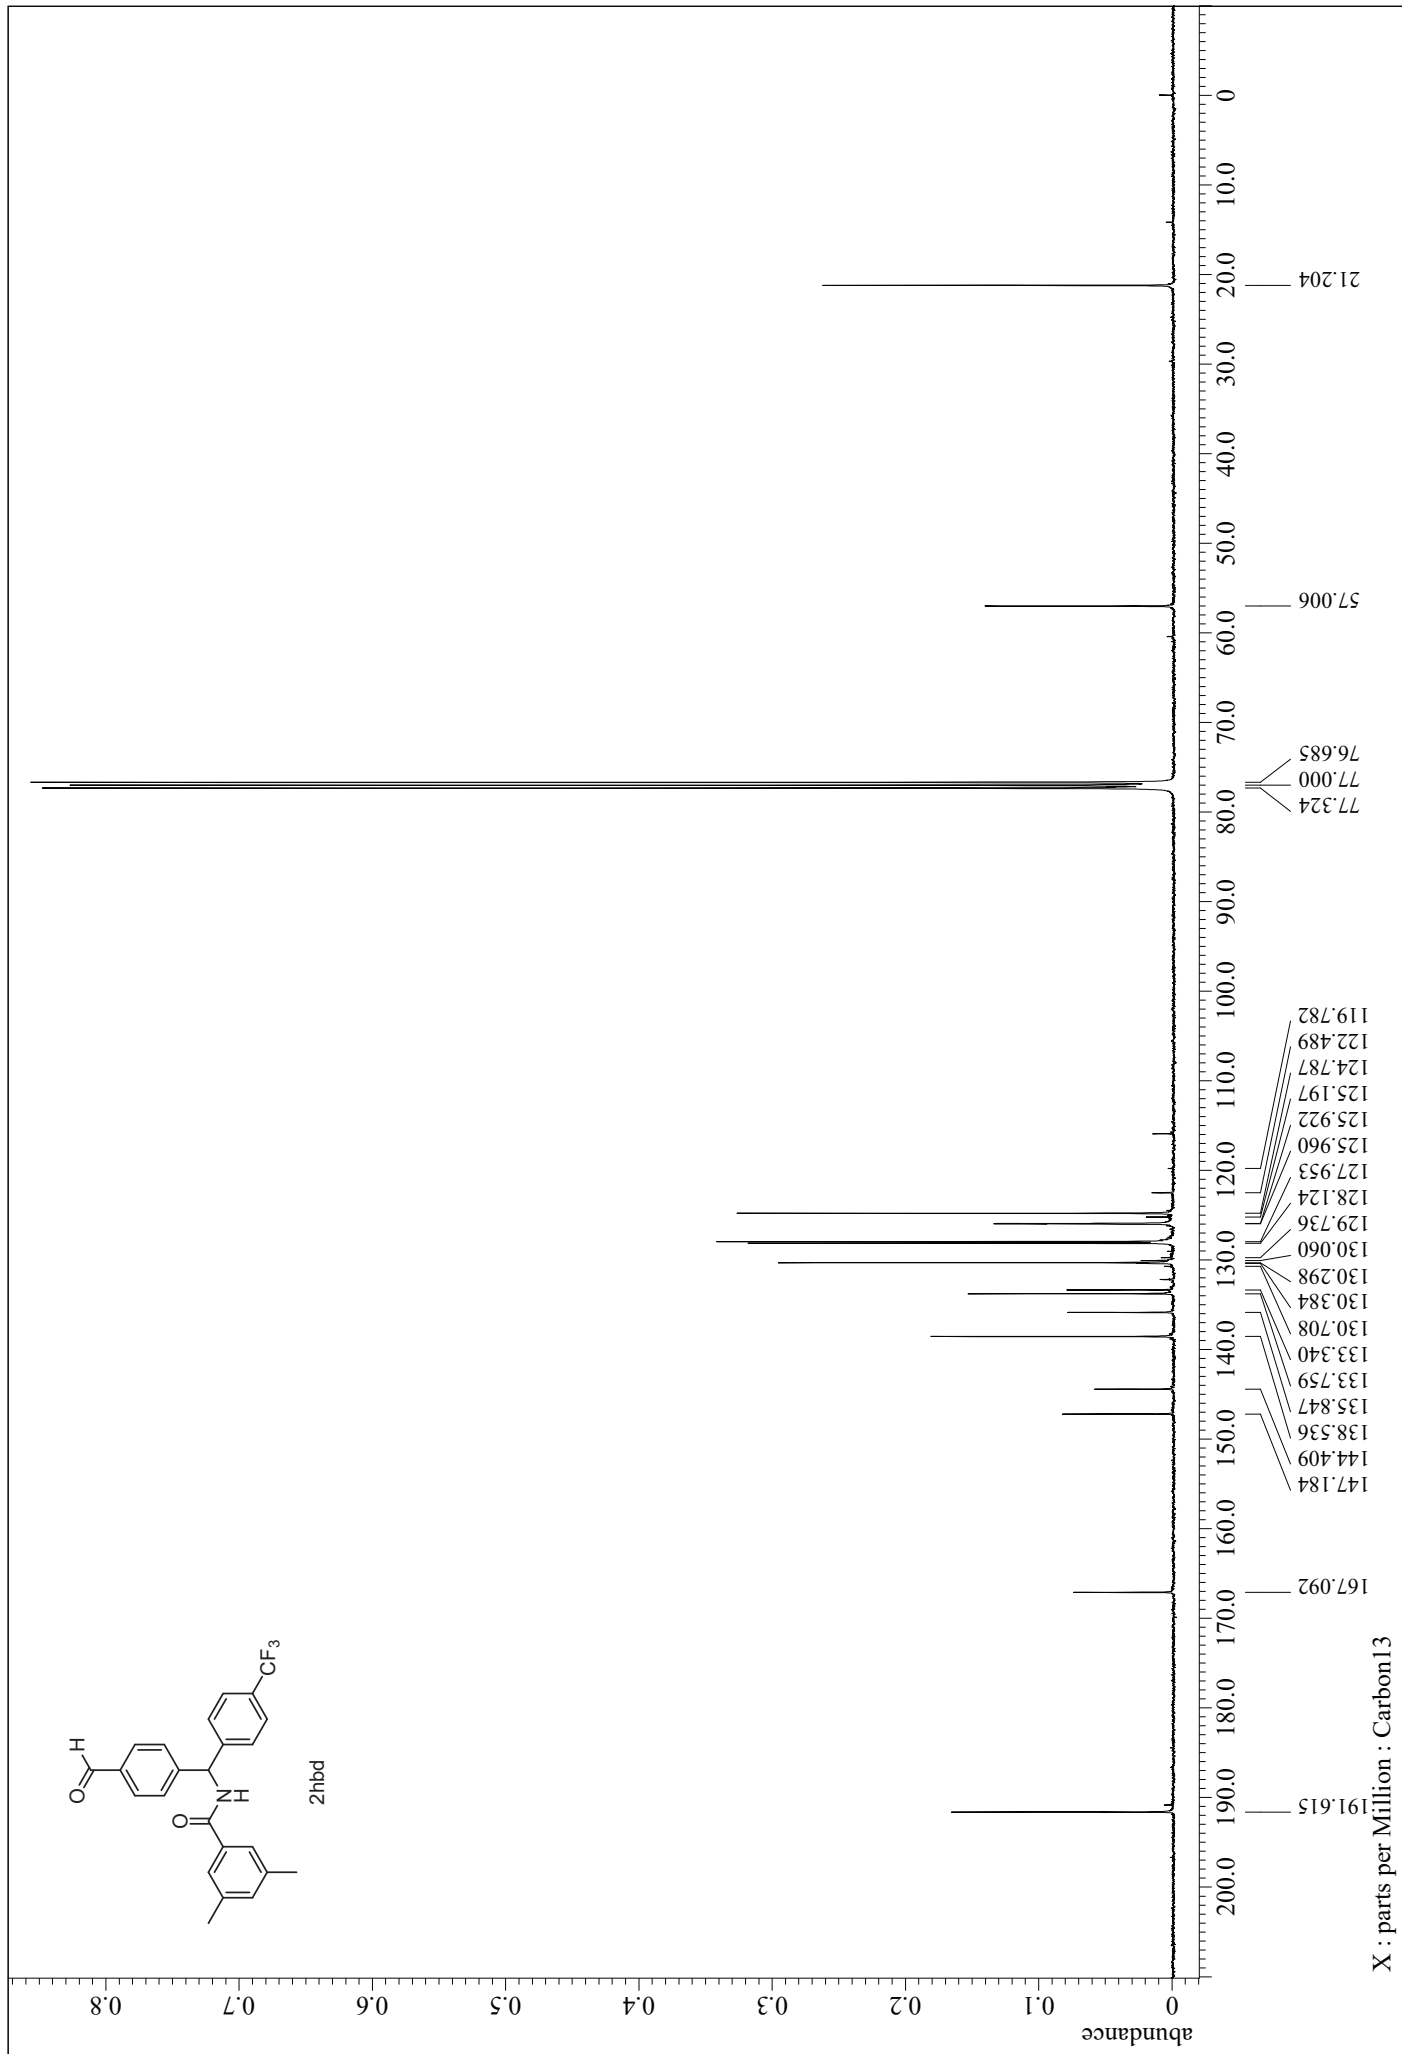



<sup>19</sup>F NMR (376 MHz, CDCl<sub>3</sub>)

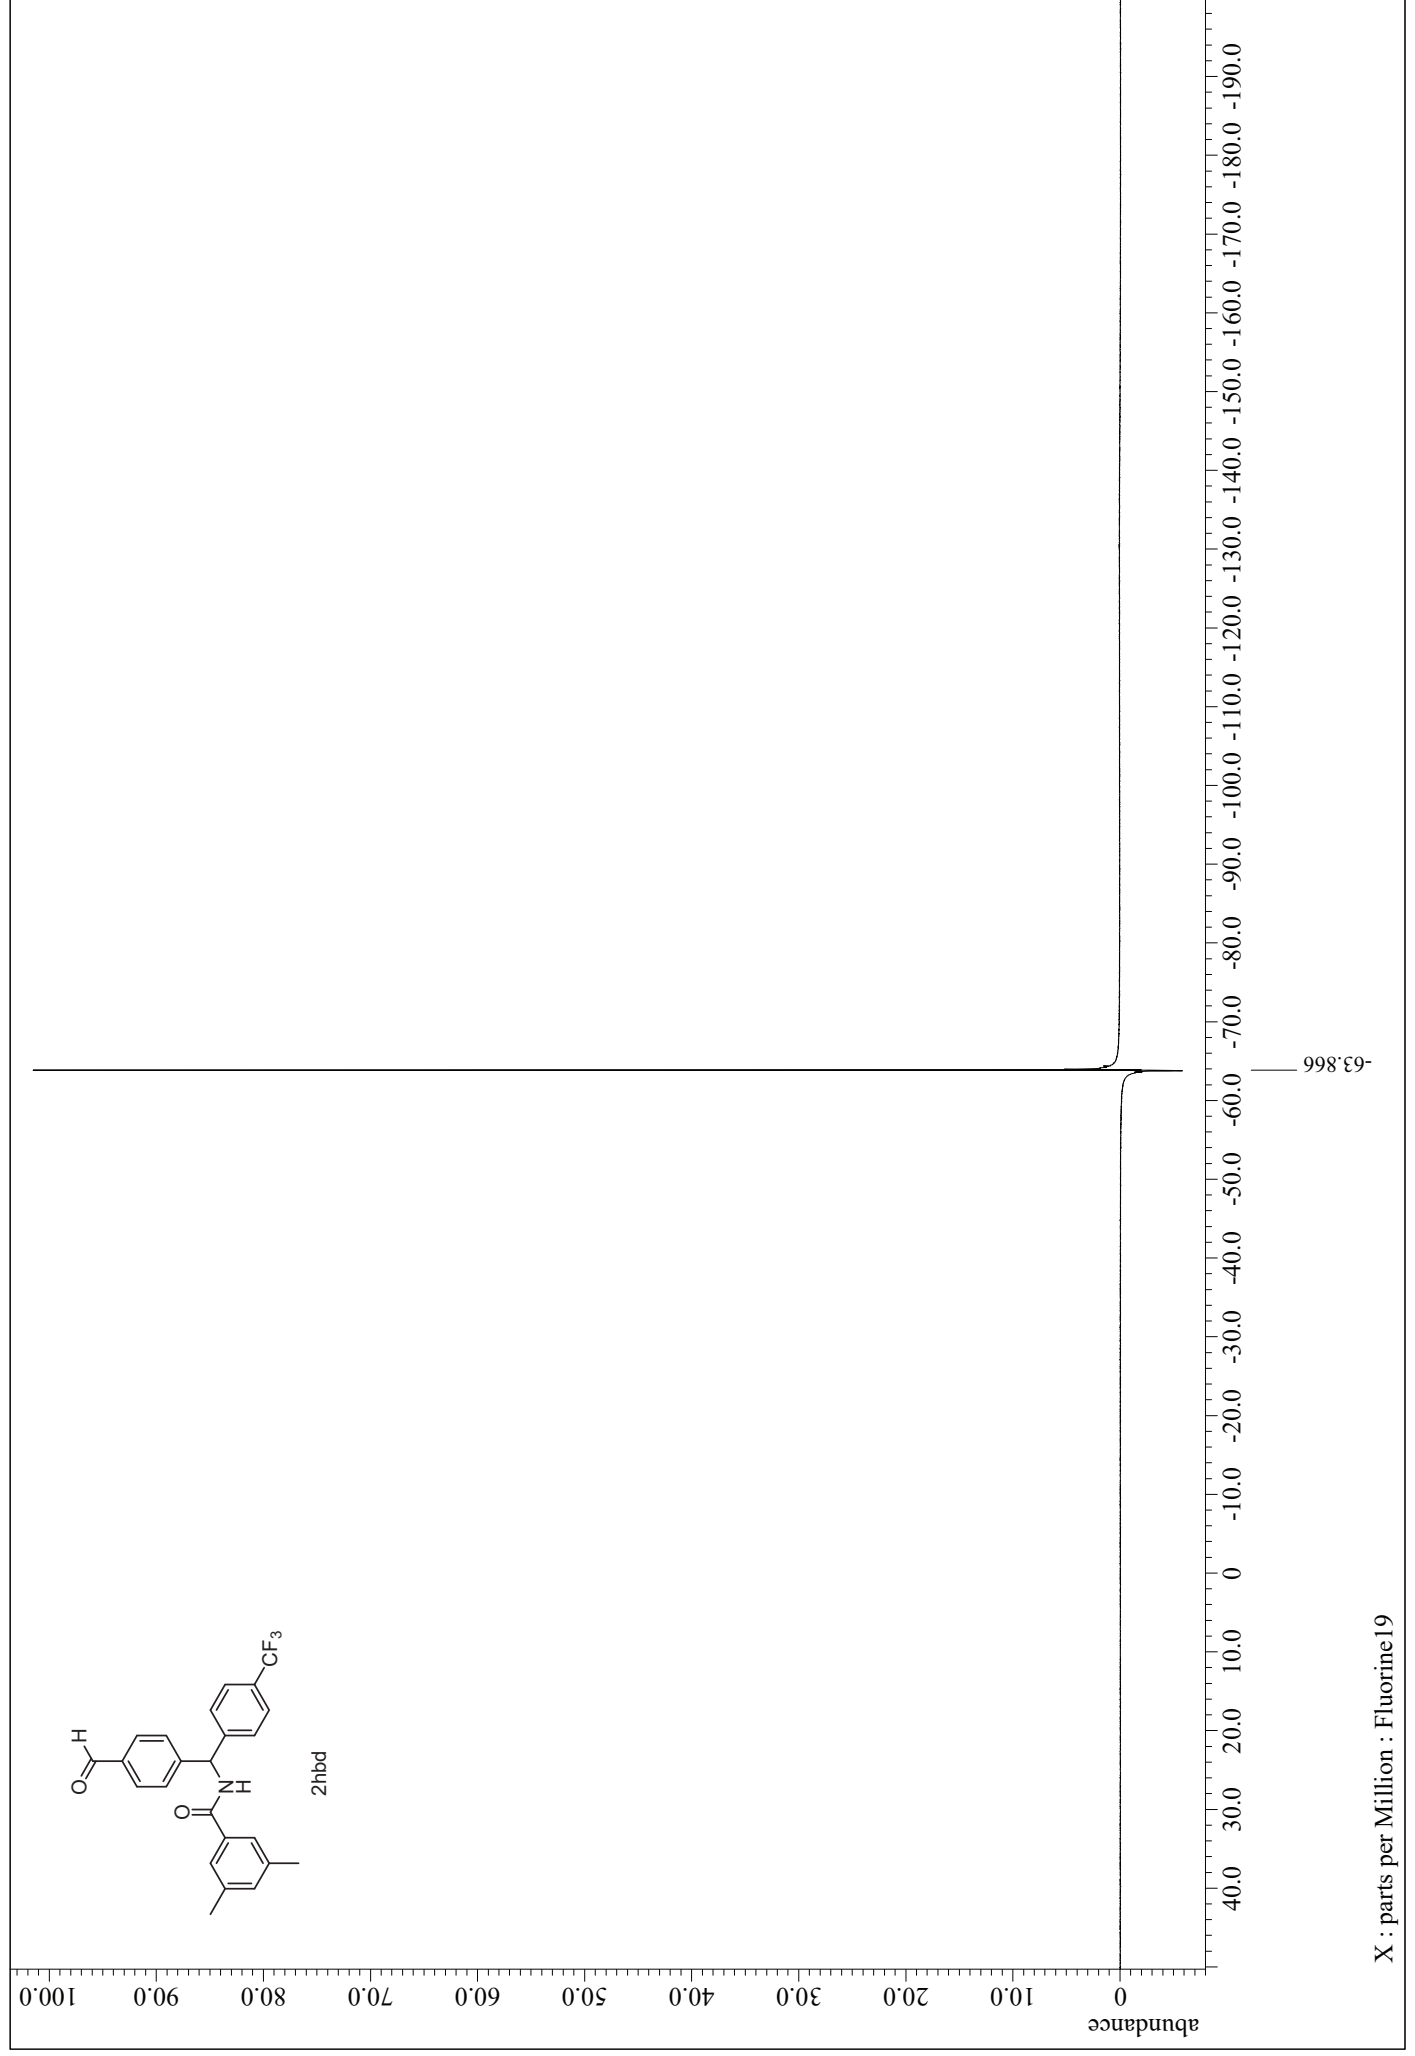

X : parts per Million : Fluorine 19

<sup>1</sup>H NMR (400 MHz, CDCl<sub>3</sub>)

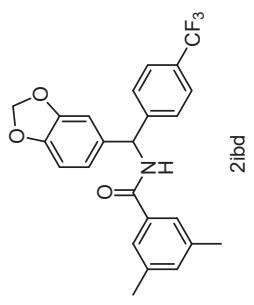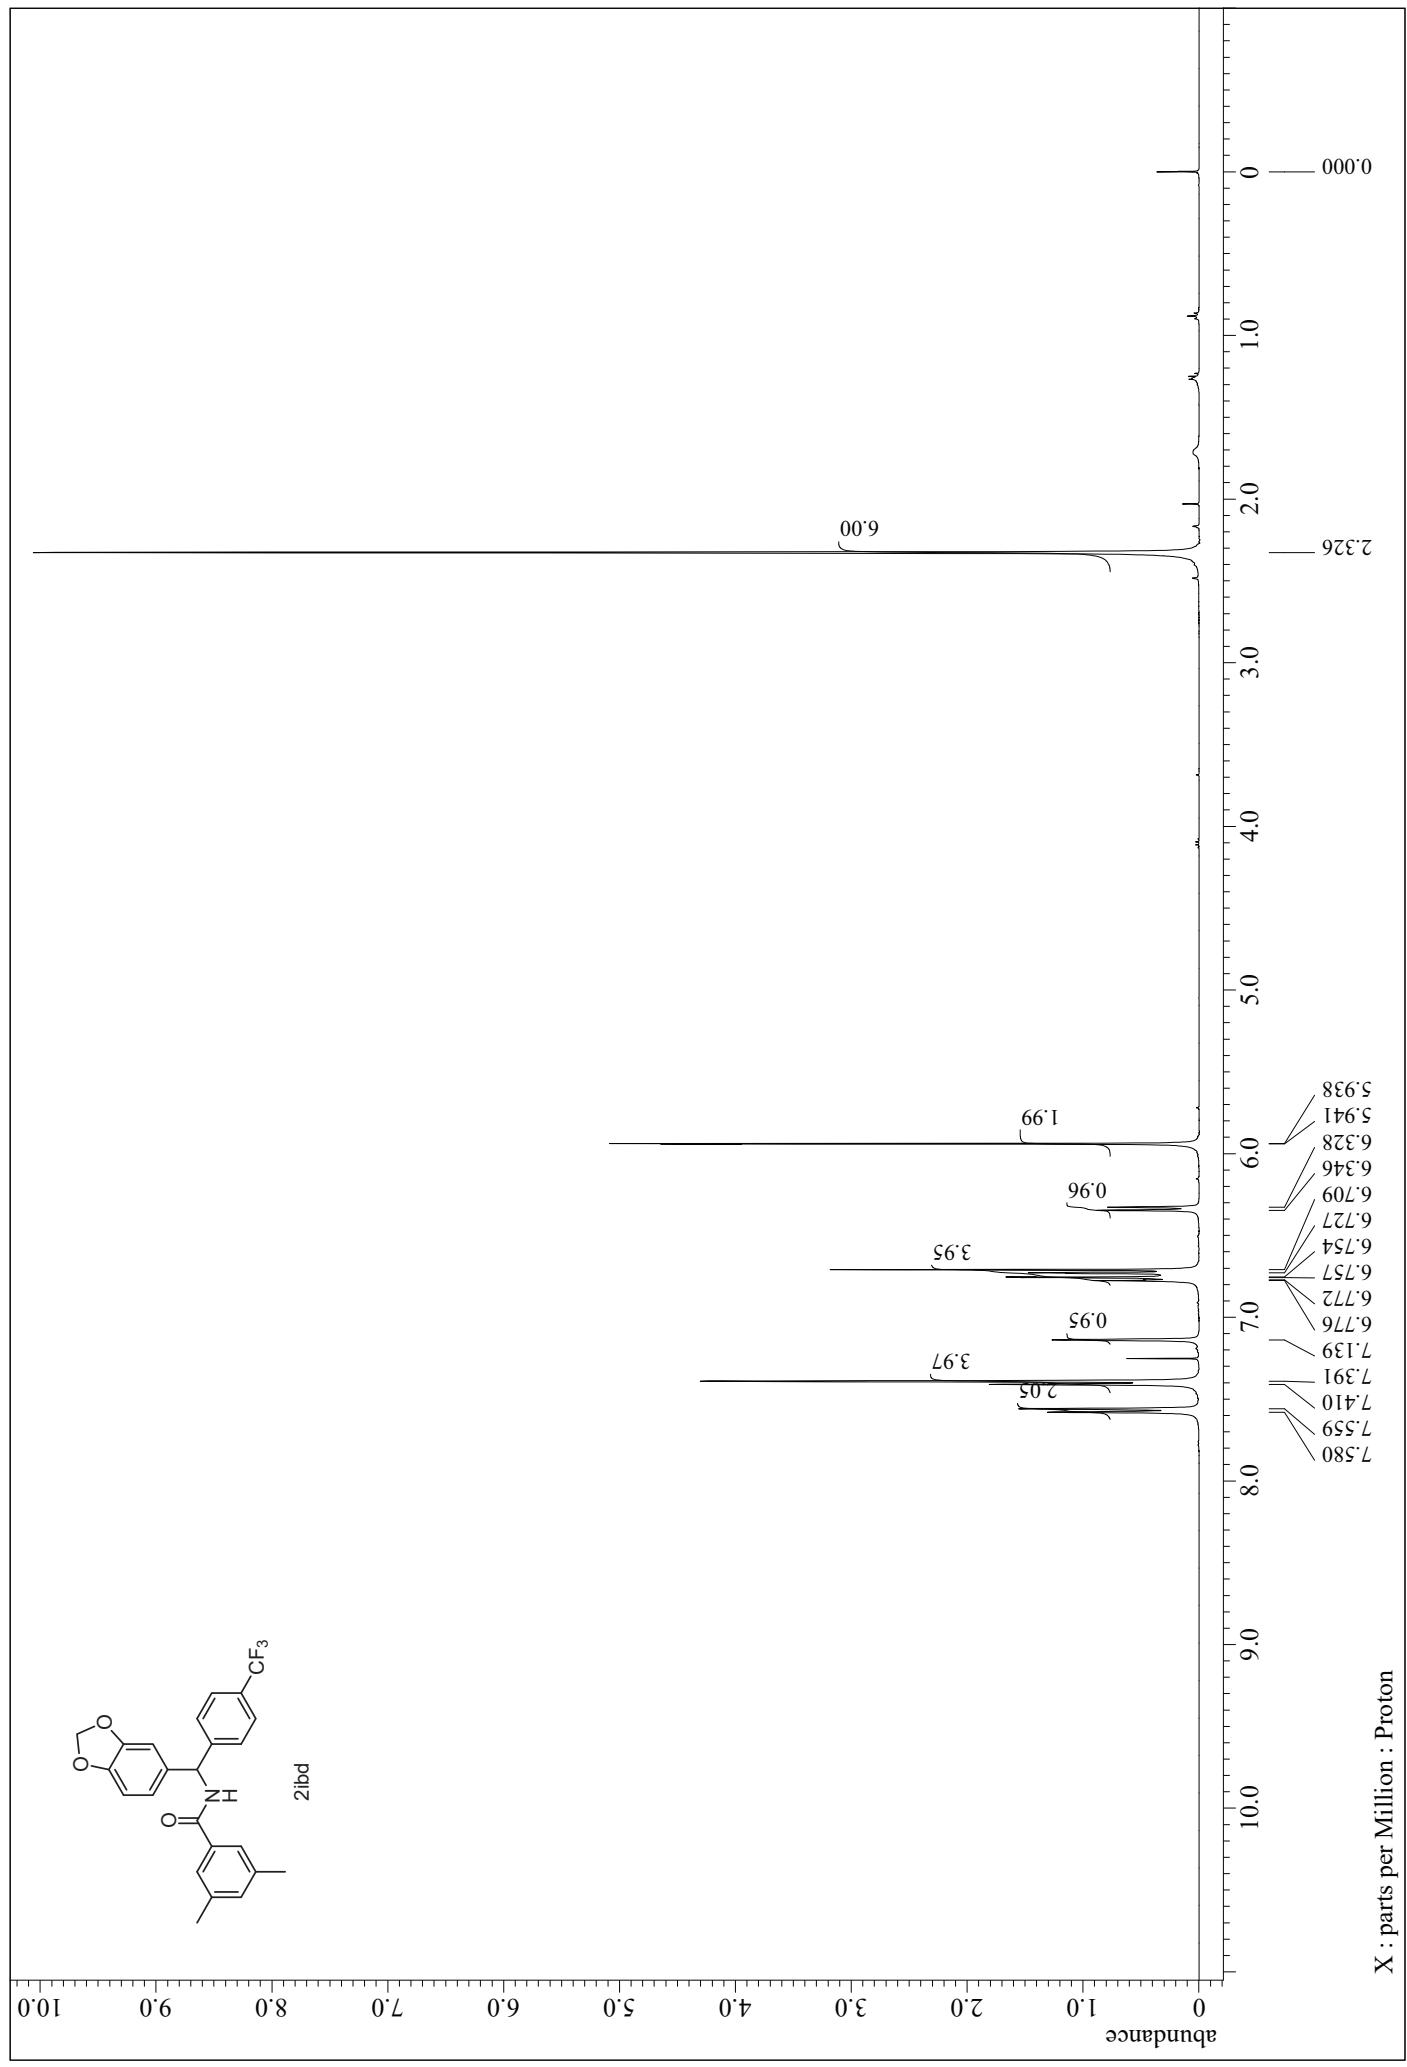

<sup>13</sup>C NMR (101 MHz, CDCl<sub>3</sub>)

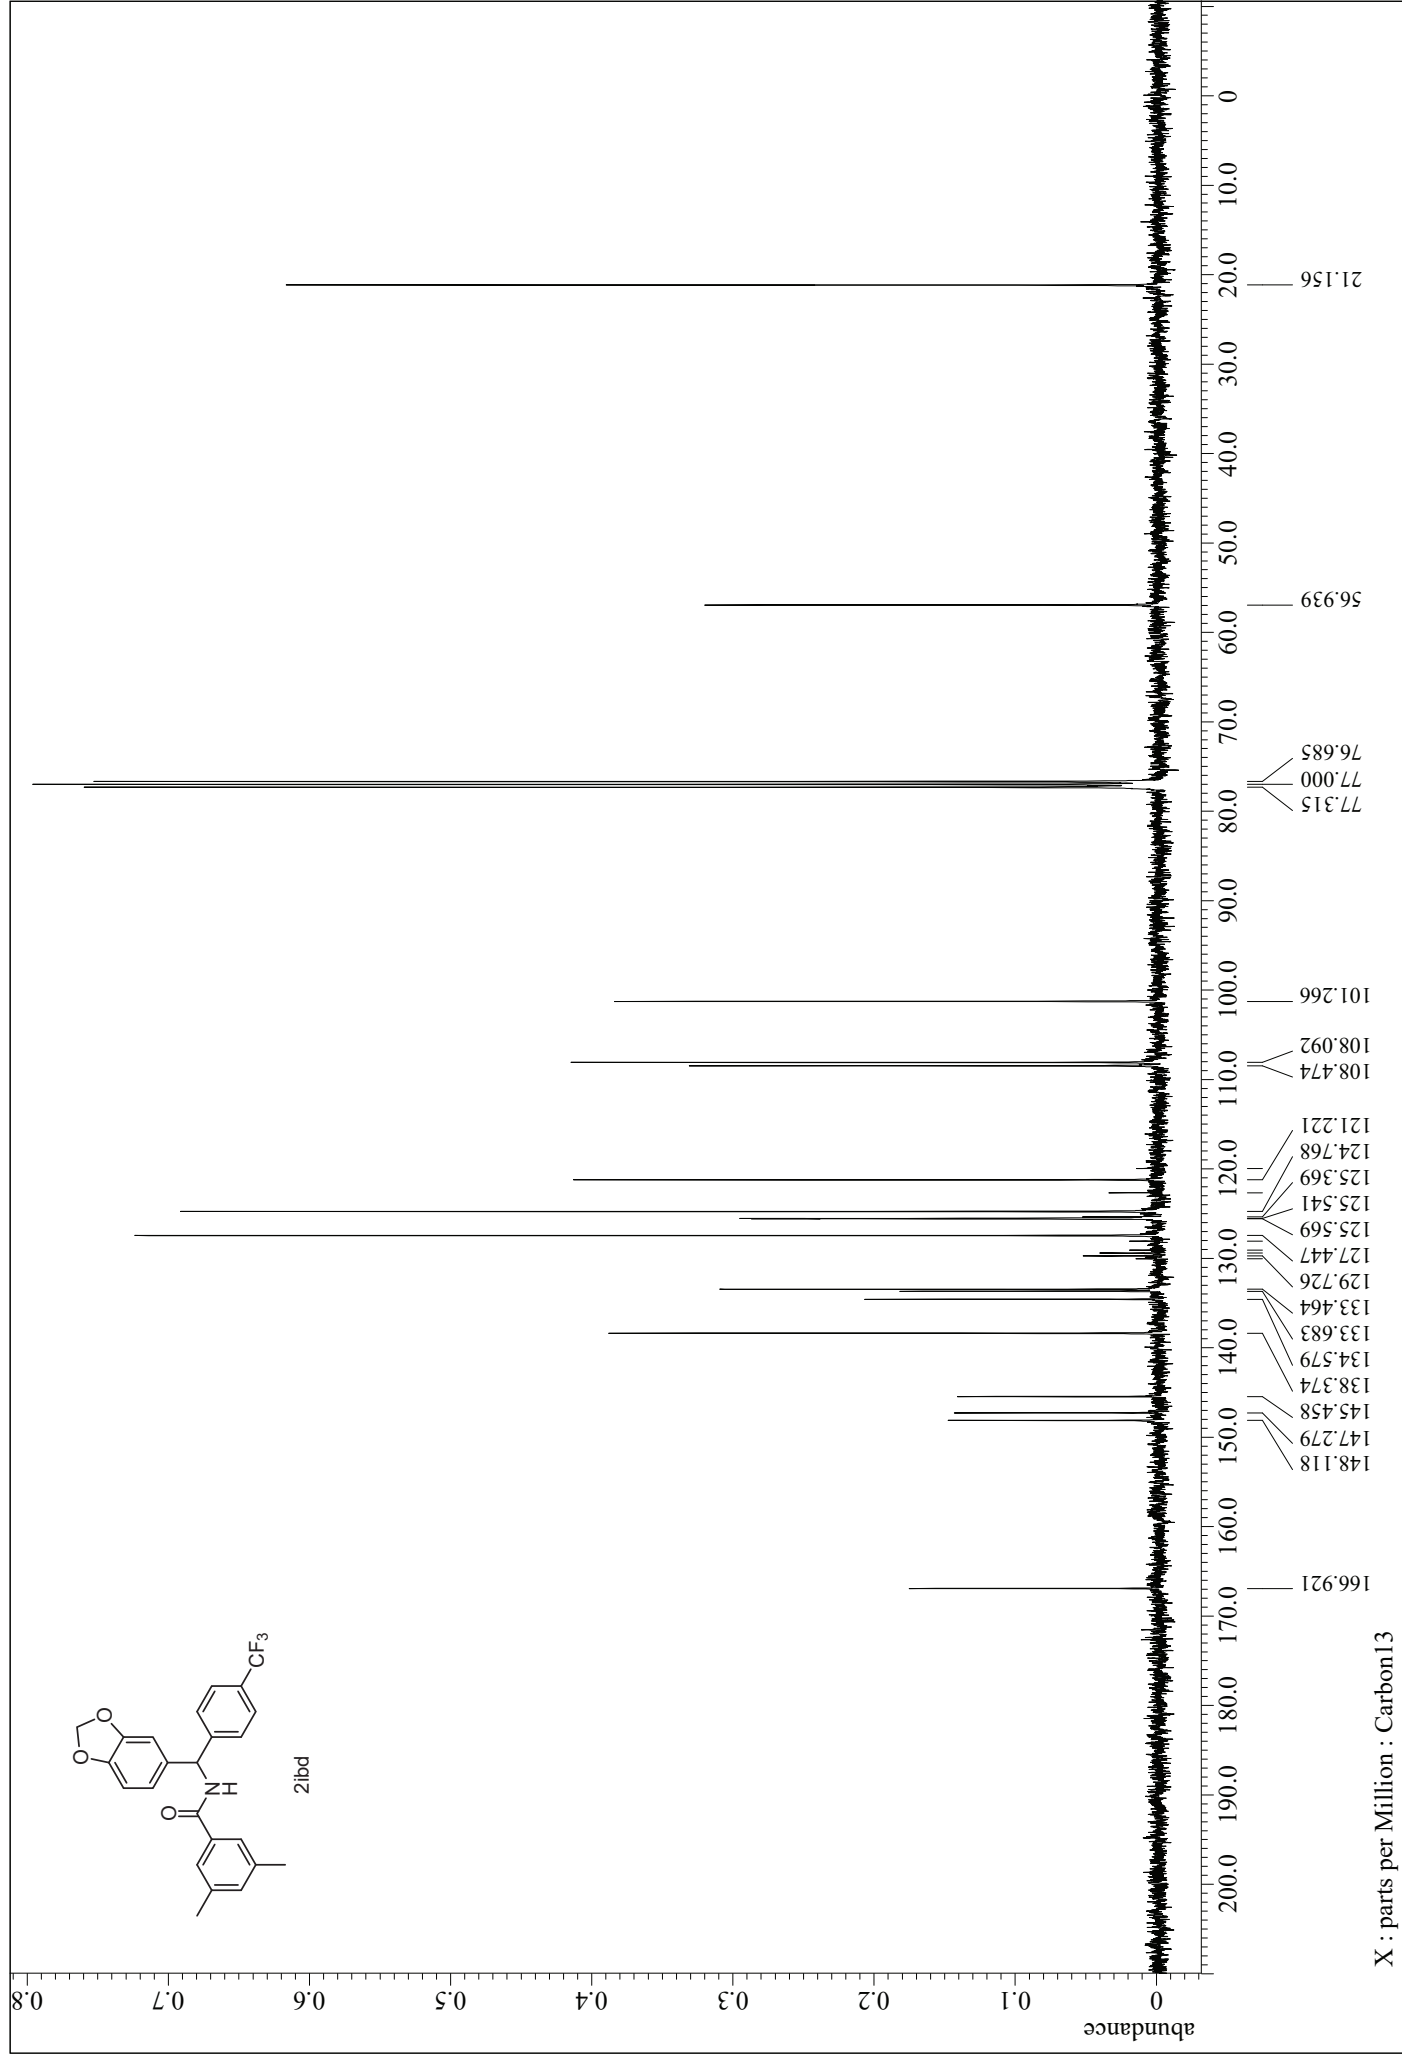

X : parts per Million : Carbon13

$^{19}\text{F}$  NMR (376 MHz,  $\text{CDCl}_3$ )

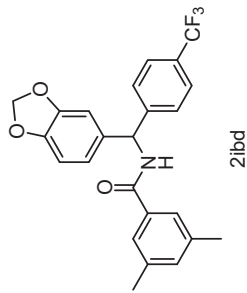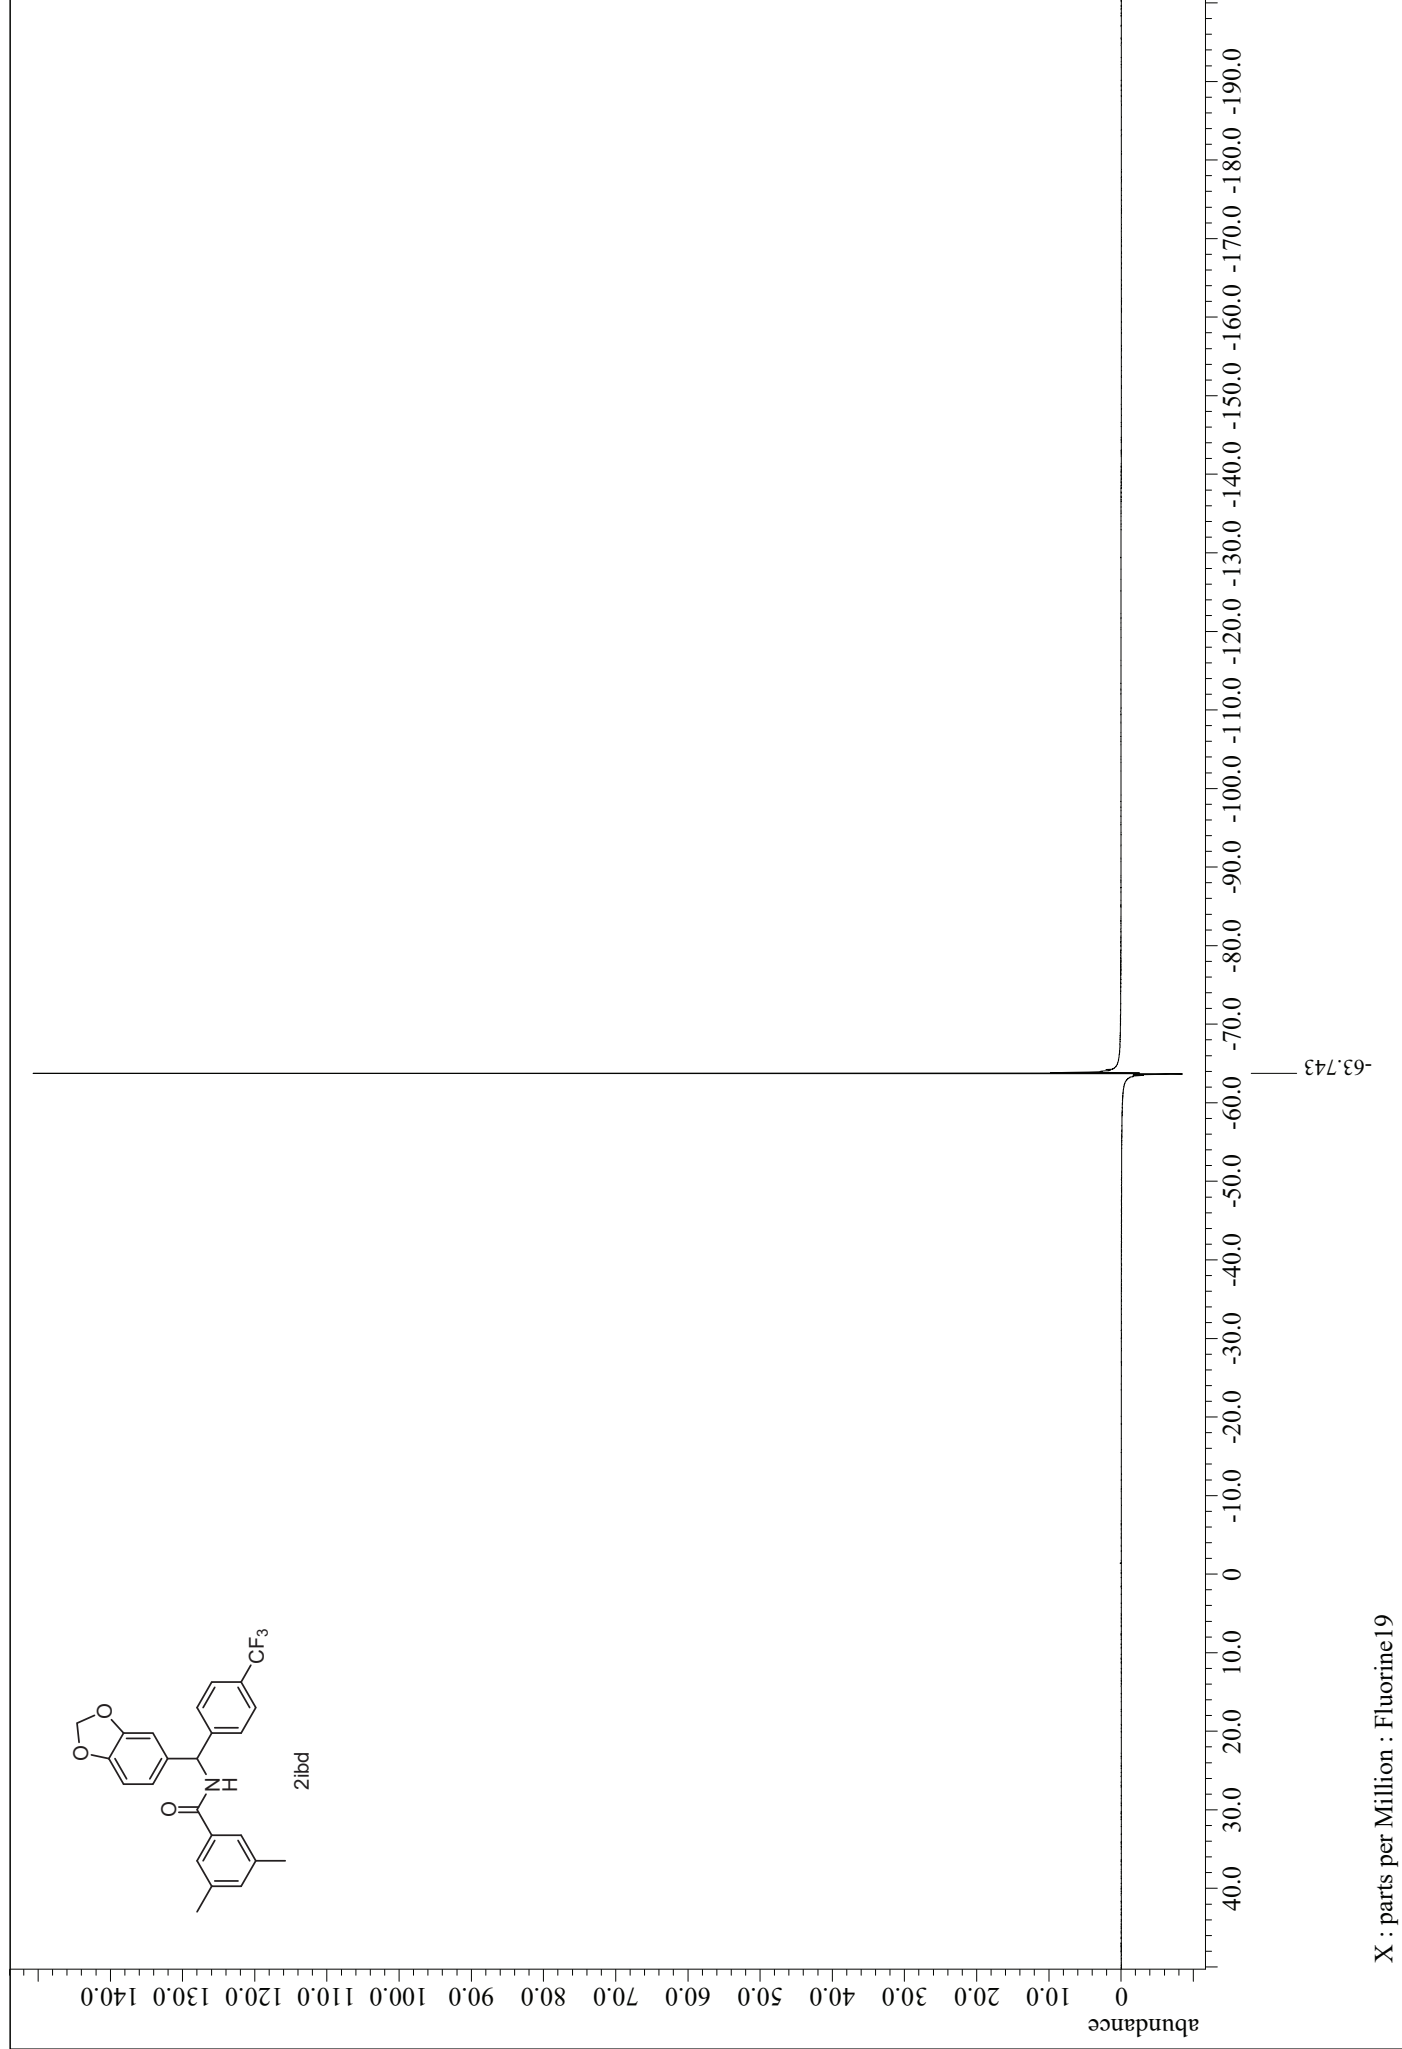

X : parts per Million : Fluorine 19

<sup>1</sup>H NMR (400 MHz, CDCl<sub>3</sub>)

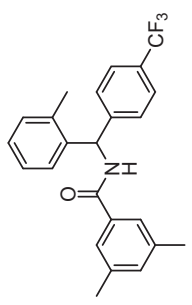

2|bd

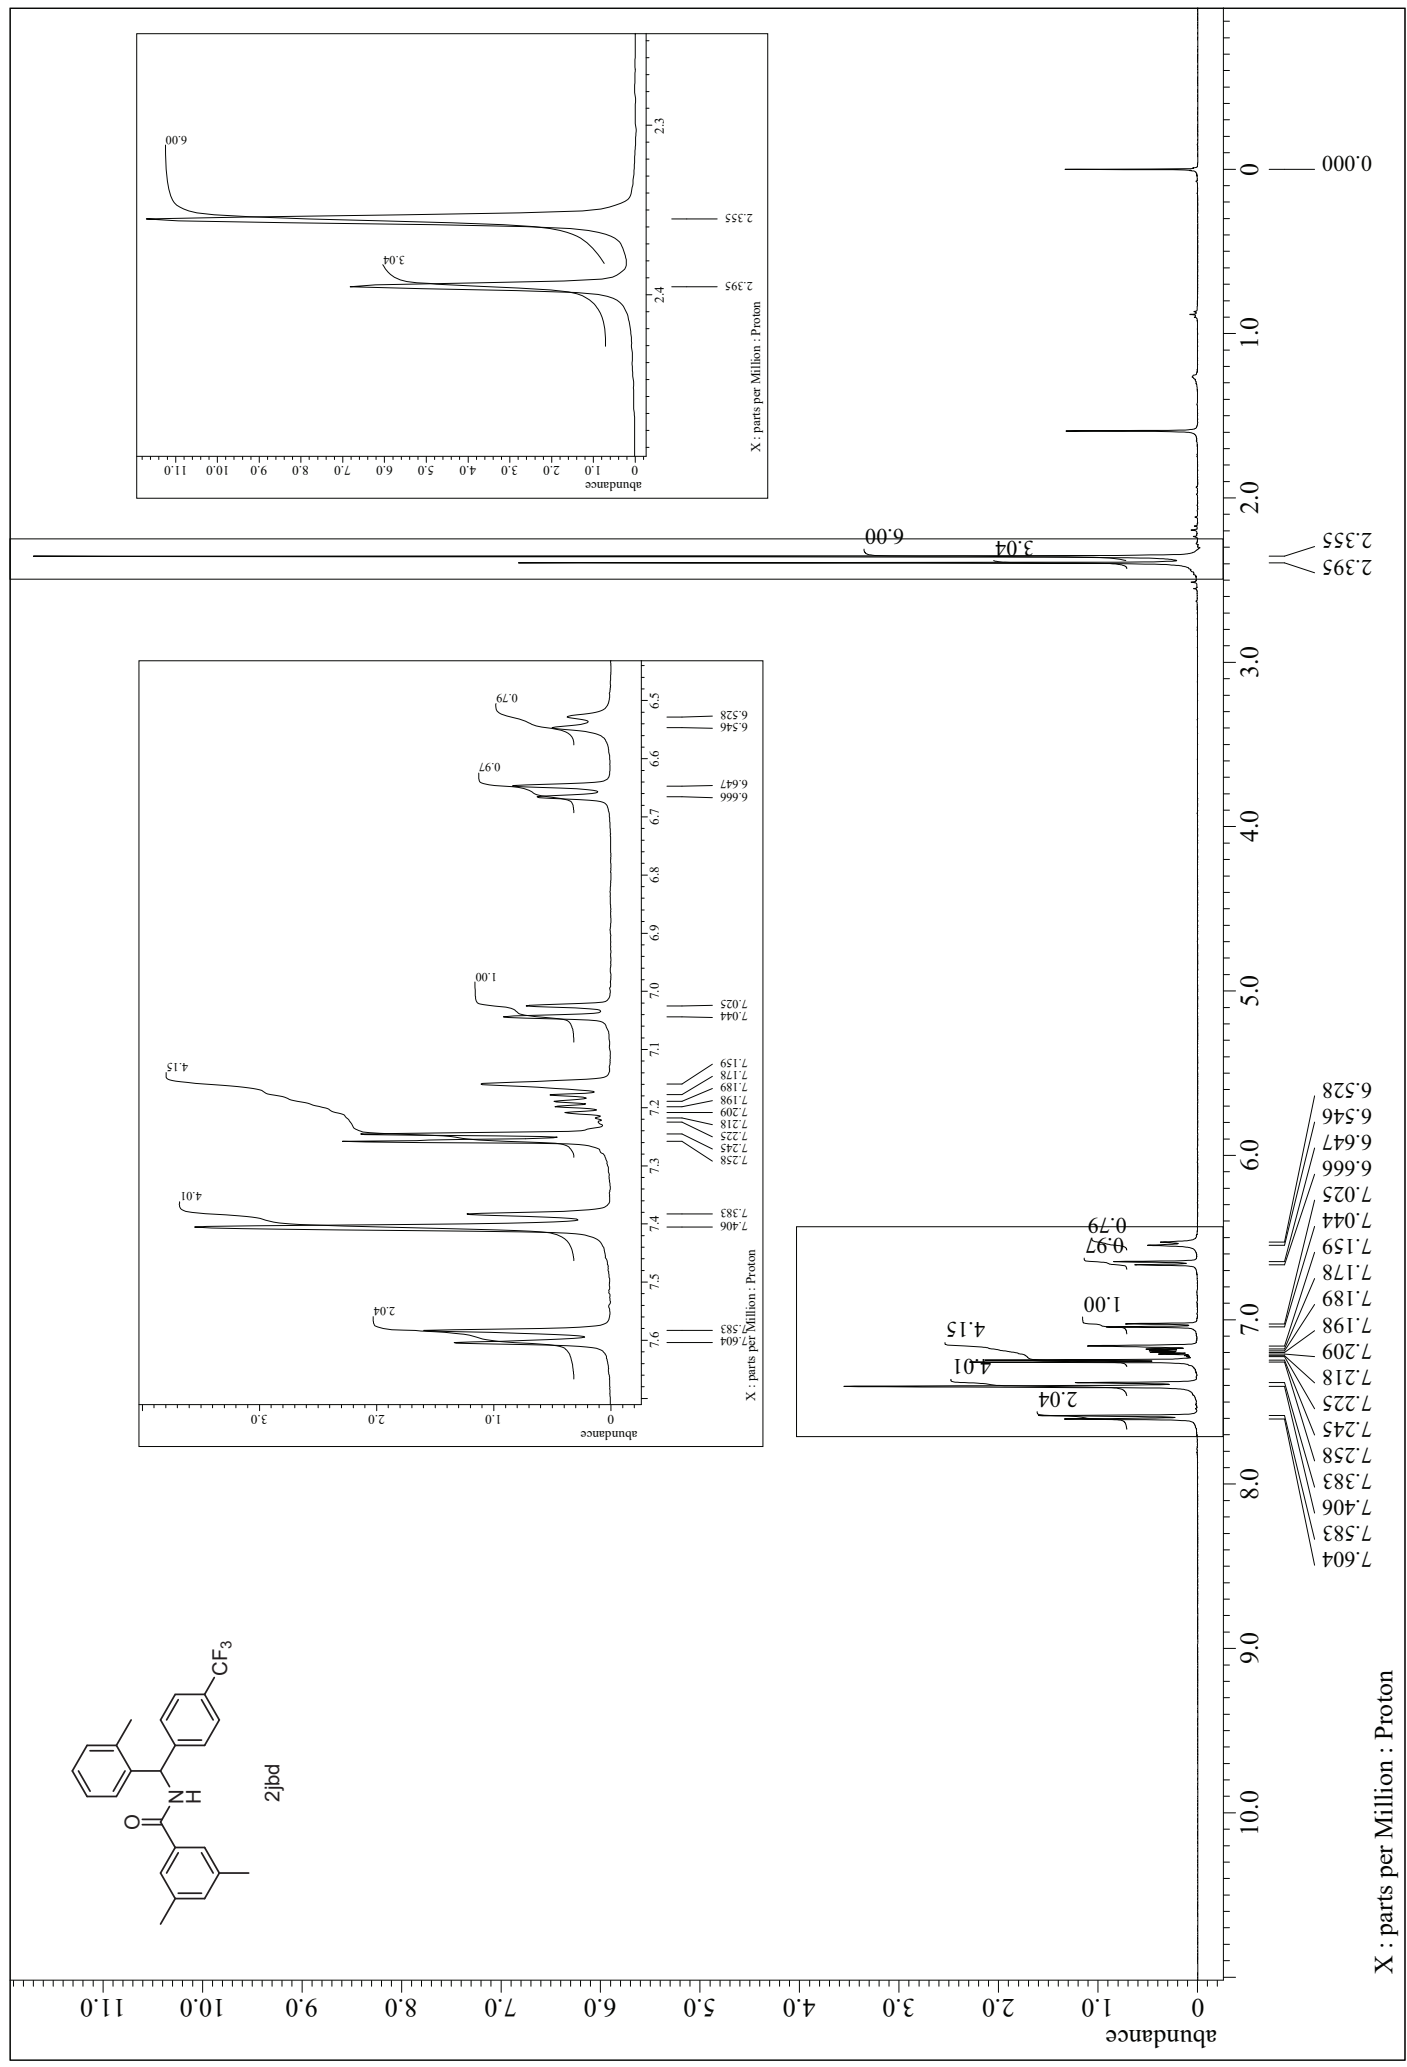

<sup>13</sup>C NMR (101 MHz, CDCl<sub>3</sub>)

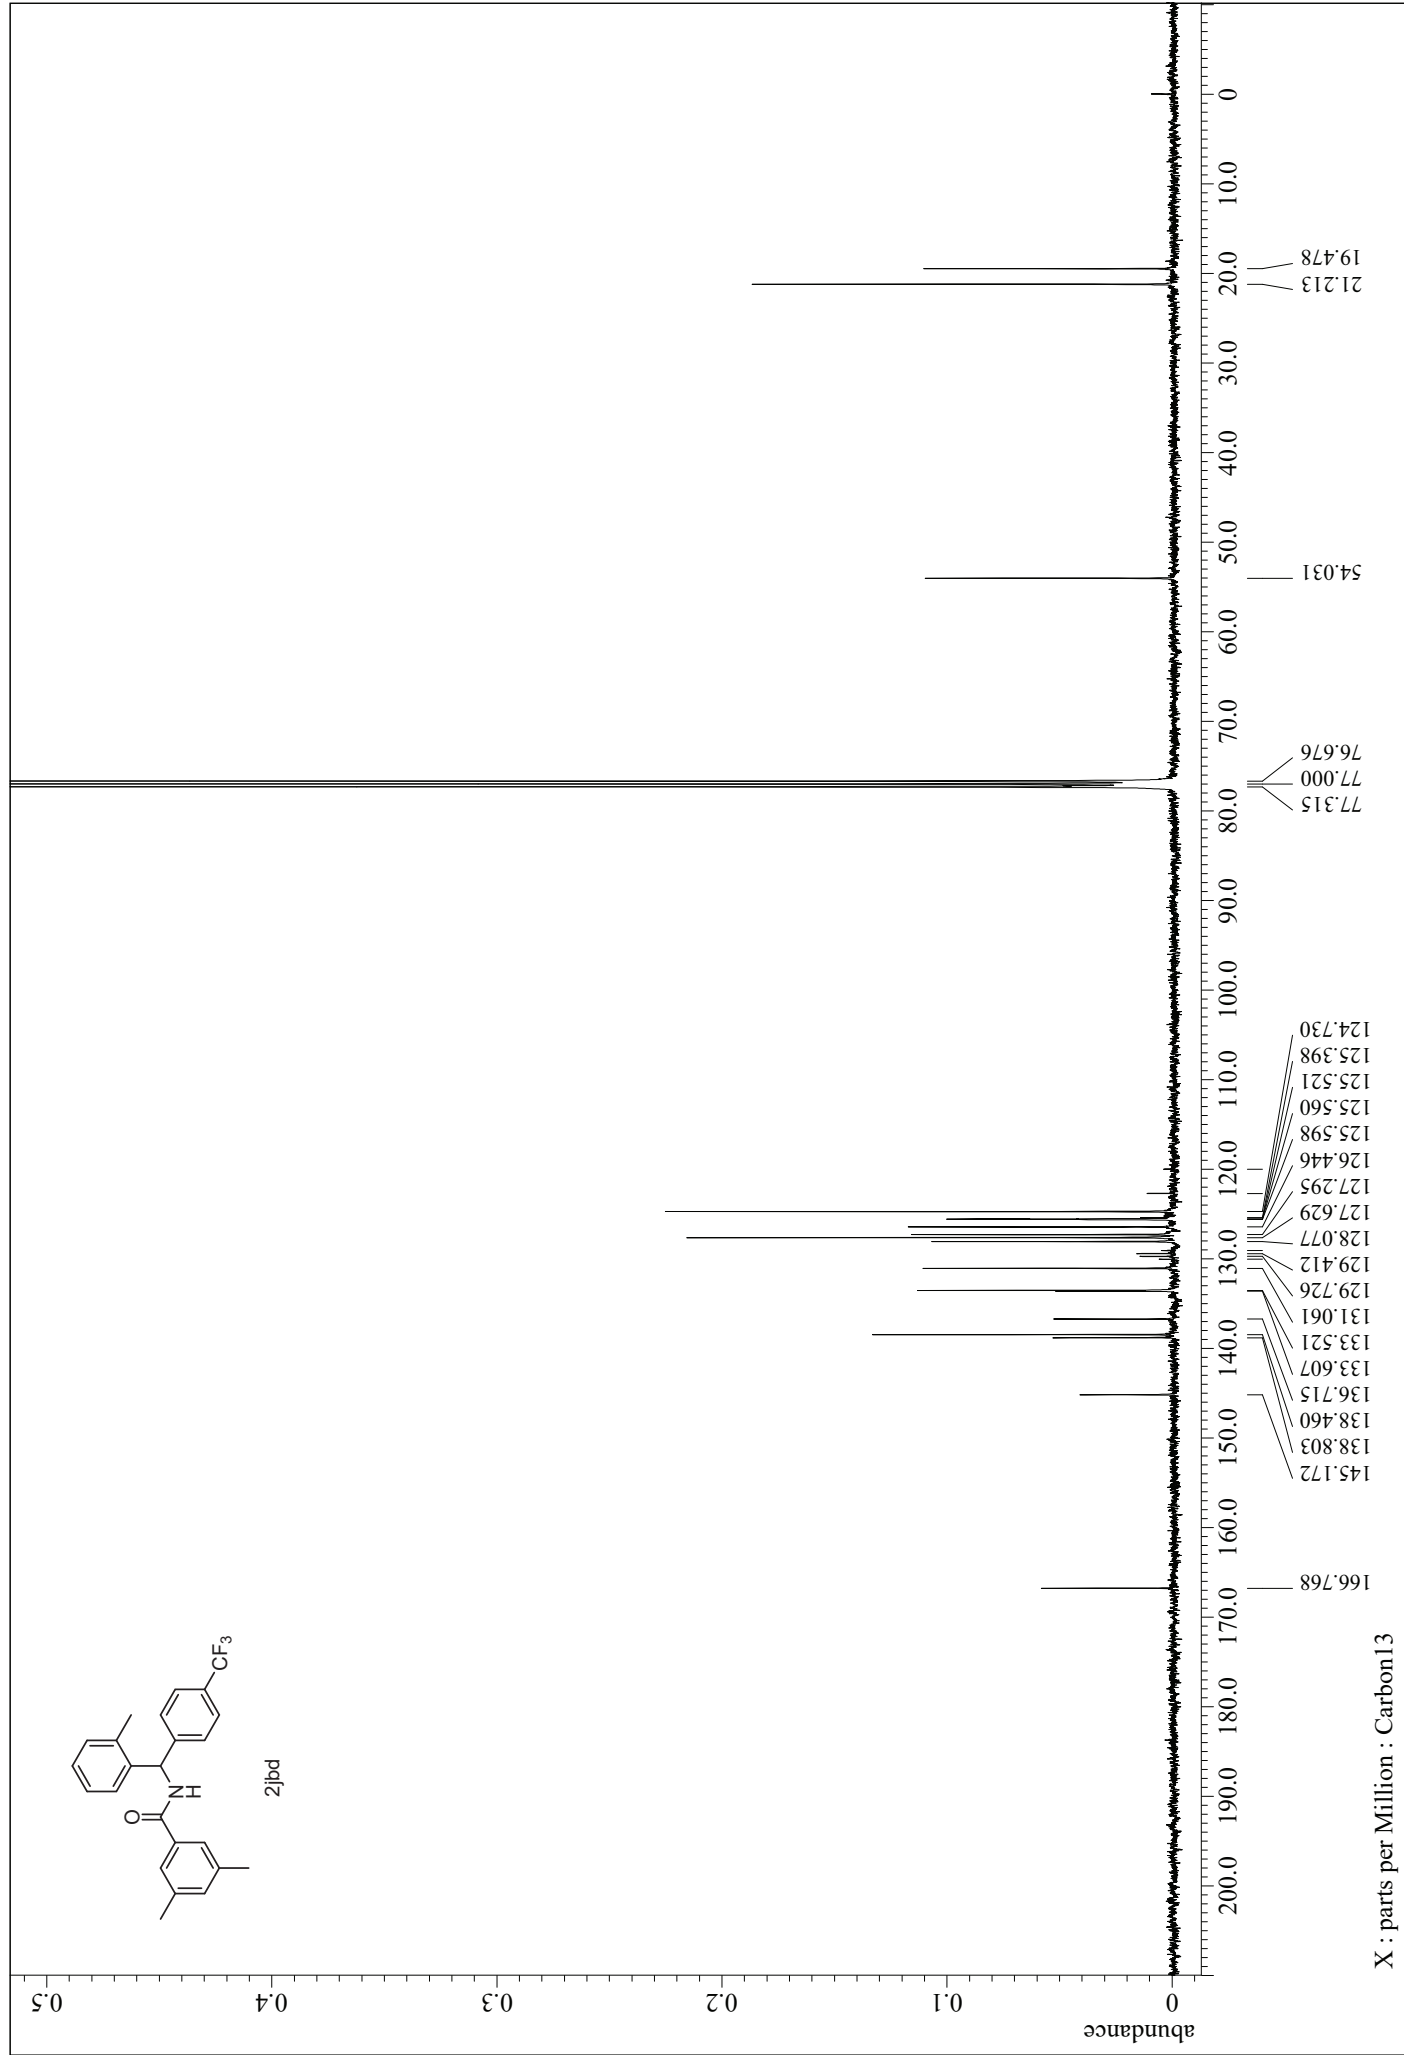

<sup>19</sup>F NMR (376 MHz, CDCl<sub>3</sub>)

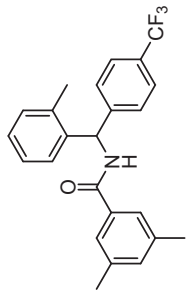

2jbd

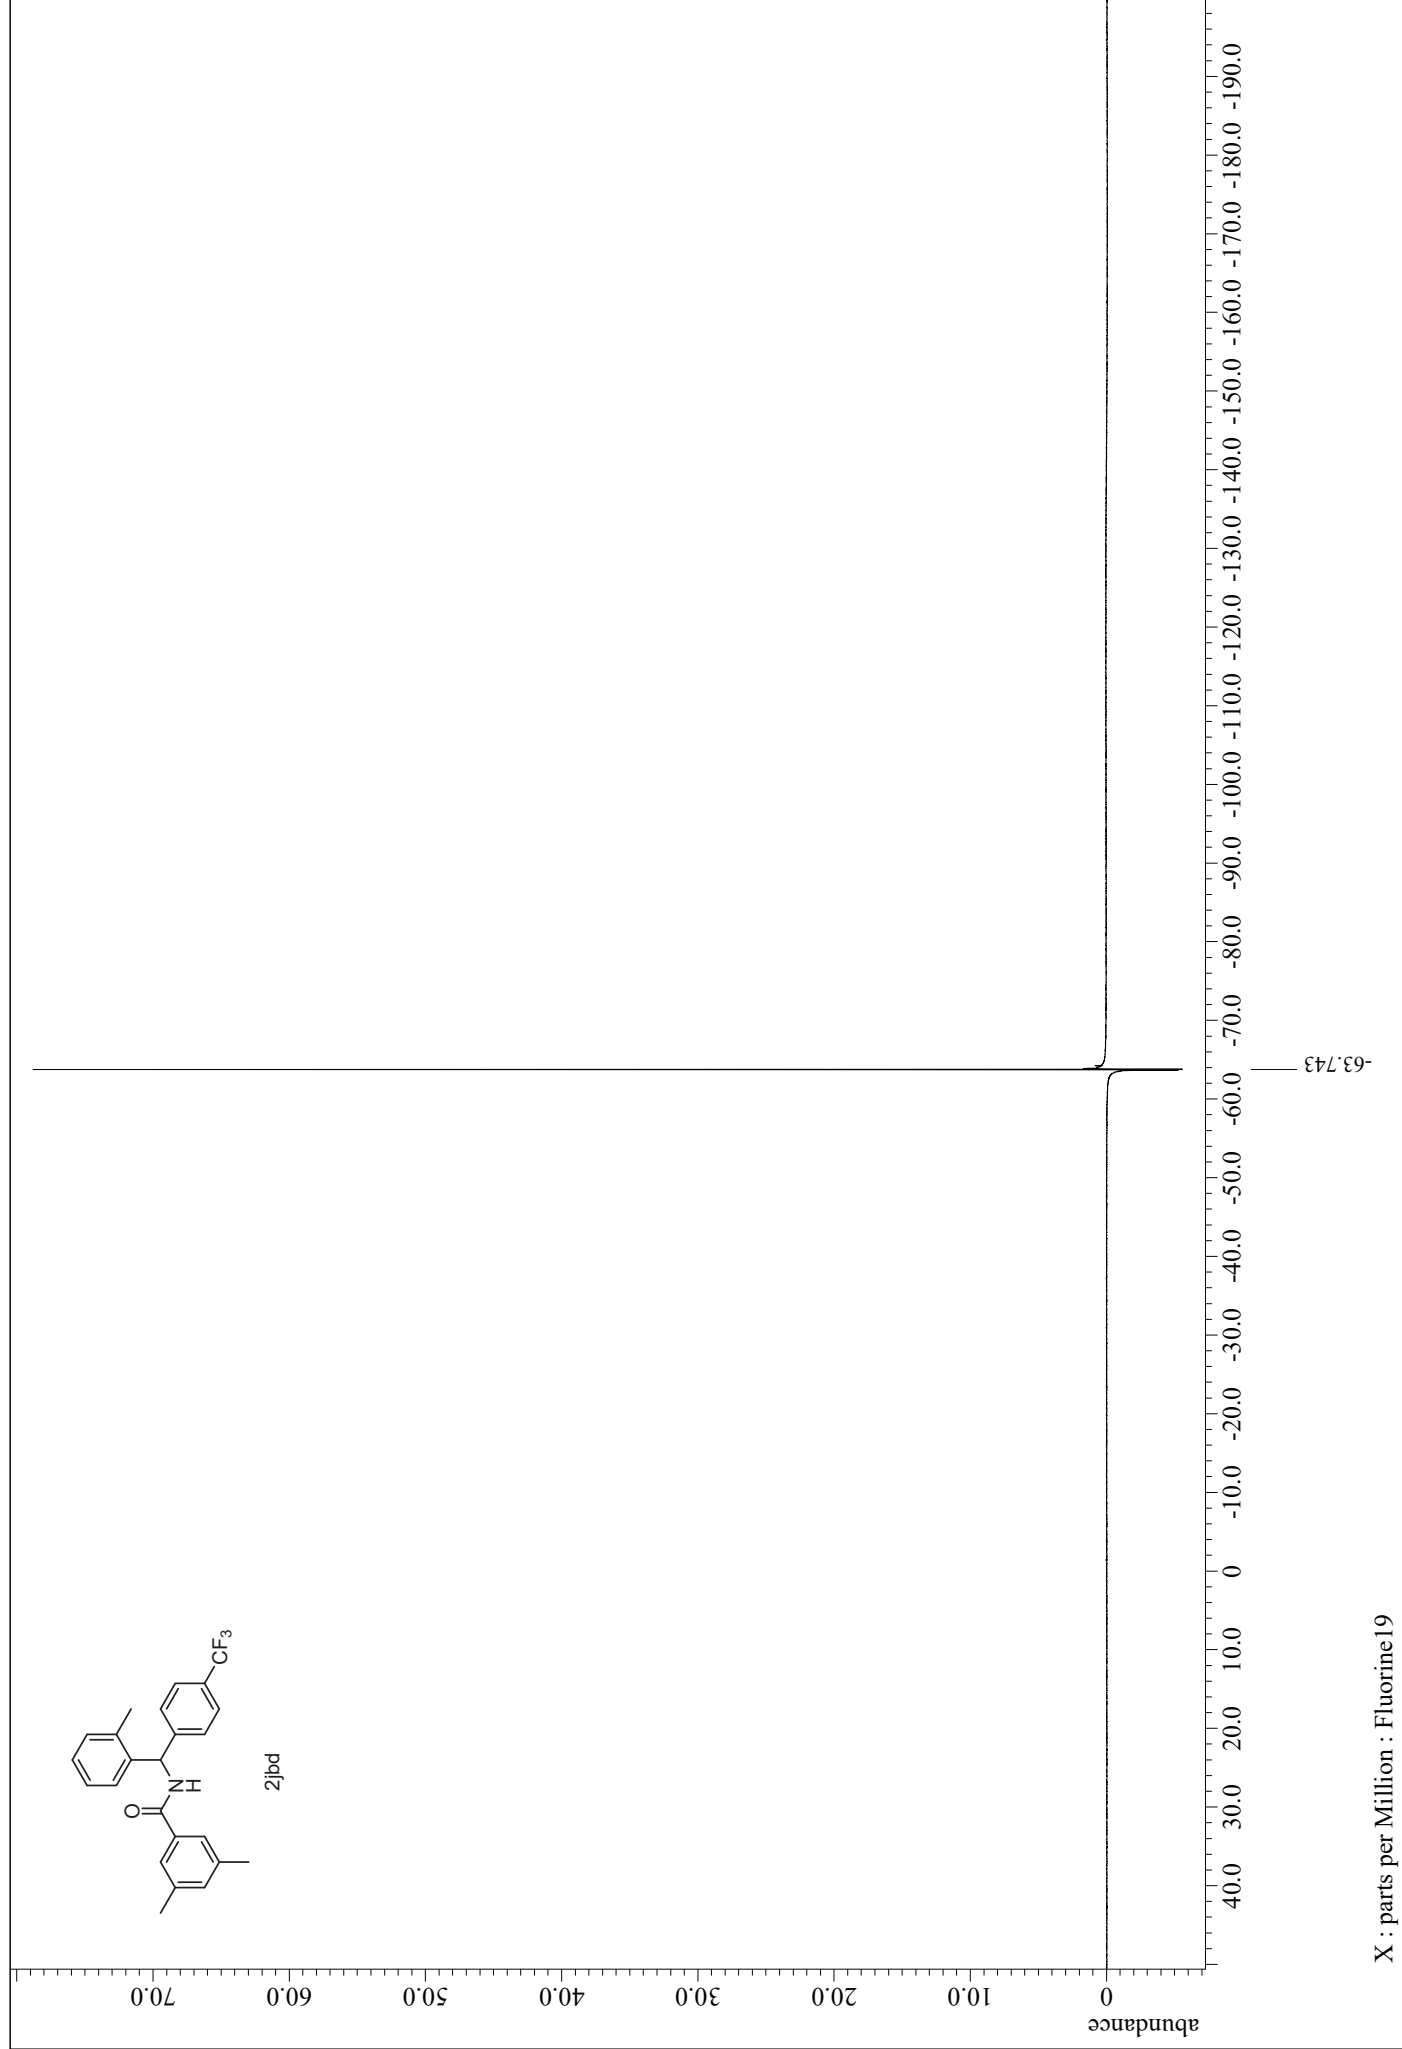

X : parts per Million : Fluorine 19

<sup>1</sup>H NMR (400 MHz, CDCl<sub>3</sub>)

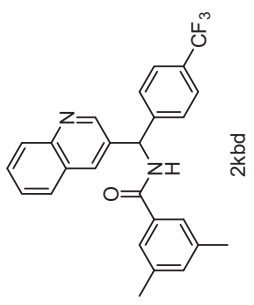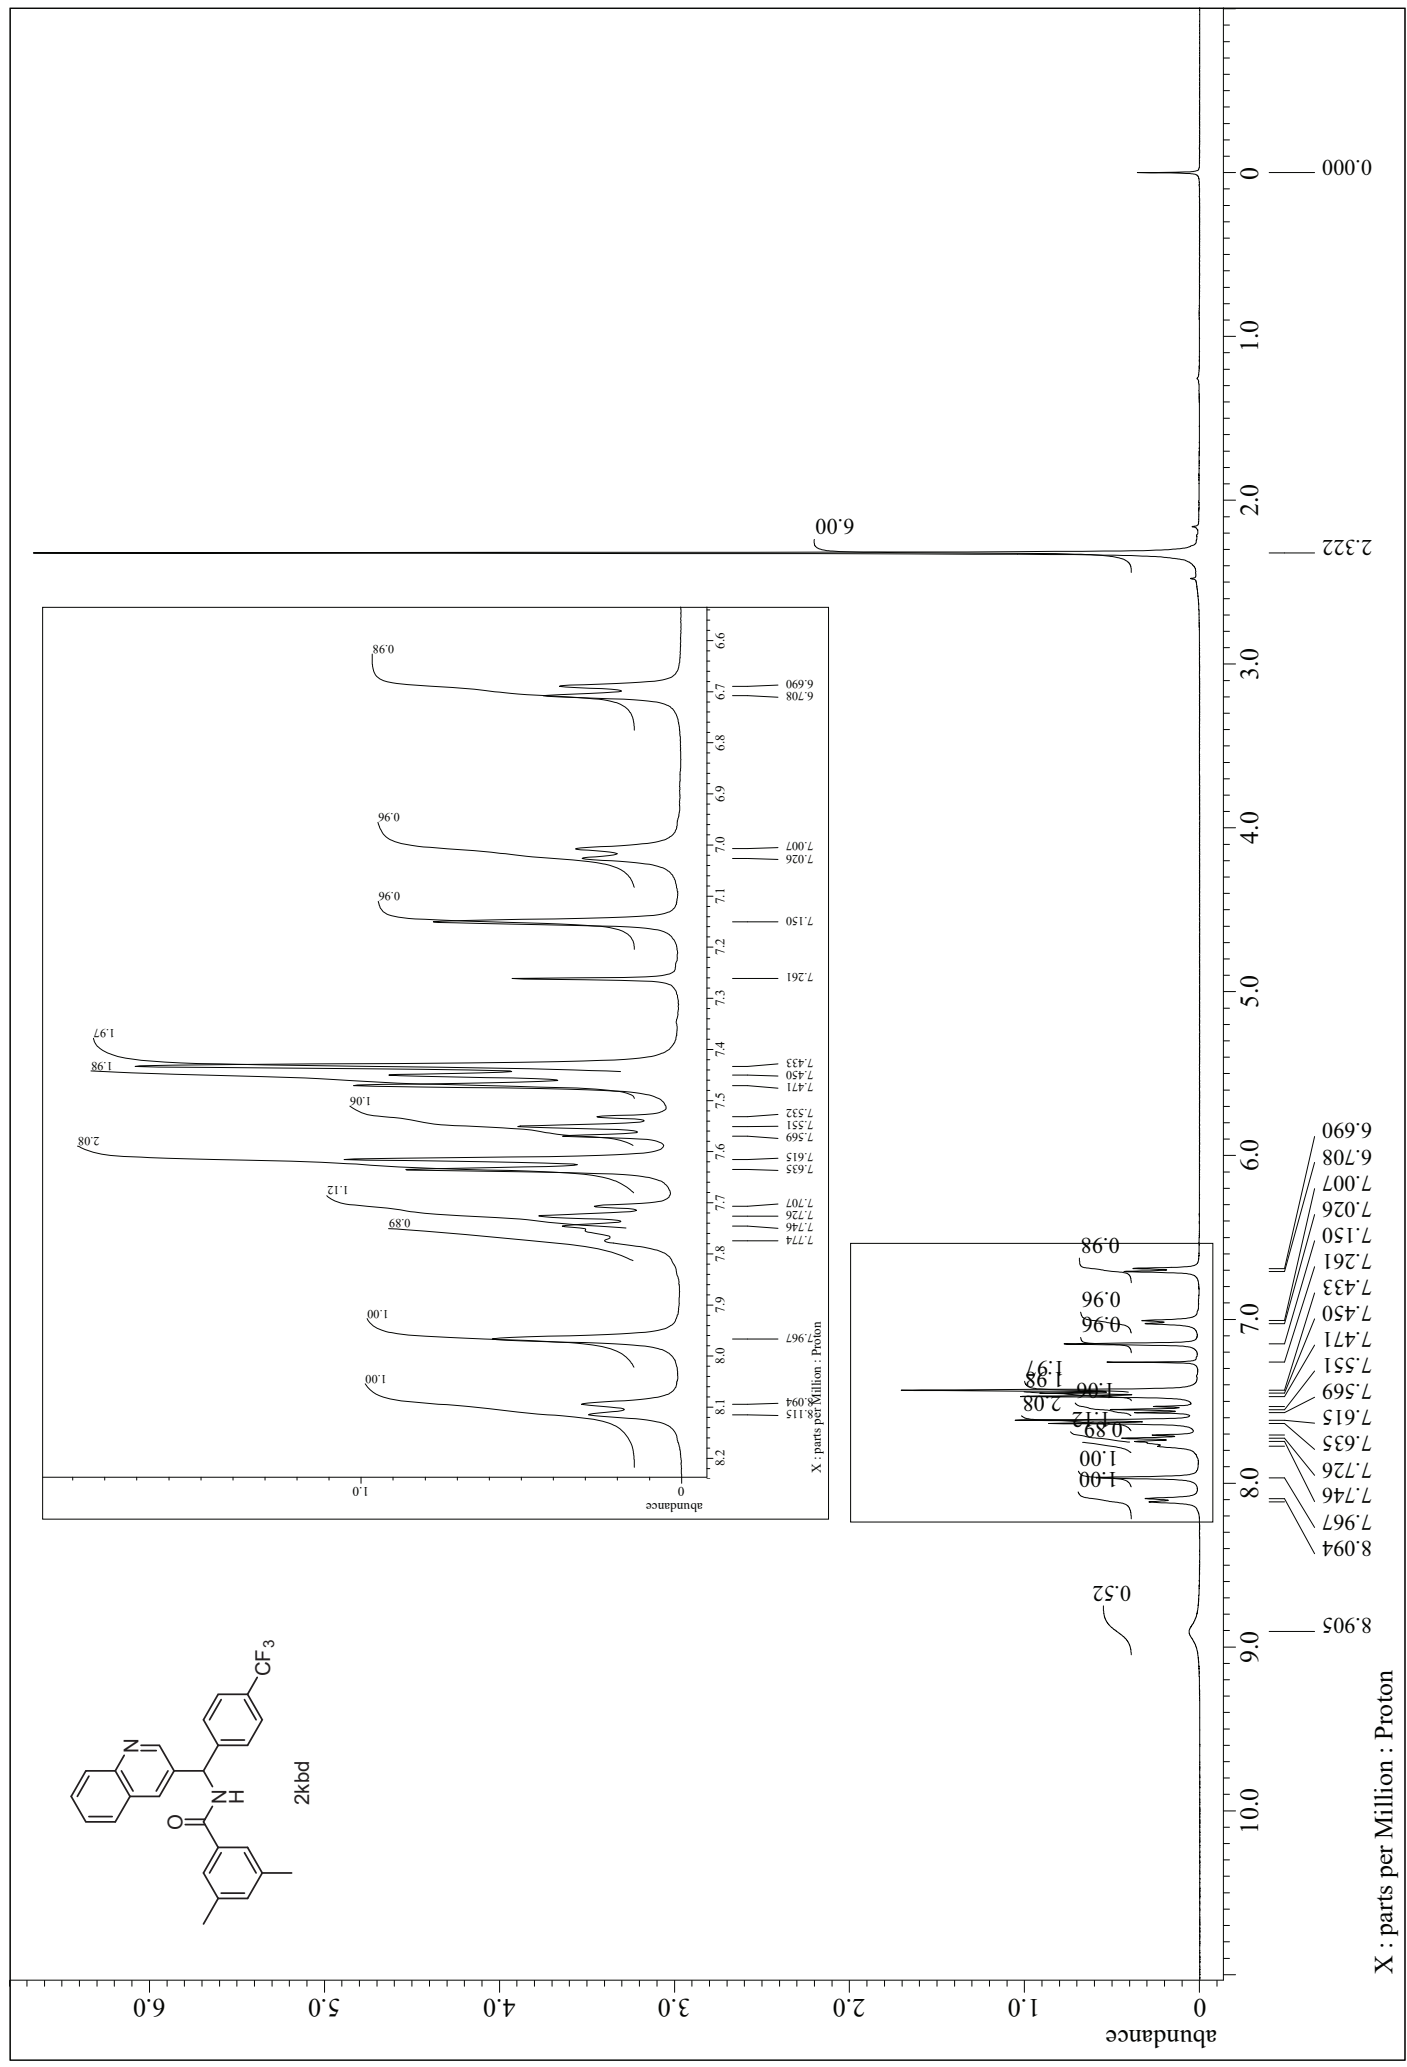



<sup>13</sup>C NMR (101 MHz, CDCl<sub>3</sub>)

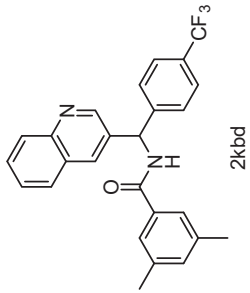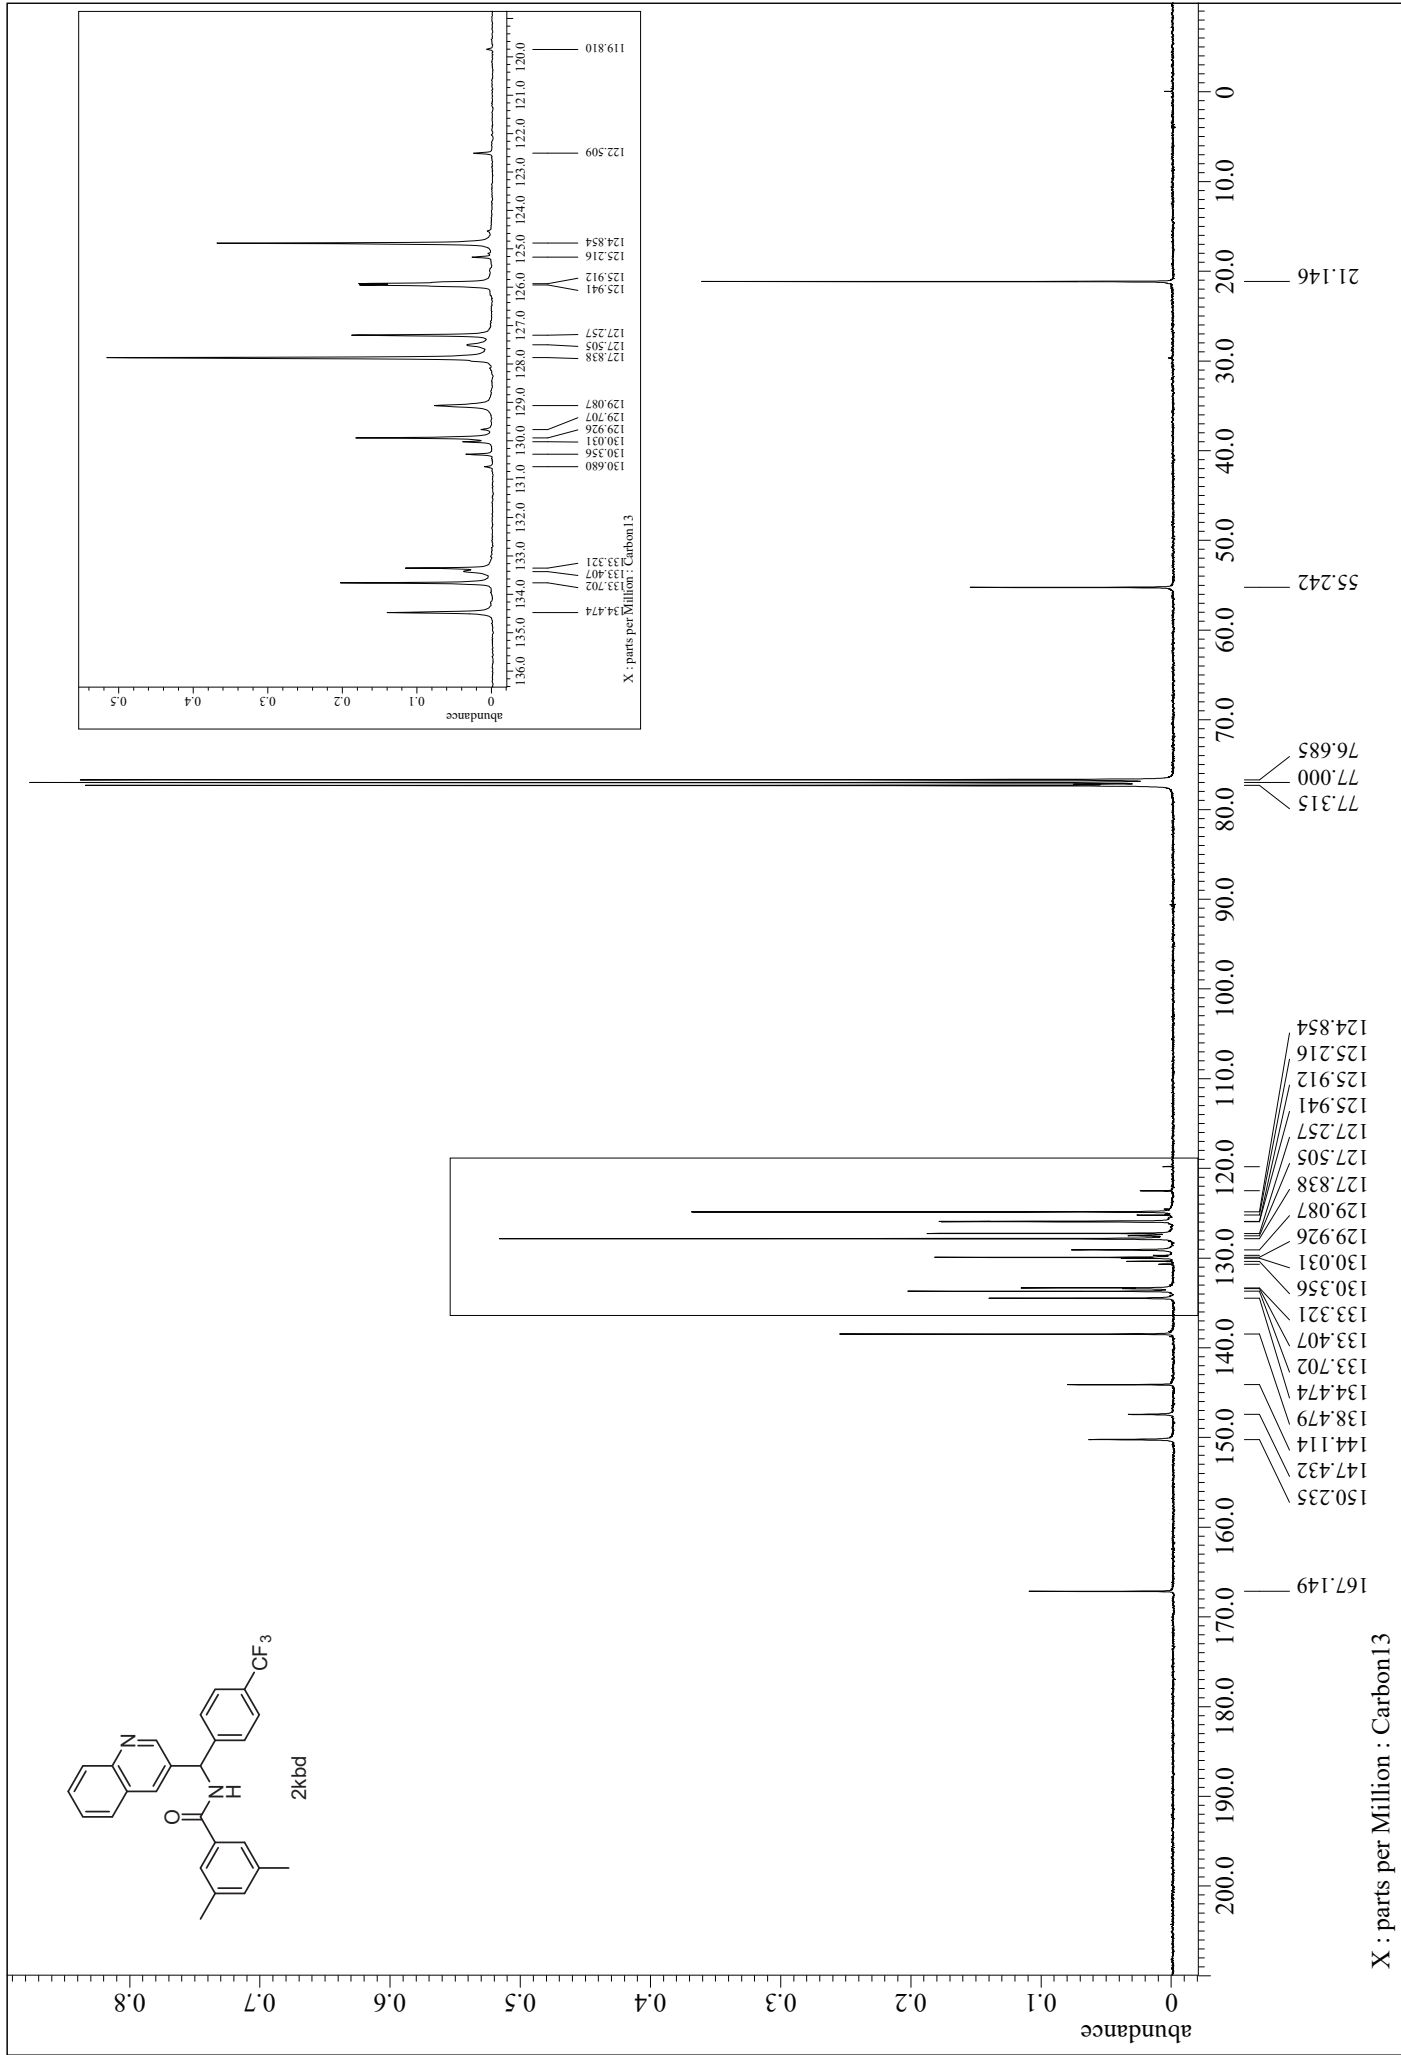

$^{19}\text{F}$  NMR (376 MHz,  $\text{CDCl}_3$ )

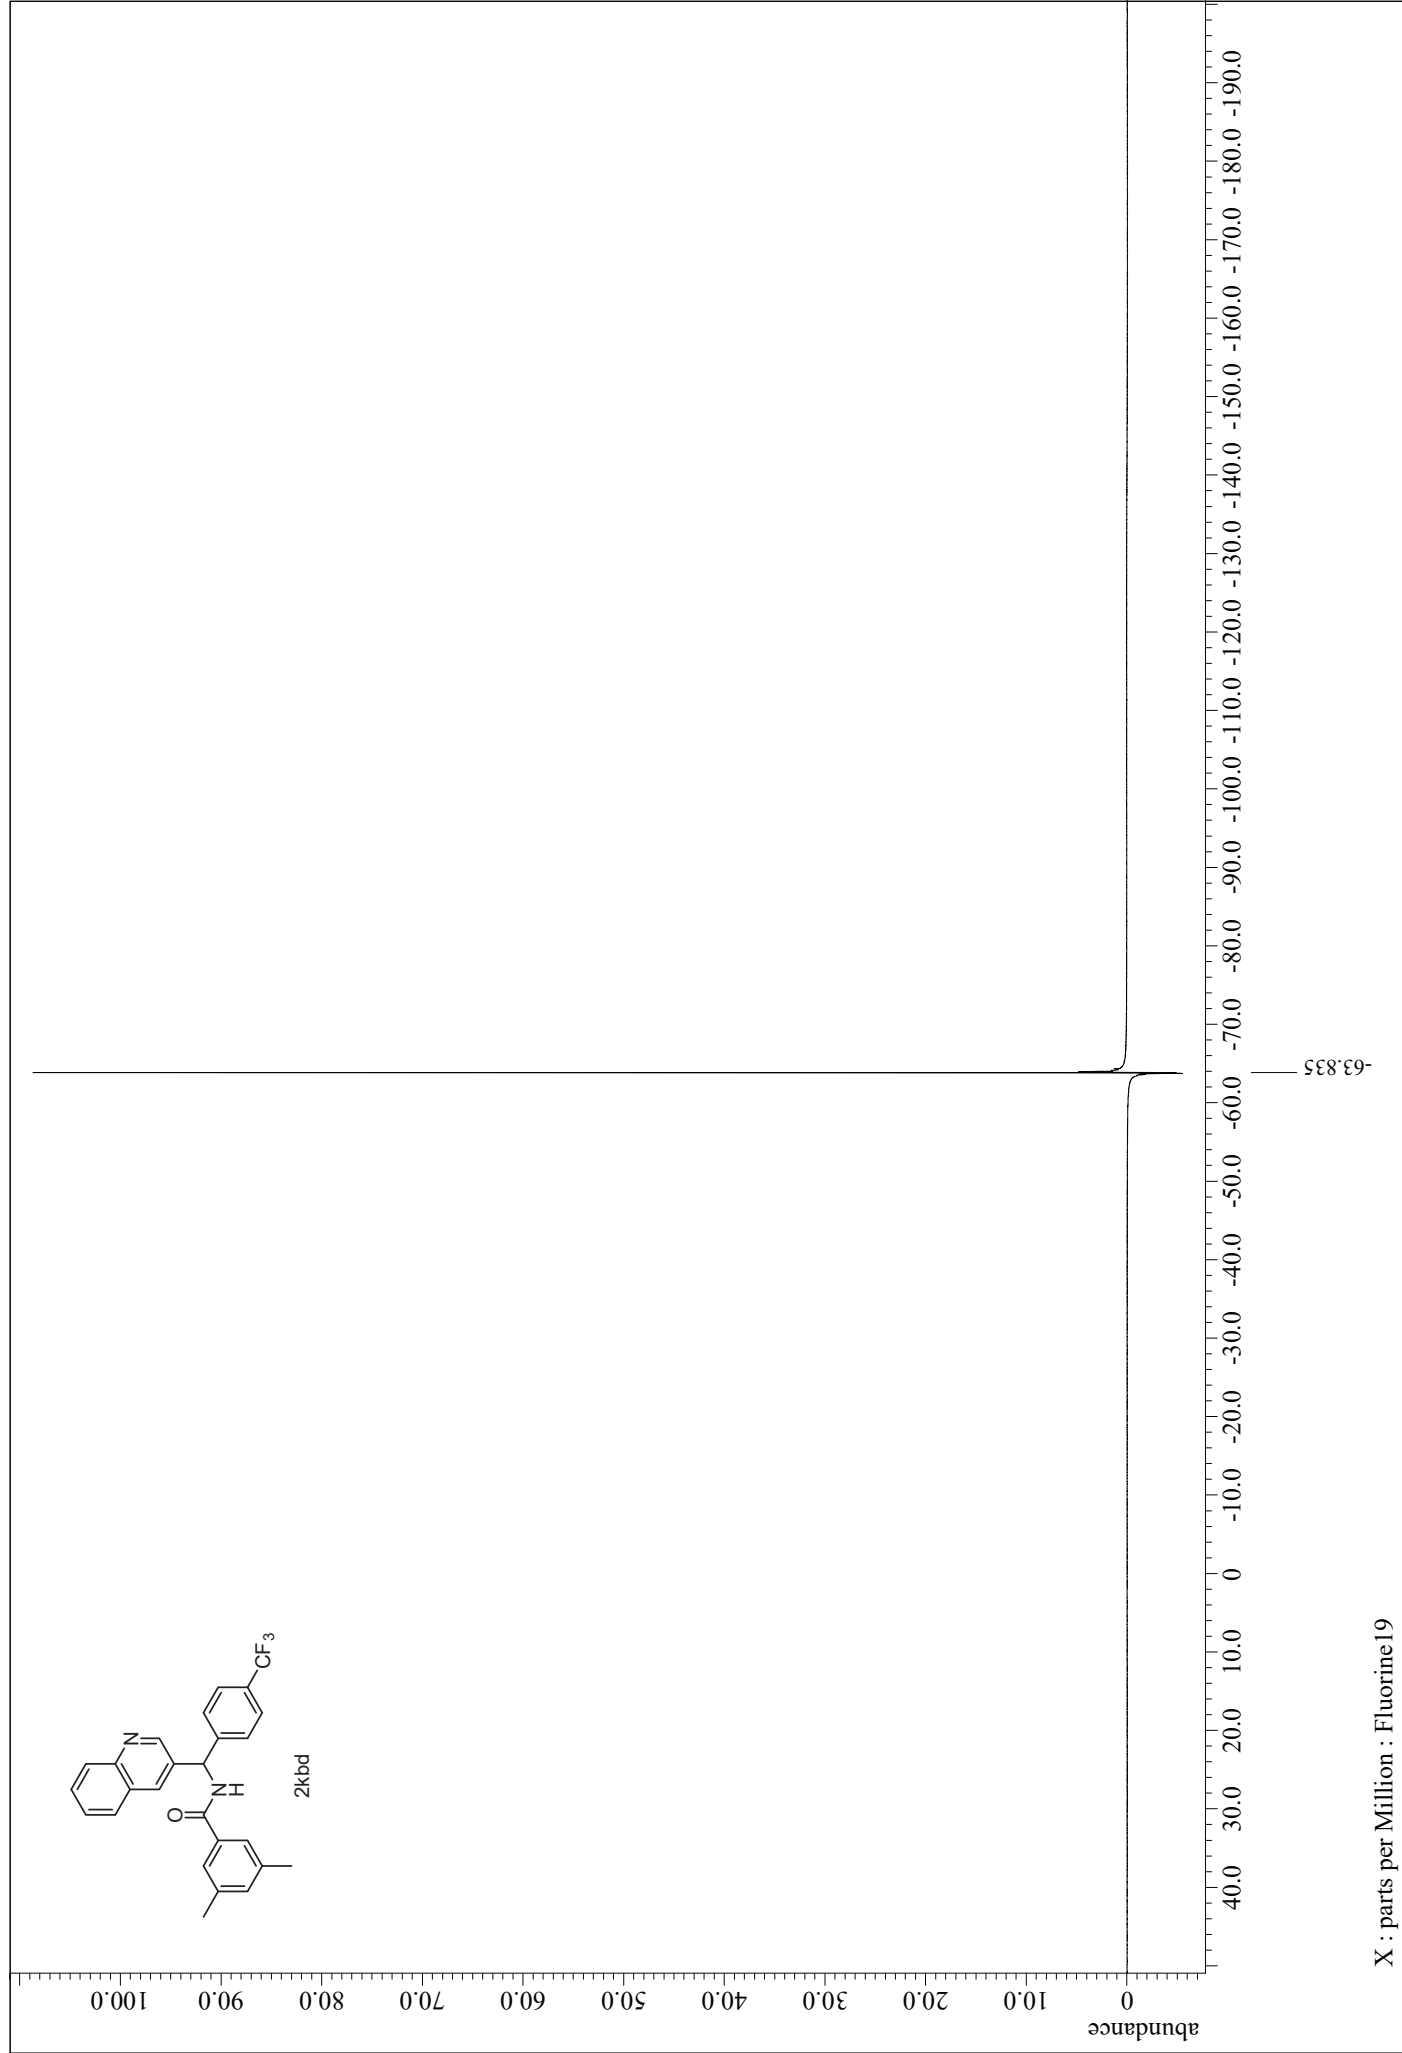

X : parts per Million : Fluorine 19

<sup>1</sup>H NMR (400 MHz, CDCl<sub>3</sub>)

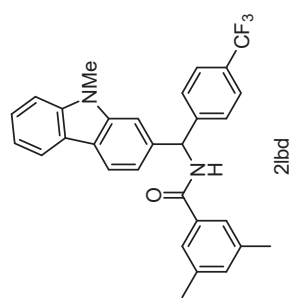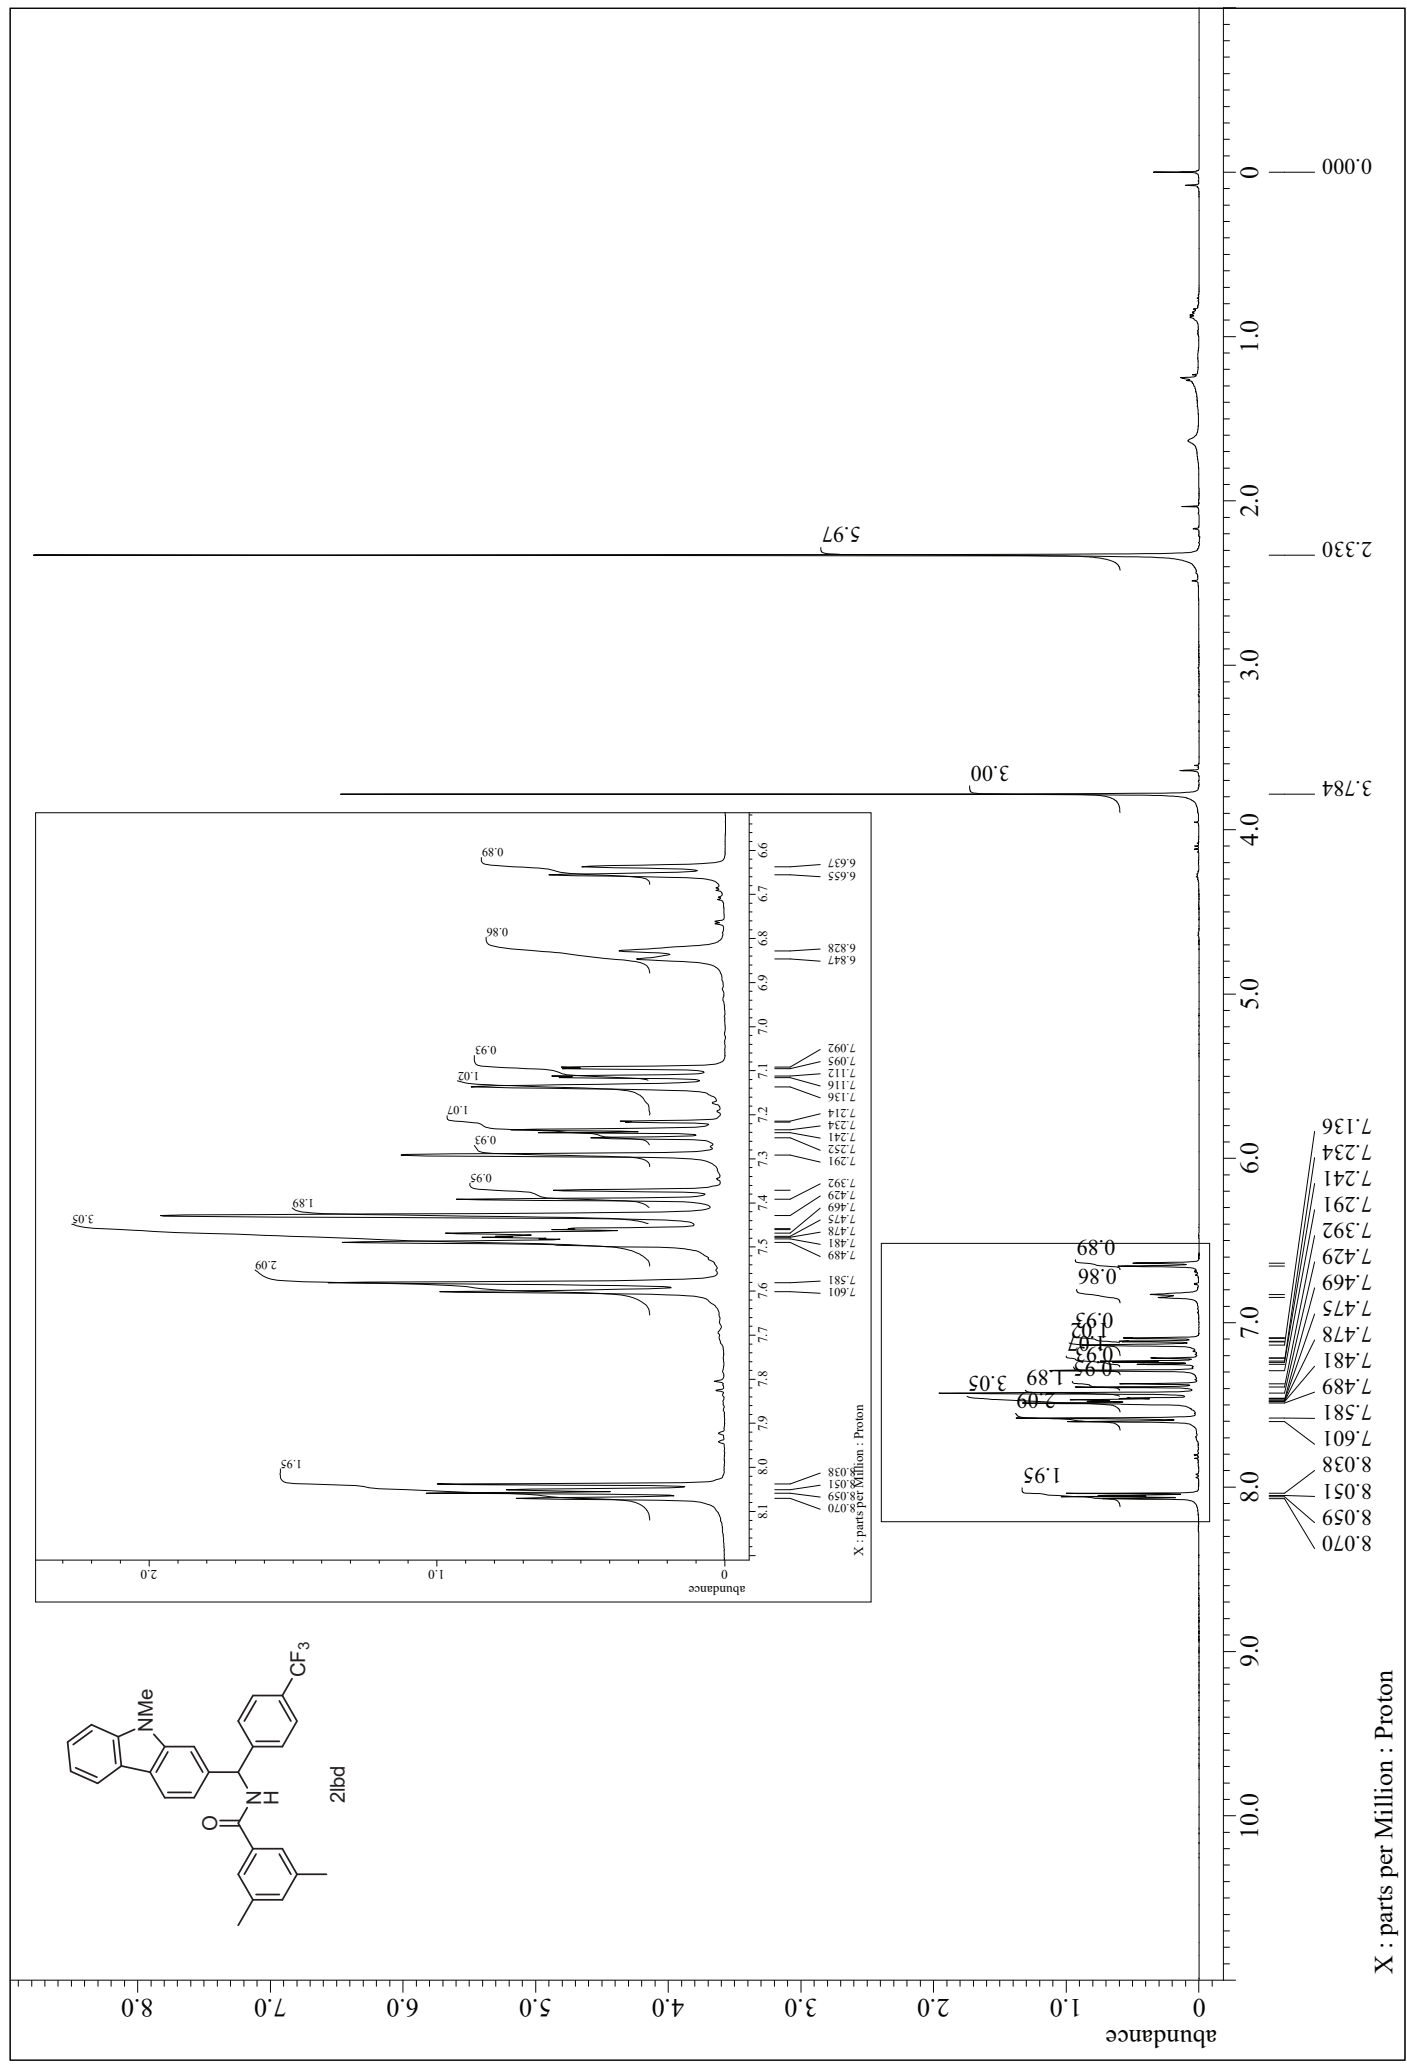

<sup>13</sup>C NMR (101 MHz, CDCl<sub>3</sub>)

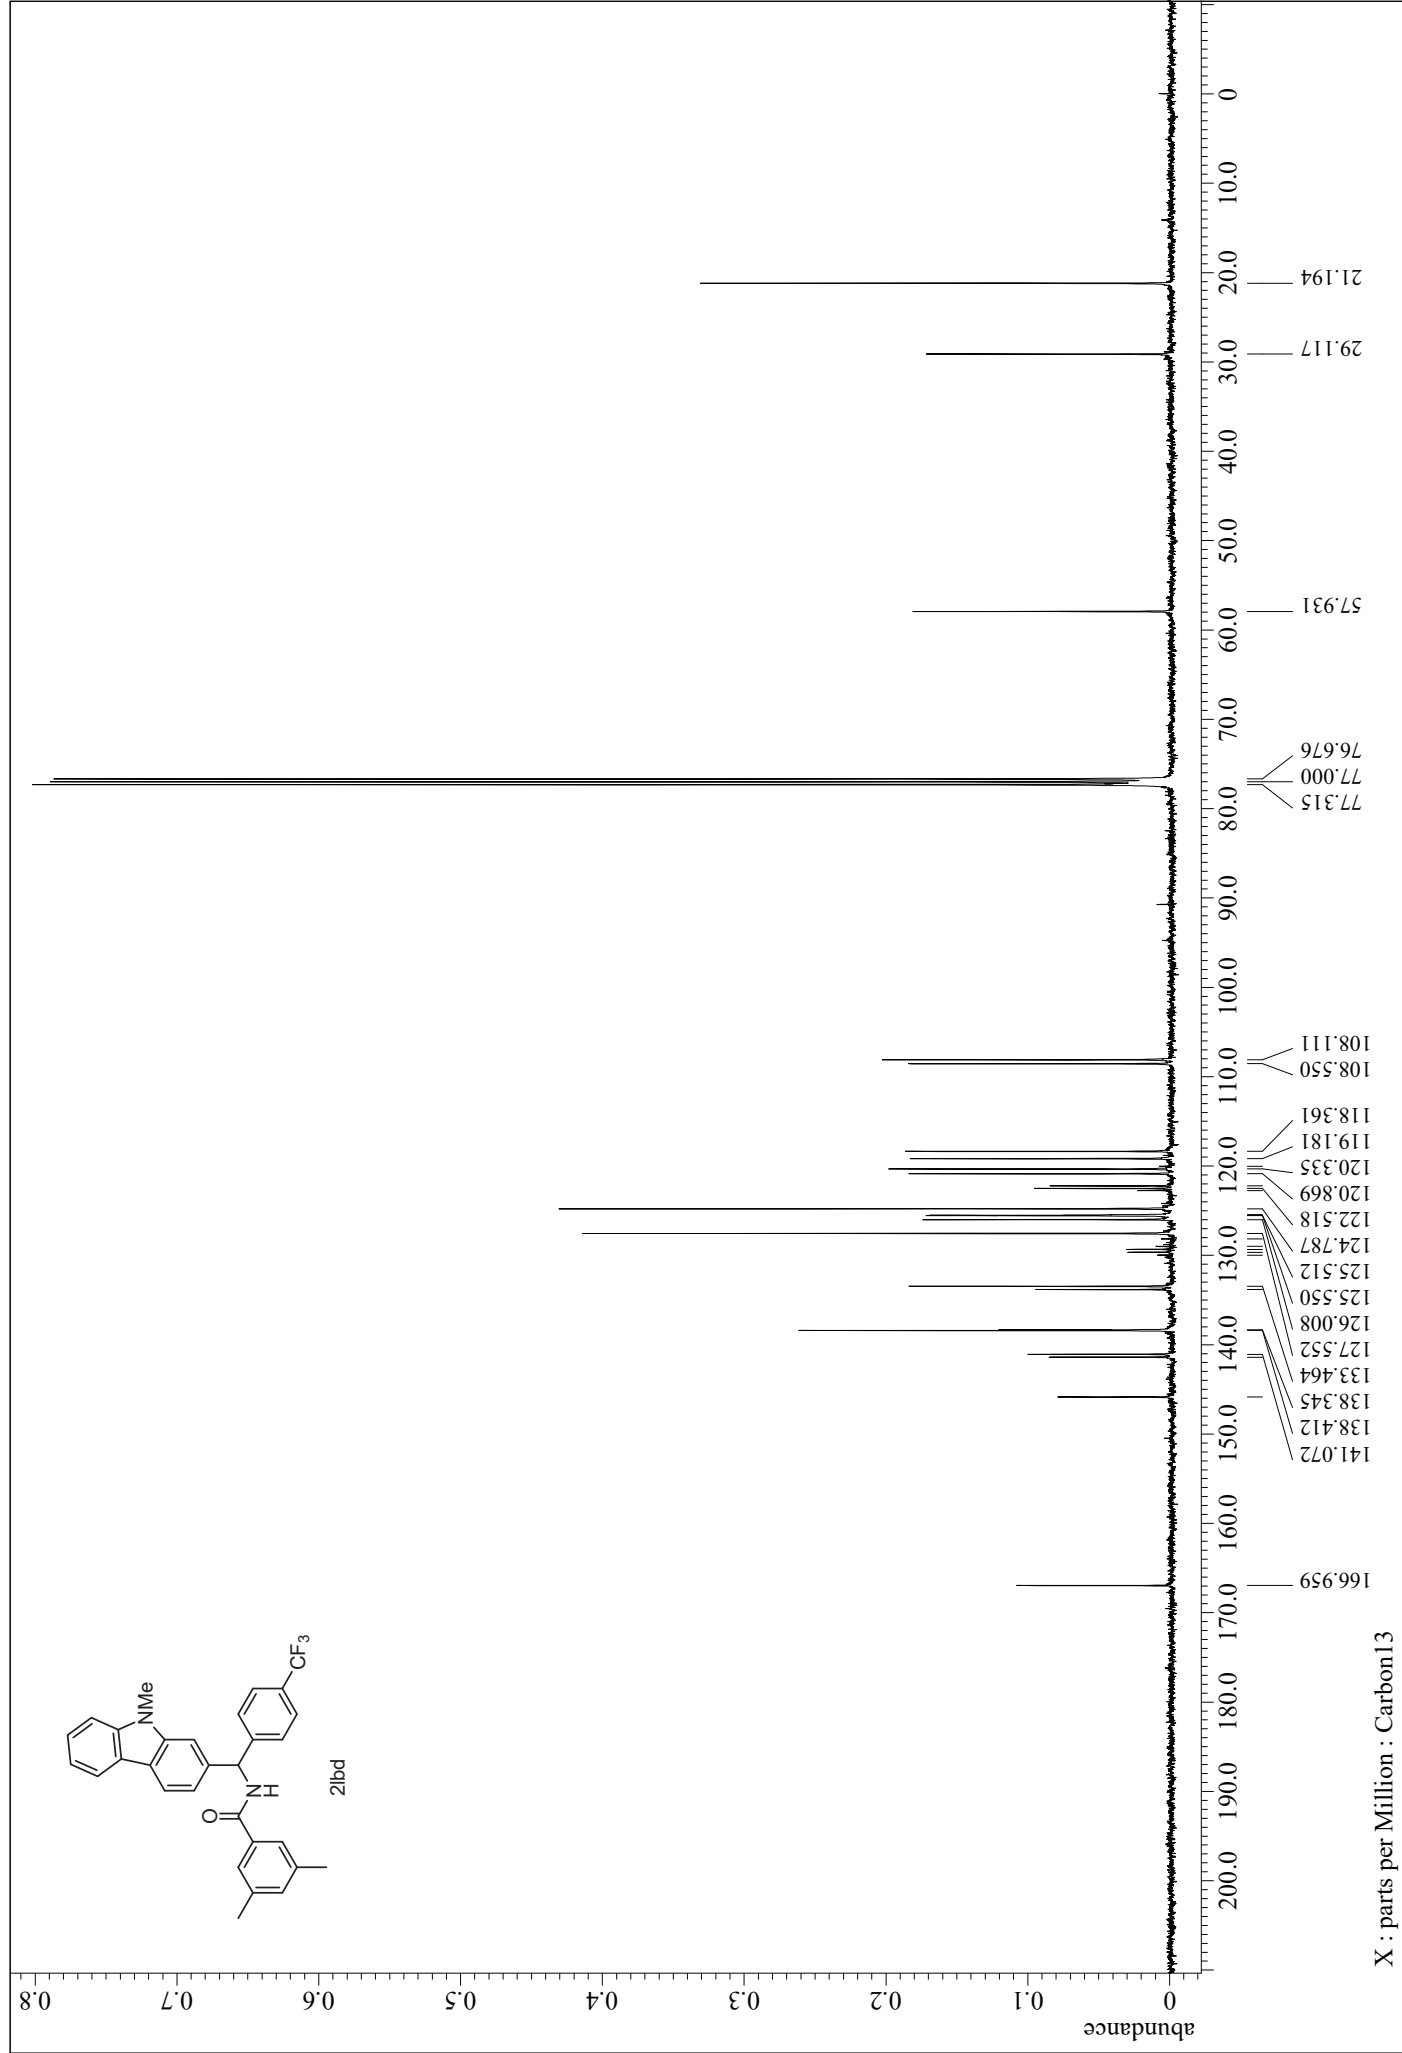

<sup>19</sup>F NMR (376 MHz, CDCl<sub>3</sub>)

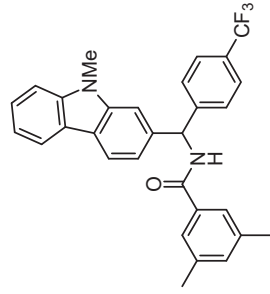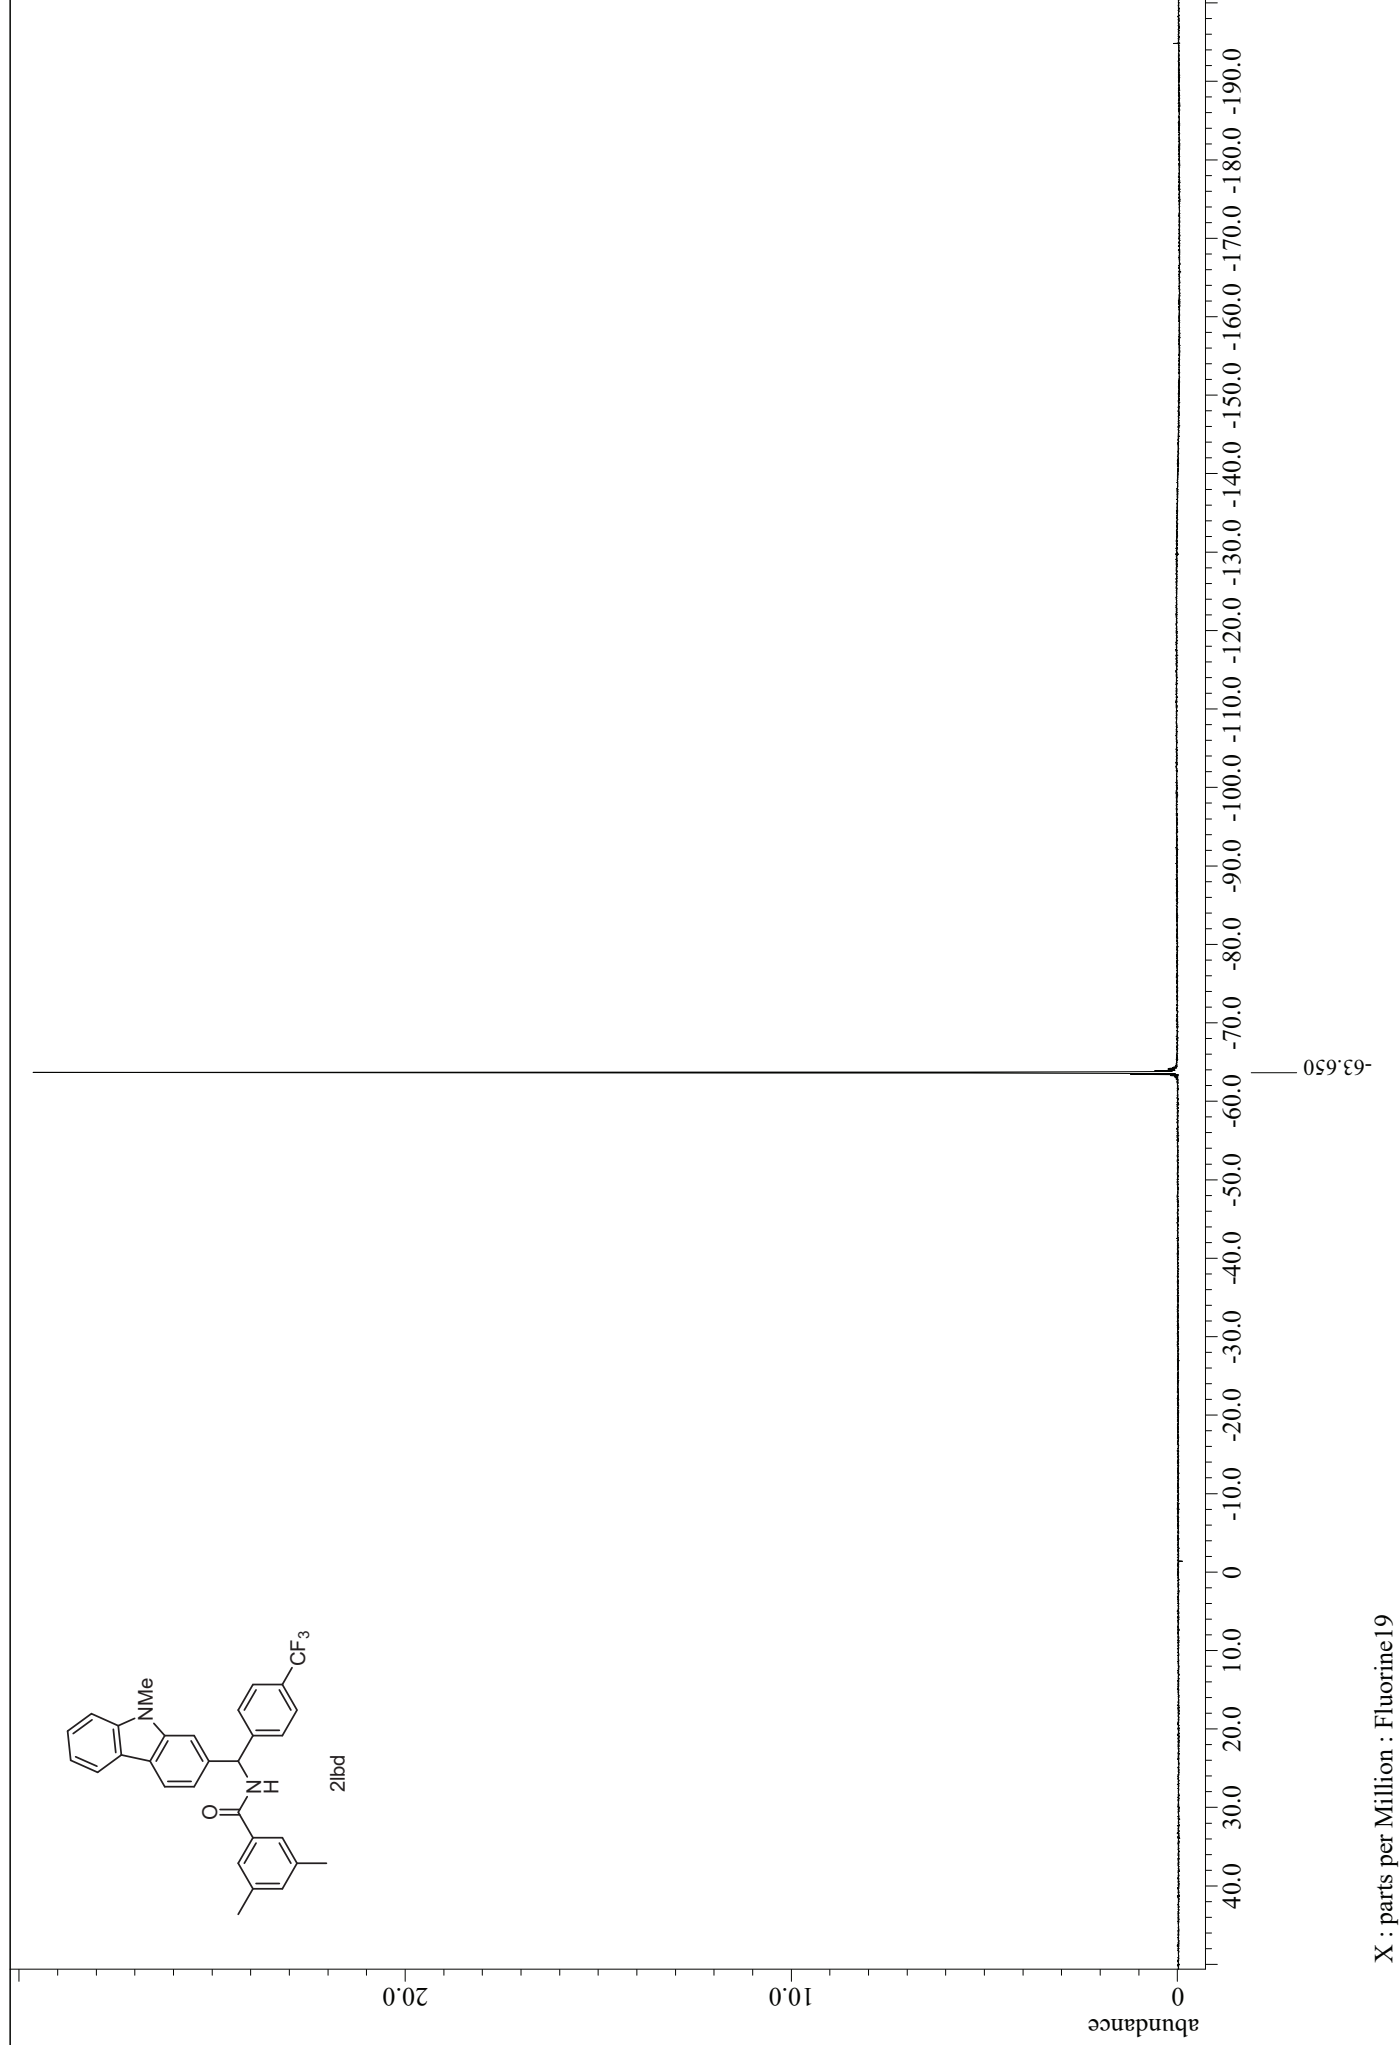

X : parts per Million : Fluorine19

<sup>1</sup>H NMR (400 MHz, CDCl<sub>3</sub>)

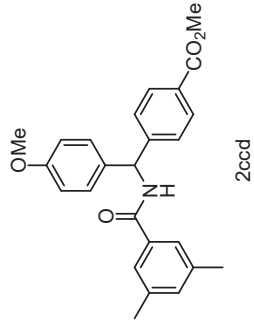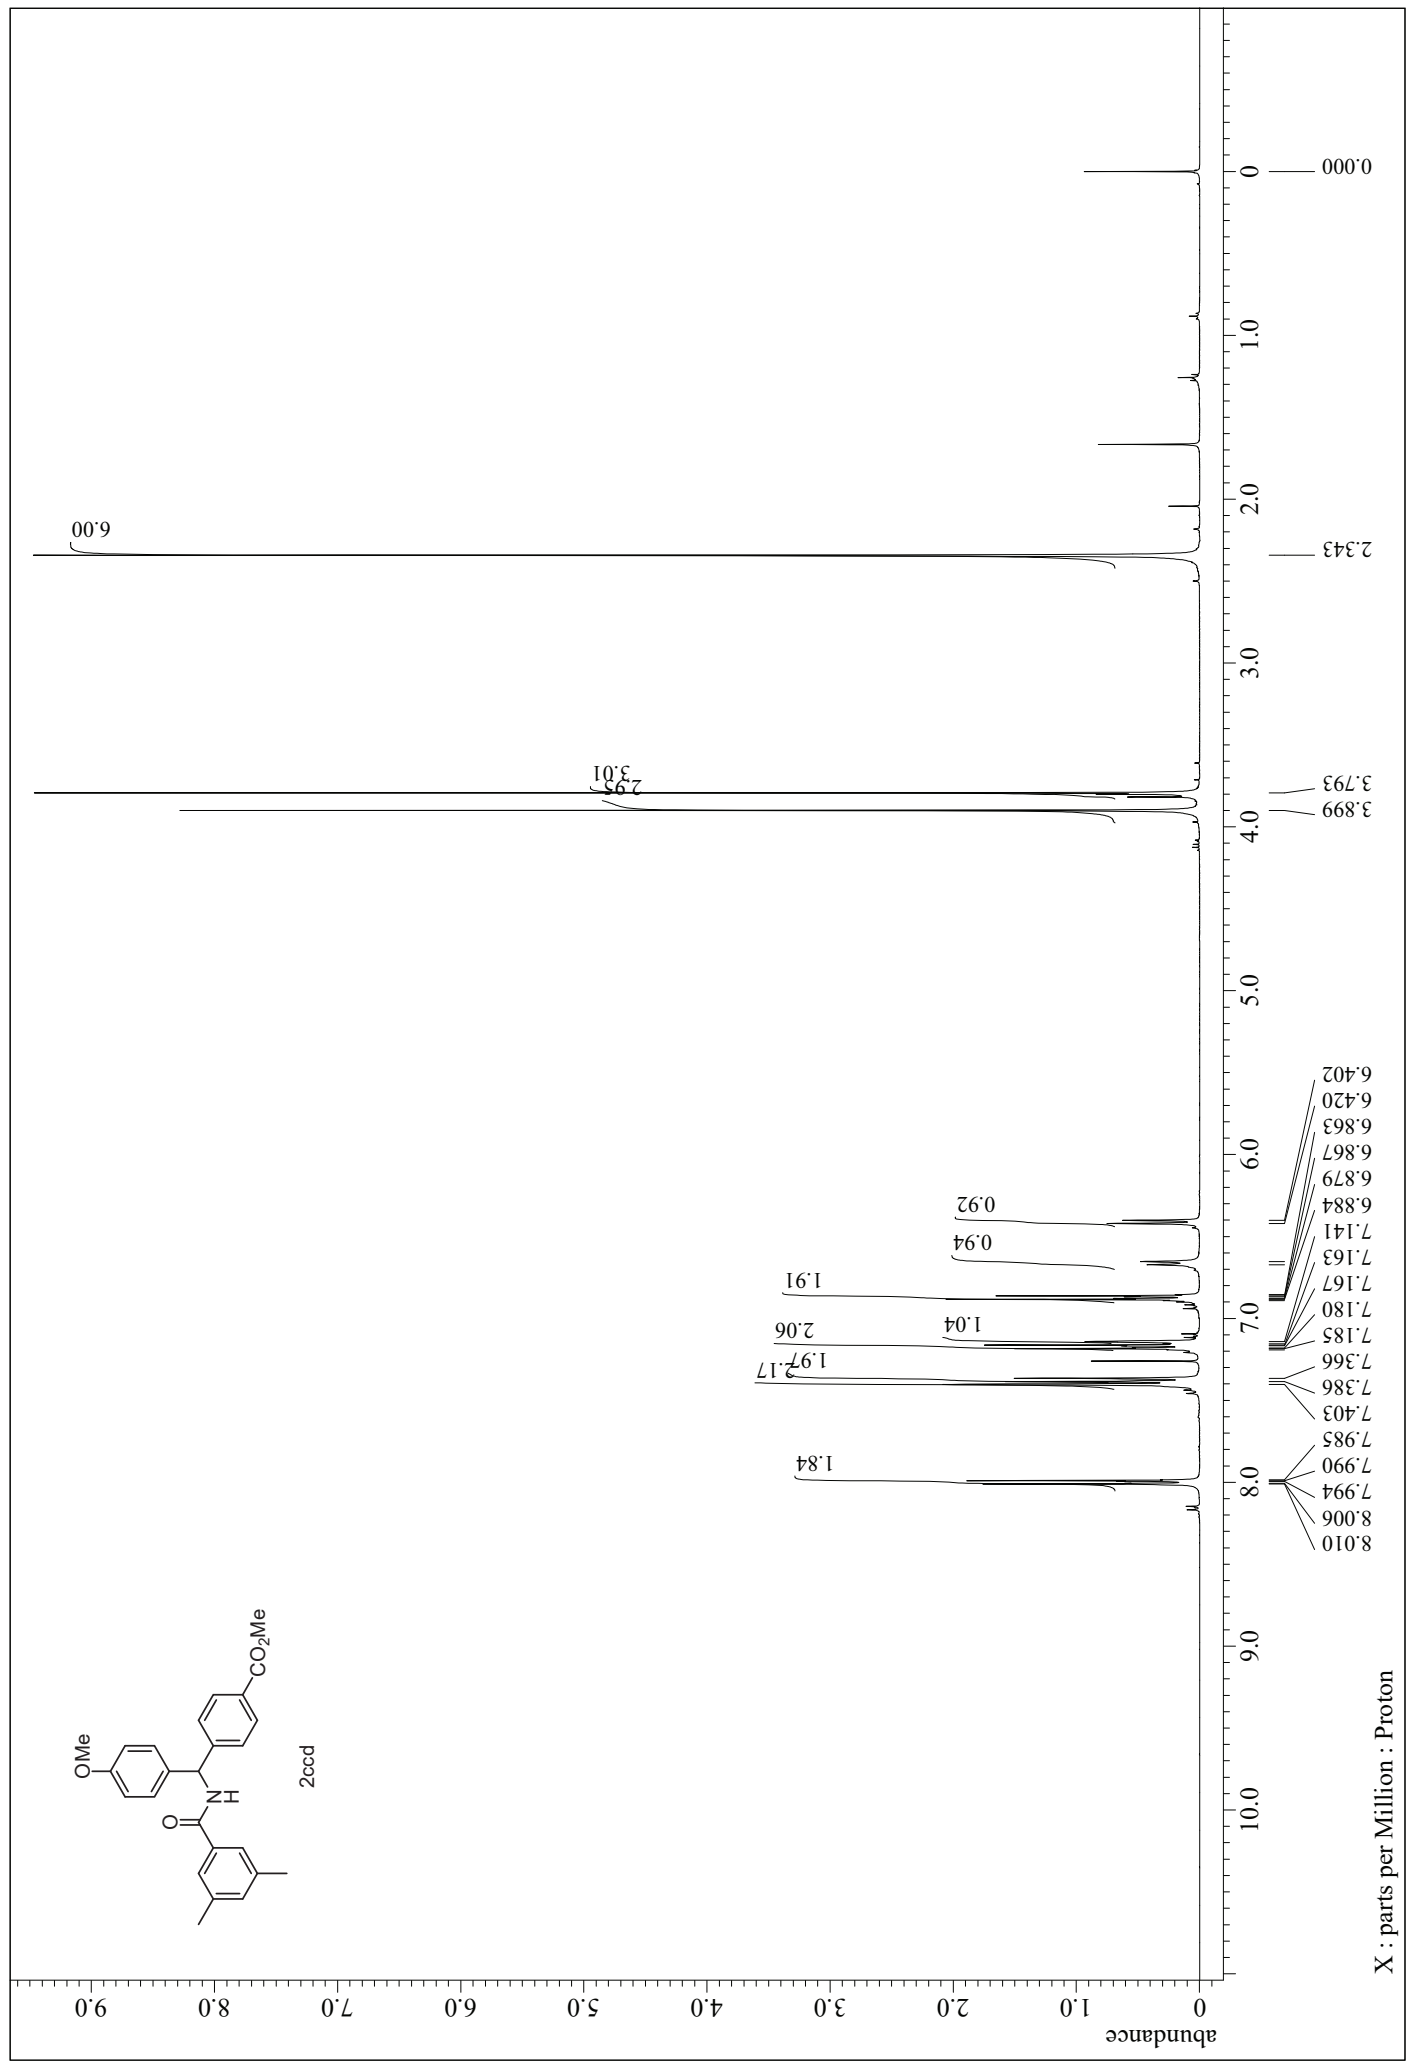

<sup>13</sup>C NMR (101 MHz, CDCl<sub>3</sub>)

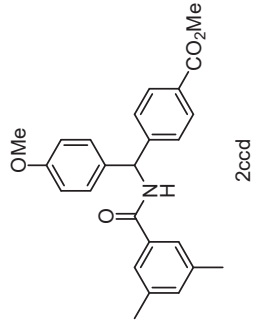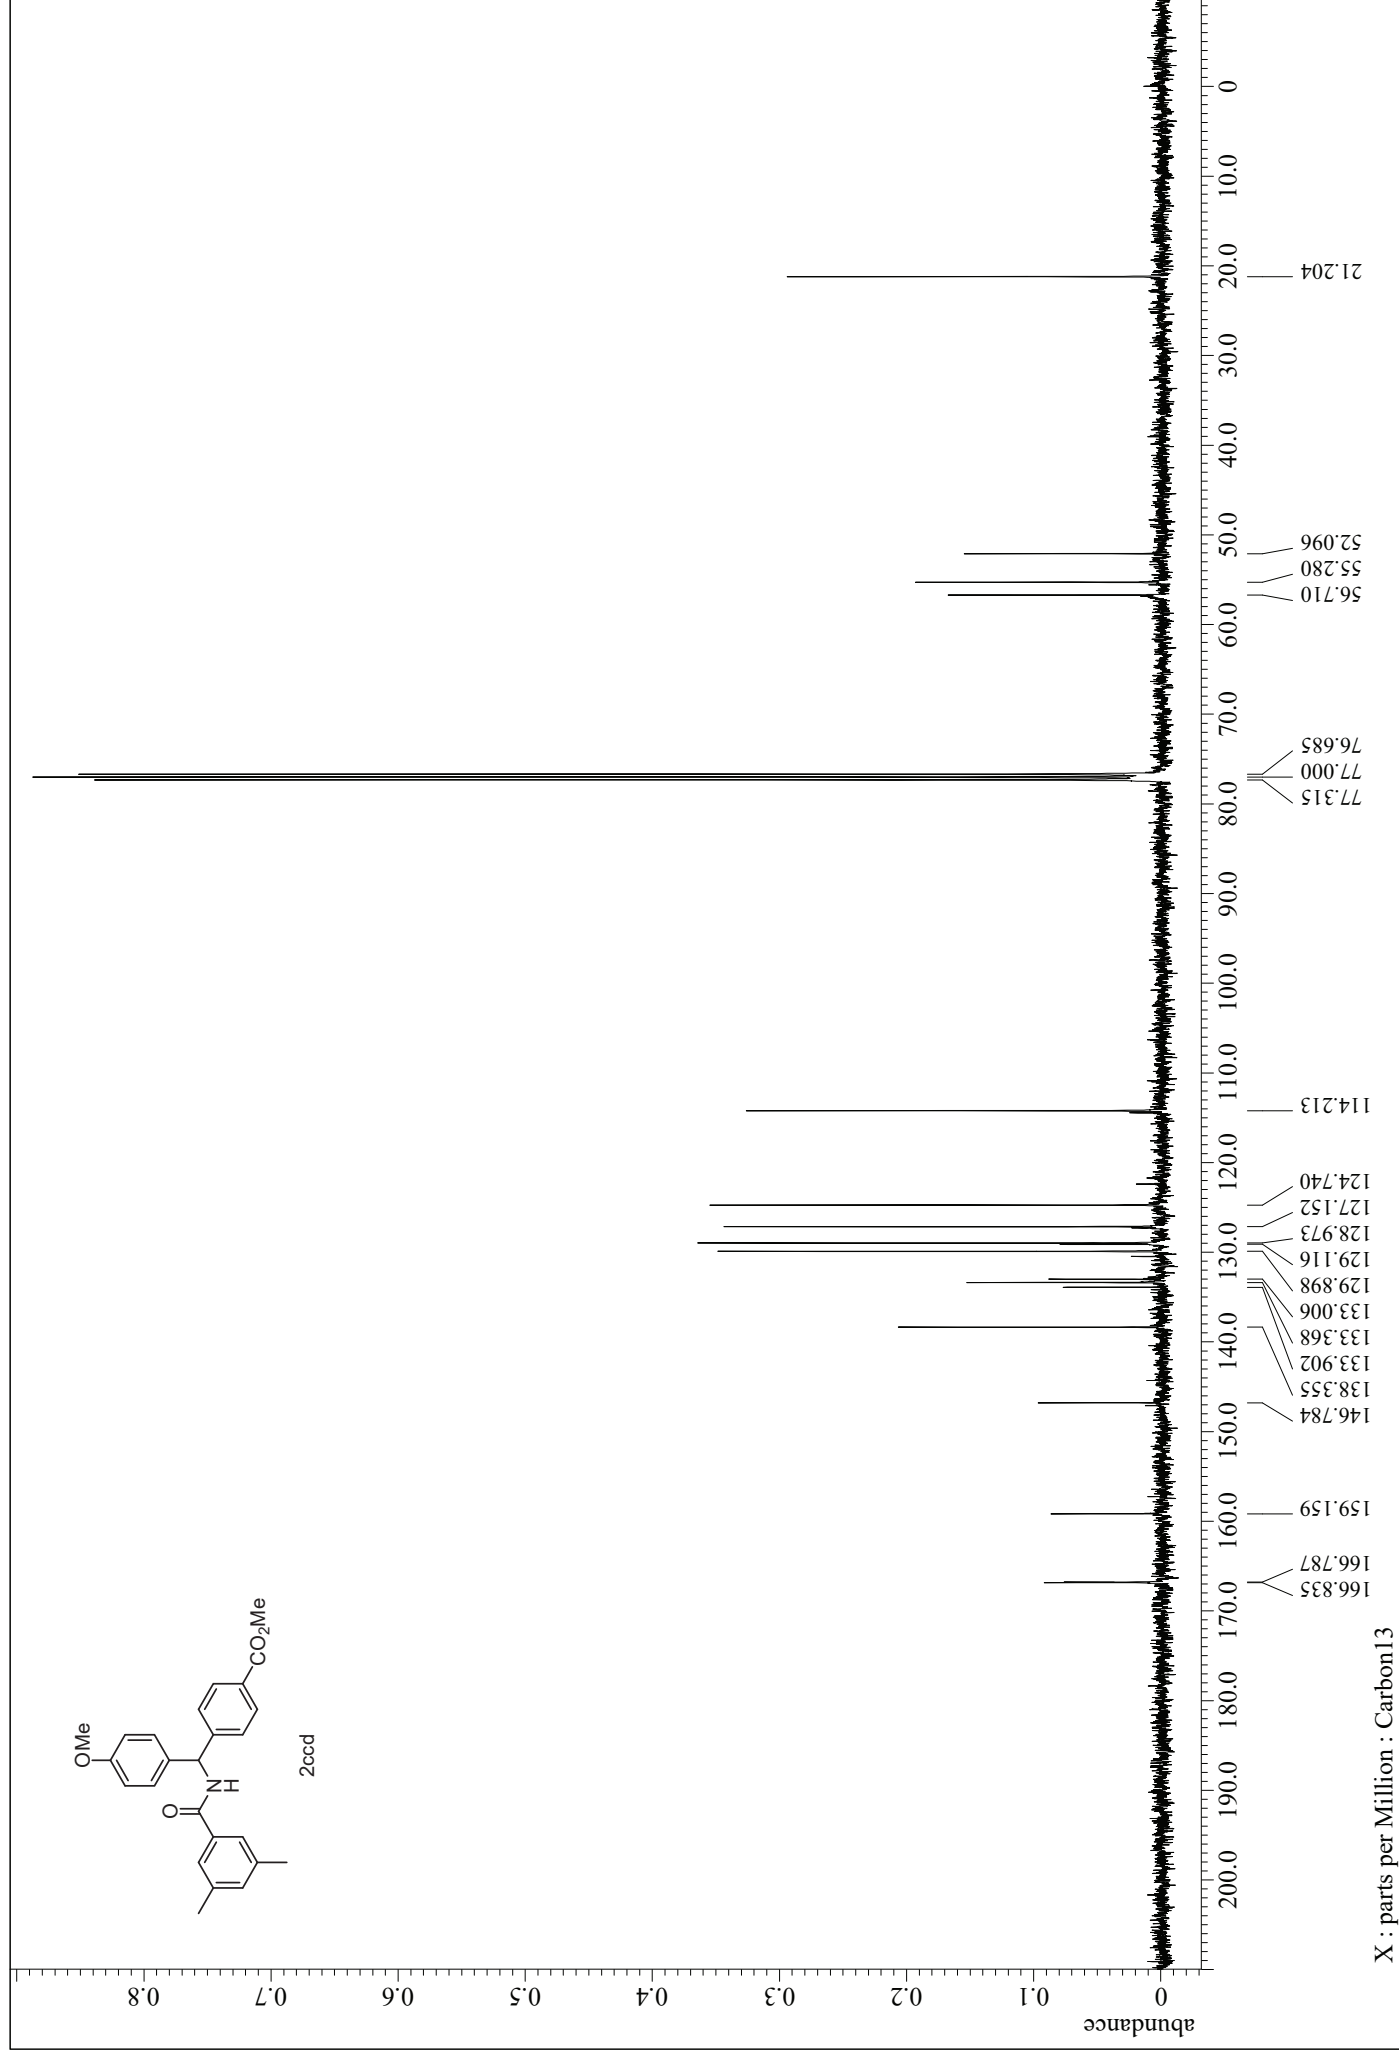

X : parts per Million : Carbon 13

<sup>1</sup>H NMR (400 MHz, CDCl<sub>3</sub>)

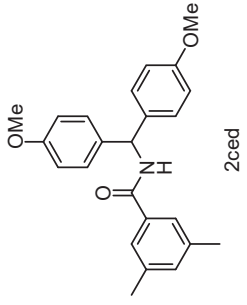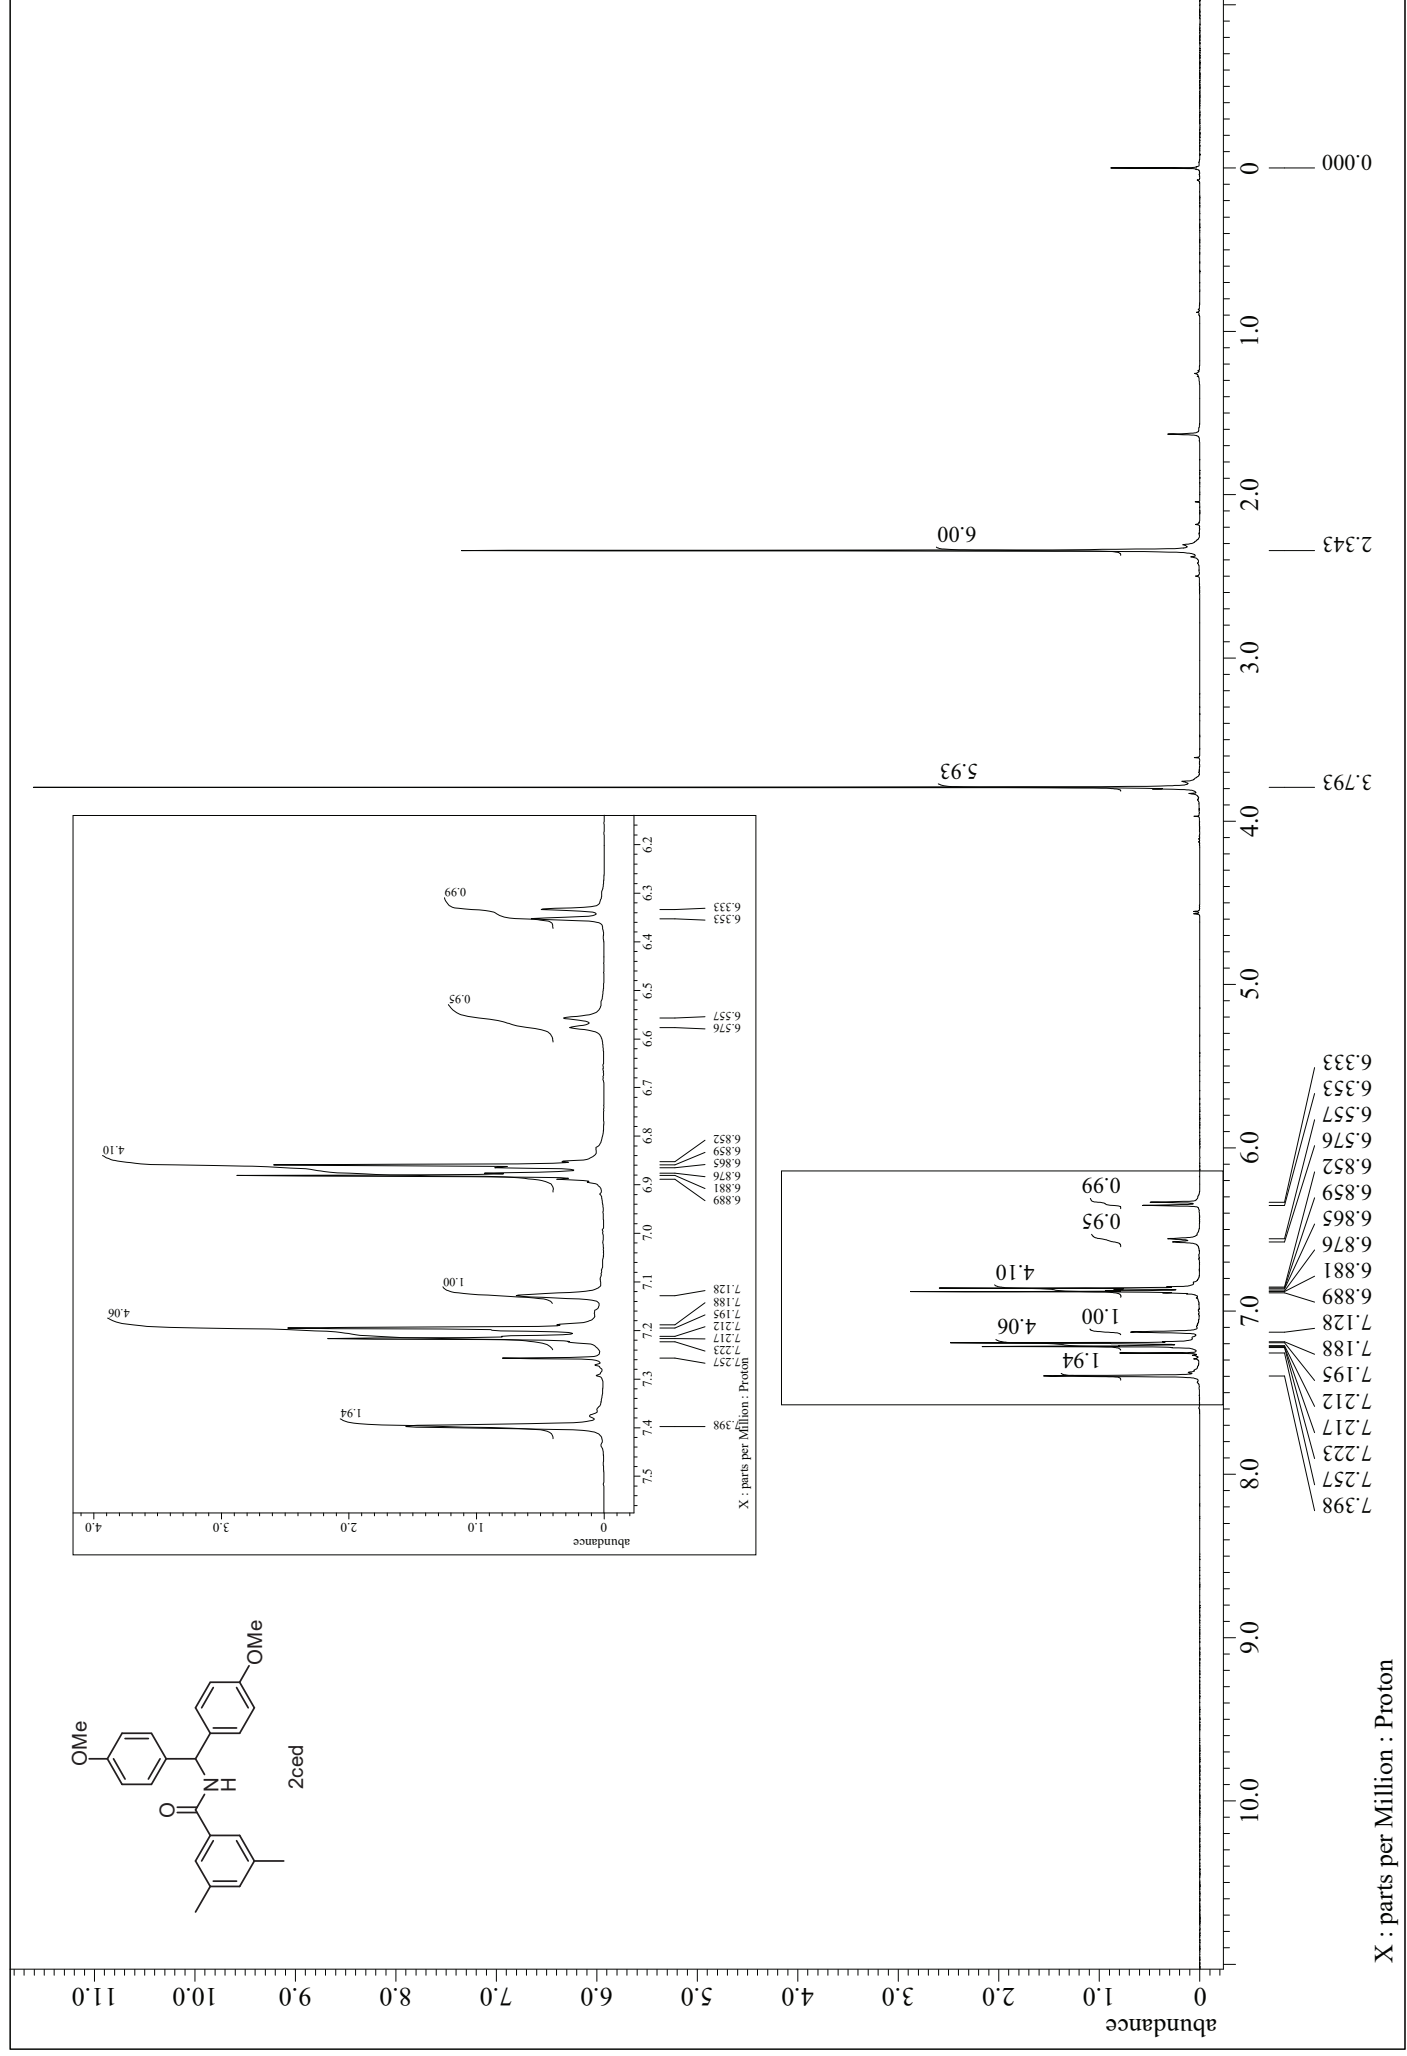



<sup>13</sup>C NMR (101 MHz, CDCl<sub>3</sub>)

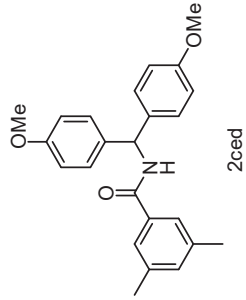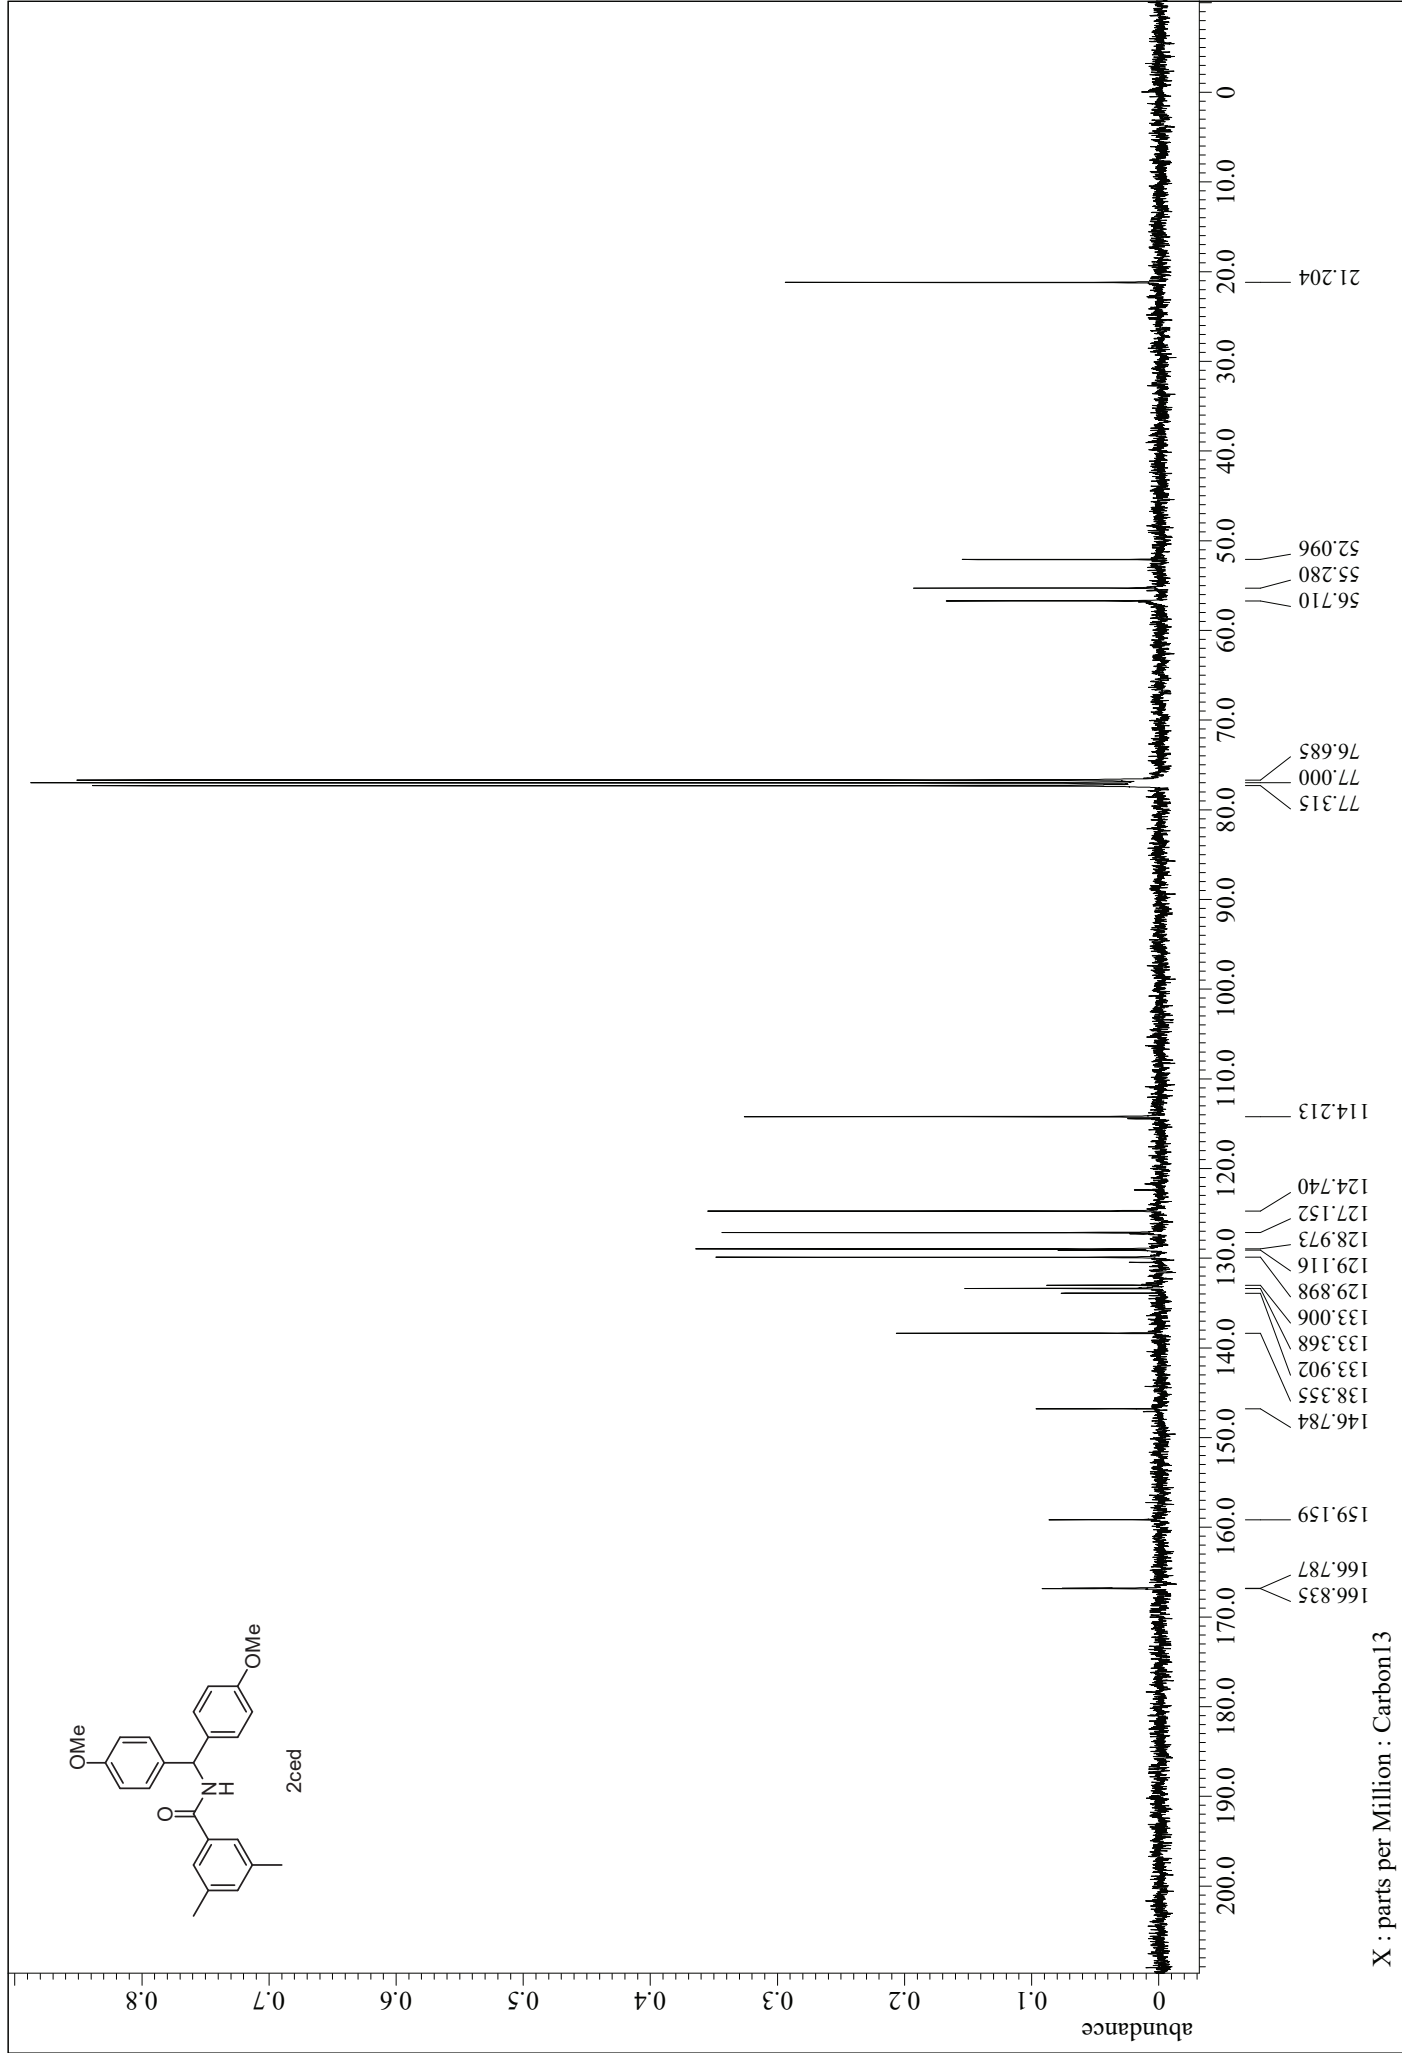

<sup>1</sup>H NMR (400 MHz, CDCl<sub>3</sub>)

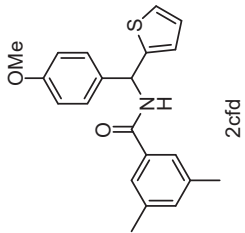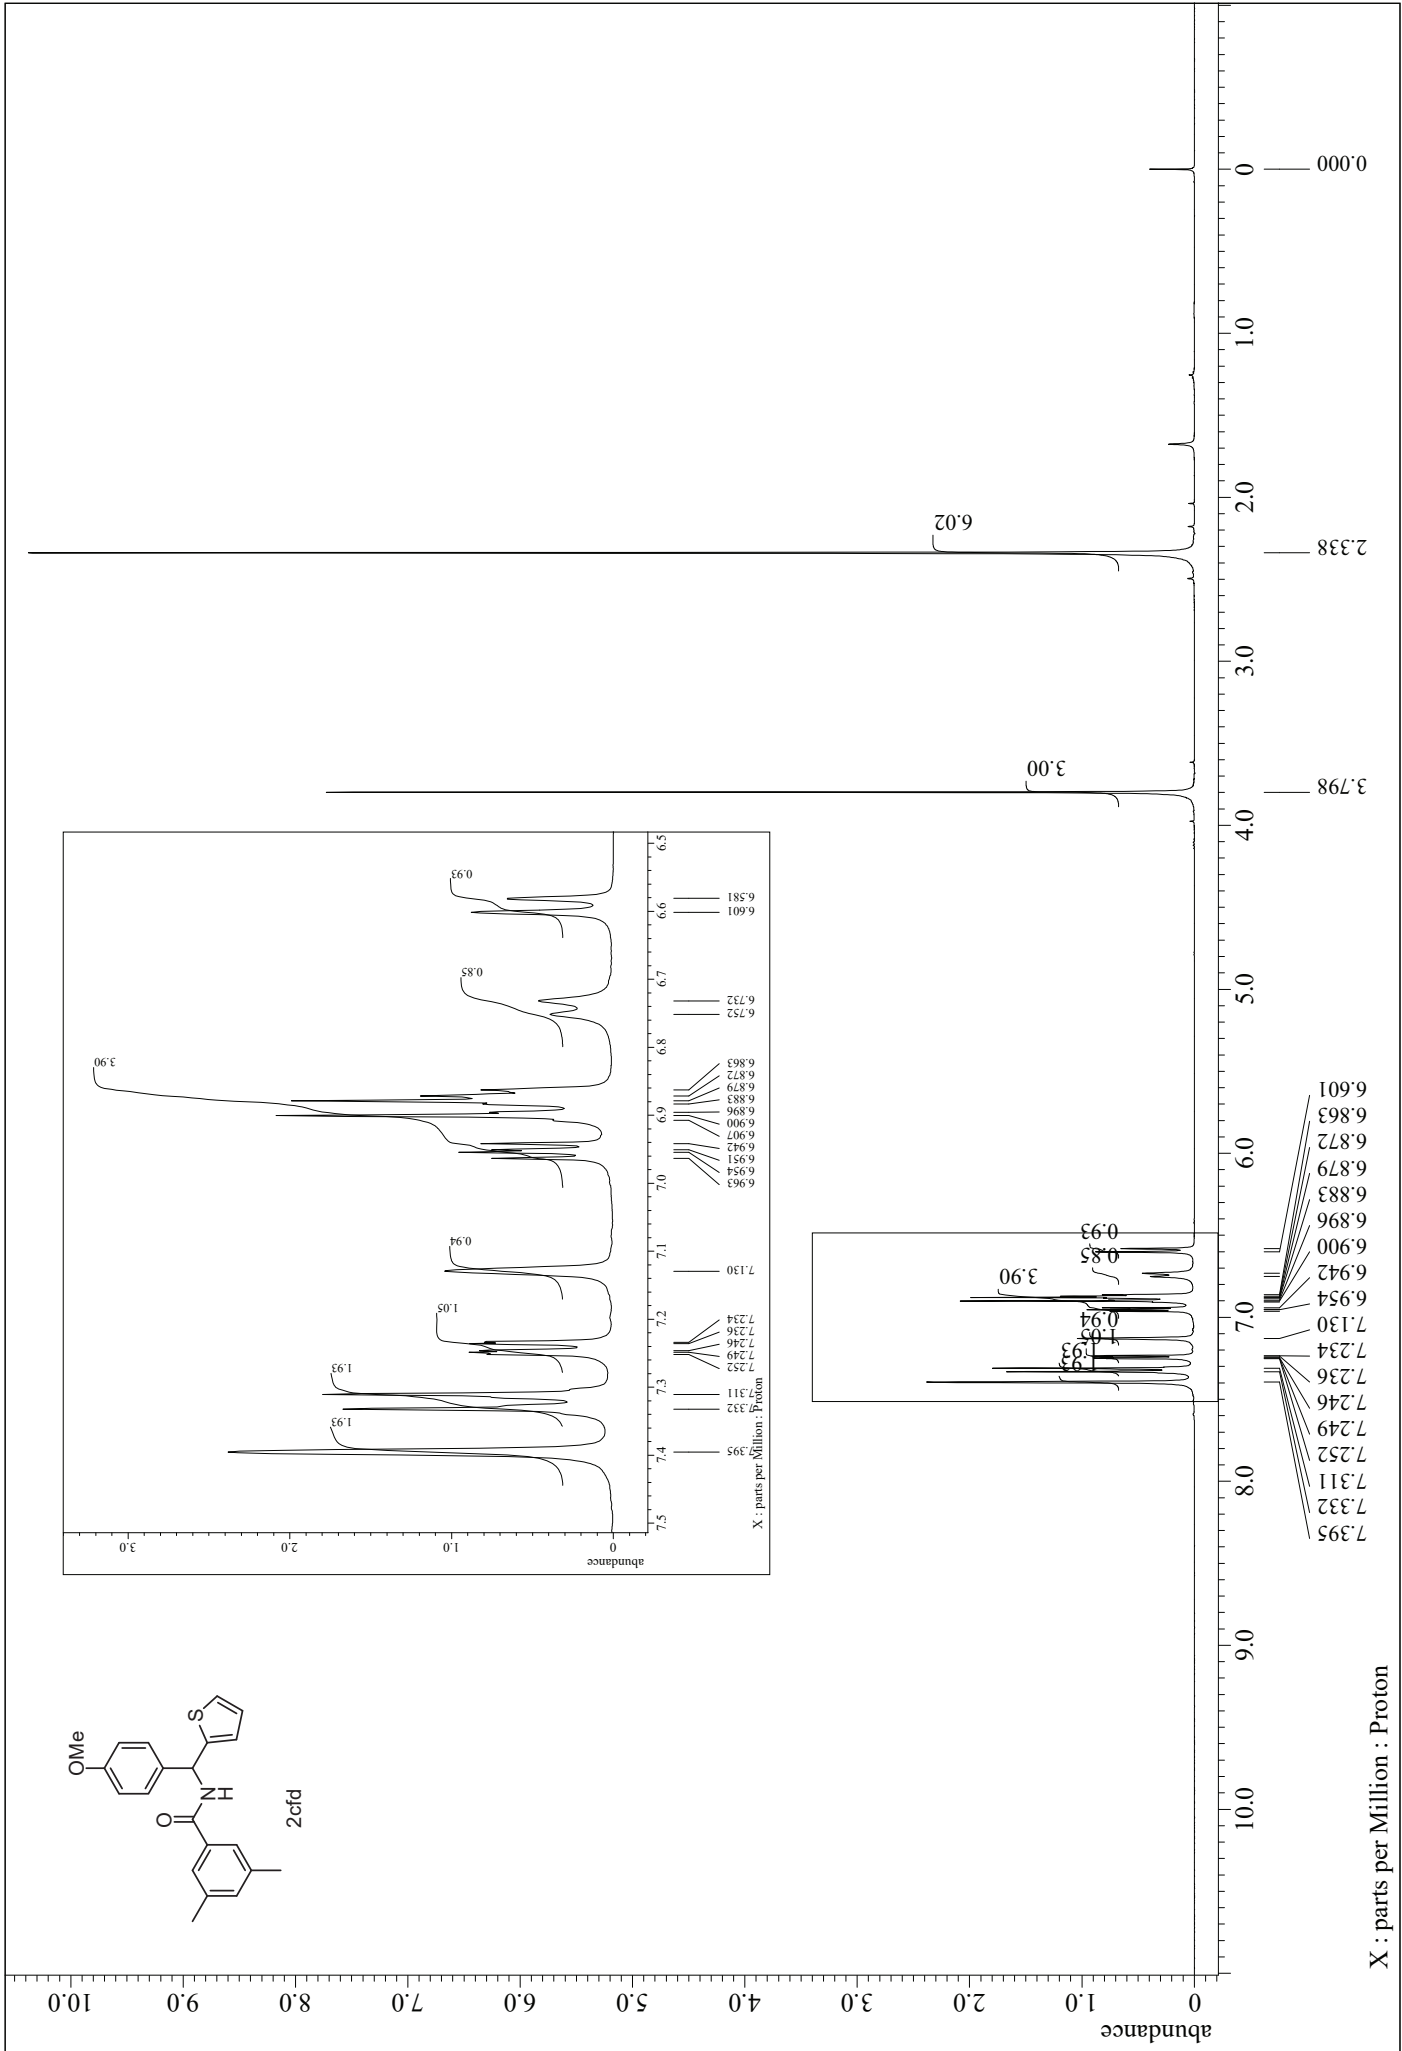

X : parts per Million : Proton

<sup>13</sup>C NMR (101 MHz, CDCl<sub>3</sub>)

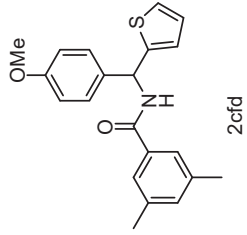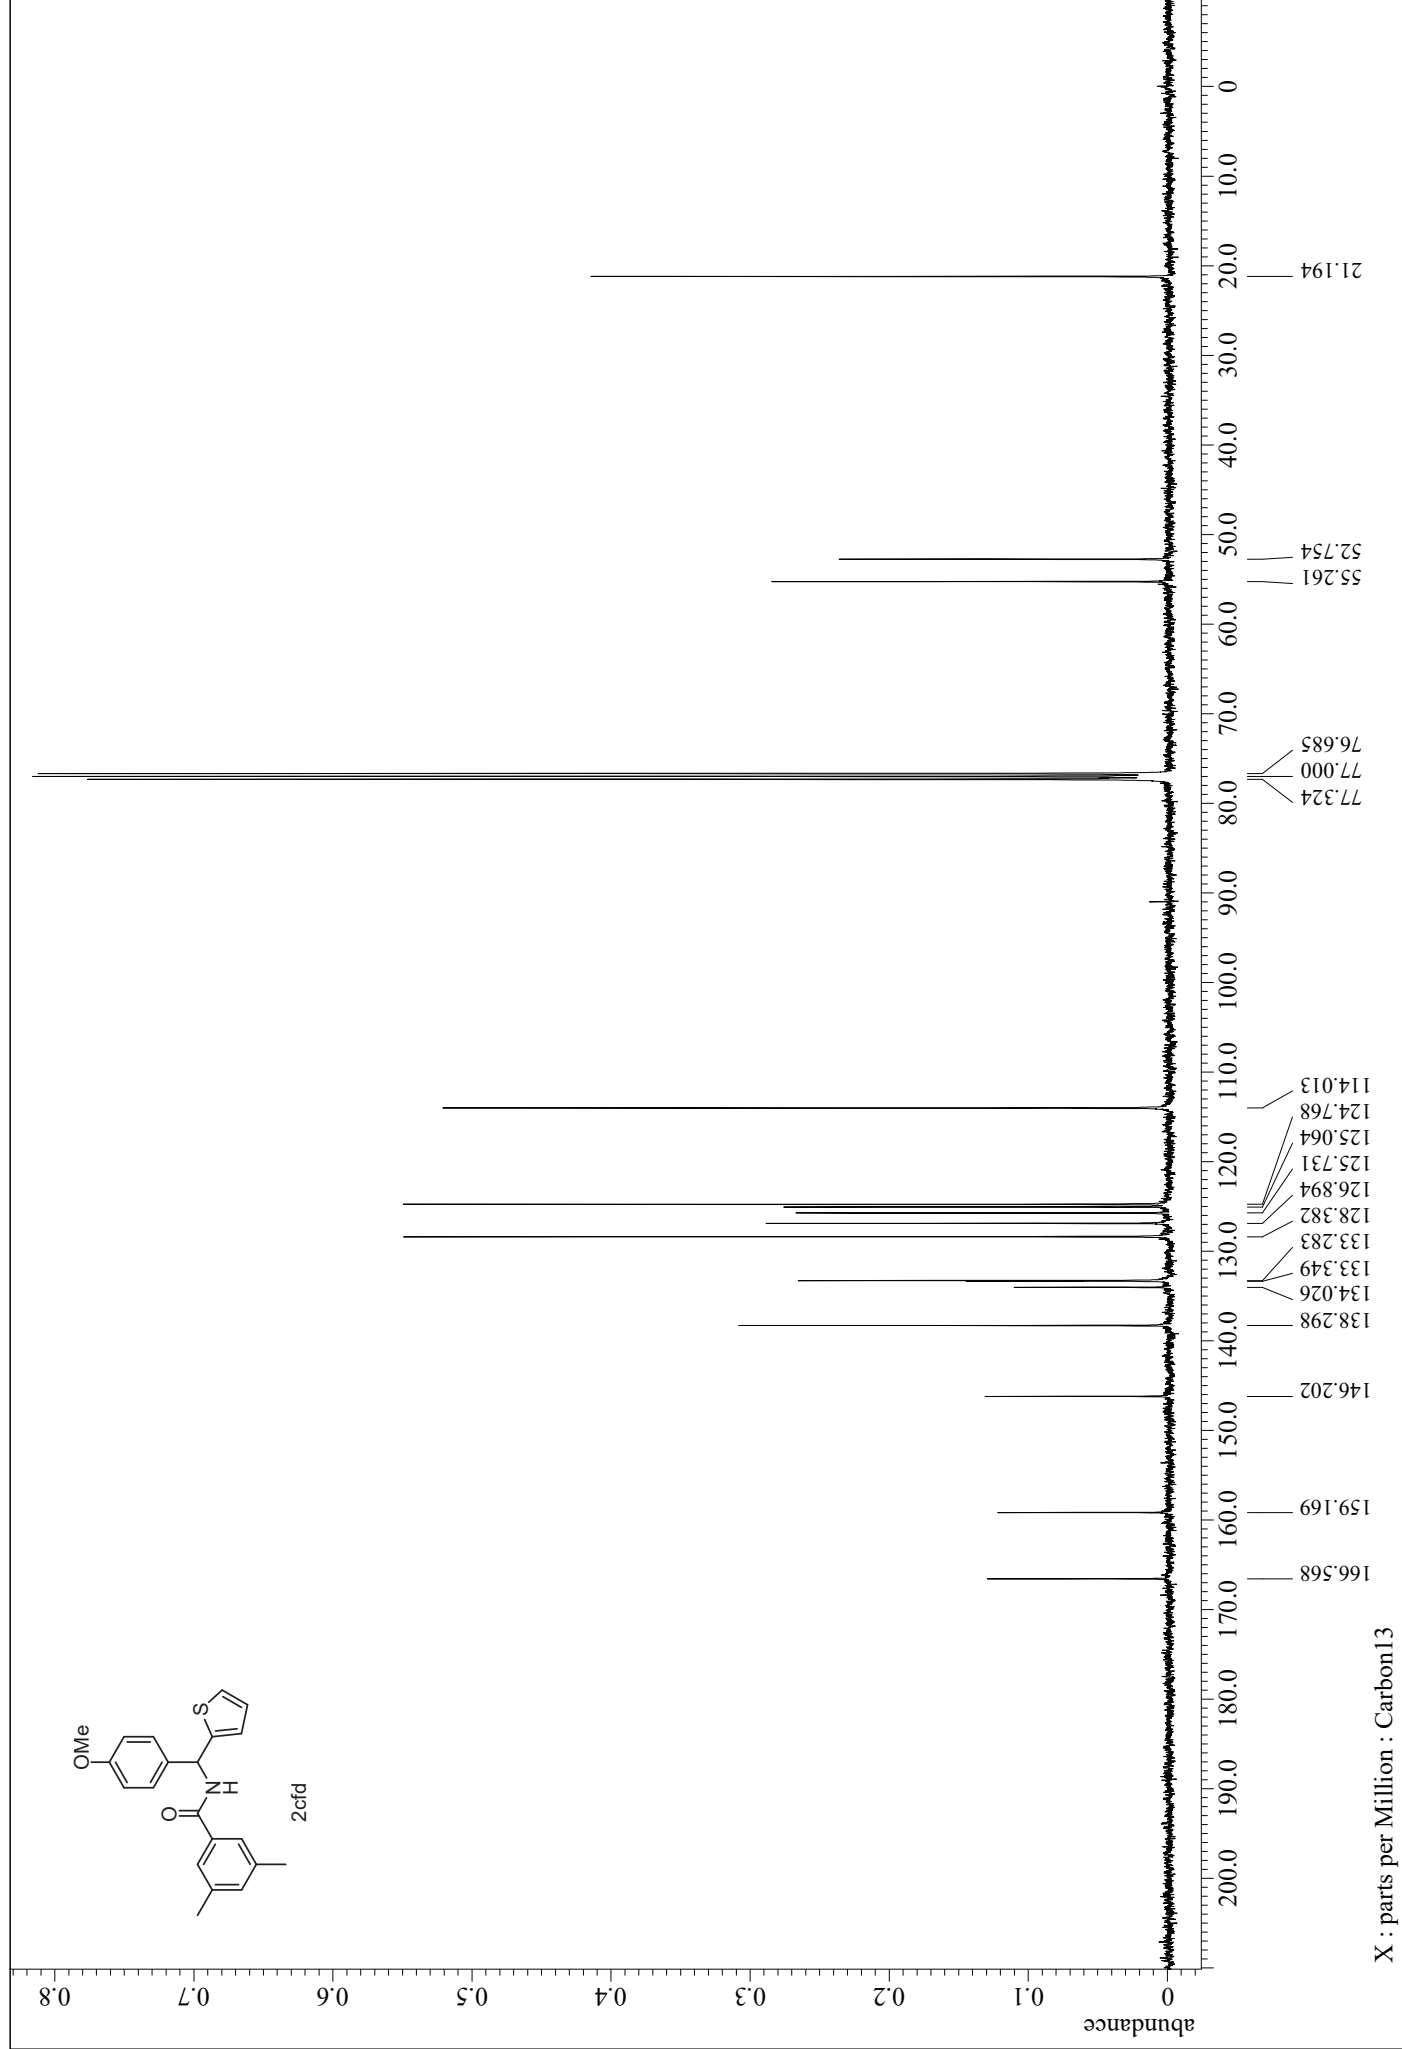

X : parts per Million : Carbon 13

$^1\text{H}$  NMR (400 MHz,  $\text{CDCl}_3$ )

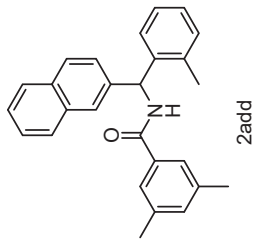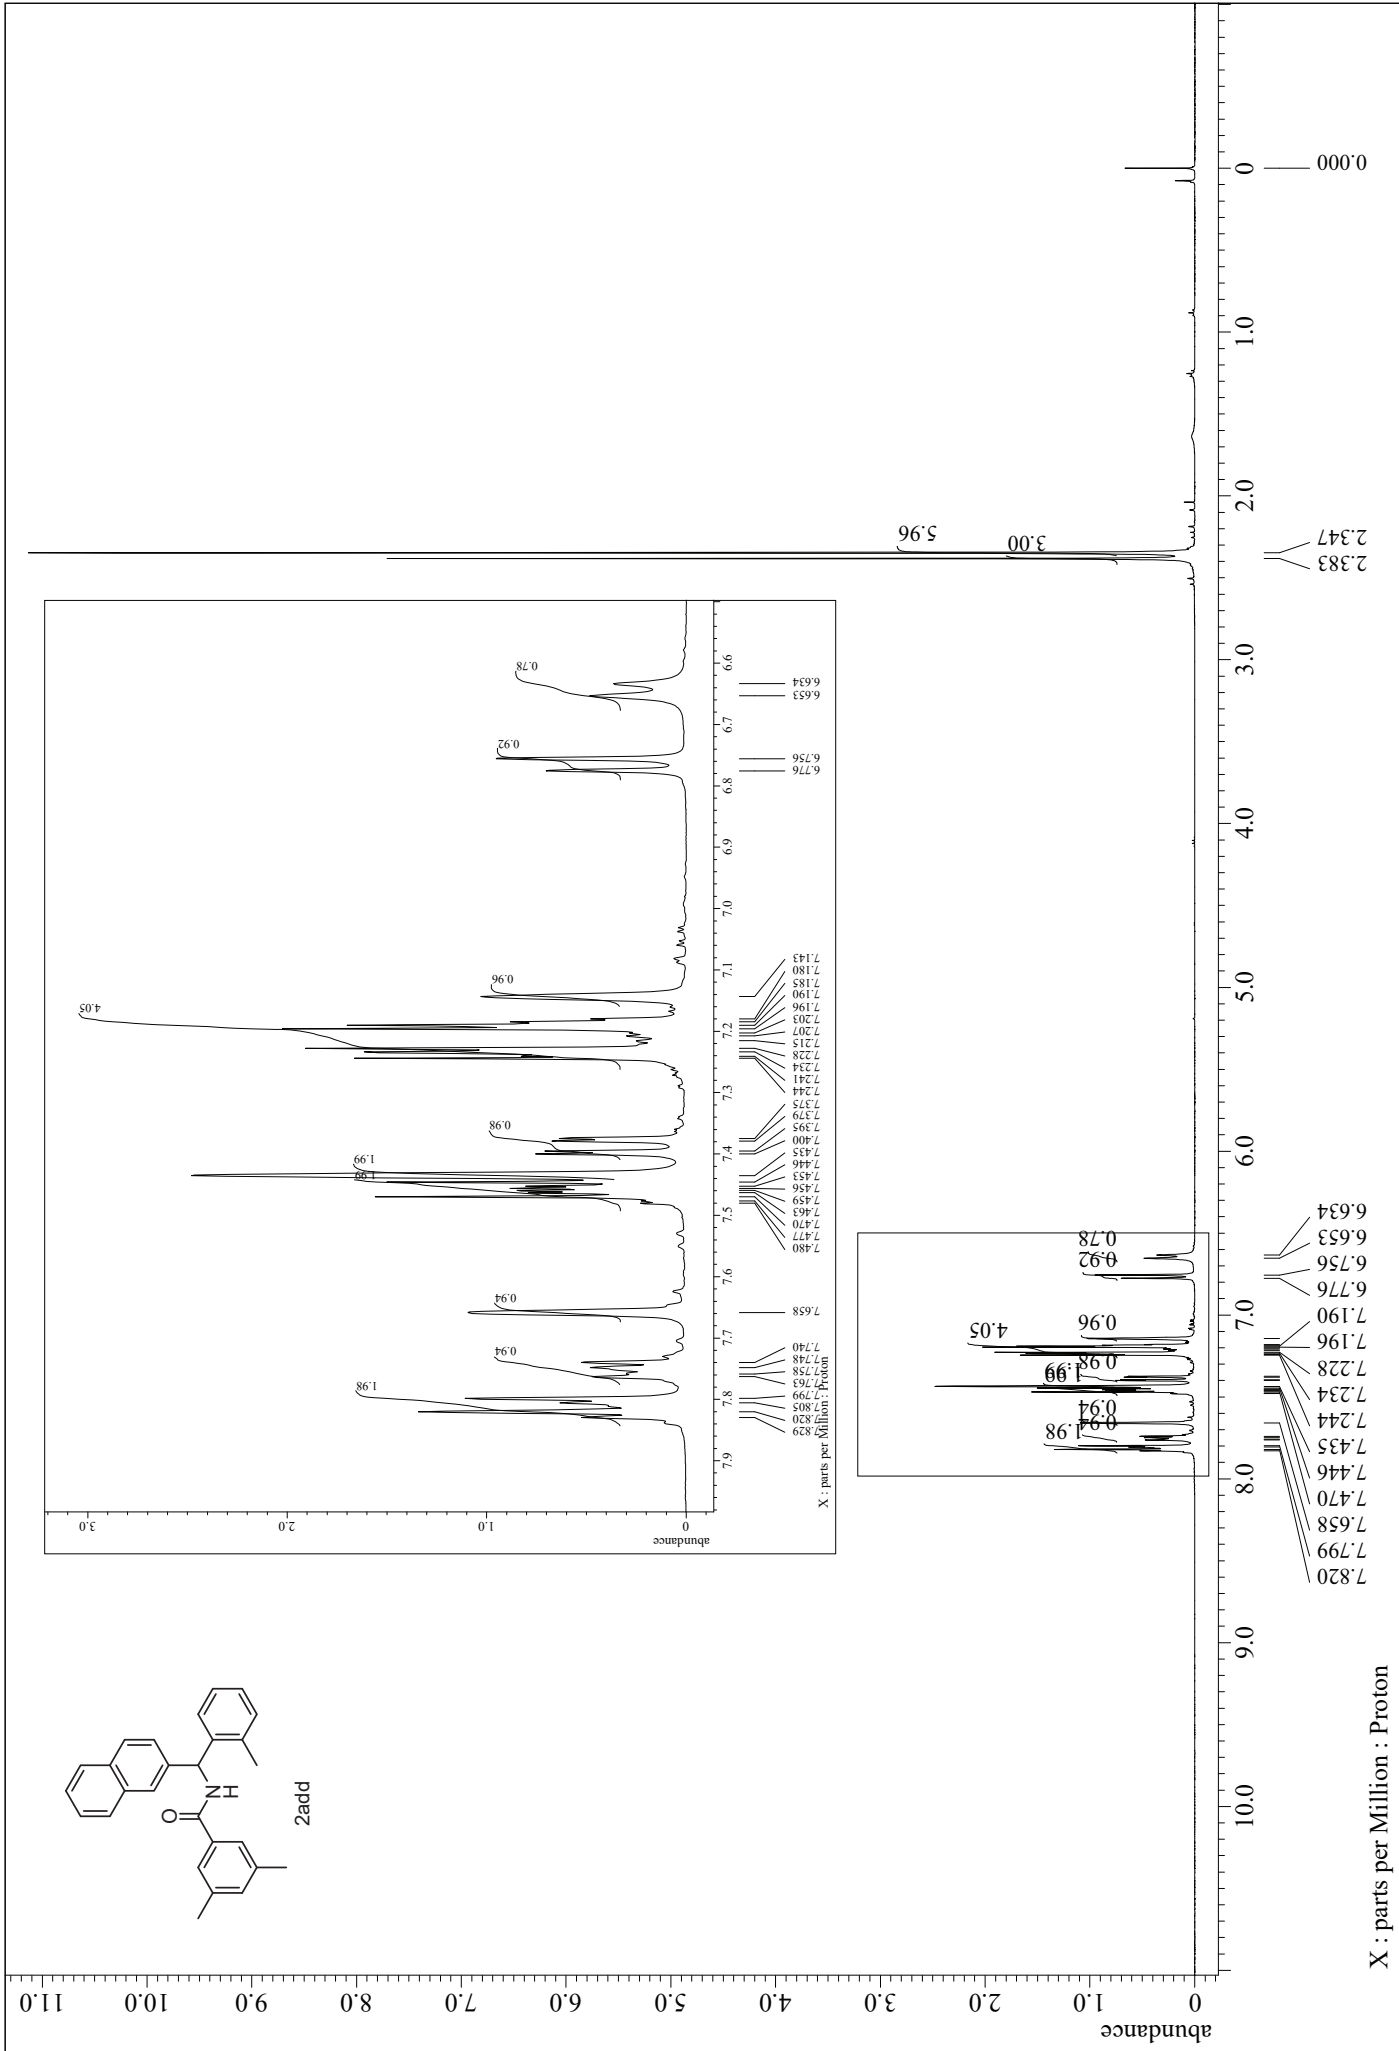

<sup>13</sup>C NMR (101 MHz, CDCl<sub>3</sub>)

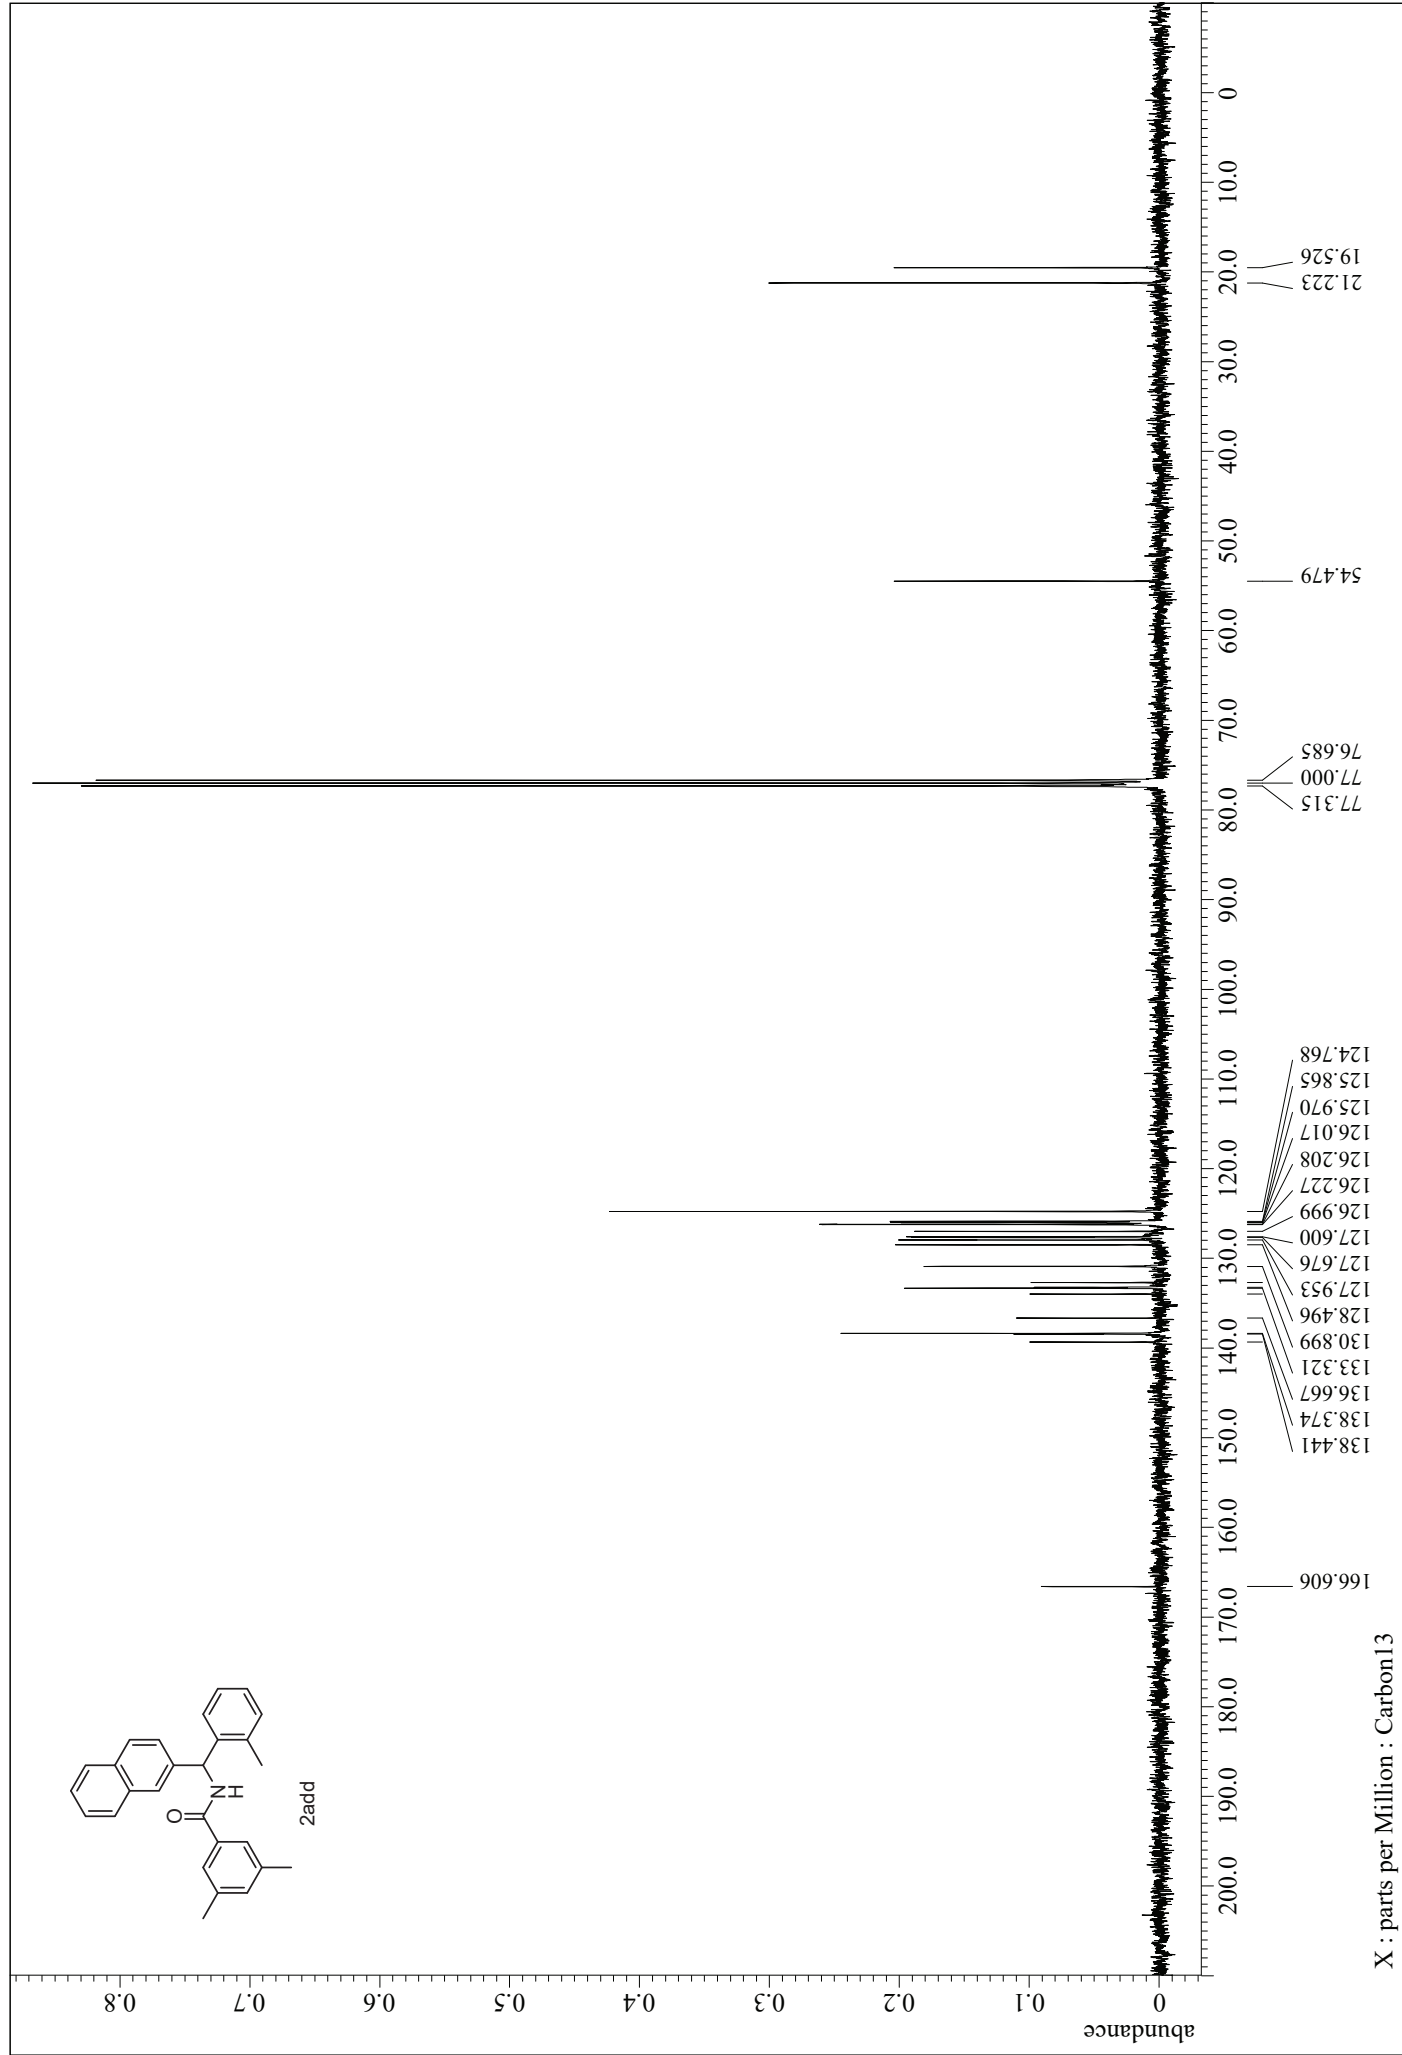

<sup>1</sup>H NMR (400 MHz, CDCl<sub>3</sub>)

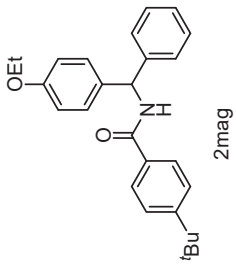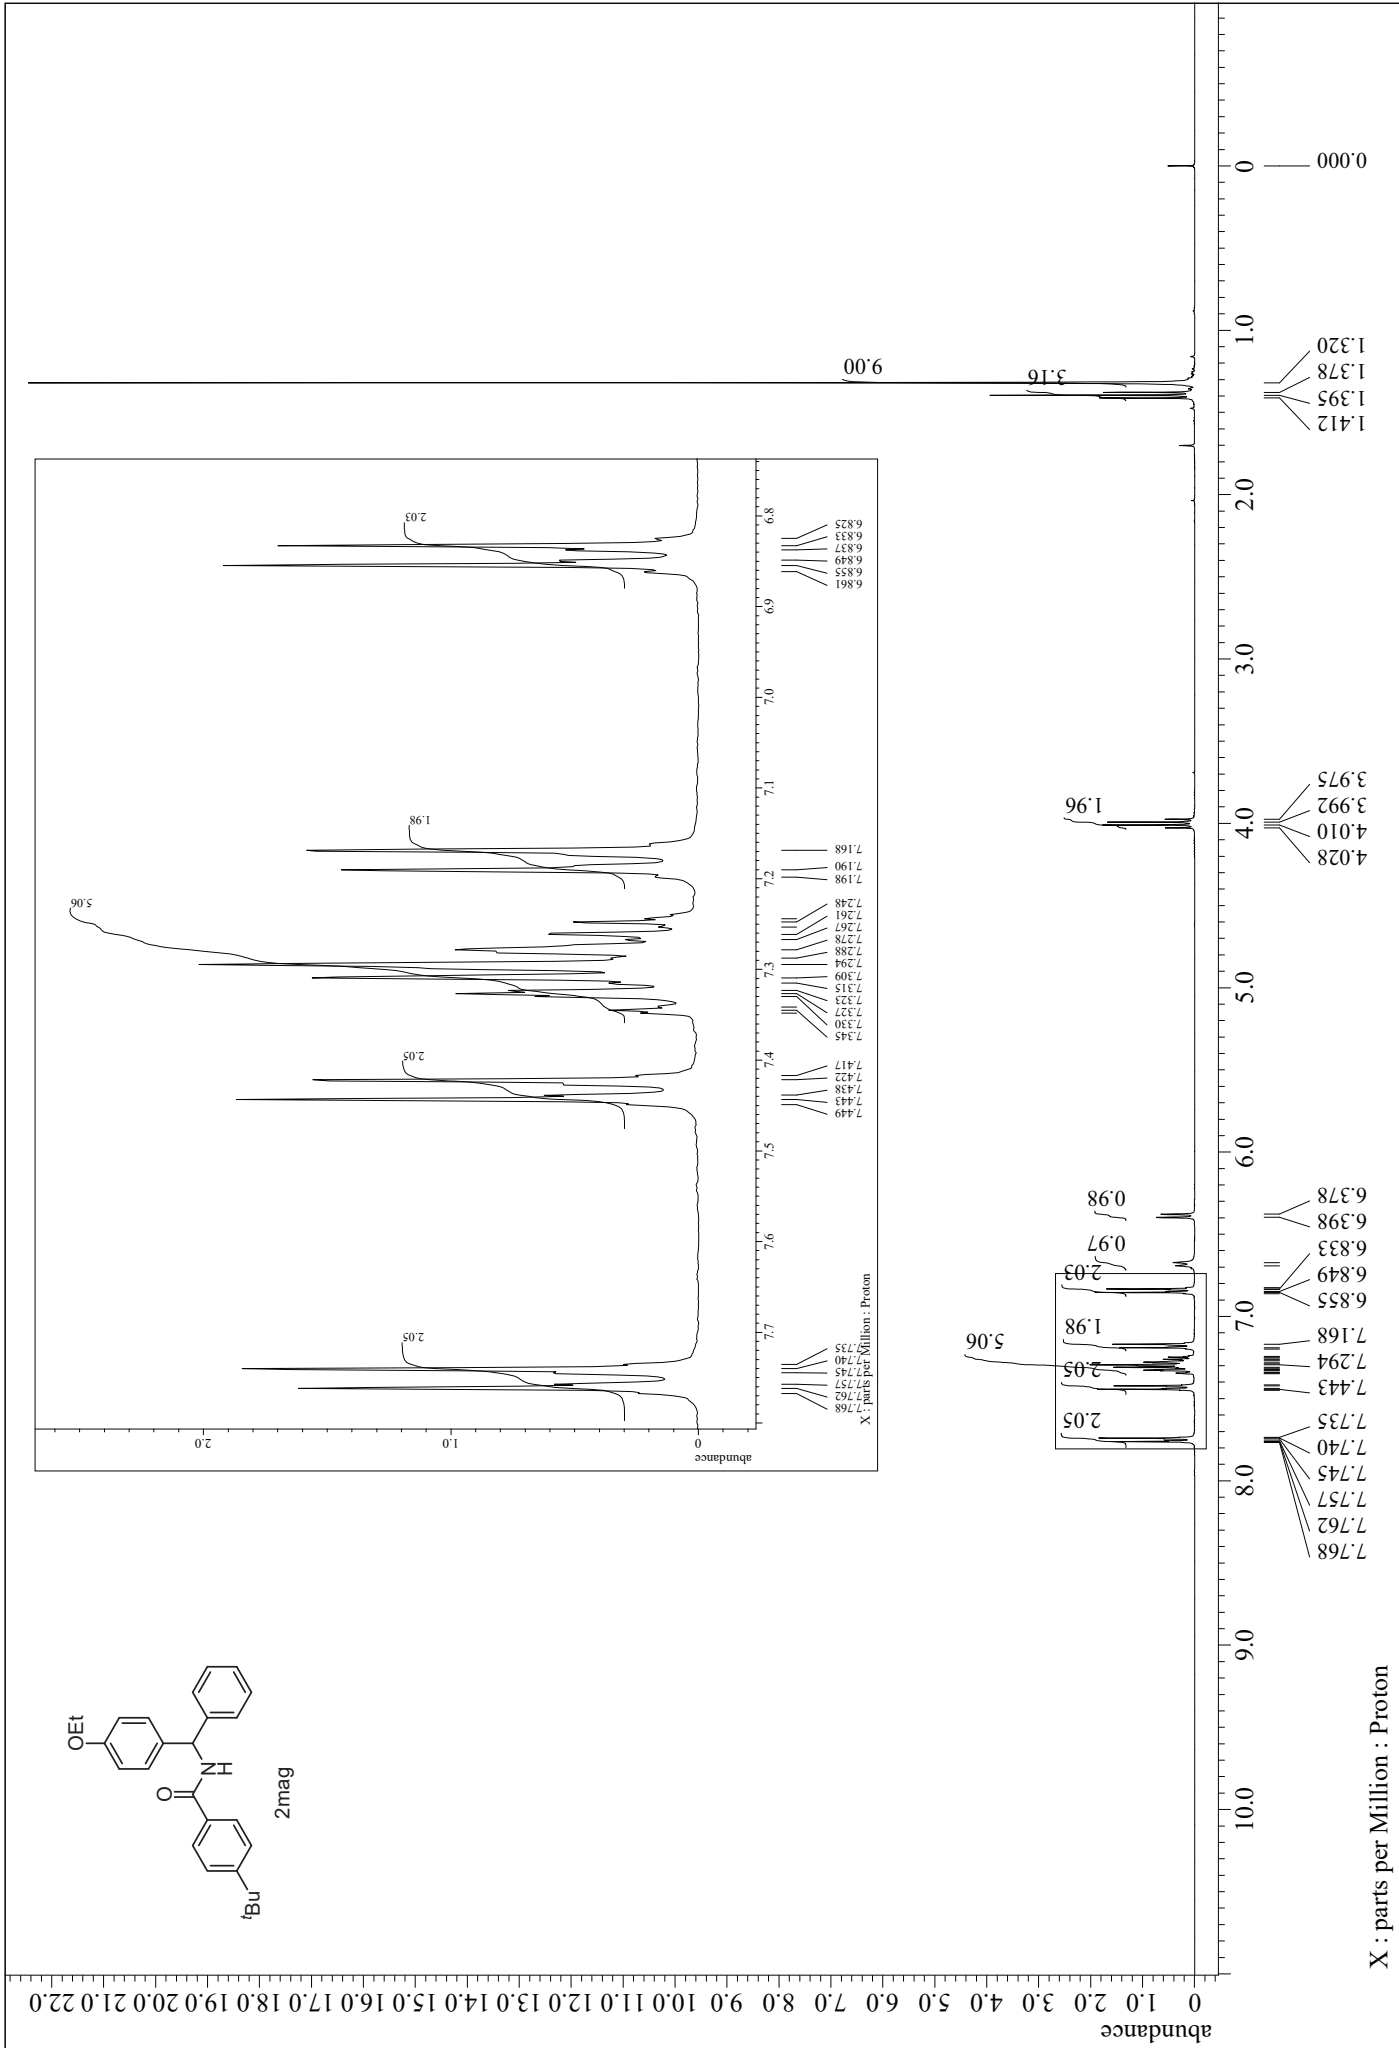

<sup>13</sup>C NMR (101 MHz, CDCl<sub>3</sub>)

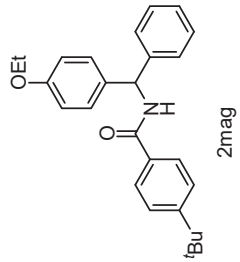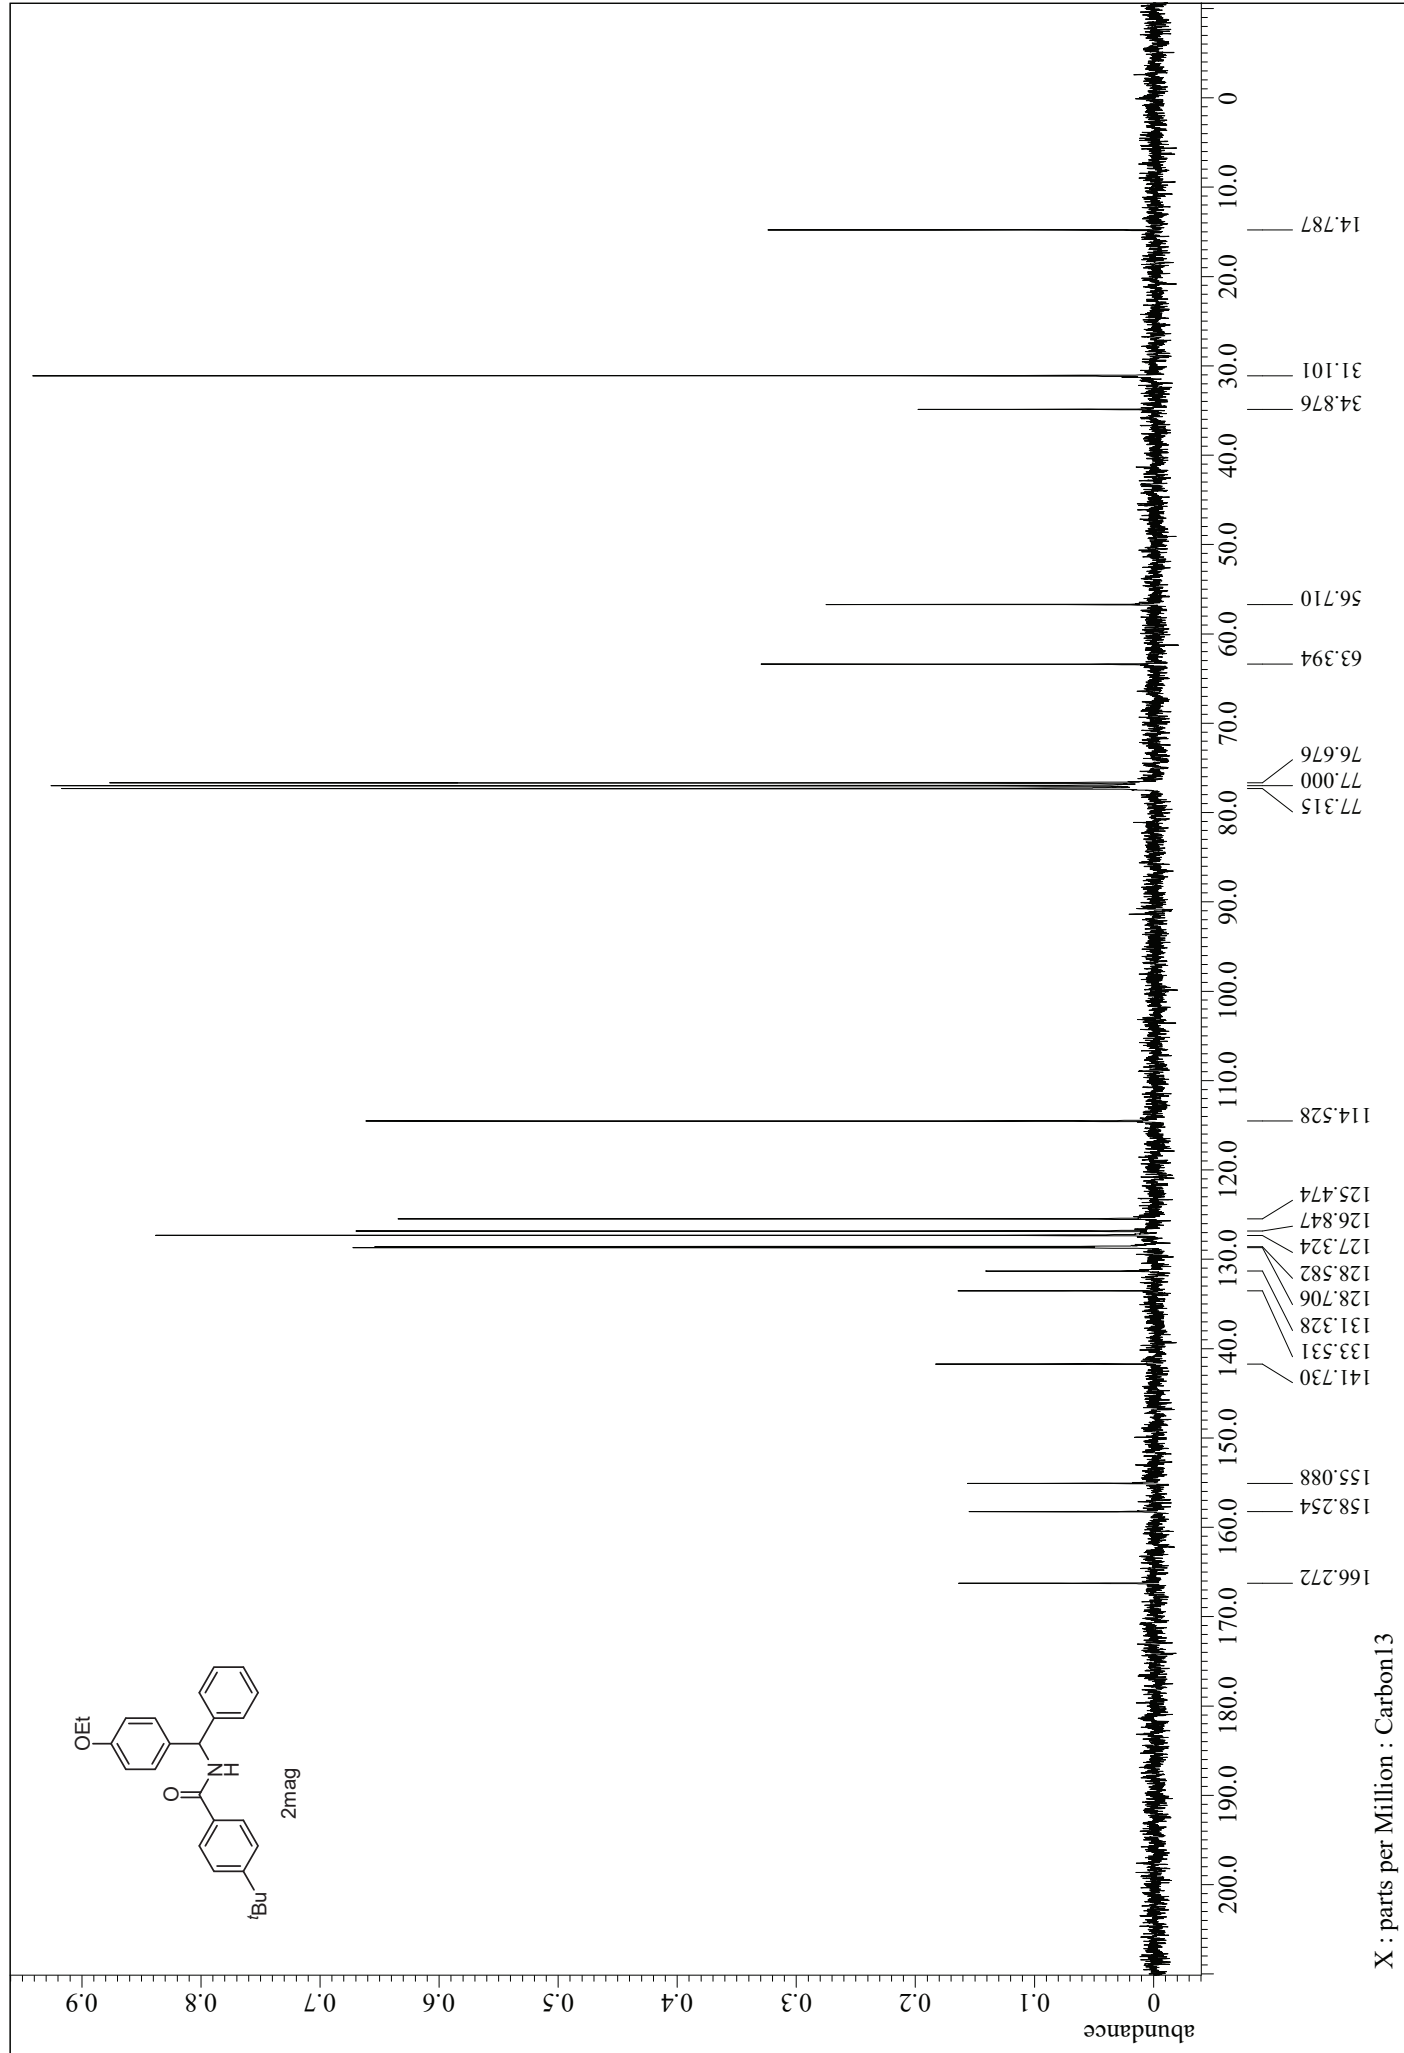

X : parts per Million : Carbon13

<sup>1</sup>H NMR (400 MHz, CDCl<sub>3</sub>)

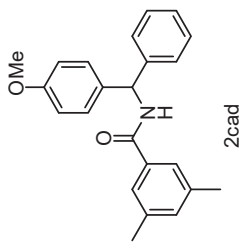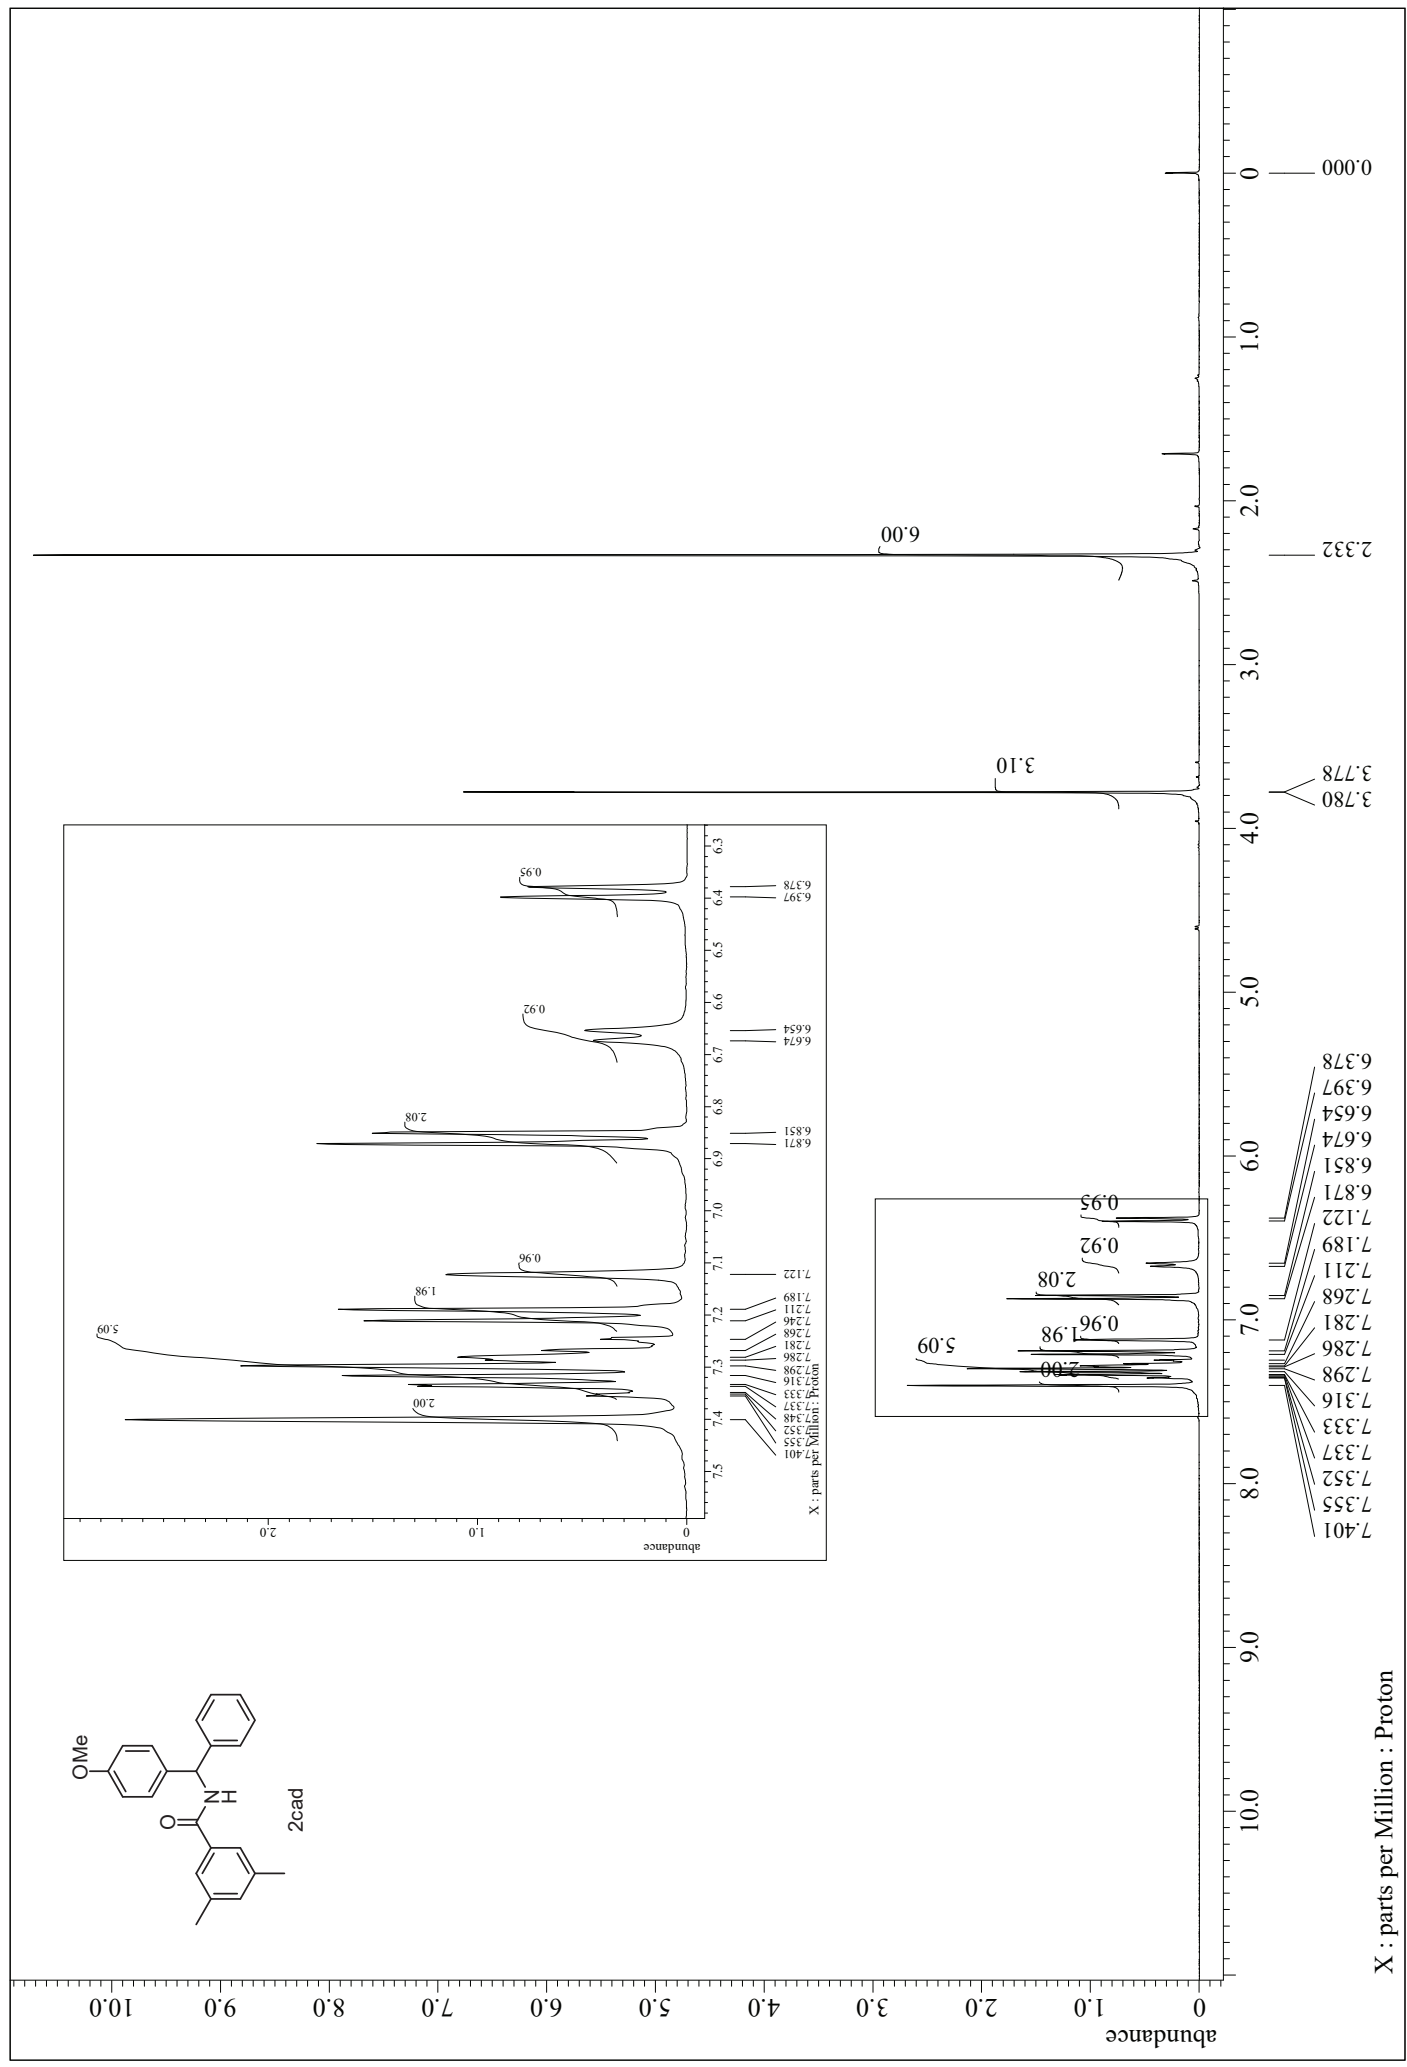

X : parts per Million : Proton



<sup>13</sup>C NMR (101 MHz, CDCl<sub>3</sub>)

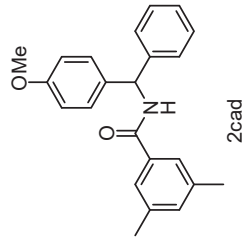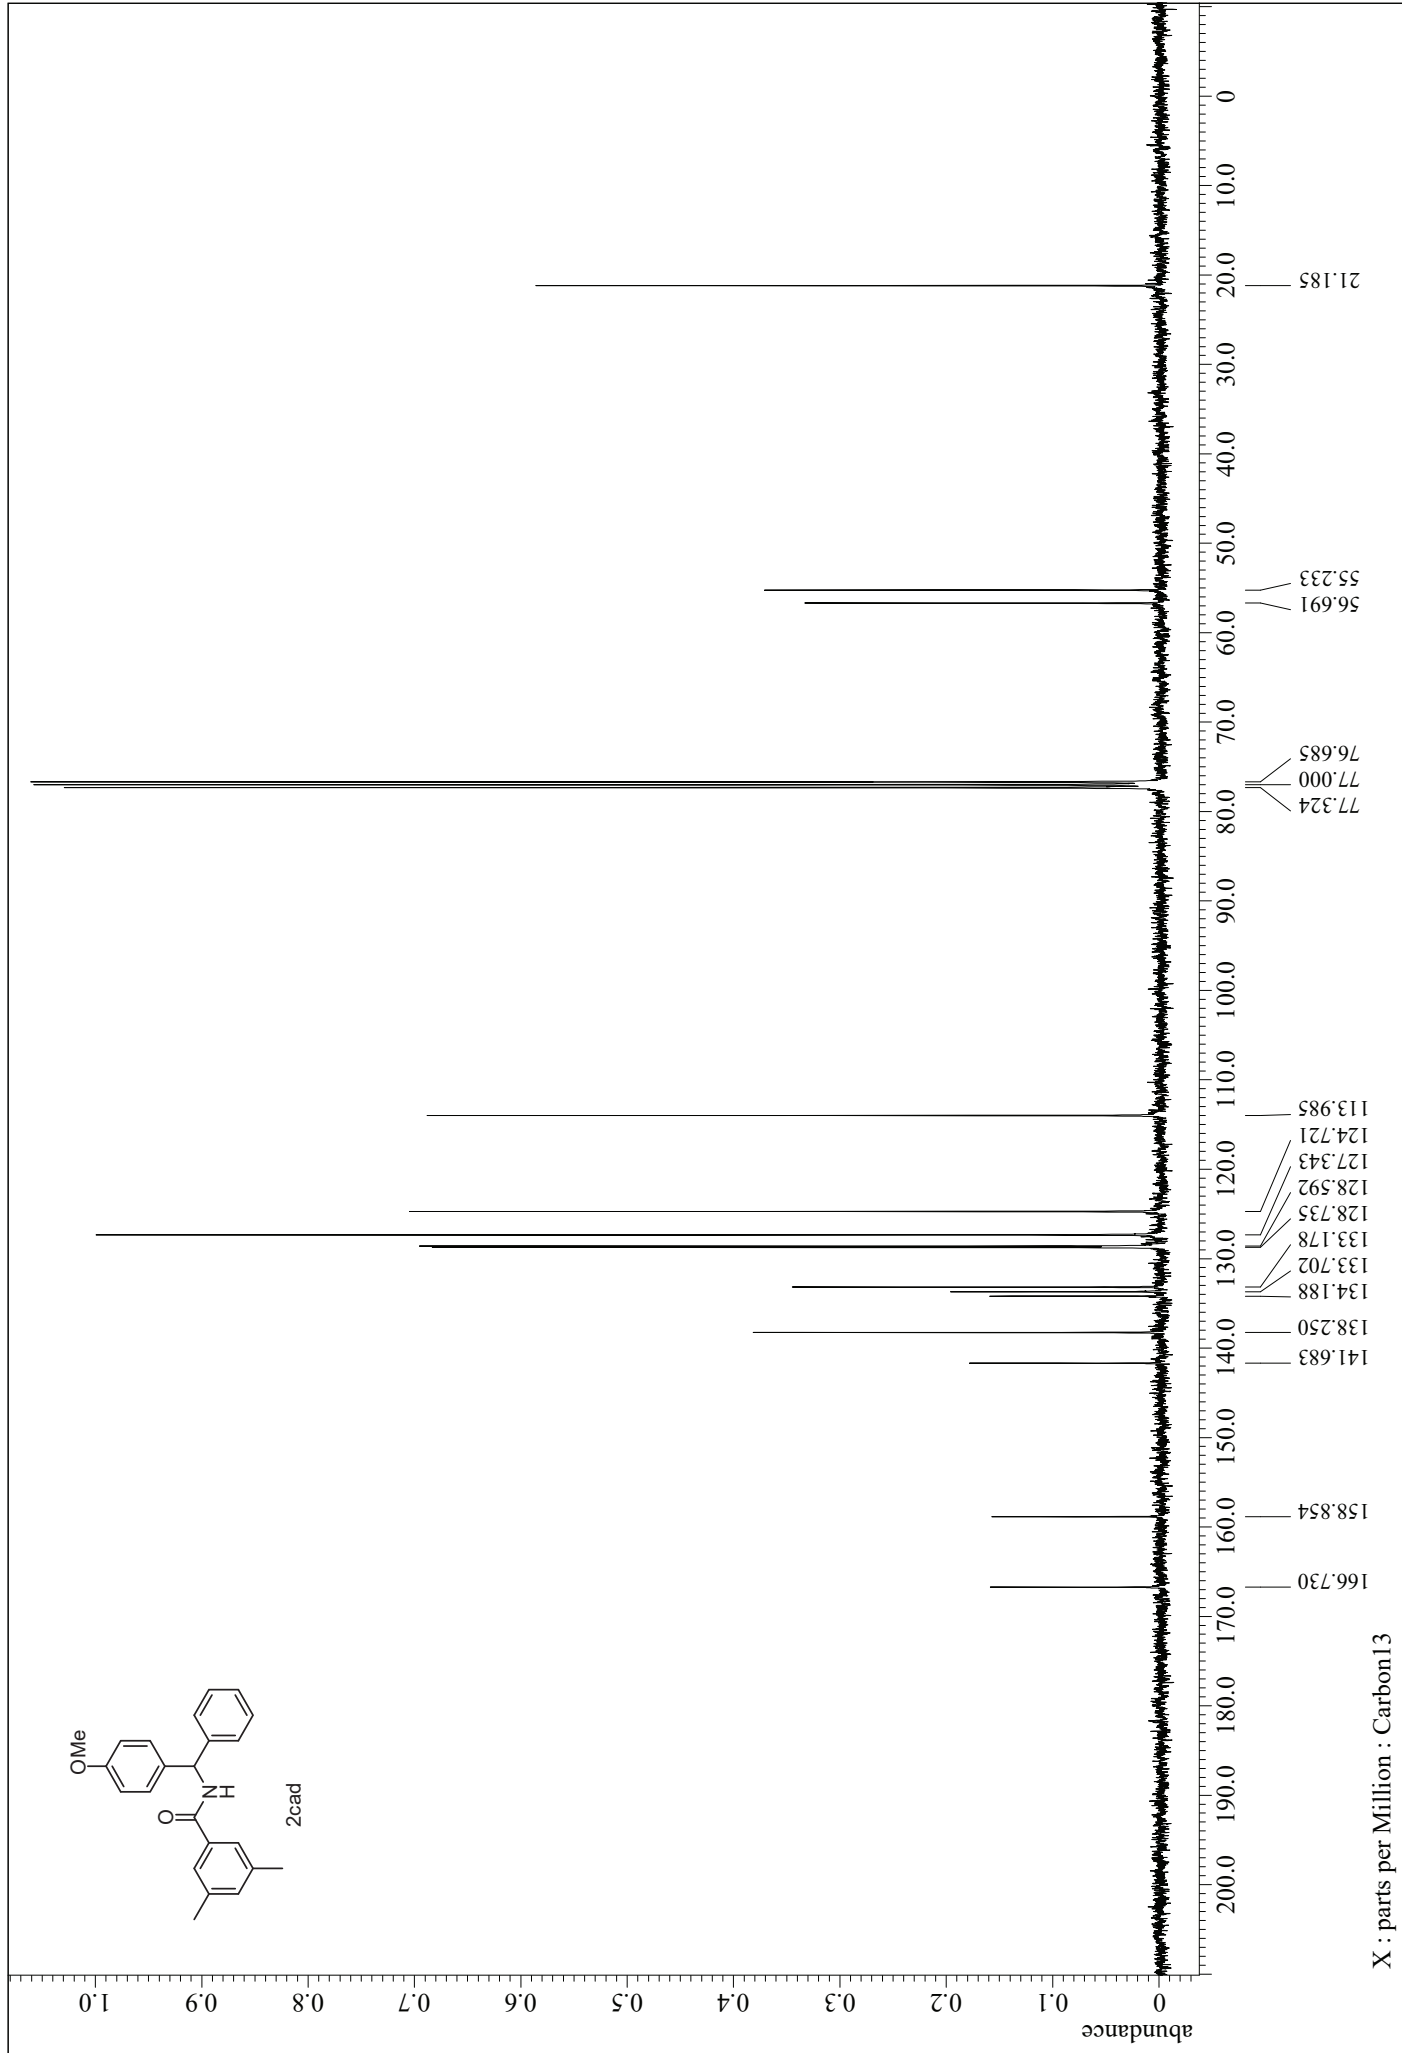

X : parts per Million : Carbon13

<sup>1</sup>H NMR (400 MHz, CDCl<sub>3</sub>)

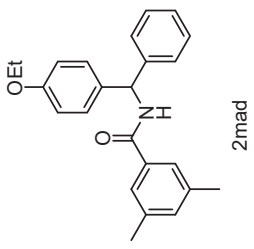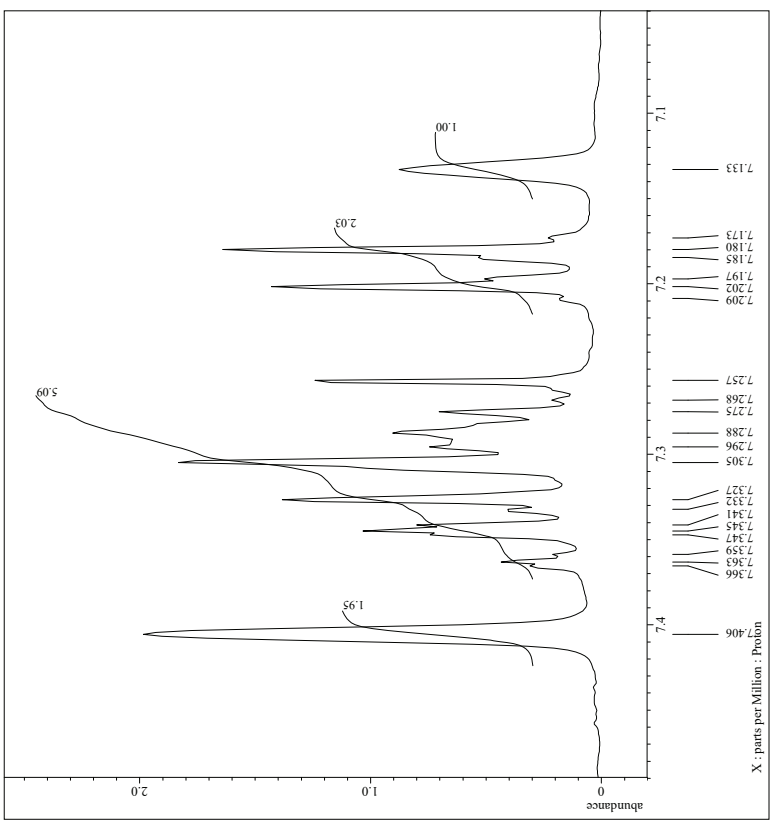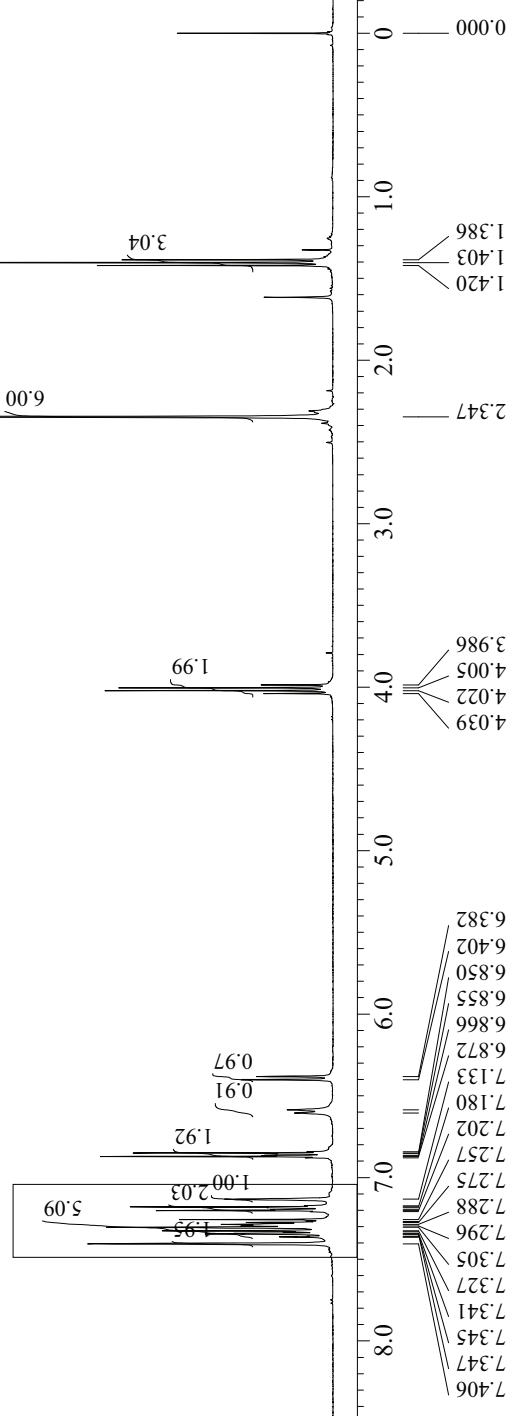

<sup>13</sup>C NMR (101 MHz, CDCl<sub>3</sub>)

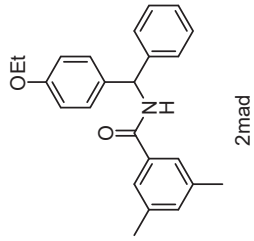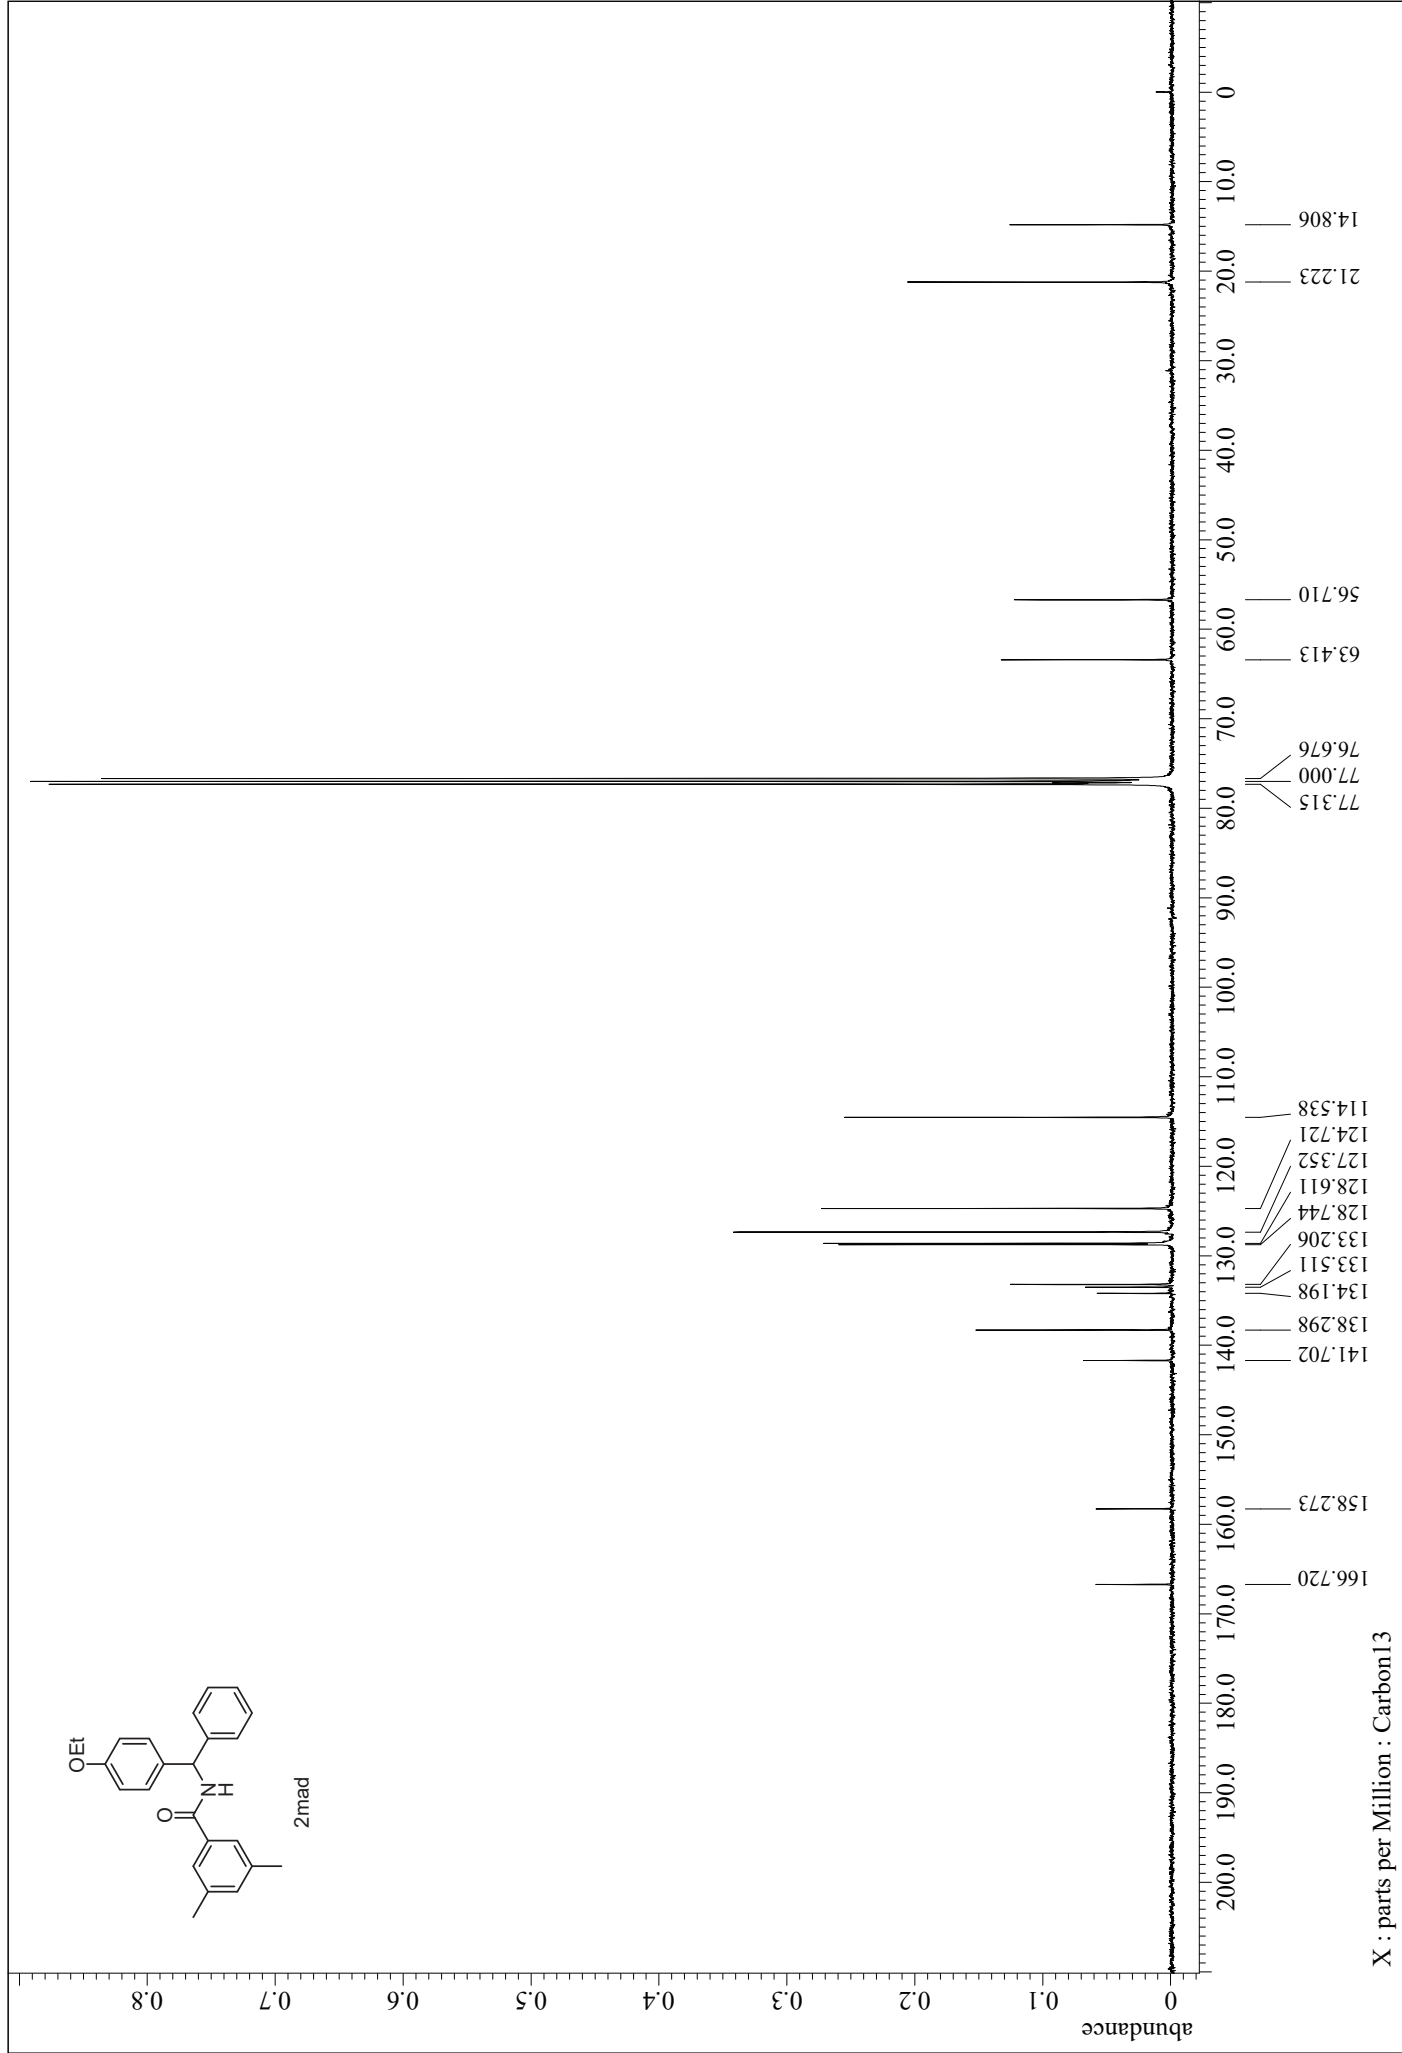

<sup>1</sup>H NMR (400 MHz, CDCl<sub>3</sub>)

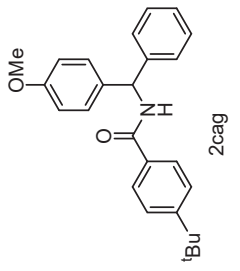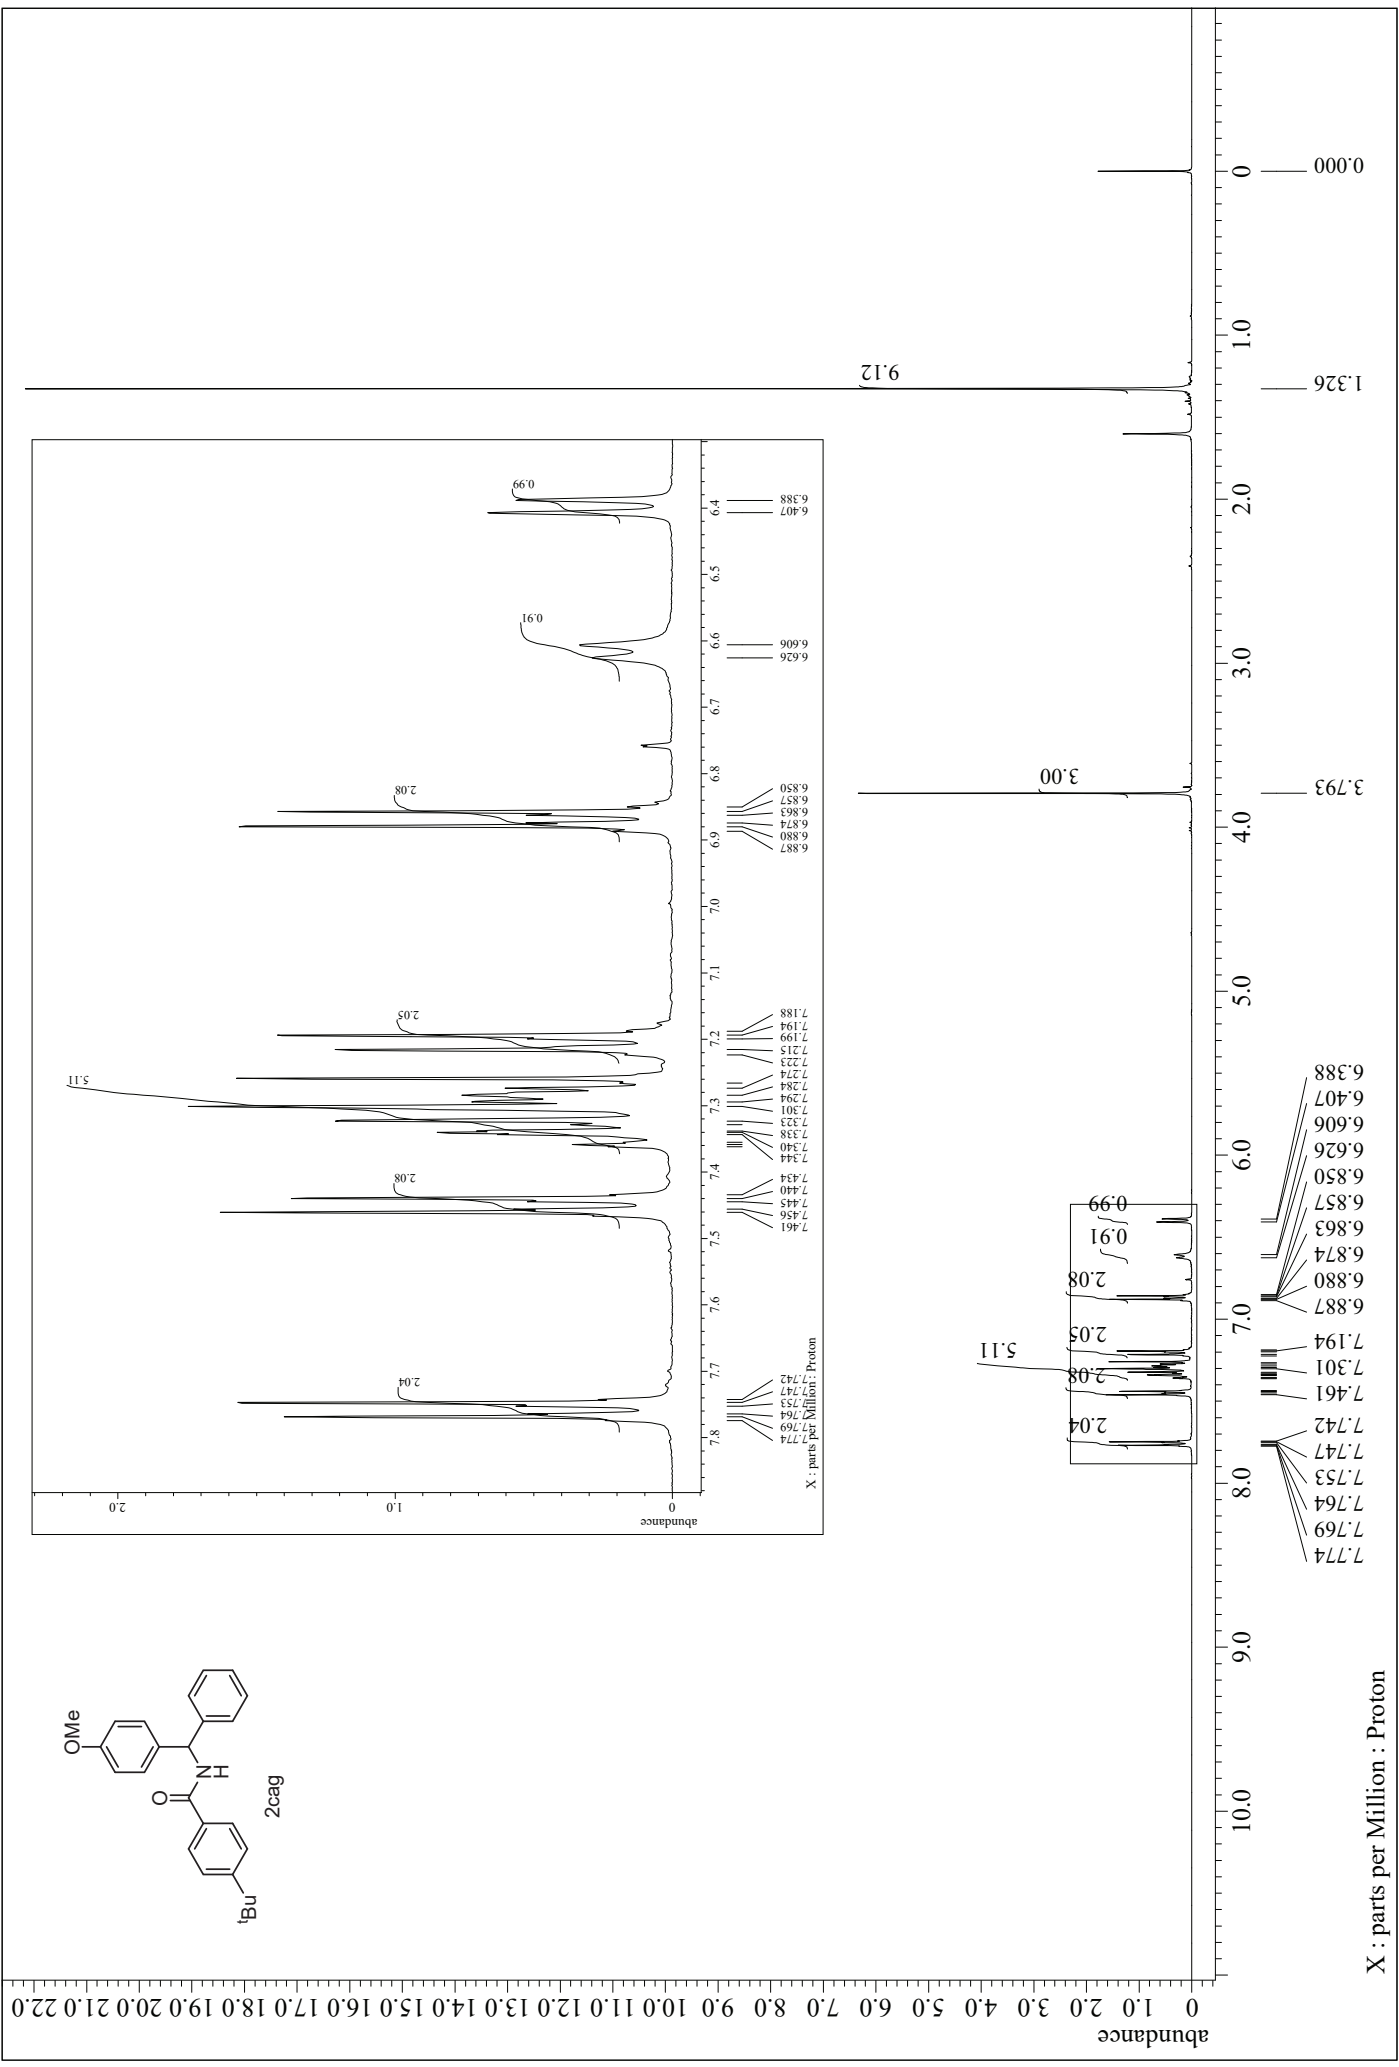

X : parts per Million : Proton

<sup>13</sup>C NMR (101 MHz, CDCl<sub>3</sub>)

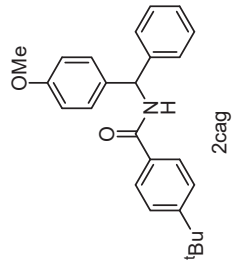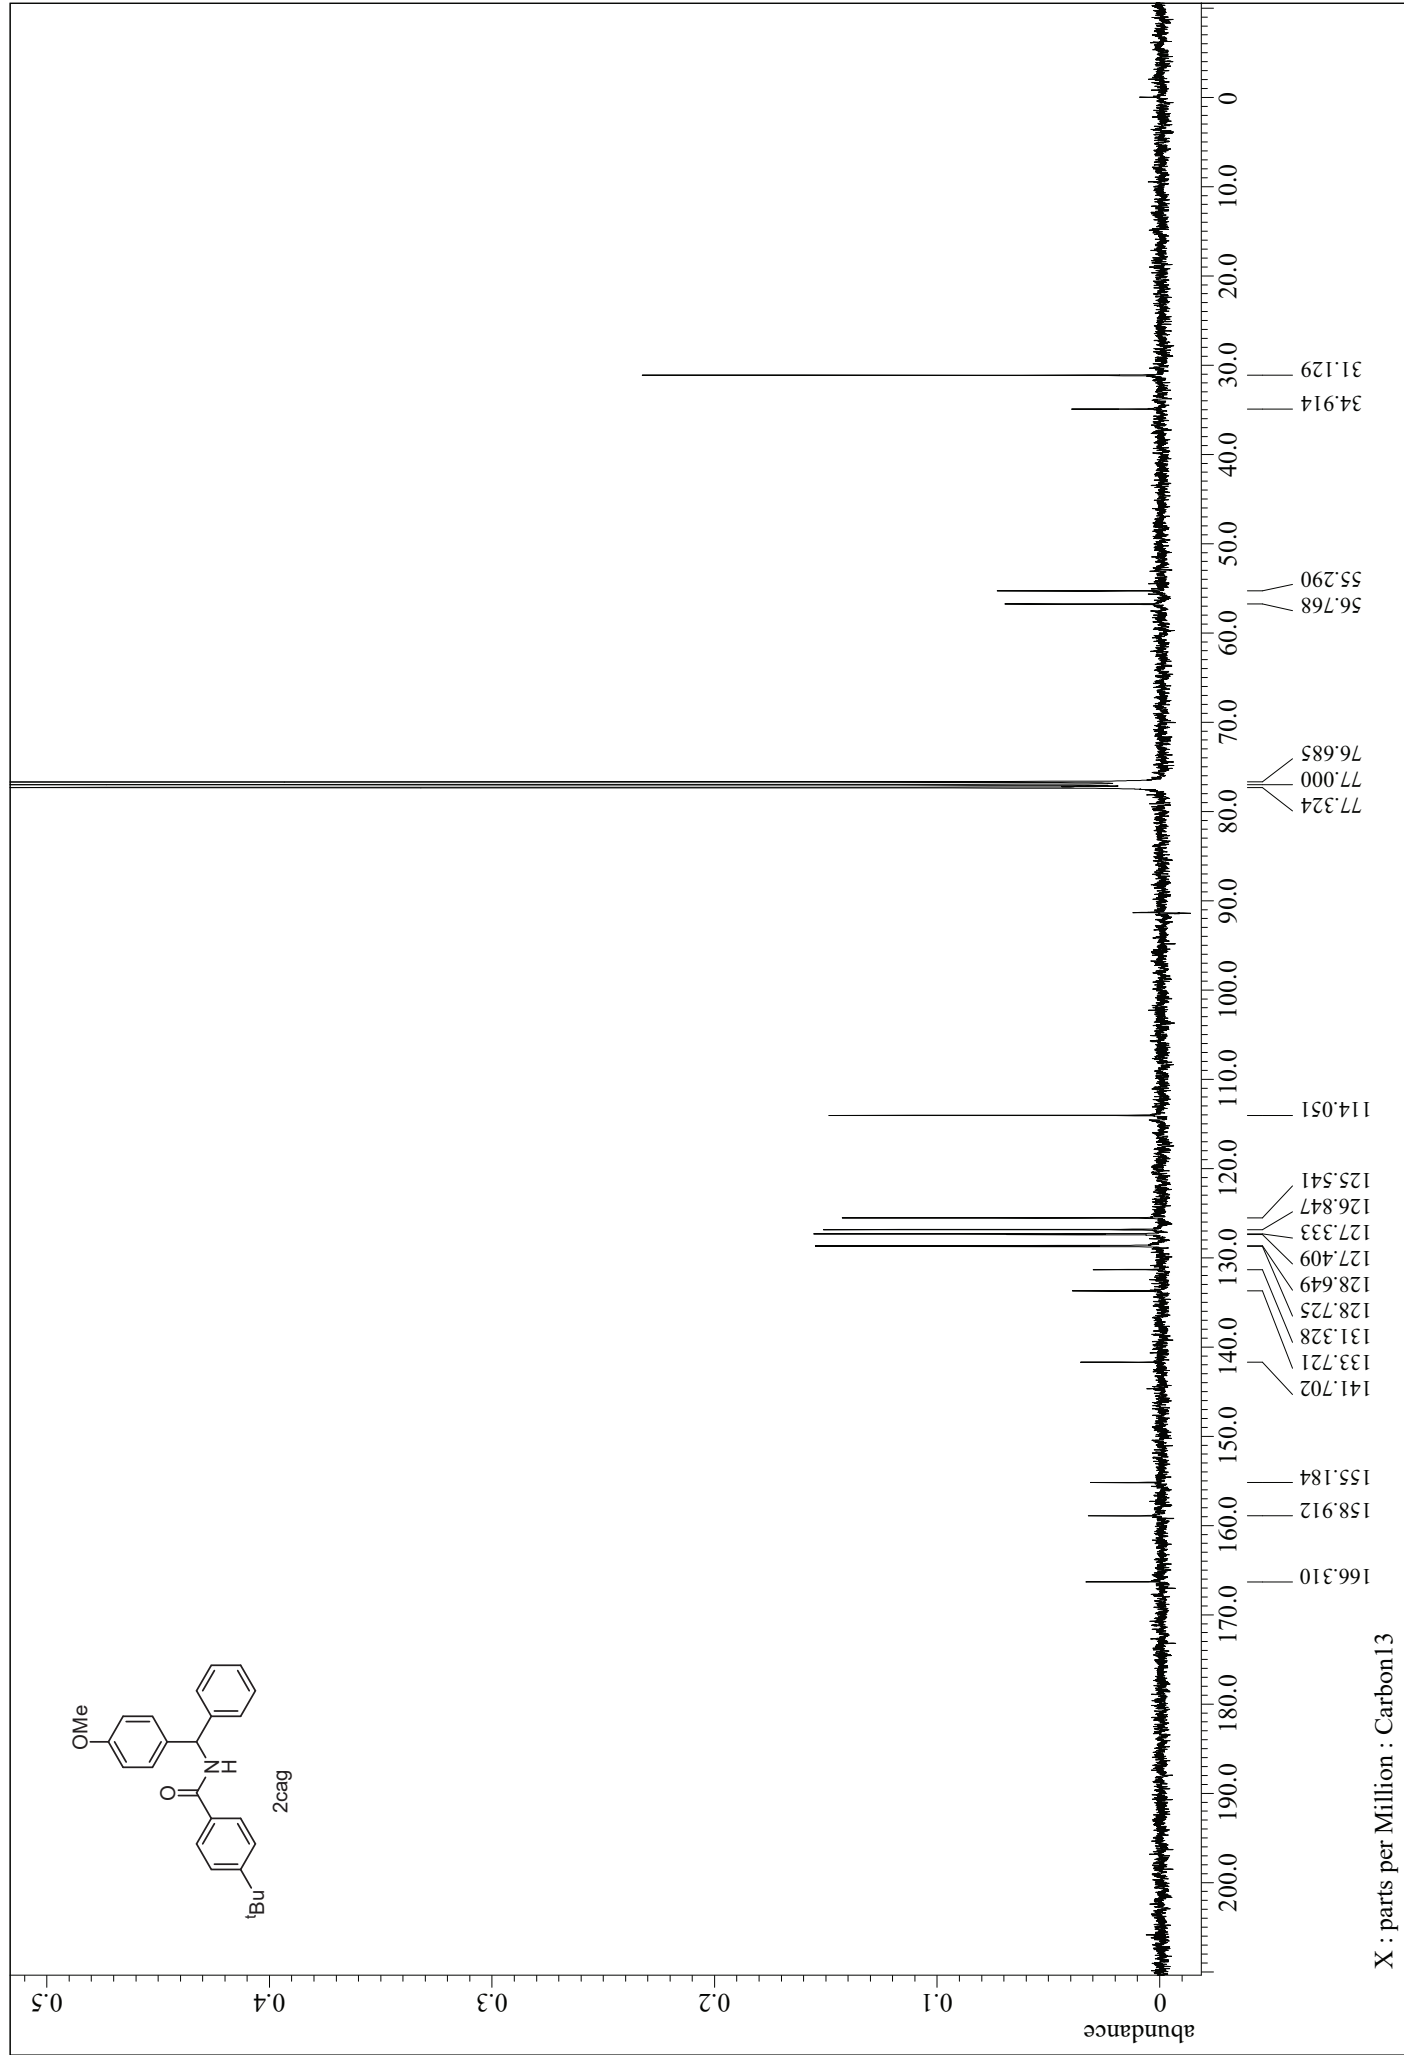

<sup>1</sup>H NMR (400 MHz, CDCl<sub>3</sub>)

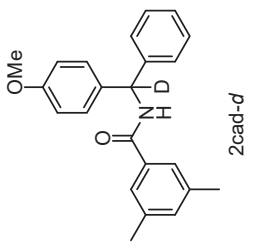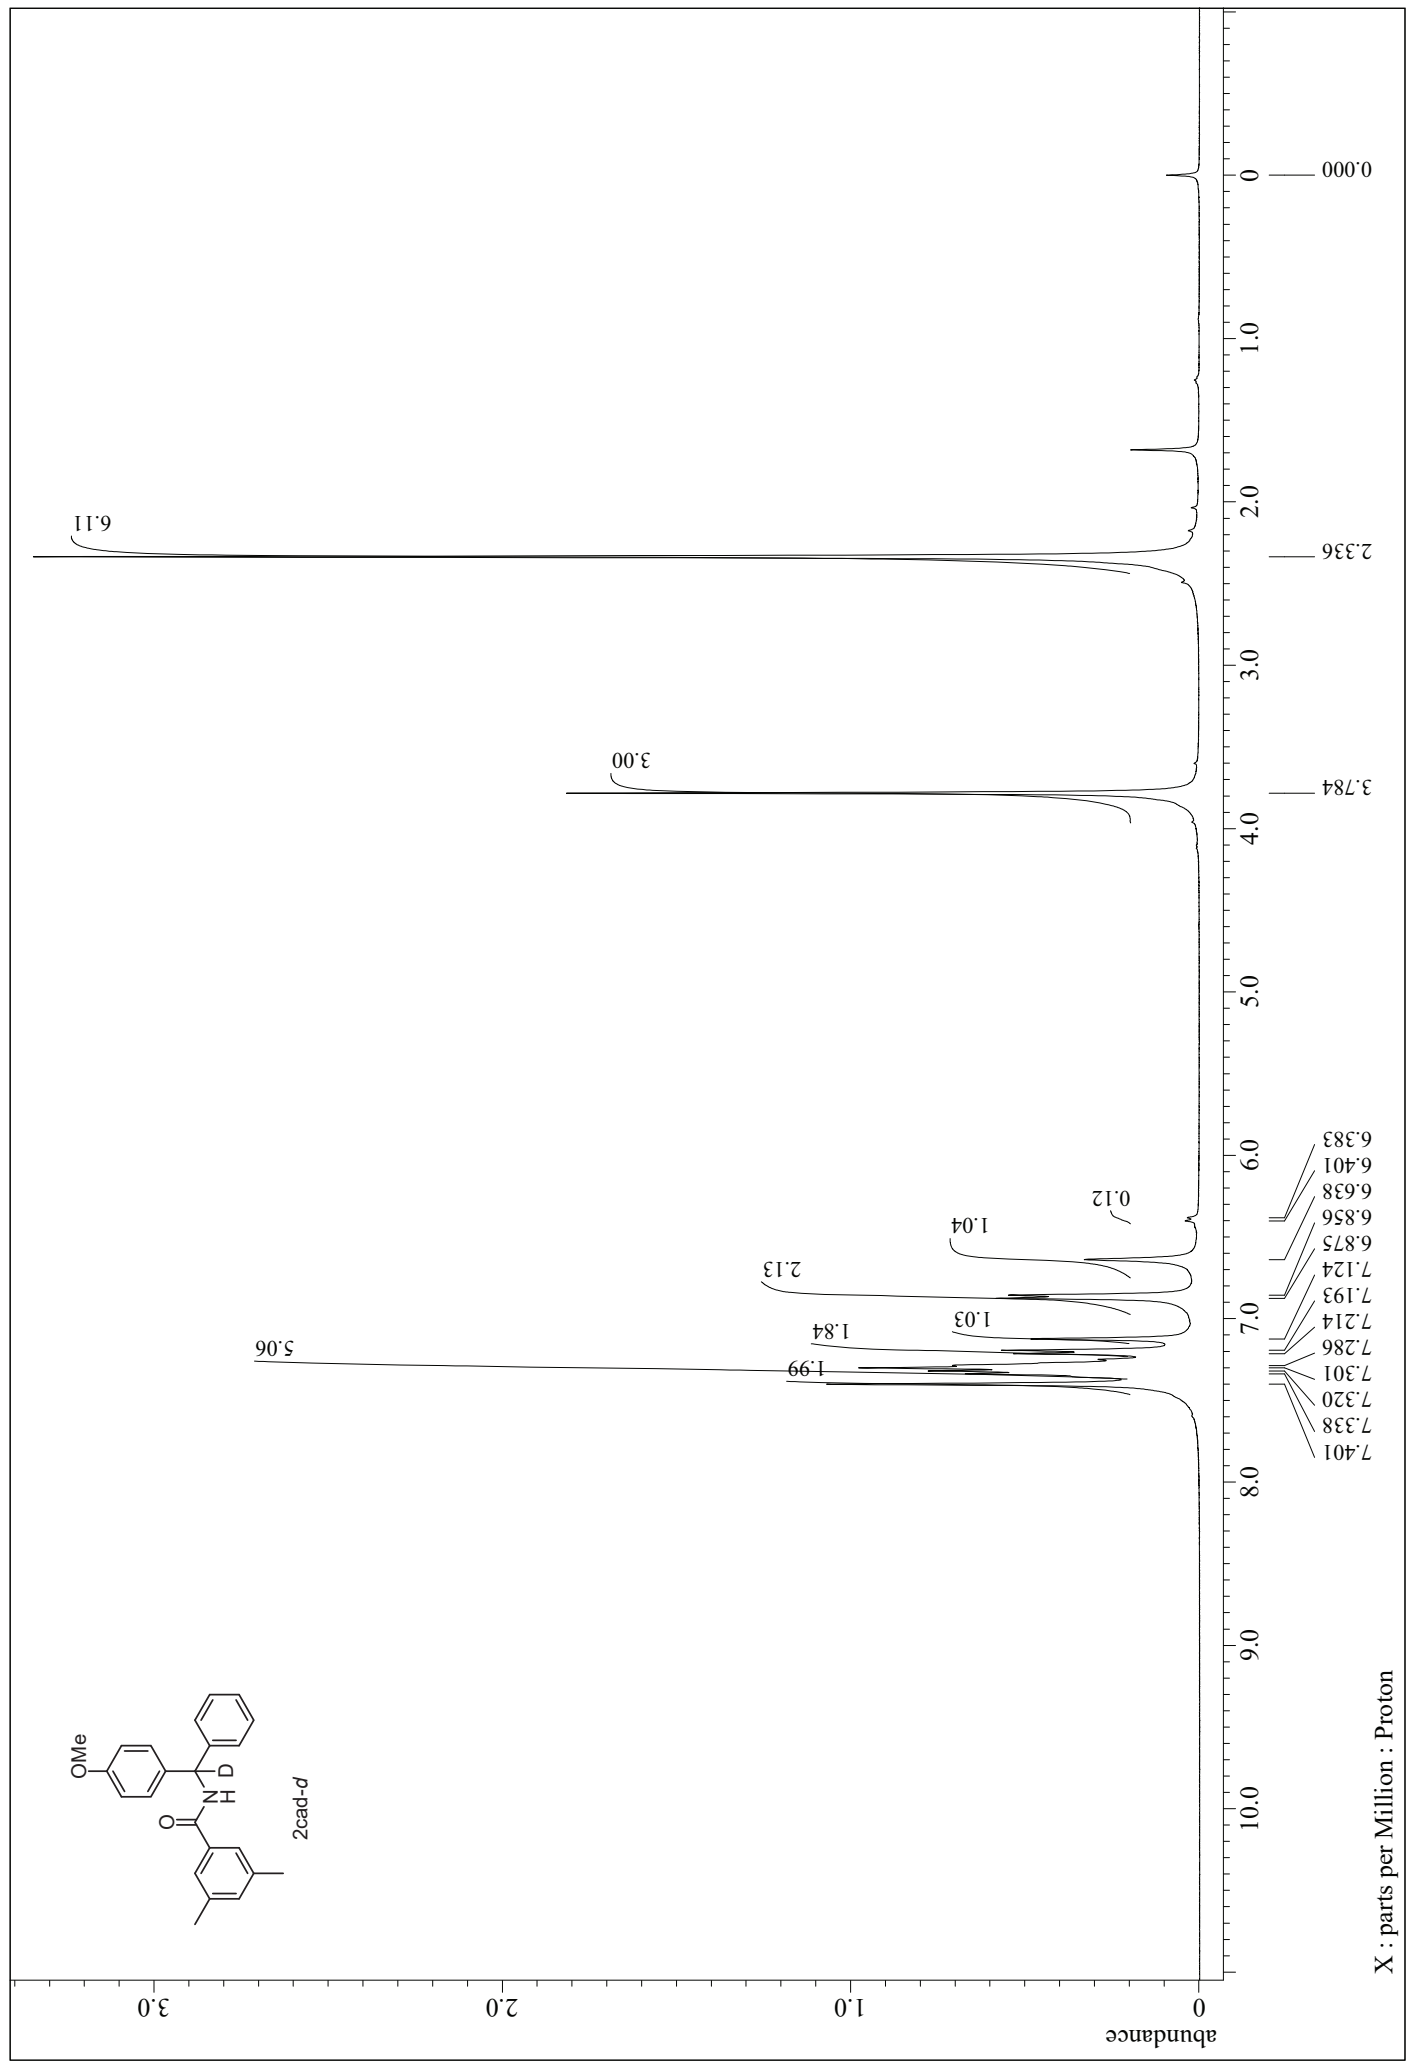

<sup>13</sup>C NMR (101 MHz, CDCl<sub>3</sub>)

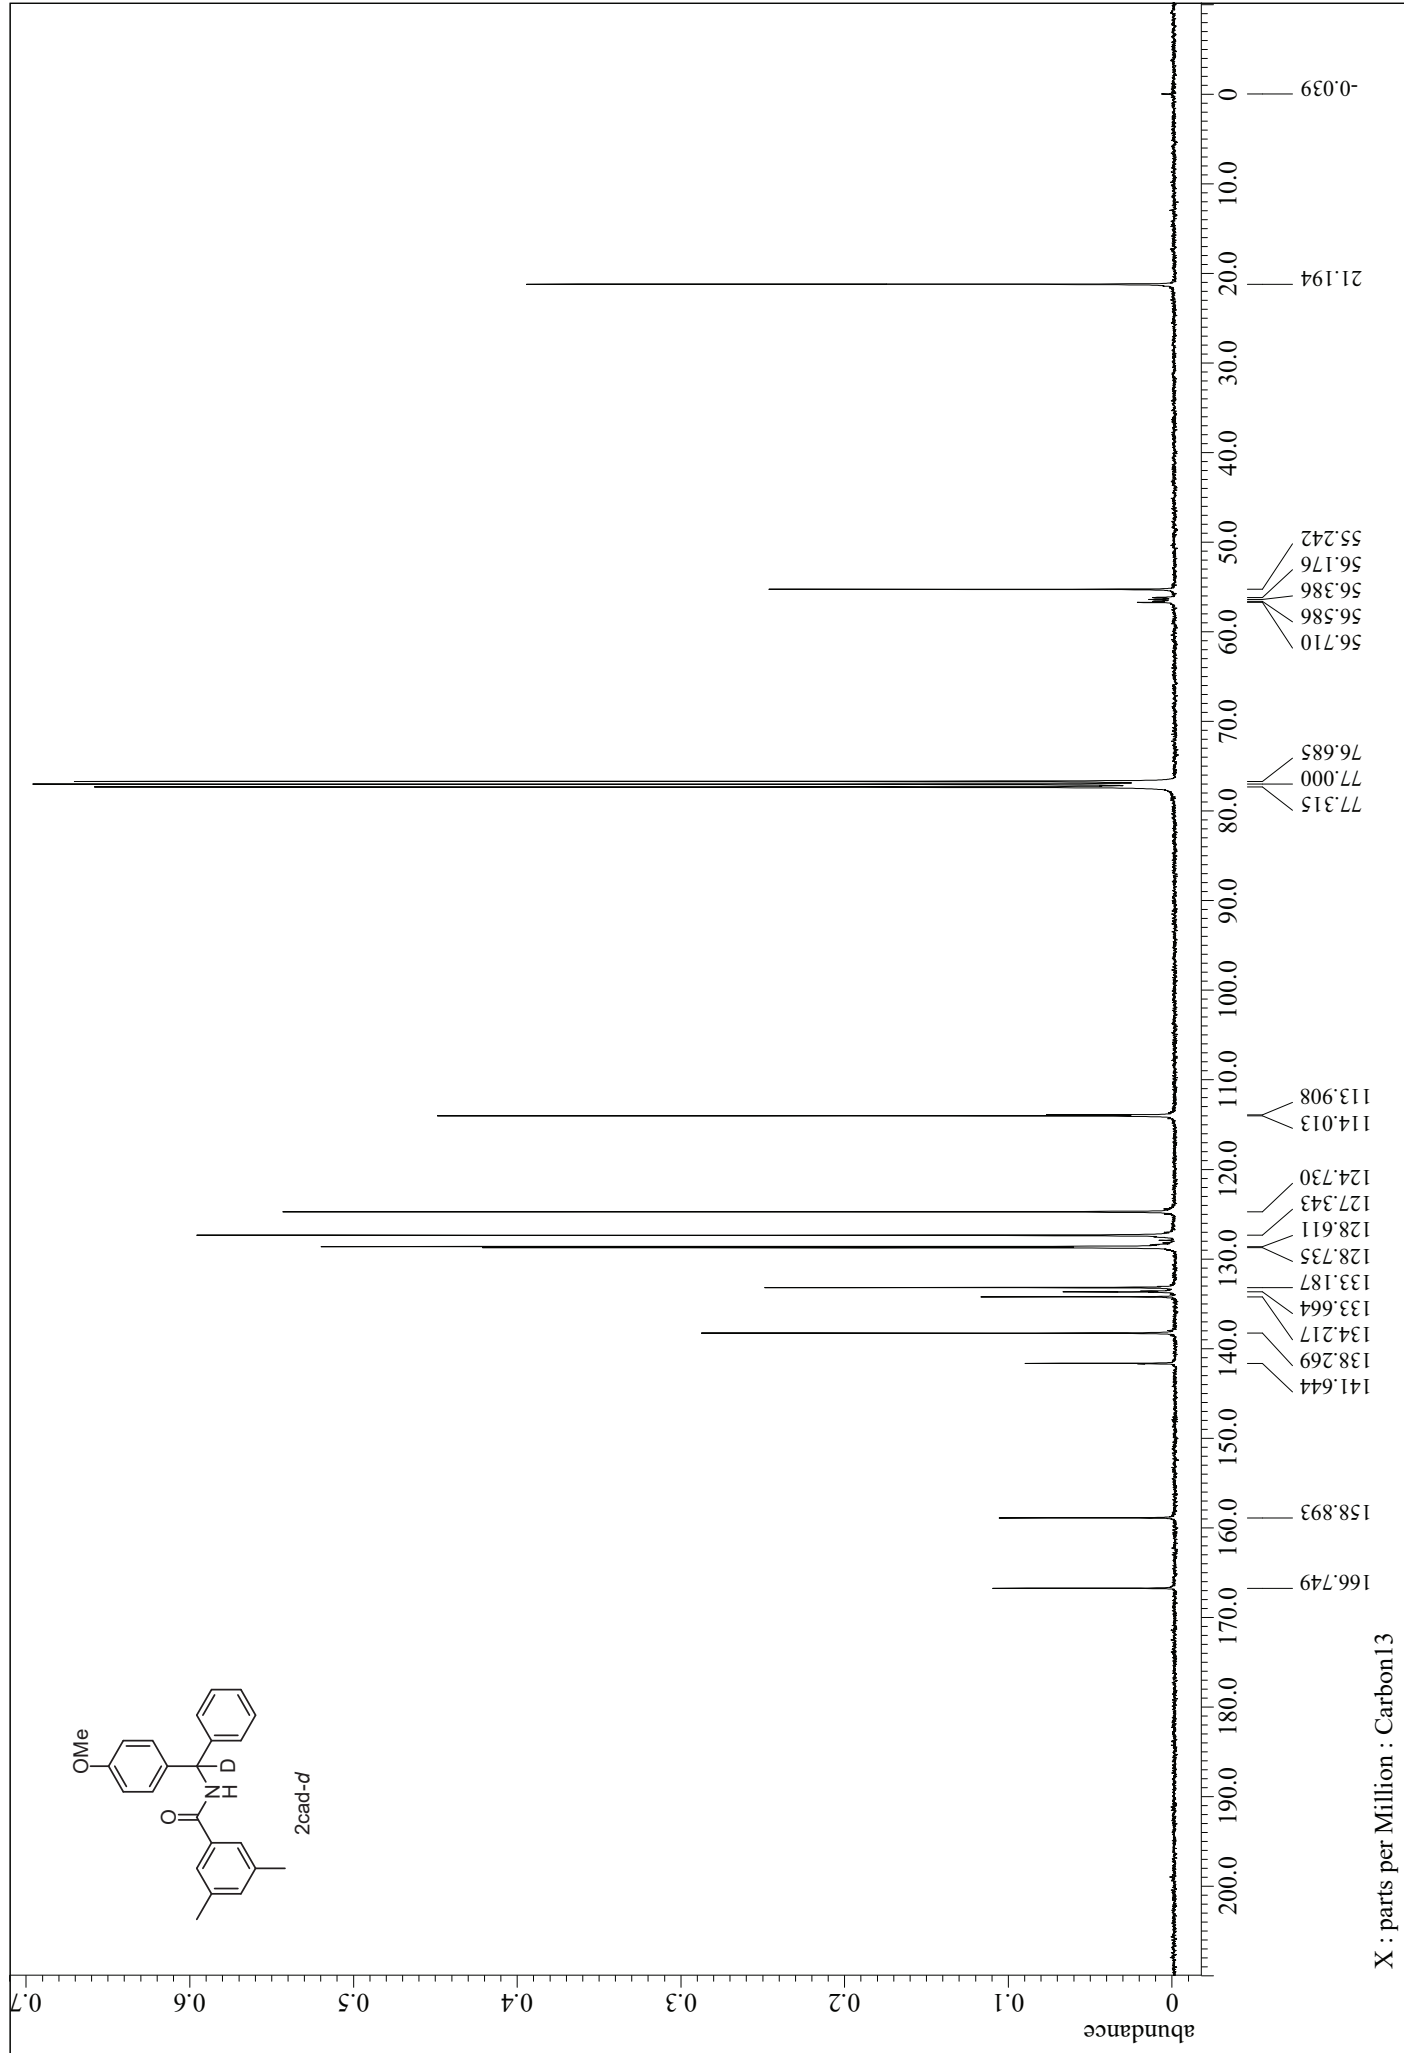

X : parts per Million : Carbon13

$^2\text{H}$  NMR (61.37 MHz,  $\text{CHCl}_3$ )

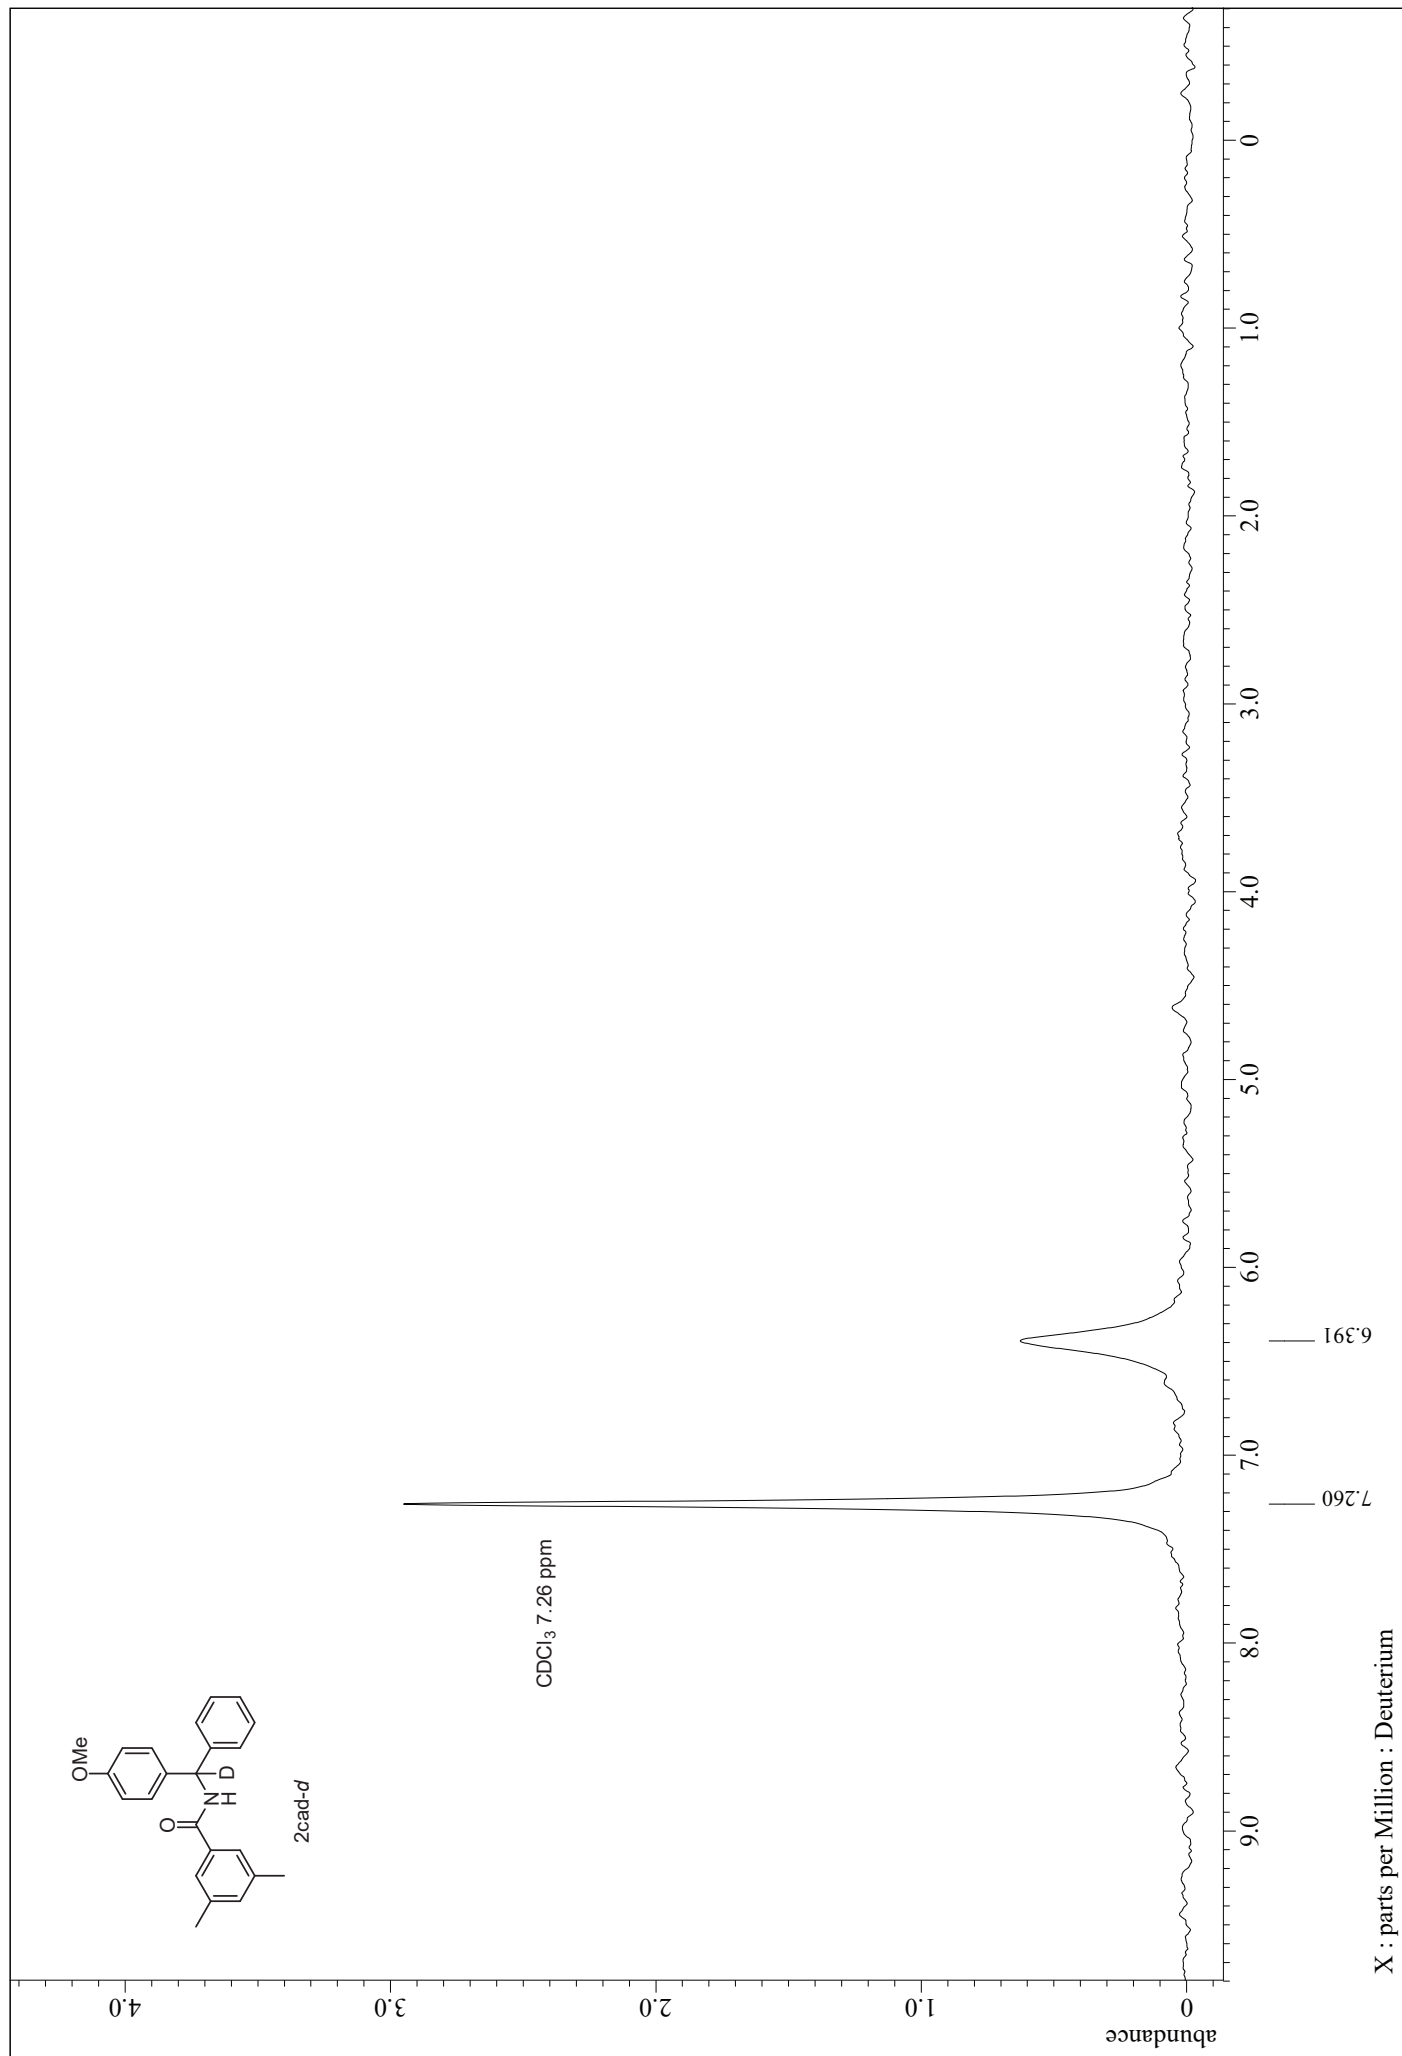



<sup>1</sup>H NMR (400 MHz, CDCl<sub>3</sub>)

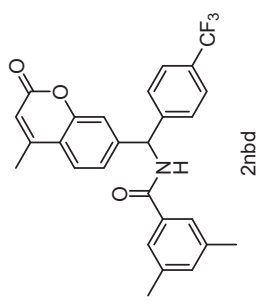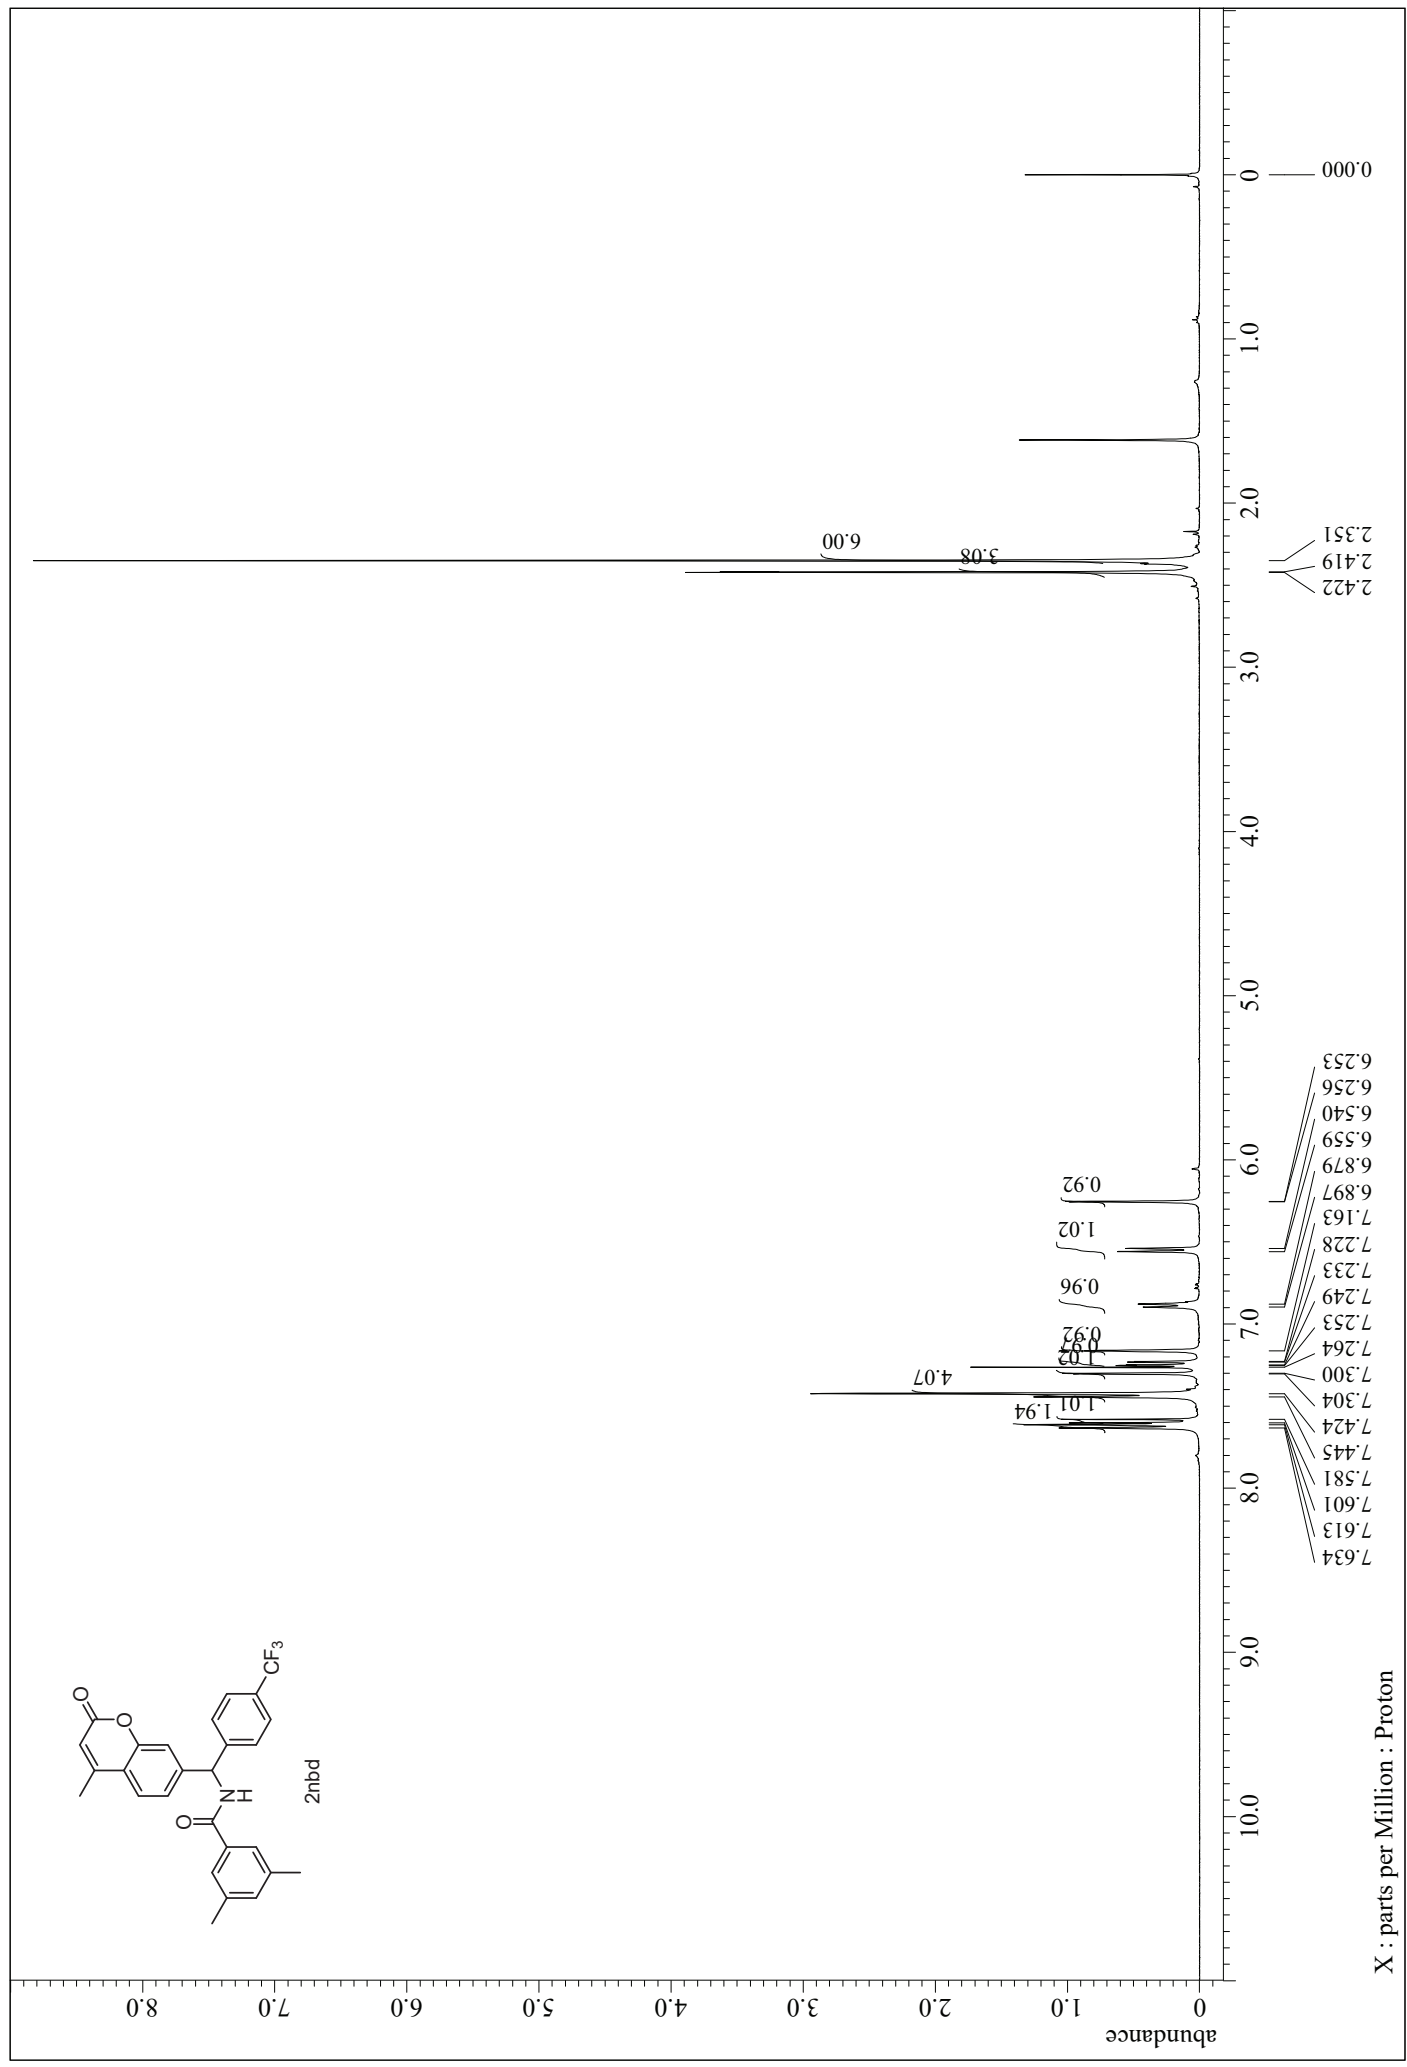

<sup>13</sup>C NMR (101 MHz, CDCl<sub>3</sub>)

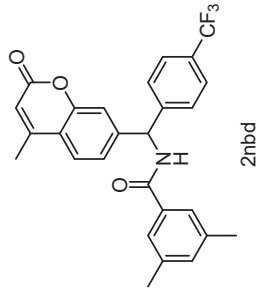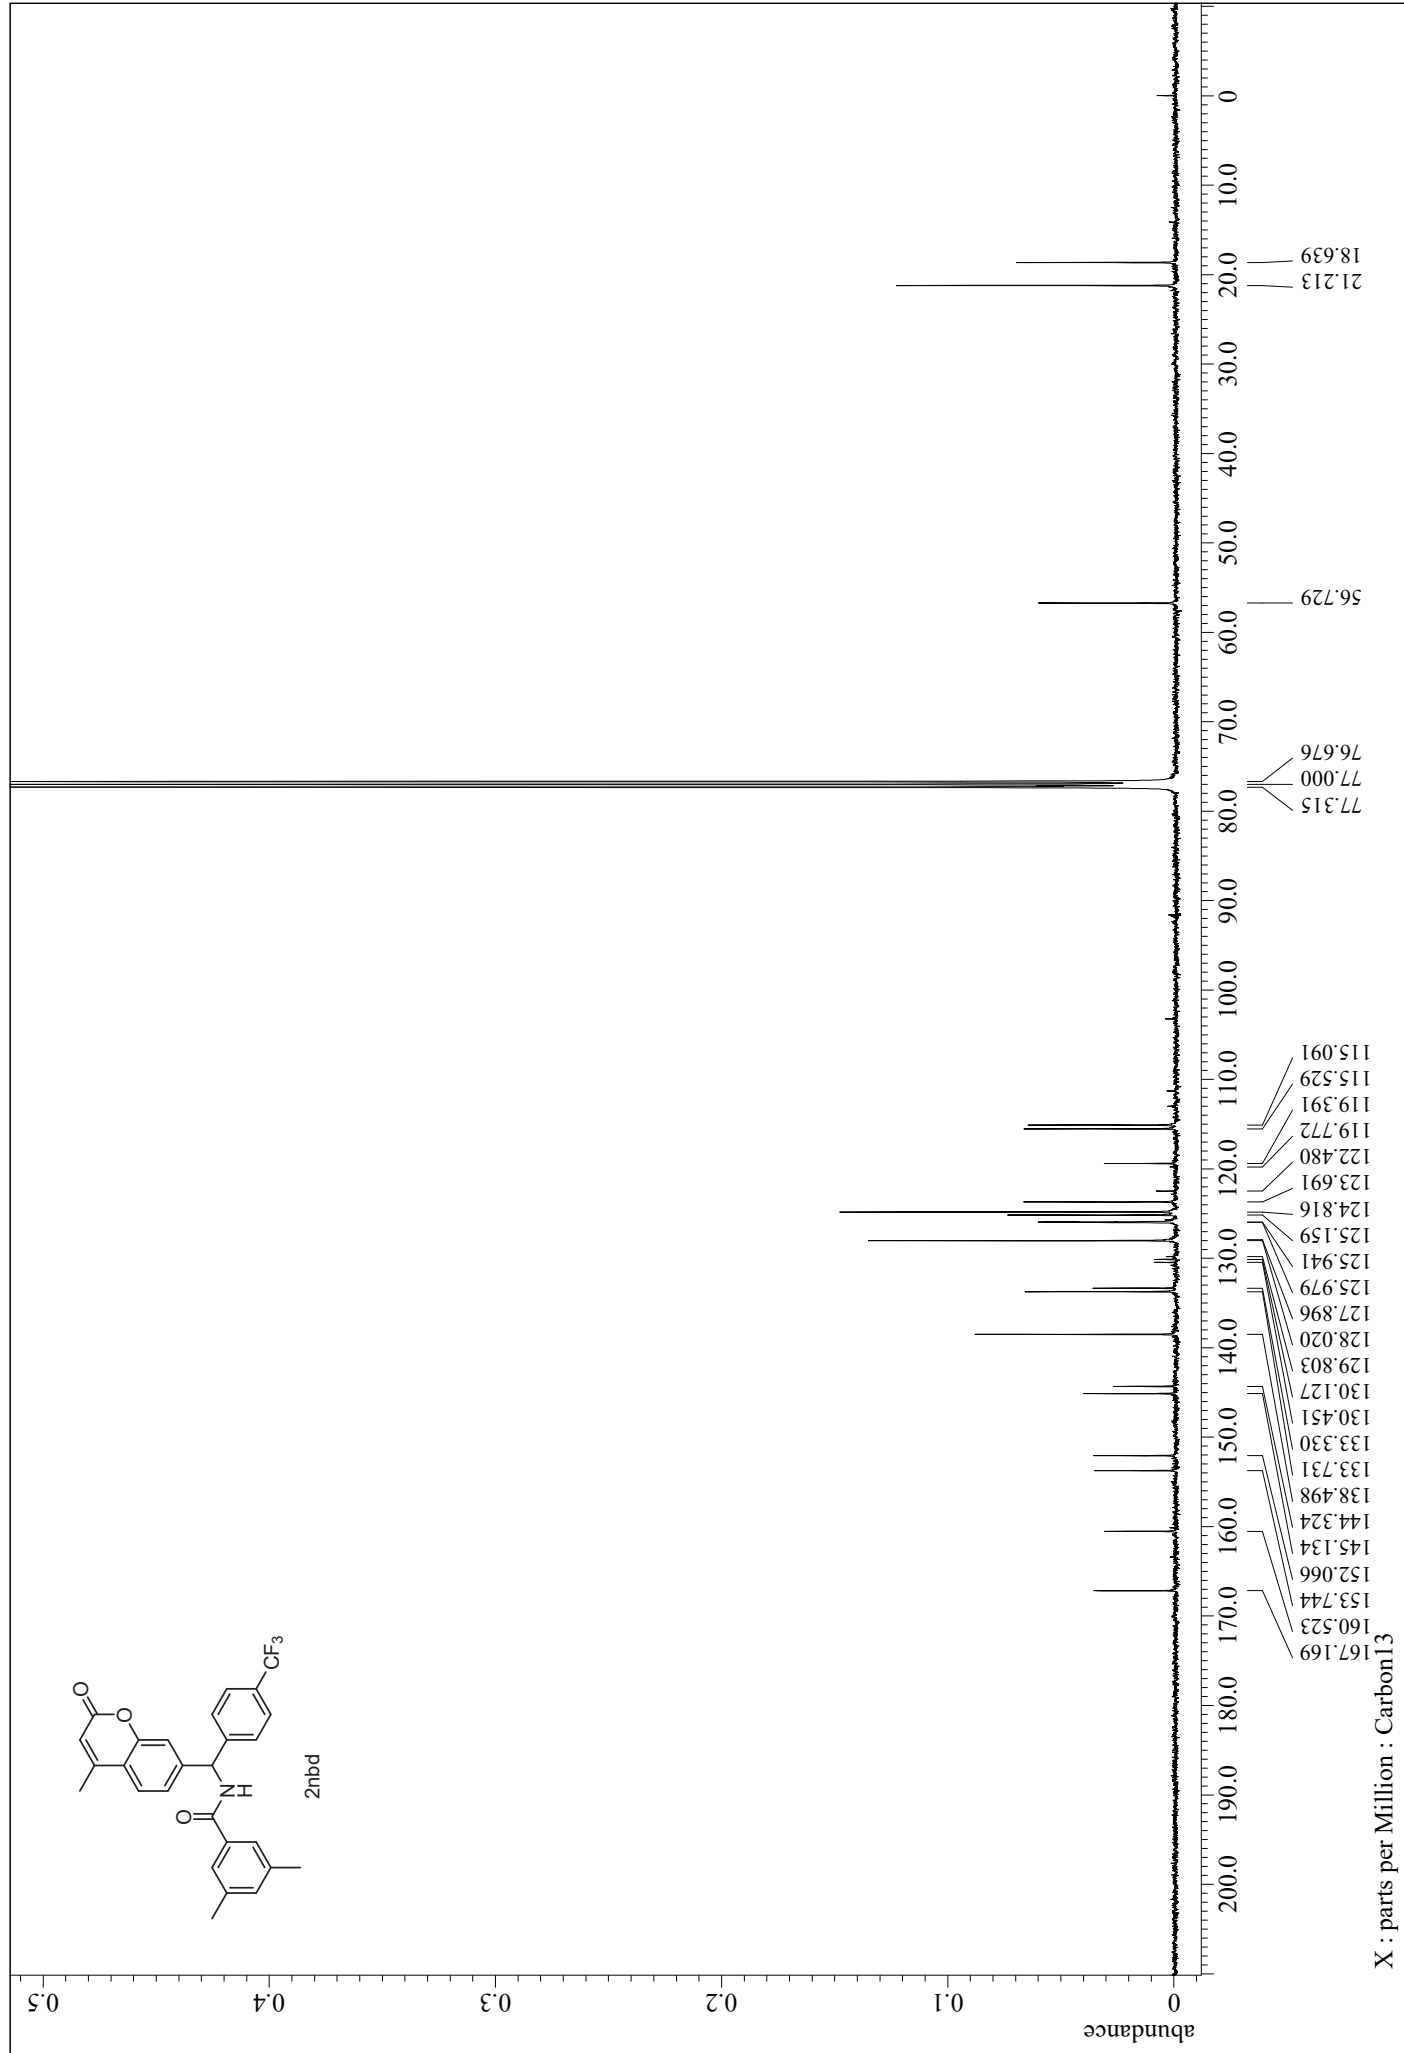

$^{19}\text{F}$  NMR (376 MHz,  $\text{CDCl}_3$ )

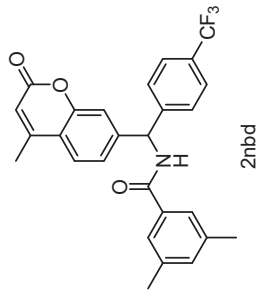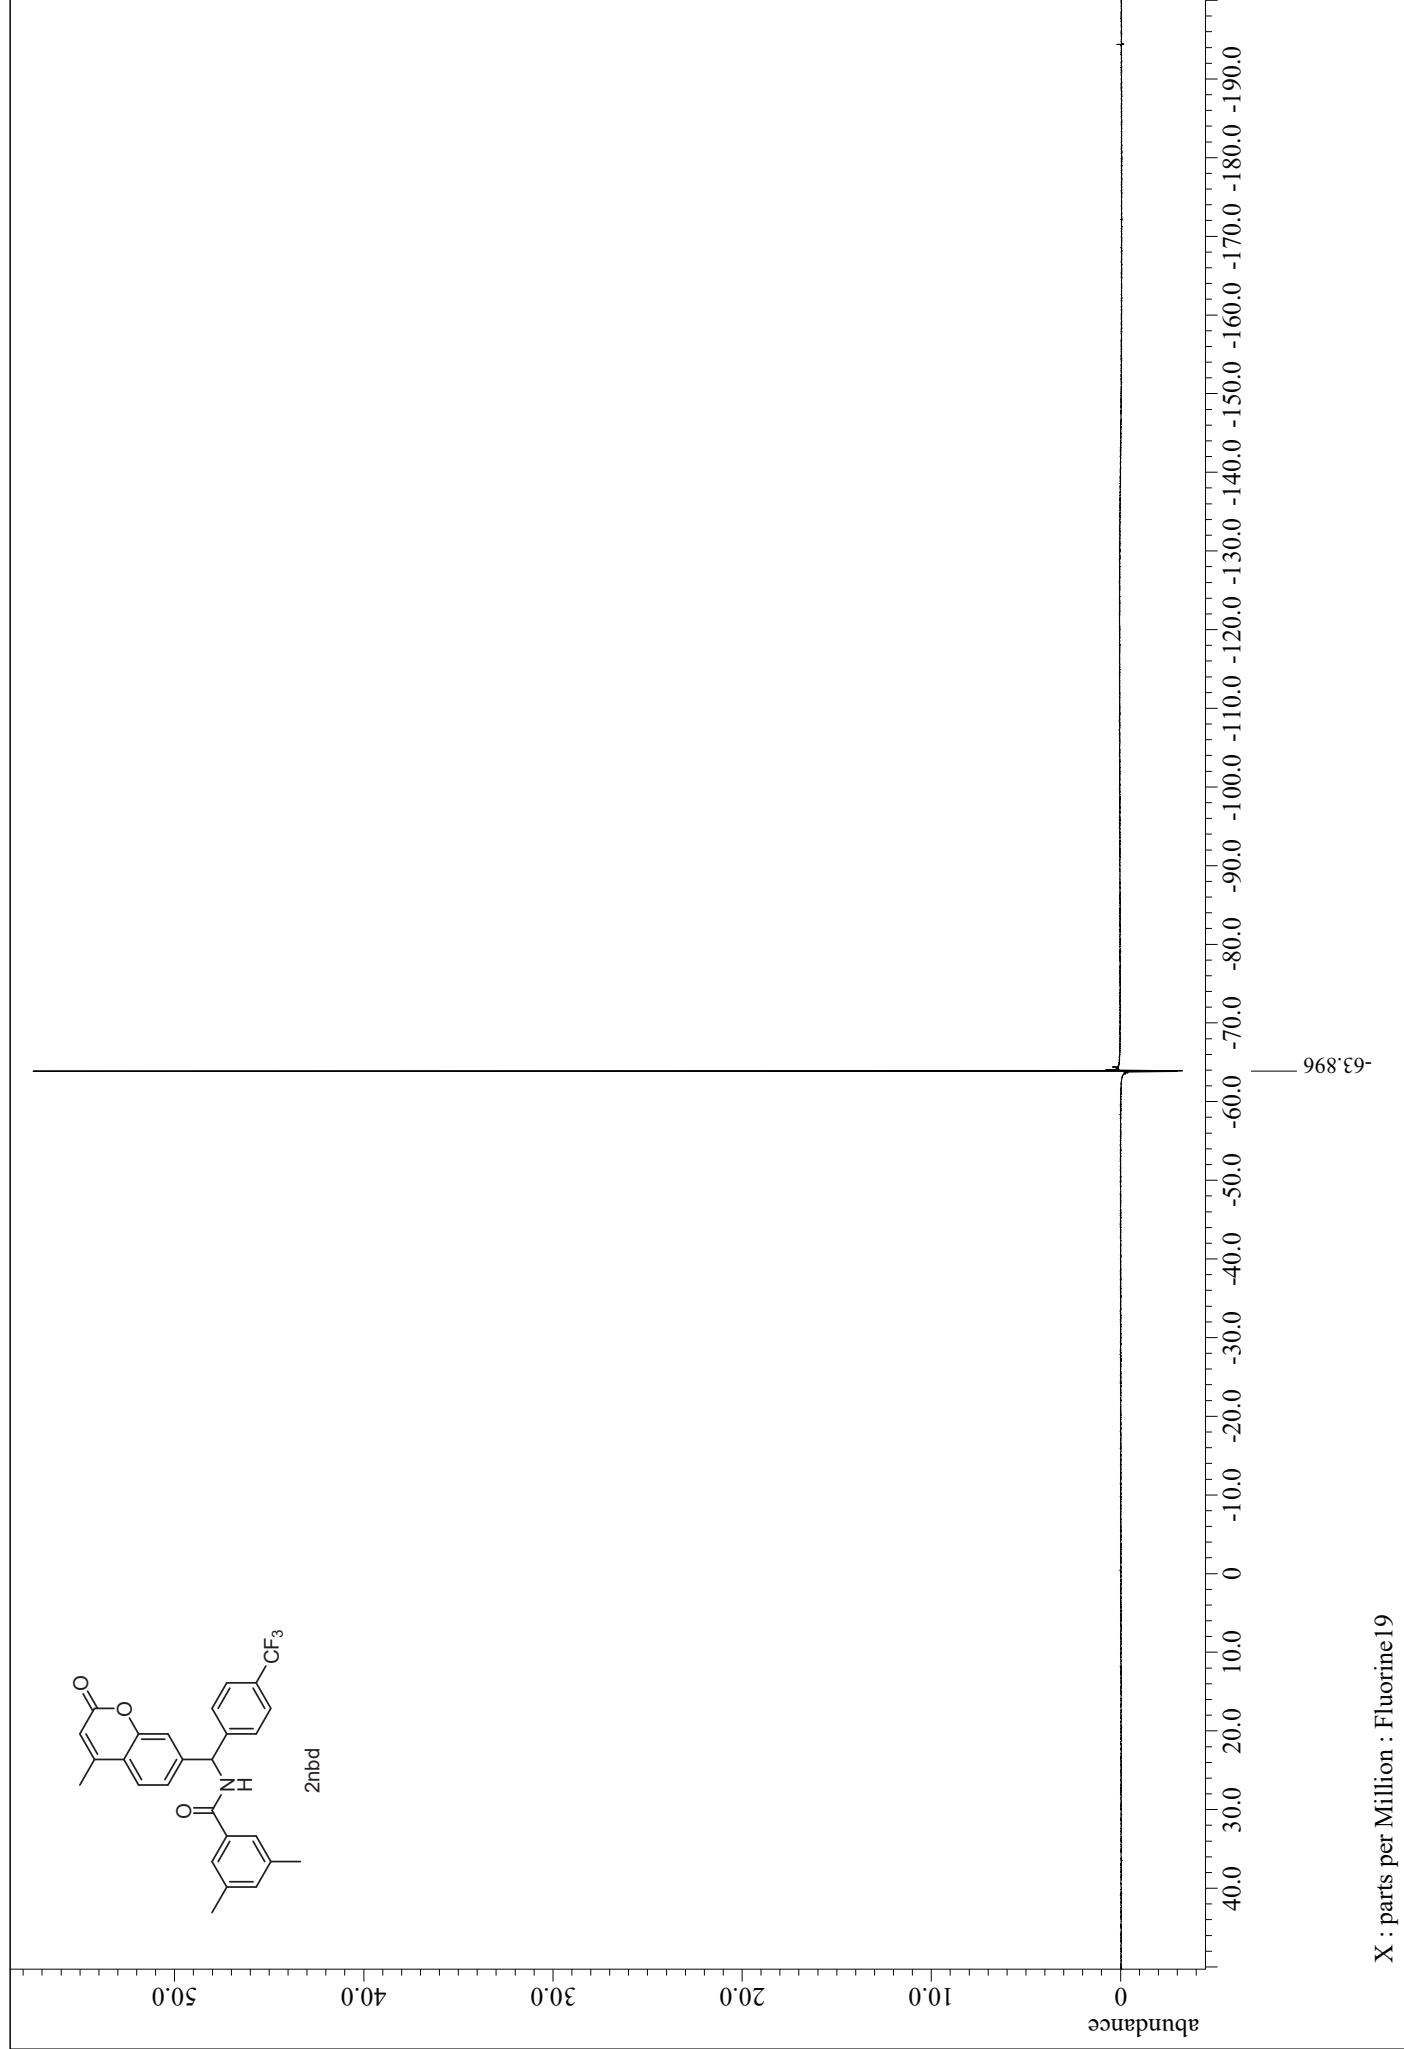

X : parts per Million : Fluorine 19

<sup>1</sup>H NMR (400 MHz, CDCl<sub>3</sub>)

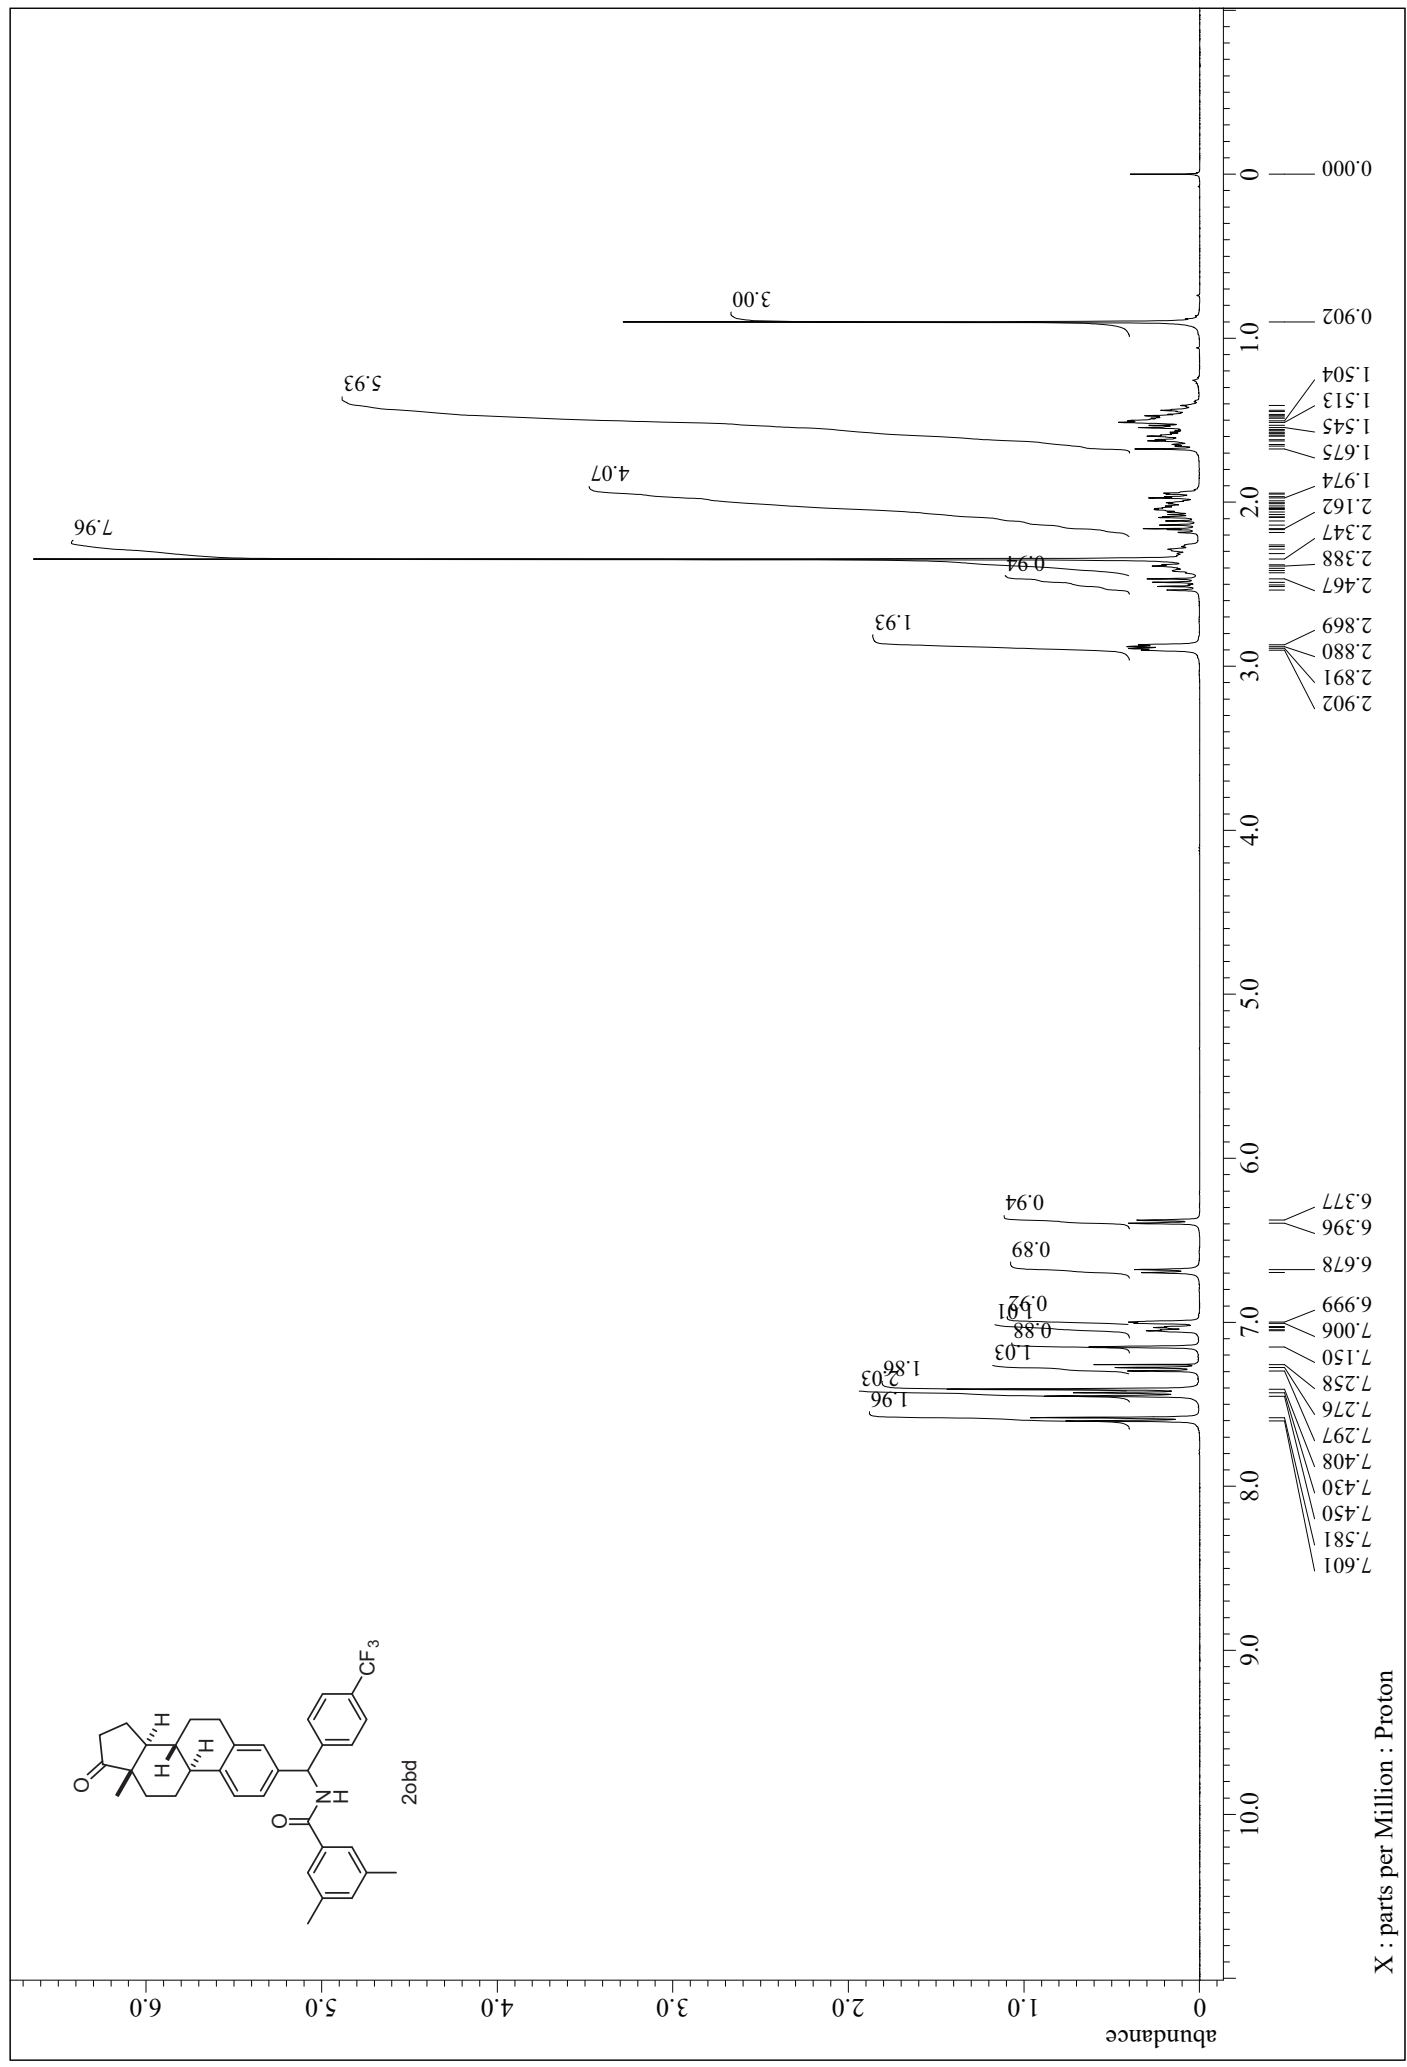

X : parts per Million : Proton

<sup>13</sup>C NMR (101 MHz, CDCl<sub>3</sub>)

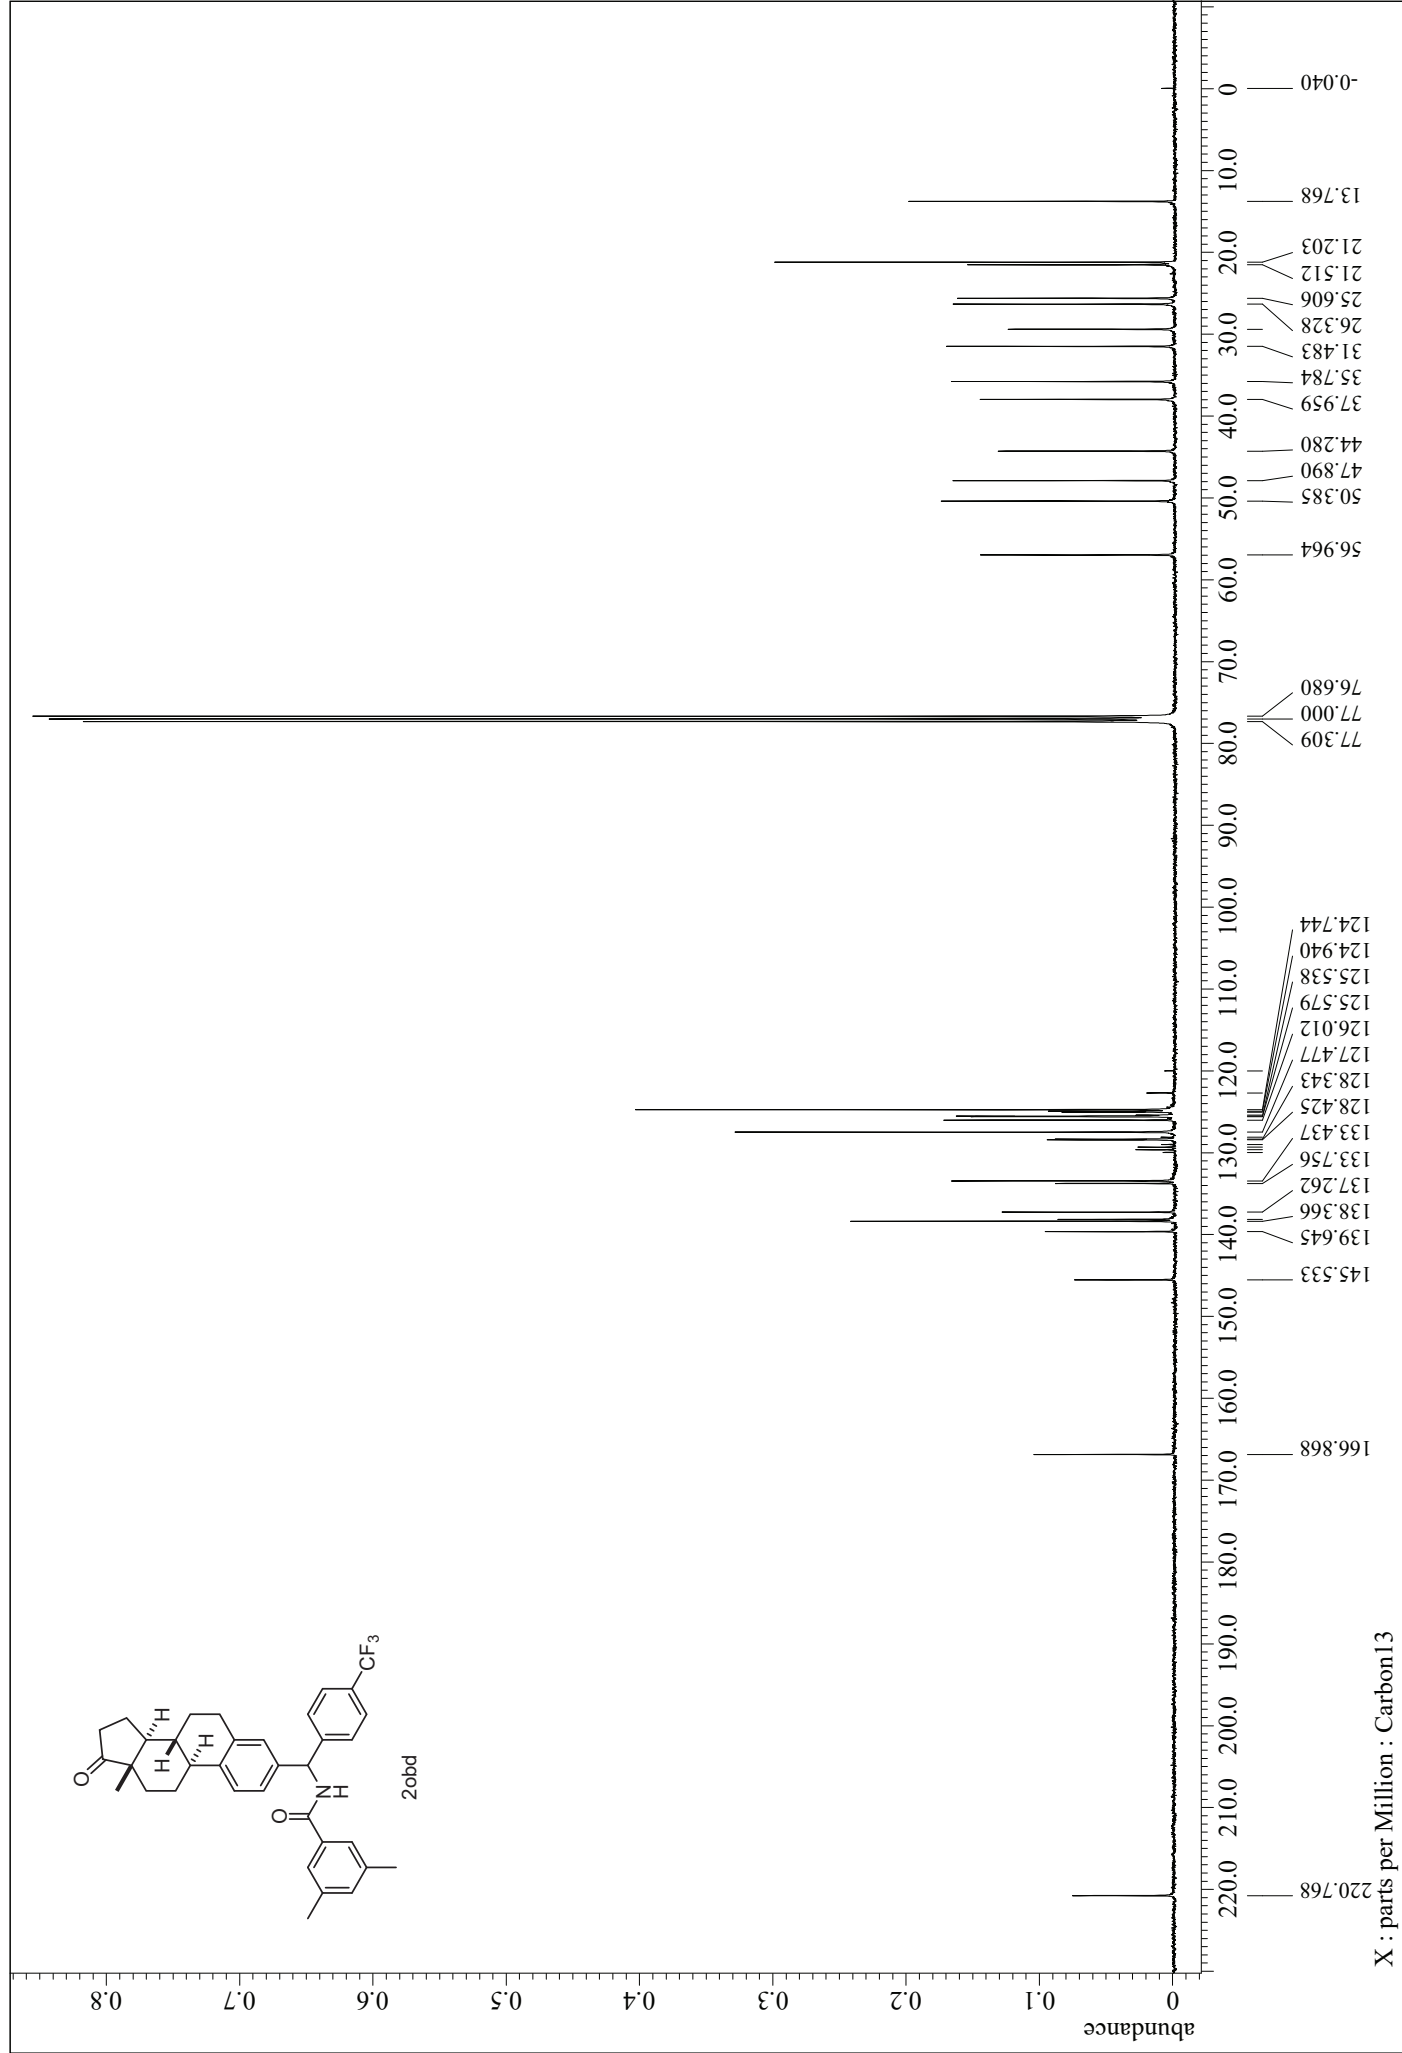

<sup>19</sup>F NMR (376 MHz, CDCl<sub>3</sub>)

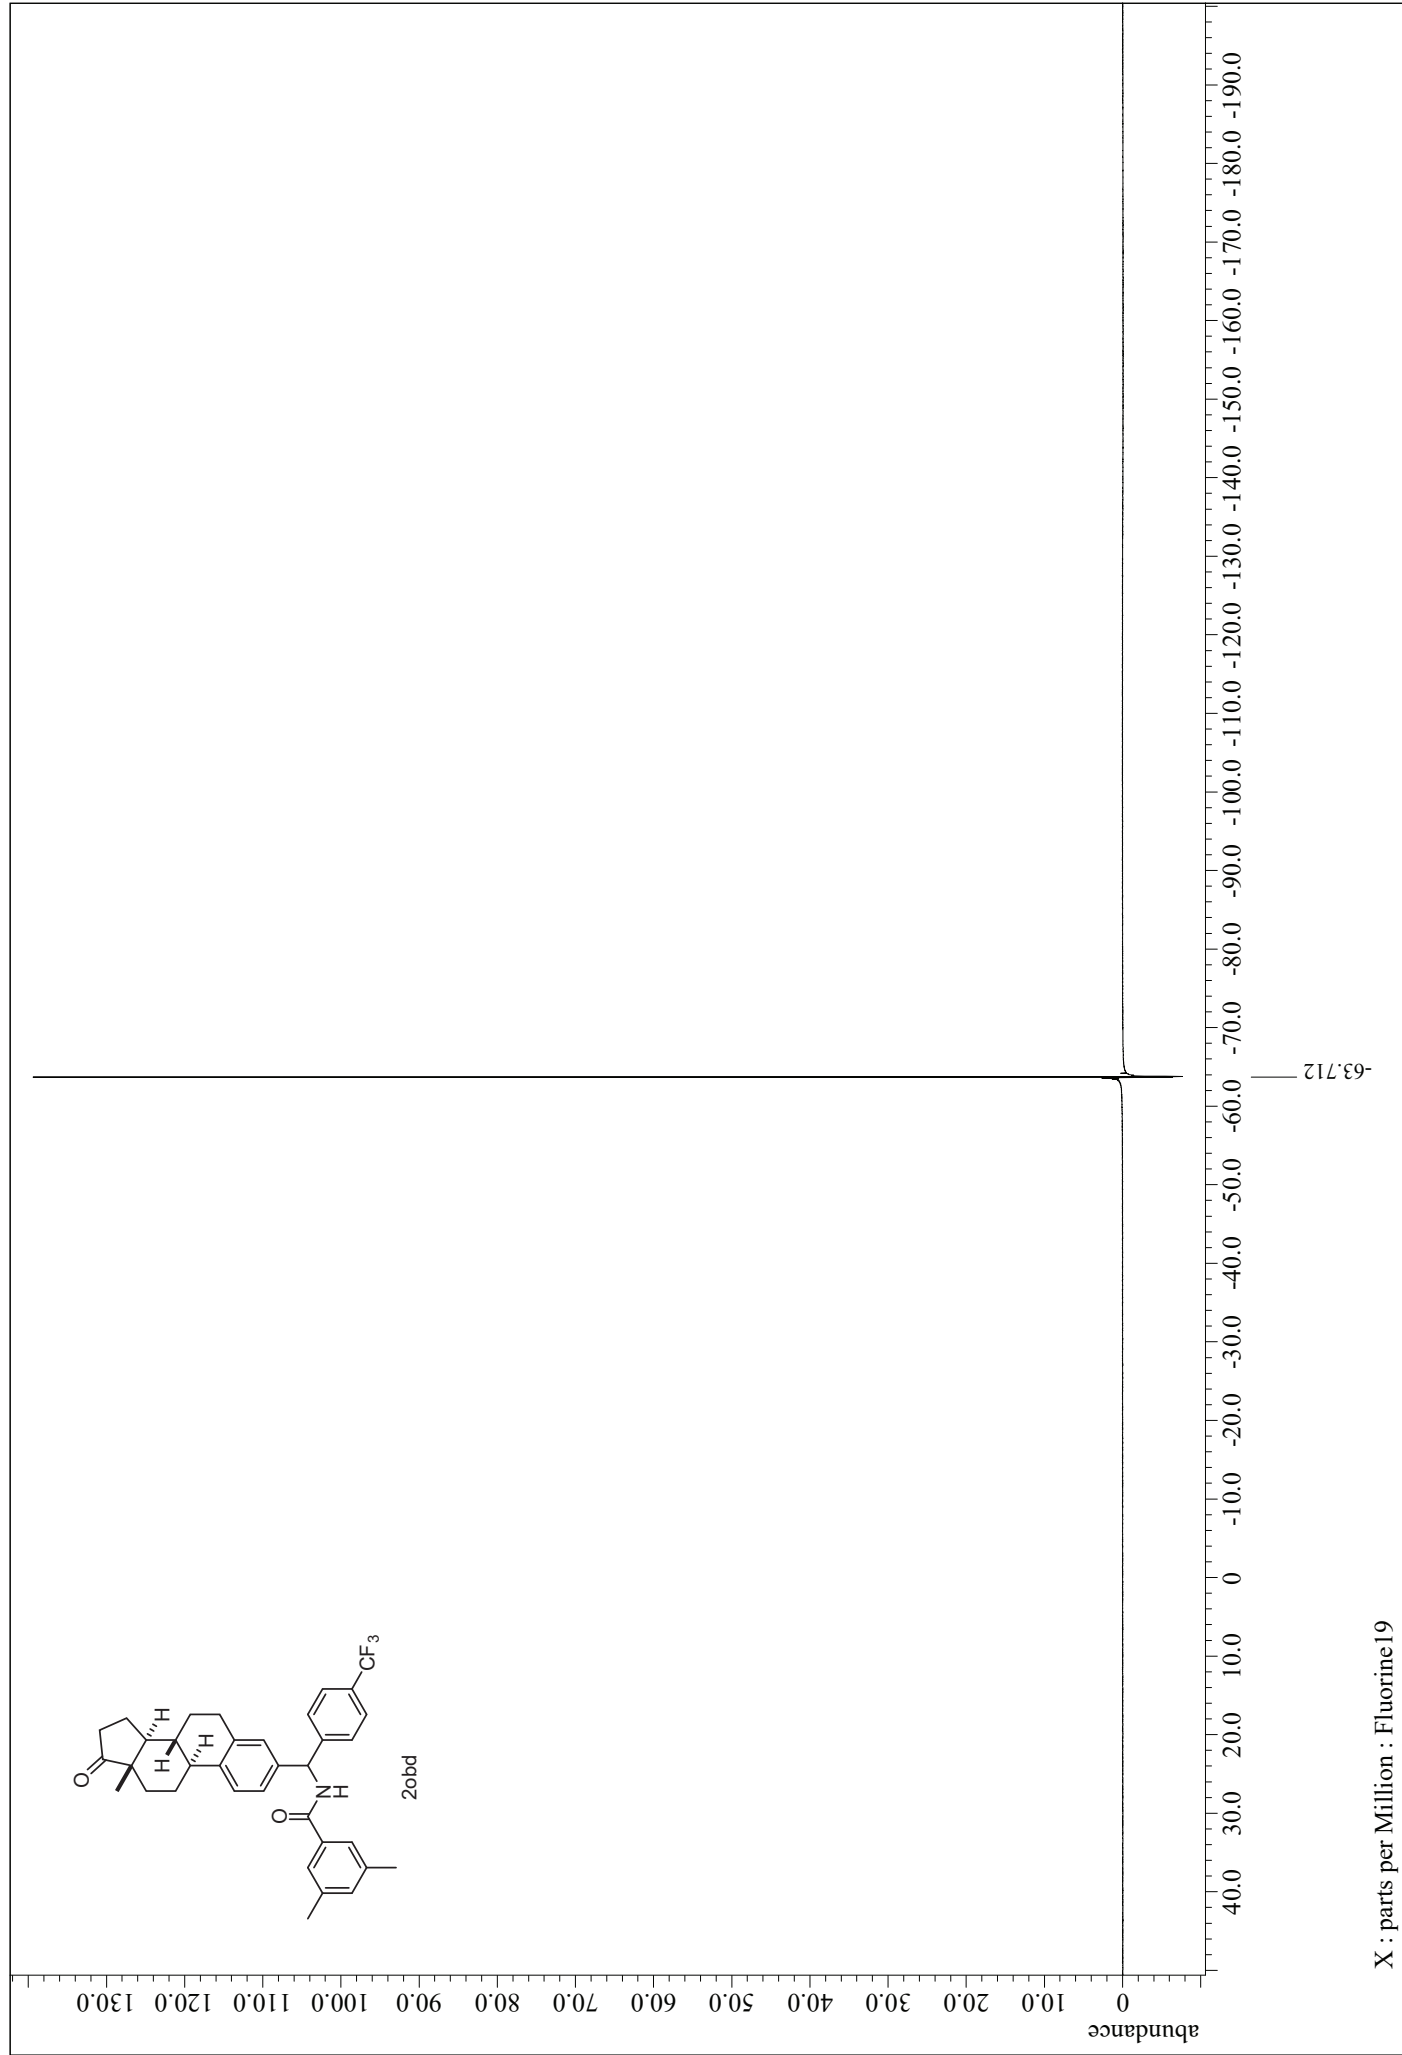

X : parts per Million : Fluorine 19

<sup>1</sup>H NMR (400 MHz, CDCl<sub>3</sub>)

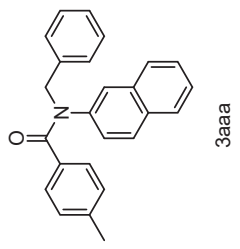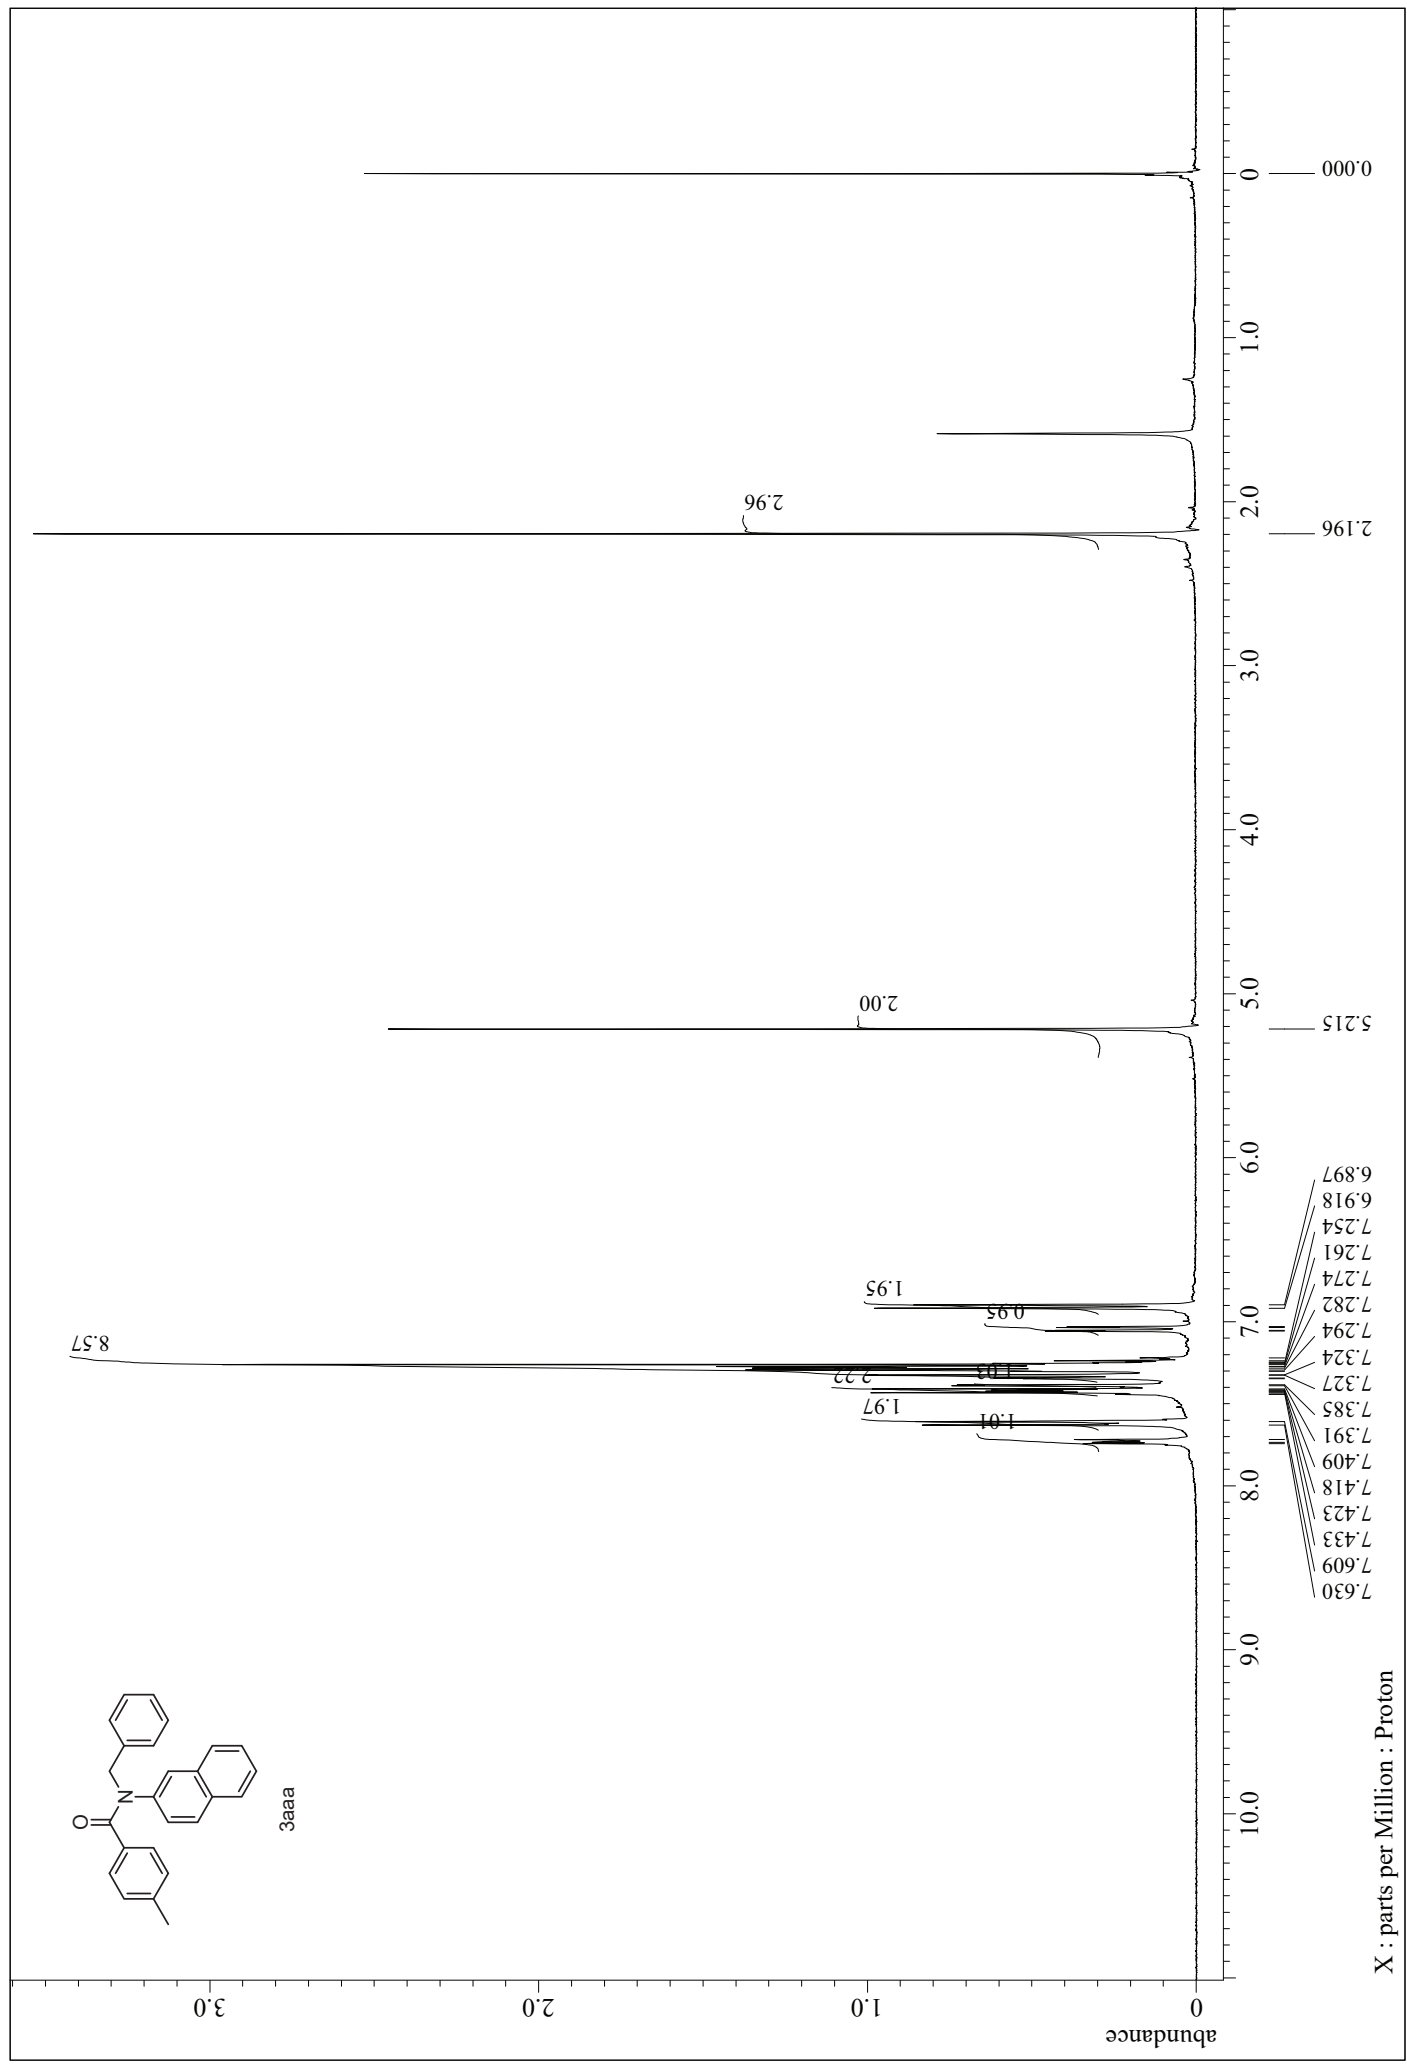

<sup>13</sup>C NMR (101 MHz, CDCl<sub>3</sub>)

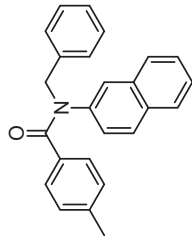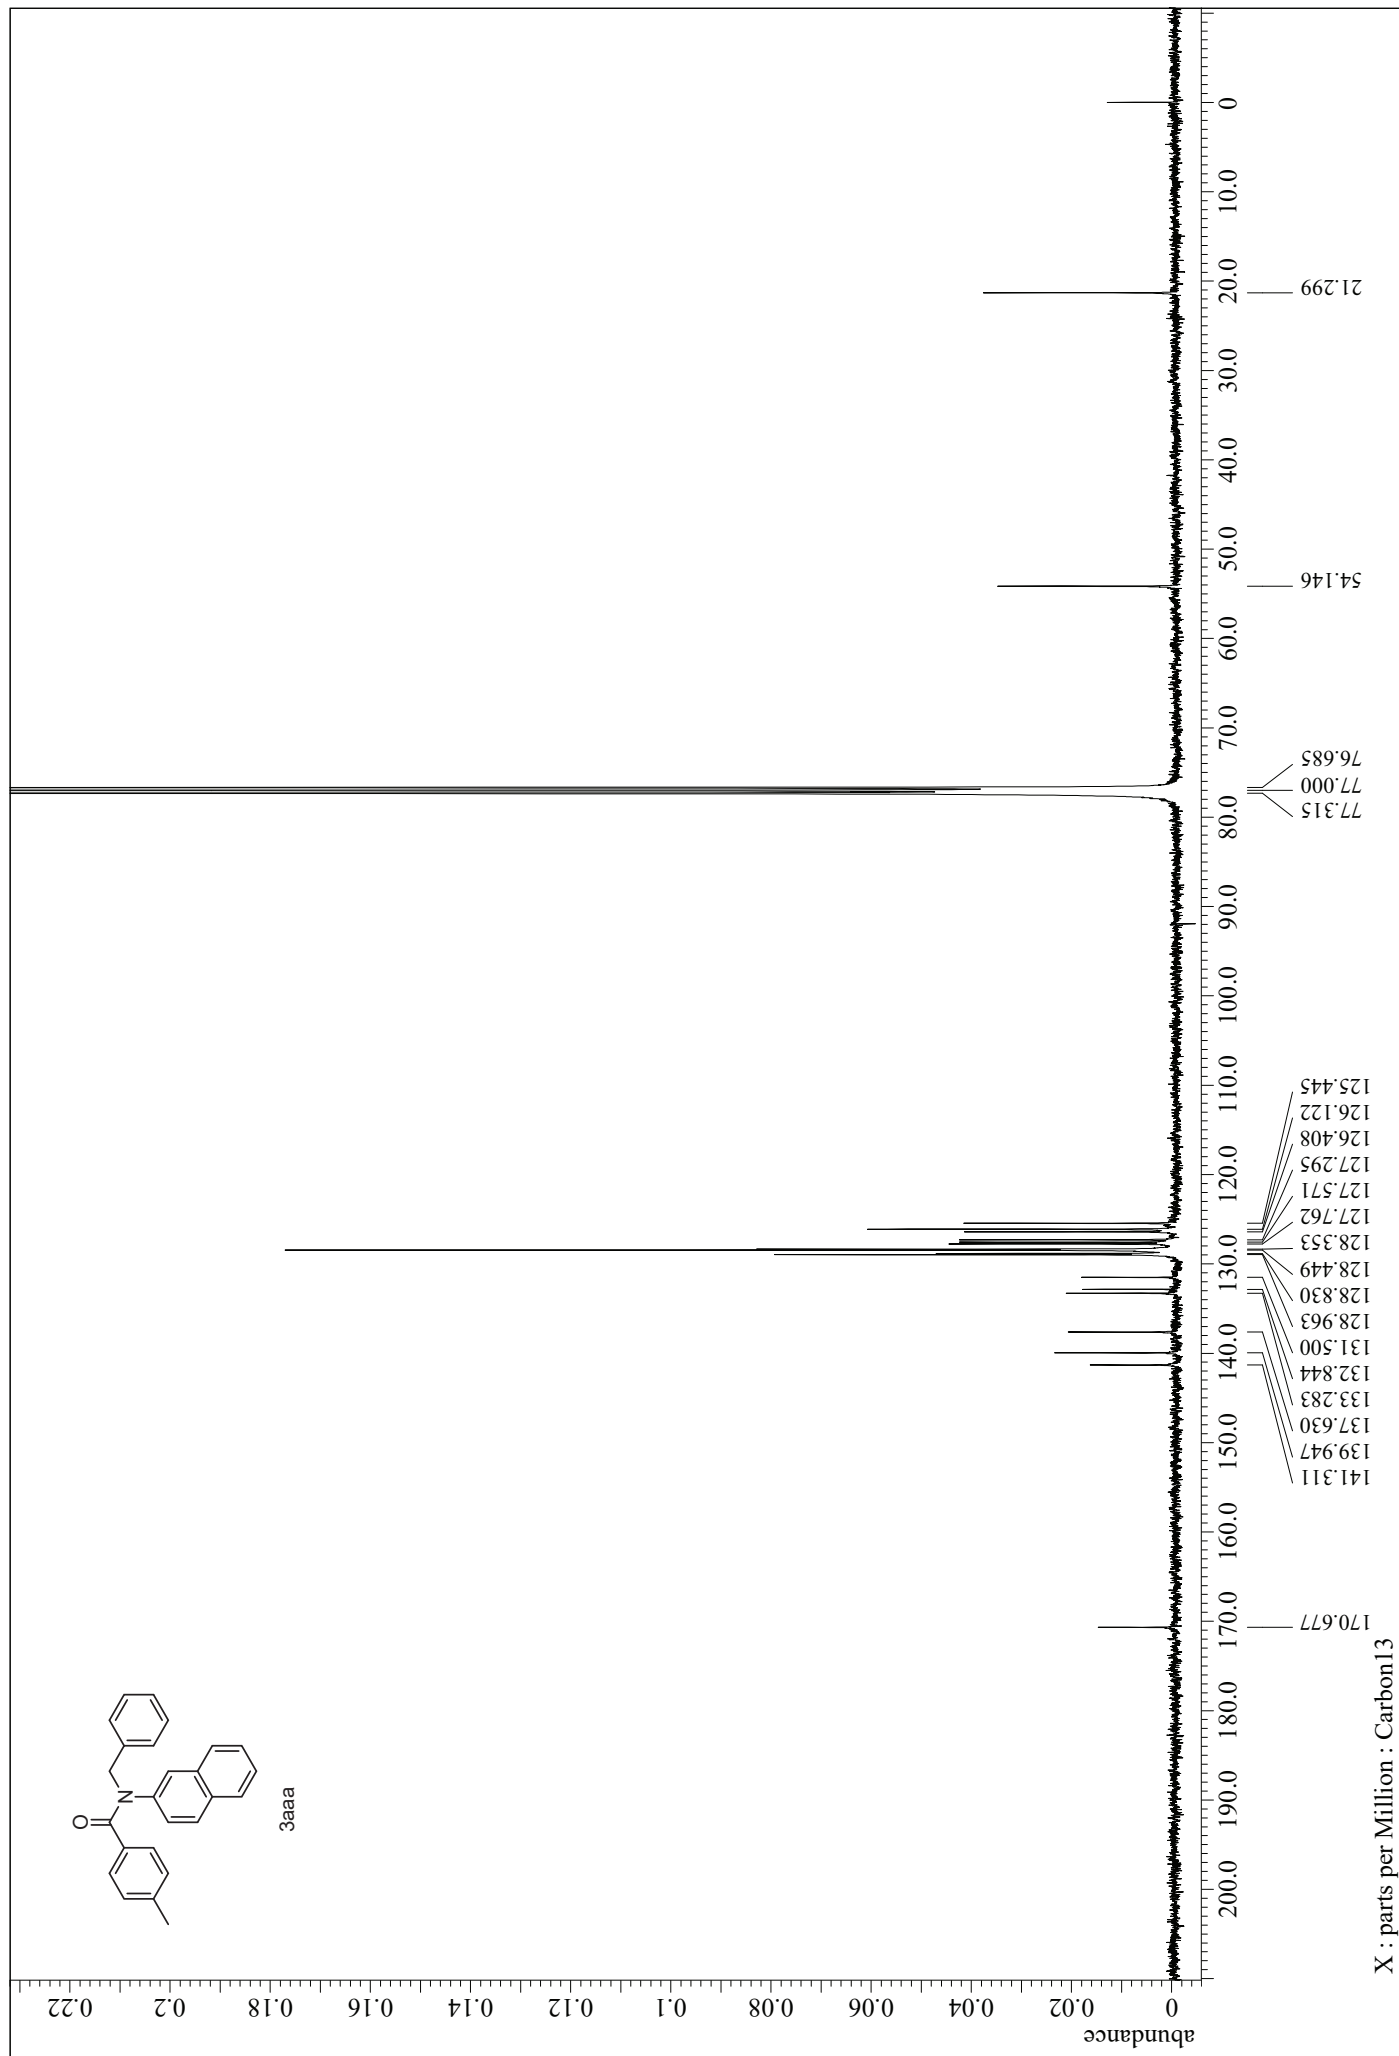



<sup>1</sup>H NMR (400 MHz, CDCl<sub>3</sub>)

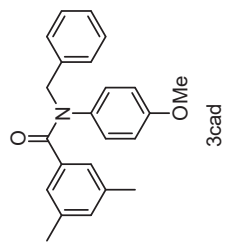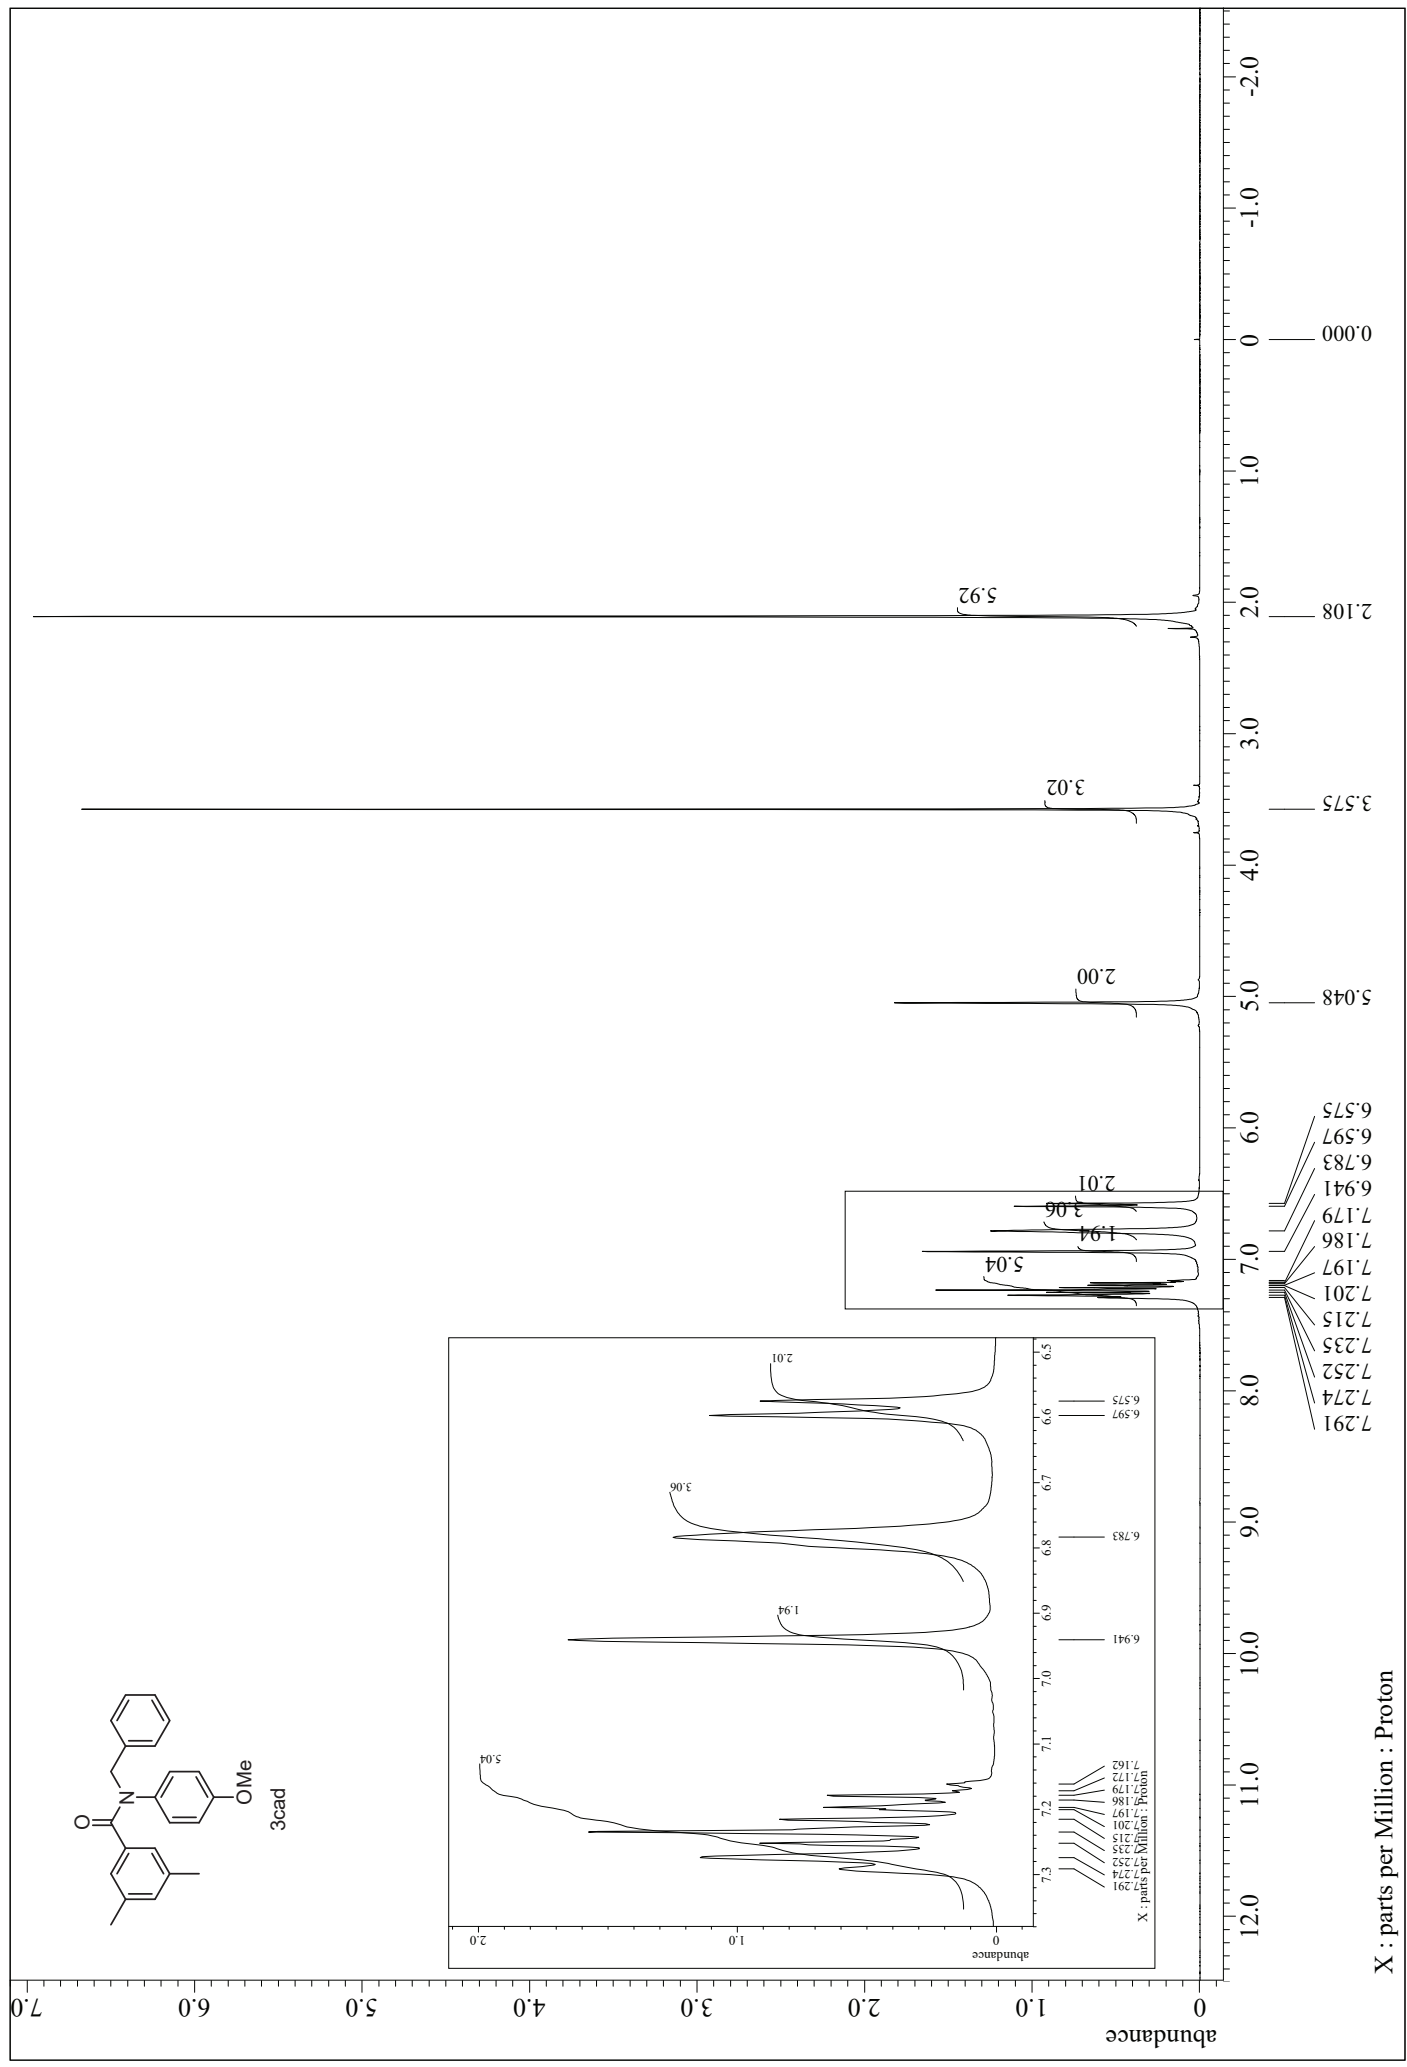

<sup>13</sup>C NMR (101 MHz, CDCl<sub>3</sub>)

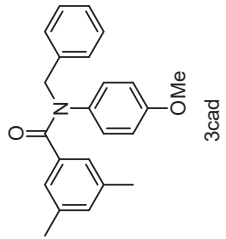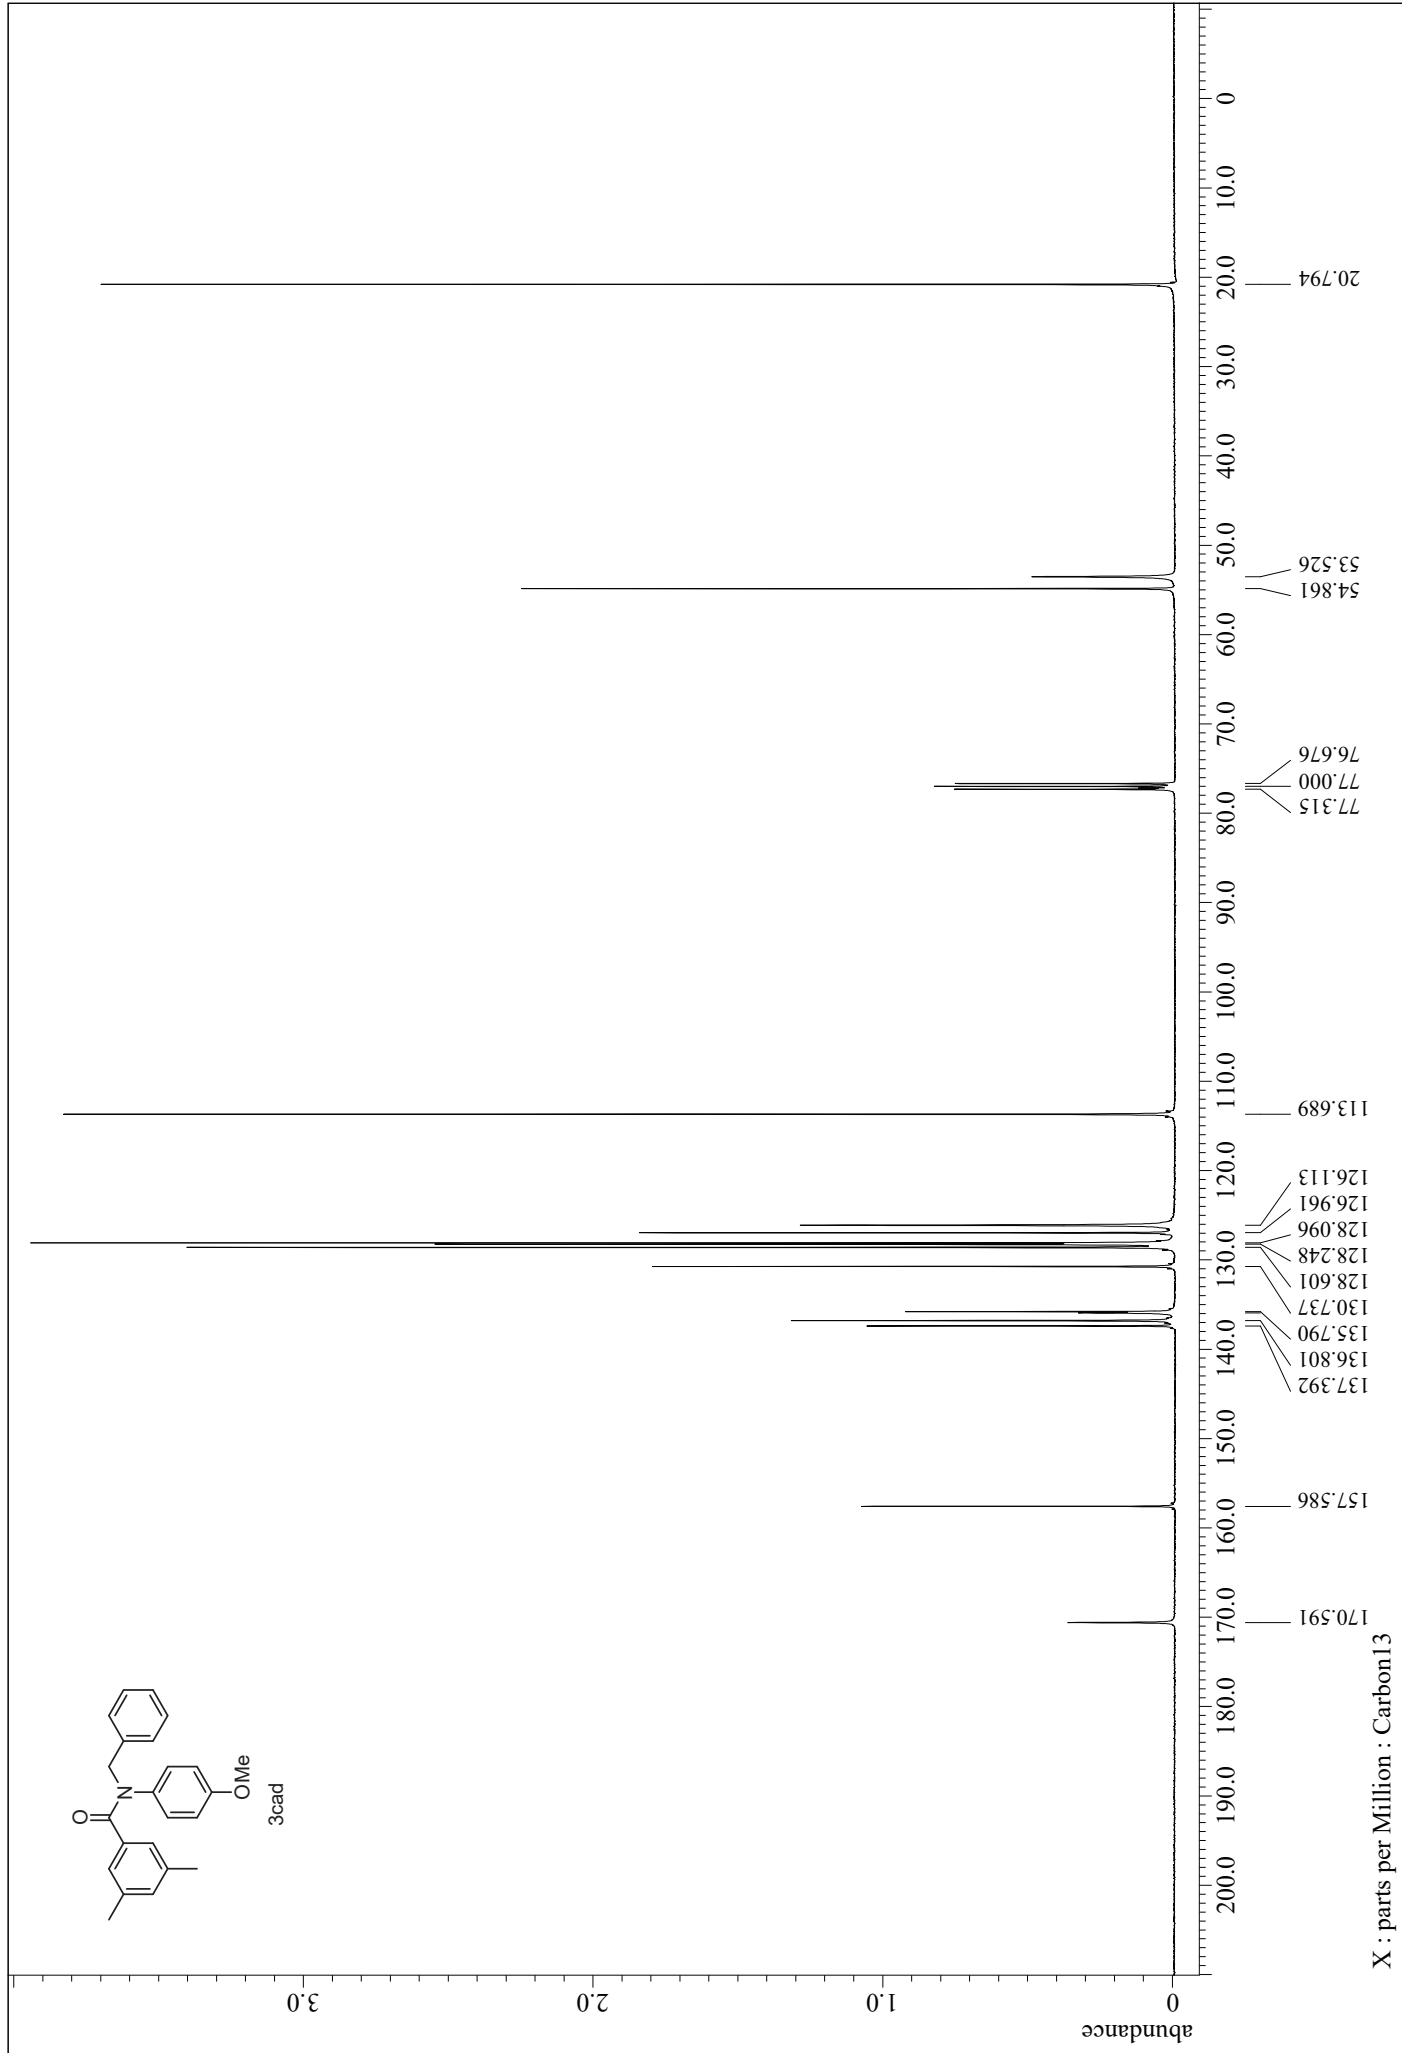

Supplement: d2cc02355e1.pdf [file d2cc02355e1.pdf]
